# Supplementary material for: Transcriptional plasticity enables Staphylococcus aureus adaptation to polymicrobial interactions
Source: Research Square preprint supplement (doi:10.21203/rs.3.rs-6909814/v1), 2025-07-17
Supplement: Supplementary file 1 [file 0276508c6cb28caf72d7436f.xlsx]

## Sheet: All-DEGs
gene_id	SA	SA-P	Pvalue	logFC	category	condition
TRINITY_DN0_c0_g1_i10	84657.4	373.38	1.2848e-103	-0.510721	Downregulated	SA-p vs SA
TRINITY_DN0_c0_g1_i12	3476.54	1.08	2.01909e-79	-0.846321	Downregulated	SA-p vs SA
TRINITY_DN0_c0_g1_i14	175.69	44525.7	1.32796e-238	0.875523	Upregulated	SA-p vs SA
TRINITY_DN0_c0_g1_i15	9324.92	1.35	1.02142e-116	-0.942901	Downregulated	SA-p vs SA
TRINITY_DN0_c0_g1_i19	5153.8	1172.67	0.236079	-0.0119105	Nonsignificant	SA-p vs SA
TRINITY_DN0_c0_g1_i20	25.01	925.27	7.52195e-118	0.632109	Upregulated	SA-p vs SA
TRINITY_DN0_c0_g1_i21	1806.12	1	1.292e-57	-0.77322	Downregulated	SA-p vs SA
TRINITY_DN0_c0_g1_i22	389.68	279.65	2.37671e-15	0.13339	Upregulated	SA-p vs SA
TRINITY_DN0_c0_g1_i26	20406.7	1.61	4.56508e-147	-1.01969	Downregulated	SA-p vs SA
TRINITY_DN0_c0_g1_i27	13.81	23119.3	3.81711e-256	1.11434	Upregulated	SA-p vs SA
TRINITY_DN0_c0_g1_i4	7591.89	2.75	1.5909e-105	-0.826891	Downregulated	SA-p vs SA
TRINITY_DN1_c0_g1_i7	1925.52	1	8.07399e-60	-0.781317	Downregulated	SA-p vs SA
TRINITY_DN1_c13_g1_i1	27	170616	0	1.28236	Upregulated	SA-p vs SA
TRINITY_DN10_c0_g1_i18	125.62	51741	2.38934e-255	0.936955	Upregulated	SA-p vs SA
TRINITY_DN10_c0_g1_i28	63066.7	2.86	1.37087e-193	-1.08973	Downregulated	SA-p vs SA
TRINITY_DN10_c0_g1_i8	541.37	6.47	1.28958e-20	-0.384625	Downregulated	SA-p vs SA
TRINITY_DN10_c0_g2_i1	4415	9	1.74992e-77	-0.608346	Downregulated	SA-p vs SA
TRINITY_DN10_c3_g1_i6	2	22943.1	8.26353e-256	1.35779	Upregulated	SA-p vs SA
TRINITY_DN1000_c0_g1_i1	3161	3	4.84041e-73	-0.705051	Downregulated	SA-p vs SA
TRINITY_DN1000_c0_g5_i1	1292	3	1.50904e-44	-0.591876	Downregulated	SA-p vs SA
TRINITY_DN1001_c0_g1_i1	6420.16	5	3.29962e-96	-0.730063	Downregulated	SA-p vs SA
TRINITY_DN1003_c0_g1_i1	19580	5	1.41073e-141	-0.871113	Downregulated	SA-p vs SA
TRINITY_DN1004_c0_g3_i1	21	54644	1.80535e-293	1.17013	Upregulated	SA-p vs SA
TRINITY_DN1004_c1_g1_i1	14	1860	2.36839e-147	0.793829	Upregulated	SA-p vs SA
TRINITY_DN1008_c0_g1_i1	346.16	7	1.22316e-12	-0.318097	Downregulated	SA-p vs SA
TRINITY_DN1008_c2_g1_i1	1014	1	4.86986e-41	-0.700197	Downregulated	SA-p vs SA
TRINITY_DN1010_c0_g1_i2	315.56	1.15	1.25659e-17	-0.534859	Downregulated	SA-p vs SA
TRINITY_DN1010_c0_g1_i5	106.44	13.85	0.30627	-0.0826017	Nonsignificant	SA-p vs SA
TRINITY_DN1012_c0_g1_i7	9327.74	7	7.79703e-109	-0.734753	Downregulated	SA-p vs SA
TRINITY_DN10131_c0_g3_i1	2042	8	6.37307e-52	-0.525708	Downregulated	SA-p vs SA
TRINITY_DN1015_c0_g2_i1	2168	3	4.83923e-60	-0.657352	Downregulated	SA-p vs SA
TRINITY_DN10197_c0_g1_i2	1003.77	0.21	4.03793e-43	-0.896328	Downregulated	SA-p vs SA
TRINITY_DN102_c0_g1_i2	59	29178	1.28568e-250	0.960089	Upregulated	SA-p vs SA
TRINITY_DN102_c0_g4_i1	1	12545	1.23762e-229	1.3691	Upregulated	SA-p vs SA
TRINITY_DN102_c1_g2_i1	37	6775	2.6804e-199	0.834409	Upregulated	SA-p vs SA
TRINITY_DN102_c1_g3_i1	3	37420	4.93126e-277	1.36838	Upregulated	SA-p vs SA
TRINITY_DN10211_c0_g3_i1	2027.67	1.98	2.53311e-59	-0.701448	Downregulated	SA-p vs SA
TRINITY_DN10211_c0_g3_i2	1509.33	0.02	1.13744e-54	-1.24536	Downregulated	SA-p vs SA
TRINITY_DN1027_c0_g1_i1	13	2	1	-0.0614144	Nonsignificant	SA-p vs SA
TRINITY_DN1029_c0_g1_i1	282	1	1.01148e-15	-0.538314	Downregulated	SA-p vs SA
TRINITY_DN10312_c0_g1_i1	213	1	2.3088e-12	-0.502818	Downregulated	SA-p vs SA
TRINITY_DN10323_c0_g1_i3	810.75	8.51	6.11315e-26	-0.401043	Downregulated	SA-p vs SA
TRINITY_DN10323_c0_g1_i4	39.2	1.49	0.0153481	-0.238267	Downregulated	SA-p vs SA
TRINITY_DN1033_c0_g2_i2	4	48712	1.76502e-288	1.36535	Upregulated	SA-p vs SA
TRINITY_DN10341_c0_g1_i1	937	1	2.88173e-39	-0.690207	Downregulated	SA-p vs SA
TRINITY_DN10364_c0_g1_i1	741	1	2.22248e-33	-0.660521	Downregulated	SA-p vs SA
TRINITY_DN10364_c0_g2_i1	196	1	1.08822e-11	-0.492296	Downregulated	SA-p vs SA
TRINITY_DN10364_c0_g4_i1	261	1	6.53681e-15	-0.528525	Downregulated	SA-p vs SA
TRINITY_DN104_c0_g1_i1	1738	4	1.59697e-51	-0.592997	Downregulated	SA-p vs SA
TRINITY_DN1044_c0_g1_i5	159511	342	1.82307e-133	-0.601961	Downregulated	SA-p vs SA
TRINITY_DN1047_c0_g2_i2	3439.72	5	3.98869e-73	-0.651123	Downregulated	SA-p vs SA
TRINITY_DN105_c0_g1_i4	1137	27733.2	4.25321e-150	0.579415	Upregulated	SA-p vs SA
TRINITY_DN105_c0_g1_i5	16.46	0.93	0.355755	-0.188125	Nonsignificant	SA-p vs SA
TRINITY_DN105_c0_g1_i6	35062.8	2.95	2.065e-168	-1.01156	Downregulated	SA-p vs SA
TRINITY_DN105_c0_g1_i7	9982.75	1	1.61661e-119	-0.989486	Downregulated	SA-p vs SA
TRINITY_DN105_c0_g1_i8	18051.9	0.13	8.04702e-145	-1.3225	Downregulated	SA-p vs SA
TRINITY_DN105_c9_g1_i1	18	12387	4.26083e-229	1.00188	Upregulated	SA-p vs SA
TRINITY_DN10531_c0_g3_i1	22750	5	6.54254e-148	-0.890094	Downregulated	SA-p vs SA
TRINITY_DN1058_c0_g1_i1	1	4245	9.0704e-183	1.23204	Upregulated	SA-p vs SA
TRINITY_DN106_c0_g1_i5	14	219.81	2.00222e-60	0.52369	Upregulated	SA-p vs SA
TRINITY_DN106_c0_g1_i8	10	1147.59	7.90099e-127	0.775305	Upregulated	SA-p vs SA
TRINITY_DN106_c0_g2_i1	29	33438.1	3.70177e-272	1.06717	Upregulated	SA-p vs SA
TRINITY_DN106_c0_g2_i3	7	7009.89	1.92087e-204	1.04934	Upregulated	SA-p vs SA
TRINITY_DN1061_c0_g1_i3	3092.85	6	3.09786e-68	-0.614614	Downregulated	SA-p vs SA
TRINITY_DN1061_c0_g3_i1	264	1	3.53068e-15	-0.529971	Downregulated	SA-p vs SA
TRINITY_DN10628_c0_g1_i1	265.83	1.54	9.64561e-14	-0.476227	Downregulated	SA-p vs SA
TRINITY_DN10628_c0_g1_i3	561.17	1.46	1.80927e-27	-0.577488	Downregulated	SA-p vs SA
TRINITY_DN10628_c1_g1_i1	3098	2	2.10728e-73	-0.753794	Downregulated	SA-p vs SA
TRINITY_DN10647_c0_g1_i1	587	1	1.37839e-28	-0.63105	Downregulated	SA-p vs SA
TRINITY_DN1067_c0_g1_i3	116.88	1	5.27277e-07	-0.426903	Downregulated	SA-p vs SA
TRINITY_DN1069_c0_g1_i1	298.15	1	1.28036e-16	-0.545359	Downregulated	SA-p vs SA
TRINITY_DN107_c0_g3_i1	6	1508	2.26128e-138	0.87447	Upregulated	SA-p vs SA
TRINITY_DN10775_c0_g1_i1	5	1959.61	1.47773e-149	0.93067	Upregulated	SA-p vs SA
TRINITY_DN10869_c0_g1_i1	1	228	2.61096e-61	0.862145	Upregulated	SA-p vs SA
TRINITY_DN1088_c1_g1_i1	3117	29	1.55139e-49	-0.4163	Downregulated	SA-p vs SA
TRINITY_DN1088_c1_g3_i1	263	1	4.80239e-15	-0.529491	Downregulated	SA-p vs SA
TRINITY_DN1090_c0_g1_i1	15732.9	17.53	2.76113e-119	-0.684757	Downregulated	SA-p vs SA
TRINITY_DN1090_c0_g1_i3	11003.1	24.47	5.8978e-100	-0.597334	Downregulated	SA-p vs SA
TRINITY_DN10914_c0_g4_i1	17	13288	3.88026e-232	1.01799	Upregulated	SA-p vs SA
TRINITY_DN1093_c0_g3_i1	3371.71	3	6.40613e-75	-0.713214	Downregulated	SA-p vs SA
TRINITY_DN10932_c2_g1_i2	10875.7	10	1.66437e-111	-0.709057	Downregulated	SA-p vs SA
TRINITY_DN11_c0_g1_i19	74.86	1.03	0.000184687	-0.366806	Downregulated	SA-p vs SA
TRINITY_DN11_c0_g1_i22	93.49	15.87	0.849198	-0.0489701	Nonsignificant	SA-p vs SA
TRINITY_DN11_c0_g1_i6	18.87	36.8	4.72798e-12	0.259849	Upregulated	SA-p vs SA
TRINITY_DN110_c0_g1_i2	793.93	13	1.5842e-22	-0.344794	Downregulated	SA-p vs SA
TRINITY_DN11120_c2_g1_i1	1	1204	9.08219e-129	1.07264	Upregulated	SA-p vs SA
TRINITY_DN11123_c0_g1_i1	368	2	1.78709e-18	-0.484305	Downregulated	SA-p vs SA
TRINITY_DN11143_c0_g1_i1	14	211	6.56758e-59	0.518516	Upregulated	SA-p vs SA
TRINITY_DN1115_c0_g1_i1	570	2	2.97854e-26	-0.539653	Downregulated	SA-p vs SA
TRINITY_DN1115_c0_g1_i2	1062	2	1.0174e-40	-0.618368	Downregulated	SA-p vs SA
TRINITY_DN112_c0_g1_i3	374.62	1.21	2.42329e-20	-0.550127	Downregulated	SA-p vs SA
TRINITY_DN112_c0_g1_i7	156.29	1.79	3.7307e-08	-0.39001	Downregulated	SA-p vs SA
TRINITY_DN113_c0_g2_i2	88	58225.5	7.93288e-271	0.996913	Upregulated	SA-p vs SA
TRINITY_DN113_c0_g3_i5	5602.99	14.63	1.16188e-80	-0.577031	Downregulated	SA-p vs SA
TRINITY_DN113_c0_g3_i6	181.25	3.37	1.40778e-08	-0.328719	Downregulated	SA-p vs SA
TRINITY_DN113_c0_g3_i7	551	1	4.32752e-27	-0.623044	Downregulated	SA-p vs SA
TRINITY_DN1135_c0_g1_i1	25	1	0.0884894	-0.231813	Nonsignificant	SA-p vs SA
TRINITY_DN1137_c0_g1_i1	961.4	2.74	2.70334e-36	-0.565957	Downregulated	SA-p vs SA
TRINITY_DN1137_c0_g1_i2	1828.76	1.77	2.47994e-56	-0.702569	Downregulated	SA-p vs SA
TRINITY_DN1137_c0_g1_i3	44.83	0.48	0.000143701	-0.398529	Downregulated	SA-p vs SA
TRINITY_DN1139_c1_g1_i1	319	2	2.90749e-16	-0.46623	Downregulated	SA-p vs SA
TRINITY_DN11398_c0_g1_i2	4170.19	2	4.56088e-84	-0.791389	Downregulated	SA-p vs SA
TRINITY_DN11398_c0_g5_i1	74	1	7.45732e-05	-0.369084	Downregulated	SA-p vs SA
TRINITY_DN114_c0_g1_i16	44.54	0.47	0.000143701	-0.400372	Downregulated	SA-p vs SA
TRINITY_DN114_c0_g1_i5	7274.94	3.53	9.64599e-103	-0.789912	Downregulated	SA-p vs SA
TRINITY_DN11408_c1_g1_i1	51	548	2.61331e-85	0.475716	Upregulated	SA-p vs SA
TRINITY_DN1145_c0_g2_i3	2701	13	2.17774e-56	-0.499673	Downregulated	SA-p vs SA
TRINITY_DN1145_c1_g1_i1	221	1	6.22166e-13	-0.507482	Downregulated	SA-p vs SA
TRINITY_DN1146_c0_g1_i4	588.41	3	1.64643e-25	-0.492385	Downregulated	SA-p vs SA
TRINITY_DN1147_c0_g1_i1	1764	3	1.68093e-53	-0.631266	Downregulated	SA-p vs SA
TRINITY_DN1147_c0_g1_i4	629	1	9.67339e-30	-0.639792	Downregulated	SA-p vs SA
TRINITY_DN115_c0_g2_i3	1	329.93	1.91319e-75	0.90889	Upregulated	SA-p vs SA
TRINITY_DN11549_c0_g2_i1	690.5	4	1.54025e-27	-0.476233	Downregulated	SA-p vs SA
TRINITY_DN1155_c1_g1_i1	151	1	4.03391e-09	-0.459302	Downregulated	SA-p vs SA
TRINITY_DN11567_c0_g2_i1	1	3772	1.12887e-177	1.21709	Upregulated	SA-p vs SA
TRINITY_DN11580_c0_g1_i1	16	1940	3.65694e-149	0.782265	Upregulated	SA-p vs SA
TRINITY_DN116_c0_g1_i11	3.85	62649.6	2.10834e-299	1.40201	Upregulated	SA-p vs SA
TRINITY_DN116_c0_g1_i13	4.15	54658.4	1.76959e-293	1.37526	Upregulated	SA-p vs SA
TRINITY_DN116_c0_g1_i5	44982.9	14	1.91908e-167	-0.846087	Downregulated	SA-p vs SA
TRINITY_DN11600_c0_g1_i1	11	1403	2.51658e-135	0.788668	Upregulated	SA-p vs SA
TRINITY_DN11637_c0_g2_i1	13	369	4.36954e-80	0.598593	Upregulated	SA-p vs SA
TRINITY_DN11652_c1_g1_i1	1544.47	4	3.82233e-48	-0.578064	Downregulated	SA-p vs SA
TRINITY_DN11655_c1_g4_i1	11856	5	3.93272e-121	-0.807654	Downregulated	SA-p vs SA
TRINITY_DN11656_c0_g1_i1	3314	2	6.52397e-76	-0.762319	Downregulated	SA-p vs SA
TRINITY_DN11667_c0_g3_i1	3.05	34950.1	4.53083e-274	1.35765	Upregulated	SA-p vs SA
TRINITY_DN11667_c0_g3_i2	28.95	43683.9	9.34448e-284	1.1012	Upregulated	SA-p vs SA
TRINITY_DN1172_c0_g1_i2	4101.85	4	9.14307e-81	-0.701619	Downregulated	SA-p vs SA
TRINITY_DN1176_c0_g1_i1	7	2570	3.50831e-161	0.922408	Upregulated	SA-p vs SA
TRINITY_DN1177_c0_g1_i2	1	2952.59	3.89268e-167	1.18611	Upregulated	SA-p vs SA
TRINITY_DN1177_c0_g1_i6	16	436.05	7.99642e-87	0.593447	Upregulated	SA-p vs SA
TRINITY_DN1194_c2_g5_i1	1	1812.03	3.43414e-146	1.12435	Upregulated	SA-p vs SA
TRINITY_DN1198_c0_g1_i1	745	1	1.53866e-33	-0.661202	Downregulated	SA-p vs SA
TRINITY_DN11980_c0_g1_i1	1	12524	1.46287e-229	1.36889	Upregulated	SA-p vs SA
TRINITY_DN12_c0_g2_i1	14	13280	4.13029e-232	1.04248	Upregulated	SA-p vs SA
TRINITY_DN12_c0_g5_i1	18	18726	5.22555e-247	1.05416	Upregulated	SA-p vs SA
TRINITY_DN12_c4_g1_i1	51	29197	9.72268e-255	0.978603	Upregulated	SA-p vs SA
TRINITY_DN120_c0_g1_i1	120	1	3.62217e-07	-0.430235	Downregulated	SA-p vs SA
TRINITY_DN120_c0_g2_i1	10853	44	4.49302e-87	-0.521377	Downregulated	SA-p vs SA
TRINITY_DN120_c1_g1_i2	9885	2	2.21409e-117	-0.900561	Downregulated	SA-p vs SA
TRINITY_DN12015_c0_g1_i1	42281.3	20	1.56687e-159	-0.793134	Downregulated	SA-p vs SA
TRINITY_DN121_c0_g1_i2	5856.67	1	1.71789e-98	-0.922029	Downregulated	SA-p vs SA
TRINITY_DN121_c0_g1_i7	10432	18	1.99474e-102	-0.629436	Downregulated	SA-p vs SA
TRINITY_DN121_c1_g1_i3	844.63	7.85155e+06	0	1.33119	Upregulated	SA-p vs SA
TRINITY_DN1211_c0_g1_i1	714	1	2.07461e-32	-0.655825	Downregulated	SA-p vs SA
TRINITY_DN1213_c2_g1_i1	1	186	7.67625e-54	0.836391	Upregulated	SA-p vs SA
TRINITY_DN1217_c0_g1_i1	261	1	6.53681e-15	-0.528525	Downregulated	SA-p vs SA
TRINITY_DN122_c1_g1_i2	1	1739	1.97348e-144	1.11915	Upregulated	SA-p vs SA
TRINITY_DN12202_c0_g1_i1	5	44929	5.69742e-285	1.3269	Upregulated	SA-p vs SA
TRINITY_DN12206_c0_g1_i2	5	84.2	2.38767e-30	0.532551	Upregulated	SA-p vs SA
TRINITY_DN123_c0_g1_i1	1	17798	8.52426e-245	1.41335	Upregulated	SA-p vs SA
TRINITY_DN1230_c0_g1_i1	332	1	4.33104e-18	-0.558962	Downregulated	SA-p vs SA
TRINITY_DN124_c0_g1_i18	50.96	71097.4	2.35794e-293	1.09128	Upregulated	SA-p vs SA
TRINITY_DN124_c0_g1_i2	2.71	31342.9	2.41293e-269	1.35882	Upregulated	SA-p vs SA
TRINITY_DN124_c0_g1_i28	13.35	59347.7	4.71218e-297	1.23787	Upregulated	SA-p vs SA
TRINITY_DN124_c0_g1_i5	61.98	36515	2.08679e-259	0.98223	Upregulated	SA-p vs SA
TRINITY_DN124_c1_g1_i1	3	67426	1.36524e-302	1.44286	Upregulated	SA-p vs SA
TRINITY_DN12401_c0_g3_i1	44	15111	9.57153e-230	0.913963	Upregulated	SA-p vs SA
TRINITY_DN1244_c0_g2_i1	32	19013	1.13114e-247	0.983302	Upregulated	SA-p vs SA
TRINITY_DN1244_c1_g1_i1	1	9720	1.39372e-218	1.33683	Upregulated	SA-p vs SA
TRINITY_DN12454_c0_g1_i1	222	1	6.22166e-13	-0.508053	Downregulated	SA-p vs SA
TRINITY_DN1246_c0_g3_i1	137.17	1	1.81193e-08	-0.447151	Downregulated	SA-p vs SA
TRINITY_DN12487_c0_g1_i1	18444	9	9.47628e-135	-0.7892	Downregulated	SA-p vs SA
TRINITY_DN125_c0_g1_i12	23233.4	115	1.65984e-91	-0.496129	Downregulated	SA-p vs SA
TRINITY_DN1255_c0_g1_i1	101.92	0.35	2.63022e-08	-0.542375	Downregulated	SA-p vs SA
TRINITY_DN1255_c0_g1_i3	1170.84	2.65	1.56225e-41	-0.595112	Downregulated	SA-p vs SA
TRINITY_DN126_c1_g1_i1	175	2	2.56281e-09	-0.390281	Downregulated	SA-p vs SA
TRINITY_DN12600_c0_g6_i1	29	38427	3.42508e-278	1.08476	Upregulated	SA-p vs SA
TRINITY_DN12603_c0_g1_i2	320.57	3.93	7.24484e-14	-0.381404	Downregulated	SA-p vs SA
TRINITY_DN12603_c0_g1_i4	4709.43	2.09	9.28355e-89	-0.801203	Downregulated	SA-p vs SA
TRINITY_DN12603_c1_g2_i1	349	1	6.24221e-19	-0.565279	Downregulated	SA-p vs SA
TRINITY_DN1261_c0_g1_i1	5	5835	1.65244e-196	1.06869	Upregulated	SA-p vs SA
TRINITY_DN1262_c0_g1_i1	11	48739	1.66649e-288	1.23746	Upregulated	SA-p vs SA
TRINITY_DN1262_c0_g2_i1	2	34135	4.78477e-273	1.40805	Upregulated	SA-p vs SA
TRINITY_DN1262_c0_g3_i1	17	34456	1.86502e-273	1.13852	Upregulated	SA-p vs SA
TRINITY_DN1262_c0_g5_i1	47	53233	4.14831e-283	1.06491	Upregulated	SA-p vs SA
TRINITY_DN1262_c0_g6_i1	1	3967	7.54477e-180	1.22347	Upregulated	SA-p vs SA
TRINITY_DN1262_c0_g7_i1	1	6631	4.96005e-202	1.28845	Upregulated	SA-p vs SA
TRINITY_DN1262_c0_g8_i1	781	6942161	0	1.32552	Upregulated	SA-p vs SA
TRINITY_DN1262_c11_g1_i1	3	12968	4.5025e-231	1.23433	Upregulated	SA-p vs SA
TRINITY_DN1263_c0_g1_i1	1	357	1.70265e-78	0.918864	Upregulated	SA-p vs SA
TRINITY_DN1264_c0_g2_i1	2536	7	3.34918e-60	-0.570005	Downregulated	SA-p vs SA
TRINITY_DN1266_c0_g1_i2	1780	3	7.65883e-54	-0.632408	Downregulated	SA-p vs SA
TRINITY_DN1266_c0_g1_i3	383	1	2.86057e-20	-0.577038	Downregulated	SA-p vs SA
TRINITY_DN12676_c0_g1_i2	3229.67	2	5.95235e-75	-0.759059	Downregulated	SA-p vs SA
TRINITY_DN12676_c0_g2_i1	622.1	1	2.18566e-29	-0.638397	Downregulated	SA-p vs SA
TRINITY_DN12676_c1_g1_i1	729	1	6.75004e-33	-0.658455	Downregulated	SA-p vs SA
TRINITY_DN12680_c0_g3_i1	5	2977	1.71694e-167	0.983567	Upregulated	SA-p vs SA
TRINITY_DN127_c0_g3_i2	7.65	5270.27	4.11516e-192	1.00202	Upregulated	SA-p vs SA
TRINITY_DN127_c0_g3_i3	22.35	2479.43	1.11582e-159	0.77102	Upregulated	SA-p vs SA
TRINITY_DN127_c0_g6_i1	1	1510	2.13619e-138	1.10129	Upregulated	SA-p vs SA
TRINITY_DN1278_c0_g1_i1	36	208	2.5571e-54	0.397234	Upregulated	SA-p vs SA
TRINITY_DN128_c2_g1_i5	204	5	3.36091e-08	-0.293771	Downregulated	SA-p vs SA
TRINITY_DN1289_c0_g2_i1	833	2	2.35357e-34	-0.587645	Downregulated	SA-p vs SA
TRINITY_DN129_c0_g2_i1	35549.2	12	4.91055e-159	-0.835814	Downregulated	SA-p vs SA
TRINITY_DN1292_c0_g2_i1	724	1	9.80101e-33	-0.657585	Downregulated	SA-p vs SA
TRINITY_DN1296_c0_g1_i1	1	7016	1.79395e-204	1.29559	Upregulated	SA-p vs SA
TRINITY_DN13_c0_g3_i2	18	25002.3	1.52711e-259	1.09072	Upregulated	SA-p vs SA
TRINITY_DN13_c0_g4_i2	0.09	1928.68	7.46027e-149	1.43684	Upregulated	SA-p vs SA
TRINITY_DN13_c0_g4_i3	0.91	635.32	6.63552e-102	1.00371	Upregulated	SA-p vs SA
TRINITY_DN13_c0_g5_i1	7	8205	2.97202e-211	1.06925	Upregulated	SA-p vs SA
TRINITY_DN13_c0_g6_i1	5	6508	3.15627e-201	1.0825	Upregulated	SA-p vs SA
TRINITY_DN13_c1_g4_i1	18	8703	8.16516e-214	0.957233	Upregulated	SA-p vs SA
TRINITY_DN13038_c0_g1_i1	18	1	0.401742	-0.190258	Nonsignificant	SA-p vs SA
TRINITY_DN1304_c0_g1_i5	15	1	0.355755	-0.167196	Nonsignificant	SA-p vs SA
TRINITY_DN13047_c0_g1_i1	13	6548.56	1.64126e-201	0.962419	Upregulated	SA-p vs SA
TRINITY_DN13074_c0_g1_i1	40	1	0.0101133	-0.291266	Downregulated	SA-p vs SA
TRINITY_DN13078_c0_g1_i2	1834	3	8.26382e-55	-0.636188	Downregulated	SA-p vs SA
TRINITY_DN13095_c0_g1_i1	1	2937	6.71019e-167	1.18544	Upregulated	SA-p vs SA
TRINITY_DN131_c0_g2_i2	4370	1	1.40713e-87	-0.884988	Downregulated	SA-p vs SA
TRINITY_DN1310_c0_g1_i2	10	7962.39	5.90087e-210	1.02033	Upregulated	SA-p vs SA
TRINITY_DN1323_c0_g1_i1	23	74103.3	1.08049e-306	1.19715	Upregulated	SA-p vs SA
TRINITY_DN1323_c0_g3_i1	17	1835.12	8.73108e-147	0.767566	Upregulated	SA-p vs SA
TRINITY_DN1323_c4_g1_i1	16	5303	2.13019e-192	0.909466	Upregulated	SA-p vs SA
TRINITY_DN1325_c0_g2_i1	9	33254	6.49656e-272	1.21448	Upregulated	SA-p vs SA
TRINITY_DN1326_c0_g1_i2	2	1477	1.84611e-137	1.01081	Upregulated	SA-p vs SA
TRINITY_DN1326_c1_g2_i1	8	11149	1.58078e-224	1.09114	Upregulated	SA-p vs SA
TRINITY_DN1327_c0_g2_i3	488.66	1	6.85812e-25	-0.607856	Downregulated	SA-p vs SA
TRINITY_DN1328_c0_g1_i4	90	1	1.14762e-05	-0.393845	Downregulated	SA-p vs SA
TRINITY_DN133_c0_g1_i4	26	14.25	0.0140563	0.0992929	Upregulated	SA-p vs SA
TRINITY_DN133_c0_g2_i3	13	4875	9.21575e-189	0.925087	Upregulated	SA-p vs SA
TRINITY_DN1332_c0_g1_i1	4101.87	3	2.43871e-82	-0.73801	Downregulated	SA-p vs SA
TRINITY_DN1332_c0_g2_i1	490	1	6.85812e-25	-0.608203	Downregulated	SA-p vs SA
TRINITY_DN134_c0_g1_i5	1164.87	25	7.04698e-24	-0.31057	Downregulated	SA-p vs SA
TRINITY_DN1342_c0_g1_i2	767.24	1	2.98806e-34	-0.664922	Downregulated	SA-p vs SA
TRINITY_DN1342_c0_g1_i3	402.4	1	3.58416e-21	-0.583288	Downregulated	SA-p vs SA
TRINITY_DN1344_c0_g1_i1	4383.85	1.26	1.01656e-87	-0.856154	Downregulated	SA-p vs SA
TRINITY_DN1344_c0_g1_i2	112.15	0.74	6.09387e-07	-0.459765	Downregulated	SA-p vs SA
TRINITY_DN1344_c0_g2_i1	460	1	1.49383e-23	-0.600211	Downregulated	SA-p vs SA
TRINITY_DN135_c0_g1_i14	15358.1	31352.5	3.49284e-52	0.265633	Upregulated	SA-p vs SA
TRINITY_DN135_c0_g1_i3	58.05	3.48	0.023845	-0.180632	Downregulated	SA-p vs SA
TRINITY_DN135_c0_g1_i6	5522	1	3.61715e-96	-0.914585	Downregulated	SA-p vs SA
TRINITY_DN1351_c0_g1_i2	23	1	0.13207	-0.221265	Nonsignificant	SA-p vs SA
TRINITY_DN13536_c0_g1_i1	29	1	0.11103	-0.250587	Nonsignificant	SA-p vs SA
TRINITY_DN13536_c0_g2_i1	163	4	7.57792e-07	-0.293616	Downregulated	SA-p vs SA
TRINITY_DN13582_c0_g1_i1	14	1016	1.1088e-121	0.717337	Upregulated	SA-p vs SA
TRINITY_DN136_c0_g2_i1	557	1	2.79569e-27	-0.624414	Downregulated	SA-p vs SA
TRINITY_DN13613_c0_g2_i3	1	2188	2.91983e-154	1.1482	Upregulated	SA-p vs SA
TRINITY_DN13613_c1_g1_i2	5	44996	4.90961e-285	1.32708	Upregulated	SA-p vs SA
TRINITY_DN13648_c0_g1_i1	385	1	2.20194e-20	-0.577697	Downregulated	SA-p vs SA
TRINITY_DN1367_c1_g1_i8	646.9	1.58	7.75692e-29	-0.585479	Downregulated	SA-p vs SA
TRINITY_DN1373_c0_g1_i1	1444	1	8.99544e-51	-0.744915	Downregulated	SA-p vs SA
TRINITY_DN1377_c0_g1_i1	505.89	1.52	5.17609e-24	-0.559275	Downregulated	SA-p vs SA
TRINITY_DN1377_c0_g1_i4	270.13	6.51	1.43022e-09	-0.295906	Downregulated	SA-p vs SA
TRINITY_DN1377_c0_g1_i5	8466.21	3.97	2.41275e-108	-0.794235	Downregulated	SA-p vs SA
TRINITY_DN138_c0_g1_i13	2039	2	1.6256e-59	-0.700881	Downregulated	SA-p vs SA
TRINITY_DN138_c0_g1_i8	207	17	0.00265305	-0.140816	Downregulated	SA-p vs SA
TRINITY_DN1380_c0_g1_i3	1010.48	13	7.66447e-28	-0.375303	Downregulated	SA-p vs SA
TRINITY_DN13829_c1_g3_i11	20.74	0.03	0.0139512	-0.65174	Downregulated	SA-p vs SA
TRINITY_DN13829_c1_g3_i4	510.98	10.97	1.59503e-15	-0.31053	Downregulated	SA-p vs SA
TRINITY_DN1389_c0_g1_i1	16.38	10.72	0.0143062	0.121732	Upregulated	SA-p vs SA
TRINITY_DN139_c0_g1_i5	359.06	0.53	1.59477e-19	-0.649182	Downregulated	SA-p vs SA
TRINITY_DN139_c0_g1_i6	749.07	1.47	1.28088e-33	-0.613157	Downregulated	SA-p vs SA
TRINITY_DN14_c1_g1_i11	92.89	33712.2	4.52569e-245	0.920947	Upregulated	SA-p vs SA
TRINITY_DN14_c1_g1_i3	63.11	74727.8	1.76102e-290	1.07053	Upregulated	SA-p vs SA
TRINITY_DN14_c1_g1_i4	14	3290	8.15841e-172	0.865971	Upregulated	SA-p vs SA
TRINITY_DN14_c1_g1_i8	1	13759	1.22926e-233	1.38079	Upregulated	SA-p vs SA
TRINITY_DN14_c1_g3_i1	11	6859	1.65801e-203	0.989409	Upregulated	SA-p vs SA
TRINITY_DN14_c1_g5_i1	1	14996	2.27836e-237	1.39168	Upregulated	SA-p vs SA
TRINITY_DN1404_c0_g1_i1	17	6	0.381255	0.0436206	Nonsignificant	SA-p vs SA
TRINITY_DN14049_c0_g1_i1	2	25	1.42164e-10	0.494852	Upregulated	SA-p vs SA
TRINITY_DN141_c0_g3_i2	11	765.06	9.1417e-110	0.711959	Upregulated	SA-p vs SA
TRINITY_DN141_c1_g1_i1	18	18173	1.04252e-245	1.05037	Upregulated	SA-p vs SA
TRINITY_DN141_c1_g2_i1	1	16601.4	8.89425e-242	1.40454	Upregulated	SA-p vs SA
TRINITY_DN141_c1_g8_i1	21	5419	2.44005e-193	0.877805	Upregulated	SA-p vs SA
TRINITY_DN14192_c0_g1_i1	3972	2	9.21685e-83	-0.785229	Downregulated	SA-p vs SA
TRINITY_DN14192_c0_g2_i1	2299	3	4.54702e-62	-0.664773	Downregulated	SA-p vs SA
TRINITY_DN142_c0_g2_i1	26	135850	0	1.25831	Upregulated	SA-p vs SA
TRINITY_DN143_c0_g1_i4	53	73	5.45221e-16	0.215859	Upregulated	SA-p vs SA
TRINITY_DN1432_c0_g1_i2	693	2	5.36129e-30	-0.564369	Downregulated	SA-p vs SA
TRINITY_DN14395_c1_g1_i3	403	2	9.07606e-20	-0.495797	Downregulated	SA-p vs SA
TRINITY_DN14395_c1_g1_i4	4945.63	6	5.37528e-85	-0.673992	Downregulated	SA-p vs SA
TRINITY_DN144_c0_g1_i4	275	1	7.66526e-16	-0.535135	Downregulated	SA-p vs SA
TRINITY_DN144_c0_g2_i1	1	31	1.17118e-12	0.609742	Upregulated	SA-p vs SA
TRINITY_DN1453_c0_g1_i7	110.86	1	6.09387e-07	-0.420214	Downregulated	SA-p vs SA
TRINITY_DN1453_c1_g1_i1	490	1	6.85812e-25	-0.608203	Downregulated	SA-p vs SA
TRINITY_DN1456_c0_g3_i1	363	1	9.28004e-20	-0.570254	Downregulated	SA-p vs SA
TRINITY_DN14573_c0_g1_i1	73	2	0.00125538	-0.279683	Downregulated	SA-p vs SA
TRINITY_DN146_c0_g2_i3	7.09	583.53	1.52717e-98	0.733255	Upregulated	SA-p vs SA
TRINITY_DN146_c1_g4_i1	24	13305	3.38042e-232	0.974536	Upregulated	SA-p vs SA
TRINITY_DN1461_c0_g1_i1	916	2	5.52441e-37	-0.59966	Downregulated	SA-p vs SA
TRINITY_DN1461_c1_g1_i2	6060.57	23	2.46681e-77	-0.529733	Downregulated	SA-p vs SA
TRINITY_DN1461_c1_g2_i1	548	1	6.71058e-27	-0.622354	Downregulated	SA-p vs SA
TRINITY_DN1461_c1_g3_i2	203.83	8	2.51695e-06	-0.234212	Downregulated	SA-p vs SA
TRINITY_DN1467_c0_g2_i1	4598	2	7.96223e-88	-0.803742	Downregulated	SA-p vs SA
TRINITY_DN14690_c0_g2_i2	13.27	13.91	0.000421961	0.181318	Upregulated	SA-p vs SA
TRINITY_DN14690_c0_g2_i4	32.73	38.09	2.8254e-09	0.194544	Upregulated	SA-p vs SA
TRINITY_DN1479_c0_g1_i1	14	1498	4.00215e-138	0.76645	Upregulated	SA-p vs SA
TRINITY_DN149_c1_g3_i2	24	273.6	6.40284e-69	0.4832	Upregulated	SA-p vs SA
TRINITY_DN1491_c0_g1_i1	584	3	2.47647e-25	-0.491433	Downregulated	SA-p vs SA
TRINITY_DN1496_c0_g1_i1	47	13466	1.64928e-223	0.891041	Upregulated	SA-p vs SA
TRINITY_DN1497_c1_g1_i2	530.78	1	3.16028e-26	-0.618315	Downregulated	SA-p vs SA
TRINITY_DN1497_c1_g1_i4	279.81	1	1.36262e-15	-0.537328	Downregulated	SA-p vs SA
TRINITY_DN1497_c2_g1_i1	3638.19	2	2.06165e-79	-0.774125	Downregulated	SA-p vs SA
TRINITY_DN1497_c2_g1_i2	74.81	4	0.00931543	-0.195102	Downregulated	SA-p vs SA
TRINITY_DN15_c0_g1_i10	1018.95	2	1.62714e-39	-0.613133	Downregulated	SA-p vs SA
TRINITY_DN15_c0_g1_i13	610.29	1	6.10839e-29	-0.635972	Downregulated	SA-p vs SA
TRINITY_DN150_c0_g2_i6	1	745.93	1.32759e-108	1.01208	Upregulated	SA-p vs SA
TRINITY_DN150_c1_g1_i1	9	5958	2.04379e-197	0.996979	Upregulated	SA-p vs SA
TRINITY_DN15005_c0_g1_i1	15	609	2.32481e-100	0.643868	Upregulated	SA-p vs SA
TRINITY_DN1501_c0_g5_i1	28	6406	1.42042e-200	0.862581	Upregulated	SA-p vs SA
TRINITY_DN1501_c0_g6_i1	1	22842	1.28687e-255	1.44491	Upregulated	SA-p vs SA
TRINITY_DN1501_c1_g1_i1	1	447	1.65735e-87	0.947303	Upregulated	SA-p vs SA
TRINITY_DN15036_c0_g1_i2	14	22.81	7.82344e-08	0.237107	Upregulated	SA-p vs SA
TRINITY_DN1513_c0_g1_i1	43	34180	3.93255e-265	1.02012	Upregulated	SA-p vs SA
TRINITY_DN15195_c0_g1_i1	1158	1	2.18169e-44	-0.716994	Downregulated	SA-p vs SA
TRINITY_DN152_c0_g1_i1	67046	12	3.33357e-186	-0.91607	Downregulated	SA-p vs SA
TRINITY_DN1521_c0_g2_i2	21	1	0.194536	-0.209758	Nonsignificant	SA-p vs SA
TRINITY_DN1525_c0_g1_i1	1014	3	8.74468e-38	-0.561228	Downregulated	SA-p vs SA
TRINITY_DN15285_c1_g1_i1	58	1	0.00190528	-0.338267	Downregulated	SA-p vs SA
TRINITY_DN153_c0_g1_i11	42.72	6	0.635239	-0.0729389	Nonsignificant	SA-p vs SA
TRINITY_DN153_c0_g1_i14	350.28	2	1.46529e-17	-0.478062	Downregulated	SA-p vs SA
TRINITY_DN153_c0_g1_i3	202	1	1.20784e-11	-0.496111	Downregulated	SA-p vs SA
TRINITY_DN1535_c0_g2_i1	11	11352	2.59246e-225	1.05314	Upregulated	SA-p vs SA
TRINITY_DN1541_c1_g1_i1	518	1	1.21418e-25	-0.615232	Downregulated	SA-p vs SA
TRINITY_DN1547_c0_g1_i1	314	5	8.23857e-13	-0.348325	Downregulated	SA-p vs SA
TRINITY_DN1550_c0_g1_i5	37	7	1	-0.035256	Nonsignificant	SA-p vs SA
TRINITY_DN1559_c0_g3_i1	1540	1	6.74213e-53	-0.753056	Downregulated	SA-p vs SA
TRINITY_DN156_c0_g3_i1	20.11	85041.4	1.1406377783e-312	1.23155	Upregulated	SA-p vs SA
TRINITY_DN156_c0_g3_i2	12.89	12829.6	1.28577e-230	1.04856	Upregulated	SA-p vs SA
TRINITY_DN156_c0_g3_i3	38	3903.03	1.61285e-175	0.761275	Upregulated	SA-p vs SA
TRINITY_DN156_c0_g5_i1	3	54955.1	1.03011e-293	1.41699	Upregulated	SA-p vs SA
TRINITY_DN1562_c0_g2_i1	171.15	1	4.8108e-10	-0.475147	Downregulated	SA-p vs SA
TRINITY_DN157_c0_g1_i3	268	1	2.59759e-15	-0.531873	Downregulated	SA-p vs SA
TRINITY_DN157_c0_g2_i3	3378.35	7	4.16162e-70	-0.606284	Downregulated	SA-p vs SA
TRINITY_DN1577_c0_g1_i1	28	1	0.0586286	-0.246148	Nonsignificant	SA-p vs SA
TRINITY_DN1590_c0_g1_i2	590.16	1	1.11531e-28	-0.631729	Downregulated	SA-p vs SA
TRINITY_DN1590_c0_g2_i1	733	259	0.00015565	0.0437643	Upregulated	SA-p vs SA
TRINITY_DN1591_c0_g1_i1	1311	13	2.35517e-34	-0.408238	Downregulated	SA-p vs SA
TRINITY_DN1593_c0_g4_i1	1	20131	3.88432e-250	1.42893	Upregulated	SA-p vs SA
TRINITY_DN1593_c0_g6_i1	64	9560	1.88773e-200	0.808652	Upregulated	SA-p vs SA
TRINITY_DN1593_c1_g1_i2	1	1961	1.44558e-149	1.13435	Upregulated	SA-p vs SA
TRINITY_DN1594_c0_g3_i1	2	2852	1.22522e-165	1.09405	Upregulated	SA-p vs SA
TRINITY_DN16093_c0_g1_i1	65	1	0.00057344	-0.35268	Downregulated	SA-p vs SA
TRINITY_DN161_c0_g1_i1	151540	18.22	3.15946e-216	-0.966397	Downregulated	SA-p vs SA
TRINITY_DN161_c0_g1_i3	36332.6	22.78	1.09715e-150	-0.75749	Downregulated	SA-p vs SA
TRINITY_DN162_c0_g1_i1	661.58	1	5.85497e-31	-0.64618	Downregulated	SA-p vs SA
TRINITY_DN162_c0_g1_i5	469.85	1	5.73585e-24	-0.602891	Downregulated	SA-p vs SA
TRINITY_DN16206_c0_g1_i1	25	193	2.75918e-56	0.433892	Upregulated	SA-p vs SA
TRINITY_DN16291_c0_g1_i1	189	1	3.03407e-11	-0.487696	Downregulated	SA-p vs SA
TRINITY_DN163_c0_g2_i1	641	1	3.52253e-30	-0.642182	Downregulated	SA-p vs SA
TRINITY_DN1630_c0_g2_i1	67	68431	7.25403e-285	1.05183	Upregulated	SA-p vs SA
TRINITY_DN16321_c0_g1_i1	487	4	2.08488e-20	-0.432066	Downregulated	SA-p vs SA
TRINITY_DN16352_c0_g1_i1	15	34	1.26833e-12	0.278872	Upregulated	SA-p vs SA
TRINITY_DN16376_c0_g1_i1	17	1	0.401742	-0.183028	Nonsignificant	SA-p vs SA
TRINITY_DN164_c0_g1_i4	2398.01	1	2.40717e-66	-0.809076	Downregulated	SA-p vs SA
TRINITY_DN1643_c0_g1_i1	327	1	3.0106e-18	-0.557042	Downregulated	SA-p vs SA
TRINITY_DN1646_c0_g1_i4	218923	358	3.51694e-145	-0.636226	Downregulated	SA-p vs SA
TRINITY_DN1646_c1_g1_i2	4176	5	6.18382e-80	-0.675658	Downregulated	SA-p vs SA
TRINITY_DN1649_c0_g1_i2	8	86.1	4.33762e-31	0.475921	Upregulated	SA-p vs SA
TRINITY_DN1650_c0_g1_i1	156	149052	6.84518e-295	1.04339	Upregulated	SA-p vs SA
TRINITY_DN1650_c0_g2_i1	8	3177	2.66509e-170	0.932338	Upregulated	SA-p vs SA
TRINITY_DN16513_c0_g1_i6	3465.56	1.59	1.34241e-77	-0.796996	Downregulated	SA-p vs SA
TRINITY_DN1652_c0_g1_i1	95.81	1	9.1596e-06	-0.401758	Downregulated	SA-p vs SA
TRINITY_DN1652_c0_g1_i3	1679.19	2	1.79596e-53	-0.676322	Downregulated	SA-p vs SA
TRINITY_DN16616_c0_g1_i6	299	1	9.55611e-17	-0.545719	Downregulated	SA-p vs SA
TRINITY_DN1668_c0_g2_i1	391	1	1.307e-20	-0.579653	Downregulated	SA-p vs SA
TRINITY_DN167_c0_g1_i1	621	1	2.18566e-29	-0.638173	Downregulated	SA-p vs SA
TRINITY_DN167_c0_g2_i2	637.93	1	4.3079e-30	-0.641575	Downregulated	SA-p vs SA
TRINITY_DN17_c0_g2_i3	433	12.09	1.32812e-12	-0.277286	Downregulated	SA-p vs SA
TRINITY_DN170_c1_g1_i1	81359.9	120	1.88831e-142	-0.649281	Downregulated	SA-p vs SA
TRINITY_DN171_c0_g1_i1	3420	4	2.10115e-74	-0.678622	Downregulated	SA-p vs SA
TRINITY_DN17111_c0_g2_i1	332	1	4.33104e-18	-0.558962	Downregulated	SA-p vs SA
TRINITY_DN17139_c0_g2_i1	228	1	2.34453e-13	-0.511426	Downregulated	SA-p vs SA
TRINITY_DN17139_c0_g3_i1	1716	5	3.89639e-50	-0.563159	Downregulated	SA-p vs SA
TRINITY_DN17139_c0_g3_i3	592	1	9.02819e-29	-0.632123	Downregulated	SA-p vs SA
TRINITY_DN17139_c1_g2_i1	475.51	1	2.81292e-24	-0.604406	Downregulated	SA-p vs SA
TRINITY_DN17150_c0_g1_i1	14.05	1	0.517394	-0.158919	Nonsignificant	SA-p vs SA
TRINITY_DN1717_c0_g1_i1	56	93	8.36967e-21	0.239524	Upregulated	SA-p vs SA
TRINITY_DN17198_c0_g1_i1	292	1	3.09211e-16	-0.542722	Downregulated	SA-p vs SA
TRINITY_DN172_c0_g1_i7	329.33	21	1.24369e-05	-0.172823	Downregulated	SA-p vs SA
TRINITY_DN172_c0_g1_i9	185.49	2	1.27256e-09	-0.397645	Downregulated	SA-p vs SA
TRINITY_DN1721_c0_g1_i1	1122.79	1	4.61023e-44	-0.713088	Downregulated	SA-p vs SA
TRINITY_DN17219_c0_g1_i1	13	7307	3.02077e-206	0.976281	Upregulated	SA-p vs SA
TRINITY_DN173_c0_g2_i1	4	44867	6.5362e-285	1.35495	Upregulated	SA-p vs SA
TRINITY_DN1735_c0_g1_i1	3612	5	6.20657e-75	-0.657305	Downregulated	SA-p vs SA
TRINITY_DN1743_c0_g2_i1	1471	2	1.09609e-49	-0.659578	Downregulated	SA-p vs SA
TRINITY_DN1746_c0_g1_i1	64	23045	1.53567e-238	0.919951	Upregulated	SA-p vs SA
TRINITY_DN1750_c0_g1_i3	340	1	1.88102e-18	-0.561974	Downregulated	SA-p vs SA
TRINITY_DN1760_c0_g1_i6	540.71	1	1.30016e-26	-0.62066	Downregulated	SA-p vs SA
TRINITY_DN17733_c0_g1_i1	506	1	1.3518e-25	-0.612267	Downregulated	SA-p vs SA
TRINITY_DN1775_c0_g1_i1	2030.21	1	4.66898e-61	-0.788014	Downregulated	SA-p vs SA
TRINITY_DN179_c0_g1_i6	86	1	2.54877e-05	-0.388094	Downregulated	SA-p vs SA
TRINITY_DN1792_c0_g1_i1	88	26500	1.08823e-236	0.897339	Upregulated	SA-p vs SA
TRINITY_DN1796_c0_g1_i2	41.63	5	0.41243	-0.0927323	Nonsignificant	SA-p vs SA
TRINITY_DN1799_c1_g1_i1	3421.1	4	1.98441e-74	-0.678663	Downregulated	SA-p vs SA
TRINITY_DN1799_c2_g2_i1	2548	3	3.31685e-65	-0.677781	Downregulated	SA-p vs SA
TRINITY_DN180_c0_g1_i1	7977	8	1.44864e-101	-0.698074	Downregulated	SA-p vs SA
TRINITY_DN180_c0_g4_i1	3844	1	1.15542e-82	-0.868766	Downregulated	SA-p vs SA
TRINITY_DN1801_c0_g1_i1	16278	4	2.26239e-135	-0.875977	Downregulated	SA-p vs SA
TRINITY_DN1802_c1_g1_i1	963.85	1	1.63112e-39	-0.693781	Downregulated	SA-p vs SA
TRINITY_DN1831_c1_g1_i1	3318	7	1.97236e-69	-0.604003	Downregulated	SA-p vs SA
TRINITY_DN1837_c0_g2_i1	2756.54	13.93	5.25459e-56	-0.493507	Downregulated	SA-p vs SA
TRINITY_DN1837_c0_g2_i2	1779.76	1.07	3.8279e-57	-0.762801	Downregulated	SA-p vs SA
TRINITY_DN184_c1_g2_i3	259.26	1	8.90397e-15	-0.527679	Downregulated	SA-p vs SA
TRINITY_DN1867_c0_g2_i1	6925.34	1.52	1.83446e-103	-0.890265	Downregulated	SA-p vs SA
TRINITY_DN1867_c0_g2_i2	61.66	1.48	0.000857787	-0.296416	Downregulated	SA-p vs SA
TRINITY_DN1867_c0_g3_i1	341	1	1.42632e-18	-0.562345	Downregulated	SA-p vs SA
TRINITY_DN18843_c0_g1_i1	20	19	4.17025e-05	0.168871	Upregulated	SA-p vs SA
TRINITY_DN19_c0_g1_i9	43.94	3	0.12358	-0.16418	Nonsignificant	SA-p vs SA
TRINITY_DN19_c1_g1_i14	141.13	2	1.65417e-07	-0.363072	Downregulated	SA-p vs SA
TRINITY_DN19_c9_g1_i1	2268	81	2.53241e-21	-0.246148	Downregulated	SA-p vs SA
TRINITY_DN191_c0_g2_i1	26393	14	9.38761e-145	-0.778641	Downregulated	SA-p vs SA
TRINITY_DN19132_c0_g2_i1	12	13	0.000672116	0.185484	Upregulated	SA-p vs SA
TRINITY_DN1917_c0_g1_i1	1	1867	1.83661e-147	1.12813	Upregulated	SA-p vs SA
TRINITY_DN1922_c0_g2_i1	2469.87	4	4.40118e-63	-0.637451	Downregulated	SA-p vs SA
TRINITY_DN1922_c0_g4_i1	3333	1	7.79147e-78	-0.850722	Downregulated	SA-p vs SA
TRINITY_DN193_c0_g1_i1	1202.84	4.76	6.03372e-40	-0.524436	Downregulated	SA-p vs SA
TRINITY_DN193_c0_g1_i13	959.68	1.6	9.54689e-38	-0.633779	Downregulated	SA-p vs SA
TRINITY_DN193_c0_g1_i9	3548.15	4.64	2.87803e-74	-0.664501	Downregulated	SA-p vs SA
TRINITY_DN194_c1_g1_i1	25	6592	8.29238e-202	0.880537	Upregulated	SA-p vs SA
TRINITY_DN194_c1_g2_i5	17	1962.86	1.13524e-149	0.776078	Upregulated	SA-p vs SA
TRINITY_DN1944_c0_g1_i1	5	2157	1.17412e-153	0.94281	Upregulated	SA-p vs SA
TRINITY_DN195_c0_g1_i2	480	1	1.75375e-24	-0.605595	Downregulated	SA-p vs SA
TRINITY_DN1954_c0_g8_i1	10	1722	4.83093e-144	0.82664	Upregulated	SA-p vs SA
TRINITY_DN1956_c0_g2_i1	329	3	1.61713e-15	-0.418845	Downregulated	SA-p vs SA
TRINITY_DN1956_c0_g4_i1	238	1	4.67721e-14	-0.516856	Downregulated	SA-p vs SA
TRINITY_DN19861_c0_g1_i1	1	57	1.35626e-21	0.686786	Upregulated	SA-p vs SA
TRINITY_DN1988_c0_g1_i1	1918	1	1.0689e-59	-0.780822	Downregulated	SA-p vs SA
TRINITY_DN1988_c1_g1_i1	814	1	7.1922e-36	-0.672406	Downregulated	SA-p vs SA
TRINITY_DN199_c1_g1_i1	290	1	4.1542e-16	-0.541853	Downregulated	SA-p vs SA
TRINITY_DN1990_c0_g1_i2	2517.01	2	2.28608e-66	-0.727522	Downregulated	SA-p vs SA
TRINITY_DN1990_c0_g1_i7	2.87978e+06	4975	7.32052e-147	-0.629282	Downregulated	SA-p vs SA
TRINITY_DN1992_c0_g1_i1	21	24	1.33121e-06	0.192251	Upregulated	SA-p vs SA
TRINITY_DN1992_c0_g1_i4	13	37	9.9007e-15	0.307669	Upregulated	SA-p vs SA
TRINITY_DN1996_c0_g1_i3	22.44	13.47	0.0120982	0.110799	Upregulated	SA-p vs SA
TRINITY_DN1996_c0_g1_i5	28.56	28.53	6.09387e-07	0.175226	Upregulated	SA-p vs SA
TRINITY_DN1996_c1_g1_i2	53	61	1.40211e-12	0.193142	Upregulated	SA-p vs SA
TRINITY_DN2_c0_g1_i1	6185.57	11	2.08962e-88	-0.625618	Downregulated	SA-p vs SA
TRINITY_DN2_c0_g4_i1	2205	1	5.99426e-64	-0.798461	Downregulated	SA-p vs SA
TRINITY_DN2_c0_g5_i1	41615.4	16	3.70978e-162	-0.819353	Downregulated	SA-p vs SA
TRINITY_DN2007_c2_g1_i1	217	1	1.19683e-12	-0.505171	Downregulated	SA-p vs SA
TRINITY_DN201_c0_g3_i1	152	1	4.03391e-09	-0.460137	Downregulated	SA-p vs SA
TRINITY_DN20118_c0_g3_i2	1	12831	1.30339e-230	1.37196	Upregulated	SA-p vs SA
TRINITY_DN2019_c0_g1_i2	43	5	0.41243	-0.0968281	Nonsignificant	SA-p vs SA
TRINITY_DN2025_c0_g2_i1	50230	56	1.2521e-144	-0.684683	Downregulated	SA-p vs SA
TRINITY_DN2025_c1_g2_i1	159	1	1.37065e-09	-0.465832	Downregulated	SA-p vs SA
TRINITY_DN203_c0_g2_i3	73.9	1	7.45732e-05	-0.368913	Downregulated	SA-p vs SA
TRINITY_DN20307_c0_g2_i1	34	16755	3.42679e-240	0.959641	Upregulated	SA-p vs SA
TRINITY_DN2042_c0_g1_i2	1370.35	6.18	4.28377e-42	-0.507905	Downregulated	SA-p vs SA
TRINITY_DN2042_c0_g1_i3	1316.65	1.82	1.00607e-46	-0.657486	Downregulated	SA-p vs SA
TRINITY_DN2042_c0_g3_i1	3540	3	9.56644e-77	-0.719375	Downregulated	SA-p vs SA
TRINITY_DN2042_c1_g1_i2	1463.04	2.63	6.61205e-48	-0.624253	Downregulated	SA-p vs SA
TRINITY_DN2042_c1_g1_i3	1775.32	3.37	1.02771e-53	-0.617363	Downregulated	SA-p vs SA
TRINITY_DN2045_c0_g2_i1	2595	1	3.38308e-69	-0.819062	Downregulated	SA-p vs SA
TRINITY_DN205_c0_g1_i1	1	360	7.74103e-79	0.919923	Upregulated	SA-p vs SA
TRINITY_DN205_c0_g3_i1	21	833.05	1.98565e-113	0.640934	Upregulated	SA-p vs SA
TRINITY_DN20577_c0_g1_i2	26	5	1	-0.0331879	Nonsignificant	SA-p vs SA
TRINITY_DN207_c0_g1_i1	698	2	3.68117e-30	-0.565279	Downregulated	SA-p vs SA
TRINITY_DN208_c0_g1_i4	62	1	0.000857787	-0.346703	Downregulated	SA-p vs SA
TRINITY_DN20825_c0_g5_i1	24	3244	3.11547e-171	0.796009	Upregulated	SA-p vs SA
TRINITY_DN2087_c0_g2_i1	184	1	6.03101e-11	-0.484305	Downregulated	SA-p vs SA
TRINITY_DN2098_c0_g1_i2	436.74	1	6.28123e-23	-0.593647	Downregulated	SA-p vs SA
TRINITY_DN2098_c0_g1_i4	4924.6	1	3.00787e-92	-0.900102	Downregulated	SA-p vs SA
TRINITY_DN21_c0_g1_i6	2033	1	4.26991e-61	-0.788188	Downregulated	SA-p vs SA
TRINITY_DN210_c0_g1_i2	674	73	0.00237953	-0.10581	Downregulated	SA-p vs SA
TRINITY_DN210_c0_g2_i1	512	2	8.28855e-24	-0.526079	Downregulated	SA-p vs SA
TRINITY_DN2114_c0_g1_i2	362	0.5	5.82322e-22	-0.657585	Downregulated	SA-p vs SA
TRINITY_DN21196_c0_g2_i1	298	2	3.59921e-15	-0.457616	Downregulated	SA-p vs SA
TRINITY_DN212_c1_g1_i10	30	2	0.211789	-0.167196	Nonsignificant	SA-p vs SA
TRINITY_DN212_c1_g1_i8	221	1	6.22166e-13	-0.507482	Downregulated	SA-p vs SA
TRINITY_DN212_c1_g1_i9	26	5	1	-0.0331879	Nonsignificant	SA-p vs SA
TRINITY_DN212_c1_g2_i2	515.32	3.6	1.25777e-21	-0.452544	Downregulated	SA-p vs SA
TRINITY_DN212_c1_g2_i4	15.17	2.4	0.780907	-0.0578788	Nonsignificant	SA-p vs SA
TRINITY_DN21214_c1_g1_i1	2	2782	1.4352e-164	1.0909	Upregulated	SA-p vs SA
TRINITY_DN2125_c0_g3_i1	17	17485	4.92192e-244	1.05272	Upregulated	SA-p vs SA
TRINITY_DN21296_c0_g5_i1	16	1784	1.37666e-145	0.771661	Upregulated	SA-p vs SA
TRINITY_DN2132_c0_g2_i2	842.53	1	2.84944e-36	-0.676764	Downregulated	SA-p vs SA
TRINITY_DN2132_c0_g6_i1	1192	1	2.49726e-45	-0.720655	Downregulated	SA-p vs SA
TRINITY_DN2132_c0_g7_i1	2748	6	5.59542e-64	-0.59966	Downregulated	SA-p vs SA
TRINITY_DN21343_c0_g1_i2	137	5	6.51406e-05	-0.243408	Downregulated	SA-p vs SA
TRINITY_DN2147_c0_g2_i4	509.12	1	8.53705e-26	-0.613045	Downregulated	SA-p vs SA
TRINITY_DN2148_c0_g1_i1	1	14439	9.96752e-236	1.38689	Upregulated	SA-p vs SA
TRINITY_DN215_c0_g1_i3	29	7313	2.66538e-206	0.874892	Upregulated	SA-p vs SA
TRINITY_DN2150_c1_g3_i1	14388	14	2.49883e-119	-0.701896	Downregulated	SA-p vs SA
TRINITY_DN2153_c0_g2_i1	451	1	5.00038e-23	-0.597712	Downregulated	SA-p vs SA
TRINITY_DN216_c0_g1_i10	18957	79	1.93229e-94	-0.517895	Downregulated	SA-p vs SA
TRINITY_DN217_c0_g2_i1	23	4194	2.72967e-182	0.833883	Upregulated	SA-p vs SA
TRINITY_DN2173_c0_g1_i6	3324.49	19	1.51456e-58	-0.477942	Downregulated	SA-p vs SA
TRINITY_DN219_c0_g3_i1	7	4397	2.70782e-184	0.990338	Upregulated	SA-p vs SA
TRINITY_DN22_c0_g1_i3	10	9264.26	1.64659e-216	1.03949	Upregulated	SA-p vs SA
TRINITY_DN2209_c0_g1_i1	30	54	1.52741e-15	0.249712	Upregulated	SA-p vs SA
TRINITY_DN221_c0_g1_i8	26	1	0.0884894	-0.236774	Nonsignificant	SA-p vs SA
TRINITY_DN222_c0_g1_i4	29	1.1	0.11103	-0.238531	Nonsignificant	SA-p vs SA
TRINITY_DN222_c0_g1_i5	16	1.05	0.355755	-0.169188	Nonsignificant	SA-p vs SA
TRINITY_DN226_c0_g1_i12	14690.3	2	8.15513e-134	-0.950675	Downregulated	SA-p vs SA
TRINITY_DN226_c0_g1_i18	22855.8	1	1.3488e-153	-1.09427	Downregulated	SA-p vs SA
TRINITY_DN226_c0_g2_i3	222.79	1	4.49065e-13	-0.508502	Downregulated	SA-p vs SA
TRINITY_DN226_c0_g2_i5	110.68	12	0.1128	-0.105679	Nonsignificant	SA-p vs SA
TRINITY_DN227_c0_g1_i2	73	7	0.106845	-0.121215	Nonsignificant	SA-p vs SA
TRINITY_DN227_c0_g1_i3	67	3	0.00660661	-0.217545	Downregulated	SA-p vs SA
TRINITY_DN2270_c0_g1_i1	13104	11	2.56927e-118	-0.720578	Downregulated	SA-p vs SA
TRINITY_DN228_c0_g1_i1	289	2	1.11799e-14	-0.453736	Downregulated	SA-p vs SA
TRINITY_DN229_c0_g1_i2	735	4	1.17672e-28	-0.484133	Downregulated	SA-p vs SA
TRINITY_DN229_c0_g2_i3	82	2	0.000296643	-0.294389	Downregulated	SA-p vs SA
TRINITY_DN229_c0_g2_i5	68	19	0.299181	0.0140694	Nonsignificant	SA-p vs SA
TRINITY_DN229_c0_g2_i8	54	2	0.00841274	-0.241548	Downregulated	SA-p vs SA
TRINITY_DN229_c2_g1_i1	74	1	7.45732e-05	-0.369084	Downregulated	SA-p vs SA
TRINITY_DN2292_c0_g1_i1	311	1	2.23594e-17	-0.550696	Downregulated	SA-p vs SA
TRINITY_DN2298_c3_g2_i1	2	4857	1.40279e-188	1.16139	Upregulated	SA-p vs SA
TRINITY_DN23_c0_g1_i1	1	1119.02	1.14279e-125	1.06338	Upregulated	SA-p vs SA
TRINITY_DN230_c0_g4_i4	18253.5	2	2.2938e-142	-0.978146	Downregulated	SA-p vs SA
TRINITY_DN2301_c0_g1_i1	26	10096	3.02177e-220	0.929498	Upregulated	SA-p vs SA
TRINITY_DN232_c0_g5_i1	1.13	7974.42	5.20302e-210	1.29633	Upregulated	SA-p vs SA
TRINITY_DN232_c0_g5_i2	24.87	12385.6	4.24584e-229	0.960974	Upregulated	SA-p vs SA
TRINITY_DN2325_c0_g1_i1	446	1	8.13729e-23	-0.596301	Downregulated	SA-p vs SA
TRINITY_DN2339_c0_g2_i1	912	1	1.67871e-38	-0.686786	Downregulated	SA-p vs SA
TRINITY_DN234_c0_g1_i1	92.74	0.5	1.55011e-07	-0.485318	Downregulated	SA-p vs SA
TRINITY_DN234_c0_g1_i2	69.26	0.5	6.16451e-06	-0.44839	Downregulated	SA-p vs SA
TRINITY_DN2344_c0_g1_i2	160	1	9.57528e-10	-0.466625	Downregulated	SA-p vs SA
TRINITY_DN2344_c0_g2_i4	1005.55	2	3.96676e-39	-0.611458	Downregulated	SA-p vs SA
TRINITY_DN2344_c0_g3_i1	1635	1	2.7087e-54	-0.760629	Downregulated	SA-p vs SA
TRINITY_DN2346_c0_g1_i1	733	1	4.65495e-33	-0.659147	Downregulated	SA-p vs SA
TRINITY_DN2356_c0_g2_i1	92	1	7.6953e-06	-0.396625	Downregulated	SA-p vs SA
TRINITY_DN2356_c0_g3_i1	141.69	1.87	1.65417e-07	-0.372074	Downregulated	SA-p vs SA
TRINITY_DN2356_c0_g3_i2	1905.31	0.13	2.75696e-61	-1.03806	Downregulated	SA-p vs SA
TRINITY_DN2356_c0_g4_i1	99	1	6.22296e-06	-0.405901	Downregulated	SA-p vs SA
TRINITY_DN2357_c2_g1_i1	245	1	5.77237e-14	-0.520523	Downregulated	SA-p vs SA
TRINITY_DN236_c0_g1_i1	402.23	9.5	1.07904e-12	-0.298458	Downregulated	SA-p vs SA
TRINITY_DN236_c0_g1_i6	2835.81	9.5	9.00757e-61	-0.54551	Downregulated	SA-p vs SA
TRINITY_DN2368_c1_g2_i1	779	1	1.01628e-34	-0.666847	Downregulated	SA-p vs SA
TRINITY_DN237_c1_g3_i1	222	3	9.83617e-11	-0.369084	Downregulated	SA-p vs SA
TRINITY_DN2372_c0_g2_i1	36	1	0.0231566	-0.277938	Downregulated	SA-p vs SA
TRINITY_DN238_c0_g2_i2	19	5963.67	1.79201e-197	0.90258	Upregulated	SA-p vs SA
TRINITY_DN2383_c1_g1_i2	2010.54	1	9.56956e-61	-0.786783	Downregulated	SA-p vs SA
TRINITY_DN2383_c2_g1_i3	586	1	1.70424e-28	-0.630835	Downregulated	SA-p vs SA
TRINITY_DN23890_c0_g1_i1	1	540	3.11282e-95	0.971212	Upregulated	SA-p vs SA
TRINITY_DN240_c0_g1_i1	177	1	1.69856e-10	-0.479398	Downregulated	SA-p vs SA
TRINITY_DN240_c0_g2_i10	1237.59	3	3.11609e-43	-0.586433	Downregulated	SA-p vs SA
TRINITY_DN240_c0_g2_i8	1793.21	9	7.87074e-47	-0.494374	Downregulated	SA-p vs SA
TRINITY_DN241_c0_g1_i1	523.14	1.29	7.738e-26	-0.58427	Downregulated	SA-p vs SA
TRINITY_DN241_c0_g1_i3	774.5	1	1.45413e-34	-0.666114	Downregulated	SA-p vs SA
TRINITY_DN24168_c0_g6_i1	46	40602	2.35026e-271	1.03337	Upregulated	SA-p vs SA
TRINITY_DN242_c0_g2_i3	138	8	0.00122608	-0.184875	Downregulated	SA-p vs SA
TRINITY_DN242_c0_g3_i1	90	4	0.00191784	-0.218485	Downregulated	SA-p vs SA
TRINITY_DN243_c0_g1_i5	216.11	39.8	0.916387	-0.0386603	Nonsignificant	SA-p vs SA
TRINITY_DN243_c0_g1_i6	241.79	14.64	7.89695e-05	-0.179372	Downregulated	SA-p vs SA
TRINITY_DN243_c0_g1_i7	147.1	18.55	0.175256	-0.0865669	Nonsignificant	SA-p vs SA
TRINITY_DN2435_c0_g1_i2	2802	3	1.21867e-68	-0.689801	Downregulated	SA-p vs SA
TRINITY_DN245_c1_g1_i1	41	1745	3.82722e-138	0.649835	Upregulated	SA-p vs SA
TRINITY_DN246_c1_g1_i9	24.1	2	0.352234	-0.139495	Nonsignificant	SA-p vs SA
TRINITY_DN247_c0_g1_i1	937	4	1.29518e-34	-0.514847	Downregulated	SA-p vs SA
TRINITY_DN2472_c0_g1_i1	5279	3	1.41029e-91	-0.769924	Downregulated	SA-p vs SA
TRINITY_DN2473_c0_g2_i4	157.33	3	2.02823e-07	-0.325528	Downregulated	SA-p vs SA
TRINITY_DN2473_c0_g2_i7	642	1	3.52253e-30	-0.64238	Downregulated	SA-p vs SA
TRINITY_DN248_c2_g1_i12	42	3	0.163583	-0.158469	Nonsignificant	SA-p vs SA
TRINITY_DN248_c2_g1_i14	16	1	0.355755	-0.17536	Nonsignificant	SA-p vs SA
TRINITY_DN2485_c0_g1_i3	12128	7.08	1.31889e-119	-0.766523	Downregulated	SA-p vs SA
TRINITY_DN2485_c0_g1_i9	6611.81	1.92	1.31355e-101	-0.854853	Downregulated	SA-p vs SA
TRINITY_DN2485_c1_g1_i1	657	1	8.70105e-31	-0.645301	Downregulated	SA-p vs SA
TRINITY_DN24941_c0_g1_i1	13	10	0.00664724	0.142172	Upregulated	SA-p vs SA
TRINITY_DN25_c0_g1_i10	12	2591.7	1.46752e-161	0.855292	Upregulated	SA-p vs SA
TRINITY_DN25_c0_g1_i11	13.96	4716.09	2.50079e-187	0.911882	Upregulated	SA-p vs SA
TRINITY_DN25_c0_g1_i6	3.04	9343.64	7.08022e-217	1.19119	Upregulated	SA-p vs SA
TRINITY_DN25_c0_g2_i1	2	7724.35	1.23481e-208	1.22008	Upregulated	SA-p vs SA
TRINITY_DN251_c0_g1_i2	46	4	0.195974	-0.133586	Nonsignificant	SA-p vs SA
TRINITY_DN2529_c0_g1_i1	81	2	0.000296643	-0.292837	Downregulated	SA-p vs SA
TRINITY_DN25368_c0_g1_i1	12	2	1	-0.0512894	Nonsignificant	SA-p vs SA
TRINITY_DN25381_c0_g1_i1	7	5741.98	8.08069e-196	1.0241	Upregulated	SA-p vs SA
TRINITY_DN25381_c0_g3_i2	8	2350.9	2.31002e-157	0.894246	Upregulated	SA-p vs SA
TRINITY_DN254_c0_g1_i2	50	1	0.00429585	-0.319492	Downregulated	SA-p vs SA
TRINITY_DN25407_c0_g1_i1	38	38	1.60135e-08	0.175359	Upregulated	SA-p vs SA
TRINITY_DN2542_c1_g1_i3	42.09	3	0.163583	-0.158739	Nonsignificant	SA-p vs SA
TRINITY_DN2546_c0_g1_i1	7551.53	34.45	1.44129e-78	-0.506449	Downregulated	SA-p vs SA
TRINITY_DN2546_c0_g1_i12	12211	12.55	2.37017e-113	-0.694975	Downregulated	SA-p vs SA
TRINITY_DN2546_c0_g2_i1	518	1	1.21418e-25	-0.615232	Downregulated	SA-p vs SA
TRINITY_DN255_c0_g1_i3	31	1	0.0760833	-0.259023	Nonsignificant	SA-p vs SA
TRINITY_DN255_c0_g1_i4	2289	34	2.96437e-37	-0.357123	Downregulated	SA-p vs SA
TRINITY_DN2554_c0_g1_i1	560	1	1.80927e-27	-0.625094	Downregulated	SA-p vs SA
TRINITY_DN256_c0_g5_i1	17	16158	1.30124e-240	1.04273	Upregulated	SA-p vs SA
TRINITY_DN2561_c1_g2_i1	27	3	0.523805	-0.102579	Nonsignificant	SA-p vs SA
TRINITY_DN2574_c0_g1_i1	1887.32	1.74	2.07517e-57	-0.708719	Downregulated	SA-p vs SA
TRINITY_DN2574_c0_g1_i2	93.68	0.26	1.55011e-07	-0.569312	Downregulated	SA-p vs SA
TRINITY_DN2574_c0_g3_i2	358	1	2.09257e-19	-0.568499	Downregulated	SA-p vs SA
TRINITY_DN2574_c0_g4_i1	7178	19	8.343e-87	-0.575306	Downregulated	SA-p vs SA
TRINITY_DN259_c0_g2_i1	5154	5	4.7382e-88	-0.702275	Downregulated	SA-p vs SA
TRINITY_DN2598_c0_g1_i1	549.27	1	5.3877e-27	-0.622647	Downregulated	SA-p vs SA
TRINITY_DN26_c0_g1_i1	21	14592	3.38459e-236	1.00311	Upregulated	SA-p vs SA
TRINITY_DN26_c0_g2_i11	10	3544.76	5.16327e-175	0.917967	Upregulated	SA-p vs SA
TRINITY_DN26_c0_g2_i7	67.98	96071.5	9.89198e-299	1.09291	Upregulated	SA-p vs SA
TRINITY_DN26_c0_g2_i8	1.02	1952.19	2.29674e-149	1.13127	Upregulated	SA-p vs SA
TRINITY_DN260_c0_g1_i1	19346.4	6.54	1.29705e-138	-0.835631	Downregulated	SA-p vs SA
TRINITY_DN260_c0_g1_i3	2091.97	2.23	2.16579e-60	-0.690356	Downregulated	SA-p vs SA
TRINITY_DN260_c0_g1_i4	1711.61	2.23	3.87076e-54	-0.664972	Downregulated	SA-p vs SA
TRINITY_DN260_c0_g2_i1	1191	2	1.32209e-43	-0.632869	Downregulated	SA-p vs SA
TRINITY_DN2606_c0_g2_i2	60.02	1	0.00128011	-0.342597	Downregulated	SA-p vs SA
TRINITY_DN26074_c0_g1_i1	20	14125	8.68565e-235	1.00516	Upregulated	SA-p vs SA
TRINITY_DN261_c0_g2_i1	353	1	3.60962e-19	-0.56672	Downregulated	SA-p vs SA
TRINITY_DN261_c0_g3_i1	6919.71	10.47	1.12106e-93	-0.646051	Downregulated	SA-p vs SA
TRINITY_DN2610_c0_g1_i2	99.28	1	6.22296e-06	-0.406258	Downregulated	SA-p vs SA
TRINITY_DN26102_c0_g1_i1	23	7575	8.18885e-208	0.908666	Upregulated	SA-p vs SA
TRINITY_DN26136_c0_g1_i1	17	4206	2.12974e-182	0.872481	Upregulated	SA-p vs SA
TRINITY_DN2617_c0_g3_i1	5	729	1.03626e-107	0.805588	Upregulated	SA-p vs SA
TRINITY_DN262_c0_g11_i1	1	1934	5.70666e-149	1.13259	Upregulated	SA-p vs SA
TRINITY_DN262_c0_g2_i3	1	4020.58	1.97922e-180	1.22517	Upregulated	SA-p vs SA
TRINITY_DN262_c0_g5_i1	1	10767	5.18085e-223	1.34977	Upregulated	SA-p vs SA
TRINITY_DN262_c0_g7_i1	1	35612	6.95523e-275	1.50108	Upregulated	SA-p vs SA
TRINITY_DN26221_c0_g1_i1	10	2365	1.28503e-157	0.866775	Upregulated	SA-p vs SA
TRINITY_DN2623_c0_g1_i2	146.59	1	8.3061e-09	-0.455553	Downregulated	SA-p vs SA
TRINITY_DN2623_c0_g1_i4	673.78	4	6.74301e-27	-0.473132	Downregulated	SA-p vs SA
TRINITY_DN26236_c0_g1_i1	1	226	6.07067e-61	0.861031	Upregulated	SA-p vs SA
TRINITY_DN26241_c0_g1_i1	57	19890	5.66035e-235	0.915979	Upregulated	SA-p vs SA
TRINITY_DN26284_c0_g1_i1	1	5388	4.64749e-193	1.2622	Upregulated	SA-p vs SA
TRINITY_DN263_c1_g2_i3	3086.36	2.55	3.5205e-72	-0.722586	Downregulated	SA-p vs SA
TRINITY_DN263_c1_g2_i4	111.39	0.45	4.53328e-09	-0.521824	Downregulated	SA-p vs SA
TRINITY_DN26343_c0_g1_i1	25	2503	4.15272e-160	0.758043	Upregulated	SA-p vs SA
TRINITY_DN26370_c0_g1_i4	11	504.76	1.18077e-92	0.659354	Upregulated	SA-p vs SA
TRINITY_DN2638_c0_g1_i1	23	5479	8.10786e-194	0.867691	Upregulated	SA-p vs SA
TRINITY_DN26392_c0_g1_i1	2879	4	4.71103e-68	-0.65684	Downregulated	SA-p vs SA
TRINITY_DN26456_c0_g1_i1	1	5277	3.69648e-192	1.25956	Upregulated	SA-p vs SA
TRINITY_DN26497_c0_g1_i1	345	1	1.08222e-18	-0.563821	Downregulated	SA-p vs SA
TRINITY_DN26522_c0_g1_i1	12	7	0.0586286	0.107179	Nonsignificant	SA-p vs SA
TRINITY_DN266_c0_g2_i2	1093.66	2	1.38252e-41	-0.622083	Downregulated	SA-p vs SA
TRINITY_DN26605_c0_g1_i1	1	7359	1.54318e-206	1.30163	Upregulated	SA-p vs SA
TRINITY_DN2666_c0_g1_i1	8134.84	14	4.41651e-96	-0.629764	Downregulated	SA-p vs SA
TRINITY_DN26683_c0_g1_i1	4	5328	1.39169e-192	1.08542	Upregulated	SA-p vs SA
TRINITY_DN267_c0_g1_i4	106	1	1.32245e-06	-0.414543	Downregulated	SA-p vs SA
TRINITY_DN267_c0_g1_i8	61	3	0.0174197	-0.205677	Downregulated	SA-p vs SA
TRINITY_DN267_c2_g1_i1	15	1	0.355755	-0.167196	Nonsignificant	SA-p vs SA
TRINITY_DN26739_c0_g1_i1	10	6796	4.18273e-203	1.0003	Upregulated	SA-p vs SA
TRINITY_DN2674_c1_g1_i1	1172	2	3.84772e-43	-0.630835	Downregulated	SA-p vs SA
TRINITY_DN26969_c0_g1_i1	774	57	7.90897e-07	-0.154606	Downregulated	SA-p vs SA
TRINITY_DN26972_c0_g1_i1	96	1	9.1596e-06	-0.402008	Downregulated	SA-p vs SA
TRINITY_DN270_c0_g1_i2	1350	8	1.43974e-39	-0.473361	Downregulated	SA-p vs SA
TRINITY_DN27019_c0_g1_i1	11	16	2.84737e-05	0.222756	Upregulated	SA-p vs SA
TRINITY_DN2708_c0_g1_i1	78	1	8.39027e-05	-0.375743	Downregulated	SA-p vs SA
TRINITY_DN272_c0_g1_i2	15088.6	9.12	2.36625e-126	-0.762125	Downregulated	SA-p vs SA
TRINITY_DN272_c0_g1_i4	2817.41	6.88	6.05511e-64	-0.585503	Downregulated	SA-p vs SA
TRINITY_DN274_c0_g2_i1	8462	3	6.36841e-110	-0.82961	Downregulated	SA-p vs SA
TRINITY_DN2746_c0_g3_i1	7685.9	6	1.96957e-102	-0.729762	Downregulated	SA-p vs SA
TRINITY_DN2752_c0_g1_i2	1417.1	5	1.73058e-44	-0.53895	Downregulated	SA-p vs SA
TRINITY_DN2758_c0_g1_i1	143.4	1	1.71346e-08	-0.45277	Downregulated	SA-p vs SA
TRINITY_DN2758_c0_g2_i1	1067	5	1.81102e-36	-0.503055	Downregulated	SA-p vs SA
TRINITY_DN276_c0_g1_i3	443.15	2.68	2.88148e-20	-0.470789	Downregulated	SA-p vs SA
TRINITY_DN276_c0_g1_i6	388.37	11.11	1.55485e-11	-0.274219	Downregulated	SA-p vs SA
TRINITY_DN276_c0_g1_i7	3344.51	1.2	5.80199e-78	-0.828095	Downregulated	SA-p vs SA
TRINITY_DN276_c0_g2_i1	65	1	0.00057344	-0.35268	Downregulated	SA-p vs SA
TRINITY_DN2765_c0_g1_i2	19	3	1	-0.0581287	Nonsignificant	SA-p vs SA
TRINITY_DN2766_c0_g1_i1	2393	1	2.81394e-66	-0.808811	Downregulated	SA-p vs SA
TRINITY_DN277_c0_g1_i3	2357.67	4	2.01793e-61	-0.63157	Downregulated	SA-p vs SA
TRINITY_DN277_c0_g1_i5	88.26	3	0.000820646	-0.252406	Downregulated	SA-p vs SA
TRINITY_DN278_c1_g1_i5	106.34	2	2.69074e-05	-0.327268	Downregulated	SA-p vs SA
TRINITY_DN2782_c0_g1_i1	877	1	1.9503e-37	-0.681836	Downregulated	SA-p vs SA
TRINITY_DN279_c0_g1_i5	733.18	3	5.85649e-30	-0.520209	Downregulated	SA-p vs SA
TRINITY_DN28_c0_g1_i1	86	5067.64	6.17698e-166	0.69099	Upregulated	SA-p vs SA
TRINITY_DN280_c0_g1_i1	235	1.26	8.89311e-14	-0.486017	Downregulated	SA-p vs SA
TRINITY_DN280_c0_g2_i2	248.89	2	1.03903e-12	-0.434836	Downregulated	SA-p vs SA
TRINITY_DN280_c0_g2_i4	2334.68	1	5.67658e-66	-0.80569	Downregulated	SA-p vs SA
TRINITY_DN281_c1_g1_i1	1807.63	8.22	2.73377e-48	-0.506854	Downregulated	SA-p vs SA
TRINITY_DN281_c1_g1_i7	4430.53	0.78	4.03831e-88	-0.918158	Downregulated	SA-p vs SA
TRINITY_DN285_c0_g1_i3	2643.79	1	7.37728e-70	-0.821418	Downregulated	SA-p vs SA
TRINITY_DN285_c0_g1_i9	120.98	3	2.32146e-05	-0.292295	Downregulated	SA-p vs SA
TRINITY_DN28659_c0_g1_i1	51	1	0.00285251	-0.321997	Downregulated	SA-p vs SA
TRINITY_DN288_c0_g1_i1	327	2	9.64974e-17	-0.469363	Downregulated	SA-p vs SA
TRINITY_DN289_c0_g1_i1	24	16126	1.57258e-240	0.99886	Upregulated	SA-p vs SA
TRINITY_DN29_c0_g2_i1	1	20976	6.3964e-252	1.43413	Upregulated	SA-p vs SA
TRINITY_DN290_c1_g1_i1	545	41	8.02823e-06	-0.151911	Downregulated	SA-p vs SA
TRINITY_DN2907_c0_g2_i1	214	1	1.66172e-12	-0.50341	Downregulated	SA-p vs SA
TRINITY_DN292_c0_g1_i13	777.71	8.52	2.96841e-25	-0.395632	Downregulated	SA-p vs SA
TRINITY_DN292_c0_g1_i16	4185	3	4.25325e-83	-0.740548	Downregulated	SA-p vs SA
TRINITY_DN292_c0_g1_i23	5289.99	6	1.30053e-87	-0.682507	Downregulated	SA-p vs SA
TRINITY_DN292_c0_g1_i4	29565	2.48	8.47487e-163	-1.01194	Downregulated	SA-p vs SA
TRINITY_DN292_c0_g2_i1	557	1	2.79569e-27	-0.624414	Downregulated	SA-p vs SA
TRINITY_DN2975_c0_g1_i1	205	1	8.66359e-12	-0.497975	Downregulated	SA-p vs SA
TRINITY_DN298_c0_g1_i2	12043.7	39	5.17163e-94	-0.549804	Downregulated	SA-p vs SA
TRINITY_DN298_c0_g1_i3	217.46	2	2.79492e-11	-0.41776	Downregulated	SA-p vs SA
TRINITY_DN298_c0_g1_i5	329.8	1	5.72638e-18	-0.558121	Downregulated	SA-p vs SA
TRINITY_DN298_c0_g2_i3	1478.3	2	7.78965e-50	-0.660204	Downregulated	SA-p vs SA
TRINITY_DN298_c0_g3_i2	1015	0.5	1.8783e-43	-0.788001	Downregulated	SA-p vs SA
TRINITY_DN2981_c0_g1_i5	19688	72	1.53186e-98	-0.534417	Downregulated	SA-p vs SA
TRINITY_DN299_c0_g1_i4	71.23	1	0.00016937	-0.364258	Downregulated	SA-p vs SA
TRINITY_DN29916_c0_g1_i1	16	1	0.355755	-0.17536	Nonsignificant	SA-p vs SA
TRINITY_DN2997_c0_g1_i1	519	1	1.21418e-25	-0.615476	Downregulated	SA-p vs SA
TRINITY_DN3_c0_g1_i2	586.89	0.5	5.46374e-31	-0.718706	Downregulated	SA-p vs SA
TRINITY_DN3_c0_g1_i22	40.13	0.5	0.00041343	-0.379356	Downregulated	SA-p vs SA
TRINITY_DN300_c0_g2_i1	1240	4	8.11979e-42	-0.550289	Downregulated	SA-p vs SA
TRINITY_DN300_c0_g4_i1	50	1	0.00429585	-0.319492	Downregulated	SA-p vs SA
TRINITY_DN3000_c0_g1_i1	20	18417	2.75049e-246	1.03873	Upregulated	SA-p vs SA
TRINITY_DN3001_c0_g2_i1	355	2	8.63017e-18	-0.479755	Downregulated	SA-p vs SA
TRINITY_DN301_c0_g2_i4	249.71	3	5.24496e-12	-0.383963	Downregulated	SA-p vs SA
TRINITY_DN3022_c0_g2_i2	24.32	0.76	0.13207	-0.263039	Nonsignificant	SA-p vs SA
TRINITY_DN3022_c0_g2_i3	1583.68	1.24	8.34617e-54	-0.729384	Downregulated	SA-p vs SA
TRINITY_DN303_c0_g1_i16	83	3	0.000844689	-0.244633	Downregulated	SA-p vs SA
TRINITY_DN303_c0_g1_i7	1672.06	6	6.087e-48	-0.536815	Downregulated	SA-p vs SA
TRINITY_DN30335_c0_g1_i1	19	2	0.620334	-0.109418	Nonsignificant	SA-p vs SA
TRINITY_DN304_c0_g1_i1	283.98	11	6.48875e-08	-0.235877	Downregulated	SA-p vs SA
TRINITY_DN306_c0_g1_i2	17523	53982	1.45698e-67	0.317684	Upregulated	SA-p vs SA
TRINITY_DN307_c0_g1_i1	591	1	9.02819e-29	-0.631909	Downregulated	SA-p vs SA
TRINITY_DN309_c0_g2_i3	718.72	1	1.42499e-32	-0.656659	Downregulated	SA-p vs SA
TRINITY_DN30911_c0_g1_i1	24	28	1.50047e-07	0.194859	Upregulated	SA-p vs SA
TRINITY_DN3092_c0_g1_i3	645	1	2.3579e-30	-0.642969	Downregulated	SA-p vs SA
TRINITY_DN3092_c0_g2_i1	1333	3	1.64977e-45	-0.595828	Downregulated	SA-p vs SA
TRINITY_DN30925_c0_g1_i1	1	163	2.27749e-49	0.819694	Upregulated	SA-p vs SA
TRINITY_DN30926_c0_g1_i1	24	4870	9.89769e-189	0.847402	Upregulated	SA-p vs SA
TRINITY_DN30941_c0_g1_i1	39	12383	7.45737e-224	0.904037	Upregulated	SA-p vs SA
TRINITY_DN30952_c0_g1_i1	3	14975	2.61287e-237	1.25253	Upregulated	SA-p vs SA
TRINITY_DN3096_c0_g2_i3	42.44	1	0.0143062	-0.298756	Downregulated	SA-p vs SA
TRINITY_DN30971_c0_g1_i1	7	1850	4.33117e-147	0.880827	Upregulated	SA-p vs SA
TRINITY_DN30981_c0_g1_i1	1	10969	8.10082e-224	1.35212	Upregulated	SA-p vs SA
TRINITY_DN30994_c0_g1_i1	54	2	0.00841274	-0.241548	Downregulated	SA-p vs SA
TRINITY_DN31_c0_g1_i10	71.71	670.41	2.01389e-85	0.458109	Upregulated	SA-p vs SA
TRINITY_DN31_c0_g1_i11	1934.13	8.06	1.61632e-50	-0.517897	Downregulated	SA-p vs SA
TRINITY_DN31_c0_g1_i3	8841.39	13.51	2.0311e-99	-0.644806	Downregulated	SA-p vs SA
TRINITY_DN31_c0_g1_i5	12.72	6.21	0.160156	0.0846606	Nonsignificant	SA-p vs SA
TRINITY_DN31_c0_g1_i7	1049.56	43.43	7.88229e-15	-0.227525	Downregulated	SA-p vs SA
TRINITY_DN31_c0_g2_i1	42	4	0.232679	-0.122078	Nonsignificant	SA-p vs SA
TRINITY_DN310_c0_g1_i1	8887	12	1.31718e-101	-0.66045	Downregulated	SA-p vs SA
TRINITY_DN31002_c0_g1_i1	46	7565	1.4467e-198	0.82082	Upregulated	SA-p vs SA
TRINITY_DN31017_c0_g1_i2	26719.1	39	8.50449e-127	-0.6506	Downregulated	SA-p vs SA
TRINITY_DN31029_c0_g1_i1	11	345	2.1132e-77	0.611217	Upregulated	SA-p vs SA
TRINITY_DN31030_c0_g1_i1	20	29879	2.84024e-267	1.09994	Upregulated	SA-p vs SA
TRINITY_DN31049_c0_g1_i1	4	766	9.65877e-110	0.840077	Upregulated	SA-p vs SA
TRINITY_DN31063_c0_g1_i1	1	2933	7.66397e-167	1.18527	Upregulated	SA-p vs SA
TRINITY_DN31065_c0_g1_i1	42	1	0.0143062	-0.297438	Downregulated	SA-p vs SA
TRINITY_DN311_c0_g1_i1	4615.13	176.23	3.54735e-23	-0.237686	Downregulated	SA-p vs SA
TRINITY_DN311_c0_g1_i19	257	5	1.50054e-10	-0.322986	Downregulated	SA-p vs SA
TRINITY_DN311_c0_g1_i5	17983.9	56.77	3.78982e-101	-0.553028	Downregulated	SA-p vs SA
TRINITY_DN31133_c0_g1_i1	2	550	5.39519e-96	0.885854	Upregulated	SA-p vs SA
TRINITY_DN31185_c0_g1_i2	63	12	1	-0.0343984	Nonsignificant	SA-p vs SA
TRINITY_DN31219_c0_g1_i1	7	6313	6.45125e-200	1.03609	Upregulated	SA-p vs SA
TRINITY_DN31223_c0_g1_i1	19	20424	9.01095e-251	1.0583	Upregulated	SA-p vs SA
TRINITY_DN31238_c0_g1_i1	324	1	4.00107e-18	-0.555877	Downregulated	SA-p vs SA
TRINITY_DN3128_c0_g1_i2	263	1	4.80239e-15	-0.529491	Downregulated	SA-p vs SA
TRINITY_DN313_c0_g1_i1	21	1853	3.12788e-147	0.742063	Upregulated	SA-p vs SA
TRINITY_DN31323_c0_g1_i1	28	1131	2.61091e-126	0.643221	Upregulated	SA-p vs SA
TRINITY_DN31352_c0_g1_i1	13	1496	4.48798e-138	0.775655	Upregulated	SA-p vs SA
TRINITY_DN31559_c0_g1_i1	144	1	1.71346e-08	-0.453298	Downregulated	SA-p vs SA
TRINITY_DN316_c0_g2_i1	7	17474	5.2919e-244	1.16488	Upregulated	SA-p vs SA
TRINITY_DN31653_c0_g1_i2	14	95	3.32299e-34	0.417575	Upregulated	SA-p vs SA
TRINITY_DN3182_c0_g1_i1	2	18151	1.19573e-245	1.32815	Upregulated	SA-p vs SA
TRINITY_DN3199_c0_g1_i1	193	1	1.53056e-11	-0.490345	Downregulated	SA-p vs SA
TRINITY_DN32_c0_g3_i2	1	2083.31	3.74481e-152	1.142	Upregulated	SA-p vs SA
TRINITY_DN32_c0_g5_i1	1	7856	2.30308e-209	1.3099	Upregulated	SA-p vs SA
TRINITY_DN32_c1_g1_i1	1	2145	2.10172e-153	1.14569	Upregulated	SA-p vs SA
TRINITY_DN320_c0_g1_i1	17	1	0.401742	-0.183028	Nonsignificant	SA-p vs SA
TRINITY_DN3220_c0_g2_i2	23082.6	18	2.656e-135	-0.729898	Downregulated	SA-p vs SA
TRINITY_DN3220_c1_g1_i1	686	2	2.89834e-30	-0.563085	Downregulated	SA-p vs SA
TRINITY_DN3223_c0_g1_i1	336	4	1.20695e-14	-0.385117	Downregulated	SA-p vs SA
TRINITY_DN323_c0_g2_i1	626	4	1.30944e-25	-0.463828	Downregulated	SA-p vs SA
TRINITY_DN323_c0_g4_i2	3440.89	8	1.9302e-69	-0.591713	Downregulated	SA-p vs SA
TRINITY_DN324_c0_g1_i1	71.17	3	0.00607118	-0.225182	Downregulated	SA-p vs SA
TRINITY_DN328_c0_g2_i1	989.6	12	2.51553e-28	-0.382787	Downregulated	SA-p vs SA
TRINITY_DN328_c0_g2_i2	14	33	3.23544e-12	0.283823	Upregulated	SA-p vs SA
TRINITY_DN328_c0_g3_i1	132.57	6	0.000197693	-0.216188	Downregulated	SA-p vs SA
TRINITY_DN3281_c0_g2_i1	961	1	5.09565e-40	-0.693406	Downregulated	SA-p vs SA
TRINITY_DN3298_c0_g2_i1	394	1	7.77611e-21	-0.58062	Downregulated	SA-p vs SA
TRINITY_DN33_c1_g1_i1	7	2680	5.5946e-163	0.92771	Upregulated	SA-p vs SA
TRINITY_DN3308_c0_g1_i1	383	1	2.86057e-20	-0.577038	Downregulated	SA-p vs SA
TRINITY_DN331_c0_g5_i1	1	7113	4.55963e-205	1.29733	Upregulated	SA-p vs SA
TRINITY_DN33123_c0_g1_i1	20	1	0.282135	-0.203586	Nonsignificant	SA-p vs SA
TRINITY_DN332_c0_g1_i6	1563	2	1.13402e-51	-0.667252	Downregulated	SA-p vs SA
TRINITY_DN332_c0_g1_i7	49	2	0.0173117	-0.229257	Downregulated	SA-p vs SA
TRINITY_DN332_c0_g1_i8	603	1	1.13712e-28	-0.634452	Downregulated	SA-p vs SA
TRINITY_DN3331_c0_g1_i1	636	1	5.2704e-30	-0.641192	Downregulated	SA-p vs SA
TRINITY_DN3333_c0_g2_i1	1179	1	5.59918e-45	-0.719268	Downregulated	SA-p vs SA
TRINITY_DN3334_c0_g1_i1	184	1	6.03101e-11	-0.484305	Downregulated	SA-p vs SA
TRINITY_DN334_c1_g1_i1	391.17	12	3.25942e-11	-0.26538	Downregulated	SA-p vs SA
TRINITY_DN334_c1_g3_i1	100	1	4.22639e-06	-0.407172	Downregulated	SA-p vs SA
TRINITY_DN334_c2_g1_i2	6564	3	1.13999e-99	-0.797482	Downregulated	SA-p vs SA
TRINITY_DN33457_c0_g1_i1	43	2	0.048953	-0.212734	Downregulated	SA-p vs SA
TRINITY_DN335_c0_g1_i4	672	1	2.18881e-31	-0.648157	Downregulated	SA-p vs SA
TRINITY_DN3364_c0_g2_i2	2	26457	5.43506e-262	1.37581	Upregulated	SA-p vs SA
TRINITY_DN340_c1_g1_i2	505.91	1	1.3518e-25	-0.612245	Downregulated	SA-p vs SA
TRINITY_DN340_c1_g2_i1	418	1	4.65984e-22	-0.5881	Downregulated	SA-p vs SA
TRINITY_DN3401_c0_g1_i1	233.88	0.27	4.69569e-16	-0.680271	Downregulated	SA-p vs SA
TRINITY_DN3401_c0_g1_i10	6320.88	8.69	2.20679e-91	-0.658173	Downregulated	SA-p vs SA
TRINITY_DN3401_c0_g1_i5	4366.18	7.03	2.93234e-79	-0.638189	Downregulated	SA-p vs SA
TRINITY_DN3416_c0_g1_i3	1345.72	2	7.10207e-47	-0.648318	Downregulated	SA-p vs SA
TRINITY_DN3417_c0_g1_i1	897	1	5.23469e-38	-0.684688	Downregulated	SA-p vs SA
TRINITY_DN3420_c0_g2_i2	16	20	2.4095e-06	0.203586	Upregulated	SA-p vs SA
TRINITY_DN3421_c0_g2_i4	7065.99	42.95	7.38285e-71	-0.470147	Downregulated	SA-p vs SA
TRINITY_DN3431_c0_g1_i1	1698	2	7.89902e-54	-0.677731	Downregulated	SA-p vs SA
TRINITY_DN3431_c0_g2_i1	145	1	1.19273e-08	-0.454173	Downregulated	SA-p vs SA
TRINITY_DN3441_c0_g1_i2	65874.8	14	8.47114e-184	-0.894341	Downregulated	SA-p vs SA
TRINITY_DN3441_c1_g1_i3	3889	1.86	6.07762e-82	-0.791738	Downregulated	SA-p vs SA
TRINITY_DN3441_c1_g2_i1	98	2	3.54976e-05	-0.316937	Downregulated	SA-p vs SA
TRINITY_DN3487_c0_g1_i2	126.37	2	7.86979e-07	-0.349098	Downregulated	SA-p vs SA
TRINITY_DN35_c0_g1_i2	14	35.63	1.9951e-13	0.293522	Upregulated	SA-p vs SA
TRINITY_DN350_c0_g1_i1	1186	1	3.73635e-45	-0.720016	Downregulated	SA-p vs SA
TRINITY_DN350_c0_g2_i1	677	1	1.48044e-31	-0.649094	Downregulated	SA-p vs SA
TRINITY_DN351_c0_g5_i1	1	2640	2.58339e-162	1.17196	Upregulated	SA-p vs SA
TRINITY_DN353_c0_g1_i2	92	1	7.6953e-06	-0.396625	Downregulated	SA-p vs SA
TRINITY_DN3533_c0_g2_i2	1	32629	4.35256e-271	1.49002	Upregulated	SA-p vs SA
TRINITY_DN3533_c1_g1_i1	21	56516	6.22897e-295	1.17439	Upregulated	SA-p vs SA
TRINITY_DN3533_c1_g2_i1	19	8870	1.2264e-214	0.952798	Upregulated	SA-p vs SA
TRINITY_DN3533_c1_g3_i1	6	7173	1.94056e-205	1.07174	Upregulated	SA-p vs SA
TRINITY_DN35673_c0_g1_i1	36	18212	4.23428e-242	0.962958	Upregulated	SA-p vs SA
TRINITY_DN35680_c0_g1_i1	21	7533	1.43297e-207	0.919471	Upregulated	SA-p vs SA
TRINITY_DN35705_c0_g1_i1	43	19258	2.97398e-240	0.947547	Upregulated	SA-p vs SA
TRINITY_DN35711_c0_g1_i1	37	24197	2.03156e-254	0.995436	Upregulated	SA-p vs SA
TRINITY_DN35722_c0_g1_i1	1	411	3.77657e-84	0.936682	Upregulated	SA-p vs SA
TRINITY_DN35798_c0_g1_i1	21	4710	2.74243e-187	0.860068	Upregulated	SA-p vs SA
TRINITY_DN35806_c0_g1_i1	814	2	1.08401e-33	-0.584726	Downregulated	SA-p vs SA
TRINITY_DN35835_c0_g1_i1	151	131	8.10039e-15	0.157387	Upregulated	SA-p vs SA
TRINITY_DN35867_c0_g1_i1	2088	4	1.08542e-57	-0.616205	Downregulated	SA-p vs SA
TRINITY_DN35888_c0_g1_i1	18	10165	1.55022e-220	0.976875	Upregulated	SA-p vs SA
TRINITY_DN35892_c0_g1_i1	1	2512	3.49509e-160	1.16567	Upregulated	SA-p vs SA
TRINITY_DN35896_c0_g1_i1	3	8649	1.56948e-213	1.18309	Upregulated	SA-p vs SA
TRINITY_DN359_c0_g3_i1	29	5998	9.79556e-198	0.849817	Upregulated	SA-p vs SA
TRINITY_DN35901_c0_g1_i1	1	13155	1.08373e-231	1.37511	Upregulated	SA-p vs SA
TRINITY_DN35926_c0_g1_i1	3664	3	4.95503e-78	-0.72373	Downregulated	SA-p vs SA
TRINITY_DN35933_c0_g1_i1	23	1811	2.90807e-146	0.727655	Upregulated	SA-p vs SA
TRINITY_DN35938_c0_g1_i1	1	5653	3.93101e-195	1.26827	Upregulated	SA-p vs SA
TRINITY_DN35971_c0_g1_i1	15	1085	1.77872e-124	0.716921	Upregulated	SA-p vs SA
TRINITY_DN36_c0_g2_i1	5	11726	1.03249e-226	1.15698	Upregulated	SA-p vs SA
TRINITY_DN36_c0_g2_i3	1	9122	7.84583e-216	1.3288	Upregulated	SA-p vs SA
TRINITY_DN36_c0_g3_i1	26	2199	1.46658e-154	0.736702	Upregulated	SA-p vs SA
TRINITY_DN36_c1_g2_i1	15	3015	4.67148e-168	0.846202	Upregulated	SA-p vs SA
TRINITY_DN36_c2_g1_i1	15	13137	1.21733e-231	1.03238	Upregulated	SA-p vs SA
TRINITY_DN360_c0_g2_i1	42	19018	4.96837e-241	0.948937	Upregulated	SA-p vs SA
TRINITY_DN36038_c0_g1_i1	43	1	0.0143062	-0.300414	Downregulated	SA-p vs SA
TRINITY_DN36059_c0_g1_i1	8	4446	9.00235e-185	0.974849	Upregulated	SA-p vs SA
TRINITY_DN36066_c0_g1_i1	2906	5	2.09715e-67	-0.629794	Downregulated	SA-p vs SA
TRINITY_DN36086_c0_g1_i1	4	9451	2.27021e-217	1.15792	Upregulated	SA-p vs SA
TRINITY_DN36108_c0_g1_i1	1432	4	8.90099e-46	-0.5685	Downregulated	SA-p vs SA
TRINITY_DN3614_c0_g1_i1	1	25485	2.28909e-260	1.45876	Upregulated	SA-p vs SA
TRINITY_DN3614_c3_g2_i1	23	256	2.86616e-66	0.480173	Upregulated	SA-p vs SA
TRINITY_DN364_c0_g1_i11	5374.39	5.5	3.25776e-88	-0.695516	Downregulated	SA-p vs SA
TRINITY_DN364_c0_g1_i5	1343.6	5.5	6.39185e-42	-0.520156	Downregulated	SA-p vs SA
TRINITY_DN36438_c0_g1_i1	1	1683	4.94008e-143	1.11501	Upregulated	SA-p vs SA
TRINITY_DN365_c0_g2_i1	31	6846	1.89479e-203	0.858109	Upregulated	SA-p vs SA
TRINITY_DN366_c0_g1_i26	2707.51	23	8.69565e-49	-0.427806	Downregulated	SA-p vs SA
TRINITY_DN36619_c0_g1_i2	1	139	4.6892e-44	0.799546	Upregulated	SA-p vs SA
TRINITY_DN3662_c1_g2_i1	1778.34	1.15	4.22761e-57	-0.75358	Downregulated	SA-p vs SA
TRINITY_DN3662_c1_g2_i3	538.66	3.85	1.23058e-22	-0.449655	Downregulated	SA-p vs SA
TRINITY_DN3662_c2_g1_i1	182	2	1.76111e-09	-0.395242	Downregulated	SA-p vs SA
TRINITY_DN36702_c0_g1_i1	12	2063	8.97631e-152	0.826431	Upregulated	SA-p vs SA
TRINITY_DN3672_c0_g1_i2	324.43	4.4	5.60107e-14	-0.368629	Downregulated	SA-p vs SA
TRINITY_DN3678_c0_g1_i1	315	1	1.25659e-17	-0.552313	Downregulated	SA-p vs SA
TRINITY_DN3678_c0_g2_i1	6056	5	2.20007e-94	-0.722676	Downregulated	SA-p vs SA
TRINITY_DN36836_c0_g1_i1	13	21	3.36881e-07	0.236023	Upregulated	SA-p vs SA
TRINITY_DN36845_c0_g1_i1	2007	2	5.65661e-59	-0.69888	Downregulated	SA-p vs SA
TRINITY_DN369_c1_g2_i1	31	7279	4.24625e-206	0.865866	Upregulated	SA-p vs SA
TRINITY_DN37_c0_g1_i1	71.5	9471.8	1.76289e-197	0.793462	Upregulated	SA-p vs SA
TRINITY_DN37_c0_g2_i3	14.3	35283.1	1.74565e-274	1.1634	Upregulated	SA-p vs SA
TRINITY_DN37_c0_g2_i4	44.4	16288	5.38293e-233	0.922306	Upregulated	SA-p vs SA
TRINITY_DN37_c0_g2_i5	4.8	14378.4	1.50987e-235	1.18794	Upregulated	SA-p vs SA
TRINITY_DN37_c0_g4_i3	1	9601	4.76152e-218	1.33527	Upregulated	SA-p vs SA
TRINITY_DN37_c0_g4_i4	11	5937.59	2.82047e-197	0.971161	Upregulated	SA-p vs SA
TRINITY_DN37_c2_g1_i1	24	12402	3.74029e-229	0.965645	Upregulated	SA-p vs SA
TRINITY_DN370_c0_g1_i2	584.34	1	2.10801e-28	-0.630476	Downregulated	SA-p vs SA
TRINITY_DN371_c0_g1_i1	1896.63	10	7.04264e-48	-0.488139	Downregulated	SA-p vs SA
TRINITY_DN37183_c0_g1_i1	171	1	4.8108e-10	-0.475036	Downregulated	SA-p vs SA
TRINITY_DN372_c0_g1_i1	3053	1	1.4659e-74	-0.839622	Downregulated	SA-p vs SA
TRINITY_DN3721_c0_g1_i2	1	335	5.08366e-76	0.910819	Upregulated	SA-p vs SA
TRINITY_DN373_c0_g2_i1	2000.14	2.87	8.7691e-58	-0.652761	Downregulated	SA-p vs SA
TRINITY_DN373_c0_g2_i2	175.49	0.13	4.20921e-13	-0.736392	Downregulated	SA-p vs SA
TRINITY_DN373_c0_g3_i1	429	1	1.32618e-22	-0.591385	Downregulated	SA-p vs SA
TRINITY_DN3738_c0_g2_i1	252	3	3.92493e-12	-0.385117	Downregulated	SA-p vs SA
TRINITY_DN374_c0_g1_i1	110.86	2.45	9.36946e-06	-0.306863	Downregulated	SA-p vs SA
TRINITY_DN374_c0_g1_i2	4177.14	6.55	1.41667e-77	-0.641536	Downregulated	SA-p vs SA
TRINITY_DN374_c0_g2_i1	225	1	3.24358e-13	-0.509751	Downregulated	SA-p vs SA
TRINITY_DN3753_c0_g1_i1	274	1	1.03889e-15	-0.534674	Downregulated	SA-p vs SA
TRINITY_DN3776_c0_g1_i1	7	19113	6.86332e-248	1.17622	Upregulated	SA-p vs SA
TRINITY_DN378_c0_g1_i5	2	12424.1	3.23806e-229	1.2802	Upregulated	SA-p vs SA
TRINITY_DN378_c0_g2_i10	13	433.47	1.85842e-86	0.618962	Upregulated	SA-p vs SA
TRINITY_DN378_c2_g1_i1	8	13071	2.03354e-231	1.11126	Upregulated	SA-p vs SA
TRINITY_DN38_c0_g1_i1	30	87765	4.8686111256e-314	1.18495	Upregulated	SA-p vs SA
TRINITY_DN3816_c0_g1_i1	102	1	2.86969e-06	-0.409677	Downregulated	SA-p vs SA
TRINITY_DN383_c0_g2_i3	142.47	1	2.46256e-08	-0.451947	Downregulated	SA-p vs SA
TRINITY_DN38381_c0_g1_i1	25	2	0.352234	-0.144133	Nonsignificant	SA-p vs SA
TRINITY_DN384_c0_g2_i1	18	57111	2.1897e-295	1.19521	Upregulated	SA-p vs SA
TRINITY_DN3852_c0_g1_i1	19	1	0.282135	-0.197098	Nonsignificant	SA-p vs SA
TRINITY_DN386_c1_g1_i1	22	1	0.194536	-0.215642	Nonsignificant	SA-p vs SA
TRINITY_DN3871_c0_g2_i6	1586.76	3.85	4.98259e-49	-0.586316	Downregulated	SA-p vs SA
TRINITY_DN3875_c0_g1_i6	2405.15	4	3.97606e-62	-0.634092	Downregulated	SA-p vs SA
TRINITY_DN388_c0_g1_i1	6096.2	4	1.13469e-95	-0.75174	Downregulated	SA-p vs SA
TRINITY_DN3882_c0_g2_i1	4532.7	1	5.2166e-89	-0.889612	Downregulated	SA-p vs SA
TRINITY_DN3882_c0_g2_i3	395.3	1	7.77611e-21	-0.581037	Downregulated	SA-p vs SA
TRINITY_DN3888_c0_g1_i1	90	132	4.02036e-23	0.223806	Upregulated	SA-p vs SA
TRINITY_DN389_c0_g1_i1	2657	1	4.79454e-70	-0.822049	Downregulated	SA-p vs SA
TRINITY_DN3890_c1_g1_i5	8488.48	2.79	4.82443e-110	-0.839185	Downregulated	SA-p vs SA
TRINITY_DN3890_c1_g1_i6	53.64	1.21	0.00188767	-0.304269	Downregulated	SA-p vs SA
TRINITY_DN39_c1_g1_i6	15440.1	1	4.69941e-137	-1.04465	Downregulated	SA-p vs SA
TRINITY_DN391_c0_g1_i2	16.21	2	0.780907	-0.0893293	Nonsignificant	SA-p vs SA
TRINITY_DN391_c0_g3_i1	28351	20	1.49268e-142	-0.742576	Downregulated	SA-p vs SA
TRINITY_DN391_c2_g1_i1	148	1	8.3061e-09	-0.456764	Downregulated	SA-p vs SA
TRINITY_DN392_c0_g1_i1	268	2	7.18505e-14	-0.444194	Downregulated	SA-p vs SA
TRINITY_DN3923_c0_g1_i2	15	85	1.58075e-31	0.394778	Upregulated	SA-p vs SA
TRINITY_DN39259_c0_g1_i1	17	1	0.401742	-0.183028	Nonsignificant	SA-p vs SA
TRINITY_DN395_c0_g1_i2	106.29	177.49	1.00197e-28	0.240219	Upregulated	SA-p vs SA
TRINITY_DN395_c0_g1_i3	126.71	190.51	1.75501e-27	0.226945	Upregulated	SA-p vs SA
TRINITY_DN3957_c0_g2_i1	44	66	4.06325e-16	0.226649	Upregulated	SA-p vs SA
TRINITY_DN3974_c0_g2_i1	10	6364	2.8871e-200	0.99199	Upregulated	SA-p vs SA
TRINITY_DN3988_c0_g1_i1	234	6	1.16634e-08	-0.288063	Downregulated	SA-p vs SA
TRINITY_DN399_c0_g1_i1	1506	4	2.45094e-47	-0.574873	Downregulated	SA-p vs SA
TRINITY_DN3991_c0_g1_i10	159.04	2	2.66661e-08	-0.378184	Downregulated	SA-p vs SA
TRINITY_DN3991_c0_g1_i4	339.69	1	1.88102e-18	-0.561858	Downregulated	SA-p vs SA
TRINITY_DN40_c0_g5_i4	17	11847	3.64691e-227	1.00347	Upregulated	SA-p vs SA
TRINITY_DN400_c0_g1_i1	15146	7	2.34348e-128	-0.79607	Downregulated	SA-p vs SA
TRINITY_DN4011_c0_g1_i1	318	1	9.42972e-18	-0.553512	Downregulated	SA-p vs SA
TRINITY_DN402_c0_g1_i4	81531	278	4.89903e-113	-0.543274	Downregulated	SA-p vs SA
TRINITY_DN40579_c0_g1_i1	5	3036	2.48737e-168	0.986049	Upregulated	SA-p vs SA
TRINITY_DN40591_c0_g1_i1	29	94882	2.013686e-317	1.1991	Upregulated	SA-p vs SA
TRINITY_DN406_c0_g1_i1	141	1	8.6025e-09	-0.450635	Downregulated	SA-p vs SA
TRINITY_DN406_c2_g3_i1	6	85	1.20269e-30	0.510684	Upregulated	SA-p vs SA
TRINITY_DN406_c3_g1_i1	18	4171	4.832e-182	0.864194	Upregulated	SA-p vs SA
TRINITY_DN40613_c0_g1_i1	3	2871	6.38898e-166	1.0436	Upregulated	SA-p vs SA
TRINITY_DN40614_c0_g1_i1	1	17597	2.64729e-244	1.41191	Upregulated	SA-p vs SA
TRINITY_DN40701_c0_g1_i1	88	10408	3.05961e-196	0.77912	Upregulated	SA-p vs SA
TRINITY_DN40710_c0_g1_i1	38.73	1	0.0153481	-0.287184	Downregulated	SA-p vs SA
TRINITY_DN40727_c0_g1_i1	1131	7	5.45087e-36	-0.467862	Downregulated	SA-p vs SA
TRINITY_DN40729_c0_g1_i1	17	5146	4.23355e-191	0.897996	Upregulated	SA-p vs SA
TRINITY_DN40759_c0_g1_i1	12	8569	3.88661e-213	1.00656	Upregulated	SA-p vs SA
TRINITY_DN40760_c0_g1_i1	16	583	1.42221e-98	0.630185	Upregulated	SA-p vs SA
TRINITY_DN40767_c0_g1_i1	1	13008	3.32692e-231	1.37369	Upregulated	SA-p vs SA
TRINITY_DN40774_c0_g1_i1	34	8099	1.0214e-208	0.867685	Upregulated	SA-p vs SA
TRINITY_DN40776_c0_g1_i1	8	5695	1.83889e-195	1.00617	Upregulated	SA-p vs SA
TRINITY_DN40784_c0_g1_i1	4	14606	3.14071e-236	1.21299	Upregulated	SA-p vs SA
TRINITY_DN408_c0_g1_i1	11	1	0.731885	-0.127963	Nonsignificant	SA-p vs SA
TRINITY_DN40808_c0_g1_i1	1	4550	9.19397e-186	1.24081	Upregulated	SA-p vs SA
TRINITY_DN40848_c0_g1_i1	1914	5	2.86419e-53	-0.576972	Downregulated	SA-p vs SA
TRINITY_DN4086_c0_g2_i2	174	1	3.39816e-10	-0.477236	Downregulated	SA-p vs SA
TRINITY_DN4086_c0_g4_i1	625	1	1.45292e-29	-0.638985	Downregulated	SA-p vs SA
TRINITY_DN4087_c0_g1_i1	1304.06	7	9.17211e-40	-0.485872	Downregulated	SA-p vs SA
TRINITY_DN4087_c0_g2_i1	12392.7	1	7.09719e-128	-1.01684	Downregulated	SA-p vs SA
TRINITY_DN40879_c0_g1_i1	505	1	1.3518e-25	-0.612017	Downregulated	SA-p vs SA
TRINITY_DN40931_c0_g1_i1	9806	4	2.42172e-114	-0.811866	Downregulated	SA-p vs SA
TRINITY_DN4098_c0_g1_i1	4125	1	2.32161e-85	-0.87769	Downregulated	SA-p vs SA
TRINITY_DN41_c0_g2_i5	170.07	1	6.81463e-10	-0.474346	Downregulated	SA-p vs SA
TRINITY_DN4107_c1_g1_i8	30.01	3	0.311691	-0.115949	Nonsignificant	SA-p vs SA
TRINITY_DN4107_c1_g2_i1	1036	1	1.27259e-41	-0.702912	Downregulated	SA-p vs SA
TRINITY_DN411_c0_g2_i1	9	2214	8.6498e-155	0.871757	Upregulated	SA-p vs SA
TRINITY_DN411_c1_g2_i1	16	53	2.89372e-20	0.326863	Upregulated	SA-p vs SA
TRINITY_DN411_c1_g4_i1	18	68000	5.82316e-303	1.21729	Upregulated	SA-p vs SA
TRINITY_DN41495_c0_g1_i1	10	25	3.00325e-10	0.291266	Upregulated	SA-p vs SA
TRINITY_DN415_c0_g1_i1	2	17696	1.50908e-244	1.32494	Upregulated	SA-p vs SA
TRINITY_DN41793_c0_g1_i1	2075	3	1.59617e-58	-0.651806	Downregulated	SA-p vs SA
TRINITY_DN420_c0_g2_i1	1993.53	1.74	9.6986e-59	-0.715644	Downregulated	SA-p vs SA
TRINITY_DN420_c0_g2_i4	1094.47	1.26	2.9012e-43	-0.680622	Downregulated	SA-p vs SA
TRINITY_DN4202_c0_g3_i1	31	26980	7.54421e-263	1.03159	Upregulated	SA-p vs SA
TRINITY_DN42072_c0_g1_i1	15	139	6.45476e-45	0.456991	Upregulated	SA-p vs SA
TRINITY_DN42109_c0_g1_i1	1	847	6.24947e-114	1.02815	Upregulated	SA-p vs SA
TRINITY_DN4217_c0_g1_i1	3173	6	3.42444e-69	-0.61785	Downregulated	SA-p vs SA
TRINITY_DN4227_c0_g1_i4	3232	3	6.91597e-74	-0.707861	Downregulated	SA-p vs SA
TRINITY_DN4227_c1_g1_i1	132	1	3.82351e-08	-0.442291	Downregulated	SA-p vs SA
TRINITY_DN423_c0_g1_i2	543.1	2	3.86175e-25	-0.533538	Downregulated	SA-p vs SA
TRINITY_DN42311_c0_g1_i1	5	3095	3.6859e-169	0.988484	Upregulated	SA-p vs SA
TRINITY_DN4236_c0_g1_i1	981	2	2.07368e-38	-0.608332	Downregulated	SA-p vs SA
TRINITY_DN42389_c0_g1_i1	20	24	1.33121e-06	0.198422	Upregulated	SA-p vs SA
TRINITY_DN424_c0_g1_i1	2843.71	3	3.61578e-69	-0.69167	Downregulated	SA-p vs SA
TRINITY_DN425_c0_g1_i3	565.03	1.5	4.54645e-26	-0.574936	Downregulated	SA-p vs SA
TRINITY_DN425_c0_g1_i7	535.74	1.5	7.39724e-25	-0.568202	Downregulated	SA-p vs SA
TRINITY_DN4254_c0_g1_i1	176.22	0.78	2.40176e-10	-0.510269	Downregulated	SA-p vs SA
TRINITY_DN4254_c0_g1_i2	4600.9	0.22	2.03601e-91	-1.08303	Downregulated	SA-p vs SA
TRINITY_DN4273_c0_g1_i1	8164.35	2.37	4.01296e-110	-0.854898	Downregulated	SA-p vs SA
TRINITY_DN4273_c0_g1_i2	4545.65	6.63	8.36744e-81	-0.650695	Downregulated	SA-p vs SA
TRINITY_DN428_c0_g1_i1	553	1	4.32752e-27	-0.623503	Downregulated	SA-p vs SA
TRINITY_DN429_c0_g2_i3	1874.2	3	1.49614e-55	-0.638931	Downregulated	SA-p vs SA
TRINITY_DN43_c0_g1_i17	46	26733.7	3.14499e-253	0.980506	Upregulated	SA-p vs SA
TRINITY_DN43_c0_g3_i2	55	53440.6	7.67574e-279	1.04552	Upregulated	SA-p vs SA
TRINITY_DN4327_c0_g3_i1	2801	1	5.78993e-72	-0.828725	Downregulated	SA-p vs SA
TRINITY_DN433_c0_g1_i1	19	23124.6	3.7034e-256	1.07401	Upregulated	SA-p vs SA
TRINITY_DN4351_c0_g1_i1	6035	4	2.86886e-95	-0.750463	Downregulated	SA-p vs SA
TRINITY_DN4351_c0_g2_i1	518	3	4.76782e-23	-0.476263	Downregulated	SA-p vs SA
TRINITY_DN4370_c0_g1_i1	1490	2	4.41982e-50	-0.661202	Downregulated	SA-p vs SA
TRINITY_DN439_c0_g2_i3	1000.71	3.67	5.73046e-36	-0.53406	Downregulated	SA-p vs SA
TRINITY_DN439_c0_g2_i6	3993.99	3.67	9.77282e-80	-0.70914	Downregulated	SA-p vs SA
TRINITY_DN439_c0_g2_i7	588.02	3.67	3.71254e-24	-0.466802	Downregulated	SA-p vs SA
TRINITY_DN44_c0_g1_i2	0.21	18778.9	4.01597e-247	1.61755	Upregulated	SA-p vs SA
TRINITY_DN44_c0_g1_i5	43.28	4598.9	2.4644e-178	0.765571	Upregulated	SA-p vs SA
TRINITY_DN44_c0_g1_i6	5.74	24815.2	3.25903e-259	1.23435	Upregulated	SA-p vs SA
TRINITY_DN44_c0_g5_i1	1	8595	2.95386e-213	1.32127	Upregulated	SA-p vs SA
TRINITY_DN44_c1_g2_i1	5	10191	1.23515e-220	1.13923	Upregulated	SA-p vs SA
TRINITY_DN443_c0_g5_i2	15	4874.74	9.21575e-189	0.906979	Upregulated	SA-p vs SA
TRINITY_DN444_c0_g1_i1	187	1	4.27624e-11	-0.48635	Downregulated	SA-p vs SA
TRINITY_DN445_c0_g1_i1	62814	39	2.71763e-163	-0.758728	Downregulated	SA-p vs SA
TRINITY_DN4459_c0_g1_i1	4106	39	1.99989e-53	-0.413683	Downregulated	SA-p vs SA
TRINITY_DN44700_c0_g1_i1	12	1	0.731885	-0.138969	Nonsignificant	SA-p vs SA
TRINITY_DN44837_c0_g1_i1	13	1	0.517394	-0.149094	Nonsignificant	SA-p vs SA
TRINITY_DN4497_c0_g2_i3	1697.96	42	1.23637e-25	-0.292611	Downregulated	SA-p vs SA
TRINITY_DN4497_c0_g3_i1	424	1	2.81406e-22	-0.589902	Downregulated	SA-p vs SA
TRINITY_DN45_c0_g1_i12	10946.9	6.19	2.39776e-116	-0.770556	Downregulated	SA-p vs SA
TRINITY_DN45_c0_g1_i15	1.33	839.88	1.39472e-113	0.99101	Upregulated	SA-p vs SA
TRINITY_DN45_c0_g1_i19	1319.87	6.19	2.097e-41	-0.502952	Downregulated	SA-p vs SA
TRINITY_DN45_c0_g1_i2	4.67	12614.1	7.10233e-230	1.17485	Upregulated	SA-p vs SA
TRINITY_DN45_c0_g1_i5	6	1126.29	5.76585e-126	0.837552	Upregulated	SA-p vs SA
TRINITY_DN4504_c0_g1_i1	2899	1	3.16464e-73	-0.833075	Downregulated	SA-p vs SA
TRINITY_DN4504_c0_g2_i2	324	1	4.00107e-18	-0.555877	Downregulated	SA-p vs SA
TRINITY_DN4511_c0_g1_i1	221	3	1.32894e-10	-0.368513	Downregulated	SA-p vs SA
TRINITY_DN4517_c0_g1_i1	1363	34	1.58577e-23	-0.291545	Downregulated	SA-p vs SA
TRINITY_DN4517_c0_g2_i1	12207	14	1.51562e-112	-0.681102	Downregulated	SA-p vs SA
TRINITY_DN452_c0_g2_i1	507	1	1.074e-25	-0.612517	Downregulated	SA-p vs SA
TRINITY_DN452_c0_g2_i2	274	1	1.03889e-15	-0.534674	Downregulated	SA-p vs SA
TRINITY_DN45300_c0_g1_i1	1	6230	2.46519e-199	1.28056	Upregulated	SA-p vs SA
TRINITY_DN45330_c0_g1_i1	1	21918	7.94752e-254	1.43969	Upregulated	SA-p vs SA
TRINITY_DN45342_c0_g1_i1	50	6216	8.80646e-188	0.785428	Upregulated	SA-p vs SA
TRINITY_DN4535_c0_g4_i1	1	1136	2.61091e-126	1.06529	Upregulated	SA-p vs SA
TRINITY_DN45367_c0_g1_i1	1	4082	4.40906e-181	1.22708	Upregulated	SA-p vs SA
TRINITY_DN45391_c0_g1_i1	1	15006	2.13077e-237	1.39176	Upregulated	SA-p vs SA
TRINITY_DN45393_c0_g1_i1	8	19880	1.34912e-249	1.1643	Upregulated	SA-p vs SA
TRINITY_DN454_c0_g2_i1	17	11328	3.17906e-225	0.997808	Upregulated	SA-p vs SA
TRINITY_DN454_c0_g8_i1	2	1623	1.74667e-141	1.02274	Upregulated	SA-p vs SA
TRINITY_DN454_c0_g9_i1	2	11821	4.63504e-227	1.2739	Upregulated	SA-p vs SA
TRINITY_DN45420_c0_g1_i1	19	8993	3.11026e-215	0.95454	Upregulated	SA-p vs SA
TRINITY_DN45429_c0_g1_i1	20	2209	9.72427e-155	0.770464	Upregulated	SA-p vs SA
TRINITY_DN45472_c0_g1_i1	6553	4	1.51971e-98	-0.76088	Downregulated	SA-p vs SA
TRINITY_DN45474_c0_g1_i1	6	6617	6.00253e-202	1.06154	Upregulated	SA-p vs SA
TRINITY_DN456_c0_g2_i1	30	8879	1.08465e-214	0.895148	Upregulated	SA-p vs SA
TRINITY_DN45669_c0_g1_i1	1	4706	3.23843e-187	1.24508	Upregulated	SA-p vs SA
TRINITY_DN45693_c0_g1_i1	17	1809	3.51677e-146	0.765752	Upregulated	SA-p vs SA
TRINITY_DN45700_c0_g1_i1	24	953	4.41258e-119	0.641059	Upregulated	SA-p vs SA
TRINITY_DN45714_c0_g1_i1	1	1326	7.17286e-133	1.08485	Upregulated	SA-p vs SA
TRINITY_DN45739_c0_g1_i1	18	4729	1.86267e-187	0.880076	Upregulated	SA-p vs SA
TRINITY_DN458_c0_g9_i1	16	9474.42	1.73757e-217	0.982874	Upregulated	SA-p vs SA
TRINITY_DN45800_c0_g1_i1	1	447	1.65735e-87	0.947303	Upregulated	SA-p vs SA
TRINITY_DN45859_c0_g1_i1	23	7455	4.01065e-207	0.906646	Upregulated	SA-p vs SA
TRINITY_DN46011_c0_g1_i1	2100	15	1.66383e-46	-0.449734	Downregulated	SA-p vs SA
TRINITY_DN4605_c1_g2_i2	47.62	0.42	0.000206996	-0.423058	Downregulated	SA-p vs SA
TRINITY_DN4605_c1_g2_i5	4454.93	2.58	5.60003e-85	-0.767533	Downregulated	SA-p vs SA
TRINITY_DN461_c0_g1_i11	225.36	3	1.76173e-10	-0.370984	Downregulated	SA-p vs SA
TRINITY_DN461_c0_g1_i9	104.42	2	1.72368e-05	-0.324964	Downregulated	SA-p vs SA
TRINITY_DN46124_c0_g1_i1	158	2	2.66661e-08	-0.377355	Downregulated	SA-p vs SA
TRINITY_DN46144_c0_g1_i1	126	1	1.17539e-07	-0.436407	Downregulated	SA-p vs SA
TRINITY_DN46229_c0_g1_i1	1993	4	4.30289e-56	-0.610315	Downregulated	SA-p vs SA
TRINITY_DN46413_c0_g1_i1	316	1	1.25659e-17	-0.552714	Downregulated	SA-p vs SA
TRINITY_DN465_c0_g2_i1	20	1	0.282135	-0.203586	Nonsignificant	SA-p vs SA
TRINITY_DN465_c0_g3_i1	164	7	3.7881e-05	-0.223601	Downregulated	SA-p vs SA
TRINITY_DN47_c0_g1_i1	199	4	1.36711e-08	-0.318858	Downregulated	SA-p vs SA
TRINITY_DN4716_c1_g3_i1	19	104832	0	1.2652	Upregulated	SA-p vs SA
TRINITY_DN472_c1_g2_i1	63	1	0.00057344	-0.348727	Downregulated	SA-p vs SA
TRINITY_DN472_c1_g2_i2	5835	1	2.36963e-98	-0.92156	Downregulated	SA-p vs SA
TRINITY_DN4728_c0_g1_i1	3	34	3.27725e-14	0.482458	Upregulated	SA-p vs SA
TRINITY_DN474_c0_g1_i5	210	2	7.13952e-11	-0.413344	Downregulated	SA-p vs SA
TRINITY_DN47490_c0_g1_i1	1	1034	2.48967e-122	1.05339	Upregulated	SA-p vs SA
TRINITY_DN475_c0_g1_i1	14	1	0.517394	-0.158468	Nonsignificant	SA-p vs SA
TRINITY_DN477_c0_g1_i2	5964.39	5.17	8.77821e-94	-0.716519	Downregulated	SA-p vs SA
TRINITY_DN477_c0_g1_i4	14870.1	13.31	1.72218e-121	-0.712459	Downregulated	SA-p vs SA
TRINITY_DN477_c0_g1_i5	12818	12.52	2.3769e-115	-0.701414	Downregulated	SA-p vs SA
TRINITY_DN4773_c0_g1_i1	11	13	0.000339552	0.196491	Upregulated	SA-p vs SA
TRINITY_DN478_c0_g2_i1	1015	2	2.18805e-39	-0.612642	Downregulated	SA-p vs SA
TRINITY_DN47939_c0_g1_i1	262	2	1.74139e-13	-0.441329	Downregulated	SA-p vs SA
TRINITY_DN48_c0_g2_i1	1	8370	4.15246e-212	1.31792	Upregulated	SA-p vs SA
TRINITY_DN48_c0_g4_i1	2	36514	5.70716e-276	1.41657	Upregulated	SA-p vs SA
TRINITY_DN486_c0_g2_i4	1574	1	1.29107e-53	-0.755819	Downregulated	SA-p vs SA
TRINITY_DN486_c0_g2_i8	43	7	0.878452	-0.054266	Nonsignificant	SA-p vs SA
TRINITY_DN4868_c0_g1_i1	4082	10	1.15768e-73	-0.585099	Downregulated	SA-p vs SA
TRINITY_DN4868_c0_g2_i1	163	1	6.69328e-10	-0.468975	Downregulated	SA-p vs SA
TRINITY_DN487_c0_g3_i1	346	1	8.21654e-19	-0.564187	Downregulated	SA-p vs SA
TRINITY_DN4874_c2_g1_i7	3807.43	7	1.52617e-74	-0.621408	Downregulated	SA-p vs SA
TRINITY_DN4874_c2_g2_i1	241	1	1.08239e-13	-0.518441	Downregulated	SA-p vs SA
TRINITY_DN4874_c4_g1_i1	133	1	3.82351e-08	-0.443246	Downregulated	SA-p vs SA
TRINITY_DN489_c0_g1_i2	1385	1	1.95265e-49	-0.739638	Downregulated	SA-p vs SA
TRINITY_DN4918_c0_g1_i2	14	3194	1.54636e-170	0.862225	Upregulated	SA-p vs SA
TRINITY_DN4918_c0_g3_i1	29	17457	5.68999e-244	0.984954	Upregulated	SA-p vs SA
TRINITY_DN4933_c0_g1_i1	11	4469	5.26512e-185	0.935219	Upregulated	SA-p vs SA
TRINITY_DN494_c3_g1_i1	62	5	0.095186	-0.143117	Nonsignificant	SA-p vs SA
TRINITY_DN497_c0_g2_i1	19	5482	7.79234e-194	0.891928	Upregulated	SA-p vs SA
TRINITY_DN5_c0_g1_i21	10	47799.4	1.16803e-287	1.24705	Upregulated	SA-p vs SA
TRINITY_DN5_c0_g1_i37	20.58	17359.5	1.00824e-243	1.02763	Upregulated	SA-p vs SA
TRINITY_DN5_c0_g2_i2	24	35803.9	4.01361e-275	1.09976	Upregulated	SA-p vs SA
TRINITY_DN50_c0_g1_i2	3414.6	13.66	1.37002e-63	-0.523064	Downregulated	SA-p vs SA
TRINITY_DN50_c0_g1_i7	15530.6	18.34	9.55532e-119	-0.677406	Downregulated	SA-p vs SA
TRINITY_DN50022_c0_g1_i1	1	1652	3.08557e-142	1.11266	Upregulated	SA-p vs SA
TRINITY_DN50023_c0_g1_i1	12	2066	7.75513e-152	0.826615	Upregulated	SA-p vs SA
TRINITY_DN50031_c0_g1_i1	9	4276	4.26353e-183	0.955019	Upregulated	SA-p vs SA
TRINITY_DN50074_c0_g1_i1	1	18649	8.03457e-247	1.41926	Upregulated	SA-p vs SA
TRINITY_DN50086_c0_g1_i1	8	7519.58	1.75493e-207	1.04132	Upregulated	SA-p vs SA
TRINITY_DN50100_c0_g1_i1	79	55046	2.46693e-271	1.00346	Upregulated	SA-p vs SA
TRINITY_DN50114_c0_g1_i1	1	204	3.53629e-57	0.848076	Upregulated	SA-p vs SA
TRINITY_DN5012_c0_g1_i1	13	174	3.67186e-52	0.503501	Upregulated	SA-p vs SA
TRINITY_DN50169_c0_g1_i1	7	940	2.31097e-118	0.795182	Upregulated	SA-p vs SA
TRINITY_DN50198_c0_g1_i1	1	2427	1.04608e-158	1.16131	Upregulated	SA-p vs SA
TRINITY_DN5021_c0_g1_i1	2	13227	6.25548e-232	1.28812	Upregulated	SA-p vs SA
TRINITY_DN50253_c0_g1_i1	1	914	3.94579e-117	1.03778	Upregulated	SA-p vs SA
TRINITY_DN50264_c0_g1_i1	15	13676	2.20114e-233	1.03747	Upregulated	SA-p vs SA
TRINITY_DN50282_c0_g1_i1	1	3187	2.05712e-170	1.19577	Upregulated	SA-p vs SA
TRINITY_DN50284_c0_g1_i1	1	5666	3.12072e-195	1.26856	Upregulated	SA-p vs SA
TRINITY_DN5029_c0_g2_i1	983.17	2	1.78224e-38	-0.608611	Downregulated	SA-p vs SA
TRINITY_DN50328_c0_g1_i1	1	3516	1.20598e-174	1.2082	Upregulated	SA-p vs SA
TRINITY_DN50366_c0_g1_i1	1	6765	6.77319e-203	1.29099	Upregulated	SA-p vs SA
TRINITY_DN50483_c0_g1_i1	21	5132	5.45725e-191	0.870922	Upregulated	SA-p vs SA
TRINITY_DN505_c0_g1_i1	12	8046	2.06232e-210	0.998593	Upregulated	SA-p vs SA
TRINITY_DN50535_c0_g1_i1	13	15502	8.16614e-239	1.07142	Upregulated	SA-p vs SA
TRINITY_DN50598_c0_g1_i1	1	1958	1.6864e-149	1.13415	Upregulated	SA-p vs SA
TRINITY_DN5082_c0_g1_i1	510	1	8.53705e-26	-0.613263	Downregulated	SA-p vs SA
TRINITY_DN50863_c0_g1_i1	659	4	2.0679e-26	-0.470326	Downregulated	SA-p vs SA
TRINITY_DN50980_c0_g1_i1	14	20	3.85312e-06	0.220477	Upregulated	SA-p vs SA
TRINITY_DN51_c0_g1_i3	1	643.99	1.67796e-102	0.99349	Upregulated	SA-p vs SA
TRINITY_DN510_c0_g2_i1	357.03	3	1.46167e-16	-0.429187	Downregulated	SA-p vs SA
TRINITY_DN51044_c0_g1_i1	2556	1	1.18082e-68	-0.817147	Downregulated	SA-p vs SA
TRINITY_DN51120_c0_g1_i1	2	1756	7.54964e-145	1.0327	Upregulated	SA-p vs SA
TRINITY_DN51208_c0_g1_i1	21	140	1.4964e-45	0.415336	Upregulated	SA-p vs SA
TRINITY_DN51379_c0_g1_i1	107	1	1.32245e-06	-0.415731	Downregulated	SA-p vs SA
TRINITY_DN514_c0_g1_i1	18	11031	4.46751e-224	0.987217	Upregulated	SA-p vs SA
TRINITY_DN5148_c0_g1_i1	11	31224	3.5092e-269	1.18113	Upregulated	SA-p vs SA
TRINITY_DN515_c0_g2_i2	352.72	1	3.60962e-19	-0.56662	Downregulated	SA-p vs SA
TRINITY_DN5153_c0_g1_i1	353	380	4.16097e-25	0.184683	Upregulated	SA-p vs SA
TRINITY_DN5153_c0_g2_i1	276	388	1.66748e-31	0.218444	Upregulated	SA-p vs SA
TRINITY_DN516_c0_g2_i2	1459.13	1	3.99014e-51	-0.746233	Downregulated	SA-p vs SA
TRINITY_DN517_c0_g1_i2	11.36	15.9	2.84737e-05	0.21789	Upregulated	SA-p vs SA
TRINITY_DN517_c0_g1_i3	264.64	418.9	4.07398e-35	0.233454	Upregulated	SA-p vs SA
TRINITY_DN519_c0_g2_i1	421	1	3.62018e-22	-0.589004	Downregulated	SA-p vs SA
TRINITY_DN52_c0_g1_i1	35	70356.7	1.9416e-302	1.13748	Upregulated	SA-p vs SA
TRINITY_DN52_c0_g2_i11	15832	23.87	7.73284e-115	-0.646501	Downregulated	SA-p vs SA
TRINITY_DN52_c0_g2_i6	62	19469.4	3.84755e-232	0.902639	Upregulated	SA-p vs SA
TRINITY_DN52_c0_g2_i7	3.55059e+06	7491.08	2.11744e-138	-0.603997	Downregulated	SA-p vs SA
TRINITY_DN5202_c2_g1_i1	8	4734	1.76274e-187	0.982789	Upregulated	SA-p vs SA
TRINITY_DN52021_c0_g1_i1	1	995	1.04204e-120	1.04852	Upregulated	SA-p vs SA
TRINITY_DN5209_c0_g1_i1	75	1	0.000184687	-0.370782	Downregulated	SA-p vs SA
TRINITY_DN521_c0_g1_i1	28	2	0.186747	-0.158468	Nonsignificant	SA-p vs SA
TRINITY_DN5227_c0_g2_i1	378	1	1.85602e-20	-0.575376	Downregulated	SA-p vs SA
TRINITY_DN523_c0_g1_i1	4058.49	1	1.01938e-84	-0.875634	Downregulated	SA-p vs SA
TRINITY_DN524_c0_g2_i6	169.36	3	9.21502e-08	-0.334848	Downregulated	SA-p vs SA
TRINITY_DN524_c0_g2_i7	44.1	1	0.00962572	-0.303609	Downregulated	SA-p vs SA
TRINITY_DN52407_c0_g1_i1	131	1	5.55759e-08	-0.441329	Downregulated	SA-p vs SA
TRINITY_DN526_c0_g1_i1	4	3775	1.02957e-177	1.04183	Upregulated	SA-p vs SA
TRINITY_DN526_c0_g5_i1	39	15323	4.42297e-233	0.930984	Upregulated	SA-p vs SA
TRINITY_DN5269_c1_g1_i1	1254.85	13	1.97867e-33	-0.402701	Downregulated	SA-p vs SA
TRINITY_DN5271_c0_g1_i2	750	1	1.06662e-33	-0.662048	Downregulated	SA-p vs SA
TRINITY_DN5271_c0_g2_i1	107	2	1.8943e-05	-0.328051	Downregulated	SA-p vs SA
TRINITY_DN5271_c0_g5_i1	179	1	1.69856e-10	-0.48082	Downregulated	SA-p vs SA
TRINITY_DN528_c0_g2_i2	1989.28	11	2.93107e-48	-0.482116	Downregulated	SA-p vs SA
TRINITY_DN531_c0_g1_i1	19	7385	1.03845e-206	0.929621	Upregulated	SA-p vs SA
TRINITY_DN5311_c0_g1_i1	303	1	7.13718e-17	-0.5474	Downregulated	SA-p vs SA
TRINITY_DN53391_c0_g1_i1	24	1	0.13207	-0.226649	Nonsignificant	SA-p vs SA
TRINITY_DN54_c0_g2_i1	1353.24	4.99	4.49302e-43	-0.53337	Downregulated	SA-p vs SA
TRINITY_DN54_c0_g2_i3	22971.8	2.01	4.44862e-152	-1.0066	Downregulated	SA-p vs SA
TRINITY_DN541_c0_g1_i2	22	23392	1.17272e-256	1.05692	Upregulated	SA-p vs SA
TRINITY_DN5440_c0_g2_i2	145.34	0.05	2.35366e-11	-0.833413	Downregulated	SA-p vs SA
TRINITY_DN5440_c0_g2_i7	1788.17	1.95	1.4326e-55	-0.687479	Downregulated	SA-p vs SA
TRINITY_DN545_c0_g1_i11	639	5.25	8.00601e-25	-0.432029	Downregulated	SA-p vs SA
TRINITY_DN5487_c1_g1_i2	150.06	1	5.78702e-09	-0.458512	Downregulated	SA-p vs SA
TRINITY_DN5493_c0_g1_i1	23	25	1.79919e-06	0.185907	Upregulated	SA-p vs SA
TRINITY_DN55_c0_g1_i2	439.71	588.18	1.66712e-32	0.212159	Upregulated	SA-p vs SA
TRINITY_DN55_c0_g1_i3	24.11	20.78	5.64529e-05	0.156558	Upregulated	SA-p vs SA
TRINITY_DN55_c0_g1_i6	81.18	98.04	2.79727e-17	0.19923	Upregulated	SA-p vs SA
TRINITY_DN5517_c0_g1_i1	19	1	0.282135	-0.197098	Nonsignificant	SA-p vs SA
TRINITY_DN5523_c0_g1_i3	900	4	1.79752e-33	-0.509751	Downregulated	SA-p vs SA
TRINITY_DN5548_c0_g2_i1	22	7587	7.01165e-208	0.91449	Upregulated	SA-p vs SA
TRINITY_DN558_c0_g3_i1	6809	4	4.48792e-100	-0.765727	Downregulated	SA-p vs SA
TRINITY_DN56_c0_g3_i1	1	6324	5.54333e-200	1.28246	Upregulated	SA-p vs SA
TRINITY_DN56_c0_g4_i1	35	11192	1.03089e-222	0.904934	Upregulated	SA-p vs SA
TRINITY_DN56_c2_g1_i1	12	948	9.4105e-119	0.728073	Upregulated	SA-p vs SA
TRINITY_DN56_c3_g2_i1	1	28481	3.44969e-265	1.47282	Upregulated	SA-p vs SA
TRINITY_DN560_c0_g1_i3	299.81	1	9.55611e-17	-0.546061	Downregulated	SA-p vs SA
TRINITY_DN5652_c0_g3_i1	153	2	7.30664e-08	-0.373287	Downregulated	SA-p vs SA
TRINITY_DN5661_c0_g1_i1	144	2	1.17136e-07	-0.365618	Downregulated	SA-p vs SA
TRINITY_DN568_c1_g1_i1	7215	3	1.84592e-103	-0.809444	Downregulated	SA-p vs SA
TRINITY_DN5688_c0_g1_i1	27.76	46.62	1.96093e-13	0.240939	Upregulated	SA-p vs SA
TRINITY_DN57_c0_g1_i3	36.59	10960.4	4.20661e-220	0.896669	Upregulated	SA-p vs SA
TRINITY_DN57_c0_g1_i4	0.41	8653.4	1.50743e-213	1.43491	Upregulated	SA-p vs SA
TRINITY_DN570_c0_g2_i1	61	1	0.000857787	-0.344646	Downregulated	SA-p vs SA
TRINITY_DN5725_c0_g1_i1	568	1	9.45035e-28	-0.626888	Downregulated	SA-p vs SA
TRINITY_DN5729_c0_g2_i1	663	1	4.80554e-31	-0.646451	Downregulated	SA-p vs SA
TRINITY_DN5777_c0_g1_i1	3663.2	10	1.19241e-69	-0.571406	Downregulated	SA-p vs SA
TRINITY_DN5777_c1_g1_i1	1630.71	3	1.85116e-51	-0.621327	Downregulated	SA-p vs SA
TRINITY_DN58_c0_g1_i9	30	1	0.0760833	-0.254875	Nonsignificant	SA-p vs SA
TRINITY_DN584_c0_g1_i1	1071.27	5	1.5766e-36	-0.503561	Downregulated	SA-p vs SA
TRINITY_DN5848_c0_g1_i1	75	4	0.00931543	-0.195422	Downregulated	SA-p vs SA
TRINITY_DN5849_c0_g1_i1	25	4501	2.44896e-185	0.832271	Upregulated	SA-p vs SA
TRINITY_DN586_c0_g2_i1	284.83	2	1.97725e-14	-0.451898	Downregulated	SA-p vs SA
TRINITY_DN586_c0_g3_i1	409	1	1.66062e-21	-0.585346	Downregulated	SA-p vs SA
TRINITY_DN587_c0_g2_i1	292	1	3.09211e-16	-0.542722	Downregulated	SA-p vs SA
TRINITY_DN587_c0_g3_i1	403	1	2.77182e-21	-0.583477	Downregulated	SA-p vs SA
TRINITY_DN59_c0_g1_i10	43896.9	46.69	1.94379e-143	-0.690635	Downregulated	SA-p vs SA
TRINITY_DN59_c0_g1_i6	6257.18	32.94	7.27515e-72	-0.488335	Downregulated	SA-p vs SA
TRINITY_DN59_c0_g1_i7	37060.7	48.37	1.34559e-135	-0.66475	Downregulated	SA-p vs SA
TRINITY_DN594_c2_g1_i2	54	1	0.00188767	-0.329228	Downregulated	SA-p vs SA
TRINITY_DN595_c0_g2_i1	2574	34	1.11437e-40	-0.371967	Downregulated	SA-p vs SA
TRINITY_DN597_c0_g2_i1	3307	8	2.04922e-68	-0.586692	Downregulated	SA-p vs SA
TRINITY_DN597_c1_g1_i1	1464.77	2	1.54411e-49	-0.659041	Downregulated	SA-p vs SA
TRINITY_DN597_c1_g2_i1	160	1	9.57528e-10	-0.466625	Downregulated	SA-p vs SA
TRINITY_DN598_c0_g3_i1	329	1	7.57613e-18	-0.557814	Downregulated	SA-p vs SA
TRINITY_DN5987_c0_g1_i1	11	16	2.84737e-05	0.222756	Upregulated	SA-p vs SA
TRINITY_DN599_c0_g1_i3	19.54	3.2	0.81105	-0.0535099	Nonsignificant	SA-p vs SA
TRINITY_DN599_c0_g2_i1	11	16	2.84737e-05	0.222756	Upregulated	SA-p vs SA
TRINITY_DN6_c0_g1_i8	9939.98	115240	1.97804e-121	0.48533	Upregulated	SA-p vs SA
TRINITY_DN6_c0_g2_i2	131695	66	1.45168e-181	-0.785825	Downregulated	SA-p vs SA
TRINITY_DN60_c0_g1_i11	1482	3	2.39109e-48	-0.609231	Downregulated	SA-p vs SA
TRINITY_DN60_c1_g2_i10	123	1	1.71009e-07	-0.433358	Downregulated	SA-p vs SA
TRINITY_DN602_c0_g2_i1	4877.03	6.25	6.45629e-85	-0.667062	Downregulated	SA-p vs SA
TRINITY_DN602_c0_g2_i4	2652.23	3.75	1.2883e-65	-0.654626	Downregulated	SA-p vs SA
TRINITY_DN602_c0_g3_i1	474.05	3	3.2331e-21	-0.465048	Downregulated	SA-p vs SA
TRINITY_DN6029_c0_g4_i1	1	5948	2.49013e-197	1.2747	Upregulated	SA-p vs SA
TRINITY_DN6029_c0_g6_i1	1	36062	1.98404e-275	1.50267	Upregulated	SA-p vs SA
TRINITY_DN605_c1_g4_i5	12	27.96	2.41281e-10	0.282358	Upregulated	SA-p vs SA
TRINITY_DN606_c0_g1_i1	420	1	4.65984e-22	-0.588703	Downregulated	SA-p vs SA
TRINITY_DN608_c1_g1_i1	20	30185	1.02526e-267	1.10122	Upregulated	SA-p vs SA
TRINITY_DN61_c0_g6_i1	33	45575	1.35255e-285	1.09	Upregulated	SA-p vs SA
TRINITY_DN610_c0_g1_i1	1	9254	1.86997e-216	1.33062	Upregulated	SA-p vs SA
TRINITY_DN610_c0_g3_i1	11	9337	7.48836e-217	1.02842	Upregulated	SA-p vs SA
TRINITY_DN6117_c0_g1_i2	8611.83	5	5.11228e-108	-0.767213	Downregulated	SA-p vs SA
TRINITY_DN612_c0_g2_i2	645.61	1	2.3579e-30	-0.643089	Downregulated	SA-p vs SA
TRINITY_DN612_c0_g4_i1	2335	1	5.67658e-66	-0.805707	Downregulated	SA-p vs SA
TRINITY_DN6144_c0_g2_i1	850	1	1.71427e-36	-0.67788	Downregulated	SA-p vs SA
TRINITY_DN6144_c0_g3_i1	228	1	2.34453e-13	-0.511426	Downregulated	SA-p vs SA
TRINITY_DN616_c0_g1_i1	1029	3	3.14639e-38	-0.563085	Downregulated	SA-p vs SA
TRINITY_DN616_c0_g2_i2	12778.9	12	1.91017e-116	-0.706394	Downregulated	SA-p vs SA
TRINITY_DN616_c0_g3_i1	2653.22	2	2.86514e-68	-0.734189	Downregulated	SA-p vs SA
TRINITY_DN617_c0_g1_i1	674	3	2.33935e-28	-0.509563	Downregulated	SA-p vs SA
TRINITY_DN6199_c0_g2_i1	45	56817	6.16748e-286	1.07865	Upregulated	SA-p vs SA
TRINITY_DN62_c0_g1_i10	1719	29	1.32935e-31	-0.341019	Downregulated	SA-p vs SA
TRINITY_DN62_c0_g1_i11	2505.63	2	3.08234e-66	-0.726949	Downregulated	SA-p vs SA
TRINITY_DN62_c0_g1_i12	7568.14	11.37	5.52402e-96	-0.646951	Downregulated	SA-p vs SA
TRINITY_DN62_c0_g1_i13	343.41	1	1.08222e-18	-0.563236	Downregulated	SA-p vs SA
TRINITY_DN62_c0_g1_i3	8566.75	24960.6	2.19615e-65	0.310635	Upregulated	SA-p vs SA
TRINITY_DN62_c0_g1_i9	96	23	0.487333	-0.00538368	Nonsignificant	SA-p vs SA
TRINITY_DN621_c0_g1_i2	125	4	4.68616e-05	-0.260039	Downregulated	SA-p vs SA
TRINITY_DN621_c0_g1_i3	62	3	0.0126641	-0.207734	Downregulated	SA-p vs SA
TRINITY_DN621_c0_g1_i4	116	3	2.19364e-05	-0.286978	Downregulated	SA-p vs SA
TRINITY_DN621_c0_g1_i5	102	1	2.86969e-06	-0.409677	Downregulated	SA-p vs SA
TRINITY_DN628_c0_g1_i1	590	4	3.04099e-24	-0.456336	Downregulated	SA-p vs SA
TRINITY_DN630_c0_g1_i3	4957.22	6.91	3.77953e-84	-0.656426	Downregulated	SA-p vs SA
TRINITY_DN630_c0_g1_i4	1493.97	0.39	2.53579e-54	-0.868327	Downregulated	SA-p vs SA
TRINITY_DN630_c0_g1_i7	15913.6	4.09	2.02337e-134	-0.870298	Downregulated	SA-p vs SA
TRINITY_DN630_c0_g1_i8	2600.2	7.61	9.08622e-60	-0.562598	Downregulated	SA-p vs SA
TRINITY_DN6308_c0_g2_i1	232	1	1.22763e-13	-0.513626	Downregulated	SA-p vs SA
TRINITY_DN631_c0_g2_i2	3313.89	3	2.7614e-74	-0.711026	Downregulated	SA-p vs SA
TRINITY_DN6333_c1_g2_i1	62	1	0.000857787	-0.346703	Downregulated	SA-p vs SA
TRINITY_DN635_c0_g1_i1	115	38203	5.95397e-245	0.909757	Upregulated	SA-p vs SA
TRINITY_DN635_c2_g1_i1	13	1813	2.90807e-146	0.799966	Upregulated	SA-p vs SA
TRINITY_DN6374_c0_g1_i1	26	1	0.0884894	-0.236774	Nonsignificant	SA-p vs SA
TRINITY_DN64_c0_g1_i1	617	1	3.2931e-29	-0.637355	Downregulated	SA-p vs SA
TRINITY_DN64_c0_g2_i1	554.58	2.43	1.31816e-25	-0.51155	Downregulated	SA-p vs SA
TRINITY_DN64_c0_g2_i3	9086.42	7.57	2.23306e-106	-0.721535	Downregulated	SA-p vs SA
TRINITY_DN640_c0_g1_i1	875.74	2	1.00557e-35	-0.593974	Downregulated	SA-p vs SA
TRINITY_DN640_c0_g2_i2	37	1	0.0231566	-0.281404	Downregulated	SA-p vs SA
TRINITY_DN640_c1_g1_i2	156	1	1.96314e-09	-0.463423	Downregulated	SA-p vs SA
TRINITY_DN6406_c0_g2_i1	601	2	5.19502e-27	-0.546352	Downregulated	SA-p vs SA
TRINITY_DN6407_c0_g1_i2	1013.22	2	2.53813e-39	-0.61242	Downregulated	SA-p vs SA
TRINITY_DN6407_c0_g1_i9	789.21	1	4.98236e-35	-0.668494	Downregulated	SA-p vs SA
TRINITY_DN641_c1_g1_i1	914	1	1.42843e-38	-0.687063	Downregulated	SA-p vs SA
TRINITY_DN641_c1_g2_i1	797	2	1.08966e-33	-0.582057	Downregulated	SA-p vs SA
TRINITY_DN641_c1_g2_i2	2959	3	1.24976e-70	-0.696697	Downregulated	SA-p vs SA
TRINITY_DN6416_c0_g1_i1	15	8131	7.20923e-211	0.971696	Upregulated	SA-p vs SA
TRINITY_DN6421_c0_g2_i1	13	13652	2.62408e-233	1.05535	Upregulated	SA-p vs SA
TRINITY_DN643_c0_g1_i2	2907.93	4	2.00134e-68	-0.658105	Downregulated	SA-p vs SA
TRINITY_DN6443_c0_g1_i1	74	1	7.45732e-05	-0.369084	Downregulated	SA-p vs SA
TRINITY_DN6448_c0_g1_i3	3982.04	2.01	7.53254e-83	-0.784918	Downregulated	SA-p vs SA
TRINITY_DN6448_c0_g1_i4	38.27	2.99	0.195373	-0.147126	Nonsignificant	SA-p vs SA
TRINITY_DN645_c0_g1_i1	16	1	0.355755	-0.17536	Nonsignificant	SA-p vs SA
TRINITY_DN65_c0_g1_i4	8	21847.1	1.09399e-253	1.17624	Upregulated	SA-p vs SA
TRINITY_DN651_c2_g1_i1	305	1	5.33418e-17	-0.548232	Downregulated	SA-p vs SA
TRINITY_DN6520_c0_g1_i1	20	365	7.54626e-80	0.542722	Upregulated	SA-p vs SA
TRINITY_DN6536_c0_g1_i1	41	46	3.46905e-10	0.189915	Upregulated	SA-p vs SA
TRINITY_DN657_c2_g1_i1	3	19328	2.25802e-248	1.28481	Upregulated	SA-p vs SA
TRINITY_DN658_c0_g1_i1	125	1	1.71009e-07	-0.435399	Downregulated	SA-p vs SA
TRINITY_DN66_c0_g1_i2	103.2	1	2.86969e-06	-0.411157	Downregulated	SA-p vs SA
TRINITY_DN6628_c0_g2_i2	72.13	1	0.000112452	-0.365846	Downregulated	SA-p vs SA
TRINITY_DN6638_c0_g1_i1	187	257	4.28968e-28	0.215581	Upregulated	SA-p vs SA
TRINITY_DN667_c0_g2_i2	433.54	4	1.76696e-18	-0.417358	Downregulated	SA-p vs SA
TRINITY_DN668_c0_g1_i1	1304	1	4.29708e-48	-0.732015	Downregulated	SA-p vs SA
TRINITY_DN6689_c0_g1_i4	7432	1	1.79172e-107	-0.952161	Downregulated	SA-p vs SA
TRINITY_DN67_c0_g1_i2	12	1	0.731885	-0.138969	Nonsignificant	SA-p vs SA
TRINITY_DN671_c0_g1_i1	26	32	2.86567e-08	0.201625	Upregulated	SA-p vs SA
TRINITY_DN671_c1_g1_i1	54	53	3.28553e-10	0.172995	Upregulated	SA-p vs SA
TRINITY_DN673_c0_g1_i3	43.87	144240	0	1.19972	Upregulated	SA-p vs SA
TRINITY_DN673_c0_g1_i5	295.16	19.09	3.06913e-05	-0.171029	Downregulated	SA-p vs SA
TRINITY_DN673_c0_g3_i1	234	2	2.34669e-12	-0.427032	Downregulated	SA-p vs SA
TRINITY_DN674_c0_g1_i4	23.57	1	0.13207	-0.224362	Nonsignificant	SA-p vs SA
TRINITY_DN6761_c0_g11_i1	13	2042	2.40956e-151	0.815012	Upregulated	SA-p vs SA
TRINITY_DN678_c0_g1_i6	22.45	1	0.194536	-0.218204	Nonsignificant	SA-p vs SA
TRINITY_DN679_c0_g2_i6	582.51	2	8.45714e-27	-0.542399	Downregulated	SA-p vs SA
TRINITY_DN680_c0_g4_i1	32	2119	5.32977e-153	0.705749	Upregulated	SA-p vs SA
TRINITY_DN680_c1_g1_i2	11	21361	1.02906e-252	1.13311	Upregulated	SA-p vs SA
TRINITY_DN6816_c0_g1_i1	211	1	3.2101e-12	-0.501625	Downregulated	SA-p vs SA
TRINITY_DN6820_c0_g1_i2	18	24	3.78178e-07	0.21175	Upregulated	SA-p vs SA
TRINITY_DN6859_c0_g1_i1	423	2	9.80319e-21	-0.501924	Downregulated	SA-p vs SA
TRINITY_DN6869_c0_g1_i1	19	23	9.25093e-07	0.199527	Upregulated	SA-p vs SA
TRINITY_DN6869_c0_g2_i1	19	41	3.27859e-14	0.272651	Upregulated	SA-p vs SA
TRINITY_DN687_c0_g1_i1	11	1	0.731885	-0.127963	Nonsignificant	SA-p vs SA
TRINITY_DN688_c0_g1_i1	740	1	2.67236e-33	-0.66035	Downregulated	SA-p vs SA
TRINITY_DN689_c0_g2_i1	18	21783	1.45105e-253	1.07329	Upregulated	SA-p vs SA
TRINITY_DN6907_c0_g1_i1	1257	2	3.01245e-45	-0.639691	Downregulated	SA-p vs SA
TRINITY_DN693_c0_g1_i1	22	4	1	-0.0402829	Nonsignificant	SA-p vs SA
TRINITY_DN693_c0_g2_i1	53	9	0.89174	-0.048925	Nonsignificant	SA-p vs SA
TRINITY_DN6943_c0_g1_i1	6517	1	9.09099e-103	-0.935542	Downregulated	SA-p vs SA
TRINITY_DN6944_c0_g1_i6	3736.83	7	7.66787e-74	-0.619041	Downregulated	SA-p vs SA
TRINITY_DN6945_c0_g2_i1	52	7139	9.32327e-194	0.797979	Upregulated	SA-p vs SA
TRINITY_DN695_c0_g1_i3	44	4	0.250097	-0.127963	Nonsignificant	SA-p vs SA
TRINITY_DN698_c0_g5_i1	6	2015	9.59575e-151	0.911133	Upregulated	SA-p vs SA
TRINITY_DN698_c0_g8_i2	1	1326.14	7.17286e-133	1.08486	Upregulated	SA-p vs SA
TRINITY_DN6994_c1_g2_i1	242	1	1.08239e-13	-0.518965	Downregulated	SA-p vs SA
TRINITY_DN6996_c0_g2_i1	4	63063	1.09382e-299	1.39801	Upregulated	SA-p vs SA
TRINITY_DN7_c0_g1_i1	7975.95	14.29	2.74195e-95	-0.624675	Downregulated	SA-p vs SA
TRINITY_DN7_c0_g1_i3	2509.44	0.89	5.65261e-68	-0.829562	Downregulated	SA-p vs SA
TRINITY_DN7_c0_g1_i5	14643.5	14.51	6.7626e-119	-0.699596	Downregulated	SA-p vs SA
TRINITY_DN7_c0_g1_i8	609.16	1.31	6.10839e-29	-0.601581	Downregulated	SA-p vs SA
TRINITY_DN70_c0_g2_i1	13	3431	1.27874e-173	0.880653	Upregulated	SA-p vs SA
TRINITY_DN70_c0_g3_i1	8	2938	6.23307e-167	0.922445	Upregulated	SA-p vs SA
TRINITY_DN70_c0_g4_i1	11	8454	1.49538e-212	1.01586	Upregulated	SA-p vs SA
TRINITY_DN70_c1_g1_i12	26.65	11527.9	5.44622e-226	0.943152	Upregulated	SA-p vs SA
TRINITY_DN70_c1_g1_i2	29.35	4338.55	9.20443e-184	0.80733	Upregulated	SA-p vs SA
TRINITY_DN70_c1_g1_i3	24	21257	1.65939e-252	1.0338	Upregulated	SA-p vs SA
TRINITY_DN70_c1_g2_i1	6	8067	1.60784e-210	1.0866	Upregulated	SA-p vs SA
TRINITY_DN707_c0_g1_i2	54	2	0.00841274	-0.241548	Downregulated	SA-p vs SA
TRINITY_DN71_c0_g2_i1	1	14872	5.21317e-237	1.39063	Upregulated	SA-p vs SA
TRINITY_DN710_c0_g1_i1	6005	3	1.1611e-96	-0.786223	Downregulated	SA-p vs SA
TRINITY_DN710_c1_g1_i2	1659	4	1.76213e-50	-0.587112	Downregulated	SA-p vs SA
TRINITY_DN710_c2_g1_i1	831	2	2.78582e-34	-0.587341	Downregulated	SA-p vs SA
TRINITY_DN711_c0_g1_i5	3082.91	8.32	7.18834e-66	-0.572855	Downregulated	SA-p vs SA
TRINITY_DN711_c0_g1_i8	416.95	1.68	2.04888e-20	-0.522157	Downregulated	SA-p vs SA
TRINITY_DN7118_c2_g2_i1	1	13682	2.1525e-233	1.38008	Upregulated	SA-p vs SA
TRINITY_DN712_c0_g1_i1	533	1	3.16028e-26	-0.618843	Downregulated	SA-p vs SA
TRINITY_DN712_c1_g1_i10	6865.5	45	6.50111e-69	-0.460608	Downregulated	SA-p vs SA
TRINITY_DN7129_c0_g1_i1	114	2	6.58386e-06	-0.336067	Downregulated	SA-p vs SA
TRINITY_DN7142_c0_g1_i1	1	1015	1.48636e-121	1.05104	Upregulated	SA-p vs SA
TRINITY_DN7156_c0_g2_i4	294.44	1	2.30313e-16	-0.543775	Downregulated	SA-p vs SA
TRINITY_DN7156_c0_g3_i1	2123	1	1.27599e-62	-0.793667	Downregulated	SA-p vs SA
TRINITY_DN7164_c0_g2_i2	12622	4	9.32221e-125	-0.8438	Downregulated	SA-p vs SA
TRINITY_DN7164_c1_g1_i1	829.87	1	6.68306e-36	-0.674848	Downregulated	SA-p vs SA
TRINITY_DN719_c0_g2_i1	39.25	1.4	0.0153481	-0.246309	Downregulated	SA-p vs SA
TRINITY_DN719_c0_g2_i2	2236.75	1.6	9.72693e-63	-0.740817	Downregulated	SA-p vs SA
TRINITY_DN72_c0_g2_i2	24	475754	0	1.42698	Upregulated	SA-p vs SA
TRINITY_DN7208_c0_g4_i1	81436	192	2.10801e-126	-0.589946	Downregulated	SA-p vs SA
TRINITY_DN721_c0_g1_i1	61	1	0.000857787	-0.344646	Downregulated	SA-p vs SA
TRINITY_DN7211_c1_g3_i1	1	3524	9.65895e-175	1.20849	Upregulated	SA-p vs SA
TRINITY_DN7230_c0_g1_i3	25.01	37.31	2.22191e-10	0.225956	Upregulated	SA-p vs SA
TRINITY_DN7230_c0_g1_i6	37.55	73.8	6.42451e-20	0.26083	Upregulated	SA-p vs SA
TRINITY_DN726_c0_g2_i1	123	1	1.71009e-07	-0.433358	Downregulated	SA-p vs SA
TRINITY_DN7260_c0_g1_i1	13	17694	1.50908e-244	1.08815	Upregulated	SA-p vs SA
TRINITY_DN727_c0_g1_i1	2444	1	5.11853e-67	-0.811479	Downregulated	SA-p vs SA
TRINITY_DN7298_c0_g1_i1	1	4090	3.64087e-181	1.22733	Upregulated	SA-p vs SA
TRINITY_DN73_c0_g1_i1	3	6769	6.30998e-203	1.15209	Upregulated	SA-p vs SA
TRINITY_DN73_c0_g7_i1	1	4094	3.30897e-181	1.22745	Upregulated	SA-p vs SA
TRINITY_DN73_c0_g9_i1	1	4205	2.31327e-182	1.23084	Upregulated	SA-p vs SA
TRINITY_DN732_c0_g1_i1	857.16	1	8.73999e-37	-0.678941	Downregulated	SA-p vs SA
TRINITY_DN732_c0_g3_i1	718	2	6.89059e-31	-0.568852	Downregulated	SA-p vs SA
TRINITY_DN734_c0_g1_i1	1200	5	6.86115e-40	-0.517915	Downregulated	SA-p vs SA
TRINITY_DN735_c0_g2_i3	782.56	1	7.11149e-35	-0.667423	Downregulated	SA-p vs SA
TRINITY_DN736_c0_g1_i1	4912	8	1.95351e-82	-0.636739	Downregulated	SA-p vs SA
TRINITY_DN739_c0_g2_i12	830.1	1.98	3.29834e-34	-0.588475	Downregulated	SA-p vs SA
TRINITY_DN739_c0_g2_i7	1730.61	0.02	1.25632e-58	-1.26266	Downregulated	SA-p vs SA
TRINITY_DN739_c0_g3_i1	2130	1	9.8541e-63	-0.794084	Downregulated	SA-p vs SA
TRINITY_DN74_c0_g1_i7	85672	213	7.83454e-125	-0.583231	Downregulated	SA-p vs SA
TRINITY_DN740_c1_g1_i1	1	2213	9.53625e-155	1.14964	Upregulated	SA-p vs SA
TRINITY_DN744_c0_g4_i1	344742	870	5.49324e-130	-0.581342	Downregulated	SA-p vs SA
TRINITY_DN7446_c0_g1_i5	89.8	2	0.000148835	-0.305883	Downregulated	SA-p vs SA
TRINITY_DN745_c0_g3_i2	110.57	5	0.000674911	-0.216296	Downregulated	SA-p vs SA
TRINITY_DN746_c0_g1_i2	109	6	0.0023906	-0.191424	Downregulated	SA-p vs SA
TRINITY_DN7480_c0_g1_i1	12496	16	1.32701e-111	-0.667171	Downregulated	SA-p vs SA
TRINITY_DN75_c0_g1_i7	33	6782.13	4.81681e-203	0.849014	Upregulated	SA-p vs SA
TRINITY_DN75_c3_g1_i1	1	3261	2.1166e-171	1.19868	Upregulated	SA-p vs SA
TRINITY_DN751_c0_g1_i2	85.52	2	0.000142624	-0.299706	Downregulated	SA-p vs SA
TRINITY_DN753_c0_g2_i3	7333.12	92.17	8.07393e-54	-0.378249	Downregulated	SA-p vs SA
TRINITY_DN753_c0_g2_i4	6668.68	11.83	3.77147e-90	-0.625929	Downregulated	SA-p vs SA
TRINITY_DN7530_c0_g1_i1	30	42	2.5454e-11	0.217922	Upregulated	SA-p vs SA
TRINITY_DN7531_c0_g2_i7	313.35	1	1.67563e-17	-0.551649	Downregulated	SA-p vs SA
TRINITY_DN754_c0_g1_i1	50403	28	7.76942e-161	-0.772798	Downregulated	SA-p vs SA
TRINITY_DN7546_c0_g3_i2	9	15421.7	1.37323e-238	1.11728	Upregulated	SA-p vs SA
TRINITY_DN758_c0_g1_i10	7163.95	0.95	1.43051e-106	-0.954003	Downregulated	SA-p vs SA
TRINITY_DN758_c0_g1_i3	13045.8	9.82	5.42638e-119	-0.734368	Downregulated	SA-p vs SA
TRINITY_DN758_c0_g1_i6	10902.4	0.23	2.3565e-124	-1.18654	Downregulated	SA-p vs SA
TRINITY_DN759_c0_g1_i1	855	5	3.3317e-31	-0.475036	Downregulated	SA-p vs SA
TRINITY_DN76_c0_g1_i11	535.44	0.05	2.11198e-29	-0.998364	Downregulated	SA-p vs SA
TRINITY_DN76_c0_g1_i2	4334.56	1.95	1.49092e-85	-0.799481	Downregulated	SA-p vs SA
TRINITY_DN76_c0_g1_i5	913.69	3	2.22953e-35	-0.548051	Downregulated	SA-p vs SA
TRINITY_DN76_c0_g2_i4	475.57	1	2.81292e-24	-0.604422	Downregulated	SA-p vs SA
TRINITY_DN760_c0_g1_i2	128.25	1.14	8.08101e-08	-0.422071	Downregulated	SA-p vs SA
TRINITY_DN760_c0_g1_i3	2872.4	1.14	6.60373e-73	-0.815335	Downregulated	SA-p vs SA
TRINITY_DN760_c0_g1_i5	14.34	0.72	0.517394	-0.203058	Nonsignificant	SA-p vs SA
TRINITY_DN7606_c0_g1_i5	594.88	2	9.60081e-27	-0.545057	Downregulated	SA-p vs SA
TRINITY_DN761_c1_g1_i2	6953	3	5.53435e-102	-0.804765	Downregulated	SA-p vs SA
TRINITY_DN763_c0_g2_i3	187	1	4.27624e-11	-0.48635	Downregulated	SA-p vs SA
TRINITY_DN763_c0_g3_i1	165	1	4.68161e-10	-0.470518	Downregulated	SA-p vs SA
TRINITY_DN765_c0_g1_i1	1	1775	2.64496e-145	1.12174	Upregulated	SA-p vs SA
TRINITY_DN765_c0_g2_i1	1	2185	3.35287e-154	1.14803	Upregulated	SA-p vs SA
TRINITY_DN766_c0_g1_i1	1601.69	2	6.36036e-52	-0.670345	Downregulated	SA-p vs SA
TRINITY_DN766_c0_g1_i5	11442.3	2	2.04186e-123	-0.919067	Downregulated	SA-p vs SA
TRINITY_DN78_c0_g1_i6	1	573	1.06479e-97	0.978716	Upregulated	SA-p vs SA
TRINITY_DN7812_c0_g1_i1	18	61843	7.67119e-299	1.20528	Upregulated	SA-p vs SA
TRINITY_DN784_c0_g1_i1	2940	3	2.24485e-70	-0.695883	Downregulated	SA-p vs SA
TRINITY_DN787_c0_g1_i1	116	1	2.80934e-07	-0.425947	Downregulated	SA-p vs SA
TRINITY_DN791_c0_g1_i5	54	1	0.00188767	-0.329228	Downregulated	SA-p vs SA
TRINITY_DN791_c0_g1_i8	489	1	6.85812e-25	-0.607944	Downregulated	SA-p vs SA
TRINITY_DN791_c0_g2_i3	652.68	0.86	1.29499e-30	-0.663545	Downregulated	SA-p vs SA
TRINITY_DN791_c0_g2_i5	1113.67	2.14	1.34056e-41	-0.615818	Downregulated	SA-p vs SA
TRINITY_DN7917_c0_g1_i1	1219	1	5.06243e-46	-0.723488	Downregulated	SA-p vs SA
TRINITY_DN792_c0_g1_i1	1	2361.98	1.54293e-157	1.15788	Upregulated	SA-p vs SA
TRINITY_DN793_c0_g1_i8	77.75	30	0.0154866	0.0548979	Upregulated	SA-p vs SA
TRINITY_DN794_c0_g1_i1	52	1	0.00285251	-0.324454	Downregulated	SA-p vs SA
TRINITY_DN797_c0_g1_i1	617.95	1	2.68231e-29	-0.63755	Downregulated	SA-p vs SA
TRINITY_DN797_c0_g1_i10	475.75	4	2.39595e-20	-0.42911	Downregulated	SA-p vs SA
TRINITY_DN797_c0_g1_i3	4701.23	6	1.68569e-83	-0.667582	Downregulated	SA-p vs SA
TRINITY_DN799_c0_g1_i1	62	5	0.095186	-0.143117	Nonsignificant	SA-p vs SA
TRINITY_DN8_c0_g1_i1	15633	20	2.84116e-117	-0.667276	Downregulated	SA-p vs SA
TRINITY_DN80_c0_g1_i20	37	1	0.0231566	-0.281404	Downregulated	SA-p vs SA
TRINITY_DN80_c0_g1_i34	18.7	12	0.0131976	0.119244	Upregulated	SA-p vs SA
TRINITY_DN80_c0_g1_i52	24.92	876	1.43242e-115	0.625644	Upregulated	SA-p vs SA
TRINITY_DN80_c0_g1_i80	1869	34	1.95561e-31	-0.331481	Downregulated	SA-p vs SA
TRINITY_DN80_c0_g1_i84	1315.8	2.49	1.13878e-46	-0.617755	Downregulated	SA-p vs SA
TRINITY_DN8020_c0_g3_i1	462	1	1.49383e-23	-0.60076	Downregulated	SA-p vs SA
TRINITY_DN8041_c1_g1_i1	18	965	1.46375e-119	0.679032	Upregulated	SA-p vs SA
TRINITY_DN8045_c1_g2_i1	1	594	3.71159e-99	0.983269	Upregulated	SA-p vs SA
TRINITY_DN81_c1_g1_i12	442.52	4	7.05564e-19	-0.419951	Downregulated	SA-p vs SA
TRINITY_DN8147_c0_g1_i1	2	6853	1.85898e-203	1.20494	Upregulated	SA-p vs SA
TRINITY_DN8148_c0_g3_i4	43021.3	14	1.54985e-165	-0.840447	Downregulated	SA-p vs SA
TRINITY_DN817_c1_g1_i1	953	2	1.51607e-37	-0.604669	Downregulated	SA-p vs SA
TRINITY_DN8196_c0_g2_i1	1	5718	1.25564e-195	1.26972	Upregulated	SA-p vs SA
TRINITY_DN82_c0_g1_i1	21	14322	2.182e-235	1.00074	Upregulated	SA-p vs SA
TRINITY_DN821_c1_g1_i4	198	1	7.74274e-12	-0.493581	Downregulated	SA-p vs SA
TRINITY_DN8224_c0_g2_i5	12	16	1.73427e-05	0.21175	Upregulated	SA-p vs SA
TRINITY_DN8231_c0_g1_i1	1	21680	2.36543e-253	1.43831	Upregulated	SA-p vs SA
TRINITY_DN8231_c0_g4_i1	13	8063	1.66085e-210	0.988735	Upregulated	SA-p vs SA
TRINITY_DN828_c0_g2_i8	129.37	2	1.31272e-06	-0.352066	Downregulated	SA-p vs SA
TRINITY_DN828_c1_g1_i1	515.9	2	5.32082e-24	-0.527039	Downregulated	SA-p vs SA
TRINITY_DN83_c0_g2_i2	53690.1	78	3.71361e-138	-0.651195	Downregulated	SA-p vs SA
TRINITY_DN83_c0_g3_i1	4617	5	8.57136e-84	-0.688357	Downregulated	SA-p vs SA
TRINITY_DN83_c0_g4_i1	671	4	8.12125e-27	-0.472609	Downregulated	SA-p vs SA
TRINITY_DN83_c2_g1_i1	208	1	4.46631e-12	-0.499813	Downregulated	SA-p vs SA
TRINITY_DN8305_c0_g1_i1	61	16961	4.19297e-227	0.887249	Upregulated	SA-p vs SA
TRINITY_DN832_c0_g1_i1	1253	2	3.42415e-45	-0.639288	Downregulated	SA-p vs SA
TRINITY_DN8324_c0_g2_i1	32	5908	4.38332e-197	0.835453	Upregulated	SA-p vs SA
TRINITY_DN835_c0_g5_i1	36	9755	4.62892e-215	0.883987	Upregulated	SA-p vs SA
TRINITY_DN8356_c0_g2_i1	9	2064	8.79062e-152	0.862883	Upregulated	SA-p vs SA
TRINITY_DN8358_c0_g1_i1	172	2	3.57751e-09	-0.388094	Downregulated	SA-p vs SA
TRINITY_DN8363_c0_g3_i1	46	6529.83	3.26469e-192	0.802206	Upregulated	SA-p vs SA
TRINITY_DN8370_c0_g1_i1	18	4717	2.38815e-187	0.879755	Upregulated	SA-p vs SA
TRINITY_DN8370_c0_g2_i1	17	7137	3.12059e-205	0.939369	Upregulated	SA-p vs SA
TRINITY_DN839_c0_g2_i1	14	12425	3.15939e-229	1.03406	Upregulated	SA-p vs SA
TRINITY_DN84_c0_g1_i3	761	3	6.93632e-31	-0.52492	Downregulated	SA-p vs SA
TRINITY_DN840_c0_g1_i3	9808.47	60	1.06931e-75	-0.469343	Downregulated	SA-p vs SA
TRINITY_DN841_c0_g1_i3	15	1	0.355755	-0.167196	Nonsignificant	SA-p vs SA
TRINITY_DN844_c0_g1_i6	20	2	0.620334	-0.115906	Nonsignificant	SA-p vs SA
TRINITY_DN848_c0_g1_i1	5080	7	4.41218e-85	-0.657884	Downregulated	SA-p vs SA
TRINITY_DN8517_c0_g3_i4	79.19	4	0.00691861	-0.202299	Downregulated	SA-p vs SA
TRINITY_DN8517_c1_g1_i1	289	2	1.11799e-14	-0.453736	Downregulated	SA-p vs SA
TRINITY_DN8526_c0_g1_i1	177	1	1.69856e-10	-0.479398	Downregulated	SA-p vs SA
TRINITY_DN8526_c1_g3_i1	2505	18	9.74576e-50	-0.448979	Downregulated	SA-p vs SA
TRINITY_DN86_c0_g1_i3	2491.16	1.52	5.21127e-66	-0.760932	Downregulated	SA-p vs SA
TRINITY_DN86_c0_g1_i45	586.45	1.48	1.70424e-28	-0.58134	Downregulated	SA-p vs SA
TRINITY_DN86_c0_g2_i4	19987.9	40	3.28594e-114	-0.610682	Downregulated	SA-p vs SA
TRINITY_DN86_c0_g3_i1	1987	1	2.58877e-60	-0.785293	Downregulated	SA-p vs SA
TRINITY_DN862_c0_g1_i1	257	1	1.2137e-14	-0.526572	Downregulated	SA-p vs SA
TRINITY_DN864_c0_g1_i1	212	1	2.3088e-12	-0.502223	Downregulated	SA-p vs SA
TRINITY_DN864_c0_g2_i1	2794	3	1.59963e-68	-0.68944	Downregulated	SA-p vs SA
TRINITY_DN866_c0_g3_i1	4268	3	7.29021e-84	-0.743032	Downregulated	SA-p vs SA
TRINITY_DN8676_c0_g1_i3	120	1	3.62217e-07	-0.430235	Downregulated	SA-p vs SA
TRINITY_DN868_c1_g1_i1	1	2160	1.04131e-153	1.14657	Upregulated	SA-p vs SA
TRINITY_DN8689_c4_g1_i1	19	471	5.97615e-90	0.581462	Upregulated	SA-p vs SA
TRINITY_DN87_c0_g1_i1	1672.5	1	5.04408e-55	-0.763497	Downregulated	SA-p vs SA
TRINITY_DN87_c0_g1_i2	279.98	1	1.36262e-15	-0.537405	Downregulated	SA-p vs SA
TRINITY_DN873_c0_g1_i1	75	3.33	0.00318237	-0.218612	Downregulated	SA-p vs SA
TRINITY_DN875_c0_g1_i1	21	1	0.194536	-0.209758	Nonsignificant	SA-p vs SA
TRINITY_DN8763_c0_g1_i1	562	1	1.45645e-27	-0.625545	Downregulated	SA-p vs SA
TRINITY_DN877_c0_g1_i11	672	1	2.18881e-31	-0.648157	Downregulated	SA-p vs SA
TRINITY_DN877_c0_g1_i4	1682.16	6	4.07369e-48	-0.537577	Downregulated	SA-p vs SA
TRINITY_DN877_c1_g1_i1	21926	40	4.77603e-118	-0.622389	Downregulated	SA-p vs SA
TRINITY_DN877_c1_g2_i4	2615.5	0.5	2.66966e-71	-0.907737	Downregulated	SA-p vs SA
TRINITY_DN8778_c0_g2_i1	1	1233	8.65099e-130	1.07565	Upregulated	SA-p vs SA
TRINITY_DN8785_c0_g1_i3	1163.34	2	6.59176e-43	-0.629896	Downregulated	SA-p vs SA
TRINITY_DN8785_c1_g1_i1	540	3	1.59727e-23	-0.481524	Downregulated	SA-p vs SA
TRINITY_DN88_c0_g7_i1	2	5093	1.24578e-190	1.16739	Upregulated	SA-p vs SA
TRINITY_DN8846_c0_g1_i1	7	337	2.20716e-76	0.665424	Upregulated	SA-p vs SA
TRINITY_DN886_c0_g1_i2	355.9	2	8.63017e-18	-0.480076	Downregulated	SA-p vs SA
TRINITY_DN886_c1_g1_i1	625	6	1.90825e-23	-0.412336	Downregulated	SA-p vs SA
TRINITY_DN888_c0_g1_i1	1	8111	9.53115e-211	1.31394	Upregulated	SA-p vs SA
TRINITY_DN888_c0_g10_i1	26	2745	4.57321e-164	0.764756	Upregulated	SA-p vs SA
TRINITY_DN9_c0_g1_i1	8125.22	7167.99	8.69203e-25	0.159504	Upregulated	SA-p vs SA
TRINITY_DN9_c0_g1_i12	46457.9	57	6.54148e-141	-0.672569	Downregulated	SA-p vs SA
TRINITY_DN9_c0_g1_i17	42022.9	284.01	4.34356e-85	-0.456732	Downregulated	SA-p vs SA
TRINITY_DN9_c0_g1_i18	4526.56	5	5.02424e-83	-0.685855	Downregulated	SA-p vs SA
TRINITY_DN9_c1_g1_i3	432.56	38135	4.73713e-201	0.741952	Upregulated	SA-p vs SA
TRINITY_DN90_c0_g1_i11	1655	2	5.61774e-53	-0.674487	Downregulated	SA-p vs SA
TRINITY_DN90_c0_g1_i15	16467.9	11.41	8.22565e-128	-0.744852	Downregulated	SA-p vs SA
TRINITY_DN90_c0_g1_i22	1103.55	2.59	2.89775e-40	-0.590522	Downregulated	SA-p vs SA
TRINITY_DN90_c0_g1_i8	9714	15.01	4.38035e-102	-0.643394	Downregulated	SA-p vs SA
TRINITY_DN90_c0_g1_i9	19744.3	8	1.57633e-138	-0.812717	Downregulated	SA-p vs SA
TRINITY_DN9004_c0_g2_i1	1105	3	2.52226e-40	-0.572099	Downregulated	SA-p vs SA
TRINITY_DN902_c0_g2_i2	2	11816	4.84512e-227	1.27385	Upregulated	SA-p vs SA
TRINITY_DN903_c0_g1_i4	329.74	1	5.72638e-18	-0.558098	Downregulated	SA-p vs SA
TRINITY_DN903_c0_g2_i1	459.78	4	1.14802e-19	-0.424791	Downregulated	SA-p vs SA
TRINITY_DN9078_c1_g1_i1	3521	2	3.46142e-78	-0.769984	Downregulated	SA-p vs SA
TRINITY_DN91_c0_g5_i1	14	62148	4.70127e-299	1.23769	Upregulated	SA-p vs SA
TRINITY_DN91_c6_g1_i1	1	2364	1.40803e-157	1.15799	Upregulated	SA-p vs SA
TRINITY_DN9132_c0_g1_i2	1	3199.18	1.40628e-170	1.19626	Upregulated	SA-p vs SA
TRINITY_DN9132_c0_g2_i1	10	33391	4.30849e-272	1.20167	Upregulated	SA-p vs SA
TRINITY_DN914_c0_g1_i1	670	2	1.10829e-29	-0.5601	Downregulated	SA-p vs SA
TRINITY_DN917_c0_g1_i1	585	1	1.70424e-28	-0.630619	Downregulated	SA-p vs SA
TRINITY_DN9174_c1_g1_i1	19	3903	3.4986e-179	0.848954	Upregulated	SA-p vs SA
TRINITY_DN9177_c0_g1_i1	519	2	4.26593e-24	-0.527796	Downregulated	SA-p vs SA
TRINITY_DN918_c0_g2_i1	55.37	1.47	0.00124544	-0.283663	Downregulated	SA-p vs SA
TRINITY_DN918_c0_g2_i2	4186.33	1.53	3.25365e-84	-0.825763	Downregulated	SA-p vs SA
TRINITY_DN918_c0_g3_i1	420	1	4.65984e-22	-0.588703	Downregulated	SA-p vs SA
TRINITY_DN9187_c0_g1_i1	1	175	1.04226e-51	0.82868	Upregulated	SA-p vs SA
TRINITY_DN919_c0_g1_i1	131	1	5.55759e-08	-0.441329	Downregulated	SA-p vs SA
TRINITY_DN919_c0_g3_i5	3996.1	7.64	5.14723e-75	-0.616459	Downregulated	SA-p vs SA
TRINITY_DN919_c0_g3_i9	6659.64	9.36	5.11329e-93	-0.655382	Downregulated	SA-p vs SA
TRINITY_DN92_c0_g1_i1	776.86	10	3.1056e-24	-0.375233	Downregulated	SA-p vs SA
TRINITY_DN92_c0_g2_i1	1365.87	2.94	9.8605e-46	-0.601465	Downregulated	SA-p vs SA
TRINITY_DN92_c0_g2_i2	195.83	1.06	1.08822e-11	-0.484816	Downregulated	SA-p vs SA
TRINITY_DN92_c0_g3_i2	2413.4	2	6.94912e-65	-0.722205	Downregulated	SA-p vs SA
TRINITY_DN9313_c0_g2_i1	872	3	4.6087e-34	-0.542144	Downregulated	SA-p vs SA
TRINITY_DN9391_c0_g1_i1	4759	1	6.66287e-91	-0.895775	Downregulated	SA-p vs SA
TRINITY_DN940_c0_g1_i2	13	2	1	-0.0614144	Nonsignificant	SA-p vs SA
TRINITY_DN940_c0_g1_i7	943	10	9.90567e-29	-0.399748	Downregulated	SA-p vs SA
TRINITY_DN9433_c0_g1_i1	35	3	0.257411	-0.135406	Nonsignificant	SA-p vs SA
TRINITY_DN945_c0_g1_i2	551.86	2	1.63293e-25	-0.535562	Downregulated	SA-p vs SA
TRINITY_DN946_c0_g2_i2	2631.29	4	2.62302e-65	-0.645459	Downregulated	SA-p vs SA
TRINITY_DN9460_c0_g1_i1	15	306	7.70573e-73	0.55681	Upregulated	SA-p vs SA
TRINITY_DN95_c0_g2_i1	8	11876	2.89227e-227	1.09913	Upregulated	SA-p vs SA
TRINITY_DN95_c0_g3_i1	1	8354	5.03639e-212	1.31767	Upregulated	SA-p vs SA
TRINITY_DN950_c0_g1_i1	24156	11	6.58966e-144	-0.797944	Downregulated	SA-p vs SA
TRINITY_DN950_c0_g2_i2	1942.68	4	3.12381e-55	-0.60708	Downregulated	SA-p vs SA
TRINITY_DN950_c1_g1_i1	458	2	6.47549e-22	-0.51198	Downregulated	SA-p vs SA
TRINITY_DN9523_c0_g1_i1	2	10226	8.81161e-221	1.25557	Upregulated	SA-p vs SA
TRINITY_DN955_c0_g1_i1	14	22	1.27111e-07	0.232533	Upregulated	SA-p vs SA
TRINITY_DN9551_c0_g1_i1	0.31	223.28	2.37717e-60	1.00765	Upregulated	SA-p vs SA
TRINITY_DN9551_c0_g1_i3	9.69	105.34	1.81724e-36	0.477189	Upregulated	SA-p vs SA
TRINITY_DN956_c0_g2_i1	20.33	1.41	0.282135	-0.162194	Nonsignificant	SA-p vs SA
TRINITY_DN956_c0_g2_i3	1568.38	3.59	1.16917e-48	-0.593686	Downregulated	SA-p vs SA
TRINITY_DN9630_c1_g1_i2	51	11469.3	2.97846e-214	0.860407	Upregulated	SA-p vs SA
TRINITY_DN9630_c2_g1_i1	1	3739	2.68742e-177	1.21598	Upregulated	SA-p vs SA
TRINITY_DN965_c1_g1_i2	5478	30	1.13113e-68	-0.483339	Downregulated	SA-p vs SA
TRINITY_DN968_c0_g1_i2	7489.28	0.64	9.03802e-108	-1.00959	Downregulated	SA-p vs SA
TRINITY_DN968_c0_g1_i4	1140.72	1.36	5.71463e-44	-0.676197	Downregulated	SA-p vs SA
TRINITY_DN97_c0_g1_i3	1	2589.09	1.76352e-161	1.16949	Upregulated	SA-p vs SA
TRINITY_DN97_c0_g1_i5	13	14539.3	4.90858e-236	1.06331	Upregulated	SA-p vs SA
TRINITY_DN97_c0_g3_i1	14	13313	3.22868e-232	1.04279	Upregulated	SA-p vs SA
TRINITY_DN97_c0_g5_i1	1	3887	5.714e-179	1.22089	Upregulated	SA-p vs SA
TRINITY_DN9721_c0_g1_i1	201	1	3.92816e-12	-0.495483	Downregulated	SA-p vs SA
TRINITY_DN9743_c0_g1_i1	12	284	6.88103e-70	0.575599	Upregulated	SA-p vs SA
TRINITY_DN9761_c0_g2_i3	730	3	7.0095e-30	-0.51966	Downregulated	SA-p vs SA
TRINITY_DN9781_c1_g1_i2	19	2062.23	8.79062e-152	0.768255	Upregulated	SA-p vs SA
TRINITY_DN9781_c1_g1_i7	5.45	5524.68	3.76445e-194	1.05088	Upregulated	SA-p vs SA
TRINITY_DN9781_c1_g1_i8	0.55	915.54	3.12928e-117	1.11362	Upregulated	SA-p vs SA
TRINITY_DN979_c0_g1_i2	2912.19	2	1.14007e-71	-0.74597	Downregulated	SA-p vs SA
TRINITY_DN9797_c0_g3_i1	1	4078	4.90461e-181	1.22696	Upregulated	SA-p vs SA
TRINITY_DN98_c0_g1_i1	8	4082	4.27049e-181	0.964044	Upregulated	SA-p vs SA
TRINITY_DN982_c0_g1_i1	6696	8	1.4476e-94	-0.675931	Downregulated	SA-p vs SA
TRINITY_DN982_c0_g2_i1	257	1	1.2137e-14	-0.526572	Downregulated	SA-p vs SA
TRINITY_DN983_c0_g1_i1	11	1	0.731885	-0.127963	Nonsignificant	SA-p vs SA
TRINITY_DN9832_c0_g3_i3	3	1530.17	5.66009e-139	0.963996	Upregulated	SA-p vs SA
TRINITY_DN9832_c1_g4_i1	1	3229	5.61684e-171	1.19743	Upregulated	SA-p vs SA
TRINITY_DN984_c0_g1_i1	2131	4	2.14437e-58	-0.618784	Downregulated	SA-p vs SA
TRINITY_DN984_c1_g1_i1	1017	3	6.52318e-38	-0.561601	Downregulated	SA-p vs SA
TRINITY_DN986_c0_g2_i4	398.66	5	4.27862e-16	-0.378521	Downregulated	SA-p vs SA
TRINITY_DN986_c0_g3_i1	290	2	1.11799e-14	-0.454173	Downregulated	SA-p vs SA
TRINITY_DN988_c0_g1_i3	1	15060	1.49047e-237	1.39222	Upregulated	SA-p vs SA
TRINITY_DN990_c0_g2_i2	1900.67	1	2.2674e-59	-0.779674	Downregulated	SA-p vs SA
TRINITY_DN992_c0_g1_i1	931	1	3.96126e-39	-0.689394	Downregulated	SA-p vs SA
TRINITY_DN992_c0_g2_i1	1173	1	8.40428e-45	-0.718622	Downregulated	SA-p vs SA
TRINITY_DN992_c1_g1_i1	402	1	3.58416e-21	-0.583163	Downregulated	SA-p vs SA
TRINITY_DN9960_c0_g2_i1	186	85	1.87134e-05	0.0763017	Upregulated	SA-p vs SA
TRINITY_DN9990_c0_g3_i1	1	30881.7	1.06275e-268	1.48306	Upregulated	SA-p vs SA
TRINITY_DN14525_c0_g1_i1	5	10	1.32796e-238	0.263039	Upregulated	SA-p vs SA
TRINITY_DN16080_c1_g1_i1	4	9	1.02142e-116	0.277938	Upregulated	SA-p vs SA
TRINITY_DN28495_c0_g1_i1	8	8	0.236079	0.175359	Nonsignificant	SA-p vs SA
TRINITY_DN32746_c0_g1_i1	3	5	7.52195e-118	0.239976	Upregulated	SA-p vs SA
TRINITY_DN13326_c0_g1_i6	1	4	1.292e-57	0.350719	Upregulated	SA-p vs SA
TRINITY_DN16793_c0_g1_i3	5	5	2.37671e-15	0.175359	Upregulated	SA-p vs SA
TRINITY_DN26630_c0_g1_i1	3	6	4.56508e-147	0.263039	Upregulated	SA-p vs SA
TRINITY_DN16109_c0_g1_i1	2	1	3.81711e-256	0.0876797	Upregulated	SA-p vs SA
TRINITY_DN37830_c0_g1_i1	5	6	1.5909e-105	0.198422	Upregulated	SA-p vs SA
TRINITY_DN33154_c0_g1_i1	1	2	8.07399e-60	0.263039	Upregulated	SA-p vs SA
TRINITY_DN21098_c0_g2_i2	4	2	0	0.0876797	Upregulated	SA-p vs SA
TRINITY_DN50556_c0_g1_i1	1	1	2.38934e-255	0.175359	Upregulated	SA-p vs SA
TRINITY_DN15015_c0_g2_i6	0.66	2.92	1.37087e-193	0.36347	Upregulated	SA-p vs SA
TRINITY_DN5_c0_g1_i67	1	17.7	1.28958e-20	0.538851	Upregulated	SA-p vs SA
TRINITY_DN37752_c0_g1_i1	10	5	1.74992e-77	0.0876797	Upregulated	SA-p vs SA
TRINITY_DN15947_c2_g1_i3	2	1	8.26353e-256	0.0876797	Upregulated	SA-p vs SA
TRINITY_DN4110_c0_g1_i1	6	1	4.84041e-73	-0.0512894	Downregulated	SA-p vs SA
TRINITY_DN39671_c0_g1_i1	2	1	1.50904e-44	0.0876797	Upregulated	SA-p vs SA
TRINITY_DN10566_c1_g2_i2	2	0.5	3.29962e-96	9.48712e-08	Upregulated	SA-p vs SA
TRINITY_DN46961_c0_g1_i1	8	12	1.41073e-141	0.226649	Upregulated	SA-p vs SA
TRINITY_DN14063_c0_g1_i1	1	1	1.80535e-293	0.175359	Upregulated	SA-p vs SA
TRINITY_DN41690_c0_g1_i1	5	3	2.36839e-147	0.110742	Upregulated	SA-p vs SA
TRINITY_DN21970_c0_g1_i1	1	1	1.22316e-12	0.175359	Upregulated	SA-p vs SA
TRINITY_DN13636_c0_g1_i1	2	3	4.86986e-41	0.226649	Upregulated	SA-p vs SA
TRINITY_DN1523_c0_g2_i2	5	1	1.25659e-17	-0.0282266	Downregulated	SA-p vs SA
TRINITY_DN5648_c0_g1_i2	2	1.39	0.30627	0.129335	Nonsignificant	SA-p vs SA
TRINITY_DN13326_c1_g1_i1	1	1	7.79703e-109	0.175359	Upregulated	SA-p vs SA
TRINITY_DN44606_c0_g1_i1	4	2	6.37307e-52	0.0876797	Upregulated	SA-p vs SA
TRINITY_DN29396_c0_g1_i1	1	1	4.83923e-60	0.175359	Upregulated	SA-p vs SA
TRINITY_DN15015_c0_g1_i4	1.33	3.13	4.03793e-43	0.283621	Upregulated	SA-p vs SA
TRINITY_DN16125_c0_g1_i1	1	1	1.28568e-250	0.175359	Upregulated	SA-p vs SA
TRINITY_DN13880_c0_g1_i1	1	2	1.23762e-229	0.263039	Upregulated	SA-p vs SA
TRINITY_DN9189_c0_g1_i1	1	2	2.6804e-199	0.263039	Upregulated	SA-p vs SA
TRINITY_DN13701_c0_g1_i1	1	2	4.93126e-277	0.263039	Upregulated	SA-p vs SA
TRINITY_DN7260_c1_g1_i1	8	15.03	2.53311e-59	0.255128	Upregulated	SA-p vs SA
TRINITY_DN29322_c0_g1_i1	3	4	1.13744e-54	0.21175	Upregulated	SA-p vs SA
TRINITY_DN9830_c0_g1_i6	1.49	4.63	1	0.318777	Nonsignificant	SA-p vs SA
TRINITY_DN44757_c0_g1_i1	3	2	1.01148e-15	0.12407	Upregulated	SA-p vs SA
TRINITY_DN15319_c0_g1_i1	1	2	2.3088e-12	0.263039	Upregulated	SA-p vs SA
TRINITY_DN36455_c0_g1_i1	3	3	6.11315e-26	0.175359	Upregulated	SA-p vs SA
TRINITY_DN614_c0_g2_i1	7	1	0.0153481	-0.0707887	Downregulated	SA-p vs SA
TRINITY_DN121_c1_g1_i2	6.37	3.39	1.76502e-288	0.0955702	Upregulated	SA-p vs SA
TRINITY_DN19645_c3_g1_i4	6	9	2.88173e-39	0.226649	Upregulated	SA-p vs SA
TRINITY_DN13430_c3_g1_i1	1	1	2.22248e-33	0.175359	Upregulated	SA-p vs SA
TRINITY_DN34984_c0_g1_i1	1	1	1.08822e-11	0.175359	Upregulated	SA-p vs SA
TRINITY_DN27348_c0_g1_i1	5	1	6.53681e-15	-0.0282266	Downregulated	SA-p vs SA
TRINITY_DN15015_c0_g2_i2	1	1	1.59697e-51	0.175359	Upregulated	SA-p vs SA
TRINITY_DN10071_c0_g1_i2	8	11	1.82307e-133	0.215642	Upregulated	SA-p vs SA
TRINITY_DN41190_c0_g1_i1	2	6	0.00607118	0.314329	Upregulated	SA-p vs SA
TRINITY_DN15490_c0_g1_i1	3	3	2.51553e-28	0.175359	Upregulated	SA-p vs SA
TRINITY_DN48158_c0_g1_i1	1	1	3.23544e-12	0.175359	Upregulated	SA-p vs SA
TRINITY_DN11104_c0_g1_i1	1	2	0.000197693	0.263039	Upregulated	SA-p vs SA
TRINITY_DN51273_c0_g1_i1	3	3	5.09565e-40	0.175359	Upregulated	SA-p vs SA
TRINITY_DN25927_c0_g1_i4	7	10	7.77611e-21	0.220477	Upregulated	SA-p vs SA
TRINITY_DN328_c0_g5_i1	1	3	5.5946e-163	0.314328	Upregulated	SA-p vs SA
TRINITY_DN27399_c0_g1_i1	2	1	2.86057e-20	0.0876797	Upregulated	SA-p vs SA
TRINITY_DN3089_c0_g1_i2	8	7	4.55963e-205	0.158468	Upregulated	SA-p vs SA
TRINITY_DN40901_c0_g1_i1	9	12	0.282135	0.21175	Nonsignificant	SA-p vs SA
TRINITY_DN11169_c0_g1_i3	6	7.45	1.13402e-51	0.20274	Upregulated	SA-p vs SA
TRINITY_DN10027_c0_g1_i1	3	3	0.0173117	0.175359	Upregulated	SA-p vs SA
TRINITY_DN6627_c0_g1_i1	1	1	1.13712e-28	0.175359	Upregulated	SA-p vs SA
TRINITY_DN15015_c0_g1_i2	6.67	5.87	5.2704e-30	0.159198	Upregulated	SA-p vs SA
TRINITY_DN20584_c0_g1_i1	2	3	5.59918e-45	0.226649	Upregulated	SA-p vs SA
TRINITY_DN8471_c0_g1_i2	5.47	2	6.03101e-11	0.0480887	Upregulated	SA-p vs SA
TRINITY_DN41611_c0_g1_i1	2	9	3.25942e-11	0.365618	Upregulated	SA-p vs SA
TRINITY_DN24190_c0_g1_i1	7	8	4.22639e-06	0.192251	Upregulated	SA-p vs SA
TRINITY_DN195_c1_g1_i1	1	1	1.13999e-99	0.175359	Upregulated	SA-p vs SA
TRINITY_DN19645_c0_g1_i11	3	6	0.048953	0.263039	Upregulated	SA-p vs SA
TRINITY_DN15017_c0_g2_i1	3	1	2.18881e-31	0.0363904	Upregulated	SA-p vs SA
TRINITY_DN30886_c0_g1_i1	1	2	1.28577e-230	0.263039	Upregulated	SA-p vs SA
TRINITY_DN32696_c0_g1_i1	1	1	1.61285e-175	0.175359	Upregulated	SA-p vs SA
TRINITY_DN23855_c0_g2_i1	2	3	1.03011e-293	0.226649	Upregulated	SA-p vs SA
TRINITY_DN624_c0_g3_i1	4	3	4.8108e-10	0.138969	Upregulated	SA-p vs SA
TRINITY_DN42114_c0_g1_i1	8	5	2.59759e-15	0.115906	Upregulated	SA-p vs SA
TRINITY_DN25587_c1_g1_i1	1	1	4.16162e-70	0.175359	Upregulated	SA-p vs SA
TRINITY_DN50269_c0_g1_i1	1	2	0.0586286	0.263039	Nonsignificant	SA-p vs SA
TRINITY_DN23359_c0_g1_i2	1	1	1.11531e-28	0.175359	Upregulated	SA-p vs SA
TRINITY_DN14994_c0_g1_i1	3	1	0.00015565	0.0363904	Upregulated	SA-p vs SA
TRINITY_DN18306_c0_g1_i1	2	1	2.35517e-34	0.0876797	Upregulated	SA-p vs SA
TRINITY_DN27336_c0_g1_i1	3	1	3.88432e-250	0.0363904	Upregulated	SA-p vs SA
TRINITY_DN9724_c0_g1_i2	1	1	1.88773e-200	0.175359	Upregulated	SA-p vs SA
TRINITY_DN48237_c0_g1_i1	8	7	1.44558e-149	0.158468	Upregulated	SA-p vs SA
TRINITY_DN15766_c0_g1_i1	2	1	1.22522e-165	0.0876797	Upregulated	SA-p vs SA
TRINITY_DN28677_c0_g1_i1	3	3	0.00057344	0.175359	Upregulated	SA-p vs SA
TRINITY_DN1796_c0_g2_i1	3	4	3.15946e-216	0.21175	Upregulated	SA-p vs SA
TRINITY_DN33428_c0_g1_i1	2	1	1.09715e-150	0.0876797	Upregulated	SA-p vs SA
TRINITY_DN30230_c0_g1_i1	9	5	5.85497e-31	0.101007	Upregulated	SA-p vs SA
TRINITY_DN1523_c0_g1_i1	3	5	5.73585e-24	0.239976	Upregulated	SA-p vs SA
TRINITY_DN1853_c0_g1_i1	4	10	2.75918e-56	0.291266	Upregulated	SA-p vs SA
TRINITY_DN37318_c0_g1_i1	2	3	3.03407e-11	0.226649	Upregulated	SA-p vs SA
TRINITY_DN5688_c0_g1_i5	3	1	3.52253e-30	0.0363904	Upregulated	SA-p vs SA
TRINITY_DN49568_c0_g1_i1	1	1	7.25403e-285	0.175359	Upregulated	SA-p vs SA
TRINITY_DN13819_c0_g1_i1	2	2	2.08488e-20	0.175359	Upregulated	SA-p vs SA
TRINITY_DN3109_c0_g1_i1	9	1	1.26833e-12	-0.102579	Downregulated	SA-p vs SA
TRINITY_DN23090_c0_g1_i1	2	1	0.401742	0.0876797	Nonsignificant	SA-p vs SA
TRINITY_DN11294_c0_g1_i1	6	1	2.40717e-66	-0.0512894	Downregulated	SA-p vs SA
TRINITY_DN9879_c0_g1_i1	10	8	3.0106e-18	0.147133	Upregulated	SA-p vs SA
TRINITY_DN5_c0_g1_i28	2.42	10.41	3.51694e-145	0.359916	Upregulated	SA-p vs SA
TRINITY_DN39372_c0_g1_i1	1	1	6.18382e-80	0.175359	Upregulated	SA-p vs SA
TRINITY_DN22111_c0_g1_i3	3	2	4.33762e-31	0.12407	Upregulated	SA-p vs SA
TRINITY_DN38770_c0_g1_i1	2	3	6.84518e-295	0.226649	Upregulated	SA-p vs SA
TRINITY_DN36109_c0_g1_i1	2	3	2.66509e-170	0.226649	Upregulated	SA-p vs SA
TRINITY_DN45770_c0_g1_i1	1	2	1.34241e-77	0.263039	Upregulated	SA-p vs SA
TRINITY_DN41639_c0_g1_i1	1	3	9.1596e-06	0.314328	Upregulated	SA-p vs SA
TRINITY_DN33056_c0_g1_i1	6	3	1.79596e-53	0.0876797	Upregulated	SA-p vs SA
TRINITY_DN11647_c0_g1_i1	3	12	9.55611e-17	0.350719	Upregulated	SA-p vs SA
TRINITY_DN23921_c0_g1_i1	1	1	1.307e-20	0.175359	Upregulated	SA-p vs SA
TRINITY_DN128_c4_g1_i1	9	1	2.18566e-29	-0.102579	Downregulated	SA-p vs SA
TRINITY_DN31184_c0_g1_i1	4	5	4.3079e-30	0.203586	Upregulated	SA-p vs SA
TRINITY_DN52099_c0_g1_i1	3	2	1.49383e-23	0.12407	Upregulated	SA-p vs SA
TRINITY_DN21599_c0_g1_i1	4	4	3.49284e-52	0.175359	Upregulated	SA-p vs SA
TRINITY_DN46840_c0_g1_i1	3	9	0.023845	0.314329	Upregulated	SA-p vs SA
TRINITY_DN4252_c0_g1_i1	6	5	3.61715e-96	0.152297	Upregulated	SA-p vs SA
TRINITY_DN46177_c0_g1_i1	1	1	0.13207	0.175359	Nonsignificant	SA-p vs SA
TRINITY_DN29666_c0_g1_i1	1	1	0.11103	0.175359	Nonsignificant	SA-p vs SA
TRINITY_DN704_c0_g1_i1	1	4	7.57792e-07	0.350719	Upregulated	SA-p vs SA
TRINITY_DN43527_c0_g1_i1	1	5	1.1088e-121	0.378945	Upregulated	SA-p vs SA
TRINITY_DN17247_c0_g1_i1	1	1	2.79569e-27	0.175359	Upregulated	SA-p vs SA
TRINITY_DN54303_c0_g1_i1	2	1	2.91983e-154	0.0876797	Upregulated	SA-p vs SA
TRINITY_DN54307_c0_g1_i1	1	1	4.90961e-285	0.175359	Upregulated	SA-p vs SA
TRINITY_DN38264_c0_g1_i1	1	1	2.20194e-20	0.175359	Upregulated	SA-p vs SA
TRINITY_DN17820_c0_g1_i1	1	1	7.75692e-29	0.175359	Upregulated	SA-p vs SA
TRINITY_DN48213_c0_g1_i1	2	3	8.99544e-51	0.226649	Upregulated	SA-p vs SA
TRINITY_DN52494_c0_g1_i1	2	7	5.17609e-24	0.333828	Upregulated	SA-p vs SA
TRINITY_DN1523_c0_g2_i6	4	10	1.43022e-09	0.291266	Upregulated	SA-p vs SA
TRINITY_DN5285_c0_g2_i2	4	3	2.41275e-108	0.138969	Upregulated	SA-p vs SA
TRINITY_DN27497_c0_g1_i1	1	4	1.6256e-59	0.350719	Upregulated	SA-p vs SA
TRINITY_DN27552_c0_g1_i1	5	4	0.00265305	0.147133	Upregulated	SA-p vs SA
TRINITY_DN46005_c0_g1_i1	3	1	7.66447e-28	0.0363904	Upregulated	SA-p vs SA
TRINITY_DN49163_c0_g1_i1	1	5	0.0139512	0.378945	Upregulated	SA-p vs SA
TRINITY_DN51944_c0_g1_i1	2	1	1.59503e-15	0.0876797	Upregulated	SA-p vs SA
TRINITY_DN17303_c0_g2_i1	4	3	0.0143062	0.138969	Upregulated	SA-p vs SA
TRINITY_DN21681_c0_g1_i1	1	1	1.59477e-19	0.175359	Upregulated	SA-p vs SA
TRINITY_DN25240_c0_g1_i1	7	9	1.28088e-33	0.207149	Upregulated	SA-p vs SA
TRINITY_DN5153_c0_g3_i1	4	3	4.52569e-245	0.138969	Upregulated	SA-p vs SA
TRINITY_DN17534_c0_g1_i1	6	8	1.76102e-290	0.21175	Upregulated	SA-p vs SA
TRINITY_DN46729_c0_g1_i1	1	8	8.15841e-172	0.438399	Upregulated	SA-p vs SA
TRINITY_DN38734_c0_g1_i1	4	1	1.22926e-233	0	Nonsignificant	SA-p vs SA
TRINITY_DN22966_c0_g1_i1	1	1	1.65801e-203	0.175359	Upregulated	SA-p vs SA
TRINITY_DN40866_c0_g1_i1	2	6	2.27836e-237	0.314329	Upregulated	SA-p vs SA
TRINITY_DN8528_c0_g2_i1	4	2	0.381255	0.0876797	Nonsignificant	SA-p vs SA
TRINITY_DN50879_c0_g1_i1	1	1	1.42164e-10	0.175359	Upregulated	SA-p vs SA
TRINITY_DN40107_c0_g1_i1	2	1	9.1417e-110	0.0876797	Upregulated	SA-p vs SA
TRINITY_DN20377_c0_g1_i1	1.63	2	1.04252e-245	0.201236	Upregulated	SA-p vs SA
TRINITY_DN37522_c0_g1_i1	1	1	8.89425e-242	0.175359	Upregulated	SA-p vs SA
TRINITY_DN12180_c0_g1_i1	3	2	2.44005e-193	0.12407	Upregulated	SA-p vs SA
TRINITY_DN26950_c0_g1_i1	4	1	9.21685e-83	0	Nonsignificant	SA-p vs SA
TRINITY_DN36769_c0_g1_i1	6	3	4.54702e-62	0.0876797	Upregulated	SA-p vs SA
TRINITY_DN5208_c0_g1_i1	1	2	0	0.263039	Upregulated	SA-p vs SA
TRINITY_DN22556_c0_g1_i1	1	1	5.45221e-16	0.175359	Upregulated	SA-p vs SA
TRINITY_DN38420_c0_g1_i1	1	2	5.36129e-30	0.263039	Upregulated	SA-p vs SA
TRINITY_DN14618_c0_g1_i1	4	2.88	9.07606e-20	0.133805	Upregulated	SA-p vs SA
TRINITY_DN47829_c0_g1_i1	1	1	5.37528e-85	0.175359	Upregulated	SA-p vs SA
TRINITY_DN15788_c0_g1_i1	1	1	7.66526e-16	0.175359	Upregulated	SA-p vs SA
TRINITY_DN5285_c0_g1_i1	1	2	1.17118e-12	0.263039	Upregulated	SA-p vs SA
TRINITY_DN47112_c0_g1_i1	5	10	6.09387e-07	0.263039	Upregulated	SA-p vs SA
TRINITY_DN41056_c0_g1_i1	1	1	6.85812e-25	0.175359	Upregulated	SA-p vs SA
TRINITY_DN51605_c0_g1_i1	3	2	9.28004e-20	0.12407	Upregulated	SA-p vs SA
TRINITY_DN10816_c0_g2_i1	4	2	0.00125538	0.0876797	Upregulated	SA-p vs SA
TRINITY_DN49022_c0_g1_i1	2	2	1.52717e-98	0.175359	Upregulated	SA-p vs SA
TRINITY_DN46546_c0_g1_i1	4	9	3.38042e-232	0.277938	Upregulated	SA-p vs SA
TRINITY_DN11817_c0_g1_i1	1	8	5.52441e-37	0.438399	Upregulated	SA-p vs SA
TRINITY_DN10279_c0_g1_i1	4	1	2.46681e-77	0	Nonsignificant	SA-p vs SA
TRINITY_DN13866_c0_g1_i1	5	8.33	6.71058e-27	0.239926	Upregulated	SA-p vs SA
TRINITY_DN33136_c0_g1_i1	1	2	2.51695e-06	0.263039	Upregulated	SA-p vs SA
TRINITY_DN43462_c0_g1_i1	1	1	7.96223e-88	0.175359	Upregulated	SA-p vs SA
TRINITY_DN36192_c0_g1_i1	2	2	0.000421961	0.175359	Upregulated	SA-p vs SA
TRINITY_DN46292_c0_g1_i1	10	21	2.8254e-09	0.269211	Upregulated	SA-p vs SA
TRINITY_DN19918_c0_g3_i1	1	1	4.00215e-138	0.175359	Upregulated	SA-p vs SA
TRINITY_DN16944_c0_g1_i1	1	1	6.40284e-69	0.175359	Upregulated	SA-p vs SA
TRINITY_DN20332_c0_g2_i1	9	16	2.47647e-25	0.24814	Upregulated	SA-p vs SA
TRINITY_DN12088_c0_g1_i1	3	1	1.64928e-223	0.0363904	Upregulated	SA-p vs SA
TRINITY_DN17303_c0_g1_i1	1	3	3.16028e-26	0.314328	Upregulated	SA-p vs SA
TRINITY_DN14555_c0_g2_i1	5	9	1.36262e-15	0.249712	Upregulated	SA-p vs SA
TRINITY_DN32671_c0_g1_i1	5	4	2.06165e-79	0.147133	Upregulated	SA-p vs SA
TRINITY_DN19081_c0_g1_i1	3	4	0.00931543	0.21175	Upregulated	SA-p vs SA
TRINITY_DN7271_c0_g1_i1	7	2	1.62714e-39	0.016891	Upregulated	SA-p vs SA
TRINITY_DN34296_c0_g1_i1	1	1	6.10839e-29	0.175359	Upregulated	SA-p vs SA
TRINITY_DN36084_c0_g1_i1	8	19	1.32759e-108	0.284777	Upregulated	SA-p vs SA
TRINITY_DN25847_c0_g1_i1	6	10	9.1596e-06	0.239976	Upregulated	SA-p vs SA
TRINITY_DN13763_c0_g1_i2	2	1	1.79596e-53	0.0876797	Upregulated	SA-p vs SA
TRINITY_DN43419_c0_g1_i1	1	2	9.55611e-17	0.263039	Upregulated	SA-p vs SA
TRINITY_DN37606_c0_g1_i1	9	7	1.307e-20	0.143569	Upregulated	SA-p vs SA
TRINITY_DN14635_c0_g1_i1	1	2	2.18566e-29	0.263039	Upregulated	SA-p vs SA
TRINITY_DN19943_c0_g1_i1	3	2	4.3079e-30	0.12407	Upregulated	SA-p vs SA
TRINITY_DN19262_c0_g1_i1	2	1	1.32812e-12	0.0876797	Upregulated	SA-p vs SA
TRINITY_DN43316_c0_g1_i1	2	2	1.88831e-142	0.175359	Upregulated	SA-p vs SA
TRINITY_DN40095_c0_g1_i1	1	3	2.10115e-74	0.314328	Upregulated	SA-p vs SA
TRINITY_DN19360_c0_g1_i1	2	1	4.33104e-18	0.0876797	Upregulated	SA-p vs SA
TRINITY_DN29577_c0_g1_i1	3	1	2.34453e-13	0.0363904	Upregulated	SA-p vs SA
TRINITY_DN5285_c0_g1_i5	1	8	3.89639e-50	0.438399	Upregulated	SA-p vs SA
TRINITY_DN33867_c0_g1_i1	2	2	9.02819e-29	0.175359	Upregulated	SA-p vs SA
TRINITY_DN50689_c0_g1_i1	1	3	2.81292e-24	0.314328	Upregulated	SA-p vs SA
TRINITY_DN19645_c0_g1_i7	4.38	4	0.517394	0.163879	Nonsignificant	SA-p vs SA
TRINITY_DN43971_c0_g1_i1	3	6	8.36967e-21	0.263039	Upregulated	SA-p vs SA
TRINITY_DN46425_c0_g1_i1	1	1	3.09211e-16	0.175359	Upregulated	SA-p vs SA
TRINITY_DN1523_c0_g1_i4	4	2	1.24369e-05	0.0876797	Upregulated	SA-p vs SA
TRINITY_DN15342_c0_g1_i1	1	1	1.27256e-09	0.175359	Upregulated	SA-p vs SA
TRINITY_DN52335_c0_g1_i1	3	4	4.61023e-44	0.21175	Upregulated	SA-p vs SA
TRINITY_DN599_c0_g1_i2	5.46	12.8	3.02077e-206	0.283133	Upregulated	SA-p vs SA
TRINITY_DN20532_c0_g1_i1	1	2	6.5362e-285	0.263039	Upregulated	SA-p vs SA
TRINITY_DN36319_c0_g1_i1	4	3	6.20657e-75	0.138969	Upregulated	SA-p vs SA
TRINITY_DN54219_c0_g1_i1	1	1	1.09609e-49	0.175359	Upregulated	SA-p vs SA
TRINITY_DN3420_c0_g3_i1	4	3	1.53567e-238	0.138969	Upregulated	SA-p vs SA
TRINITY_DN3421_c0_g2_i5	0.18	2.05	1.88102e-18	0.483076	Upregulated	SA-p vs SA
TRINITY_DN8978_c0_g2_i1	1	3	1.30016e-26	0.314328	Upregulated	SA-p vs SA
TRINITY_DN32448_c0_g1_i1	1	1	1.3518e-25	0.175359	Upregulated	SA-p vs SA
TRINITY_DN31169_c0_g1_i1	1	2	4.66898e-61	0.263039	Upregulated	SA-p vs SA
TRINITY_DN8863_c0_g2_i1	1	1	2.54877e-05	0.175359	Upregulated	SA-p vs SA
TRINITY_DN10071_c0_g2_i1	2	2	1.08823e-236	0.175359	Upregulated	SA-p vs SA
TRINITY_DN23080_c0_g1_i1	1	3	0.41243	0.314328	Nonsignificant	SA-p vs SA
TRINITY_DN27741_c0_g1_i1	4	1	1.98441e-74	0	Nonsignificant	SA-p vs SA
TRINITY_DN18182_c1_g1_i2	1	1	3.31685e-65	0.175359	Upregulated	SA-p vs SA
TRINITY_DN14616_c0_g1_i1	2	3	1.44864e-101	0.226649	Upregulated	SA-p vs SA
TRINITY_DN24030_c0_g1_i1	1	1	1.15542e-82	0.175359	Upregulated	SA-p vs SA
TRINITY_DN19645_c0_g1_i13	2	2	2.26239e-135	0.175359	Upregulated	SA-p vs SA
TRINITY_DN39758_c0_g1_i1	2	3	1.63112e-39	0.226649	Upregulated	SA-p vs SA
TRINITY_DN26821_c0_g1_i1	1	4	1.97236e-69	0.350719	Upregulated	SA-p vs SA
TRINITY_DN14712_c0_g1_i2	1	2	5.25459e-56	0.263039	Upregulated	SA-p vs SA
TRINITY_DN2257_c0_g1_i4	1	2	3.8279e-57	0.263039	Upregulated	SA-p vs SA
TRINITY_DN46356_c0_g1_i1	1	4	8.90397e-15	0.350719	Upregulated	SA-p vs SA
TRINITY_DN32573_c0_g1_i1	2	1	1.83446e-103	0.0876797	Upregulated	SA-p vs SA
TRINITY_DN46443_c0_g1_i1	1	1	0.000857787	0.175359	Upregulated	SA-p vs SA
TRINITY_DN16202_c0_g1_i1	2	1	1.42632e-18	0.0876797	Upregulated	SA-p vs SA
TRINITY_DN17123_c0_g1_i1	1	1	4.17025e-05	0.175359	Upregulated	SA-p vs SA
TRINITY_DN41384_c0_g1_i1	5	1	0.12358	-0.0282266	Nonsignificant	SA-p vs SA
TRINITY_DN39322_c0_g1_i1	4	1	1.65417e-07	0	Nonsignificant	SA-p vs SA
TRINITY_DN47940_c0_g1_i1	1	1	2.53241e-21	0.175359	Upregulated	SA-p vs SA
TRINITY_DN41114_c0_g1_i1	4	2	9.38761e-145	0.0876797	Upregulated	SA-p vs SA
TRINITY_DN5793_c0_g2_i1	7	1	0.000672116	-0.0707887	Downregulated	SA-p vs SA
TRINITY_DN37374_c0_g1_i1	1	1	1.83661e-147	0.175359	Upregulated	SA-p vs SA
TRINITY_DN46328_c0_g1_i1	1	2	4.40118e-63	0.263039	Upregulated	SA-p vs SA
TRINITY_DN37995_c0_g1_i1	2	2	7.79147e-78	0.175359	Upregulated	SA-p vs SA
TRINITY_DN41047_c0_g1_i1	1	1	6.03372e-40	0.175359	Upregulated	SA-p vs SA
TRINITY_DN52509_c0_g1_i1	2	1	9.54689e-38	0.0876797	Upregulated	SA-p vs SA
TRINITY_DN29110_c0_g1_i1	1	2	2.87803e-74	0.263039	Upregulated	SA-p vs SA
TRINITY_DN18213_c0_g1_i1	1	4	8.29238e-202	0.350719	Upregulated	SA-p vs SA
TRINITY_DN43175_c0_g1_i1	4	5	1.13524e-149	0.203586	Upregulated	SA-p vs SA
TRINITY_DN42916_c0_g1_i1	2	2	1.17412e-153	0.175359	Upregulated	SA-p vs SA
TRINITY_DN22636_c0_g1_i1	4	3	1.75375e-24	0.138969	Upregulated	SA-p vs SA
TRINITY_DN13932_c0_g1_i1	1	1	4.83093e-144	0.175359	Upregulated	SA-p vs SA
TRINITY_DN47267_c0_g1_i1	2	1	1.61713e-15	0.0876797	Upregulated	SA-p vs SA
TRINITY_DN1523_c0_g1_i2	7	10.47	4.67721e-14	0.226287	Upregulated	SA-p vs SA
TRINITY_DN22323_c0_g2_i1	1	1	1.35626e-21	0.175359	Upregulated	SA-p vs SA
TRINITY_DN45577_c0_g1_i1	1	1	1.0689e-59	0.175359	Upregulated	SA-p vs SA
TRINITY_DN24346_c0_g1_i1	2	1	7.1922e-36	0.0876797	Upregulated	SA-p vs SA
TRINITY_DN16_c0_g1_i2	10	1	4.1542e-16	-0.115906	Downregulated	SA-p vs SA
TRINITY_DN1846_c0_g2_i1	1	1	2.28608e-66	0.175359	Upregulated	SA-p vs SA
TRINITY_DN37395_c0_g1_i1	2	1	7.32052e-147	0.0876797	Upregulated	SA-p vs SA
TRINITY_DN7230_c0_g1_i7	10.44	9.01	1.33121e-06	0.156726	Upregulated	SA-p vs SA
TRINITY_DN47736_c0_g1_i1	1	5	9.9007e-15	0.378945	Upregulated	SA-p vs SA
TRINITY_DN14732_c0_g1_i1	2	1	0.0120982	0.0876797	Upregulated	SA-p vs SA
TRINITY_DN10401_c0_g1_i1	1	2	6.09387e-07	0.263039	Upregulated	SA-p vs SA
TRINITY_DN41013_c0_g1_i1	1	2	1.40211e-12	0.263039	Upregulated	SA-p vs SA
TRINITY_DN50372_c0_g1_i1	3	7	2.08962e-88	0.282538	Upregulated	SA-p vs SA
TRINITY_DN43257_c0_g1_i1	3	2	5.99426e-64	0.12407	Upregulated	SA-p vs SA
TRINITY_DN15605_c0_g2_i1	7	17	3.70978e-162	0.287599	Upregulated	SA-p vs SA
TRINITY_DN46018_c0_g1_i1	5	3	1.19683e-12	0.110742	Upregulated	SA-p vs SA
TRINITY_DN51189_c0_g1_i1	5	3	4.03391e-09	0.110742	Upregulated	SA-p vs SA
TRINITY_DN39248_c0_g1_i1	2	1	1.30339e-230	0.0876797	Upregulated	SA-p vs SA
TRINITY_DN30432_c0_g1_i1	8	1	0.41243	-0.0876798	Nonsignificant	SA-p vs SA
TRINITY_DN52336_c0_g1_i1	3	1	1.2521e-144	0.0363904	Upregulated	SA-p vs SA
TRINITY_DN41291_c0_g1_i1	6	7	1.37065e-09	0.194859	Upregulated	SA-p vs SA
TRINITY_DN46726_c0_g1_i1	6	10	7.45732e-05	0.239976	Upregulated	SA-p vs SA
TRINITY_DN49434_c0_g1_i1	1	1	3.42679e-240	0.175359	Upregulated	SA-p vs SA
TRINITY_DN9096_c0_g1_i1	8	4	4.28377e-42	0.0876797	Upregulated	SA-p vs SA
TRINITY_DN34868_c0_g1_i1	2	1	1.00607e-46	0.0876797	Upregulated	SA-p vs SA
TRINITY_DN36416_c0_g1_i1	1	3	9.56644e-77	0.314328	Upregulated	SA-p vs SA
TRINITY_DN278_c0_g1_i3	0.08	1	6.61205e-48	0.49485	Upregulated	SA-p vs SA
TRINITY_DN46874_c0_g1_i1	1	1	1.02771e-53	0.175359	Upregulated	SA-p vs SA
TRINITY_DN20210_c0_g1_i1	1	1	3.38308e-69	0.175359	Upregulated	SA-p vs SA
TRINITY_DN15814_c0_g1_i1	4	1	7.74103e-79	0	Nonsignificant	SA-p vs SA
TRINITY_DN8978_c0_g1_i1	2	6	1.98565e-113	0.314329	Upregulated	SA-p vs SA
TRINITY_DN3225_c1_g1_i1	4	2	1	0.0876797	Nonsignificant	SA-p vs SA
TRINITY_DN37635_c0_g1_i1	7	6	3.68117e-30	0.15586	Upregulated	SA-p vs SA
TRINITY_DN47220_c0_g1_i1	3	1	0.000857787	0.0363904	Upregulated	SA-p vs SA
TRINITY_DN9830_c0_g1_i5	1	2	3.11547e-171	0.263039	Upregulated	SA-p vs SA
TRINITY_DN49066_c0_g1_i1	2	5	6.03101e-11	0.291266	Upregulated	SA-p vs SA
TRINITY_DN19936_c1_g1_i1	1	2	6.28123e-23	0.263039	Upregulated	SA-p vs SA
TRINITY_DN44147_c0_g1_i1	1	1	3.00787e-92	0.175359	Upregulated	SA-p vs SA
TRINITY_DN12872_c0_g1_i1	3	5	4.26991e-61	0.239976	Upregulated	SA-p vs SA
TRINITY_DN19146_c0_g1_i1	3	2	0.00237953	0.12407	Upregulated	SA-p vs SA
TRINITY_DN7016_c2_g1_i1	1	2	8.28855e-24	0.263039	Upregulated	SA-p vs SA
TRINITY_DN15123_c0_g1_i1	4	11	5.82322e-22	0.303322	Upregulated	SA-p vs SA
TRINITY_DN28204_c0_g1_i1	2	3	3.59921e-15	0.226649	Upregulated	SA-p vs SA
TRINITY_DN36541_c0_g1_i1	3	5	1.71694e-167	0.239976	Upregulated	SA-p vs SA
TRINITY_DN52081_c0_g1_i1	2	1	4.11516e-192	0.0876797	Upregulated	SA-p vs SA
TRINITY_DN47587_c0_g1_i1	1	1	1.11582e-159	0.175359	Upregulated	SA-p vs SA
TRINITY_DN46014_c0_g1_i1	1	5	2.13619e-138	0.378945	Upregulated	SA-p vs SA
TRINITY_DN15015_c1_g1_i1	2	2	2.5571e-54	0.175359	Upregulated	SA-p vs SA
TRINITY_DN42751_c0_g1_i1	5	8	3.36091e-08	0.234813	Upregulated	SA-p vs SA
TRINITY_DN10535_c0_g1_i1	2	1	2.35357e-34	0.0876797	Upregulated	SA-p vs SA
TRINITY_DN9830_c0_g2_i1	0.04	2.23	4.91055e-159	0.683978	Upregulated	SA-p vs SA
TRINITY_DN28252_c0_g1_i1	4	2	9.80101e-33	0.0876797	Upregulated	SA-p vs SA
TRINITY_DN188_c0_g4_i1	4	4	1.79395e-204	0.175359	Upregulated	SA-p vs SA
TRINITY_DN1389_c0_g1_i2	5.6	11.31	1.52711e-259	0.264275	Upregulated	SA-p vs SA
TRINITY_DN11776_c0_g1_i1	2	2	7.46027e-149	0.175359	Upregulated	SA-p vs SA
TRINITY_DN28656_c0_g1_i1	1	1	6.63552e-102	0.175359	Upregulated	SA-p vs SA
TRINITY_DN251_c0_g1_i1	2	4	2.97202e-211	0.263039	Upregulated	SA-p vs SA
TRINITY_DN27845_c0_g1_i1	2	2	3.15627e-201	0.175359	Upregulated	SA-p vs SA
TRINITY_DN1389_c0_g1_i3	4.02	16.97	8.16516e-214	0.357533	Upregulated	SA-p vs SA
TRINITY_DN18066_c0_g1_i1	2	1	0.401742	0.0876797	Nonsignificant	SA-p vs SA
TRINITY_DN28838_c0_g1_i1	1	2	0.355755	0.263039	Nonsignificant	SA-p vs SA
TRINITY_DN16853_c0_g2_i1	1	1	1.64126e-201	0.175359	Upregulated	SA-p vs SA
TRINITY_DN17163_c0_g2_i1	2	2	0.0101133	0.175359	Upregulated	SA-p vs SA
TRINITY_DN52510_c0_g1_i1	1	1	8.26382e-55	0.175359	Upregulated	SA-p vs SA
TRINITY_DN41137_c0_g1_i1	1	1	6.71019e-167	0.175359	Upregulated	SA-p vs SA
TRINITY_DN9830_c2_g1_i1	1	5	1.40713e-87	0.378945	Upregulated	SA-p vs SA
TRINITY_DN13790_c0_g1_i1	1	1	5.90087e-210	0.175359	Upregulated	SA-p vs SA
TRINITY_DN12683_c0_g2_i1	1	1	1.08049e-306	0.175359	Upregulated	SA-p vs SA
TRINITY_DN46173_c0_g1_i1	2	4	8.73108e-147	0.263039	Upregulated	SA-p vs SA
TRINITY_DN49688_c0_g1_i1	3	3	2.13019e-192	0.175359	Upregulated	SA-p vs SA
TRINITY_DN6358_c0_g1_i2	1	3	6.49656e-272	0.314328	Upregulated	SA-p vs SA
TRINITY_DN12537_c0_g1_i1	1	1	1.84611e-137	0.175359	Upregulated	SA-p vs SA
TRINITY_DN19132_c0_g1_i1	3	2	1.58078e-224	0.12407	Upregulated	SA-p vs SA
TRINITY_DN22260_c0_g1_i1	1	1	6.85812e-25	0.175359	Upregulated	SA-p vs SA
TRINITY_DN7393_c0_g1_i1	2	1	1.14762e-05	0.0876797	Upregulated	SA-p vs SA
TRINITY_DN20286_c1_g1_i1	2	5	0.0140563	0.291266	Upregulated	SA-p vs SA
TRINITY_DN23986_c0_g1_i2	7	6	3.82233e-48	0.15586	Upregulated	SA-p vs SA
TRINITY_DN32577_c0_g1_i1	1	2	3.93272e-121	0.263039	Upregulated	SA-p vs SA
TRINITY_DN25116_c0_g1_i1	1	2	6.52397e-76	0.263039	Upregulated	SA-p vs SA
TRINITY_DN48002_c0_g1_i1	3	2	4.53083e-274	0.12407	Upregulated	SA-p vs SA
TRINITY_DN33217_c0_g1_i1	8	6	9.34448e-284	0.138969	Upregulated	SA-p vs SA
TRINITY_DN37014_c0_g1_i1	2	3	9.14307e-81	0.226649	Upregulated	SA-p vs SA
TRINITY_DN11832_c0_g2_i4	2.6	0.28	3.50831e-161	-0.106532	Downregulated	SA-p vs SA
TRINITY_DN3957_c0_g1_i1	2	3	3.89268e-167	0.226649	Upregulated	SA-p vs SA
TRINITY_DN20160_c0_g1_i1	2	2	7.99642e-87	0.175359	Upregulated	SA-p vs SA
TRINITY_DN17374_c0_g1_i1	3	6	3.43414e-146	0.263039	Upregulated	SA-p vs SA
TRINITY_DN39635_c0_g1_i1	1	1	1.53866e-33	0.175359	Upregulated	SA-p vs SA
TRINITY_DN11236_c0_g1_i2	1	1	1.46287e-229	0.175359	Upregulated	SA-p vs SA
TRINITY_DN30339_c0_g1_i1	7	1	4.13029e-232	-0.0707887	Downregulated	SA-p vs SA
TRINITY_DN13287_c0_g1_i1	4	4	5.22555e-247	0.175359	Upregulated	SA-p vs SA
TRINITY_DN35885_c0_g1_i1	1	7	9.72268e-255	0.421508	Upregulated	SA-p vs SA
TRINITY_DN20402_c0_g1_i1	7	14	3.62217e-07	0.263039	Upregulated	SA-p vs SA
TRINITY_DN84_c0_g1_i2	8	1	4.49302e-87	-0.0876798	Downregulated	SA-p vs SA
TRINITY_DN34166_c0_g1_i1	3	4	2.21409e-117	0.21175	Upregulated	SA-p vs SA
TRINITY_DN40455_c0_g1_i1	1	1	1.56687e-159	0.175359	Upregulated	SA-p vs SA
TRINITY_DN37338_c0_g1_i1	4	3	1.71789e-98	0.138969	Upregulated	SA-p vs SA
TRINITY_DN38752_c0_g1_i1	1	2	1.99474e-102	0.263039	Upregulated	SA-p vs SA
TRINITY_DN13713_c0_g1_i1	1	2	0	0.263039	Upregulated	SA-p vs SA
TRINITY_DN16677_c0_g1_i1	3	1	2.07461e-32	0.0363904	Upregulated	SA-p vs SA
TRINITY_DN32188_c0_g1_i1	4	2	7.67625e-54	0.0876797	Upregulated	SA-p vs SA
TRINITY_DN10816_c0_g1_i1	3	2	6.53681e-15	0.12407	Upregulated	SA-p vs SA
TRINITY_DN49312_c0_g1_i1	1	1	1.97348e-144	0.175359	Upregulated	SA-p vs SA
TRINITY_DN14618_c1_g1_i2	0.5	3	5.69742e-285	0.402008	Upregulated	SA-p vs SA
TRINITY_DN51850_c0_g1_i1	2	2	2.38767e-30	0.175359	Upregulated	SA-p vs SA
TRINITY_DN6142_c0_g1_i4	1	2	8.52426e-245	0.263039	Upregulated	SA-p vs SA
TRINITY_DN22481_c0_g1_i1	2	1	4.33104e-18	0.0876797	Upregulated	SA-p vs SA
TRINITY_DN27020_c0_g1_i1	2	2	1.45292e-29	0.175359	Upregulated	SA-p vs SA
TRINITY_DN51067_c0_g1_i1	2	1	9.17211e-40	0.0876797	Upregulated	SA-p vs SA
TRINITY_DN5648_c0_g2_i2	3	2	7.09719e-128	0.12407	Upregulated	SA-p vs SA
TRINITY_DN36931_c0_g1_i1	4	7	1.3518e-25	0.246148	Upregulated	SA-p vs SA
TRINITY_DN8224_c0_g2_i7	1	7	2.42172e-114	0.421508	Upregulated	SA-p vs SA
TRINITY_DN13855_c0_g1_i1	2	3	2.32161e-85	0.226649	Upregulated	SA-p vs SA
TRINITY_DN8571_c0_g1_i1	1	4	6.81463e-10	0.350719	Upregulated	SA-p vs SA
TRINITY_DN5543_c0_g2_i1	3	1	0.311691	0.0363904	Nonsignificant	SA-p vs SA
TRINITY_DN22600_c1_g1_i1	1	1	1.27259e-41	0.175359	Upregulated	SA-p vs SA
TRINITY_DN33838_c0_g1_i1	2	1	8.6498e-155	0.0876797	Upregulated	SA-p vs SA
TRINITY_DN15015_c0_g2_i7	1.68	6.08	2.89372e-20	0.338059	Upregulated	SA-p vs SA
TRINITY_DN36657_c0_g1_i1	1	1	5.82316e-303	0.175359	Upregulated	SA-p vs SA
TRINITY_DN19720_c0_g1_i1	2	1	3.00325e-10	0.0876797	Upregulated	SA-p vs SA
TRINITY_DN3871_c0_g2_i3	7.97	3.15	1.50908e-244	0.0579363	Upregulated	SA-p vs SA
TRINITY_DN12322_c0_g1_i1	2	3	1.59617e-58	0.226649	Upregulated	SA-p vs SA
TRINITY_DN212_c1_g1_i16	3	2	9.6986e-59	0.12407	Upregulated	SA-p vs SA
TRINITY_DN46741_c0_g1_i1	3	1	2.9012e-43	0.0363904	Upregulated	SA-p vs SA
TRINITY_DN36023_c0_g1_i1	2	1	7.54421e-263	0.0876797	Upregulated	SA-p vs SA
TRINITY_DN53795_c0_g1_i1	1	2	6.45476e-45	0.263039	Upregulated	SA-p vs SA
TRINITY_DN19762_c0_g1_i1	1	2	6.24947e-114	0.263039	Upregulated	SA-p vs SA
TRINITY_DN7127_c0_g1_i1	9	9	3.42444e-69	0.175359	Upregulated	SA-p vs SA
TRINITY_DN30920_c0_g1_i1	2	5	6.91597e-74	0.291266	Upregulated	SA-p vs SA
TRINITY_DN42246_c0_g1_i1	7	5	3.82351e-08	0.132797	Upregulated	SA-p vs SA
TRINITY_DN44954_c0_g1_i1	2	1	3.86175e-25	0.0876797	Upregulated	SA-p vs SA
TRINITY_DN13326_c2_g1_i7	1	1.19	3.6859e-169	0.197364	Upregulated	SA-p vs SA
TRINITY_DN18831_c0_g2_i1	1	1	2.07368e-38	0.175359	Upregulated	SA-p vs SA
TRINITY_DN40416_c0_g1_i1	1	1	1.33121e-06	0.175359	Upregulated	SA-p vs SA
TRINITY_DN28401_c0_g1_i1	1	1	3.61578e-69	0.175359	Upregulated	SA-p vs SA
TRINITY_DN8978_c0_g3_i1	1	9	4.54645e-26	0.453298	Upregulated	SA-p vs SA
TRINITY_DN18787_c0_g1_i1	1	3	7.39724e-25	0.314328	Upregulated	SA-p vs SA
TRINITY_DN53404_c0_g1_i1	1	1	2.40176e-10	0.175359	Upregulated	SA-p vs SA
TRINITY_DN25379_c0_g1_i1	2	4	2.03601e-91	0.263039	Upregulated	SA-p vs SA
TRINITY_DN50649_c0_g1_i1	1	1	4.01296e-110	0.175359	Upregulated	SA-p vs SA
TRINITY_DN36027_c0_g1_i1	1	2	8.36744e-81	0.263039	Upregulated	SA-p vs SA
TRINITY_DN31943_c0_g1_i1	8	18	4.32752e-27	0.277938	Upregulated	SA-p vs SA
TRINITY_DN37946_c0_g1_i1	7	9	1.49614e-55	0.207149	Upregulated	SA-p vs SA
TRINITY_DN47760_c0_g1_i1	1	1	3.14499e-253	0.175359	Upregulated	SA-p vs SA
TRINITY_DN3882_c1_g1_i2	5.05	1	6.84518e-295	-0.0294852	Downregulated	SA-p vs SA
TRINITY_DN14388_c0_g1_i1	7	10	2.66509e-170	0.220477	Upregulated	SA-p vs SA
TRINITY_DN24382_c0_g2_i1	1	14	1.34241e-77	0.509187	Upregulated	SA-p vs SA
TRINITY_DN49165_c0_g1_i1	1	1	9.1596e-06	0.175359	Upregulated	SA-p vs SA
TRINITY_DN14212_c0_g1_i1	7	5	1.79596e-53	0.132797	Upregulated	SA-p vs SA
TRINITY_DN36562_c0_g1_i1	2	1	9.55611e-17	0.0876797	Upregulated	SA-p vs SA
TRINITY_DN30503_c0_g1_i1	1	1	1.307e-20	0.175359	Upregulated	SA-p vs SA
TRINITY_DN51652_c0_g1_i1	7	11	2.18566e-29	0.232533	Upregulated	SA-p vs SA
TRINITY_DN50547_c0_g1_i1	1	3	4.3079e-30	0.314328	Upregulated	SA-p vs SA
TRINITY_DN32664_c0_g1_i1	2	3	1.32812e-12	0.226649	Upregulated	SA-p vs SA
TRINITY_DN53815_c0_g1_i1	1	2	1.88831e-142	0.263039	Upregulated	SA-p vs SA
TRINITY_DN7113_c0_g2_i1	2	4	2.10115e-74	0.263039	Upregulated	SA-p vs SA
TRINITY_DN9867_c1_g1_i1	2	2	4.33104e-18	0.175359	Upregulated	SA-p vs SA
TRINITY_DN19937_c0_g1_i1	2	1	2.34453e-13	0.0876797	Upregulated	SA-p vs SA
TRINITY_DN25466_c0_g2_i1	1	5	3.89639e-50	0.378945	Upregulated	SA-p vs SA
TRINITY_DN4252_c0_g2_i1	1	4	9.02819e-29	0.350719	Upregulated	SA-p vs SA
TRINITY_DN50165_c0_g1_i1	1	1	2.81292e-24	0.175359	Upregulated	SA-p vs SA
TRINITY_DN15697_c0_g2_i1	4	7	0.517394	0.246148	Nonsignificant	SA-p vs SA
TRINITY_DN15652_c0_g1_i1	3	2	8.36967e-21	0.12407	Upregulated	SA-p vs SA
TRINITY_DN9830_c0_g1_i4	1.51	2.37	3.09211e-16	0.232381	Upregulated	SA-p vs SA
TRINITY_DN39425_c0_g1_i1	1	2	1.24369e-05	0.263039	Upregulated	SA-p vs SA
TRINITY_DN31101_c0_g1_i1	2	1	1.27256e-09	0.0876797	Upregulated	SA-p vs SA
TRINITY_DN6142_c1_g1_i2	6	5	4.61023e-44	0.152297	Upregulated	SA-p vs SA
TRINITY_DN6334_c0_g2_i2	1	1.99	3.02077e-206	0.262405	Upregulated	SA-p vs SA
TRINITY_DN16171_c0_g2_i1	1	1	6.5362e-285	0.175359	Upregulated	SA-p vs SA
TRINITY_DN39157_c0_g1_i1	1	1	6.20657e-75	0.175359	Upregulated	SA-p vs SA
TRINITY_DN23095_c1_g1_i1	1	1	1.09609e-49	0.175359	Upregulated	SA-p vs SA
TRINITY_DN33165_c0_g1_i2	3	1	1.53567e-238	0.0363904	Upregulated	SA-p vs SA
TRINITY_DN9830_c0_g2_i3	2.96	11.79	1.88102e-18	0.350184	Upregulated	SA-p vs SA
TRINITY_DN23173_c0_g1_i1	2	1	1.30016e-26	0.0876797	Upregulated	SA-p vs SA
TRINITY_DN23888_c0_g1_i1	2	2	1.3518e-25	0.175359	Upregulated	SA-p vs SA
TRINITY_DN34538_c0_g1_i1	9	6	4.66898e-61	0.12407	Upregulated	SA-p vs SA
TRINITY_DN9914_c0_g2_i1	7	14	2.54877e-05	0.263039	Upregulated	SA-p vs SA
TRINITY_DN45681_c0_g1_i1	8	10	1.08823e-236	0.203586	Upregulated	SA-p vs SA
TRINITY_DN38777_c0_g1_i1	3	3	5.00038e-23	0.175359	Upregulated	SA-p vs SA
TRINITY_DN52278_c0_g1_i1	1	1	1.93229e-94	0.175359	Upregulated	SA-p vs SA
TRINITY_DN38513_c0_g1_i1	1	2	2.72967e-182	0.263039	Upregulated	SA-p vs SA
TRINITY_DN2348_c0_g1_i6	7	1	1.51456e-58	-0.0707887	Downregulated	SA-p vs SA
TRINITY_DN28065_c0_g1_i1	1	2	2.70782e-184	0.263039	Upregulated	SA-p vs SA
TRINITY_DN3420_c0_g2_i1	5	7	1.64659e-216	0.217922	Upregulated	SA-p vs SA
TRINITY_DN7834_c0_g1_i1	3	3	1.52741e-15	0.175359	Upregulated	SA-p vs SA
TRINITY_DN24103_c0_g1_i3	2	1	0.0884894	0.0876797	Nonsignificant	SA-p vs SA
TRINITY_DN41698_c0_g1_i1	1	1	0.11103	0.175359	Nonsignificant	SA-p vs SA
TRINITY_DN37154_c0_g1_i1	1	1	0.355755	0.175359	Nonsignificant	SA-p vs SA
TRINITY_DN38539_c0_g1_i1	4	6	8.15513e-134	0.226649	Upregulated	SA-p vs SA
TRINITY_DN32554_c0_g1_i1	1	1	1.3488e-153	0.175359	Upregulated	SA-p vs SA
TRINITY_DN32689_c0_g1_i1	5	14	4.49065e-13	0.305601	Upregulated	SA-p vs SA
TRINITY_DN36540_c0_g1_i1	1	1	0.1128	0.175359	Nonsignificant	SA-p vs SA
TRINITY_DN349_c0_g1_i2	6	3	0.106845	0.0876797	Nonsignificant	SA-p vs SA
TRINITY_DN15690_c0_g1_i1	1	2	0.00660661	0.263039	Upregulated	SA-p vs SA
TRINITY_DN3420_c0_g1_i1	1	1	2.56927e-118	0.175359	Upregulated	SA-p vs SA
TRINITY_DN19723_c0_g1_i4	1	2	1.11799e-14	0.263039	Upregulated	SA-p vs SA
TRINITY_DN42291_c0_g1_i1	4	3	1.17672e-28	0.138969	Upregulated	SA-p vs SA
TRINITY_DN18371_c0_g2_i1	2	1	0.000296643	0.0876797	Upregulated	SA-p vs SA
TRINITY_DN290_c0_g2_i1	3	1	0.299181	0.0363904	Nonsignificant	SA-p vs SA
TRINITY_DN52504_c0_g1_i1	3	1	0.00841274	0.0363904	Upregulated	SA-p vs SA
TRINITY_DN16508_c0_g1_i1	9	8	7.45732e-05	0.16046	Upregulated	SA-p vs SA

## Sheet: P-value-sig
gene_id	SA	SA-P	Pvalue	logFC	category	condition
TRINITY_DN0_c0_g1_i10	84657.4	373.38	1.2848e-103	-0.510721	Downregulated	SA-p vs SA
TRINITY_DN0_c0_g1_i12	3476.54	1.08	2.01909e-79	-0.846321	Downregulated	SA-p vs SA
TRINITY_DN0_c0_g1_i14	175.69	44525.7	1.32796e-238	0.875523	Upregulated	SA-p vs SA
TRINITY_DN0_c0_g1_i15	9324.92	1.35	1.02142e-116	-0.942901	Downregulated	SA-p vs SA
TRINITY_DN0_c0_g1_i20	25.01	925.27	7.52195e-118	0.632109	Upregulated	SA-p vs SA
TRINITY_DN0_c0_g1_i21	1806.12	1	1.292e-57	-0.77322	Downregulated	SA-p vs SA
TRINITY_DN0_c0_g1_i22	389.68	279.65	2.37671e-15	0.13339	Upregulated	SA-p vs SA
TRINITY_DN0_c0_g1_i26	20406.7	1.61	4.56508e-147	-1.01969	Downregulated	SA-p vs SA
TRINITY_DN0_c0_g1_i27	13.81	23119.3	3.81711e-256	1.11434	Upregulated	SA-p vs SA
TRINITY_DN0_c0_g1_i4	7591.89	2.75	1.5909e-105	-0.826891	Downregulated	SA-p vs SA
TRINITY_DN1_c0_g1_i7	1925.52	1	8.07399e-60	-0.781317	Downregulated	SA-p vs SA
TRINITY_DN1_c13_g1_i1	27	170616	0	1.28236	Upregulated	SA-p vs SA
TRINITY_DN10_c0_g1_i18	125.62	51741	2.38934e-255	0.936955	Upregulated	SA-p vs SA
TRINITY_DN10_c0_g1_i28	63066.7	2.86	1.37087e-193	-1.08973	Downregulated	SA-p vs SA
TRINITY_DN10_c0_g1_i8	541.37	6.47	1.28958e-20	-0.384625	Downregulated	SA-p vs SA
TRINITY_DN10_c0_g2_i1	4415	9	1.74992e-77	-0.608346	Downregulated	SA-p vs SA
TRINITY_DN10_c3_g1_i6	2	22943.1	8.26353e-256	1.35779	Upregulated	SA-p vs SA
TRINITY_DN1000_c0_g1_i1	3161	3	4.84041e-73	-0.705051	Downregulated	SA-p vs SA
TRINITY_DN1000_c0_g5_i1	1292	3	1.50904e-44	-0.591876	Downregulated	SA-p vs SA
TRINITY_DN1001_c0_g1_i1	6420.16	5	3.29962e-96	-0.730063	Downregulated	SA-p vs SA
TRINITY_DN1003_c0_g1_i1	19580	5	1.41073e-141	-0.871113	Downregulated	SA-p vs SA
TRINITY_DN1004_c0_g3_i1	21	54644	1.80535e-293	1.17013	Upregulated	SA-p vs SA
TRINITY_DN1004_c1_g1_i1	14	1860	2.36839e-147	0.793829	Upregulated	SA-p vs SA
TRINITY_DN1008_c0_g1_i1	346.16	7	1.22316e-12	-0.318097	Downregulated	SA-p vs SA
TRINITY_DN1008_c2_g1_i1	1014	1	4.86986e-41	-0.700197	Downregulated	SA-p vs SA
TRINITY_DN1010_c0_g1_i2	315.56	1.15	1.25659e-17	-0.534859	Downregulated	SA-p vs SA
TRINITY_DN1012_c0_g1_i7	9327.74	7	7.79703e-109	-0.734753	Downregulated	SA-p vs SA
TRINITY_DN10131_c0_g3_i1	2042	8	6.37307e-52	-0.525708	Downregulated	SA-p vs SA
TRINITY_DN1015_c0_g2_i1	2168	3	4.83923e-60	-0.657352	Downregulated	SA-p vs SA
TRINITY_DN10197_c0_g1_i2	1003.77	0.21	4.03793e-43	-0.896328	Downregulated	SA-p vs SA
TRINITY_DN102_c0_g1_i2	59	29178	1.28568e-250	0.960089	Upregulated	SA-p vs SA
TRINITY_DN102_c0_g4_i1	1	12545	1.23762e-229	1.3691	Upregulated	SA-p vs SA
TRINITY_DN102_c1_g2_i1	37	6775	2.6804e-199	0.834409	Upregulated	SA-p vs SA
TRINITY_DN102_c1_g3_i1	3	37420	4.93126e-277	1.36838	Upregulated	SA-p vs SA
TRINITY_DN10211_c0_g3_i1	2027.67	1.98	2.53311e-59	-0.701448	Downregulated	SA-p vs SA
TRINITY_DN10211_c0_g3_i2	1509.33	0.02	1.13744e-54	-1.24536	Downregulated	SA-p vs SA
TRINITY_DN1029_c0_g1_i1	282	1	1.01148e-15	-0.538314	Downregulated	SA-p vs SA
TRINITY_DN10312_c0_g1_i1	213	1	2.3088e-12	-0.502818	Downregulated	SA-p vs SA
TRINITY_DN10323_c0_g1_i3	810.75	8.51	6.11315e-26	-0.401043	Downregulated	SA-p vs SA
TRINITY_DN10323_c0_g1_i4	39.2	1.49	0.0153481	-0.238267	Downregulated	SA-p vs SA
TRINITY_DN1033_c0_g2_i2	4	48712	1.76502e-288	1.36535	Upregulated	SA-p vs SA
TRINITY_DN10341_c0_g1_i1	937	1	2.88173e-39	-0.690207	Downregulated	SA-p vs SA
TRINITY_DN10364_c0_g1_i1	741	1	2.22248e-33	-0.660521	Downregulated	SA-p vs SA
TRINITY_DN10364_c0_g2_i1	196	1	1.08822e-11	-0.492296	Downregulated	SA-p vs SA
TRINITY_DN10364_c0_g4_i1	261	1	6.53681e-15	-0.528525	Downregulated	SA-p vs SA
TRINITY_DN104_c0_g1_i1	1738	4	1.59697e-51	-0.592997	Downregulated	SA-p vs SA
TRINITY_DN1044_c0_g1_i5	159511	342	1.82307e-133	-0.601961	Downregulated	SA-p vs SA
TRINITY_DN1047_c0_g2_i2	3439.72	5	3.98869e-73	-0.651123	Downregulated	SA-p vs SA
TRINITY_DN105_c0_g1_i4	1137	27733.2	4.25321e-150	0.579415	Upregulated	SA-p vs SA
TRINITY_DN105_c0_g1_i6	35062.8	2.95	2.065e-168	-1.01156	Downregulated	SA-p vs SA
TRINITY_DN105_c0_g1_i7	9982.75	1	1.61661e-119	-0.989486	Downregulated	SA-p vs SA
TRINITY_DN105_c0_g1_i8	18051.9	0.13	8.04702e-145	-1.3225	Downregulated	SA-p vs SA
TRINITY_DN105_c9_g1_i1	18	12387	4.26083e-229	1.00188	Upregulated	SA-p vs SA
TRINITY_DN10531_c0_g3_i1	22750	5	6.54254e-148	-0.890094	Downregulated	SA-p vs SA
TRINITY_DN1058_c0_g1_i1	1	4245	9.0704e-183	1.23204	Upregulated	SA-p vs SA
TRINITY_DN106_c0_g1_i5	14	219.81	2.00222e-60	0.52369	Upregulated	SA-p vs SA
TRINITY_DN106_c0_g1_i8	10	1147.59	7.90099e-127	0.775305	Upregulated	SA-p vs SA
TRINITY_DN106_c0_g2_i1	29	33438.1	3.70177e-272	1.06717	Upregulated	SA-p vs SA
TRINITY_DN106_c0_g2_i3	7	7009.89	1.92087e-204	1.04934	Upregulated	SA-p vs SA
TRINITY_DN1061_c0_g1_i3	3092.85	6	3.09786e-68	-0.614614	Downregulated	SA-p vs SA
TRINITY_DN1061_c0_g3_i1	264	1	3.53068e-15	-0.529971	Downregulated	SA-p vs SA
TRINITY_DN10628_c0_g1_i1	265.83	1.54	9.64561e-14	-0.476227	Downregulated	SA-p vs SA
TRINITY_DN10628_c0_g1_i3	561.17	1.46	1.80927e-27	-0.577488	Downregulated	SA-p vs SA
TRINITY_DN10628_c1_g1_i1	3098	2	2.10728e-73	-0.753794	Downregulated	SA-p vs SA
TRINITY_DN10647_c0_g1_i1	587	1	1.37839e-28	-0.63105	Downregulated	SA-p vs SA
TRINITY_DN1067_c0_g1_i3	116.88	1	5.27277e-07	-0.426903	Downregulated	SA-p vs SA
TRINITY_DN1069_c0_g1_i1	298.15	1	1.28036e-16	-0.545359	Downregulated	SA-p vs SA
TRINITY_DN107_c0_g3_i1	6	1508	2.26128e-138	0.87447	Upregulated	SA-p vs SA
TRINITY_DN10775_c0_g1_i1	5	1959.61	1.47773e-149	0.93067	Upregulated	SA-p vs SA
TRINITY_DN10869_c0_g1_i1	1	228	2.61096e-61	0.862145	Upregulated	SA-p vs SA
TRINITY_DN1088_c1_g1_i1	3117	29	1.55139e-49	-0.4163	Downregulated	SA-p vs SA
TRINITY_DN1088_c1_g3_i1	263	1	4.80239e-15	-0.529491	Downregulated	SA-p vs SA
TRINITY_DN1090_c0_g1_i1	15732.9	17.53	2.76113e-119	-0.684757	Downregulated	SA-p vs SA
TRINITY_DN1090_c0_g1_i3	11003.1	24.47	5.8978e-100	-0.597334	Downregulated	SA-p vs SA
TRINITY_DN10914_c0_g4_i1	17	13288	3.88026e-232	1.01799	Upregulated	SA-p vs SA
TRINITY_DN1093_c0_g3_i1	3371.71	3	6.40613e-75	-0.713214	Downregulated	SA-p vs SA
TRINITY_DN10932_c2_g1_i2	10875.7	10	1.66437e-111	-0.709057	Downregulated	SA-p vs SA
TRINITY_DN11_c0_g1_i19	74.86	1.03	0.000184687	-0.366806	Downregulated	SA-p vs SA
TRINITY_DN11_c0_g1_i6	18.87	36.8	4.72798e-12	0.259849	Upregulated	SA-p vs SA
TRINITY_DN110_c0_g1_i2	793.93	13	1.5842e-22	-0.344794	Downregulated	SA-p vs SA
TRINITY_DN11120_c2_g1_i1	1	1204	9.08219e-129	1.07264	Upregulated	SA-p vs SA
TRINITY_DN11123_c0_g1_i1	368	2	1.78709e-18	-0.484305	Downregulated	SA-p vs SA
TRINITY_DN11143_c0_g1_i1	14	211	6.56758e-59	0.518516	Upregulated	SA-p vs SA
TRINITY_DN1115_c0_g1_i1	570	2	2.97854e-26	-0.539653	Downregulated	SA-p vs SA
TRINITY_DN1115_c0_g1_i2	1062	2	1.0174e-40	-0.618368	Downregulated	SA-p vs SA
TRINITY_DN112_c0_g1_i3	374.62	1.21	2.42329e-20	-0.550127	Downregulated	SA-p vs SA
TRINITY_DN112_c0_g1_i7	156.29	1.79	3.7307e-08	-0.39001	Downregulated	SA-p vs SA
TRINITY_DN113_c0_g2_i2	88	58225.5	7.93288e-271	0.996913	Upregulated	SA-p vs SA
TRINITY_DN113_c0_g3_i5	5602.99	14.63	1.16188e-80	-0.577031	Downregulated	SA-p vs SA
TRINITY_DN113_c0_g3_i6	181.25	3.37	1.40778e-08	-0.328719	Downregulated	SA-p vs SA
TRINITY_DN113_c0_g3_i7	551	1	4.32752e-27	-0.623044	Downregulated	SA-p vs SA
TRINITY_DN1137_c0_g1_i1	961.4	2.74	2.70334e-36	-0.565957	Downregulated	SA-p vs SA
TRINITY_DN1137_c0_g1_i2	1828.76	1.77	2.47994e-56	-0.702569	Downregulated	SA-p vs SA
TRINITY_DN1137_c0_g1_i3	44.83	0.48	0.000143701	-0.398529	Downregulated	SA-p vs SA
TRINITY_DN1139_c1_g1_i1	319	2	2.90749e-16	-0.46623	Downregulated	SA-p vs SA
TRINITY_DN11398_c0_g1_i2	4170.19	2	4.56088e-84	-0.791389	Downregulated	SA-p vs SA
TRINITY_DN11398_c0_g5_i1	74	1	7.45732e-05	-0.369084	Downregulated	SA-p vs SA
TRINITY_DN114_c0_g1_i16	44.54	0.47	0.000143701	-0.400372	Downregulated	SA-p vs SA
TRINITY_DN114_c0_g1_i5	7274.94	3.53	9.64599e-103	-0.789912	Downregulated	SA-p vs SA
TRINITY_DN11408_c1_g1_i1	51	548	2.61331e-85	0.475716	Upregulated	SA-p vs SA
TRINITY_DN1145_c0_g2_i3	2701	13	2.17774e-56	-0.499673	Downregulated	SA-p vs SA
TRINITY_DN1145_c1_g1_i1	221	1	6.22166e-13	-0.507482	Downregulated	SA-p vs SA
TRINITY_DN1146_c0_g1_i4	588.41	3	1.64643e-25	-0.492385	Downregulated	SA-p vs SA
TRINITY_DN1147_c0_g1_i1	1764	3	1.68093e-53	-0.631266	Downregulated	SA-p vs SA
TRINITY_DN1147_c0_g1_i4	629	1	9.67339e-30	-0.639792	Downregulated	SA-p vs SA
TRINITY_DN115_c0_g2_i3	1	329.93	1.91319e-75	0.90889	Upregulated	SA-p vs SA
TRINITY_DN11549_c0_g2_i1	690.5	4	1.54025e-27	-0.476233	Downregulated	SA-p vs SA
TRINITY_DN1155_c1_g1_i1	151	1	4.03391e-09	-0.459302	Downregulated	SA-p vs SA
TRINITY_DN11567_c0_g2_i1	1	3772	1.12887e-177	1.21709	Upregulated	SA-p vs SA
TRINITY_DN11580_c0_g1_i1	16	1940	3.65694e-149	0.782265	Upregulated	SA-p vs SA
TRINITY_DN116_c0_g1_i11	3.85	62649.6	2.10834e-299	1.40201	Upregulated	SA-p vs SA
TRINITY_DN116_c0_g1_i13	4.15	54658.4	1.76959e-293	1.37526	Upregulated	SA-p vs SA
TRINITY_DN116_c0_g1_i5	44982.9	14	1.91908e-167	-0.846087	Downregulated	SA-p vs SA
TRINITY_DN11600_c0_g1_i1	11	1403	2.51658e-135	0.788668	Upregulated	SA-p vs SA
TRINITY_DN11637_c0_g2_i1	13	369	4.36954e-80	0.598593	Upregulated	SA-p vs SA
TRINITY_DN11652_c1_g1_i1	1544.47	4	3.82233e-48	-0.578064	Downregulated	SA-p vs SA
TRINITY_DN11655_c1_g4_i1	11856	5	3.93272e-121	-0.807654	Downregulated	SA-p vs SA
TRINITY_DN11656_c0_g1_i1	3314	2	6.52397e-76	-0.762319	Downregulated	SA-p vs SA
TRINITY_DN11667_c0_g3_i1	3.05	34950.1	4.53083e-274	1.35765	Upregulated	SA-p vs SA
TRINITY_DN11667_c0_g3_i2	28.95	43683.9	9.34448e-284	1.1012	Upregulated	SA-p vs SA
TRINITY_DN1172_c0_g1_i2	4101.85	4	9.14307e-81	-0.701619	Downregulated	SA-p vs SA
TRINITY_DN1176_c0_g1_i1	7	2570	3.50831e-161	0.922408	Upregulated	SA-p vs SA
TRINITY_DN1177_c0_g1_i2	1	2952.59	3.89268e-167	1.18611	Upregulated	SA-p vs SA
TRINITY_DN1177_c0_g1_i6	16	436.05	7.99642e-87	0.593447	Upregulated	SA-p vs SA
TRINITY_DN1194_c2_g5_i1	1	1812.03	3.43414e-146	1.12435	Upregulated	SA-p vs SA
TRINITY_DN1198_c0_g1_i1	745	1	1.53866e-33	-0.661202	Downregulated	SA-p vs SA
TRINITY_DN11980_c0_g1_i1	1	12524	1.46287e-229	1.36889	Upregulated	SA-p vs SA
TRINITY_DN12_c0_g2_i1	14	13280	4.13029e-232	1.04248	Upregulated	SA-p vs SA
TRINITY_DN12_c0_g5_i1	18	18726	5.22555e-247	1.05416	Upregulated	SA-p vs SA
TRINITY_DN12_c4_g1_i1	51	29197	9.72268e-255	0.978603	Upregulated	SA-p vs SA
TRINITY_DN120_c0_g1_i1	120	1	3.62217e-07	-0.430235	Downregulated	SA-p vs SA
TRINITY_DN120_c0_g2_i1	10853	44	4.49302e-87	-0.521377	Downregulated	SA-p vs SA
TRINITY_DN120_c1_g1_i2	9885	2	2.21409e-117	-0.900561	Downregulated	SA-p vs SA
TRINITY_DN12015_c0_g1_i1	42281.3	20	1.56687e-159	-0.793134	Downregulated	SA-p vs SA
TRINITY_DN121_c0_g1_i2	5856.67	1	1.71789e-98	-0.922029	Downregulated	SA-p vs SA
TRINITY_DN121_c0_g1_i7	10432	18	1.99474e-102	-0.629436	Downregulated	SA-p vs SA
TRINITY_DN121_c1_g1_i3	844.63	7.85155e+06	0	1.33119	Upregulated	SA-p vs SA
TRINITY_DN1211_c0_g1_i1	714	1	2.07461e-32	-0.655825	Downregulated	SA-p vs SA
TRINITY_DN1213_c2_g1_i1	1	186	7.67625e-54	0.836391	Upregulated	SA-p vs SA
TRINITY_DN1217_c0_g1_i1	261	1	6.53681e-15	-0.528525	Downregulated	SA-p vs SA
TRINITY_DN122_c1_g1_i2	1	1739	1.97348e-144	1.11915	Upregulated	SA-p vs SA
TRINITY_DN12202_c0_g1_i1	5	44929	5.69742e-285	1.3269	Upregulated	SA-p vs SA
TRINITY_DN12206_c0_g1_i2	5	84.2	2.38767e-30	0.532551	Upregulated	SA-p vs SA
TRINITY_DN123_c0_g1_i1	1	17798	8.52426e-245	1.41335	Upregulated	SA-p vs SA
TRINITY_DN1230_c0_g1_i1	332	1	4.33104e-18	-0.558962	Downregulated	SA-p vs SA
TRINITY_DN124_c0_g1_i18	50.96	71097.4	2.35794e-293	1.09128	Upregulated	SA-p vs SA
TRINITY_DN124_c0_g1_i2	2.71	31342.9	2.41293e-269	1.35882	Upregulated	SA-p vs SA
TRINITY_DN124_c0_g1_i28	13.35	59347.7	4.71218e-297	1.23787	Upregulated	SA-p vs SA
TRINITY_DN124_c0_g1_i5	61.98	36515	2.08679e-259	0.98223	Upregulated	SA-p vs SA
TRINITY_DN124_c1_g1_i1	3	67426	1.36524e-302	1.44286	Upregulated	SA-p vs SA
TRINITY_DN12401_c0_g3_i1	44	15111	9.57153e-230	0.913963	Upregulated	SA-p vs SA
TRINITY_DN1244_c0_g2_i1	32	19013	1.13114e-247	0.983302	Upregulated	SA-p vs SA
TRINITY_DN1244_c1_g1_i1	1	9720	1.39372e-218	1.33683	Upregulated	SA-p vs SA
TRINITY_DN12454_c0_g1_i1	222	1	6.22166e-13	-0.508053	Downregulated	SA-p vs SA
TRINITY_DN1246_c0_g3_i1	137.17	1	1.81193e-08	-0.447151	Downregulated	SA-p vs SA
TRINITY_DN12487_c0_g1_i1	18444	9	9.47628e-135	-0.7892	Downregulated	SA-p vs SA
TRINITY_DN125_c0_g1_i12	23233.4	115	1.65984e-91	-0.496129	Downregulated	SA-p vs SA
TRINITY_DN1255_c0_g1_i1	101.92	0.35	2.63022e-08	-0.542375	Downregulated	SA-p vs SA
TRINITY_DN1255_c0_g1_i3	1170.84	2.65	1.56225e-41	-0.595112	Downregulated	SA-p vs SA
TRINITY_DN126_c1_g1_i1	175	2	2.56281e-09	-0.390281	Downregulated	SA-p vs SA
TRINITY_DN12600_c0_g6_i1	29	38427	3.42508e-278	1.08476	Upregulated	SA-p vs SA
TRINITY_DN12603_c0_g1_i2	320.57	3.93	7.24484e-14	-0.381404	Downregulated	SA-p vs SA
TRINITY_DN12603_c0_g1_i4	4709.43	2.09	9.28355e-89	-0.801203	Downregulated	SA-p vs SA
TRINITY_DN12603_c1_g2_i1	349	1	6.24221e-19	-0.565279	Downregulated	SA-p vs SA
TRINITY_DN1261_c0_g1_i1	5	5835	1.65244e-196	1.06869	Upregulated	SA-p vs SA
TRINITY_DN1262_c0_g1_i1	11	48739	1.66649e-288	1.23746	Upregulated	SA-p vs SA
TRINITY_DN1262_c0_g2_i1	2	34135	4.78477e-273	1.40805	Upregulated	SA-p vs SA
TRINITY_DN1262_c0_g3_i1	17	34456	1.86502e-273	1.13852	Upregulated	SA-p vs SA
TRINITY_DN1262_c0_g5_i1	47	53233	4.14831e-283	1.06491	Upregulated	SA-p vs SA
TRINITY_DN1262_c0_g6_i1	1	3967	7.54477e-180	1.22347	Upregulated	SA-p vs SA
TRINITY_DN1262_c0_g7_i1	1	6631	4.96005e-202	1.28845	Upregulated	SA-p vs SA
TRINITY_DN1262_c0_g8_i1	781	6942161	0	1.32552	Upregulated	SA-p vs SA
TRINITY_DN1262_c11_g1_i1	3	12968	4.5025e-231	1.23433	Upregulated	SA-p vs SA
TRINITY_DN1263_c0_g1_i1	1	357	1.70265e-78	0.918864	Upregulated	SA-p vs SA
TRINITY_DN1264_c0_g2_i1	2536	7	3.34918e-60	-0.570005	Downregulated	SA-p vs SA
TRINITY_DN1266_c0_g1_i2	1780	3	7.65883e-54	-0.632408	Downregulated	SA-p vs SA
TRINITY_DN1266_c0_g1_i3	383	1	2.86057e-20	-0.577038	Downregulated	SA-p vs SA
TRINITY_DN12676_c0_g1_i2	3229.67	2	5.95235e-75	-0.759059	Downregulated	SA-p vs SA
TRINITY_DN12676_c0_g2_i1	622.1	1	2.18566e-29	-0.638397	Downregulated	SA-p vs SA
TRINITY_DN12676_c1_g1_i1	729	1	6.75004e-33	-0.658455	Downregulated	SA-p vs SA
TRINITY_DN12680_c0_g3_i1	5	2977	1.71694e-167	0.983567	Upregulated	SA-p vs SA
TRINITY_DN127_c0_g3_i2	7.65	5270.27	4.11516e-192	1.00202	Upregulated	SA-p vs SA
TRINITY_DN127_c0_g3_i3	22.35	2479.43	1.11582e-159	0.77102	Upregulated	SA-p vs SA
TRINITY_DN127_c0_g6_i1	1	1510	2.13619e-138	1.10129	Upregulated	SA-p vs SA
TRINITY_DN1278_c0_g1_i1	36	208	2.5571e-54	0.397234	Upregulated	SA-p vs SA
TRINITY_DN128_c2_g1_i5	204	5	3.36091e-08	-0.293771	Downregulated	SA-p vs SA
TRINITY_DN1289_c0_g2_i1	833	2	2.35357e-34	-0.587645	Downregulated	SA-p vs SA
TRINITY_DN129_c0_g2_i1	35549.2	12	4.91055e-159	-0.835814	Downregulated	SA-p vs SA
TRINITY_DN1292_c0_g2_i1	724	1	9.80101e-33	-0.657585	Downregulated	SA-p vs SA
TRINITY_DN1296_c0_g1_i1	1	7016	1.79395e-204	1.29559	Upregulated	SA-p vs SA
TRINITY_DN13_c0_g3_i2	18	25002.3	1.52711e-259	1.09072	Upregulated	SA-p vs SA
TRINITY_DN13_c0_g4_i2	0.09	1928.68	7.46027e-149	1.43684	Upregulated	SA-p vs SA
TRINITY_DN13_c0_g4_i3	0.91	635.32	6.63552e-102	1.00371	Upregulated	SA-p vs SA
TRINITY_DN13_c0_g5_i1	7	8205	2.97202e-211	1.06925	Upregulated	SA-p vs SA
TRINITY_DN13_c0_g6_i1	5	6508	3.15627e-201	1.0825	Upregulated	SA-p vs SA
TRINITY_DN13_c1_g4_i1	18	8703	8.16516e-214	0.957233	Upregulated	SA-p vs SA
TRINITY_DN13047_c0_g1_i1	13	6548.56	1.64126e-201	0.962419	Upregulated	SA-p vs SA
TRINITY_DN13074_c0_g1_i1	40	1	0.0101133	-0.291266	Downregulated	SA-p vs SA
TRINITY_DN13078_c0_g1_i2	1834	3	8.26382e-55	-0.636188	Downregulated	SA-p vs SA
TRINITY_DN13095_c0_g1_i1	1	2937	6.71019e-167	1.18544	Upregulated	SA-p vs SA
TRINITY_DN131_c0_g2_i2	4370	1	1.40713e-87	-0.884988	Downregulated	SA-p vs SA
TRINITY_DN1310_c0_g1_i2	10	7962.39	5.90087e-210	1.02033	Upregulated	SA-p vs SA
TRINITY_DN1323_c0_g1_i1	23	74103.3	1.08049e-306	1.19715	Upregulated	SA-p vs SA
TRINITY_DN1323_c0_g3_i1	17	1835.12	8.73108e-147	0.767566	Upregulated	SA-p vs SA
TRINITY_DN1323_c4_g1_i1	16	5303	2.13019e-192	0.909466	Upregulated	SA-p vs SA
TRINITY_DN1325_c0_g2_i1	9	33254	6.49656e-272	1.21448	Upregulated	SA-p vs SA
TRINITY_DN1326_c0_g1_i2	2	1477	1.84611e-137	1.01081	Upregulated	SA-p vs SA
TRINITY_DN1326_c1_g2_i1	8	11149	1.58078e-224	1.09114	Upregulated	SA-p vs SA
TRINITY_DN1327_c0_g2_i3	488.66	1	6.85812e-25	-0.607856	Downregulated	SA-p vs SA
TRINITY_DN1328_c0_g1_i4	90	1	1.14762e-05	-0.393845	Downregulated	SA-p vs SA
TRINITY_DN133_c0_g1_i4	26	14.25	0.0140563	0.0992929	Upregulated	SA-p vs SA
TRINITY_DN133_c0_g2_i3	13	4875	9.21575e-189	0.925087	Upregulated	SA-p vs SA
TRINITY_DN1332_c0_g1_i1	4101.87	3	2.43871e-82	-0.73801	Downregulated	SA-p vs SA
TRINITY_DN1332_c0_g2_i1	490	1	6.85812e-25	-0.608203	Downregulated	SA-p vs SA
TRINITY_DN134_c0_g1_i5	1164.87	25	7.04698e-24	-0.31057	Downregulated	SA-p vs SA
TRINITY_DN1342_c0_g1_i2	767.24	1	2.98806e-34	-0.664922	Downregulated	SA-p vs SA
TRINITY_DN1342_c0_g1_i3	402.4	1	3.58416e-21	-0.583288	Downregulated	SA-p vs SA
TRINITY_DN1344_c0_g1_i1	4383.85	1.26	1.01656e-87	-0.856154	Downregulated	SA-p vs SA
TRINITY_DN1344_c0_g1_i2	112.15	0.74	6.09387e-07	-0.459765	Downregulated	SA-p vs SA
TRINITY_DN1344_c0_g2_i1	460	1	1.49383e-23	-0.600211	Downregulated	SA-p vs SA
TRINITY_DN135_c0_g1_i14	15358.1	31352.5	3.49284e-52	0.265633	Upregulated	SA-p vs SA
TRINITY_DN135_c0_g1_i3	58.05	3.48	0.023845	-0.180632	Downregulated	SA-p vs SA
TRINITY_DN135_c0_g1_i6	5522	1	3.61715e-96	-0.914585	Downregulated	SA-p vs SA
TRINITY_DN13536_c0_g2_i1	163	4	7.57792e-07	-0.293616	Downregulated	SA-p vs SA
TRINITY_DN13582_c0_g1_i1	14	1016	1.1088e-121	0.717337	Upregulated	SA-p vs SA
TRINITY_DN136_c0_g2_i1	557	1	2.79569e-27	-0.624414	Downregulated	SA-p vs SA
TRINITY_DN13613_c0_g2_i3	1	2188	2.91983e-154	1.1482	Upregulated	SA-p vs SA
TRINITY_DN13613_c1_g1_i2	5	44996	4.90961e-285	1.32708	Upregulated	SA-p vs SA
TRINITY_DN13648_c0_g1_i1	385	1	2.20194e-20	-0.577697	Downregulated	SA-p vs SA
TRINITY_DN1367_c1_g1_i8	646.9	1.58	7.75692e-29	-0.585479	Downregulated	SA-p vs SA
TRINITY_DN1373_c0_g1_i1	1444	1	8.99544e-51	-0.744915	Downregulated	SA-p vs SA
TRINITY_DN1377_c0_g1_i1	505.89	1.52	5.17609e-24	-0.559275	Downregulated	SA-p vs SA
TRINITY_DN1377_c0_g1_i4	270.13	6.51	1.43022e-09	-0.295906	Downregulated	SA-p vs SA
TRINITY_DN1377_c0_g1_i5	8466.21	3.97	2.41275e-108	-0.794235	Downregulated	SA-p vs SA
TRINITY_DN138_c0_g1_i13	2039	2	1.6256e-59	-0.700881	Downregulated	SA-p vs SA
TRINITY_DN138_c0_g1_i8	207	17	0.00265305	-0.140816	Downregulated	SA-p vs SA
TRINITY_DN1380_c0_g1_i3	1010.48	13	7.66447e-28	-0.375303	Downregulated	SA-p vs SA
TRINITY_DN13829_c1_g3_i11	20.74	0.03	0.0139512	-0.65174	Downregulated	SA-p vs SA
TRINITY_DN13829_c1_g3_i4	510.98	10.97	1.59503e-15	-0.31053	Downregulated	SA-p vs SA
TRINITY_DN1389_c0_g1_i1	16.38	10.72	0.0143062	0.121732	Upregulated	SA-p vs SA
TRINITY_DN139_c0_g1_i5	359.06	0.53	1.59477e-19	-0.649182	Downregulated	SA-p vs SA
TRINITY_DN139_c0_g1_i6	749.07	1.47	1.28088e-33	-0.613157	Downregulated	SA-p vs SA
TRINITY_DN14_c1_g1_i11	92.89	33712.2	4.52569e-245	0.920947	Upregulated	SA-p vs SA
TRINITY_DN14_c1_g1_i3	63.11	74727.8	1.76102e-290	1.07053	Upregulated	SA-p vs SA
TRINITY_DN14_c1_g1_i4	14	3290	8.15841e-172	0.865971	Upregulated	SA-p vs SA
TRINITY_DN14_c1_g1_i8	1	13759	1.22926e-233	1.38079	Upregulated	SA-p vs SA
TRINITY_DN14_c1_g3_i1	11	6859	1.65801e-203	0.989409	Upregulated	SA-p vs SA
TRINITY_DN14_c1_g5_i1	1	14996	2.27836e-237	1.39168	Upregulated	SA-p vs SA
TRINITY_DN14049_c0_g1_i1	2	25	1.42164e-10	0.494852	Upregulated	SA-p vs SA
TRINITY_DN141_c0_g3_i2	11	765.06	9.1417e-110	0.711959	Upregulated	SA-p vs SA
TRINITY_DN141_c1_g1_i1	18	18173	1.04252e-245	1.05037	Upregulated	SA-p vs SA
TRINITY_DN141_c1_g2_i1	1	16601.4	8.89425e-242	1.40454	Upregulated	SA-p vs SA
TRINITY_DN141_c1_g8_i1	21	5419	2.44005e-193	0.877805	Upregulated	SA-p vs SA
TRINITY_DN14192_c0_g1_i1	3972	2	9.21685e-83	-0.785229	Downregulated	SA-p vs SA
TRINITY_DN14192_c0_g2_i1	2299	3	4.54702e-62	-0.664773	Downregulated	SA-p vs SA
TRINITY_DN142_c0_g2_i1	26	135850	0	1.25831	Upregulated	SA-p vs SA
TRINITY_DN143_c0_g1_i4	53	73	5.45221e-16	0.215859	Upregulated	SA-p vs SA
TRINITY_DN1432_c0_g1_i2	693	2	5.36129e-30	-0.564369	Downregulated	SA-p vs SA
TRINITY_DN14395_c1_g1_i3	403	2	9.07606e-20	-0.495797	Downregulated	SA-p vs SA
TRINITY_DN14395_c1_g1_i4	4945.63	6	5.37528e-85	-0.673992	Downregulated	SA-p vs SA
TRINITY_DN144_c0_g1_i4	275	1	7.66526e-16	-0.535135	Downregulated	SA-p vs SA
TRINITY_DN144_c0_g2_i1	1	31	1.17118e-12	0.609742	Upregulated	SA-p vs SA
TRINITY_DN1453_c0_g1_i7	110.86	1	6.09387e-07	-0.420214	Downregulated	SA-p vs SA
TRINITY_DN1453_c1_g1_i1	490	1	6.85812e-25	-0.608203	Downregulated	SA-p vs SA
TRINITY_DN1456_c0_g3_i1	363	1	9.28004e-20	-0.570254	Downregulated	SA-p vs SA
TRINITY_DN14573_c0_g1_i1	73	2	0.00125538	-0.279683	Downregulated	SA-p vs SA
TRINITY_DN146_c0_g2_i3	7.09	583.53	1.52717e-98	0.733255	Upregulated	SA-p vs SA
TRINITY_DN146_c1_g4_i1	24	13305	3.38042e-232	0.974536	Upregulated	SA-p vs SA
TRINITY_DN1461_c0_g1_i1	916	2	5.52441e-37	-0.59966	Downregulated	SA-p vs SA
TRINITY_DN1461_c1_g1_i2	6060.57	23	2.46681e-77	-0.529733	Downregulated	SA-p vs SA
TRINITY_DN1461_c1_g2_i1	548	1	6.71058e-27	-0.622354	Downregulated	SA-p vs SA
TRINITY_DN1461_c1_g3_i2	203.83	8	2.51695e-06	-0.234212	Downregulated	SA-p vs SA
TRINITY_DN1467_c0_g2_i1	4598	2	7.96223e-88	-0.803742	Downregulated	SA-p vs SA
TRINITY_DN14690_c0_g2_i2	13.27	13.91	0.000421961	0.181318	Upregulated	SA-p vs SA
TRINITY_DN14690_c0_g2_i4	32.73	38.09	2.8254e-09	0.194544	Upregulated	SA-p vs SA
TRINITY_DN1479_c0_g1_i1	14	1498	4.00215e-138	0.76645	Upregulated	SA-p vs SA
TRINITY_DN149_c1_g3_i2	24	273.6	6.40284e-69	0.4832	Upregulated	SA-p vs SA
TRINITY_DN1491_c0_g1_i1	584	3	2.47647e-25	-0.491433	Downregulated	SA-p vs SA
TRINITY_DN1496_c0_g1_i1	47	13466	1.64928e-223	0.891041	Upregulated	SA-p vs SA
TRINITY_DN1497_c1_g1_i2	530.78	1	3.16028e-26	-0.618315	Downregulated	SA-p vs SA
TRINITY_DN1497_c1_g1_i4	279.81	1	1.36262e-15	-0.537328	Downregulated	SA-p vs SA
TRINITY_DN1497_c2_g1_i1	3638.19	2	2.06165e-79	-0.774125	Downregulated	SA-p vs SA
TRINITY_DN1497_c2_g1_i2	74.81	4	0.00931543	-0.195102	Downregulated	SA-p vs SA
TRINITY_DN15_c0_g1_i10	1018.95	2	1.62714e-39	-0.613133	Downregulated	SA-p vs SA
TRINITY_DN15_c0_g1_i13	610.29	1	6.10839e-29	-0.635972	Downregulated	SA-p vs SA
TRINITY_DN150_c0_g2_i6	1	745.93	1.32759e-108	1.01208	Upregulated	SA-p vs SA
TRINITY_DN150_c1_g1_i1	9	5958	2.04379e-197	0.996979	Upregulated	SA-p vs SA
TRINITY_DN15005_c0_g1_i1	15	609	2.32481e-100	0.643868	Upregulated	SA-p vs SA
TRINITY_DN1501_c0_g5_i1	28	6406	1.42042e-200	0.862581	Upregulated	SA-p vs SA
TRINITY_DN1501_c0_g6_i1	1	22842	1.28687e-255	1.44491	Upregulated	SA-p vs SA
TRINITY_DN1501_c1_g1_i1	1	447	1.65735e-87	0.947303	Upregulated	SA-p vs SA
TRINITY_DN15036_c0_g1_i2	14	22.81	7.82344e-08	0.237107	Upregulated	SA-p vs SA
TRINITY_DN1513_c0_g1_i1	43	34180	3.93255e-265	1.02012	Upregulated	SA-p vs SA
TRINITY_DN15195_c0_g1_i1	1158	1	2.18169e-44	-0.716994	Downregulated	SA-p vs SA
TRINITY_DN152_c0_g1_i1	67046	12	3.33357e-186	-0.91607	Downregulated	SA-p vs SA
TRINITY_DN1525_c0_g1_i1	1014	3	8.74468e-38	-0.561228	Downregulated	SA-p vs SA
TRINITY_DN15285_c1_g1_i1	58	1	0.00190528	-0.338267	Downregulated	SA-p vs SA
TRINITY_DN153_c0_g1_i14	350.28	2	1.46529e-17	-0.478062	Downregulated	SA-p vs SA
TRINITY_DN153_c0_g1_i3	202	1	1.20784e-11	-0.496111	Downregulated	SA-p vs SA
TRINITY_DN1535_c0_g2_i1	11	11352	2.59246e-225	1.05314	Upregulated	SA-p vs SA
TRINITY_DN1541_c1_g1_i1	518	1	1.21418e-25	-0.615232	Downregulated	SA-p vs SA
TRINITY_DN1547_c0_g1_i1	314	5	8.23857e-13	-0.348325	Downregulated	SA-p vs SA
TRINITY_DN1559_c0_g3_i1	1540	1	6.74213e-53	-0.753056	Downregulated	SA-p vs SA
TRINITY_DN156_c0_g3_i2	12.89	12829.6	1.28577e-230	1.04856	Upregulated	SA-p vs SA
TRINITY_DN156_c0_g3_i3	38	3903.03	1.61285e-175	0.761275	Upregulated	SA-p vs SA
TRINITY_DN156_c0_g5_i1	3	54955.1	1.03011e-293	1.41699	Upregulated	SA-p vs SA
TRINITY_DN1562_c0_g2_i1	171.15	1	4.8108e-10	-0.475147	Downregulated	SA-p vs SA
TRINITY_DN157_c0_g1_i3	268	1	2.59759e-15	-0.531873	Downregulated	SA-p vs SA
TRINITY_DN157_c0_g2_i3	3378.35	7	4.16162e-70	-0.606284	Downregulated	SA-p vs SA
TRINITY_DN1590_c0_g1_i2	590.16	1	1.11531e-28	-0.631729	Downregulated	SA-p vs SA
TRINITY_DN1590_c0_g2_i1	733	259	0.00015565	0.0437643	Upregulated	SA-p vs SA
TRINITY_DN1591_c0_g1_i1	1311	13	2.35517e-34	-0.408238	Downregulated	SA-p vs SA
TRINITY_DN1593_c0_g4_i1	1	20131	3.88432e-250	1.42893	Upregulated	SA-p vs SA
TRINITY_DN1593_c0_g6_i1	64	9560	1.88773e-200	0.808652	Upregulated	SA-p vs SA
TRINITY_DN1593_c1_g1_i2	1	1961	1.44558e-149	1.13435	Upregulated	SA-p vs SA
TRINITY_DN1594_c0_g3_i1	2	2852	1.22522e-165	1.09405	Upregulated	SA-p vs SA
TRINITY_DN16093_c0_g1_i1	65	1	0.00057344	-0.35268	Downregulated	SA-p vs SA
TRINITY_DN161_c0_g1_i1	151540	18.22	3.15946e-216	-0.966397	Downregulated	SA-p vs SA
TRINITY_DN161_c0_g1_i3	36332.6	22.78	1.09715e-150	-0.75749	Downregulated	SA-p vs SA
TRINITY_DN162_c0_g1_i1	661.58	1	5.85497e-31	-0.64618	Downregulated	SA-p vs SA
TRINITY_DN162_c0_g1_i5	469.85	1	5.73585e-24	-0.602891	Downregulated	SA-p vs SA
TRINITY_DN16206_c0_g1_i1	25	193	2.75918e-56	0.433892	Upregulated	SA-p vs SA
TRINITY_DN16291_c0_g1_i1	189	1	3.03407e-11	-0.487696	Downregulated	SA-p vs SA
TRINITY_DN163_c0_g2_i1	641	1	3.52253e-30	-0.642182	Downregulated	SA-p vs SA
TRINITY_DN1630_c0_g2_i1	67	68431	7.25403e-285	1.05183	Upregulated	SA-p vs SA
TRINITY_DN16321_c0_g1_i1	487	4	2.08488e-20	-0.432066	Downregulated	SA-p vs SA
TRINITY_DN16352_c0_g1_i1	15	34	1.26833e-12	0.278872	Upregulated	SA-p vs SA
TRINITY_DN164_c0_g1_i4	2398.01	1	2.40717e-66	-0.809076	Downregulated	SA-p vs SA
TRINITY_DN1643_c0_g1_i1	327	1	3.0106e-18	-0.557042	Downregulated	SA-p vs SA
TRINITY_DN1646_c0_g1_i4	218923	358	3.51694e-145	-0.636226	Downregulated	SA-p vs SA
TRINITY_DN1646_c1_g1_i2	4176	5	6.18382e-80	-0.675658	Downregulated	SA-p vs SA
TRINITY_DN1649_c0_g1_i2	8	86.1	4.33762e-31	0.475921	Upregulated	SA-p vs SA
TRINITY_DN1650_c0_g1_i1	156	149052	6.84518e-295	1.04339	Upregulated	SA-p vs SA
TRINITY_DN1650_c0_g2_i1	8	3177	2.66509e-170	0.932338	Upregulated	SA-p vs SA
TRINITY_DN16513_c0_g1_i6	3465.56	1.59	1.34241e-77	-0.796996	Downregulated	SA-p vs SA
TRINITY_DN1652_c0_g1_i1	95.81	1	9.1596e-06	-0.401758	Downregulated	SA-p vs SA
TRINITY_DN1652_c0_g1_i3	1679.19	2	1.79596e-53	-0.676322	Downregulated	SA-p vs SA
TRINITY_DN16616_c0_g1_i6	299	1	9.55611e-17	-0.545719	Downregulated	SA-p vs SA
TRINITY_DN1668_c0_g2_i1	391	1	1.307e-20	-0.579653	Downregulated	SA-p vs SA
TRINITY_DN167_c0_g1_i1	621	1	2.18566e-29	-0.638173	Downregulated	SA-p vs SA
TRINITY_DN167_c0_g2_i2	637.93	1	4.3079e-30	-0.641575	Downregulated	SA-p vs SA
TRINITY_DN17_c0_g2_i3	433	12.09	1.32812e-12	-0.277286	Downregulated	SA-p vs SA
TRINITY_DN170_c1_g1_i1	81359.9	120	1.88831e-142	-0.649281	Downregulated	SA-p vs SA
TRINITY_DN171_c0_g1_i1	3420	4	2.10115e-74	-0.678622	Downregulated	SA-p vs SA
TRINITY_DN17111_c0_g2_i1	332	1	4.33104e-18	-0.558962	Downregulated	SA-p vs SA
TRINITY_DN17139_c0_g2_i1	228	1	2.34453e-13	-0.511426	Downregulated	SA-p vs SA
TRINITY_DN17139_c0_g3_i1	1716	5	3.89639e-50	-0.563159	Downregulated	SA-p vs SA
TRINITY_DN17139_c0_g3_i3	592	1	9.02819e-29	-0.632123	Downregulated	SA-p vs SA
TRINITY_DN17139_c1_g2_i1	475.51	1	2.81292e-24	-0.604406	Downregulated	SA-p vs SA
TRINITY_DN1717_c0_g1_i1	56	93	8.36967e-21	0.239524	Upregulated	SA-p vs SA
TRINITY_DN17198_c0_g1_i1	292	1	3.09211e-16	-0.542722	Downregulated	SA-p vs SA
TRINITY_DN172_c0_g1_i7	329.33	21	1.24369e-05	-0.172823	Downregulated	SA-p vs SA
TRINITY_DN172_c0_g1_i9	185.49	2	1.27256e-09	-0.397645	Downregulated	SA-p vs SA
TRINITY_DN1721_c0_g1_i1	1122.79	1	4.61023e-44	-0.713088	Downregulated	SA-p vs SA
TRINITY_DN17219_c0_g1_i1	13	7307	3.02077e-206	0.976281	Upregulated	SA-p vs SA
TRINITY_DN173_c0_g2_i1	4	44867	6.5362e-285	1.35495	Upregulated	SA-p vs SA
TRINITY_DN1735_c0_g1_i1	3612	5	6.20657e-75	-0.657305	Downregulated	SA-p vs SA
TRINITY_DN1743_c0_g2_i1	1471	2	1.09609e-49	-0.659578	Downregulated	SA-p vs SA
TRINITY_DN1746_c0_g1_i1	64	23045	1.53567e-238	0.919951	Upregulated	SA-p vs SA
TRINITY_DN1750_c0_g1_i3	340	1	1.88102e-18	-0.561974	Downregulated	SA-p vs SA
TRINITY_DN1760_c0_g1_i6	540.71	1	1.30016e-26	-0.62066	Downregulated	SA-p vs SA
TRINITY_DN17733_c0_g1_i1	506	1	1.3518e-25	-0.612267	Downregulated	SA-p vs SA
TRINITY_DN1775_c0_g1_i1	2030.21	1	4.66898e-61	-0.788014	Downregulated	SA-p vs SA
TRINITY_DN179_c0_g1_i6	86	1	2.54877e-05	-0.388094	Downregulated	SA-p vs SA
TRINITY_DN1792_c0_g1_i1	88	26500	1.08823e-236	0.897339	Upregulated	SA-p vs SA
TRINITY_DN1799_c1_g1_i1	3421.1	4	1.98441e-74	-0.678663	Downregulated	SA-p vs SA
TRINITY_DN1799_c2_g2_i1	2548	3	3.31685e-65	-0.677781	Downregulated	SA-p vs SA
TRINITY_DN180_c0_g1_i1	7977	8	1.44864e-101	-0.698074	Downregulated	SA-p vs SA
TRINITY_DN180_c0_g4_i1	3844	1	1.15542e-82	-0.868766	Downregulated	SA-p vs SA
TRINITY_DN1801_c0_g1_i1	16278	4	2.26239e-135	-0.875977	Downregulated	SA-p vs SA
TRINITY_DN1802_c1_g1_i1	963.85	1	1.63112e-39	-0.693781	Downregulated	SA-p vs SA
TRINITY_DN1831_c1_g1_i1	3318	7	1.97236e-69	-0.604003	Downregulated	SA-p vs SA
TRINITY_DN1837_c0_g2_i1	2756.54	13.93	5.25459e-56	-0.493507	Downregulated	SA-p vs SA
TRINITY_DN1837_c0_g2_i2	1779.76	1.07	3.8279e-57	-0.762801	Downregulated	SA-p vs SA
TRINITY_DN184_c1_g2_i3	259.26	1	8.90397e-15	-0.527679	Downregulated	SA-p vs SA
TRINITY_DN1867_c0_g2_i1	6925.34	1.52	1.83446e-103	-0.890265	Downregulated	SA-p vs SA
TRINITY_DN1867_c0_g2_i2	61.66	1.48	0.000857787	-0.296416	Downregulated	SA-p vs SA
TRINITY_DN1867_c0_g3_i1	341	1	1.42632e-18	-0.562345	Downregulated	SA-p vs SA
TRINITY_DN18843_c0_g1_i1	20	19	4.17025e-05	0.168871	Upregulated	SA-p vs SA
TRINITY_DN19_c1_g1_i14	141.13	2	1.65417e-07	-0.363072	Downregulated	SA-p vs SA
TRINITY_DN19_c9_g1_i1	2268	81	2.53241e-21	-0.246148	Downregulated	SA-p vs SA
TRINITY_DN191_c0_g2_i1	26393	14	9.38761e-145	-0.778641	Downregulated	SA-p vs SA
TRINITY_DN19132_c0_g2_i1	12	13	0.000672116	0.185484	Upregulated	SA-p vs SA
TRINITY_DN1917_c0_g1_i1	1	1867	1.83661e-147	1.12813	Upregulated	SA-p vs SA
TRINITY_DN1922_c0_g2_i1	2469.87	4	4.40118e-63	-0.637451	Downregulated	SA-p vs SA
TRINITY_DN1922_c0_g4_i1	3333	1	7.79147e-78	-0.850722	Downregulated	SA-p vs SA
TRINITY_DN193_c0_g1_i1	1202.84	4.76	6.03372e-40	-0.524436	Downregulated	SA-p vs SA
TRINITY_DN193_c0_g1_i13	959.68	1.6	9.54689e-38	-0.633779	Downregulated	SA-p vs SA
TRINITY_DN193_c0_g1_i9	3548.15	4.64	2.87803e-74	-0.664501	Downregulated	SA-p vs SA
TRINITY_DN194_c1_g1_i1	25	6592	8.29238e-202	0.880537	Upregulated	SA-p vs SA
TRINITY_DN194_c1_g2_i5	17	1962.86	1.13524e-149	0.776078	Upregulated	SA-p vs SA
TRINITY_DN1944_c0_g1_i1	5	2157	1.17412e-153	0.94281	Upregulated	SA-p vs SA
TRINITY_DN195_c0_g1_i2	480	1	1.75375e-24	-0.605595	Downregulated	SA-p vs SA
TRINITY_DN1954_c0_g8_i1	10	1722	4.83093e-144	0.82664	Upregulated	SA-p vs SA
TRINITY_DN1956_c0_g2_i1	329	3	1.61713e-15	-0.418845	Downregulated	SA-p vs SA
TRINITY_DN1956_c0_g4_i1	238	1	4.67721e-14	-0.516856	Downregulated	SA-p vs SA
TRINITY_DN19861_c0_g1_i1	1	57	1.35626e-21	0.686786	Upregulated	SA-p vs SA
TRINITY_DN1988_c0_g1_i1	1918	1	1.0689e-59	-0.780822	Downregulated	SA-p vs SA
TRINITY_DN1988_c1_g1_i1	814	1	7.1922e-36	-0.672406	Downregulated	SA-p vs SA
TRINITY_DN199_c1_g1_i1	290	1	4.1542e-16	-0.541853	Downregulated	SA-p vs SA
TRINITY_DN1990_c0_g1_i2	2517.01	2	2.28608e-66	-0.727522	Downregulated	SA-p vs SA
TRINITY_DN1990_c0_g1_i7	2.87978e+06	4975	7.32052e-147	-0.629282	Downregulated	SA-p vs SA
TRINITY_DN1992_c0_g1_i1	21	24	1.33121e-06	0.192251	Upregulated	SA-p vs SA
TRINITY_DN1992_c0_g1_i4	13	37	9.9007e-15	0.307669	Upregulated	SA-p vs SA
TRINITY_DN1996_c0_g1_i3	22.44	13.47	0.0120982	0.110799	Upregulated	SA-p vs SA
TRINITY_DN1996_c0_g1_i5	28.56	28.53	6.09387e-07	0.175226	Upregulated	SA-p vs SA
TRINITY_DN1996_c1_g1_i2	53	61	1.40211e-12	0.193142	Upregulated	SA-p vs SA
TRINITY_DN2_c0_g1_i1	6185.57	11	2.08962e-88	-0.625618	Downregulated	SA-p vs SA
TRINITY_DN2_c0_g4_i1	2205	1	5.99426e-64	-0.798461	Downregulated	SA-p vs SA
TRINITY_DN2_c0_g5_i1	41615.4	16	3.70978e-162	-0.819353	Downregulated	SA-p vs SA
TRINITY_DN2007_c2_g1_i1	217	1	1.19683e-12	-0.505171	Downregulated	SA-p vs SA
TRINITY_DN201_c0_g3_i1	152	1	4.03391e-09	-0.460137	Downregulated	SA-p vs SA
TRINITY_DN20118_c0_g3_i2	1	12831	1.30339e-230	1.37196	Upregulated	SA-p vs SA
TRINITY_DN2025_c0_g2_i1	50230	56	1.2521e-144	-0.684683	Downregulated	SA-p vs SA
TRINITY_DN2025_c1_g2_i1	159	1	1.37065e-09	-0.465832	Downregulated	SA-p vs SA
TRINITY_DN203_c0_g2_i3	73.9	1	7.45732e-05	-0.368913	Downregulated	SA-p vs SA
TRINITY_DN20307_c0_g2_i1	34	16755	3.42679e-240	0.959641	Upregulated	SA-p vs SA
TRINITY_DN2042_c0_g1_i2	1370.35	6.18	4.28377e-42	-0.507905	Downregulated	SA-p vs SA
TRINITY_DN2042_c0_g1_i3	1316.65	1.82	1.00607e-46	-0.657486	Downregulated	SA-p vs SA
TRINITY_DN2042_c0_g3_i1	3540	3	9.56644e-77	-0.719375	Downregulated	SA-p vs SA
TRINITY_DN2042_c1_g1_i2	1463.04	2.63	6.61205e-48	-0.624253	Downregulated	SA-p vs SA
TRINITY_DN2042_c1_g1_i3	1775.32	3.37	1.02771e-53	-0.617363	Downregulated	SA-p vs SA
TRINITY_DN2045_c0_g2_i1	2595	1	3.38308e-69	-0.819062	Downregulated	SA-p vs SA
TRINITY_DN205_c0_g1_i1	1	360	7.74103e-79	0.919923	Upregulated	SA-p vs SA
TRINITY_DN205_c0_g3_i1	21	833.05	1.98565e-113	0.640934	Upregulated	SA-p vs SA
TRINITY_DN207_c0_g1_i1	698	2	3.68117e-30	-0.565279	Downregulated	SA-p vs SA
TRINITY_DN208_c0_g1_i4	62	1	0.000857787	-0.346703	Downregulated	SA-p vs SA
TRINITY_DN20825_c0_g5_i1	24	3244	3.11547e-171	0.796009	Upregulated	SA-p vs SA
TRINITY_DN2087_c0_g2_i1	184	1	6.03101e-11	-0.484305	Downregulated	SA-p vs SA
TRINITY_DN2098_c0_g1_i2	436.74	1	6.28123e-23	-0.593647	Downregulated	SA-p vs SA
TRINITY_DN2098_c0_g1_i4	4924.6	1	3.00787e-92	-0.900102	Downregulated	SA-p vs SA
TRINITY_DN21_c0_g1_i6	2033	1	4.26991e-61	-0.788188	Downregulated	SA-p vs SA
TRINITY_DN210_c0_g1_i2	674	73	0.00237953	-0.10581	Downregulated	SA-p vs SA
TRINITY_DN210_c0_g2_i1	512	2	8.28855e-24	-0.526079	Downregulated	SA-p vs SA
TRINITY_DN2114_c0_g1_i2	362	0.5	5.82322e-22	-0.657585	Downregulated	SA-p vs SA
TRINITY_DN21196_c0_g2_i1	298	2	3.59921e-15	-0.457616	Downregulated	SA-p vs SA
TRINITY_DN212_c1_g1_i8	221	1	6.22166e-13	-0.507482	Downregulated	SA-p vs SA
TRINITY_DN212_c1_g2_i2	515.32	3.6	1.25777e-21	-0.452544	Downregulated	SA-p vs SA
TRINITY_DN21214_c1_g1_i1	2	2782	1.4352e-164	1.0909	Upregulated	SA-p vs SA
TRINITY_DN2125_c0_g3_i1	17	17485	4.92192e-244	1.05272	Upregulated	SA-p vs SA
TRINITY_DN21296_c0_g5_i1	16	1784	1.37666e-145	0.771661	Upregulated	SA-p vs SA
TRINITY_DN2132_c0_g2_i2	842.53	1	2.84944e-36	-0.676764	Downregulated	SA-p vs SA
TRINITY_DN2132_c0_g6_i1	1192	1	2.49726e-45	-0.720655	Downregulated	SA-p vs SA
TRINITY_DN2132_c0_g7_i1	2748	6	5.59542e-64	-0.59966	Downregulated	SA-p vs SA
TRINITY_DN21343_c0_g1_i2	137	5	6.51406e-05	-0.243408	Downregulated	SA-p vs SA
TRINITY_DN2147_c0_g2_i4	509.12	1	8.53705e-26	-0.613045	Downregulated	SA-p vs SA
TRINITY_DN2148_c0_g1_i1	1	14439	9.96752e-236	1.38689	Upregulated	SA-p vs SA
TRINITY_DN215_c0_g1_i3	29	7313	2.66538e-206	0.874892	Upregulated	SA-p vs SA
TRINITY_DN2150_c1_g3_i1	14388	14	2.49883e-119	-0.701896	Downregulated	SA-p vs SA
TRINITY_DN2153_c0_g2_i1	451	1	5.00038e-23	-0.597712	Downregulated	SA-p vs SA
TRINITY_DN216_c0_g1_i10	18957	79	1.93229e-94	-0.517895	Downregulated	SA-p vs SA
TRINITY_DN217_c0_g2_i1	23	4194	2.72967e-182	0.833883	Upregulated	SA-p vs SA
TRINITY_DN2173_c0_g1_i6	3324.49	19	1.51456e-58	-0.477942	Downregulated	SA-p vs SA
TRINITY_DN219_c0_g3_i1	7	4397	2.70782e-184	0.990338	Upregulated	SA-p vs SA
TRINITY_DN22_c0_g1_i3	10	9264.26	1.64659e-216	1.03949	Upregulated	SA-p vs SA
TRINITY_DN2209_c0_g1_i1	30	54	1.52741e-15	0.249712	Upregulated	SA-p vs SA
TRINITY_DN226_c0_g1_i12	14690.3	2	8.15513e-134	-0.950675	Downregulated	SA-p vs SA
TRINITY_DN226_c0_g1_i18	22855.8	1	1.3488e-153	-1.09427	Downregulated	SA-p vs SA
TRINITY_DN226_c0_g2_i3	222.79	1	4.49065e-13	-0.508502	Downregulated	SA-p vs SA
TRINITY_DN227_c0_g1_i3	67	3	0.00660661	-0.217545	Downregulated	SA-p vs SA
TRINITY_DN2270_c0_g1_i1	13104	11	2.56927e-118	-0.720578	Downregulated	SA-p vs SA
TRINITY_DN228_c0_g1_i1	289	2	1.11799e-14	-0.453736	Downregulated	SA-p vs SA
TRINITY_DN229_c0_g1_i2	735	4	1.17672e-28	-0.484133	Downregulated	SA-p vs SA
TRINITY_DN229_c0_g2_i3	82	2	0.000296643	-0.294389	Downregulated	SA-p vs SA
TRINITY_DN229_c0_g2_i8	54	2	0.00841274	-0.241548	Downregulated	SA-p vs SA
TRINITY_DN229_c2_g1_i1	74	1	7.45732e-05	-0.369084	Downregulated	SA-p vs SA
TRINITY_DN2292_c0_g1_i1	311	1	2.23594e-17	-0.550696	Downregulated	SA-p vs SA
TRINITY_DN2298_c3_g2_i1	2	4857	1.40279e-188	1.16139	Upregulated	SA-p vs SA
TRINITY_DN23_c0_g1_i1	1	1119.02	1.14279e-125	1.06338	Upregulated	SA-p vs SA
TRINITY_DN230_c0_g4_i4	18253.5	2	2.2938e-142	-0.978146	Downregulated	SA-p vs SA
TRINITY_DN2301_c0_g1_i1	26	10096	3.02177e-220	0.929498	Upregulated	SA-p vs SA
TRINITY_DN232_c0_g5_i1	1.13	7974.42	5.20302e-210	1.29633	Upregulated	SA-p vs SA
TRINITY_DN232_c0_g5_i2	24.87	12385.6	4.24584e-229	0.960974	Upregulated	SA-p vs SA
TRINITY_DN2325_c0_g1_i1	446	1	8.13729e-23	-0.596301	Downregulated	SA-p vs SA
TRINITY_DN2339_c0_g2_i1	912	1	1.67871e-38	-0.686786	Downregulated	SA-p vs SA
TRINITY_DN234_c0_g1_i1	92.74	0.5	1.55011e-07	-0.485318	Downregulated	SA-p vs SA
TRINITY_DN234_c0_g1_i2	69.26	0.5	6.16451e-06	-0.44839	Downregulated	SA-p vs SA
TRINITY_DN2344_c0_g1_i2	160	1	9.57528e-10	-0.466625	Downregulated	SA-p vs SA
TRINITY_DN2344_c0_g2_i4	1005.55	2	3.96676e-39	-0.611458	Downregulated	SA-p vs SA
TRINITY_DN2344_c0_g3_i1	1635	1	2.7087e-54	-0.760629	Downregulated	SA-p vs SA
TRINITY_DN2346_c0_g1_i1	733	1	4.65495e-33	-0.659147	Downregulated	SA-p vs SA
TRINITY_DN2356_c0_g2_i1	92	1	7.6953e-06	-0.396625	Downregulated	SA-p vs SA
TRINITY_DN2356_c0_g3_i1	141.69	1.87	1.65417e-07	-0.372074	Downregulated	SA-p vs SA
TRINITY_DN2356_c0_g3_i2	1905.31	0.13	2.75696e-61	-1.03806	Downregulated	SA-p vs SA
TRINITY_DN2356_c0_g4_i1	99	1	6.22296e-06	-0.405901	Downregulated	SA-p vs SA
TRINITY_DN2357_c2_g1_i1	245	1	5.77237e-14	-0.520523	Downregulated	SA-p vs SA
TRINITY_DN236_c0_g1_i1	402.23	9.5	1.07904e-12	-0.298458	Downregulated	SA-p vs SA
TRINITY_DN236_c0_g1_i6	2835.81	9.5	9.00757e-61	-0.54551	Downregulated	SA-p vs SA
TRINITY_DN2368_c1_g2_i1	779	1	1.01628e-34	-0.666847	Downregulated	SA-p vs SA
TRINITY_DN237_c1_g3_i1	222	3	9.83617e-11	-0.369084	Downregulated	SA-p vs SA
TRINITY_DN2372_c0_g2_i1	36	1	0.0231566	-0.277938	Downregulated	SA-p vs SA
TRINITY_DN238_c0_g2_i2	19	5963.67	1.79201e-197	0.90258	Upregulated	SA-p vs SA
TRINITY_DN2383_c1_g1_i2	2010.54	1	9.56956e-61	-0.786783	Downregulated	SA-p vs SA
TRINITY_DN2383_c2_g1_i3	586	1	1.70424e-28	-0.630835	Downregulated	SA-p vs SA
TRINITY_DN23890_c0_g1_i1	1	540	3.11282e-95	0.971212	Upregulated	SA-p vs SA
TRINITY_DN240_c0_g1_i1	177	1	1.69856e-10	-0.479398	Downregulated	SA-p vs SA
TRINITY_DN240_c0_g2_i10	1237.59	3	3.11609e-43	-0.586433	Downregulated	SA-p vs SA
TRINITY_DN240_c0_g2_i8	1793.21	9	7.87074e-47	-0.494374	Downregulated	SA-p vs SA
TRINITY_DN241_c0_g1_i1	523.14	1.29	7.738e-26	-0.58427	Downregulated	SA-p vs SA
TRINITY_DN241_c0_g1_i3	774.5	1	1.45413e-34	-0.666114	Downregulated	SA-p vs SA
TRINITY_DN24168_c0_g6_i1	46	40602	2.35026e-271	1.03337	Upregulated	SA-p vs SA
TRINITY_DN242_c0_g2_i3	138	8	0.00122608	-0.184875	Downregulated	SA-p vs SA
TRINITY_DN242_c0_g3_i1	90	4	0.00191784	-0.218485	Downregulated	SA-p vs SA
TRINITY_DN243_c0_g1_i6	241.79	14.64	7.89695e-05	-0.179372	Downregulated	SA-p vs SA
TRINITY_DN2435_c0_g1_i2	2802	3	1.21867e-68	-0.689801	Downregulated	SA-p vs SA
TRINITY_DN245_c1_g1_i1	41	1745	3.82722e-138	0.649835	Upregulated	SA-p vs SA
TRINITY_DN247_c0_g1_i1	937	4	1.29518e-34	-0.514847	Downregulated	SA-p vs SA
TRINITY_DN2472_c0_g1_i1	5279	3	1.41029e-91	-0.769924	Downregulated	SA-p vs SA
TRINITY_DN2473_c0_g2_i4	157.33	3	2.02823e-07	-0.325528	Downregulated	SA-p vs SA
TRINITY_DN2473_c0_g2_i7	642	1	3.52253e-30	-0.64238	Downregulated	SA-p vs SA
TRINITY_DN2485_c0_g1_i3	12128	7.08	1.31889e-119	-0.766523	Downregulated	SA-p vs SA
TRINITY_DN2485_c0_g1_i9	6611.81	1.92	1.31355e-101	-0.854853	Downregulated	SA-p vs SA
TRINITY_DN2485_c1_g1_i1	657	1	8.70105e-31	-0.645301	Downregulated	SA-p vs SA
TRINITY_DN24941_c0_g1_i1	13	10	0.00664724	0.142172	Upregulated	SA-p vs SA
TRINITY_DN25_c0_g1_i10	12	2591.7	1.46752e-161	0.855292	Upregulated	SA-p vs SA
TRINITY_DN25_c0_g1_i11	13.96	4716.09	2.50079e-187	0.911882	Upregulated	SA-p vs SA
TRINITY_DN25_c0_g1_i6	3.04	9343.64	7.08022e-217	1.19119	Upregulated	SA-p vs SA
TRINITY_DN25_c0_g2_i1	2	7724.35	1.23481e-208	1.22008	Upregulated	SA-p vs SA
TRINITY_DN2529_c0_g1_i1	81	2	0.000296643	-0.292837	Downregulated	SA-p vs SA
TRINITY_DN25381_c0_g1_i1	7	5741.98	8.08069e-196	1.0241	Upregulated	SA-p vs SA
TRINITY_DN25381_c0_g3_i2	8	2350.9	2.31002e-157	0.894246	Upregulated	SA-p vs SA
TRINITY_DN254_c0_g1_i2	50	1	0.00429585	-0.319492	Downregulated	SA-p vs SA
TRINITY_DN25407_c0_g1_i1	38	38	1.60135e-08	0.175359	Upregulated	SA-p vs SA
TRINITY_DN2546_c0_g1_i1	7551.53	34.45	1.44129e-78	-0.506449	Downregulated	SA-p vs SA
TRINITY_DN2546_c0_g1_i12	12211	12.55	2.37017e-113	-0.694975	Downregulated	SA-p vs SA
TRINITY_DN2546_c0_g2_i1	518	1	1.21418e-25	-0.615232	Downregulated	SA-p vs SA
TRINITY_DN255_c0_g1_i4	2289	34	2.96437e-37	-0.357123	Downregulated	SA-p vs SA
TRINITY_DN2554_c0_g1_i1	560	1	1.80927e-27	-0.625094	Downregulated	SA-p vs SA
TRINITY_DN256_c0_g5_i1	17	16158	1.30124e-240	1.04273	Upregulated	SA-p vs SA
TRINITY_DN2574_c0_g1_i1	1887.32	1.74	2.07517e-57	-0.708719	Downregulated	SA-p vs SA
TRINITY_DN2574_c0_g1_i2	93.68	0.26	1.55011e-07	-0.569312	Downregulated	SA-p vs SA
TRINITY_DN2574_c0_g3_i2	358	1	2.09257e-19	-0.568499	Downregulated	SA-p vs SA
TRINITY_DN2574_c0_g4_i1	7178	19	8.343e-87	-0.575306	Downregulated	SA-p vs SA
TRINITY_DN259_c0_g2_i1	5154	5	4.7382e-88	-0.702275	Downregulated	SA-p vs SA
TRINITY_DN2598_c0_g1_i1	549.27	1	5.3877e-27	-0.622647	Downregulated	SA-p vs SA
TRINITY_DN26_c0_g1_i1	21	14592	3.38459e-236	1.00311	Upregulated	SA-p vs SA
TRINITY_DN26_c0_g2_i11	10	3544.76	5.16327e-175	0.917967	Upregulated	SA-p vs SA
TRINITY_DN26_c0_g2_i7	67.98	96071.5	9.89198e-299	1.09291	Upregulated	SA-p vs SA
TRINITY_DN26_c0_g2_i8	1.02	1952.19	2.29674e-149	1.13127	Upregulated	SA-p vs SA
TRINITY_DN260_c0_g1_i1	19346.4	6.54	1.29705e-138	-0.835631	Downregulated	SA-p vs SA
TRINITY_DN260_c0_g1_i3	2091.97	2.23	2.16579e-60	-0.690356	Downregulated	SA-p vs SA
TRINITY_DN260_c0_g1_i4	1711.61	2.23	3.87076e-54	-0.664972	Downregulated	SA-p vs SA
TRINITY_DN260_c0_g2_i1	1191	2	1.32209e-43	-0.632869	Downregulated	SA-p vs SA
TRINITY_DN2606_c0_g2_i2	60.02	1	0.00128011	-0.342597	Downregulated	SA-p vs SA
TRINITY_DN26074_c0_g1_i1	20	14125	8.68565e-235	1.00516	Upregulated	SA-p vs SA
TRINITY_DN261_c0_g2_i1	353	1	3.60962e-19	-0.56672	Downregulated	SA-p vs SA
TRINITY_DN261_c0_g3_i1	6919.71	10.47	1.12106e-93	-0.646051	Downregulated	SA-p vs SA
TRINITY_DN2610_c0_g1_i2	99.28	1	6.22296e-06	-0.406258	Downregulated	SA-p vs SA
TRINITY_DN26102_c0_g1_i1	23	7575	8.18885e-208	0.908666	Upregulated	SA-p vs SA
TRINITY_DN26136_c0_g1_i1	17	4206	2.12974e-182	0.872481	Upregulated	SA-p vs SA
TRINITY_DN2617_c0_g3_i1	5	729	1.03626e-107	0.805588	Upregulated	SA-p vs SA
TRINITY_DN262_c0_g11_i1	1	1934	5.70666e-149	1.13259	Upregulated	SA-p vs SA
TRINITY_DN262_c0_g2_i3	1	4020.58	1.97922e-180	1.22517	Upregulated	SA-p vs SA
TRINITY_DN262_c0_g5_i1	1	10767	5.18085e-223	1.34977	Upregulated	SA-p vs SA
TRINITY_DN262_c0_g7_i1	1	35612	6.95523e-275	1.50108	Upregulated	SA-p vs SA
TRINITY_DN26221_c0_g1_i1	10	2365	1.28503e-157	0.866775	Upregulated	SA-p vs SA
TRINITY_DN2623_c0_g1_i2	146.59	1	8.3061e-09	-0.455553	Downregulated	SA-p vs SA
TRINITY_DN2623_c0_g1_i4	673.78	4	6.74301e-27	-0.473132	Downregulated	SA-p vs SA
TRINITY_DN26236_c0_g1_i1	1	226	6.07067e-61	0.861031	Upregulated	SA-p vs SA
TRINITY_DN26241_c0_g1_i1	57	19890	5.66035e-235	0.915979	Upregulated	SA-p vs SA
TRINITY_DN26284_c0_g1_i1	1	5388	4.64749e-193	1.2622	Upregulated	SA-p vs SA
TRINITY_DN263_c1_g2_i3	3086.36	2.55	3.5205e-72	-0.722586	Downregulated	SA-p vs SA
TRINITY_DN263_c1_g2_i4	111.39	0.45	4.53328e-09	-0.521824	Downregulated	SA-p vs SA
TRINITY_DN26343_c0_g1_i1	25	2503	4.15272e-160	0.758043	Upregulated	SA-p vs SA
TRINITY_DN26370_c0_g1_i4	11	504.76	1.18077e-92	0.659354	Upregulated	SA-p vs SA
TRINITY_DN2638_c0_g1_i1	23	5479	8.10786e-194	0.867691	Upregulated	SA-p vs SA
TRINITY_DN26392_c0_g1_i1	2879	4	4.71103e-68	-0.65684	Downregulated	SA-p vs SA
TRINITY_DN26456_c0_g1_i1	1	5277	3.69648e-192	1.25956	Upregulated	SA-p vs SA
TRINITY_DN26497_c0_g1_i1	345	1	1.08222e-18	-0.563821	Downregulated	SA-p vs SA
TRINITY_DN266_c0_g2_i2	1093.66	2	1.38252e-41	-0.622083	Downregulated	SA-p vs SA
TRINITY_DN26605_c0_g1_i1	1	7359	1.54318e-206	1.30163	Upregulated	SA-p vs SA
TRINITY_DN2666_c0_g1_i1	8134.84	14	4.41651e-96	-0.629764	Downregulated	SA-p vs SA
TRINITY_DN26683_c0_g1_i1	4	5328	1.39169e-192	1.08542	Upregulated	SA-p vs SA
TRINITY_DN267_c0_g1_i4	106	1	1.32245e-06	-0.414543	Downregulated	SA-p vs SA
TRINITY_DN267_c0_g1_i8	61	3	0.0174197	-0.205677	Downregulated	SA-p vs SA
TRINITY_DN26739_c0_g1_i1	10	6796	4.18273e-203	1.0003	Upregulated	SA-p vs SA
TRINITY_DN2674_c1_g1_i1	1172	2	3.84772e-43	-0.630835	Downregulated	SA-p vs SA
TRINITY_DN26969_c0_g1_i1	774	57	7.90897e-07	-0.154606	Downregulated	SA-p vs SA
TRINITY_DN26972_c0_g1_i1	96	1	9.1596e-06	-0.402008	Downregulated	SA-p vs SA
TRINITY_DN270_c0_g1_i2	1350	8	1.43974e-39	-0.473361	Downregulated	SA-p vs SA
TRINITY_DN27019_c0_g1_i1	11	16	2.84737e-05	0.222756	Upregulated	SA-p vs SA
TRINITY_DN2708_c0_g1_i1	78	1	8.39027e-05	-0.375743	Downregulated	SA-p vs SA
TRINITY_DN272_c0_g1_i2	15088.6	9.12	2.36625e-126	-0.762125	Downregulated	SA-p vs SA
TRINITY_DN272_c0_g1_i4	2817.41	6.88	6.05511e-64	-0.585503	Downregulated	SA-p vs SA
TRINITY_DN274_c0_g2_i1	8462	3	6.36841e-110	-0.82961	Downregulated	SA-p vs SA
TRINITY_DN2746_c0_g3_i1	7685.9	6	1.96957e-102	-0.729762	Downregulated	SA-p vs SA
TRINITY_DN2752_c0_g1_i2	1417.1	5	1.73058e-44	-0.53895	Downregulated	SA-p vs SA
TRINITY_DN2758_c0_g1_i1	143.4	1	1.71346e-08	-0.45277	Downregulated	SA-p vs SA
TRINITY_DN2758_c0_g2_i1	1067	5	1.81102e-36	-0.503055	Downregulated	SA-p vs SA
TRINITY_DN276_c0_g1_i3	443.15	2.68	2.88148e-20	-0.470789	Downregulated	SA-p vs SA
TRINITY_DN276_c0_g1_i6	388.37	11.11	1.55485e-11	-0.274219	Downregulated	SA-p vs SA
TRINITY_DN276_c0_g1_i7	3344.51	1.2	5.80199e-78	-0.828095	Downregulated	SA-p vs SA
TRINITY_DN276_c0_g2_i1	65	1	0.00057344	-0.35268	Downregulated	SA-p vs SA
TRINITY_DN2766_c0_g1_i1	2393	1	2.81394e-66	-0.808811	Downregulated	SA-p vs SA
TRINITY_DN277_c0_g1_i3	2357.67	4	2.01793e-61	-0.63157	Downregulated	SA-p vs SA
TRINITY_DN277_c0_g1_i5	88.26	3	0.000820646	-0.252406	Downregulated	SA-p vs SA
TRINITY_DN278_c1_g1_i5	106.34	2	2.69074e-05	-0.327268	Downregulated	SA-p vs SA
TRINITY_DN2782_c0_g1_i1	877	1	1.9503e-37	-0.681836	Downregulated	SA-p vs SA
TRINITY_DN279_c0_g1_i5	733.18	3	5.85649e-30	-0.520209	Downregulated	SA-p vs SA
TRINITY_DN28_c0_g1_i1	86	5067.64	6.17698e-166	0.69099	Upregulated	SA-p vs SA
TRINITY_DN280_c0_g1_i1	235	1.26	8.89311e-14	-0.486017	Downregulated	SA-p vs SA
TRINITY_DN280_c0_g2_i2	248.89	2	1.03903e-12	-0.434836	Downregulated	SA-p vs SA
TRINITY_DN280_c0_g2_i4	2334.68	1	5.67658e-66	-0.80569	Downregulated	SA-p vs SA
TRINITY_DN281_c1_g1_i1	1807.63	8.22	2.73377e-48	-0.506854	Downregulated	SA-p vs SA
TRINITY_DN281_c1_g1_i7	4430.53	0.78	4.03831e-88	-0.918158	Downregulated	SA-p vs SA
TRINITY_DN285_c0_g1_i3	2643.79	1	7.37728e-70	-0.821418	Downregulated	SA-p vs SA
TRINITY_DN285_c0_g1_i9	120.98	3	2.32146e-05	-0.292295	Downregulated	SA-p vs SA
TRINITY_DN28659_c0_g1_i1	51	1	0.00285251	-0.321997	Downregulated	SA-p vs SA
TRINITY_DN288_c0_g1_i1	327	2	9.64974e-17	-0.469363	Downregulated	SA-p vs SA
TRINITY_DN289_c0_g1_i1	24	16126	1.57258e-240	0.99886	Upregulated	SA-p vs SA
TRINITY_DN29_c0_g2_i1	1	20976	6.3964e-252	1.43413	Upregulated	SA-p vs SA
TRINITY_DN290_c1_g1_i1	545	41	8.02823e-06	-0.151911	Downregulated	SA-p vs SA
TRINITY_DN2907_c0_g2_i1	214	1	1.66172e-12	-0.50341	Downregulated	SA-p vs SA
TRINITY_DN292_c0_g1_i13	777.71	8.52	2.96841e-25	-0.395632	Downregulated	SA-p vs SA
TRINITY_DN292_c0_g1_i16	4185	3	4.25325e-83	-0.740548	Downregulated	SA-p vs SA
TRINITY_DN292_c0_g1_i23	5289.99	6	1.30053e-87	-0.682507	Downregulated	SA-p vs SA
TRINITY_DN292_c0_g1_i4	29565	2.48	8.47487e-163	-1.01194	Downregulated	SA-p vs SA
TRINITY_DN292_c0_g2_i1	557	1	2.79569e-27	-0.624414	Downregulated	SA-p vs SA
TRINITY_DN2975_c0_g1_i1	205	1	8.66359e-12	-0.497975	Downregulated	SA-p vs SA
TRINITY_DN298_c0_g1_i2	12043.7	39	5.17163e-94	-0.549804	Downregulated	SA-p vs SA
TRINITY_DN298_c0_g1_i3	217.46	2	2.79492e-11	-0.41776	Downregulated	SA-p vs SA
TRINITY_DN298_c0_g1_i5	329.8	1	5.72638e-18	-0.558121	Downregulated	SA-p vs SA
TRINITY_DN298_c0_g2_i3	1478.3	2	7.78965e-50	-0.660204	Downregulated	SA-p vs SA
TRINITY_DN298_c0_g3_i2	1015	0.5	1.8783e-43	-0.788001	Downregulated	SA-p vs SA
TRINITY_DN2981_c0_g1_i5	19688	72	1.53186e-98	-0.534417	Downregulated	SA-p vs SA
TRINITY_DN299_c0_g1_i4	71.23	1	0.00016937	-0.364258	Downregulated	SA-p vs SA
TRINITY_DN2997_c0_g1_i1	519	1	1.21418e-25	-0.615476	Downregulated	SA-p vs SA
TRINITY_DN3_c0_g1_i2	586.89	0.5	5.46374e-31	-0.718706	Downregulated	SA-p vs SA
TRINITY_DN3_c0_g1_i22	40.13	0.5	0.00041343	-0.379356	Downregulated	SA-p vs SA
TRINITY_DN300_c0_g2_i1	1240	4	8.11979e-42	-0.550289	Downregulated	SA-p vs SA
TRINITY_DN300_c0_g4_i1	50	1	0.00429585	-0.319492	Downregulated	SA-p vs SA
TRINITY_DN3000_c0_g1_i1	20	18417	2.75049e-246	1.03873	Upregulated	SA-p vs SA
TRINITY_DN3001_c0_g2_i1	355	2	8.63017e-18	-0.479755	Downregulated	SA-p vs SA
TRINITY_DN301_c0_g2_i4	249.71	3	5.24496e-12	-0.383963	Downregulated	SA-p vs SA
TRINITY_DN3022_c0_g2_i3	1583.68	1.24	8.34617e-54	-0.729384	Downregulated	SA-p vs SA
TRINITY_DN303_c0_g1_i16	83	3	0.000844689	-0.244633	Downregulated	SA-p vs SA
TRINITY_DN303_c0_g1_i7	1672.06	6	6.087e-48	-0.536815	Downregulated	SA-p vs SA
TRINITY_DN304_c0_g1_i1	283.98	11	6.48875e-08	-0.235877	Downregulated	SA-p vs SA
TRINITY_DN306_c0_g1_i2	17523	53982	1.45698e-67	0.317684	Upregulated	SA-p vs SA
TRINITY_DN307_c0_g1_i1	591	1	9.02819e-29	-0.631909	Downregulated	SA-p vs SA
TRINITY_DN309_c0_g2_i3	718.72	1	1.42499e-32	-0.656659	Downregulated	SA-p vs SA
TRINITY_DN30911_c0_g1_i1	24	28	1.50047e-07	0.194859	Upregulated	SA-p vs SA
TRINITY_DN3092_c0_g1_i3	645	1	2.3579e-30	-0.642969	Downregulated	SA-p vs SA
TRINITY_DN3092_c0_g2_i1	1333	3	1.64977e-45	-0.595828	Downregulated	SA-p vs SA
TRINITY_DN30925_c0_g1_i1	1	163	2.27749e-49	0.819694	Upregulated	SA-p vs SA
TRINITY_DN30926_c0_g1_i1	24	4870	9.89769e-189	0.847402	Upregulated	SA-p vs SA
TRINITY_DN30941_c0_g1_i1	39	12383	7.45737e-224	0.904037	Upregulated	SA-p vs SA
TRINITY_DN30952_c0_g1_i1	3	14975	2.61287e-237	1.25253	Upregulated	SA-p vs SA
TRINITY_DN3096_c0_g2_i3	42.44	1	0.0143062	-0.298756	Downregulated	SA-p vs SA
TRINITY_DN30971_c0_g1_i1	7	1850	4.33117e-147	0.880827	Upregulated	SA-p vs SA
TRINITY_DN30981_c0_g1_i1	1	10969	8.10082e-224	1.35212	Upregulated	SA-p vs SA
TRINITY_DN30994_c0_g1_i1	54	2	0.00841274	-0.241548	Downregulated	SA-p vs SA
TRINITY_DN31_c0_g1_i10	71.71	670.41	2.01389e-85	0.458109	Upregulated	SA-p vs SA
TRINITY_DN31_c0_g1_i11	1934.13	8.06	1.61632e-50	-0.517897	Downregulated	SA-p vs SA
TRINITY_DN31_c0_g1_i3	8841.39	13.51	2.0311e-99	-0.644806	Downregulated	SA-p vs SA
TRINITY_DN31_c0_g1_i7	1049.56	43.43	7.88229e-15	-0.227525	Downregulated	SA-p vs SA
TRINITY_DN310_c0_g1_i1	8887	12	1.31718e-101	-0.66045	Downregulated	SA-p vs SA
TRINITY_DN31002_c0_g1_i1	46	7565	1.4467e-198	0.82082	Upregulated	SA-p vs SA
TRINITY_DN31017_c0_g1_i2	26719.1	39	8.50449e-127	-0.6506	Downregulated	SA-p vs SA
TRINITY_DN31029_c0_g1_i1	11	345	2.1132e-77	0.611217	Upregulated	SA-p vs SA
TRINITY_DN31030_c0_g1_i1	20	29879	2.84024e-267	1.09994	Upregulated	SA-p vs SA
TRINITY_DN31049_c0_g1_i1	4	766	9.65877e-110	0.840077	Upregulated	SA-p vs SA
TRINITY_DN31063_c0_g1_i1	1	2933	7.66397e-167	1.18527	Upregulated	SA-p vs SA
TRINITY_DN31065_c0_g1_i1	42	1	0.0143062	-0.297438	Downregulated	SA-p vs SA
TRINITY_DN311_c0_g1_i1	4615.13	176.23	3.54735e-23	-0.237686	Downregulated	SA-p vs SA
TRINITY_DN311_c0_g1_i19	257	5	1.50054e-10	-0.322986	Downregulated	SA-p vs SA
TRINITY_DN311_c0_g1_i5	17983.9	56.77	3.78982e-101	-0.553028	Downregulated	SA-p vs SA
TRINITY_DN31133_c0_g1_i1	2	550	5.39519e-96	0.885854	Upregulated	SA-p vs SA
TRINITY_DN31219_c0_g1_i1	7	6313	6.45125e-200	1.03609	Upregulated	SA-p vs SA
TRINITY_DN31223_c0_g1_i1	19	20424	9.01095e-251	1.0583	Upregulated	SA-p vs SA
TRINITY_DN31238_c0_g1_i1	324	1	4.00107e-18	-0.555877	Downregulated	SA-p vs SA
TRINITY_DN3128_c0_g1_i2	263	1	4.80239e-15	-0.529491	Downregulated	SA-p vs SA
TRINITY_DN313_c0_g1_i1	21	1853	3.12788e-147	0.742063	Upregulated	SA-p vs SA
TRINITY_DN31323_c0_g1_i1	28	1131	2.61091e-126	0.643221	Upregulated	SA-p vs SA
TRINITY_DN31352_c0_g1_i1	13	1496	4.48798e-138	0.775655	Upregulated	SA-p vs SA
TRINITY_DN31559_c0_g1_i1	144	1	1.71346e-08	-0.453298	Downregulated	SA-p vs SA
TRINITY_DN316_c0_g2_i1	7	17474	5.2919e-244	1.16488	Upregulated	SA-p vs SA
TRINITY_DN31653_c0_g1_i2	14	95	3.32299e-34	0.417575	Upregulated	SA-p vs SA
TRINITY_DN3182_c0_g1_i1	2	18151	1.19573e-245	1.32815	Upregulated	SA-p vs SA
TRINITY_DN3199_c0_g1_i1	193	1	1.53056e-11	-0.490345	Downregulated	SA-p vs SA
TRINITY_DN32_c0_g3_i2	1	2083.31	3.74481e-152	1.142	Upregulated	SA-p vs SA
TRINITY_DN32_c0_g5_i1	1	7856	2.30308e-209	1.3099	Upregulated	SA-p vs SA
TRINITY_DN32_c1_g1_i1	1	2145	2.10172e-153	1.14569	Upregulated	SA-p vs SA
TRINITY_DN3220_c0_g2_i2	23082.6	18	2.656e-135	-0.729898	Downregulated	SA-p vs SA
TRINITY_DN3220_c1_g1_i1	686	2	2.89834e-30	-0.563085	Downregulated	SA-p vs SA
TRINITY_DN3223_c0_g1_i1	336	4	1.20695e-14	-0.385117	Downregulated	SA-p vs SA
TRINITY_DN323_c0_g2_i1	626	4	1.30944e-25	-0.463828	Downregulated	SA-p vs SA
TRINITY_DN323_c0_g4_i2	3440.89	8	1.9302e-69	-0.591713	Downregulated	SA-p vs SA
TRINITY_DN324_c0_g1_i1	71.17	3	0.00607118	-0.225182	Downregulated	SA-p vs SA
TRINITY_DN328_c0_g2_i1	989.6	12	2.51553e-28	-0.382787	Downregulated	SA-p vs SA
TRINITY_DN328_c0_g2_i2	14	33	3.23544e-12	0.283823	Upregulated	SA-p vs SA
TRINITY_DN328_c0_g3_i1	132.57	6	0.000197693	-0.216188	Downregulated	SA-p vs SA
TRINITY_DN3281_c0_g2_i1	961	1	5.09565e-40	-0.693406	Downregulated	SA-p vs SA
TRINITY_DN3298_c0_g2_i1	394	1	7.77611e-21	-0.58062	Downregulated	SA-p vs SA
TRINITY_DN33_c1_g1_i1	7	2680	5.5946e-163	0.92771	Upregulated	SA-p vs SA
TRINITY_DN3308_c0_g1_i1	383	1	2.86057e-20	-0.577038	Downregulated	SA-p vs SA
TRINITY_DN331_c0_g5_i1	1	7113	4.55963e-205	1.29733	Upregulated	SA-p vs SA
TRINITY_DN332_c0_g1_i6	1563	2	1.13402e-51	-0.667252	Downregulated	SA-p vs SA
TRINITY_DN332_c0_g1_i7	49	2	0.0173117	-0.229257	Downregulated	SA-p vs SA
TRINITY_DN332_c0_g1_i8	603	1	1.13712e-28	-0.634452	Downregulated	SA-p vs SA
TRINITY_DN3331_c0_g1_i1	636	1	5.2704e-30	-0.641192	Downregulated	SA-p vs SA
TRINITY_DN3333_c0_g2_i1	1179	1	5.59918e-45	-0.719268	Downregulated	SA-p vs SA
TRINITY_DN3334_c0_g1_i1	184	1	6.03101e-11	-0.484305	Downregulated	SA-p vs SA
TRINITY_DN334_c1_g1_i1	391.17	12	3.25942e-11	-0.26538	Downregulated	SA-p vs SA
TRINITY_DN334_c1_g3_i1	100	1	4.22639e-06	-0.407172	Downregulated	SA-p vs SA
TRINITY_DN334_c2_g1_i2	6564	3	1.13999e-99	-0.797482	Downregulated	SA-p vs SA
TRINITY_DN33457_c0_g1_i1	43	2	0.048953	-0.212734	Downregulated	SA-p vs SA
TRINITY_DN335_c0_g1_i4	672	1	2.18881e-31	-0.648157	Downregulated	SA-p vs SA
TRINITY_DN3364_c0_g2_i2	2	26457	5.43506e-262	1.37581	Upregulated	SA-p vs SA
TRINITY_DN340_c1_g1_i2	505.91	1	1.3518e-25	-0.612245	Downregulated	SA-p vs SA
TRINITY_DN340_c1_g2_i1	418	1	4.65984e-22	-0.5881	Downregulated	SA-p vs SA
TRINITY_DN3401_c0_g1_i1	233.88	0.27	4.69569e-16	-0.680271	Downregulated	SA-p vs SA
TRINITY_DN3401_c0_g1_i10	6320.88	8.69	2.20679e-91	-0.658173	Downregulated	SA-p vs SA
TRINITY_DN3401_c0_g1_i5	4366.18	7.03	2.93234e-79	-0.638189	Downregulated	SA-p vs SA
TRINITY_DN3416_c0_g1_i3	1345.72	2	7.10207e-47	-0.648318	Downregulated	SA-p vs SA
TRINITY_DN3417_c0_g1_i1	897	1	5.23469e-38	-0.684688	Downregulated	SA-p vs SA
TRINITY_DN3420_c0_g2_i2	16	20	2.4095e-06	0.203586	Upregulated	SA-p vs SA
TRINITY_DN3421_c0_g2_i4	7065.99	42.95	7.38285e-71	-0.470147	Downregulated	SA-p vs SA
TRINITY_DN3431_c0_g1_i1	1698	2	7.89902e-54	-0.677731	Downregulated	SA-p vs SA
TRINITY_DN3431_c0_g2_i1	145	1	1.19273e-08	-0.454173	Downregulated	SA-p vs SA
TRINITY_DN3441_c0_g1_i2	65874.8	14	8.47114e-184	-0.894341	Downregulated	SA-p vs SA
TRINITY_DN3441_c1_g1_i3	3889	1.86	6.07762e-82	-0.791738	Downregulated	SA-p vs SA
TRINITY_DN3441_c1_g2_i1	98	2	3.54976e-05	-0.316937	Downregulated	SA-p vs SA
TRINITY_DN3487_c0_g1_i2	126.37	2	7.86979e-07	-0.349098	Downregulated	SA-p vs SA
TRINITY_DN35_c0_g1_i2	14	35.63	1.9951e-13	0.293522	Upregulated	SA-p vs SA
TRINITY_DN350_c0_g1_i1	1186	1	3.73635e-45	-0.720016	Downregulated	SA-p vs SA
TRINITY_DN350_c0_g2_i1	677	1	1.48044e-31	-0.649094	Downregulated	SA-p vs SA
TRINITY_DN351_c0_g5_i1	1	2640	2.58339e-162	1.17196	Upregulated	SA-p vs SA
TRINITY_DN353_c0_g1_i2	92	1	7.6953e-06	-0.396625	Downregulated	SA-p vs SA
TRINITY_DN3533_c0_g2_i2	1	32629	4.35256e-271	1.49002	Upregulated	SA-p vs SA
TRINITY_DN3533_c1_g1_i1	21	56516	6.22897e-295	1.17439	Upregulated	SA-p vs SA
TRINITY_DN3533_c1_g2_i1	19	8870	1.2264e-214	0.952798	Upregulated	SA-p vs SA
TRINITY_DN3533_c1_g3_i1	6	7173	1.94056e-205	1.07174	Upregulated	SA-p vs SA
TRINITY_DN35673_c0_g1_i1	36	18212	4.23428e-242	0.962958	Upregulated	SA-p vs SA
TRINITY_DN35680_c0_g1_i1	21	7533	1.43297e-207	0.919471	Upregulated	SA-p vs SA
TRINITY_DN35705_c0_g1_i1	43	19258	2.97398e-240	0.947547	Upregulated	SA-p vs SA
TRINITY_DN35711_c0_g1_i1	37	24197	2.03156e-254	0.995436	Upregulated	SA-p vs SA
TRINITY_DN35722_c0_g1_i1	1	411	3.77657e-84	0.936682	Upregulated	SA-p vs SA
TRINITY_DN35798_c0_g1_i1	21	4710	2.74243e-187	0.860068	Upregulated	SA-p vs SA
TRINITY_DN35806_c0_g1_i1	814	2	1.08401e-33	-0.584726	Downregulated	SA-p vs SA
TRINITY_DN35835_c0_g1_i1	151	131	8.10039e-15	0.157387	Upregulated	SA-p vs SA
TRINITY_DN35867_c0_g1_i1	2088	4	1.08542e-57	-0.616205	Downregulated	SA-p vs SA
TRINITY_DN35888_c0_g1_i1	18	10165	1.55022e-220	0.976875	Upregulated	SA-p vs SA
TRINITY_DN35892_c0_g1_i1	1	2512	3.49509e-160	1.16567	Upregulated	SA-p vs SA
TRINITY_DN35896_c0_g1_i1	3	8649	1.56948e-213	1.18309	Upregulated	SA-p vs SA
TRINITY_DN359_c0_g3_i1	29	5998	9.79556e-198	0.849817	Upregulated	SA-p vs SA
TRINITY_DN35901_c0_g1_i1	1	13155	1.08373e-231	1.37511	Upregulated	SA-p vs SA
TRINITY_DN35926_c0_g1_i1	3664	3	4.95503e-78	-0.72373	Downregulated	SA-p vs SA
TRINITY_DN35933_c0_g1_i1	23	1811	2.90807e-146	0.727655	Upregulated	SA-p vs SA
TRINITY_DN35938_c0_g1_i1	1	5653	3.93101e-195	1.26827	Upregulated	SA-p vs SA
TRINITY_DN35971_c0_g1_i1	15	1085	1.77872e-124	0.716921	Upregulated	SA-p vs SA
TRINITY_DN36_c0_g2_i1	5	11726	1.03249e-226	1.15698	Upregulated	SA-p vs SA
TRINITY_DN36_c0_g2_i3	1	9122	7.84583e-216	1.3288	Upregulated	SA-p vs SA
TRINITY_DN36_c0_g3_i1	26	2199	1.46658e-154	0.736702	Upregulated	SA-p vs SA
TRINITY_DN36_c1_g2_i1	15	3015	4.67148e-168	0.846202	Upregulated	SA-p vs SA
TRINITY_DN36_c2_g1_i1	15	13137	1.21733e-231	1.03238	Upregulated	SA-p vs SA
TRINITY_DN360_c0_g2_i1	42	19018	4.96837e-241	0.948937	Upregulated	SA-p vs SA
TRINITY_DN36038_c0_g1_i1	43	1	0.0143062	-0.300414	Downregulated	SA-p vs SA
TRINITY_DN36059_c0_g1_i1	8	4446	9.00235e-185	0.974849	Upregulated	SA-p vs SA
TRINITY_DN36066_c0_g1_i1	2906	5	2.09715e-67	-0.629794	Downregulated	SA-p vs SA
TRINITY_DN36086_c0_g1_i1	4	9451	2.27021e-217	1.15792	Upregulated	SA-p vs SA
TRINITY_DN36108_c0_g1_i1	1432	4	8.90099e-46	-0.5685	Downregulated	SA-p vs SA
TRINITY_DN3614_c0_g1_i1	1	25485	2.28909e-260	1.45876	Upregulated	SA-p vs SA
TRINITY_DN3614_c3_g2_i1	23	256	2.86616e-66	0.480173	Upregulated	SA-p vs SA
TRINITY_DN364_c0_g1_i11	5374.39	5.5	3.25776e-88	-0.695516	Downregulated	SA-p vs SA
TRINITY_DN364_c0_g1_i5	1343.6	5.5	6.39185e-42	-0.520156	Downregulated	SA-p vs SA
TRINITY_DN36438_c0_g1_i1	1	1683	4.94008e-143	1.11501	Upregulated	SA-p vs SA
TRINITY_DN365_c0_g2_i1	31	6846	1.89479e-203	0.858109	Upregulated	SA-p vs SA
TRINITY_DN366_c0_g1_i26	2707.51	23	8.69565e-49	-0.427806	Downregulated	SA-p vs SA
TRINITY_DN36619_c0_g1_i2	1	139	4.6892e-44	0.799546	Upregulated	SA-p vs SA
TRINITY_DN3662_c1_g2_i1	1778.34	1.15	4.22761e-57	-0.75358	Downregulated	SA-p vs SA
TRINITY_DN3662_c1_g2_i3	538.66	3.85	1.23058e-22	-0.449655	Downregulated	SA-p vs SA
TRINITY_DN3662_c2_g1_i1	182	2	1.76111e-09	-0.395242	Downregulated	SA-p vs SA
TRINITY_DN36702_c0_g1_i1	12	2063	8.97631e-152	0.826431	Upregulated	SA-p vs SA
TRINITY_DN3672_c0_g1_i2	324.43	4.4	5.60107e-14	-0.368629	Downregulated	SA-p vs SA
TRINITY_DN3678_c0_g1_i1	315	1	1.25659e-17	-0.552313	Downregulated	SA-p vs SA
TRINITY_DN3678_c0_g2_i1	6056	5	2.20007e-94	-0.722676	Downregulated	SA-p vs SA
TRINITY_DN36836_c0_g1_i1	13	21	3.36881e-07	0.236023	Upregulated	SA-p vs SA
TRINITY_DN36845_c0_g1_i1	2007	2	5.65661e-59	-0.69888	Downregulated	SA-p vs SA
TRINITY_DN369_c1_g2_i1	31	7279	4.24625e-206	0.865866	Upregulated	SA-p vs SA
TRINITY_DN37_c0_g1_i1	71.5	9471.8	1.76289e-197	0.793462	Upregulated	SA-p vs SA
TRINITY_DN37_c0_g2_i3	14.3	35283.1	1.74565e-274	1.1634	Upregulated	SA-p vs SA
TRINITY_DN37_c0_g2_i4	44.4	16288	5.38293e-233	0.922306	Upregulated	SA-p vs SA
TRINITY_DN37_c0_g2_i5	4.8	14378.4	1.50987e-235	1.18794	Upregulated	SA-p vs SA
TRINITY_DN37_c0_g4_i3	1	9601	4.76152e-218	1.33527	Upregulated	SA-p vs SA
TRINITY_DN37_c0_g4_i4	11	5937.59	2.82047e-197	0.971161	Upregulated	SA-p vs SA
TRINITY_DN37_c2_g1_i1	24	12402	3.74029e-229	0.965645	Upregulated	SA-p vs SA
TRINITY_DN370_c0_g1_i2	584.34	1	2.10801e-28	-0.630476	Downregulated	SA-p vs SA
TRINITY_DN371_c0_g1_i1	1896.63	10	7.04264e-48	-0.488139	Downregulated	SA-p vs SA
TRINITY_DN37183_c0_g1_i1	171	1	4.8108e-10	-0.475036	Downregulated	SA-p vs SA
TRINITY_DN372_c0_g1_i1	3053	1	1.4659e-74	-0.839622	Downregulated	SA-p vs SA
TRINITY_DN3721_c0_g1_i2	1	335	5.08366e-76	0.910819	Upregulated	SA-p vs SA
TRINITY_DN373_c0_g2_i1	2000.14	2.87	8.7691e-58	-0.652761	Downregulated	SA-p vs SA
TRINITY_DN373_c0_g2_i2	175.49	0.13	4.20921e-13	-0.736392	Downregulated	SA-p vs SA
TRINITY_DN373_c0_g3_i1	429	1	1.32618e-22	-0.591385	Downregulated	SA-p vs SA
TRINITY_DN3738_c0_g2_i1	252	3	3.92493e-12	-0.385117	Downregulated	SA-p vs SA
TRINITY_DN374_c0_g1_i1	110.86	2.45	9.36946e-06	-0.306863	Downregulated	SA-p vs SA
TRINITY_DN374_c0_g1_i2	4177.14	6.55	1.41667e-77	-0.641536	Downregulated	SA-p vs SA
TRINITY_DN374_c0_g2_i1	225	1	3.24358e-13	-0.509751	Downregulated	SA-p vs SA
TRINITY_DN3753_c0_g1_i1	274	1	1.03889e-15	-0.534674	Downregulated	SA-p vs SA
TRINITY_DN3776_c0_g1_i1	7	19113	6.86332e-248	1.17622	Upregulated	SA-p vs SA
TRINITY_DN378_c0_g1_i5	2	12424.1	3.23806e-229	1.2802	Upregulated	SA-p vs SA
TRINITY_DN378_c0_g2_i10	13	433.47	1.85842e-86	0.618962	Upregulated	SA-p vs SA
TRINITY_DN378_c2_g1_i1	8	13071	2.03354e-231	1.11126	Upregulated	SA-p vs SA
TRINITY_DN3816_c0_g1_i1	102	1	2.86969e-06	-0.409677	Downregulated	SA-p vs SA
TRINITY_DN383_c0_g2_i3	142.47	1	2.46256e-08	-0.451947	Downregulated	SA-p vs SA
TRINITY_DN384_c0_g2_i1	18	57111	2.1897e-295	1.19521	Upregulated	SA-p vs SA
TRINITY_DN3871_c0_g2_i6	1586.76	3.85	4.98259e-49	-0.586316	Downregulated	SA-p vs SA
TRINITY_DN3875_c0_g1_i6	2405.15	4	3.97606e-62	-0.634092	Downregulated	SA-p vs SA
TRINITY_DN388_c0_g1_i1	6096.2	4	1.13469e-95	-0.75174	Downregulated	SA-p vs SA
TRINITY_DN3882_c0_g2_i1	4532.7	1	5.2166e-89	-0.889612	Downregulated	SA-p vs SA
TRINITY_DN3882_c0_g2_i3	395.3	1	7.77611e-21	-0.581037	Downregulated	SA-p vs SA
TRINITY_DN3888_c0_g1_i1	90	132	4.02036e-23	0.223806	Upregulated	SA-p vs SA
TRINITY_DN389_c0_g1_i1	2657	1	4.79454e-70	-0.822049	Downregulated	SA-p vs SA
TRINITY_DN3890_c1_g1_i5	8488.48	2.79	4.82443e-110	-0.839185	Downregulated	SA-p vs SA
TRINITY_DN3890_c1_g1_i6	53.64	1.21	0.00188767	-0.304269	Downregulated	SA-p vs SA
TRINITY_DN39_c1_g1_i6	15440.1	1	4.69941e-137	-1.04465	Downregulated	SA-p vs SA
TRINITY_DN391_c0_g3_i1	28351	20	1.49268e-142	-0.742576	Downregulated	SA-p vs SA
TRINITY_DN391_c2_g1_i1	148	1	8.3061e-09	-0.456764	Downregulated	SA-p vs SA
TRINITY_DN392_c0_g1_i1	268	2	7.18505e-14	-0.444194	Downregulated	SA-p vs SA
TRINITY_DN3923_c0_g1_i2	15	85	1.58075e-31	0.394778	Upregulated	SA-p vs SA
TRINITY_DN395_c0_g1_i2	106.29	177.49	1.00197e-28	0.240219	Upregulated	SA-p vs SA
TRINITY_DN395_c0_g1_i3	126.71	190.51	1.75501e-27	0.226945	Upregulated	SA-p vs SA
TRINITY_DN3957_c0_g2_i1	44	66	4.06325e-16	0.226649	Upregulated	SA-p vs SA
TRINITY_DN3974_c0_g2_i1	10	6364	2.8871e-200	0.99199	Upregulated	SA-p vs SA
TRINITY_DN3988_c0_g1_i1	234	6	1.16634e-08	-0.288063	Downregulated	SA-p vs SA
TRINITY_DN399_c0_g1_i1	1506	4	2.45094e-47	-0.574873	Downregulated	SA-p vs SA
TRINITY_DN3991_c0_g1_i10	159.04	2	2.66661e-08	-0.378184	Downregulated	SA-p vs SA
TRINITY_DN3991_c0_g1_i4	339.69	1	1.88102e-18	-0.561858	Downregulated	SA-p vs SA
TRINITY_DN40_c0_g5_i4	17	11847	3.64691e-227	1.00347	Upregulated	SA-p vs SA
TRINITY_DN400_c0_g1_i1	15146	7	2.34348e-128	-0.79607	Downregulated	SA-p vs SA
TRINITY_DN4011_c0_g1_i1	318	1	9.42972e-18	-0.553512	Downregulated	SA-p vs SA
TRINITY_DN402_c0_g1_i4	81531	278	4.89903e-113	-0.543274	Downregulated	SA-p vs SA
TRINITY_DN40579_c0_g1_i1	5	3036	2.48737e-168	0.986049	Upregulated	SA-p vs SA
TRINITY_DN406_c0_g1_i1	141	1	8.6025e-09	-0.450635	Downregulated	SA-p vs SA
TRINITY_DN406_c2_g3_i1	6	85	1.20269e-30	0.510684	Upregulated	SA-p vs SA
TRINITY_DN406_c3_g1_i1	18	4171	4.832e-182	0.864194	Upregulated	SA-p vs SA
TRINITY_DN40613_c0_g1_i1	3	2871	6.38898e-166	1.0436	Upregulated	SA-p vs SA
TRINITY_DN40614_c0_g1_i1	1	17597	2.64729e-244	1.41191	Upregulated	SA-p vs SA
TRINITY_DN40701_c0_g1_i1	88	10408	3.05961e-196	0.77912	Upregulated	SA-p vs SA
TRINITY_DN40710_c0_g1_i1	38.73	1	0.0153481	-0.287184	Downregulated	SA-p vs SA
TRINITY_DN40727_c0_g1_i1	1131	7	5.45087e-36	-0.467862	Downregulated	SA-p vs SA
TRINITY_DN40729_c0_g1_i1	17	5146	4.23355e-191	0.897996	Upregulated	SA-p vs SA
TRINITY_DN40759_c0_g1_i1	12	8569	3.88661e-213	1.00656	Upregulated	SA-p vs SA
TRINITY_DN40760_c0_g1_i1	16	583	1.42221e-98	0.630185	Upregulated	SA-p vs SA
TRINITY_DN40767_c0_g1_i1	1	13008	3.32692e-231	1.37369	Upregulated	SA-p vs SA
TRINITY_DN40774_c0_g1_i1	34	8099	1.0214e-208	0.867685	Upregulated	SA-p vs SA
TRINITY_DN40776_c0_g1_i1	8	5695	1.83889e-195	1.00617	Upregulated	SA-p vs SA
TRINITY_DN40784_c0_g1_i1	4	14606	3.14071e-236	1.21299	Upregulated	SA-p vs SA
TRINITY_DN40808_c0_g1_i1	1	4550	9.19397e-186	1.24081	Upregulated	SA-p vs SA
TRINITY_DN40848_c0_g1_i1	1914	5	2.86419e-53	-0.576972	Downregulated	SA-p vs SA
TRINITY_DN4086_c0_g2_i2	174	1	3.39816e-10	-0.477236	Downregulated	SA-p vs SA
TRINITY_DN4086_c0_g4_i1	625	1	1.45292e-29	-0.638985	Downregulated	SA-p vs SA
TRINITY_DN4087_c0_g1_i1	1304.06	7	9.17211e-40	-0.485872	Downregulated	SA-p vs SA
TRINITY_DN4087_c0_g2_i1	12392.7	1	7.09719e-128	-1.01684	Downregulated	SA-p vs SA
TRINITY_DN40879_c0_g1_i1	505	1	1.3518e-25	-0.612017	Downregulated	SA-p vs SA
TRINITY_DN40931_c0_g1_i1	9806	4	2.42172e-114	-0.811866	Downregulated	SA-p vs SA
TRINITY_DN4098_c0_g1_i1	4125	1	2.32161e-85	-0.87769	Downregulated	SA-p vs SA
TRINITY_DN41_c0_g2_i5	170.07	1	6.81463e-10	-0.474346	Downregulated	SA-p vs SA
TRINITY_DN4107_c1_g2_i1	1036	1	1.27259e-41	-0.702912	Downregulated	SA-p vs SA
TRINITY_DN411_c0_g2_i1	9	2214	8.6498e-155	0.871757	Upregulated	SA-p vs SA
TRINITY_DN411_c1_g2_i1	16	53	2.89372e-20	0.326863	Upregulated	SA-p vs SA
TRINITY_DN411_c1_g4_i1	18	68000	5.82316e-303	1.21729	Upregulated	SA-p vs SA
TRINITY_DN41495_c0_g1_i1	10	25	3.00325e-10	0.291266	Upregulated	SA-p vs SA
TRINITY_DN415_c0_g1_i1	2	17696	1.50908e-244	1.32494	Upregulated	SA-p vs SA
TRINITY_DN41793_c0_g1_i1	2075	3	1.59617e-58	-0.651806	Downregulated	SA-p vs SA
TRINITY_DN420_c0_g2_i1	1993.53	1.74	9.6986e-59	-0.715644	Downregulated	SA-p vs SA
TRINITY_DN420_c0_g2_i4	1094.47	1.26	2.9012e-43	-0.680622	Downregulated	SA-p vs SA
TRINITY_DN4202_c0_g3_i1	31	26980	7.54421e-263	1.03159	Upregulated	SA-p vs SA
TRINITY_DN42072_c0_g1_i1	15	139	6.45476e-45	0.456991	Upregulated	SA-p vs SA
TRINITY_DN42109_c0_g1_i1	1	847	6.24947e-114	1.02815	Upregulated	SA-p vs SA
TRINITY_DN4217_c0_g1_i1	3173	6	3.42444e-69	-0.61785	Downregulated	SA-p vs SA
TRINITY_DN4227_c0_g1_i4	3232	3	6.91597e-74	-0.707861	Downregulated	SA-p vs SA
TRINITY_DN4227_c1_g1_i1	132	1	3.82351e-08	-0.442291	Downregulated	SA-p vs SA
TRINITY_DN423_c0_g1_i2	543.1	2	3.86175e-25	-0.533538	Downregulated	SA-p vs SA
TRINITY_DN42311_c0_g1_i1	5	3095	3.6859e-169	0.988484	Upregulated	SA-p vs SA
TRINITY_DN4236_c0_g1_i1	981	2	2.07368e-38	-0.608332	Downregulated	SA-p vs SA
TRINITY_DN42389_c0_g1_i1	20	24	1.33121e-06	0.198422	Upregulated	SA-p vs SA
TRINITY_DN424_c0_g1_i1	2843.71	3	3.61578e-69	-0.69167	Downregulated	SA-p vs SA
TRINITY_DN425_c0_g1_i3	565.03	1.5	4.54645e-26	-0.574936	Downregulated	SA-p vs SA
TRINITY_DN425_c0_g1_i7	535.74	1.5	7.39724e-25	-0.568202	Downregulated	SA-p vs SA
TRINITY_DN4254_c0_g1_i1	176.22	0.78	2.40176e-10	-0.510269	Downregulated	SA-p vs SA
TRINITY_DN4254_c0_g1_i2	4600.9	0.22	2.03601e-91	-1.08303	Downregulated	SA-p vs SA
TRINITY_DN4273_c0_g1_i1	8164.35	2.37	4.01296e-110	-0.854898	Downregulated	SA-p vs SA
TRINITY_DN4273_c0_g1_i2	4545.65	6.63	8.36744e-81	-0.650695	Downregulated	SA-p vs SA
TRINITY_DN428_c0_g1_i1	553	1	4.32752e-27	-0.623503	Downregulated	SA-p vs SA
TRINITY_DN429_c0_g2_i3	1874.2	3	1.49614e-55	-0.638931	Downregulated	SA-p vs SA
TRINITY_DN43_c0_g1_i17	46	26733.7	3.14499e-253	0.980506	Upregulated	SA-p vs SA
TRINITY_DN43_c0_g3_i2	55	53440.6	7.67574e-279	1.04552	Upregulated	SA-p vs SA
TRINITY_DN4327_c0_g3_i1	2801	1	5.78993e-72	-0.828725	Downregulated	SA-p vs SA
TRINITY_DN433_c0_g1_i1	19	23124.6	3.7034e-256	1.07401	Upregulated	SA-p vs SA
TRINITY_DN4351_c0_g1_i1	6035	4	2.86886e-95	-0.750463	Downregulated	SA-p vs SA
TRINITY_DN4351_c0_g2_i1	518	3	4.76782e-23	-0.476263	Downregulated	SA-p vs SA
TRINITY_DN4370_c0_g1_i1	1490	2	4.41982e-50	-0.661202	Downregulated	SA-p vs SA
TRINITY_DN439_c0_g2_i3	1000.71	3.67	5.73046e-36	-0.53406	Downregulated	SA-p vs SA
TRINITY_DN439_c0_g2_i6	3993.99	3.67	9.77282e-80	-0.70914	Downregulated	SA-p vs SA
TRINITY_DN439_c0_g2_i7	588.02	3.67	3.71254e-24	-0.466802	Downregulated	SA-p vs SA
TRINITY_DN44_c0_g1_i2	0.21	18778.9	4.01597e-247	1.61755	Upregulated	SA-p vs SA
TRINITY_DN44_c0_g1_i5	43.28	4598.9	2.4644e-178	0.765571	Upregulated	SA-p vs SA
TRINITY_DN44_c0_g1_i6	5.74	24815.2	3.25903e-259	1.23435	Upregulated	SA-p vs SA
TRINITY_DN44_c0_g5_i1	1	8595	2.95386e-213	1.32127	Upregulated	SA-p vs SA
TRINITY_DN44_c1_g2_i1	5	10191	1.23515e-220	1.13923	Upregulated	SA-p vs SA
TRINITY_DN443_c0_g5_i2	15	4874.74	9.21575e-189	0.906979	Upregulated	SA-p vs SA
TRINITY_DN444_c0_g1_i1	187	1	4.27624e-11	-0.48635	Downregulated	SA-p vs SA
TRINITY_DN445_c0_g1_i1	62814	39	2.71763e-163	-0.758728	Downregulated	SA-p vs SA
TRINITY_DN4459_c0_g1_i1	4106	39	1.99989e-53	-0.413683	Downregulated	SA-p vs SA
TRINITY_DN4497_c0_g2_i3	1697.96	42	1.23637e-25	-0.292611	Downregulated	SA-p vs SA
TRINITY_DN4497_c0_g3_i1	424	1	2.81406e-22	-0.589902	Downregulated	SA-p vs SA
TRINITY_DN45_c0_g1_i12	10946.9	6.19	2.39776e-116	-0.770556	Downregulated	SA-p vs SA
TRINITY_DN45_c0_g1_i15	1.33	839.88	1.39472e-113	0.99101	Upregulated	SA-p vs SA
TRINITY_DN45_c0_g1_i19	1319.87	6.19	2.097e-41	-0.502952	Downregulated	SA-p vs SA
TRINITY_DN45_c0_g1_i2	4.67	12614.1	7.10233e-230	1.17485	Upregulated	SA-p vs SA
TRINITY_DN45_c0_g1_i5	6	1126.29	5.76585e-126	0.837552	Upregulated	SA-p vs SA
TRINITY_DN4504_c0_g1_i1	2899	1	3.16464e-73	-0.833075	Downregulated	SA-p vs SA
TRINITY_DN4504_c0_g2_i2	324	1	4.00107e-18	-0.555877	Downregulated	SA-p vs SA
TRINITY_DN4511_c0_g1_i1	221	3	1.32894e-10	-0.368513	Downregulated	SA-p vs SA
TRINITY_DN4517_c0_g1_i1	1363	34	1.58577e-23	-0.291545	Downregulated	SA-p vs SA
TRINITY_DN4517_c0_g2_i1	12207	14	1.51562e-112	-0.681102	Downregulated	SA-p vs SA
TRINITY_DN452_c0_g2_i1	507	1	1.074e-25	-0.612517	Downregulated	SA-p vs SA
TRINITY_DN452_c0_g2_i2	274	1	1.03889e-15	-0.534674	Downregulated	SA-p vs SA
TRINITY_DN45300_c0_g1_i1	1	6230	2.46519e-199	1.28056	Upregulated	SA-p vs SA
TRINITY_DN45330_c0_g1_i1	1	21918	7.94752e-254	1.43969	Upregulated	SA-p vs SA
TRINITY_DN45342_c0_g1_i1	50	6216	8.80646e-188	0.785428	Upregulated	SA-p vs SA
TRINITY_DN4535_c0_g4_i1	1	1136	2.61091e-126	1.06529	Upregulated	SA-p vs SA
TRINITY_DN45367_c0_g1_i1	1	4082	4.40906e-181	1.22708	Upregulated	SA-p vs SA
TRINITY_DN45391_c0_g1_i1	1	15006	2.13077e-237	1.39176	Upregulated	SA-p vs SA
TRINITY_DN45393_c0_g1_i1	8	19880	1.34912e-249	1.1643	Upregulated	SA-p vs SA
TRINITY_DN454_c0_g2_i1	17	11328	3.17906e-225	0.997808	Upregulated	SA-p vs SA
TRINITY_DN454_c0_g8_i1	2	1623	1.74667e-141	1.02274	Upregulated	SA-p vs SA
TRINITY_DN454_c0_g9_i1	2	11821	4.63504e-227	1.2739	Upregulated	SA-p vs SA
TRINITY_DN45420_c0_g1_i1	19	8993	3.11026e-215	0.95454	Upregulated	SA-p vs SA
TRINITY_DN45429_c0_g1_i1	20	2209	9.72427e-155	0.770464	Upregulated	SA-p vs SA
TRINITY_DN45472_c0_g1_i1	6553	4	1.51971e-98	-0.76088	Downregulated	SA-p vs SA
TRINITY_DN45474_c0_g1_i1	6	6617	6.00253e-202	1.06154	Upregulated	SA-p vs SA
TRINITY_DN456_c0_g2_i1	30	8879	1.08465e-214	0.895148	Upregulated	SA-p vs SA
TRINITY_DN45669_c0_g1_i1	1	4706	3.23843e-187	1.24508	Upregulated	SA-p vs SA
TRINITY_DN45693_c0_g1_i1	17	1809	3.51677e-146	0.765752	Upregulated	SA-p vs SA
TRINITY_DN45700_c0_g1_i1	24	953	4.41258e-119	0.641059	Upregulated	SA-p vs SA
TRINITY_DN45714_c0_g1_i1	1	1326	7.17286e-133	1.08485	Upregulated	SA-p vs SA
TRINITY_DN45739_c0_g1_i1	18	4729	1.86267e-187	0.880076	Upregulated	SA-p vs SA
TRINITY_DN458_c0_g9_i1	16	9474.42	1.73757e-217	0.982874	Upregulated	SA-p vs SA
TRINITY_DN45800_c0_g1_i1	1	447	1.65735e-87	0.947303	Upregulated	SA-p vs SA
TRINITY_DN45859_c0_g1_i1	23	7455	4.01065e-207	0.906646	Upregulated	SA-p vs SA
TRINITY_DN46011_c0_g1_i1	2100	15	1.66383e-46	-0.449734	Downregulated	SA-p vs SA
TRINITY_DN4605_c1_g2_i2	47.62	0.42	0.000206996	-0.423058	Downregulated	SA-p vs SA
TRINITY_DN4605_c1_g2_i5	4454.93	2.58	5.60003e-85	-0.767533	Downregulated	SA-p vs SA
TRINITY_DN461_c0_g1_i11	225.36	3	1.76173e-10	-0.370984	Downregulated	SA-p vs SA
TRINITY_DN461_c0_g1_i9	104.42	2	1.72368e-05	-0.324964	Downregulated	SA-p vs SA
TRINITY_DN46124_c0_g1_i1	158	2	2.66661e-08	-0.377355	Downregulated	SA-p vs SA
TRINITY_DN46144_c0_g1_i1	126	1	1.17539e-07	-0.436407	Downregulated	SA-p vs SA
TRINITY_DN46229_c0_g1_i1	1993	4	4.30289e-56	-0.610315	Downregulated	SA-p vs SA
TRINITY_DN46413_c0_g1_i1	316	1	1.25659e-17	-0.552714	Downregulated	SA-p vs SA
TRINITY_DN465_c0_g3_i1	164	7	3.7881e-05	-0.223601	Downregulated	SA-p vs SA
TRINITY_DN47_c0_g1_i1	199	4	1.36711e-08	-0.318858	Downregulated	SA-p vs SA
TRINITY_DN4716_c1_g3_i1	19	104832	0	1.2652	Upregulated	SA-p vs SA
TRINITY_DN472_c1_g2_i1	63	1	0.00057344	-0.348727	Downregulated	SA-p vs SA
TRINITY_DN472_c1_g2_i2	5835	1	2.36963e-98	-0.92156	Downregulated	SA-p vs SA
TRINITY_DN4728_c0_g1_i1	3	34	3.27725e-14	0.482458	Upregulated	SA-p vs SA
TRINITY_DN474_c0_g1_i5	210	2	7.13952e-11	-0.413344	Downregulated	SA-p vs SA
TRINITY_DN47490_c0_g1_i1	1	1034	2.48967e-122	1.05339	Upregulated	SA-p vs SA
TRINITY_DN477_c0_g1_i2	5964.39	5.17	8.77821e-94	-0.716519	Downregulated	SA-p vs SA
TRINITY_DN477_c0_g1_i4	14870.1	13.31	1.72218e-121	-0.712459	Downregulated	SA-p vs SA
TRINITY_DN477_c0_g1_i5	12818	12.52	2.3769e-115	-0.701414	Downregulated	SA-p vs SA
TRINITY_DN4773_c0_g1_i1	11	13	0.000339552	0.196491	Upregulated	SA-p vs SA
TRINITY_DN478_c0_g2_i1	1015	2	2.18805e-39	-0.612642	Downregulated	SA-p vs SA
TRINITY_DN47939_c0_g1_i1	262	2	1.74139e-13	-0.441329	Downregulated	SA-p vs SA
TRINITY_DN48_c0_g2_i1	1	8370	4.15246e-212	1.31792	Upregulated	SA-p vs SA
TRINITY_DN48_c0_g4_i1	2	36514	5.70716e-276	1.41657	Upregulated	SA-p vs SA
TRINITY_DN486_c0_g2_i4	1574	1	1.29107e-53	-0.755819	Downregulated	SA-p vs SA
TRINITY_DN4868_c0_g1_i1	4082	10	1.15768e-73	-0.585099	Downregulated	SA-p vs SA
TRINITY_DN4868_c0_g2_i1	163	1	6.69328e-10	-0.468975	Downregulated	SA-p vs SA
TRINITY_DN487_c0_g3_i1	346	1	8.21654e-19	-0.564187	Downregulated	SA-p vs SA
TRINITY_DN4874_c2_g1_i7	3807.43	7	1.52617e-74	-0.621408	Downregulated	SA-p vs SA
TRINITY_DN4874_c2_g2_i1	241	1	1.08239e-13	-0.518441	Downregulated	SA-p vs SA
TRINITY_DN4874_c4_g1_i1	133	1	3.82351e-08	-0.443246	Downregulated	SA-p vs SA
TRINITY_DN489_c0_g1_i2	1385	1	1.95265e-49	-0.739638	Downregulated	SA-p vs SA
TRINITY_DN4918_c0_g1_i2	14	3194	1.54636e-170	0.862225	Upregulated	SA-p vs SA
TRINITY_DN4918_c0_g3_i1	29	17457	5.68999e-244	0.984954	Upregulated	SA-p vs SA
TRINITY_DN4933_c0_g1_i1	11	4469	5.26512e-185	0.935219	Upregulated	SA-p vs SA
TRINITY_DN497_c0_g2_i1	19	5482	7.79234e-194	0.891928	Upregulated	SA-p vs SA
TRINITY_DN5_c0_g1_i21	10	47799.4	1.16803e-287	1.24705	Upregulated	SA-p vs SA
TRINITY_DN5_c0_g1_i37	20.58	17359.5	1.00824e-243	1.02763	Upregulated	SA-p vs SA
TRINITY_DN5_c0_g2_i2	24	35803.9	4.01361e-275	1.09976	Upregulated	SA-p vs SA
TRINITY_DN50_c0_g1_i2	3414.6	13.66	1.37002e-63	-0.523064	Downregulated	SA-p vs SA
TRINITY_DN50_c0_g1_i7	15530.6	18.34	9.55532e-119	-0.677406	Downregulated	SA-p vs SA
TRINITY_DN50022_c0_g1_i1	1	1652	3.08557e-142	1.11266	Upregulated	SA-p vs SA
TRINITY_DN50023_c0_g1_i1	12	2066	7.75513e-152	0.826615	Upregulated	SA-p vs SA
TRINITY_DN50031_c0_g1_i1	9	4276	4.26353e-183	0.955019	Upregulated	SA-p vs SA
TRINITY_DN50074_c0_g1_i1	1	18649	8.03457e-247	1.41926	Upregulated	SA-p vs SA
TRINITY_DN50086_c0_g1_i1	8	7519.58	1.75493e-207	1.04132	Upregulated	SA-p vs SA
TRINITY_DN50100_c0_g1_i1	79	55046	2.46693e-271	1.00346	Upregulated	SA-p vs SA
TRINITY_DN50114_c0_g1_i1	1	204	3.53629e-57	0.848076	Upregulated	SA-p vs SA
TRINITY_DN5012_c0_g1_i1	13	174	3.67186e-52	0.503501	Upregulated	SA-p vs SA
TRINITY_DN50169_c0_g1_i1	7	940	2.31097e-118	0.795182	Upregulated	SA-p vs SA
TRINITY_DN50198_c0_g1_i1	1	2427	1.04608e-158	1.16131	Upregulated	SA-p vs SA
TRINITY_DN5021_c0_g1_i1	2	13227	6.25548e-232	1.28812	Upregulated	SA-p vs SA
TRINITY_DN50253_c0_g1_i1	1	914	3.94579e-117	1.03778	Upregulated	SA-p vs SA
TRINITY_DN50264_c0_g1_i1	15	13676	2.20114e-233	1.03747	Upregulated	SA-p vs SA
TRINITY_DN50282_c0_g1_i1	1	3187	2.05712e-170	1.19577	Upregulated	SA-p vs SA
TRINITY_DN50284_c0_g1_i1	1	5666	3.12072e-195	1.26856	Upregulated	SA-p vs SA
TRINITY_DN5029_c0_g2_i1	983.17	2	1.78224e-38	-0.608611	Downregulated	SA-p vs SA
TRINITY_DN50328_c0_g1_i1	1	3516	1.20598e-174	1.2082	Upregulated	SA-p vs SA
TRINITY_DN50366_c0_g1_i1	1	6765	6.77319e-203	1.29099	Upregulated	SA-p vs SA
TRINITY_DN50483_c0_g1_i1	21	5132	5.45725e-191	0.870922	Upregulated	SA-p vs SA
TRINITY_DN505_c0_g1_i1	12	8046	2.06232e-210	0.998593	Upregulated	SA-p vs SA
TRINITY_DN50535_c0_g1_i1	13	15502	8.16614e-239	1.07142	Upregulated	SA-p vs SA
TRINITY_DN50598_c0_g1_i1	1	1958	1.6864e-149	1.13415	Upregulated	SA-p vs SA
TRINITY_DN5082_c0_g1_i1	510	1	8.53705e-26	-0.613263	Downregulated	SA-p vs SA
TRINITY_DN50863_c0_g1_i1	659	4	2.0679e-26	-0.470326	Downregulated	SA-p vs SA
TRINITY_DN50980_c0_g1_i1	14	20	3.85312e-06	0.220477	Upregulated	SA-p vs SA
TRINITY_DN51_c0_g1_i3	1	643.99	1.67796e-102	0.99349	Upregulated	SA-p vs SA
TRINITY_DN510_c0_g2_i1	357.03	3	1.46167e-16	-0.429187	Downregulated	SA-p vs SA
TRINITY_DN51044_c0_g1_i1	2556	1	1.18082e-68	-0.817147	Downregulated	SA-p vs SA
TRINITY_DN51120_c0_g1_i1	2	1756	7.54964e-145	1.0327	Upregulated	SA-p vs SA
TRINITY_DN51208_c0_g1_i1	21	140	1.4964e-45	0.415336	Upregulated	SA-p vs SA
TRINITY_DN51379_c0_g1_i1	107	1	1.32245e-06	-0.415731	Downregulated	SA-p vs SA
TRINITY_DN514_c0_g1_i1	18	11031	4.46751e-224	0.987217	Upregulated	SA-p vs SA
TRINITY_DN5148_c0_g1_i1	11	31224	3.5092e-269	1.18113	Upregulated	SA-p vs SA
TRINITY_DN515_c0_g2_i2	352.72	1	3.60962e-19	-0.56662	Downregulated	SA-p vs SA
TRINITY_DN5153_c0_g1_i1	353	380	4.16097e-25	0.184683	Upregulated	SA-p vs SA
TRINITY_DN5153_c0_g2_i1	276	388	1.66748e-31	0.218444	Upregulated	SA-p vs SA
TRINITY_DN516_c0_g2_i2	1459.13	1	3.99014e-51	-0.746233	Downregulated	SA-p vs SA
TRINITY_DN517_c0_g1_i2	11.36	15.9	2.84737e-05	0.21789	Upregulated	SA-p vs SA
TRINITY_DN517_c0_g1_i3	264.64	418.9	4.07398e-35	0.233454	Upregulated	SA-p vs SA
TRINITY_DN519_c0_g2_i1	421	1	3.62018e-22	-0.589004	Downregulated	SA-p vs SA
TRINITY_DN52_c0_g1_i1	35	70356.7	1.9416e-302	1.13748	Upregulated	SA-p vs SA
TRINITY_DN52_c0_g2_i11	15832	23.87	7.73284e-115	-0.646501	Downregulated	SA-p vs SA
TRINITY_DN52_c0_g2_i6	62	19469.4	3.84755e-232	0.902639	Upregulated	SA-p vs SA
TRINITY_DN52_c0_g2_i7	3.55059e+06	7491.08	2.11744e-138	-0.603997	Downregulated	SA-p vs SA
TRINITY_DN5202_c2_g1_i1	8	4734	1.76274e-187	0.982789	Upregulated	SA-p vs SA
TRINITY_DN52021_c0_g1_i1	1	995	1.04204e-120	1.04852	Upregulated	SA-p vs SA
TRINITY_DN5209_c0_g1_i1	75	1	0.000184687	-0.370782	Downregulated	SA-p vs SA
TRINITY_DN5227_c0_g2_i1	378	1	1.85602e-20	-0.575376	Downregulated	SA-p vs SA
TRINITY_DN523_c0_g1_i1	4058.49	1	1.01938e-84	-0.875634	Downregulated	SA-p vs SA
TRINITY_DN524_c0_g2_i6	169.36	3	9.21502e-08	-0.334848	Downregulated	SA-p vs SA
TRINITY_DN524_c0_g2_i7	44.1	1	0.00962572	-0.303609	Downregulated	SA-p vs SA
TRINITY_DN52407_c0_g1_i1	131	1	5.55759e-08	-0.441329	Downregulated	SA-p vs SA
TRINITY_DN526_c0_g1_i1	4	3775	1.02957e-177	1.04183	Upregulated	SA-p vs SA
TRINITY_DN526_c0_g5_i1	39	15323	4.42297e-233	0.930984	Upregulated	SA-p vs SA
TRINITY_DN5269_c1_g1_i1	1254.85	13	1.97867e-33	-0.402701	Downregulated	SA-p vs SA
TRINITY_DN5271_c0_g1_i2	750	1	1.06662e-33	-0.662048	Downregulated	SA-p vs SA
TRINITY_DN5271_c0_g2_i1	107	2	1.8943e-05	-0.328051	Downregulated	SA-p vs SA
TRINITY_DN5271_c0_g5_i1	179	1	1.69856e-10	-0.48082	Downregulated	SA-p vs SA
TRINITY_DN528_c0_g2_i2	1989.28	11	2.93107e-48	-0.482116	Downregulated	SA-p vs SA
TRINITY_DN531_c0_g1_i1	19	7385	1.03845e-206	0.929621	Upregulated	SA-p vs SA
TRINITY_DN5311_c0_g1_i1	303	1	7.13718e-17	-0.5474	Downregulated	SA-p vs SA
TRINITY_DN54_c0_g2_i1	1353.24	4.99	4.49302e-43	-0.53337	Downregulated	SA-p vs SA
TRINITY_DN54_c0_g2_i3	22971.8	2.01	4.44862e-152	-1.0066	Downregulated	SA-p vs SA
TRINITY_DN541_c0_g1_i2	22	23392	1.17272e-256	1.05692	Upregulated	SA-p vs SA
TRINITY_DN5440_c0_g2_i2	145.34	0.05	2.35366e-11	-0.833413	Downregulated	SA-p vs SA
TRINITY_DN5440_c0_g2_i7	1788.17	1.95	1.4326e-55	-0.687479	Downregulated	SA-p vs SA
TRINITY_DN545_c0_g1_i11	639	5.25	8.00601e-25	-0.432029	Downregulated	SA-p vs SA
TRINITY_DN5487_c1_g1_i2	150.06	1	5.78702e-09	-0.458512	Downregulated	SA-p vs SA
TRINITY_DN5493_c0_g1_i1	23	25	1.79919e-06	0.185907	Upregulated	SA-p vs SA
TRINITY_DN55_c0_g1_i2	439.71	588.18	1.66712e-32	0.212159	Upregulated	SA-p vs SA
TRINITY_DN55_c0_g1_i3	24.11	20.78	5.64529e-05	0.156558	Upregulated	SA-p vs SA
TRINITY_DN55_c0_g1_i6	81.18	98.04	2.79727e-17	0.19923	Upregulated	SA-p vs SA
TRINITY_DN5523_c0_g1_i3	900	4	1.79752e-33	-0.509751	Downregulated	SA-p vs SA
TRINITY_DN5548_c0_g2_i1	22	7587	7.01165e-208	0.91449	Upregulated	SA-p vs SA
TRINITY_DN558_c0_g3_i1	6809	4	4.48792e-100	-0.765727	Downregulated	SA-p vs SA
TRINITY_DN56_c0_g3_i1	1	6324	5.54333e-200	1.28246	Upregulated	SA-p vs SA
TRINITY_DN56_c0_g4_i1	35	11192	1.03089e-222	0.904934	Upregulated	SA-p vs SA
TRINITY_DN56_c2_g1_i1	12	948	9.4105e-119	0.728073	Upregulated	SA-p vs SA
TRINITY_DN56_c3_g2_i1	1	28481	3.44969e-265	1.47282	Upregulated	SA-p vs SA
TRINITY_DN560_c0_g1_i3	299.81	1	9.55611e-17	-0.546061	Downregulated	SA-p vs SA
TRINITY_DN5652_c0_g3_i1	153	2	7.30664e-08	-0.373287	Downregulated	SA-p vs SA
TRINITY_DN5661_c0_g1_i1	144	2	1.17136e-07	-0.365618	Downregulated	SA-p vs SA
TRINITY_DN568_c1_g1_i1	7215	3	1.84592e-103	-0.809444	Downregulated	SA-p vs SA
TRINITY_DN5688_c0_g1_i1	27.76	46.62	1.96093e-13	0.240939	Upregulated	SA-p vs SA
TRINITY_DN57_c0_g1_i3	36.59	10960.4	4.20661e-220	0.896669	Upregulated	SA-p vs SA
TRINITY_DN57_c0_g1_i4	0.41	8653.4	1.50743e-213	1.43491	Upregulated	SA-p vs SA
TRINITY_DN570_c0_g2_i1	61	1	0.000857787	-0.344646	Downregulated	SA-p vs SA
TRINITY_DN5725_c0_g1_i1	568	1	9.45035e-28	-0.626888	Downregulated	SA-p vs SA
TRINITY_DN5729_c0_g2_i1	663	1	4.80554e-31	-0.646451	Downregulated	SA-p vs SA
TRINITY_DN5777_c0_g1_i1	3663.2	10	1.19241e-69	-0.571406	Downregulated	SA-p vs SA
TRINITY_DN5777_c1_g1_i1	1630.71	3	1.85116e-51	-0.621327	Downregulated	SA-p vs SA
TRINITY_DN584_c0_g1_i1	1071.27	5	1.5766e-36	-0.503561	Downregulated	SA-p vs SA
TRINITY_DN5848_c0_g1_i1	75	4	0.00931543	-0.195422	Downregulated	SA-p vs SA
TRINITY_DN5849_c0_g1_i1	25	4501	2.44896e-185	0.832271	Upregulated	SA-p vs SA
TRINITY_DN586_c0_g2_i1	284.83	2	1.97725e-14	-0.451898	Downregulated	SA-p vs SA
TRINITY_DN586_c0_g3_i1	409	1	1.66062e-21	-0.585346	Downregulated	SA-p vs SA
TRINITY_DN587_c0_g2_i1	292	1	3.09211e-16	-0.542722	Downregulated	SA-p vs SA
TRINITY_DN587_c0_g3_i1	403	1	2.77182e-21	-0.583477	Downregulated	SA-p vs SA
TRINITY_DN59_c0_g1_i10	43896.9	46.69	1.94379e-143	-0.690635	Downregulated	SA-p vs SA
TRINITY_DN59_c0_g1_i6	6257.18	32.94	7.27515e-72	-0.488335	Downregulated	SA-p vs SA
TRINITY_DN59_c0_g1_i7	37060.7	48.37	1.34559e-135	-0.66475	Downregulated	SA-p vs SA
TRINITY_DN594_c2_g1_i2	54	1	0.00188767	-0.329228	Downregulated	SA-p vs SA
TRINITY_DN595_c0_g2_i1	2574	34	1.11437e-40	-0.371967	Downregulated	SA-p vs SA
TRINITY_DN597_c0_g2_i1	3307	8	2.04922e-68	-0.586692	Downregulated	SA-p vs SA
TRINITY_DN597_c1_g1_i1	1464.77	2	1.54411e-49	-0.659041	Downregulated	SA-p vs SA
TRINITY_DN597_c1_g2_i1	160	1	9.57528e-10	-0.466625	Downregulated	SA-p vs SA
TRINITY_DN598_c0_g3_i1	329	1	7.57613e-18	-0.557814	Downregulated	SA-p vs SA
TRINITY_DN5987_c0_g1_i1	11	16	2.84737e-05	0.222756	Upregulated	SA-p vs SA
TRINITY_DN599_c0_g2_i1	11	16	2.84737e-05	0.222756	Upregulated	SA-p vs SA
TRINITY_DN6_c0_g1_i8	9939.98	115240	1.97804e-121	0.48533	Upregulated	SA-p vs SA
TRINITY_DN6_c0_g2_i2	131695	66	1.45168e-181	-0.785825	Downregulated	SA-p vs SA
TRINITY_DN60_c0_g1_i11	1482	3	2.39109e-48	-0.609231	Downregulated	SA-p vs SA
TRINITY_DN60_c1_g2_i10	123	1	1.71009e-07	-0.433358	Downregulated	SA-p vs SA
TRINITY_DN602_c0_g2_i1	4877.03	6.25	6.45629e-85	-0.667062	Downregulated	SA-p vs SA
TRINITY_DN602_c0_g2_i4	2652.23	3.75	1.2883e-65	-0.654626	Downregulated	SA-p vs SA
TRINITY_DN602_c0_g3_i1	474.05	3	3.2331e-21	-0.465048	Downregulated	SA-p vs SA
TRINITY_DN6029_c0_g4_i1	1	5948	2.49013e-197	1.2747	Upregulated	SA-p vs SA
TRINITY_DN6029_c0_g6_i1	1	36062	1.98404e-275	1.50267	Upregulated	SA-p vs SA
TRINITY_DN605_c1_g4_i5	12	27.96	2.41281e-10	0.282358	Upregulated	SA-p vs SA
TRINITY_DN606_c0_g1_i1	420	1	4.65984e-22	-0.588703	Downregulated	SA-p vs SA
TRINITY_DN608_c1_g1_i1	20	30185	1.02526e-267	1.10122	Upregulated	SA-p vs SA
TRINITY_DN61_c0_g6_i1	33	45575	1.35255e-285	1.09	Upregulated	SA-p vs SA
TRINITY_DN610_c0_g1_i1	1	9254	1.86997e-216	1.33062	Upregulated	SA-p vs SA
TRINITY_DN610_c0_g3_i1	11	9337	7.48836e-217	1.02842	Upregulated	SA-p vs SA
TRINITY_DN6117_c0_g1_i2	8611.83	5	5.11228e-108	-0.767213	Downregulated	SA-p vs SA
TRINITY_DN612_c0_g2_i2	645.61	1	2.3579e-30	-0.643089	Downregulated	SA-p vs SA
TRINITY_DN612_c0_g4_i1	2335	1	5.67658e-66	-0.805707	Downregulated	SA-p vs SA
TRINITY_DN6144_c0_g2_i1	850	1	1.71427e-36	-0.67788	Downregulated	SA-p vs SA
TRINITY_DN6144_c0_g3_i1	228	1	2.34453e-13	-0.511426	Downregulated	SA-p vs SA
TRINITY_DN616_c0_g1_i1	1029	3	3.14639e-38	-0.563085	Downregulated	SA-p vs SA
TRINITY_DN616_c0_g2_i2	12778.9	12	1.91017e-116	-0.706394	Downregulated	SA-p vs SA
TRINITY_DN616_c0_g3_i1	2653.22	2	2.86514e-68	-0.734189	Downregulated	SA-p vs SA
TRINITY_DN617_c0_g1_i1	674	3	2.33935e-28	-0.509563	Downregulated	SA-p vs SA
TRINITY_DN6199_c0_g2_i1	45	56817	6.16748e-286	1.07865	Upregulated	SA-p vs SA
TRINITY_DN62_c0_g1_i10	1719	29	1.32935e-31	-0.341019	Downregulated	SA-p vs SA
TRINITY_DN62_c0_g1_i11	2505.63	2	3.08234e-66	-0.726949	Downregulated	SA-p vs SA
TRINITY_DN62_c0_g1_i12	7568.14	11.37	5.52402e-96	-0.646951	Downregulated	SA-p vs SA
TRINITY_DN62_c0_g1_i13	343.41	1	1.08222e-18	-0.563236	Downregulated	SA-p vs SA
TRINITY_DN62_c0_g1_i3	8566.75	24960.6	2.19615e-65	0.310635	Upregulated	SA-p vs SA
TRINITY_DN621_c0_g1_i2	125	4	4.68616e-05	-0.260039	Downregulated	SA-p vs SA
TRINITY_DN621_c0_g1_i3	62	3	0.0126641	-0.207734	Downregulated	SA-p vs SA
TRINITY_DN621_c0_g1_i4	116	3	2.19364e-05	-0.286978	Downregulated	SA-p vs SA
TRINITY_DN621_c0_g1_i5	102	1	2.86969e-06	-0.409677	Downregulated	SA-p vs SA
TRINITY_DN628_c0_g1_i1	590	4	3.04099e-24	-0.456336	Downregulated	SA-p vs SA
TRINITY_DN630_c0_g1_i3	4957.22	6.91	3.77953e-84	-0.656426	Downregulated	SA-p vs SA
TRINITY_DN630_c0_g1_i4	1493.97	0.39	2.53579e-54	-0.868327	Downregulated	SA-p vs SA
TRINITY_DN630_c0_g1_i7	15913.6	4.09	2.02337e-134	-0.870298	Downregulated	SA-p vs SA
TRINITY_DN630_c0_g1_i8	2600.2	7.61	9.08622e-60	-0.562598	Downregulated	SA-p vs SA
TRINITY_DN6308_c0_g2_i1	232	1	1.22763e-13	-0.513626	Downregulated	SA-p vs SA
TRINITY_DN631_c0_g2_i2	3313.89	3	2.7614e-74	-0.711026	Downregulated	SA-p vs SA
TRINITY_DN6333_c1_g2_i1	62	1	0.000857787	-0.346703	Downregulated	SA-p vs SA
TRINITY_DN635_c0_g1_i1	115	38203	5.95397e-245	0.909757	Upregulated	SA-p vs SA
TRINITY_DN635_c2_g1_i1	13	1813	2.90807e-146	0.799966	Upregulated	SA-p vs SA
TRINITY_DN64_c0_g1_i1	617	1	3.2931e-29	-0.637355	Downregulated	SA-p vs SA
TRINITY_DN64_c0_g2_i1	554.58	2.43	1.31816e-25	-0.51155	Downregulated	SA-p vs SA
TRINITY_DN64_c0_g2_i3	9086.42	7.57	2.23306e-106	-0.721535	Downregulated	SA-p vs SA
TRINITY_DN640_c0_g1_i1	875.74	2	1.00557e-35	-0.593974	Downregulated	SA-p vs SA
TRINITY_DN640_c0_g2_i2	37	1	0.0231566	-0.281404	Downregulated	SA-p vs SA
TRINITY_DN640_c1_g1_i2	156	1	1.96314e-09	-0.463423	Downregulated	SA-p vs SA
TRINITY_DN6406_c0_g2_i1	601	2	5.19502e-27	-0.546352	Downregulated	SA-p vs SA
TRINITY_DN6407_c0_g1_i2	1013.22	2	2.53813e-39	-0.61242	Downregulated	SA-p vs SA
TRINITY_DN6407_c0_g1_i9	789.21	1	4.98236e-35	-0.668494	Downregulated	SA-p vs SA
TRINITY_DN641_c1_g1_i1	914	1	1.42843e-38	-0.687063	Downregulated	SA-p vs SA
TRINITY_DN641_c1_g2_i1	797	2	1.08966e-33	-0.582057	Downregulated	SA-p vs SA
TRINITY_DN641_c1_g2_i2	2959	3	1.24976e-70	-0.696697	Downregulated	SA-p vs SA
TRINITY_DN6416_c0_g1_i1	15	8131	7.20923e-211	0.971696	Upregulated	SA-p vs SA
TRINITY_DN6421_c0_g2_i1	13	13652	2.62408e-233	1.05535	Upregulated	SA-p vs SA
TRINITY_DN643_c0_g1_i2	2907.93	4	2.00134e-68	-0.658105	Downregulated	SA-p vs SA
TRINITY_DN6443_c0_g1_i1	74	1	7.45732e-05	-0.369084	Downregulated	SA-p vs SA
TRINITY_DN6448_c0_g1_i3	3982.04	2.01	7.53254e-83	-0.784918	Downregulated	SA-p vs SA
TRINITY_DN65_c0_g1_i4	8	21847.1	1.09399e-253	1.17624	Upregulated	SA-p vs SA
TRINITY_DN651_c2_g1_i1	305	1	5.33418e-17	-0.548232	Downregulated	SA-p vs SA
TRINITY_DN6520_c0_g1_i1	20	365	7.54626e-80	0.542722	Upregulated	SA-p vs SA
TRINITY_DN6536_c0_g1_i1	41	46	3.46905e-10	0.189915	Upregulated	SA-p vs SA
TRINITY_DN657_c2_g1_i1	3	19328	2.25802e-248	1.28481	Upregulated	SA-p vs SA
TRINITY_DN658_c0_g1_i1	125	1	1.71009e-07	-0.435399	Downregulated	SA-p vs SA
TRINITY_DN66_c0_g1_i2	103.2	1	2.86969e-06	-0.411157	Downregulated	SA-p vs SA
TRINITY_DN6628_c0_g2_i2	72.13	1	0.000112452	-0.365846	Downregulated	SA-p vs SA
TRINITY_DN6638_c0_g1_i1	187	257	4.28968e-28	0.215581	Upregulated	SA-p vs SA
TRINITY_DN667_c0_g2_i2	433.54	4	1.76696e-18	-0.417358	Downregulated	SA-p vs SA
TRINITY_DN668_c0_g1_i1	1304	1	4.29708e-48	-0.732015	Downregulated	SA-p vs SA
TRINITY_DN6689_c0_g1_i4	7432	1	1.79172e-107	-0.952161	Downregulated	SA-p vs SA
TRINITY_DN671_c0_g1_i1	26	32	2.86567e-08	0.201625	Upregulated	SA-p vs SA
TRINITY_DN671_c1_g1_i1	54	53	3.28553e-10	0.172995	Upregulated	SA-p vs SA
TRINITY_DN673_c0_g1_i3	43.87	144240	0	1.19972	Upregulated	SA-p vs SA
TRINITY_DN673_c0_g1_i5	295.16	19.09	3.06913e-05	-0.171029	Downregulated	SA-p vs SA
TRINITY_DN673_c0_g3_i1	234	2	2.34669e-12	-0.427032	Downregulated	SA-p vs SA
TRINITY_DN6761_c0_g11_i1	13	2042	2.40956e-151	0.815012	Upregulated	SA-p vs SA
TRINITY_DN679_c0_g2_i6	582.51	2	8.45714e-27	-0.542399	Downregulated	SA-p vs SA
TRINITY_DN680_c0_g4_i1	32	2119	5.32977e-153	0.705749	Upregulated	SA-p vs SA
TRINITY_DN680_c1_g1_i2	11	21361	1.02906e-252	1.13311	Upregulated	SA-p vs SA
TRINITY_DN6816_c0_g1_i1	211	1	3.2101e-12	-0.501625	Downregulated	SA-p vs SA
TRINITY_DN6820_c0_g1_i2	18	24	3.78178e-07	0.21175	Upregulated	SA-p vs SA
TRINITY_DN6859_c0_g1_i1	423	2	9.80319e-21	-0.501924	Downregulated	SA-p vs SA
TRINITY_DN6869_c0_g1_i1	19	23	9.25093e-07	0.199527	Upregulated	SA-p vs SA
TRINITY_DN6869_c0_g2_i1	19	41	3.27859e-14	0.272651	Upregulated	SA-p vs SA
TRINITY_DN688_c0_g1_i1	740	1	2.67236e-33	-0.66035	Downregulated	SA-p vs SA
TRINITY_DN689_c0_g2_i1	18	21783	1.45105e-253	1.07329	Upregulated	SA-p vs SA
TRINITY_DN6907_c0_g1_i1	1257	2	3.01245e-45	-0.639691	Downregulated	SA-p vs SA
TRINITY_DN6943_c0_g1_i1	6517	1	9.09099e-103	-0.935542	Downregulated	SA-p vs SA
TRINITY_DN6944_c0_g1_i6	3736.83	7	7.66787e-74	-0.619041	Downregulated	SA-p vs SA
TRINITY_DN6945_c0_g2_i1	52	7139	9.32327e-194	0.797979	Upregulated	SA-p vs SA
TRINITY_DN698_c0_g5_i1	6	2015	9.59575e-151	0.911133	Upregulated	SA-p vs SA
TRINITY_DN698_c0_g8_i2	1	1326.14	7.17286e-133	1.08486	Upregulated	SA-p vs SA
TRINITY_DN6994_c1_g2_i1	242	1	1.08239e-13	-0.518965	Downregulated	SA-p vs SA
TRINITY_DN6996_c0_g2_i1	4	63063	1.09382e-299	1.39801	Upregulated	SA-p vs SA
TRINITY_DN7_c0_g1_i1	7975.95	14.29	2.74195e-95	-0.624675	Downregulated	SA-p vs SA
TRINITY_DN7_c0_g1_i3	2509.44	0.89	5.65261e-68	-0.829562	Downregulated	SA-p vs SA
TRINITY_DN7_c0_g1_i5	14643.5	14.51	6.7626e-119	-0.699596	Downregulated	SA-p vs SA
TRINITY_DN7_c0_g1_i8	609.16	1.31	6.10839e-29	-0.601581	Downregulated	SA-p vs SA
TRINITY_DN70_c0_g2_i1	13	3431	1.27874e-173	0.880653	Upregulated	SA-p vs SA
TRINITY_DN70_c0_g3_i1	8	2938	6.23307e-167	0.922445	Upregulated	SA-p vs SA
TRINITY_DN70_c0_g4_i1	11	8454	1.49538e-212	1.01586	Upregulated	SA-p vs SA
TRINITY_DN70_c1_g1_i12	26.65	11527.9	5.44622e-226	0.943152	Upregulated	SA-p vs SA
TRINITY_DN70_c1_g1_i2	29.35	4338.55	9.20443e-184	0.80733	Upregulated	SA-p vs SA
TRINITY_DN70_c1_g1_i3	24	21257	1.65939e-252	1.0338	Upregulated	SA-p vs SA
TRINITY_DN70_c1_g2_i1	6	8067	1.60784e-210	1.0866	Upregulated	SA-p vs SA
TRINITY_DN707_c0_g1_i2	54	2	0.00841274	-0.241548	Downregulated	SA-p vs SA
TRINITY_DN71_c0_g2_i1	1	14872	5.21317e-237	1.39063	Upregulated	SA-p vs SA
TRINITY_DN710_c0_g1_i1	6005	3	1.1611e-96	-0.786223	Downregulated	SA-p vs SA
TRINITY_DN710_c1_g1_i2	1659	4	1.76213e-50	-0.587112	Downregulated	SA-p vs SA
TRINITY_DN710_c2_g1_i1	831	2	2.78582e-34	-0.587341	Downregulated	SA-p vs SA
TRINITY_DN711_c0_g1_i5	3082.91	8.32	7.18834e-66	-0.572855	Downregulated	SA-p vs SA
TRINITY_DN711_c0_g1_i8	416.95	1.68	2.04888e-20	-0.522157	Downregulated	SA-p vs SA
TRINITY_DN7118_c2_g2_i1	1	13682	2.1525e-233	1.38008	Upregulated	SA-p vs SA
TRINITY_DN712_c0_g1_i1	533	1	3.16028e-26	-0.618843	Downregulated	SA-p vs SA
TRINITY_DN712_c1_g1_i10	6865.5	45	6.50111e-69	-0.460608	Downregulated	SA-p vs SA
TRINITY_DN7129_c0_g1_i1	114	2	6.58386e-06	-0.336067	Downregulated	SA-p vs SA
TRINITY_DN7142_c0_g1_i1	1	1015	1.48636e-121	1.05104	Upregulated	SA-p vs SA
TRINITY_DN7156_c0_g2_i4	294.44	1	2.30313e-16	-0.543775	Downregulated	SA-p vs SA
TRINITY_DN7156_c0_g3_i1	2123	1	1.27599e-62	-0.793667	Downregulated	SA-p vs SA
TRINITY_DN7164_c0_g2_i2	12622	4	9.32221e-125	-0.8438	Downregulated	SA-p vs SA
TRINITY_DN7164_c1_g1_i1	829.87	1	6.68306e-36	-0.674848	Downregulated	SA-p vs SA
TRINITY_DN719_c0_g2_i1	39.25	1.4	0.0153481	-0.246309	Downregulated	SA-p vs SA
TRINITY_DN719_c0_g2_i2	2236.75	1.6	9.72693e-63	-0.740817	Downregulated	SA-p vs SA
TRINITY_DN72_c0_g2_i2	24	475754	0	1.42698	Upregulated	SA-p vs SA
TRINITY_DN7208_c0_g4_i1	81436	192	2.10801e-126	-0.589946	Downregulated	SA-p vs SA
TRINITY_DN721_c0_g1_i1	61	1	0.000857787	-0.344646	Downregulated	SA-p vs SA
TRINITY_DN7211_c1_g3_i1	1	3524	9.65895e-175	1.20849	Upregulated	SA-p vs SA
TRINITY_DN7230_c0_g1_i3	25.01	37.31	2.22191e-10	0.225956	Upregulated	SA-p vs SA
TRINITY_DN7230_c0_g1_i6	37.55	73.8	6.42451e-20	0.26083	Upregulated	SA-p vs SA
TRINITY_DN726_c0_g2_i1	123	1	1.71009e-07	-0.433358	Downregulated	SA-p vs SA
TRINITY_DN7260_c0_g1_i1	13	17694	1.50908e-244	1.08815	Upregulated	SA-p vs SA
TRINITY_DN727_c0_g1_i1	2444	1	5.11853e-67	-0.811479	Downregulated	SA-p vs SA
TRINITY_DN7298_c0_g1_i1	1	4090	3.64087e-181	1.22733	Upregulated	SA-p vs SA
TRINITY_DN73_c0_g1_i1	3	6769	6.30998e-203	1.15209	Upregulated	SA-p vs SA
TRINITY_DN73_c0_g7_i1	1	4094	3.30897e-181	1.22745	Upregulated	SA-p vs SA
TRINITY_DN73_c0_g9_i1	1	4205	2.31327e-182	1.23084	Upregulated	SA-p vs SA
TRINITY_DN732_c0_g1_i1	857.16	1	8.73999e-37	-0.678941	Downregulated	SA-p vs SA
TRINITY_DN732_c0_g3_i1	718	2	6.89059e-31	-0.568852	Downregulated	SA-p vs SA
TRINITY_DN734_c0_g1_i1	1200	5	6.86115e-40	-0.517915	Downregulated	SA-p vs SA
TRINITY_DN735_c0_g2_i3	782.56	1	7.11149e-35	-0.667423	Downregulated	SA-p vs SA
TRINITY_DN736_c0_g1_i1	4912	8	1.95351e-82	-0.636739	Downregulated	SA-p vs SA
TRINITY_DN739_c0_g2_i12	830.1	1.98	3.29834e-34	-0.588475	Downregulated	SA-p vs SA
TRINITY_DN739_c0_g2_i7	1730.61	0.02	1.25632e-58	-1.26266	Downregulated	SA-p vs SA
TRINITY_DN739_c0_g3_i1	2130	1	9.8541e-63	-0.794084	Downregulated	SA-p vs SA
TRINITY_DN74_c0_g1_i7	85672	213	7.83454e-125	-0.583231	Downregulated	SA-p vs SA
TRINITY_DN740_c1_g1_i1	1	2213	9.53625e-155	1.14964	Upregulated	SA-p vs SA
TRINITY_DN744_c0_g4_i1	344742	870	5.49324e-130	-0.581342	Downregulated	SA-p vs SA
TRINITY_DN7446_c0_g1_i5	89.8	2	0.000148835	-0.305883	Downregulated	SA-p vs SA
TRINITY_DN745_c0_g3_i2	110.57	5	0.000674911	-0.216296	Downregulated	SA-p vs SA
TRINITY_DN746_c0_g1_i2	109	6	0.0023906	-0.191424	Downregulated	SA-p vs SA
TRINITY_DN7480_c0_g1_i1	12496	16	1.32701e-111	-0.667171	Downregulated	SA-p vs SA
TRINITY_DN75_c0_g1_i7	33	6782.13	4.81681e-203	0.849014	Upregulated	SA-p vs SA
TRINITY_DN75_c3_g1_i1	1	3261	2.1166e-171	1.19868	Upregulated	SA-p vs SA
TRINITY_DN751_c0_g1_i2	85.52	2	0.000142624	-0.299706	Downregulated	SA-p vs SA
TRINITY_DN753_c0_g2_i3	7333.12	92.17	8.07393e-54	-0.378249	Downregulated	SA-p vs SA
TRINITY_DN753_c0_g2_i4	6668.68	11.83	3.77147e-90	-0.625929	Downregulated	SA-p vs SA
TRINITY_DN7530_c0_g1_i1	30	42	2.5454e-11	0.217922	Upregulated	SA-p vs SA
TRINITY_DN7531_c0_g2_i7	313.35	1	1.67563e-17	-0.551649	Downregulated	SA-p vs SA
TRINITY_DN754_c0_g1_i1	50403	28	7.76942e-161	-0.772798	Downregulated	SA-p vs SA
TRINITY_DN7546_c0_g3_i2	9	15421.7	1.37323e-238	1.11728	Upregulated	SA-p vs SA
TRINITY_DN758_c0_g1_i10	7163.95	0.95	1.43051e-106	-0.954003	Downregulated	SA-p vs SA
TRINITY_DN758_c0_g1_i3	13045.8	9.82	5.42638e-119	-0.734368	Downregulated	SA-p vs SA
TRINITY_DN758_c0_g1_i6	10902.4	0.23	2.3565e-124	-1.18654	Downregulated	SA-p vs SA
TRINITY_DN759_c0_g1_i1	855	5	3.3317e-31	-0.475036	Downregulated	SA-p vs SA
TRINITY_DN76_c0_g1_i11	535.44	0.05	2.11198e-29	-0.998364	Downregulated	SA-p vs SA
TRINITY_DN76_c0_g1_i2	4334.56	1.95	1.49092e-85	-0.799481	Downregulated	SA-p vs SA
TRINITY_DN76_c0_g1_i5	913.69	3	2.22953e-35	-0.548051	Downregulated	SA-p vs SA
TRINITY_DN76_c0_g2_i4	475.57	1	2.81292e-24	-0.604422	Downregulated	SA-p vs SA
TRINITY_DN760_c0_g1_i2	128.25	1.14	8.08101e-08	-0.422071	Downregulated	SA-p vs SA
TRINITY_DN760_c0_g1_i3	2872.4	1.14	6.60373e-73	-0.815335	Downregulated	SA-p vs SA
TRINITY_DN7606_c0_g1_i5	594.88	2	9.60081e-27	-0.545057	Downregulated	SA-p vs SA
TRINITY_DN761_c1_g1_i2	6953	3	5.53435e-102	-0.804765	Downregulated	SA-p vs SA
TRINITY_DN763_c0_g2_i3	187	1	4.27624e-11	-0.48635	Downregulated	SA-p vs SA
TRINITY_DN763_c0_g3_i1	165	1	4.68161e-10	-0.470518	Downregulated	SA-p vs SA
TRINITY_DN765_c0_g1_i1	1	1775	2.64496e-145	1.12174	Upregulated	SA-p vs SA
TRINITY_DN765_c0_g2_i1	1	2185	3.35287e-154	1.14803	Upregulated	SA-p vs SA
TRINITY_DN766_c0_g1_i1	1601.69	2	6.36036e-52	-0.670345	Downregulated	SA-p vs SA
TRINITY_DN766_c0_g1_i5	11442.3	2	2.04186e-123	-0.919067	Downregulated	SA-p vs SA
TRINITY_DN78_c0_g1_i6	1	573	1.06479e-97	0.978716	Upregulated	SA-p vs SA
TRINITY_DN7812_c0_g1_i1	18	61843	7.67119e-299	1.20528	Upregulated	SA-p vs SA
TRINITY_DN784_c0_g1_i1	2940	3	2.24485e-70	-0.695883	Downregulated	SA-p vs SA
TRINITY_DN787_c0_g1_i1	116	1	2.80934e-07	-0.425947	Downregulated	SA-p vs SA
TRINITY_DN791_c0_g1_i5	54	1	0.00188767	-0.329228	Downregulated	SA-p vs SA
TRINITY_DN791_c0_g1_i8	489	1	6.85812e-25	-0.607944	Downregulated	SA-p vs SA
TRINITY_DN791_c0_g2_i3	652.68	0.86	1.29499e-30	-0.663545	Downregulated	SA-p vs SA
TRINITY_DN791_c0_g2_i5	1113.67	2.14	1.34056e-41	-0.615818	Downregulated	SA-p vs SA
TRINITY_DN7917_c0_g1_i1	1219	1	5.06243e-46	-0.723488	Downregulated	SA-p vs SA
TRINITY_DN792_c0_g1_i1	1	2361.98	1.54293e-157	1.15788	Upregulated	SA-p vs SA
TRINITY_DN793_c0_g1_i8	77.75	30	0.0154866	0.0548979	Upregulated	SA-p vs SA
TRINITY_DN794_c0_g1_i1	52	1	0.00285251	-0.324454	Downregulated	SA-p vs SA
TRINITY_DN797_c0_g1_i1	617.95	1	2.68231e-29	-0.63755	Downregulated	SA-p vs SA
TRINITY_DN797_c0_g1_i10	475.75	4	2.39595e-20	-0.42911	Downregulated	SA-p vs SA
TRINITY_DN797_c0_g1_i3	4701.23	6	1.68569e-83	-0.667582	Downregulated	SA-p vs SA
TRINITY_DN8_c0_g1_i1	15633	20	2.84116e-117	-0.667276	Downregulated	SA-p vs SA
TRINITY_DN80_c0_g1_i20	37	1	0.0231566	-0.281404	Downregulated	SA-p vs SA
TRINITY_DN80_c0_g1_i34	18.7	12	0.0131976	0.119244	Upregulated	SA-p vs SA
TRINITY_DN80_c0_g1_i52	24.92	876	1.43242e-115	0.625644	Upregulated	SA-p vs SA
TRINITY_DN80_c0_g1_i80	1869	34	1.95561e-31	-0.331481	Downregulated	SA-p vs SA
TRINITY_DN80_c0_g1_i84	1315.8	2.49	1.13878e-46	-0.617755	Downregulated	SA-p vs SA
TRINITY_DN8020_c0_g3_i1	462	1	1.49383e-23	-0.60076	Downregulated	SA-p vs SA
TRINITY_DN8041_c1_g1_i1	18	965	1.46375e-119	0.679032	Upregulated	SA-p vs SA
TRINITY_DN8045_c1_g2_i1	1	594	3.71159e-99	0.983269	Upregulated	SA-p vs SA
TRINITY_DN81_c1_g1_i12	442.52	4	7.05564e-19	-0.419951	Downregulated	SA-p vs SA
TRINITY_DN8147_c0_g1_i1	2	6853	1.85898e-203	1.20494	Upregulated	SA-p vs SA
TRINITY_DN8148_c0_g3_i4	43021.3	14	1.54985e-165	-0.840447	Downregulated	SA-p vs SA
TRINITY_DN817_c1_g1_i1	953	2	1.51607e-37	-0.604669	Downregulated	SA-p vs SA
TRINITY_DN8196_c0_g2_i1	1	5718	1.25564e-195	1.26972	Upregulated	SA-p vs SA
TRINITY_DN82_c0_g1_i1	21	14322	2.182e-235	1.00074	Upregulated	SA-p vs SA
TRINITY_DN821_c1_g1_i4	198	1	7.74274e-12	-0.493581	Downregulated	SA-p vs SA
TRINITY_DN8224_c0_g2_i5	12	16	1.73427e-05	0.21175	Upregulated	SA-p vs SA
TRINITY_DN8231_c0_g1_i1	1	21680	2.36543e-253	1.43831	Upregulated	SA-p vs SA
TRINITY_DN8231_c0_g4_i1	13	8063	1.66085e-210	0.988735	Upregulated	SA-p vs SA
TRINITY_DN828_c0_g2_i8	129.37	2	1.31272e-06	-0.352066	Downregulated	SA-p vs SA
TRINITY_DN828_c1_g1_i1	515.9	2	5.32082e-24	-0.527039	Downregulated	SA-p vs SA
TRINITY_DN83_c0_g2_i2	53690.1	78	3.71361e-138	-0.651195	Downregulated	SA-p vs SA
TRINITY_DN83_c0_g3_i1	4617	5	8.57136e-84	-0.688357	Downregulated	SA-p vs SA
TRINITY_DN83_c0_g4_i1	671	4	8.12125e-27	-0.472609	Downregulated	SA-p vs SA
TRINITY_DN83_c2_g1_i1	208	1	4.46631e-12	-0.499813	Downregulated	SA-p vs SA
TRINITY_DN8305_c0_g1_i1	61	16961	4.19297e-227	0.887249	Upregulated	SA-p vs SA
TRINITY_DN832_c0_g1_i1	1253	2	3.42415e-45	-0.639288	Downregulated	SA-p vs SA
TRINITY_DN8324_c0_g2_i1	32	5908	4.38332e-197	0.835453	Upregulated	SA-p vs SA
TRINITY_DN835_c0_g5_i1	36	9755	4.62892e-215	0.883987	Upregulated	SA-p vs SA
TRINITY_DN8356_c0_g2_i1	9	2064	8.79062e-152	0.862883	Upregulated	SA-p vs SA
TRINITY_DN8358_c0_g1_i1	172	2	3.57751e-09	-0.388094	Downregulated	SA-p vs SA
TRINITY_DN8363_c0_g3_i1	46	6529.83	3.26469e-192	0.802206	Upregulated	SA-p vs SA
TRINITY_DN8370_c0_g1_i1	18	4717	2.38815e-187	0.879755	Upregulated	SA-p vs SA
TRINITY_DN8370_c0_g2_i1	17	7137	3.12059e-205	0.939369	Upregulated	SA-p vs SA
TRINITY_DN839_c0_g2_i1	14	12425	3.15939e-229	1.03406	Upregulated	SA-p vs SA
TRINITY_DN84_c0_g1_i3	761	3	6.93632e-31	-0.52492	Downregulated	SA-p vs SA
TRINITY_DN840_c0_g1_i3	9808.47	60	1.06931e-75	-0.469343	Downregulated	SA-p vs SA
TRINITY_DN848_c0_g1_i1	5080	7	4.41218e-85	-0.657884	Downregulated	SA-p vs SA
TRINITY_DN8517_c0_g3_i4	79.19	4	0.00691861	-0.202299	Downregulated	SA-p vs SA
TRINITY_DN8517_c1_g1_i1	289	2	1.11799e-14	-0.453736	Downregulated	SA-p vs SA
TRINITY_DN8526_c0_g1_i1	177	1	1.69856e-10	-0.479398	Downregulated	SA-p vs SA
TRINITY_DN8526_c1_g3_i1	2505	18	9.74576e-50	-0.448979	Downregulated	SA-p vs SA
TRINITY_DN86_c0_g1_i3	2491.16	1.52	5.21127e-66	-0.760932	Downregulated	SA-p vs SA
TRINITY_DN86_c0_g1_i45	586.45	1.48	1.70424e-28	-0.58134	Downregulated	SA-p vs SA
TRINITY_DN86_c0_g2_i4	19987.9	40	3.28594e-114	-0.610682	Downregulated	SA-p vs SA
TRINITY_DN86_c0_g3_i1	1987	1	2.58877e-60	-0.785293	Downregulated	SA-p vs SA
TRINITY_DN862_c0_g1_i1	257	1	1.2137e-14	-0.526572	Downregulated	SA-p vs SA
TRINITY_DN864_c0_g1_i1	212	1	2.3088e-12	-0.502223	Downregulated	SA-p vs SA
TRINITY_DN864_c0_g2_i1	2794	3	1.59963e-68	-0.68944	Downregulated	SA-p vs SA
TRINITY_DN866_c0_g3_i1	4268	3	7.29021e-84	-0.743032	Downregulated	SA-p vs SA
TRINITY_DN8676_c0_g1_i3	120	1	3.62217e-07	-0.430235	Downregulated	SA-p vs SA
TRINITY_DN868_c1_g1_i1	1	2160	1.04131e-153	1.14657	Upregulated	SA-p vs SA
TRINITY_DN8689_c4_g1_i1	19	471	5.97615e-90	0.581462	Upregulated	SA-p vs SA
TRINITY_DN87_c0_g1_i1	1672.5	1	5.04408e-55	-0.763497	Downregulated	SA-p vs SA
TRINITY_DN87_c0_g1_i2	279.98	1	1.36262e-15	-0.537405	Downregulated	SA-p vs SA
TRINITY_DN873_c0_g1_i1	75	3.33	0.00318237	-0.218612	Downregulated	SA-p vs SA
TRINITY_DN8763_c0_g1_i1	562	1	1.45645e-27	-0.625545	Downregulated	SA-p vs SA
TRINITY_DN877_c0_g1_i11	672	1	2.18881e-31	-0.648157	Downregulated	SA-p vs SA
TRINITY_DN877_c0_g1_i4	1682.16	6	4.07369e-48	-0.537577	Downregulated	SA-p vs SA
TRINITY_DN877_c1_g1_i1	21926	40	4.77603e-118	-0.622389	Downregulated	SA-p vs SA
TRINITY_DN877_c1_g2_i4	2615.5	0.5	2.66966e-71	-0.907737	Downregulated	SA-p vs SA
TRINITY_DN8778_c0_g2_i1	1	1233	8.65099e-130	1.07565	Upregulated	SA-p vs SA
TRINITY_DN8785_c0_g1_i3	1163.34	2	6.59176e-43	-0.629896	Downregulated	SA-p vs SA
TRINITY_DN8785_c1_g1_i1	540	3	1.59727e-23	-0.481524	Downregulated	SA-p vs SA
TRINITY_DN88_c0_g7_i1	2	5093	1.24578e-190	1.16739	Upregulated	SA-p vs SA
TRINITY_DN8846_c0_g1_i1	7	337	2.20716e-76	0.665424	Upregulated	SA-p vs SA
TRINITY_DN886_c0_g1_i2	355.9	2	8.63017e-18	-0.480076	Downregulated	SA-p vs SA
TRINITY_DN886_c1_g1_i1	625	6	1.90825e-23	-0.412336	Downregulated	SA-p vs SA
TRINITY_DN888_c0_g1_i1	1	8111	9.53115e-211	1.31394	Upregulated	SA-p vs SA
TRINITY_DN888_c0_g10_i1	26	2745	4.57321e-164	0.764756	Upregulated	SA-p vs SA
TRINITY_DN9_c0_g1_i1	8125.22	7167.99	8.69203e-25	0.159504	Upregulated	SA-p vs SA
TRINITY_DN9_c0_g1_i12	46457.9	57	6.54148e-141	-0.672569	Downregulated	SA-p vs SA
TRINITY_DN9_c0_g1_i17	42022.9	284.01	4.34356e-85	-0.456732	Downregulated	SA-p vs SA
TRINITY_DN9_c0_g1_i18	4526.56	5	5.02424e-83	-0.685855	Downregulated	SA-p vs SA
TRINITY_DN9_c1_g1_i3	432.56	38135	4.73713e-201	0.741952	Upregulated	SA-p vs SA
TRINITY_DN90_c0_g1_i11	1655	2	5.61774e-53	-0.674487	Downregulated	SA-p vs SA
TRINITY_DN90_c0_g1_i15	16467.9	11.41	8.22565e-128	-0.744852	Downregulated	SA-p vs SA
TRINITY_DN90_c0_g1_i22	1103.55	2.59	2.89775e-40	-0.590522	Downregulated	SA-p vs SA
TRINITY_DN90_c0_g1_i8	9714	15.01	4.38035e-102	-0.643394	Downregulated	SA-p vs SA
TRINITY_DN90_c0_g1_i9	19744.3	8	1.57633e-138	-0.812717	Downregulated	SA-p vs SA
TRINITY_DN9004_c0_g2_i1	1105	3	2.52226e-40	-0.572099	Downregulated	SA-p vs SA
TRINITY_DN902_c0_g2_i2	2	11816	4.84512e-227	1.27385	Upregulated	SA-p vs SA
TRINITY_DN903_c0_g1_i4	329.74	1	5.72638e-18	-0.558098	Downregulated	SA-p vs SA
TRINITY_DN903_c0_g2_i1	459.78	4	1.14802e-19	-0.424791	Downregulated	SA-p vs SA
TRINITY_DN9078_c1_g1_i1	3521	2	3.46142e-78	-0.769984	Downregulated	SA-p vs SA
TRINITY_DN91_c0_g5_i1	14	62148	4.70127e-299	1.23769	Upregulated	SA-p vs SA
TRINITY_DN91_c6_g1_i1	1	2364	1.40803e-157	1.15799	Upregulated	SA-p vs SA
TRINITY_DN9132_c0_g1_i2	1	3199.18	1.40628e-170	1.19626	Upregulated	SA-p vs SA
TRINITY_DN9132_c0_g2_i1	10	33391	4.30849e-272	1.20167	Upregulated	SA-p vs SA
TRINITY_DN914_c0_g1_i1	670	2	1.10829e-29	-0.5601	Downregulated	SA-p vs SA
TRINITY_DN917_c0_g1_i1	585	1	1.70424e-28	-0.630619	Downregulated	SA-p vs SA
TRINITY_DN9174_c1_g1_i1	19	3903	3.4986e-179	0.848954	Upregulated	SA-p vs SA
TRINITY_DN9177_c0_g1_i1	519	2	4.26593e-24	-0.527796	Downregulated	SA-p vs SA
TRINITY_DN918_c0_g2_i1	55.37	1.47	0.00124544	-0.283663	Downregulated	SA-p vs SA
TRINITY_DN918_c0_g2_i2	4186.33	1.53	3.25365e-84	-0.825763	Downregulated	SA-p vs SA
TRINITY_DN918_c0_g3_i1	420	1	4.65984e-22	-0.588703	Downregulated	SA-p vs SA
TRINITY_DN9187_c0_g1_i1	1	175	1.04226e-51	0.82868	Upregulated	SA-p vs SA
TRINITY_DN919_c0_g1_i1	131	1	5.55759e-08	-0.441329	Downregulated	SA-p vs SA
TRINITY_DN919_c0_g3_i5	3996.1	7.64	5.14723e-75	-0.616459	Downregulated	SA-p vs SA
TRINITY_DN919_c0_g3_i9	6659.64	9.36	5.11329e-93	-0.655382	Downregulated	SA-p vs SA
TRINITY_DN92_c0_g1_i1	776.86	10	3.1056e-24	-0.375233	Downregulated	SA-p vs SA
TRINITY_DN92_c0_g2_i1	1365.87	2.94	9.8605e-46	-0.601465	Downregulated	SA-p vs SA
TRINITY_DN92_c0_g2_i2	195.83	1.06	1.08822e-11	-0.484816	Downregulated	SA-p vs SA
TRINITY_DN92_c0_g3_i2	2413.4	2	6.94912e-65	-0.722205	Downregulated	SA-p vs SA
TRINITY_DN9313_c0_g2_i1	872	3	4.6087e-34	-0.542144	Downregulated	SA-p vs SA
TRINITY_DN9391_c0_g1_i1	4759	1	6.66287e-91	-0.895775	Downregulated	SA-p vs SA
TRINITY_DN940_c0_g1_i7	943	10	9.90567e-29	-0.399748	Downregulated	SA-p vs SA
TRINITY_DN945_c0_g1_i2	551.86	2	1.63293e-25	-0.535562	Downregulated	SA-p vs SA
TRINITY_DN946_c0_g2_i2	2631.29	4	2.62302e-65	-0.645459	Downregulated	SA-p vs SA
TRINITY_DN9460_c0_g1_i1	15	306	7.70573e-73	0.55681	Upregulated	SA-p vs SA
TRINITY_DN95_c0_g2_i1	8	11876	2.89227e-227	1.09913	Upregulated	SA-p vs SA
TRINITY_DN95_c0_g3_i1	1	8354	5.03639e-212	1.31767	Upregulated	SA-p vs SA
TRINITY_DN950_c0_g1_i1	24156	11	6.58966e-144	-0.797944	Downregulated	SA-p vs SA
TRINITY_DN950_c0_g2_i2	1942.68	4	3.12381e-55	-0.60708	Downregulated	SA-p vs SA
TRINITY_DN950_c1_g1_i1	458	2	6.47549e-22	-0.51198	Downregulated	SA-p vs SA
TRINITY_DN9523_c0_g1_i1	2	10226	8.81161e-221	1.25557	Upregulated	SA-p vs SA
TRINITY_DN955_c0_g1_i1	14	22	1.27111e-07	0.232533	Upregulated	SA-p vs SA
TRINITY_DN9551_c0_g1_i1	0.31	223.28	2.37717e-60	1.00765	Upregulated	SA-p vs SA
TRINITY_DN9551_c0_g1_i3	9.69	105.34	1.81724e-36	0.477189	Upregulated	SA-p vs SA
TRINITY_DN956_c0_g2_i3	1568.38	3.59	1.16917e-48	-0.593686	Downregulated	SA-p vs SA
TRINITY_DN9630_c1_g1_i2	51	11469.3	2.97846e-214	0.860407	Upregulated	SA-p vs SA
TRINITY_DN9630_c2_g1_i1	1	3739	2.68742e-177	1.21598	Upregulated	SA-p vs SA
TRINITY_DN965_c1_g1_i2	5478	30	1.13113e-68	-0.483339	Downregulated	SA-p vs SA
TRINITY_DN968_c0_g1_i2	7489.28	0.64	9.03802e-108	-1.00959	Downregulated	SA-p vs SA
TRINITY_DN968_c0_g1_i4	1140.72	1.36	5.71463e-44	-0.676197	Downregulated	SA-p vs SA
TRINITY_DN97_c0_g1_i3	1	2589.09	1.76352e-161	1.16949	Upregulated	SA-p vs SA
TRINITY_DN97_c0_g1_i5	13	14539.3	4.90858e-236	1.06331	Upregulated	SA-p vs SA
TRINITY_DN97_c0_g3_i1	14	13313	3.22868e-232	1.04279	Upregulated	SA-p vs SA
TRINITY_DN97_c0_g5_i1	1	3887	5.714e-179	1.22089	Upregulated	SA-p vs SA
TRINITY_DN9721_c0_g1_i1	201	1	3.92816e-12	-0.495483	Downregulated	SA-p vs SA
TRINITY_DN9743_c0_g1_i1	12	284	6.88103e-70	0.575599	Upregulated	SA-p vs SA
TRINITY_DN9761_c0_g2_i3	730	3	7.0095e-30	-0.51966	Downregulated	SA-p vs SA
TRINITY_DN9781_c1_g1_i2	19	2062.23	8.79062e-152	0.768255	Upregulated	SA-p vs SA
TRINITY_DN9781_c1_g1_i7	5.45	5524.68	3.76445e-194	1.05088	Upregulated	SA-p vs SA
TRINITY_DN9781_c1_g1_i8	0.55	915.54	3.12928e-117	1.11362	Upregulated	SA-p vs SA
TRINITY_DN979_c0_g1_i2	2912.19	2	1.14007e-71	-0.74597	Downregulated	SA-p vs SA
TRINITY_DN9797_c0_g3_i1	1	4078	4.90461e-181	1.22696	Upregulated	SA-p vs SA
TRINITY_DN98_c0_g1_i1	8	4082	4.27049e-181	0.964044	Upregulated	SA-p vs SA
TRINITY_DN982_c0_g1_i1	6696	8	1.4476e-94	-0.675931	Downregulated	SA-p vs SA
TRINITY_DN982_c0_g2_i1	257	1	1.2137e-14	-0.526572	Downregulated	SA-p vs SA
TRINITY_DN9832_c0_g3_i3	3	1530.17	5.66009e-139	0.963996	Upregulated	SA-p vs SA
TRINITY_DN9832_c1_g4_i1	1	3229	5.61684e-171	1.19743	Upregulated	SA-p vs SA
TRINITY_DN984_c0_g1_i1	2131	4	2.14437e-58	-0.618784	Downregulated	SA-p vs SA
TRINITY_DN984_c1_g1_i1	1017	3	6.52318e-38	-0.561601	Downregulated	SA-p vs SA
TRINITY_DN986_c0_g2_i4	398.66	5	4.27862e-16	-0.378521	Downregulated	SA-p vs SA
TRINITY_DN986_c0_g3_i1	290	2	1.11799e-14	-0.454173	Downregulated	SA-p vs SA
TRINITY_DN988_c0_g1_i3	1	15060	1.49047e-237	1.39222	Upregulated	SA-p vs SA
TRINITY_DN990_c0_g2_i2	1900.67	1	2.2674e-59	-0.779674	Downregulated	SA-p vs SA
TRINITY_DN992_c0_g1_i1	931	1	3.96126e-39	-0.689394	Downregulated	SA-p vs SA
TRINITY_DN992_c0_g2_i1	1173	1	8.40428e-45	-0.718622	Downregulated	SA-p vs SA
TRINITY_DN992_c1_g1_i1	402	1	3.58416e-21	-0.583163	Downregulated	SA-p vs SA
TRINITY_DN9960_c0_g2_i1	186	85	1.87134e-05	0.0763017	Upregulated	SA-p vs SA
TRINITY_DN9990_c0_g3_i1	1	30881.7	1.06275e-268	1.48306	Upregulated	SA-p vs SA
TRINITY_DN14525_c0_g1_i1	5	10	1.32796e-238	0.263039	Upregulated	SA-p vs SA
TRINITY_DN16080_c1_g1_i1	4	9	1.02142e-116	0.277938	Upregulated	SA-p vs SA
TRINITY_DN32746_c0_g1_i1	3	5	7.52195e-118	0.239976	Upregulated	SA-p vs SA
TRINITY_DN13326_c0_g1_i6	1	4	1.292e-57	0.350719	Upregulated	SA-p vs SA
TRINITY_DN16793_c0_g1_i3	5	5	2.37671e-15	0.175359	Upregulated	SA-p vs SA
TRINITY_DN26630_c0_g1_i1	3	6	4.56508e-147	0.263039	Upregulated	SA-p vs SA
TRINITY_DN16109_c0_g1_i1	2	1	3.81711e-256	0.0876797	Upregulated	SA-p vs SA
TRINITY_DN37830_c0_g1_i1	5	6	1.5909e-105	0.198422	Upregulated	SA-p vs SA
TRINITY_DN33154_c0_g1_i1	1	2	8.07399e-60	0.263039	Upregulated	SA-p vs SA
TRINITY_DN21098_c0_g2_i2	4	2	0	0.0876797	Upregulated	SA-p vs SA
TRINITY_DN50556_c0_g1_i1	1	1	2.38934e-255	0.175359	Upregulated	SA-p vs SA
TRINITY_DN15015_c0_g2_i6	0.66	2.92	1.37087e-193	0.36347	Upregulated	SA-p vs SA
TRINITY_DN5_c0_g1_i67	1	17.7	1.28958e-20	0.538851	Upregulated	SA-p vs SA
TRINITY_DN37752_c0_g1_i1	10	5	1.74992e-77	0.0876797	Upregulated	SA-p vs SA
TRINITY_DN15947_c2_g1_i3	2	1	8.26353e-256	0.0876797	Upregulated	SA-p vs SA
TRINITY_DN4110_c0_g1_i1	6	1	4.84041e-73	-0.0512894	Downregulated	SA-p vs SA
TRINITY_DN39671_c0_g1_i1	2	1	1.50904e-44	0.0876797	Upregulated	SA-p vs SA
TRINITY_DN10566_c1_g2_i2	2	0.5	3.29962e-96	9.48712e-08	Upregulated	SA-p vs SA
TRINITY_DN46961_c0_g1_i1	8	12	1.41073e-141	0.226649	Upregulated	SA-p vs SA
TRINITY_DN14063_c0_g1_i1	1	1	1.80535e-293	0.175359	Upregulated	SA-p vs SA
TRINITY_DN41690_c0_g1_i1	5	3	2.36839e-147	0.110742	Upregulated	SA-p vs SA
TRINITY_DN21970_c0_g1_i1	1	1	1.22316e-12	0.175359	Upregulated	SA-p vs SA
TRINITY_DN13636_c0_g1_i1	2	3	4.86986e-41	0.226649	Upregulated	SA-p vs SA
TRINITY_DN1523_c0_g2_i2	5	1	1.25659e-17	-0.0282266	Downregulated	SA-p vs SA
TRINITY_DN13326_c1_g1_i1	1	1	7.79703e-109	0.175359	Upregulated	SA-p vs SA
TRINITY_DN44606_c0_g1_i1	4	2	6.37307e-52	0.0876797	Upregulated	SA-p vs SA
TRINITY_DN29396_c0_g1_i1	1	1	4.83923e-60	0.175359	Upregulated	SA-p vs SA
TRINITY_DN15015_c0_g1_i4	1.33	3.13	4.03793e-43	0.283621	Upregulated	SA-p vs SA
TRINITY_DN16125_c0_g1_i1	1	1	1.28568e-250	0.175359	Upregulated	SA-p vs SA
TRINITY_DN13880_c0_g1_i1	1	2	1.23762e-229	0.263039	Upregulated	SA-p vs SA
TRINITY_DN9189_c0_g1_i1	1	2	2.6804e-199	0.263039	Upregulated	SA-p vs SA
TRINITY_DN13701_c0_g1_i1	1	2	4.93126e-277	0.263039	Upregulated	SA-p vs SA
TRINITY_DN7260_c1_g1_i1	8	15.03	2.53311e-59	0.255128	Upregulated	SA-p vs SA
TRINITY_DN29322_c0_g1_i1	3	4	1.13744e-54	0.21175	Upregulated	SA-p vs SA
TRINITY_DN44757_c0_g1_i1	3	2	1.01148e-15	0.12407	Upregulated	SA-p vs SA
TRINITY_DN15319_c0_g1_i1	1	2	2.3088e-12	0.263039	Upregulated	SA-p vs SA
TRINITY_DN36455_c0_g1_i1	3	3	6.11315e-26	0.175359	Upregulated	SA-p vs SA
TRINITY_DN614_c0_g2_i1	7	1	0.0153481	-0.0707887	Downregulated	SA-p vs SA
TRINITY_DN121_c1_g1_i2	6.37	3.39	1.76502e-288	0.0955702	Upregulated	SA-p vs SA
TRINITY_DN19645_c3_g1_i4	6	9	2.88173e-39	0.226649	Upregulated	SA-p vs SA
TRINITY_DN13430_c3_g1_i1	1	1	2.22248e-33	0.175359	Upregulated	SA-p vs SA
TRINITY_DN34984_c0_g1_i1	1	1	1.08822e-11	0.175359	Upregulated	SA-p vs SA
TRINITY_DN27348_c0_g1_i1	5	1	6.53681e-15	-0.0282266	Downregulated	SA-p vs SA
TRINITY_DN15015_c0_g2_i2	1	1	1.59697e-51	0.175359	Upregulated	SA-p vs SA
TRINITY_DN10071_c0_g1_i2	8	11	1.82307e-133	0.215642	Upregulated	SA-p vs SA
TRINITY_DN41190_c0_g1_i1	2	6	0.00607118	0.314329	Upregulated	SA-p vs SA
TRINITY_DN15490_c0_g1_i1	3	3	2.51553e-28	0.175359	Upregulated	SA-p vs SA
TRINITY_DN48158_c0_g1_i1	1	1	3.23544e-12	0.175359	Upregulated	SA-p vs SA
TRINITY_DN11104_c0_g1_i1	1	2	0.000197693	0.263039	Upregulated	SA-p vs SA
TRINITY_DN51273_c0_g1_i1	3	3	5.09565e-40	0.175359	Upregulated	SA-p vs SA
TRINITY_DN25927_c0_g1_i4	7	10	7.77611e-21	0.220477	Upregulated	SA-p vs SA
TRINITY_DN328_c0_g5_i1	1	3	5.5946e-163	0.314328	Upregulated	SA-p vs SA
TRINITY_DN27399_c0_g1_i1	2	1	2.86057e-20	0.0876797	Upregulated	SA-p vs SA
TRINITY_DN3089_c0_g1_i2	8	7	4.55963e-205	0.158468	Upregulated	SA-p vs SA
TRINITY_DN11169_c0_g1_i3	6	7.45	1.13402e-51	0.20274	Upregulated	SA-p vs SA
TRINITY_DN10027_c0_g1_i1	3	3	0.0173117	0.175359	Upregulated	SA-p vs SA
TRINITY_DN6627_c0_g1_i1	1	1	1.13712e-28	0.175359	Upregulated	SA-p vs SA
TRINITY_DN15015_c0_g1_i2	6.67	5.87	5.2704e-30	0.159198	Upregulated	SA-p vs SA
TRINITY_DN20584_c0_g1_i1	2	3	5.59918e-45	0.226649	Upregulated	SA-p vs SA
TRINITY_DN8471_c0_g1_i2	5.47	2	6.03101e-11	0.0480887	Upregulated	SA-p vs SA
TRINITY_DN41611_c0_g1_i1	2	9	3.25942e-11	0.365618	Upregulated	SA-p vs SA
TRINITY_DN24190_c0_g1_i1	7	8	4.22639e-06	0.192251	Upregulated	SA-p vs SA
TRINITY_DN195_c1_g1_i1	1	1	1.13999e-99	0.175359	Upregulated	SA-p vs SA
TRINITY_DN19645_c0_g1_i11	3	6	0.048953	0.263039	Upregulated	SA-p vs SA
TRINITY_DN15017_c0_g2_i1	3	1	2.18881e-31	0.0363904	Upregulated	SA-p vs SA
TRINITY_DN30886_c0_g1_i1	1	2	1.28577e-230	0.263039	Upregulated	SA-p vs SA
TRINITY_DN32696_c0_g1_i1	1	1	1.61285e-175	0.175359	Upregulated	SA-p vs SA
TRINITY_DN23855_c0_g2_i1	2	3	1.03011e-293	0.226649	Upregulated	SA-p vs SA
TRINITY_DN624_c0_g3_i1	4	3	4.8108e-10	0.138969	Upregulated	SA-p vs SA
TRINITY_DN42114_c0_g1_i1	8	5	2.59759e-15	0.115906	Upregulated	SA-p vs SA
TRINITY_DN25587_c1_g1_i1	1	1	4.16162e-70	0.175359	Upregulated	SA-p vs SA
TRINITY_DN23359_c0_g1_i2	1	1	1.11531e-28	0.175359	Upregulated	SA-p vs SA
TRINITY_DN14994_c0_g1_i1	3	1	0.00015565	0.0363904	Upregulated	SA-p vs SA
TRINITY_DN18306_c0_g1_i1	2	1	2.35517e-34	0.0876797	Upregulated	SA-p vs SA
TRINITY_DN27336_c0_g1_i1	3	1	3.88432e-250	0.0363904	Upregulated	SA-p vs SA
TRINITY_DN9724_c0_g1_i2	1	1	1.88773e-200	0.175359	Upregulated	SA-p vs SA
TRINITY_DN48237_c0_g1_i1	8	7	1.44558e-149	0.158468	Upregulated	SA-p vs SA
TRINITY_DN15766_c0_g1_i1	2	1	1.22522e-165	0.0876797	Upregulated	SA-p vs SA
TRINITY_DN28677_c0_g1_i1	3	3	0.00057344	0.175359	Upregulated	SA-p vs SA
TRINITY_DN1796_c0_g2_i1	3	4	3.15946e-216	0.21175	Upregulated	SA-p vs SA
TRINITY_DN33428_c0_g1_i1	2	1	1.09715e-150	0.0876797	Upregulated	SA-p vs SA
TRINITY_DN30230_c0_g1_i1	9	5	5.85497e-31	0.101007	Upregulated	SA-p vs SA
TRINITY_DN1523_c0_g1_i1	3	5	5.73585e-24	0.239976	Upregulated	SA-p vs SA
TRINITY_DN1853_c0_g1_i1	4	10	2.75918e-56	0.291266	Upregulated	SA-p vs SA
TRINITY_DN37318_c0_g1_i1	2	3	3.03407e-11	0.226649	Upregulated	SA-p vs SA
TRINITY_DN5688_c0_g1_i5	3	1	3.52253e-30	0.0363904	Upregulated	SA-p vs SA
TRINITY_DN49568_c0_g1_i1	1	1	7.25403e-285	0.175359	Upregulated	SA-p vs SA
TRINITY_DN13819_c0_g1_i1	2	2	2.08488e-20	0.175359	Upregulated	SA-p vs SA
TRINITY_DN3109_c0_g1_i1	9	1	1.26833e-12	-0.102579	Downregulated	SA-p vs SA
TRINITY_DN11294_c0_g1_i1	6	1	2.40717e-66	-0.0512894	Downregulated	SA-p vs SA
TRINITY_DN9879_c0_g1_i1	10	8	3.0106e-18	0.147133	Upregulated	SA-p vs SA
TRINITY_DN5_c0_g1_i28	2.42	10.41	3.51694e-145	0.359916	Upregulated	SA-p vs SA
TRINITY_DN39372_c0_g1_i1	1	1	6.18382e-80	0.175359	Upregulated	SA-p vs SA
TRINITY_DN22111_c0_g1_i3	3	2	4.33762e-31	0.12407	Upregulated	SA-p vs SA
TRINITY_DN38770_c0_g1_i1	2	3	6.84518e-295	0.226649	Upregulated	SA-p vs SA
TRINITY_DN36109_c0_g1_i1	2	3	2.66509e-170	0.226649	Upregulated	SA-p vs SA
TRINITY_DN45770_c0_g1_i1	1	2	1.34241e-77	0.263039	Upregulated	SA-p vs SA
TRINITY_DN41639_c0_g1_i1	1	3	9.1596e-06	0.314328	Upregulated	SA-p vs SA
TRINITY_DN33056_c0_g1_i1	6	3	1.79596e-53	0.0876797	Upregulated	SA-p vs SA
TRINITY_DN11647_c0_g1_i1	3	12	9.55611e-17	0.350719	Upregulated	SA-p vs SA
TRINITY_DN23921_c0_g1_i1	1	1	1.307e-20	0.175359	Upregulated	SA-p vs SA
TRINITY_DN128_c4_g1_i1	9	1	2.18566e-29	-0.102579	Downregulated	SA-p vs SA
TRINITY_DN31184_c0_g1_i1	4	5	4.3079e-30	0.203586	Upregulated	SA-p vs SA
TRINITY_DN52099_c0_g1_i1	3	2	1.49383e-23	0.12407	Upregulated	SA-p vs SA
TRINITY_DN21599_c0_g1_i1	4	4	3.49284e-52	0.175359	Upregulated	SA-p vs SA
TRINITY_DN46840_c0_g1_i1	3	9	0.023845	0.314329	Upregulated	SA-p vs SA
TRINITY_DN4252_c0_g1_i1	6	5	3.61715e-96	0.152297	Upregulated	SA-p vs SA
TRINITY_DN704_c0_g1_i1	1	4	7.57792e-07	0.350719	Upregulated	SA-p vs SA
TRINITY_DN43527_c0_g1_i1	1	5	1.1088e-121	0.378945	Upregulated	SA-p vs SA
TRINITY_DN17247_c0_g1_i1	1	1	2.79569e-27	0.175359	Upregulated	SA-p vs SA
TRINITY_DN54303_c0_g1_i1	2	1	2.91983e-154	0.0876797	Upregulated	SA-p vs SA
TRINITY_DN54307_c0_g1_i1	1	1	4.90961e-285	0.175359	Upregulated	SA-p vs SA
TRINITY_DN38264_c0_g1_i1	1	1	2.20194e-20	0.175359	Upregulated	SA-p vs SA
TRINITY_DN17820_c0_g1_i1	1	1	7.75692e-29	0.175359	Upregulated	SA-p vs SA
TRINITY_DN48213_c0_g1_i1	2	3	8.99544e-51	0.226649	Upregulated	SA-p vs SA
TRINITY_DN52494_c0_g1_i1	2	7	5.17609e-24	0.333828	Upregulated	SA-p vs SA
TRINITY_DN1523_c0_g2_i6	4	10	1.43022e-09	0.291266	Upregulated	SA-p vs SA
TRINITY_DN5285_c0_g2_i2	4	3	2.41275e-108	0.138969	Upregulated	SA-p vs SA
TRINITY_DN27497_c0_g1_i1	1	4	1.6256e-59	0.350719	Upregulated	SA-p vs SA
TRINITY_DN27552_c0_g1_i1	5	4	0.00265305	0.147133	Upregulated	SA-p vs SA
TRINITY_DN46005_c0_g1_i1	3	1	7.66447e-28	0.0363904	Upregulated	SA-p vs SA
TRINITY_DN49163_c0_g1_i1	1	5	0.0139512	0.378945	Upregulated	SA-p vs SA
TRINITY_DN51944_c0_g1_i1	2	1	1.59503e-15	0.0876797	Upregulated	SA-p vs SA
TRINITY_DN17303_c0_g2_i1	4	3	0.0143062	0.138969	Upregulated	SA-p vs SA
TRINITY_DN21681_c0_g1_i1	1	1	1.59477e-19	0.175359	Upregulated	SA-p vs SA
TRINITY_DN25240_c0_g1_i1	7	9	1.28088e-33	0.207149	Upregulated	SA-p vs SA
TRINITY_DN5153_c0_g3_i1	4	3	4.52569e-245	0.138969	Upregulated	SA-p vs SA
TRINITY_DN17534_c0_g1_i1	6	8	1.76102e-290	0.21175	Upregulated	SA-p vs SA
TRINITY_DN46729_c0_g1_i1	1	8	8.15841e-172	0.438399	Upregulated	SA-p vs SA
TRINITY_DN38734_c0_g1_i1	4	1	1.22926e-233	0	Nonsignificant	SA-p vs SA
TRINITY_DN22966_c0_g1_i1	1	1	1.65801e-203	0.175359	Upregulated	SA-p vs SA
TRINITY_DN40866_c0_g1_i1	2	6	2.27836e-237	0.314329	Upregulated	SA-p vs SA
TRINITY_DN50879_c0_g1_i1	1	1	1.42164e-10	0.175359	Upregulated	SA-p vs SA
TRINITY_DN40107_c0_g1_i1	2	1	9.1417e-110	0.0876797	Upregulated	SA-p vs SA
TRINITY_DN20377_c0_g1_i1	1.63	2	1.04252e-245	0.201236	Upregulated	SA-p vs SA
TRINITY_DN37522_c0_g1_i1	1	1	8.89425e-242	0.175359	Upregulated	SA-p vs SA
TRINITY_DN12180_c0_g1_i1	3	2	2.44005e-193	0.12407	Upregulated	SA-p vs SA
TRINITY_DN26950_c0_g1_i1	4	1	9.21685e-83	0	Nonsignificant	SA-p vs SA
TRINITY_DN36769_c0_g1_i1	6	3	4.54702e-62	0.0876797	Upregulated	SA-p vs SA
TRINITY_DN5208_c0_g1_i1	1	2	0	0.263039	Upregulated	SA-p vs SA
TRINITY_DN22556_c0_g1_i1	1	1	5.45221e-16	0.175359	Upregulated	SA-p vs SA
TRINITY_DN38420_c0_g1_i1	1	2	5.36129e-30	0.263039	Upregulated	SA-p vs SA
TRINITY_DN14618_c0_g1_i1	4	2.88	9.07606e-20	0.133805	Upregulated	SA-p vs SA
TRINITY_DN47829_c0_g1_i1	1	1	5.37528e-85	0.175359	Upregulated	SA-p vs SA
TRINITY_DN15788_c0_g1_i1	1	1	7.66526e-16	0.175359	Upregulated	SA-p vs SA
TRINITY_DN5285_c0_g1_i1	1	2	1.17118e-12	0.263039	Upregulated	SA-p vs SA
TRINITY_DN47112_c0_g1_i1	5	10	6.09387e-07	0.263039	Upregulated	SA-p vs SA
TRINITY_DN41056_c0_g1_i1	1	1	6.85812e-25	0.175359	Upregulated	SA-p vs SA
TRINITY_DN51605_c0_g1_i1	3	2	9.28004e-20	0.12407	Upregulated	SA-p vs SA
TRINITY_DN10816_c0_g2_i1	4	2	0.00125538	0.0876797	Upregulated	SA-p vs SA
TRINITY_DN49022_c0_g1_i1	2	2	1.52717e-98	0.175359	Upregulated	SA-p vs SA
TRINITY_DN46546_c0_g1_i1	4	9	3.38042e-232	0.277938	Upregulated	SA-p vs SA
TRINITY_DN11817_c0_g1_i1	1	8	5.52441e-37	0.438399	Upregulated	SA-p vs SA
TRINITY_DN10279_c0_g1_i1	4	1	2.46681e-77	0	Nonsignificant	SA-p vs SA
TRINITY_DN13866_c0_g1_i1	5	8.33	6.71058e-27	0.239926	Upregulated	SA-p vs SA
TRINITY_DN33136_c0_g1_i1	1	2	2.51695e-06	0.263039	Upregulated	SA-p vs SA
TRINITY_DN43462_c0_g1_i1	1	1	7.96223e-88	0.175359	Upregulated	SA-p vs SA
TRINITY_DN36192_c0_g1_i1	2	2	0.000421961	0.175359	Upregulated	SA-p vs SA
TRINITY_DN46292_c0_g1_i1	10	21	2.8254e-09	0.269211	Upregulated	SA-p vs SA
TRINITY_DN19918_c0_g3_i1	1	1	4.00215e-138	0.175359	Upregulated	SA-p vs SA
TRINITY_DN16944_c0_g1_i1	1	1	6.40284e-69	0.175359	Upregulated	SA-p vs SA
TRINITY_DN20332_c0_g2_i1	9	16	2.47647e-25	0.24814	Upregulated	SA-p vs SA
TRINITY_DN12088_c0_g1_i1	3	1	1.64928e-223	0.0363904	Upregulated	SA-p vs SA
TRINITY_DN17303_c0_g1_i1	1	3	3.16028e-26	0.314328	Upregulated	SA-p vs SA
TRINITY_DN14555_c0_g2_i1	5	9	1.36262e-15	0.249712	Upregulated	SA-p vs SA
TRINITY_DN32671_c0_g1_i1	5	4	2.06165e-79	0.147133	Upregulated	SA-p vs SA
TRINITY_DN19081_c0_g1_i1	3	4	0.00931543	0.21175	Upregulated	SA-p vs SA
TRINITY_DN7271_c0_g1_i1	7	2	1.62714e-39	0.016891	Upregulated	SA-p vs SA
TRINITY_DN34296_c0_g1_i1	1	1	6.10839e-29	0.175359	Upregulated	SA-p vs SA
TRINITY_DN36084_c0_g1_i1	8	19	1.32759e-108	0.284777	Upregulated	SA-p vs SA
TRINITY_DN25847_c0_g1_i1	6	10	9.1596e-06	0.239976	Upregulated	SA-p vs SA
TRINITY_DN13763_c0_g1_i2	2	1	1.79596e-53	0.0876797	Upregulated	SA-p vs SA
TRINITY_DN43419_c0_g1_i1	1	2	9.55611e-17	0.263039	Upregulated	SA-p vs SA
TRINITY_DN37606_c0_g1_i1	9	7	1.307e-20	0.143569	Upregulated	SA-p vs SA
TRINITY_DN14635_c0_g1_i1	1	2	2.18566e-29	0.263039	Upregulated	SA-p vs SA
TRINITY_DN19943_c0_g1_i1	3	2	4.3079e-30	0.12407	Upregulated	SA-p vs SA
TRINITY_DN19262_c0_g1_i1	2	1	1.32812e-12	0.0876797	Upregulated	SA-p vs SA
TRINITY_DN43316_c0_g1_i1	2	2	1.88831e-142	0.175359	Upregulated	SA-p vs SA
TRINITY_DN40095_c0_g1_i1	1	3	2.10115e-74	0.314328	Upregulated	SA-p vs SA
TRINITY_DN19360_c0_g1_i1	2	1	4.33104e-18	0.0876797	Upregulated	SA-p vs SA
TRINITY_DN29577_c0_g1_i1	3	1	2.34453e-13	0.0363904	Upregulated	SA-p vs SA
TRINITY_DN5285_c0_g1_i5	1	8	3.89639e-50	0.438399	Upregulated	SA-p vs SA
TRINITY_DN33867_c0_g1_i1	2	2	9.02819e-29	0.175359	Upregulated	SA-p vs SA
TRINITY_DN50689_c0_g1_i1	1	3	2.81292e-24	0.314328	Upregulated	SA-p vs SA
TRINITY_DN43971_c0_g1_i1	3	6	8.36967e-21	0.263039	Upregulated	SA-p vs SA
TRINITY_DN46425_c0_g1_i1	1	1	3.09211e-16	0.175359	Upregulated	SA-p vs SA
TRINITY_DN1523_c0_g1_i4	4	2	1.24369e-05	0.0876797	Upregulated	SA-p vs SA
TRINITY_DN15342_c0_g1_i1	1	1	1.27256e-09	0.175359	Upregulated	SA-p vs SA
TRINITY_DN52335_c0_g1_i1	3	4	4.61023e-44	0.21175	Upregulated	SA-p vs SA
TRINITY_DN599_c0_g1_i2	5.46	12.8	3.02077e-206	0.283133	Upregulated	SA-p vs SA
TRINITY_DN20532_c0_g1_i1	1	2	6.5362e-285	0.263039	Upregulated	SA-p vs SA
TRINITY_DN36319_c0_g1_i1	4	3	6.20657e-75	0.138969	Upregulated	SA-p vs SA
TRINITY_DN54219_c0_g1_i1	1	1	1.09609e-49	0.175359	Upregulated	SA-p vs SA
TRINITY_DN3420_c0_g3_i1	4	3	1.53567e-238	0.138969	Upregulated	SA-p vs SA
TRINITY_DN3421_c0_g2_i5	0.18	2.05	1.88102e-18	0.483076	Upregulated	SA-p vs SA
TRINITY_DN8978_c0_g2_i1	1	3	1.30016e-26	0.314328	Upregulated	SA-p vs SA
TRINITY_DN32448_c0_g1_i1	1	1	1.3518e-25	0.175359	Upregulated	SA-p vs SA
TRINITY_DN31169_c0_g1_i1	1	2	4.66898e-61	0.263039	Upregulated	SA-p vs SA
TRINITY_DN8863_c0_g2_i1	1	1	2.54877e-05	0.175359	Upregulated	SA-p vs SA
TRINITY_DN10071_c0_g2_i1	2	2	1.08823e-236	0.175359	Upregulated	SA-p vs SA
TRINITY_DN27741_c0_g1_i1	4	1	1.98441e-74	0	Nonsignificant	SA-p vs SA
TRINITY_DN18182_c1_g1_i2	1	1	3.31685e-65	0.175359	Upregulated	SA-p vs SA
TRINITY_DN14616_c0_g1_i1	2	3	1.44864e-101	0.226649	Upregulated	SA-p vs SA
TRINITY_DN24030_c0_g1_i1	1	1	1.15542e-82	0.175359	Upregulated	SA-p vs SA
TRINITY_DN19645_c0_g1_i13	2	2	2.26239e-135	0.175359	Upregulated	SA-p vs SA
TRINITY_DN39758_c0_g1_i1	2	3	1.63112e-39	0.226649	Upregulated	SA-p vs SA
TRINITY_DN26821_c0_g1_i1	1	4	1.97236e-69	0.350719	Upregulated	SA-p vs SA
TRINITY_DN14712_c0_g1_i2	1	2	5.25459e-56	0.263039	Upregulated	SA-p vs SA
TRINITY_DN2257_c0_g1_i4	1	2	3.8279e-57	0.263039	Upregulated	SA-p vs SA
TRINITY_DN46356_c0_g1_i1	1	4	8.90397e-15	0.350719	Upregulated	SA-p vs SA
TRINITY_DN32573_c0_g1_i1	2	1	1.83446e-103	0.0876797	Upregulated	SA-p vs SA
TRINITY_DN46443_c0_g1_i1	1	1	0.000857787	0.175359	Upregulated	SA-p vs SA
TRINITY_DN16202_c0_g1_i1	2	1	1.42632e-18	0.0876797	Upregulated	SA-p vs SA
TRINITY_DN17123_c0_g1_i1	1	1	4.17025e-05	0.175359	Upregulated	SA-p vs SA
TRINITY_DN39322_c0_g1_i1	4	1	1.65417e-07	0	Nonsignificant	SA-p vs SA
TRINITY_DN47940_c0_g1_i1	1	1	2.53241e-21	0.175359	Upregulated	SA-p vs SA
TRINITY_DN41114_c0_g1_i1	4	2	9.38761e-145	0.0876797	Upregulated	SA-p vs SA
TRINITY_DN5793_c0_g2_i1	7	1	0.000672116	-0.0707887	Downregulated	SA-p vs SA
TRINITY_DN37374_c0_g1_i1	1	1	1.83661e-147	0.175359	Upregulated	SA-p vs SA
TRINITY_DN46328_c0_g1_i1	1	2	4.40118e-63	0.263039	Upregulated	SA-p vs SA
TRINITY_DN37995_c0_g1_i1	2	2	7.79147e-78	0.175359	Upregulated	SA-p vs SA
TRINITY_DN41047_c0_g1_i1	1	1	6.03372e-40	0.175359	Upregulated	SA-p vs SA
TRINITY_DN52509_c0_g1_i1	2	1	9.54689e-38	0.0876797	Upregulated	SA-p vs SA
TRINITY_DN29110_c0_g1_i1	1	2	2.87803e-74	0.263039	Upregulated	SA-p vs SA
TRINITY_DN18213_c0_g1_i1	1	4	8.29238e-202	0.350719	Upregulated	SA-p vs SA
TRINITY_DN43175_c0_g1_i1	4	5	1.13524e-149	0.203586	Upregulated	SA-p vs SA
TRINITY_DN42916_c0_g1_i1	2	2	1.17412e-153	0.175359	Upregulated	SA-p vs SA
TRINITY_DN22636_c0_g1_i1	4	3	1.75375e-24	0.138969	Upregulated	SA-p vs SA
TRINITY_DN13932_c0_g1_i1	1	1	4.83093e-144	0.175359	Upregulated	SA-p vs SA
TRINITY_DN47267_c0_g1_i1	2	1	1.61713e-15	0.0876797	Upregulated	SA-p vs SA
TRINITY_DN1523_c0_g1_i2	7	10.47	4.67721e-14	0.226287	Upregulated	SA-p vs SA
TRINITY_DN22323_c0_g2_i1	1	1	1.35626e-21	0.175359	Upregulated	SA-p vs SA
TRINITY_DN45577_c0_g1_i1	1	1	1.0689e-59	0.175359	Upregulated	SA-p vs SA
TRINITY_DN24346_c0_g1_i1	2	1	7.1922e-36	0.0876797	Upregulated	SA-p vs SA
TRINITY_DN16_c0_g1_i2	10	1	4.1542e-16	-0.115906	Downregulated	SA-p vs SA
TRINITY_DN1846_c0_g2_i1	1	1	2.28608e-66	0.175359	Upregulated	SA-p vs SA
TRINITY_DN37395_c0_g1_i1	2	1	7.32052e-147	0.0876797	Upregulated	SA-p vs SA
TRINITY_DN7230_c0_g1_i7	10.44	9.01	1.33121e-06	0.156726	Upregulated	SA-p vs SA
TRINITY_DN47736_c0_g1_i1	1	5	9.9007e-15	0.378945	Upregulated	SA-p vs SA
TRINITY_DN14732_c0_g1_i1	2	1	0.0120982	0.0876797	Upregulated	SA-p vs SA
TRINITY_DN10401_c0_g1_i1	1	2	6.09387e-07	0.263039	Upregulated	SA-p vs SA
TRINITY_DN41013_c0_g1_i1	1	2	1.40211e-12	0.263039	Upregulated	SA-p vs SA
TRINITY_DN50372_c0_g1_i1	3	7	2.08962e-88	0.282538	Upregulated	SA-p vs SA
TRINITY_DN43257_c0_g1_i1	3	2	5.99426e-64	0.12407	Upregulated	SA-p vs SA
TRINITY_DN15605_c0_g2_i1	7	17	3.70978e-162	0.287599	Upregulated	SA-p vs SA
TRINITY_DN46018_c0_g1_i1	5	3	1.19683e-12	0.110742	Upregulated	SA-p vs SA
TRINITY_DN51189_c0_g1_i1	5	3	4.03391e-09	0.110742	Upregulated	SA-p vs SA
TRINITY_DN39248_c0_g1_i1	2	1	1.30339e-230	0.0876797	Upregulated	SA-p vs SA
TRINITY_DN52336_c0_g1_i1	3	1	1.2521e-144	0.0363904	Upregulated	SA-p vs SA
TRINITY_DN41291_c0_g1_i1	6	7	1.37065e-09	0.194859	Upregulated	SA-p vs SA
TRINITY_DN46726_c0_g1_i1	6	10	7.45732e-05	0.239976	Upregulated	SA-p vs SA
TRINITY_DN49434_c0_g1_i1	1	1	3.42679e-240	0.175359	Upregulated	SA-p vs SA
TRINITY_DN9096_c0_g1_i1	8	4	4.28377e-42	0.0876797	Upregulated	SA-p vs SA
TRINITY_DN34868_c0_g1_i1	2	1	1.00607e-46	0.0876797	Upregulated	SA-p vs SA
TRINITY_DN36416_c0_g1_i1	1	3	9.56644e-77	0.314328	Upregulated	SA-p vs SA
TRINITY_DN278_c0_g1_i3	0.08	1	6.61205e-48	0.49485	Upregulated	SA-p vs SA
TRINITY_DN46874_c0_g1_i1	1	1	1.02771e-53	0.175359	Upregulated	SA-p vs SA
TRINITY_DN20210_c0_g1_i1	1	1	3.38308e-69	0.175359	Upregulated	SA-p vs SA
TRINITY_DN15814_c0_g1_i1	4	1	7.74103e-79	0	Nonsignificant	SA-p vs SA
TRINITY_DN8978_c0_g1_i1	2	6	1.98565e-113	0.314329	Upregulated	SA-p vs SA
TRINITY_DN37635_c0_g1_i1	7	6	3.68117e-30	0.15586	Upregulated	SA-p vs SA
TRINITY_DN47220_c0_g1_i1	3	1	0.000857787	0.0363904	Upregulated	SA-p vs SA
TRINITY_DN9830_c0_g1_i5	1	2	3.11547e-171	0.263039	Upregulated	SA-p vs SA
TRINITY_DN49066_c0_g1_i1	2	5	6.03101e-11	0.291266	Upregulated	SA-p vs SA
TRINITY_DN19936_c1_g1_i1	1	2	6.28123e-23	0.263039	Upregulated	SA-p vs SA
TRINITY_DN44147_c0_g1_i1	1	1	3.00787e-92	0.175359	Upregulated	SA-p vs SA
TRINITY_DN12872_c0_g1_i1	3	5	4.26991e-61	0.239976	Upregulated	SA-p vs SA
TRINITY_DN19146_c0_g1_i1	3	2	0.00237953	0.12407	Upregulated	SA-p vs SA
TRINITY_DN7016_c2_g1_i1	1	2	8.28855e-24	0.263039	Upregulated	SA-p vs SA
TRINITY_DN15123_c0_g1_i1	4	11	5.82322e-22	0.303322	Upregulated	SA-p vs SA
TRINITY_DN28204_c0_g1_i1	2	3	3.59921e-15	0.226649	Upregulated	SA-p vs SA
TRINITY_DN36541_c0_g1_i1	3	5	1.71694e-167	0.239976	Upregulated	SA-p vs SA
TRINITY_DN52081_c0_g1_i1	2	1	4.11516e-192	0.0876797	Upregulated	SA-p vs SA
TRINITY_DN47587_c0_g1_i1	1	1	1.11582e-159	0.175359	Upregulated	SA-p vs SA
TRINITY_DN46014_c0_g1_i1	1	5	2.13619e-138	0.378945	Upregulated	SA-p vs SA
TRINITY_DN15015_c1_g1_i1	2	2	2.5571e-54	0.175359	Upregulated	SA-p vs SA
TRINITY_DN42751_c0_g1_i1	5	8	3.36091e-08	0.234813	Upregulated	SA-p vs SA
TRINITY_DN10535_c0_g1_i1	2	1	2.35357e-34	0.0876797	Upregulated	SA-p vs SA
TRINITY_DN9830_c0_g2_i1	0.04	2.23	4.91055e-159	0.683978	Upregulated	SA-p vs SA
TRINITY_DN28252_c0_g1_i1	4	2	9.80101e-33	0.0876797	Upregulated	SA-p vs SA
TRINITY_DN188_c0_g4_i1	4	4	1.79395e-204	0.175359	Upregulated	SA-p vs SA
TRINITY_DN1389_c0_g1_i2	5.6	11.31	1.52711e-259	0.264275	Upregulated	SA-p vs SA
TRINITY_DN11776_c0_g1_i1	2	2	7.46027e-149	0.175359	Upregulated	SA-p vs SA
TRINITY_DN28656_c0_g1_i1	1	1	6.63552e-102	0.175359	Upregulated	SA-p vs SA
TRINITY_DN251_c0_g1_i1	2	4	2.97202e-211	0.263039	Upregulated	SA-p vs SA
TRINITY_DN27845_c0_g1_i1	2	2	3.15627e-201	0.175359	Upregulated	SA-p vs SA
TRINITY_DN1389_c0_g1_i3	4.02	16.97	8.16516e-214	0.357533	Upregulated	SA-p vs SA
TRINITY_DN16853_c0_g2_i1	1	1	1.64126e-201	0.175359	Upregulated	SA-p vs SA
TRINITY_DN17163_c0_g2_i1	2	2	0.0101133	0.175359	Upregulated	SA-p vs SA
TRINITY_DN52510_c0_g1_i1	1	1	8.26382e-55	0.175359	Upregulated	SA-p vs SA
TRINITY_DN41137_c0_g1_i1	1	1	6.71019e-167	0.175359	Upregulated	SA-p vs SA
TRINITY_DN9830_c2_g1_i1	1	5	1.40713e-87	0.378945	Upregulated	SA-p vs SA
TRINITY_DN13790_c0_g1_i1	1	1	5.90087e-210	0.175359	Upregulated	SA-p vs SA
TRINITY_DN12683_c0_g2_i1	1	1	1.08049e-306	0.175359	Upregulated	SA-p vs SA
TRINITY_DN46173_c0_g1_i1	2	4	8.73108e-147	0.263039	Upregulated	SA-p vs SA
TRINITY_DN49688_c0_g1_i1	3	3	2.13019e-192	0.175359	Upregulated	SA-p vs SA
TRINITY_DN6358_c0_g1_i2	1	3	6.49656e-272	0.314328	Upregulated	SA-p vs SA
TRINITY_DN12537_c0_g1_i1	1	1	1.84611e-137	0.175359	Upregulated	SA-p vs SA
TRINITY_DN19132_c0_g1_i1	3	2	1.58078e-224	0.12407	Upregulated	SA-p vs SA
TRINITY_DN22260_c0_g1_i1	1	1	6.85812e-25	0.175359	Upregulated	SA-p vs SA
TRINITY_DN7393_c0_g1_i1	2	1	1.14762e-05	0.0876797	Upregulated	SA-p vs SA
TRINITY_DN20286_c1_g1_i1	2	5	0.0140563	0.291266	Upregulated	SA-p vs SA
TRINITY_DN23986_c0_g1_i2	7	6	3.82233e-48	0.15586	Upregulated	SA-p vs SA
TRINITY_DN32577_c0_g1_i1	1	2	3.93272e-121	0.263039	Upregulated	SA-p vs SA
TRINITY_DN25116_c0_g1_i1	1	2	6.52397e-76	0.263039	Upregulated	SA-p vs SA
TRINITY_DN48002_c0_g1_i1	3	2	4.53083e-274	0.12407	Upregulated	SA-p vs SA
TRINITY_DN33217_c0_g1_i1	8	6	9.34448e-284	0.138969	Upregulated	SA-p vs SA
TRINITY_DN37014_c0_g1_i1	2	3	9.14307e-81	0.226649	Upregulated	SA-p vs SA
TRINITY_DN11832_c0_g2_i4	2.6	0.28	3.50831e-161	-0.106532	Downregulated	SA-p vs SA
TRINITY_DN3957_c0_g1_i1	2	3	3.89268e-167	0.226649	Upregulated	SA-p vs SA
TRINITY_DN20160_c0_g1_i1	2	2	7.99642e-87	0.175359	Upregulated	SA-p vs SA
TRINITY_DN17374_c0_g1_i1	3	6	3.43414e-146	0.263039	Upregulated	SA-p vs SA
TRINITY_DN39635_c0_g1_i1	1	1	1.53866e-33	0.175359	Upregulated	SA-p vs SA
TRINITY_DN11236_c0_g1_i2	1	1	1.46287e-229	0.175359	Upregulated	SA-p vs SA
TRINITY_DN30339_c0_g1_i1	7	1	4.13029e-232	-0.0707887	Downregulated	SA-p vs SA
TRINITY_DN13287_c0_g1_i1	4	4	5.22555e-247	0.175359	Upregulated	SA-p vs SA
TRINITY_DN35885_c0_g1_i1	1	7	9.72268e-255	0.421508	Upregulated	SA-p vs SA
TRINITY_DN20402_c0_g1_i1	7	14	3.62217e-07	0.263039	Upregulated	SA-p vs SA
TRINITY_DN84_c0_g1_i2	8	1	4.49302e-87	-0.0876798	Downregulated	SA-p vs SA
TRINITY_DN34166_c0_g1_i1	3	4	2.21409e-117	0.21175	Upregulated	SA-p vs SA
TRINITY_DN40455_c0_g1_i1	1	1	1.56687e-159	0.175359	Upregulated	SA-p vs SA
TRINITY_DN37338_c0_g1_i1	4	3	1.71789e-98	0.138969	Upregulated	SA-p vs SA
TRINITY_DN38752_c0_g1_i1	1	2	1.99474e-102	0.263039	Upregulated	SA-p vs SA
TRINITY_DN13713_c0_g1_i1	1	2	0	0.263039	Upregulated	SA-p vs SA
TRINITY_DN16677_c0_g1_i1	3	1	2.07461e-32	0.0363904	Upregulated	SA-p vs SA
TRINITY_DN32188_c0_g1_i1	4	2	7.67625e-54	0.0876797	Upregulated	SA-p vs SA
TRINITY_DN10816_c0_g1_i1	3	2	6.53681e-15	0.12407	Upregulated	SA-p vs SA
TRINITY_DN49312_c0_g1_i1	1	1	1.97348e-144	0.175359	Upregulated	SA-p vs SA
TRINITY_DN14618_c1_g1_i2	0.5	3	5.69742e-285	0.402008	Upregulated	SA-p vs SA
TRINITY_DN51850_c0_g1_i1	2	2	2.38767e-30	0.175359	Upregulated	SA-p vs SA
TRINITY_DN6142_c0_g1_i4	1	2	8.52426e-245	0.263039	Upregulated	SA-p vs SA
TRINITY_DN22481_c0_g1_i1	2	1	4.33104e-18	0.0876797	Upregulated	SA-p vs SA
TRINITY_DN27020_c0_g1_i1	2	2	1.45292e-29	0.175359	Upregulated	SA-p vs SA
TRINITY_DN51067_c0_g1_i1	2	1	9.17211e-40	0.0876797	Upregulated	SA-p vs SA
TRINITY_DN5648_c0_g2_i2	3	2	7.09719e-128	0.12407	Upregulated	SA-p vs SA
TRINITY_DN36931_c0_g1_i1	4	7	1.3518e-25	0.246148	Upregulated	SA-p vs SA
TRINITY_DN8224_c0_g2_i7	1	7	2.42172e-114	0.421508	Upregulated	SA-p vs SA
TRINITY_DN13855_c0_g1_i1	2	3	2.32161e-85	0.226649	Upregulated	SA-p vs SA
TRINITY_DN8571_c0_g1_i1	1	4	6.81463e-10	0.350719	Upregulated	SA-p vs SA
TRINITY_DN22600_c1_g1_i1	1	1	1.27259e-41	0.175359	Upregulated	SA-p vs SA
TRINITY_DN33838_c0_g1_i1	2	1	8.6498e-155	0.0876797	Upregulated	SA-p vs SA
TRINITY_DN15015_c0_g2_i7	1.68	6.08	2.89372e-20	0.338059	Upregulated	SA-p vs SA
TRINITY_DN36657_c0_g1_i1	1	1	5.82316e-303	0.175359	Upregulated	SA-p vs SA
TRINITY_DN19720_c0_g1_i1	2	1	3.00325e-10	0.0876797	Upregulated	SA-p vs SA
TRINITY_DN3871_c0_g2_i3	7.97	3.15	1.50908e-244	0.0579363	Upregulated	SA-p vs SA
TRINITY_DN12322_c0_g1_i1	2	3	1.59617e-58	0.226649	Upregulated	SA-p vs SA
TRINITY_DN212_c1_g1_i16	3	2	9.6986e-59	0.12407	Upregulated	SA-p vs SA
TRINITY_DN46741_c0_g1_i1	3	1	2.9012e-43	0.0363904	Upregulated	SA-p vs SA
TRINITY_DN36023_c0_g1_i1	2	1	7.54421e-263	0.0876797	Upregulated	SA-p vs SA
TRINITY_DN53795_c0_g1_i1	1	2	6.45476e-45	0.263039	Upregulated	SA-p vs SA
TRINITY_DN19762_c0_g1_i1	1	2	6.24947e-114	0.263039	Upregulated	SA-p vs SA
TRINITY_DN7127_c0_g1_i1	9	9	3.42444e-69	0.175359	Upregulated	SA-p vs SA
TRINITY_DN30920_c0_g1_i1	2	5	6.91597e-74	0.291266	Upregulated	SA-p vs SA
TRINITY_DN42246_c0_g1_i1	7	5	3.82351e-08	0.132797	Upregulated	SA-p vs SA
TRINITY_DN44954_c0_g1_i1	2	1	3.86175e-25	0.0876797	Upregulated	SA-p vs SA
TRINITY_DN13326_c2_g1_i7	1	1.19	3.6859e-169	0.197364	Upregulated	SA-p vs SA
TRINITY_DN18831_c0_g2_i1	1	1	2.07368e-38	0.175359	Upregulated	SA-p vs SA
TRINITY_DN40416_c0_g1_i1	1	1	1.33121e-06	0.175359	Upregulated	SA-p vs SA
TRINITY_DN28401_c0_g1_i1	1	1	3.61578e-69	0.175359	Upregulated	SA-p vs SA
TRINITY_DN8978_c0_g3_i1	1	9	4.54645e-26	0.453298	Upregulated	SA-p vs SA
TRINITY_DN18787_c0_g1_i1	1	3	7.39724e-25	0.314328	Upregulated	SA-p vs SA
TRINITY_DN53404_c0_g1_i1	1	1	2.40176e-10	0.175359	Upregulated	SA-p vs SA
TRINITY_DN25379_c0_g1_i1	2	4	2.03601e-91	0.263039	Upregulated	SA-p vs SA
TRINITY_DN50649_c0_g1_i1	1	1	4.01296e-110	0.175359	Upregulated	SA-p vs SA
TRINITY_DN36027_c0_g1_i1	1	2	8.36744e-81	0.263039	Upregulated	SA-p vs SA
TRINITY_DN31943_c0_g1_i1	8	18	4.32752e-27	0.277938	Upregulated	SA-p vs SA
TRINITY_DN37946_c0_g1_i1	7	9	1.49614e-55	0.207149	Upregulated	SA-p vs SA
TRINITY_DN47760_c0_g1_i1	1	1	3.14499e-253	0.175359	Upregulated	SA-p vs SA
TRINITY_DN3882_c1_g1_i2	5.05	1	6.84518e-295	-0.0294852	Downregulated	SA-p vs SA
TRINITY_DN14388_c0_g1_i1	7	10	2.66509e-170	0.220477	Upregulated	SA-p vs SA
TRINITY_DN24382_c0_g2_i1	1	14	1.34241e-77	0.509187	Upregulated	SA-p vs SA
TRINITY_DN49165_c0_g1_i1	1	1	9.1596e-06	0.175359	Upregulated	SA-p vs SA
TRINITY_DN14212_c0_g1_i1	7	5	1.79596e-53	0.132797	Upregulated	SA-p vs SA
TRINITY_DN36562_c0_g1_i1	2	1	9.55611e-17	0.0876797	Upregulated	SA-p vs SA
TRINITY_DN30503_c0_g1_i1	1	1	1.307e-20	0.175359	Upregulated	SA-p vs SA
TRINITY_DN51652_c0_g1_i1	7	11	2.18566e-29	0.232533	Upregulated	SA-p vs SA
TRINITY_DN50547_c0_g1_i1	1	3	4.3079e-30	0.314328	Upregulated	SA-p vs SA
TRINITY_DN32664_c0_g1_i1	2	3	1.32812e-12	0.226649	Upregulated	SA-p vs SA
TRINITY_DN53815_c0_g1_i1	1	2	1.88831e-142	0.263039	Upregulated	SA-p vs SA
TRINITY_DN7113_c0_g2_i1	2	4	2.10115e-74	0.263039	Upregulated	SA-p vs SA
TRINITY_DN9867_c1_g1_i1	2	2	4.33104e-18	0.175359	Upregulated	SA-p vs SA
TRINITY_DN19937_c0_g1_i1	2	1	2.34453e-13	0.0876797	Upregulated	SA-p vs SA
TRINITY_DN25466_c0_g2_i1	1	5	3.89639e-50	0.378945	Upregulated	SA-p vs SA
TRINITY_DN4252_c0_g2_i1	1	4	9.02819e-29	0.350719	Upregulated	SA-p vs SA
TRINITY_DN50165_c0_g1_i1	1	1	2.81292e-24	0.175359	Upregulated	SA-p vs SA
TRINITY_DN15652_c0_g1_i1	3	2	8.36967e-21	0.12407	Upregulated	SA-p vs SA
TRINITY_DN9830_c0_g1_i4	1.51	2.37	3.09211e-16	0.232381	Upregulated	SA-p vs SA
TRINITY_DN39425_c0_g1_i1	1	2	1.24369e-05	0.263039	Upregulated	SA-p vs SA
TRINITY_DN31101_c0_g1_i1	2	1	1.27256e-09	0.0876797	Upregulated	SA-p vs SA
TRINITY_DN6142_c1_g1_i2	6	5	4.61023e-44	0.152297	Upregulated	SA-p vs SA
TRINITY_DN6334_c0_g2_i2	1	1.99	3.02077e-206	0.262405	Upregulated	SA-p vs SA
TRINITY_DN16171_c0_g2_i1	1	1	6.5362e-285	0.175359	Upregulated	SA-p vs SA
TRINITY_DN39157_c0_g1_i1	1	1	6.20657e-75	0.175359	Upregulated	SA-p vs SA
TRINITY_DN23095_c1_g1_i1	1	1	1.09609e-49	0.175359	Upregulated	SA-p vs SA
TRINITY_DN33165_c0_g1_i2	3	1	1.53567e-238	0.0363904	Upregulated	SA-p vs SA
TRINITY_DN9830_c0_g2_i3	2.96	11.79	1.88102e-18	0.350184	Upregulated	SA-p vs SA
TRINITY_DN23173_c0_g1_i1	2	1	1.30016e-26	0.0876797	Upregulated	SA-p vs SA
TRINITY_DN23888_c0_g1_i1	2	2	1.3518e-25	0.175359	Upregulated	SA-p vs SA
TRINITY_DN34538_c0_g1_i1	9	6	4.66898e-61	0.12407	Upregulated	SA-p vs SA
TRINITY_DN9914_c0_g2_i1	7	14	2.54877e-05	0.263039	Upregulated	SA-p vs SA
TRINITY_DN45681_c0_g1_i1	8	10	1.08823e-236	0.203586	Upregulated	SA-p vs SA
TRINITY_DN38777_c0_g1_i1	3	3	5.00038e-23	0.175359	Upregulated	SA-p vs SA
TRINITY_DN52278_c0_g1_i1	1	1	1.93229e-94	0.175359	Upregulated	SA-p vs SA
TRINITY_DN38513_c0_g1_i1	1	2	2.72967e-182	0.263039	Upregulated	SA-p vs SA
TRINITY_DN2348_c0_g1_i6	7	1	1.51456e-58	-0.0707887	Downregulated	SA-p vs SA
TRINITY_DN28065_c0_g1_i1	1	2	2.70782e-184	0.263039	Upregulated	SA-p vs SA
TRINITY_DN3420_c0_g2_i1	5	7	1.64659e-216	0.217922	Upregulated	SA-p vs SA
TRINITY_DN7834_c0_g1_i1	3	3	1.52741e-15	0.175359	Upregulated	SA-p vs SA
TRINITY_DN38539_c0_g1_i1	4	6	8.15513e-134	0.226649	Upregulated	SA-p vs SA
TRINITY_DN32554_c0_g1_i1	1	1	1.3488e-153	0.175359	Upregulated	SA-p vs SA
TRINITY_DN32689_c0_g1_i1	5	14	4.49065e-13	0.305601	Upregulated	SA-p vs SA
TRINITY_DN15690_c0_g1_i1	1	2	0.00660661	0.263039	Upregulated	SA-p vs SA
TRINITY_DN3420_c0_g1_i1	1	1	2.56927e-118	0.175359	Upregulated	SA-p vs SA
TRINITY_DN19723_c0_g1_i4	1	2	1.11799e-14	0.263039	Upregulated	SA-p vs SA
TRINITY_DN42291_c0_g1_i1	4	3	1.17672e-28	0.138969	Upregulated	SA-p vs SA
TRINITY_DN18371_c0_g2_i1	2	1	0.000296643	0.0876797	Upregulated	SA-p vs SA
TRINITY_DN52504_c0_g1_i1	3	1	0.00841274	0.0363904	Upregulated	SA-p vs SA
TRINITY_DN16508_c0_g1_i1	9	8	7.45732e-05	0.16046	Upregulated	SA-p vs SA

## Sheet: Annotated-only
gene_id	SA	SA-P	Pvalue	logFC	category	condition	Uniprot-Id	Protein names	Gene Names	Pathway	Gene Ontology (biological process)	Gene Ontology (cellular component)	Gene Ontology (molecular function)	Gene Names (ORF)	Gene Names (primary)	EC number	Function [CC]	Organism	Entry Name	UniParc	Gene Ontology (GO)	Gene Ontology IDs
TRINITY_DN1262_c0_g7_i1	1	6631	4.96005e-202	1.28845	Upregulated	SA-p vs SA	ZORB_ECO24	Zorya protein ZorB	zorB EcE24377A_0284		defense response to virus [GO:0051607]	plasma membrane [GO:0005886]			zorB		FUNCTION: Component of antiviral defense system Zorya type I, composed of ZorA, ZorB, ZorC and ZorD. Expression of Zorya type I in E.coli (strain MG1655) confers 10,000-fold resistance to phage SECphi27, 100-fold resistance to lambda, and 10-fold resistance to T7. While most T7 infected Zorya-containing cells undergo abortive infection, a minority produce viable phage progeny. These eventually ac…	Escherichia coli O139:H28 (strain E24377A / ETEC)	ZORB_ECO24	UPI00005F1C46	plasma membrane [GO:0005886]; defense response to virus [GO:0051607]	GO:0005886; GO:0051607
TRINITY_DN50074_c0_g1_i1	1	18649	8.03457e-247	1.41926	Upregulated	SA-p vs SA	ZAPA_PSEAE	Cell division protein ZapA (Z ring-associated protein ZapA)	zapA PA5227		division septum assembly [GO:0000917]; FtsZ-dependent cytokinesis [GO:0043093]; septin ring assembly [GO:0000921]	cell division site [GO:0032153]; cell septum [GO:0030428]; cytosol [GO:0005829]			zapA		FUNCTION: Activator of cell division through the inhibition of FtsZ GTPase activity, therefore promoting FtsZ assembly into bundles of protofilaments necessary for the formation of the division Z ring. It is recruited early at mid-cell but it is not essential for cell division (By similarity). {ECO:0000250}.	Pseudomonas aeruginosa (strain ATCC 15692 / DSM 22644 / CIP 104116 / JCM 14847 / LMG 12228 / 1C / PRS 101 / PAO1)	ZAPA_PSEAE	UPI00000C5F64	cell division site [GO:0032153]; cell septum [GO:0030428]; cytosol [GO:0005829]; division septum assembly [GO:0000917]; FtsZ-dependent cytokinesis [GO:0043093]; septin ring assembly [GO:0000921]	GO:0000917; GO:0000921; GO:0005829; GO:0030428; GO:0032153; GO:0043093
TRINITY_DN28656_c0_g1_i1	1	1	6.63552e-102	0.175359	Upregulated	SA-p vs SA	Z804A_HUMAN	Zinc finger protein 804A	ZNF804A C2orf10		positive regulation of dendritic spine maintenance [GO:1902952]; positive regulation of gene expression [GO:0010628]; positive regulation of neuron projection development [GO:0010976]; regulation of neuron projection development [GO:0010975]	cytoplasm [GO:0005737]; dendritic microtubule [GO:1901588]; dendritic shaft [GO:0043198]; dendritic spine [GO:0043197]; growth cone [GO:0030426]; neuronal cell body [GO:0043025]; nucleus [GO:0005634]; plasma membrane [GO:0005886]; postsynapse [GO:0098794]; presynapse [GO:0098793]	metal ion binding [GO:0046872]		ZNF804A			Homo sapiens (Human)	Z804A_HUMAN	UPI00001B4B18	cytoplasm [GO:0005737]; dendritic microtubule [GO:1901588]; dendritic shaft [GO:0043198]; dendritic spine [GO:0043197]; growth cone [GO:0030426]; neuronal cell body [GO:0043025]; nucleus [GO:0005634]; plasma membrane [GO:0005886]; postsynapse [GO:0098794]; presynapse [GO:0098793]; metal ion binding [GO:0046872]; positive regulation of dendritic spine maintenance [GO:1902952]; positive regulation …	GO:0005634; GO:0005737; GO:0005886; GO:0010628; GO:0010975; GO:0010976; GO:0030426; GO:0043025; GO:0043197; GO:0043198; GO:0046872; GO:0098793; GO:0098794; GO:1901588; GO:1902952
TRINITY_DN489_c0_g1_i2	1385	1	1.95265e-49	-0.739638	Downregulated	SA-p vs SA	YYCJ_BACSU	Exodeoxyribonuclease YycJ (EC 3.1.11.-)	yycJ BSU40370				exonuclease activity [GO:0004527]; metal ion binding [GO:0046872]		yycJ	3.1.11.-	FUNCTION: 5'->3' double-stranded DNA exonuclease (By similarity). May play a role in mutation mismatch repair (MMR) (By similarity). Required for accurate coordination of cell division with DNA replication (PubMed:21169496). May play a role in cell wall metabolism (PubMed:21169496). {ECO:0000250|UniProtKB:A0A4Y1WBN6, ECO:0000269|PubMed:21169496}.	Bacillus subtilis (strain 168)	YYCJ_BACSU	UPI000195C75E	exonuclease activity [GO:0004527]; metal ion binding [GO:0046872]	GO:0004527; GO:0046872
TRINITY_DN990_c0_g2_i2	1900.67	1	2.2674e-59	-0.779674	Downregulated	SA-p vs SA	YWRF_BACSU	Uncharacterized protein YwrF	ywrF BSU36080				FMN binding [GO:0010181]; oxidoreductase activity, acting on the CH-NH group of donors, NAD or NADP as acceptor [GO:0016646]		ywrF			Bacillus subtilis (strain 168)	YWRF_BACSU	UPI0000060B5C	FMN binding [GO:0010181]; oxidoreductase activity, acting on the CH-NH group of donors, NAD or NADP as acceptor [GO:0016646]	GO:0010181; GO:0016646
TRINITY_DN950_c0_g1_i1	24156	11	6.58966e-144	-0.797944	Downregulated	SA-p vs SA	YUTJ_BACSU	NADH dehydrogenase-like protein YutJ (EC 1.6.-.-)	yutJ BSU32200				oxidoreductase activity [GO:0016491]		yutJ	1.6.-.-		Bacillus subtilis (strain 168)	YUTJ_BACSU	UPI000195C6E3	oxidoreductase activity [GO:0016491]	GO:0016491
TRINITY_DN5440_c0_g2_i7	1788.17	1.95	1.4326e-55	-0.687479	Downregulated	SA-p vs SA	YUNF_BACSU	UPF0759 protein YunF	yunF BSU32390						yunF			Bacillus subtilis (strain 168)	YUNF_BACSU	UPI000195C6EF
TRINITY_DN739_c0_g2_i12	830.1	1.98	3.29834e-34	-0.588475	Downregulated	SA-p vs SA	YTSP_BACSU	Protein YtsP	ytsP BSU29640			cytosol [GO:0005829]	L-methionine-(R)-S-oxide reductase activity [GO:0033745]		ytsP			Bacillus subtilis (strain 168)	YTSP_BACSU	UPI000195C6DB	cytosol [GO:0005829]; L-methionine-(R)-S-oxide reductase activity [GO:0033745]	GO:0005829; GO:0033745
TRINITY_DN4011_c0_g1_i1	318	1	9.42972e-18	-0.553512	Downregulated	SA-p vs SA	YQEG_BACSU	Probable phosphatase YqeG (EC 3.1.3.-)	yqeG BSU25680			cytoplasm [GO:0005737]	phosphatase activity [GO:0016791]; phosphatidylglycerophosphatase activity [GO:0008962]		yqeG	3.1.3.-	FUNCTION: Has low dephosphorylation activity on GMP and glucose-6-phosphate. {ECO:0000269|PubMed:27784292}.	Bacillus subtilis (strain 168)	YQEG_BACSU	UPI000006076D	cytoplasm [GO:0005737]; phosphatase activity [GO:0016791]; phosphatidylglycerophosphatase activity [GO:0008962]	GO:0005737; GO:0008962; GO:0016791
TRINITY_DN5487_c1_g1_i2	150.06	1	5.78702e-09	-0.458512	Downregulated	SA-p vs SA	YPJD_BACSU	Uncharacterized protein YpjD	ypjD jojD BSU22500						ypjD			Bacillus subtilis (strain 168)	YPJD_BACSU	UPI000006063B
TRINITY_DN45669_c0_g1_i1	1	4706	3.23843e-187	1.24508	Upregulated	SA-p vs SA	YOHC_ECOL6	Inner membrane protein YohC	yohC c2667			plasma membrane [GO:0005886]			yohC			Escherichia coli O6:H1 (strain CFT073 / ATCC 700928 / UPEC)	YOHC_ECOL6	UPI000013BC7F	plasma membrane [GO:0005886]	GO:0005886
TRINITY_DN3308_c0_g1_i1	383	1	2.86057e-20	-0.577038	Downregulated	SA-p vs SA	YMFH_BACSU	Uncharacterized zinc protease YmfH (EC 3.4.24.-)	ymfH BSU16860		proteolysis [GO:0006508]		metal ion binding [GO:0046872]; metallopeptidase activity [GO:0008237]		ymfH	3.4.24.-		Bacillus subtilis (strain 168)	YMFH_BACSU	UPI000195C5EB	metal ion binding [GO:0046872]; metallopeptidase activity [GO:0008237]; proteolysis [GO:0006508]	GO:0006508; GO:0008237; GO:0046872
TRINITY_DN50264_c0_g1_i1	15	13676	2.20114e-233	1.03747	Upregulated	SA-p vs SA	YID1_PSEAE	Uncharacterized protein PA5481	PA5481			periplasmic space [GO:0042597]						Pseudomonas aeruginosa (strain ATCC 15692 / DSM 22644 / CIP 104116 / JCM 14847 / LMG 12228 / 1C / PRS 101 / PAO1)	YID1_PSEAE	UPI000013B3A1	periplasmic space [GO:0042597]	GO:0042597
TRINITY_DN26284_c0_g1_i1	1	5388	4.64749e-193	1.2622	Upregulated	SA-p vs SA	YHJG_ECOLI	AsmA family protein YhjG	yhjG yhjF b3524 JW3492		regulation of protein targeting to membrane [GO:0090313]	plasma membrane [GO:0005886]			yhjG			Escherichia coli (strain K12)	YHJG_ECOLI	UPI00005EE9D4	plasma membrane [GO:0005886]; regulation of protein targeting to membrane [GO:0090313]	GO:0005886; GO:0090313
TRINITY_DN6144_c0_g2_i1	850	1	1.71427e-36	-0.67788	Downregulated	SA-p vs SA	YHFE_BACSU	Putative aminopeptidase YhfE (EC 3.4.11.-)	yhfE BSU10200		proteolysis [GO:0006508]		aminopeptidase activity [GO:0004177]; metal ion binding [GO:0046872]; metallopeptidase activity [GO:0008237]		yhfE	3.4.11.-		Bacillus subtilis (strain 168)	YHFE_BACSU	UPI0000060191	aminopeptidase activity [GO:0004177]; metal ion binding [GO:0046872]; metallopeptidase activity [GO:0008237]; proteolysis [GO:0006508]	GO:0004177; GO:0006508; GO:0008237; GO:0046872
TRINITY_DN2125_c0_g3_i1	17	17485	4.92192e-244	1.05272	Upregulated	SA-p vs SA	YGB4_CUPNE	Putative hydroxypyruvate isomerase (EC 5.3.1.22) (Glyoxylate-induced protein)			glyoxylate metabolic process [GO:0046487]		hydroxypyruvate isomerase activity [GO:0008903]			5.3.1.22	FUNCTION: Catalyzes the reversible isomerization between hydroxypyruvate and 2-hydroxy-3-oxopropanoate (also termed tartronate semialdehyde). {ECO:0000250}.	Cupriavidus necator (Alcaligenes eutrophus) (Ralstonia eutropha)	YGB4_CUPNE	UPI000013B01F	hydroxypyruvate isomerase activity [GO:0008903]; glyoxylate metabolic process [GO:0046487]	GO:0008903; GO:0046487
TRINITY_DN399_c0_g1_i1	1506	4	2.45094e-47	-0.574873	Downregulated	SA-p vs SA	YFMJ_BACSU	Putative NADP-dependent oxidoreductase YfmJ (EC 1.-.-.-)	yfmJ BSU07450		catabolic process [GO:0009056]; response to toxic substance [GO:0009636]		oxidoreductase activity, acting on the CH-CH group of donors, NAD or NADP as acceptor [GO:0016628]		yfmJ	1.-.-.-	FUNCTION: Putative quinone oxidoreductase that may contribute to the degradation of aromatic compounds. {ECO:0000305}.	Bacillus subtilis (strain 168)	YFMJ_BACSU	UPI0000060082	oxidoreductase activity, acting on the CH-CH group of donors, NAD or NADP as acceptor [GO:0016628]; catabolic process [GO:0009056]; response to toxic substance [GO:0009636]	GO:0009056; GO:0009636; GO:0016628
TRINITY_DN1264_c0_g2_i1	2536	7	3.34918e-60	-0.570005	Downregulated	SA-p vs SA	YFLS_BACSU	Putative malate transporter YflS	yflS BSU07570			plasma membrane [GO:0005886]	transmembrane transporter activity [GO:0022857]		yflS		FUNCTION: Might be a malate transporter. {ECO:0000305|PubMed:12949159}.	Bacillus subtilis (strain 168)	YFLS_BACSU	UPI000006008D	plasma membrane [GO:0005886]; transmembrane transporter activity [GO:0022857]	GO:0005886; GO:0022857
TRINITY_DN7446_c0_g1_i5	89.8	2	0.000148835	-0.305883	Downregulated	SA-p vs SA	YFKA_BACSU	Putative protein YfkA	yfkA ykfB BSU07955 BSU07950 BSU07960				4 iron, 4 sulfur cluster binding [GO:0051539]; catalytic activity [GO:0003824]; metal ion binding [GO:0046872]	BSU07950 BSU07960	yfkA			Bacillus subtilis (strain 168)	YFKA_BACSU	UPI000195C5EE	4 iron, 4 sulfur cluster binding [GO:0051539]; catalytic activity [GO:0003824]; metal ion binding [GO:0046872]	GO:0003824; GO:0046872; GO:0051539
TRINITY_DN2473_c0_g2_i4	157.33	3	2.02823e-07	-0.325528	Downregulated	SA-p vs SA	YERC_BACSU	Uncharacterized protein YerC	yerC yecD BSU06580				DNA-binding transcription factor activity [GO:0003700]; sequence-specific DNA binding [GO:0043565]		yerC			Bacillus subtilis (strain 168)	YERC_BACSU	UPI000006002C	DNA-binding transcription factor activity [GO:0003700]; sequence-specific DNA binding [GO:0043565]	GO:0003700; GO:0043565
TRINITY_DN7129_c0_g1_i1	114	2	6.58386e-06	-0.336067	Downregulated	SA-p vs SA	YCLN_BACSU	Petrobactin import system permease protein YclN	yclN BSU03800		siderophore-dependent iron import into cell [GO:0033214]	plasma membrane [GO:0005886]	transmembrane transporter activity [GO:0022857]		yclN		FUNCTION: Part of the ABC transporter complex YclNOPQ involved in uptake of ferric-petrobactin. Petrobactin is a photoreactive 3,4-catecholate siderophore produced by many members of the B.cereus group, including B.anthracis. Probably responsible for the translocation of the substrate across the membrane. {ECO:0000269|PubMed:19955416}.	Bacillus subtilis (strain 168)	YCLN_BACSU	UPI000005FF20	plasma membrane [GO:0005886]; transmembrane transporter activity [GO:0022857]; siderophore-dependent iron import into cell [GO:0033214]	GO:0005886; GO:0022857; GO:0033214
TRINITY_DN888_c0_g1_i1	1	8111	9.53115e-211	1.31394	Upregulated	SA-p vs SA	YCII_SHIFL	Protein YciI	yciI SF1254 S1340						yciI			Shigella flexneri	YCII_SHIFL	UPI000013A6C0
TRINITY_DN7156_c0_g2_i4	294.44	1	2.30313e-16	-0.543775	Downregulated	SA-p vs SA	YCIC_BACSU	Zinc chaperone YciC (EC 3.6.5.-)	yciC BSU03360				GTP binding [GO:0005525]; hydrolase activity [GO:0016787]		yciC	3.6.5.-	FUNCTION: Zinc chaperone that directly transfers zinc cofactor to target proteins, thereby activating them (By similarity). Zinc is transferred from the CXCC motif in the GTPase domain to the zinc binding site in target proteins in a process requiring GTP hydrolysis (By similarity). Contributes to optimal growth under starvation for zinc (PubMed:12426338). {ECO:0000250|UniProtKB:Q8VEH6, ECO:00002…	Bacillus subtilis (strain 168)	YCIC_BACSU	UPI000005FEF6	GTP binding [GO:0005525]; hydrolase activity [GO:0016787]	GO:0005525; GO:0016787
TRINITY_DN6029_c0_g4_i1	1	5948	2.49013e-197	1.2747	Upregulated	SA-p vs SA	YCIB_PSEAE	Inner membrane-spanning protein YciB	yciB PA3201			plasma membrane [GO:0005886]			yciB		FUNCTION: Plays a role in cell envelope biogenesis, maintenance of cell envelope integrity and membrane homeostasis. {ECO:0000255|HAMAP-Rule:MF_00189}.	Pseudomonas aeruginosa (strain ATCC 15692 / DSM 22644 / CIP 104116 / JCM 14847 / LMG 12228 / 1C / PRS 101 / PAO1)	YCIB_PSEAE	UPI000012D9CF	plasma membrane [GO:0005886]	GO:0005886
TRINITY_DN95_c0_g2_i1	8	11876	2.89227e-227	1.09913	Upregulated	SA-p vs SA	YCGR_PSEPK	Flagellar brake protein YcgR (Cyclic di-GMP binding protein YcgR)	ycgR PP_4397		bacterial-type flagellum-dependent cell motility [GO:0071973]; regulation of bacterial-type flagellum-dependent cell motility by regulation of motor speed [GO:0071945]	bacterial-type flagellum basal body [GO:0009425]	cyclic-di-GMP binding [GO:0035438]		ycgR		FUNCTION: Acts as a flagellar brake, regulating swimming and swarming in a bis-(3'-5') cyclic diguanylic acid (c-di-GMP)-dependent manner. Increasing levels of c-di-GMP lead to decreased motility (By similarity). Binds c-di-GMP with a dissociation constant of 165 nM. Binds 2 intercalated (c-di-GMP) dimers per subunit. {ECO:0000250}.	Pseudomonas putida (strain ATCC 47054 / DSM 6125 / CFBP 8728 / NCIMB 11950 / KT2440)	YCGR_PSEPK	UPI000000FA40	bacterial-type flagellum basal body [GO:0009425]; cyclic-di-GMP binding [GO:0035438]; bacterial-type flagellum-dependent cell motility [GO:0071973]; regulation of bacterial-type flagellum-dependent cell motility by regulation of motor speed [GO:0071945]	GO:0009425; GO:0035438; GO:0071945; GO:0071973
TRINITY_DN37318_c0_g1_i1	2	3	3.03407e-11	0.226649	Upregulated	SA-p vs SA	YBOX1_DANRE	Y-box-binding protein 1 (YB-1) (ZfY1) (Y-box transcription factor)	ybx1		chordate embryonic development [GO:0043009]; egg activation [GO:0007343]; embryonic morphogenesis [GO:0048598]; epidermis development [GO:0008544]; establishment of RNA localization [GO:0051236]; miRNA transport [GO:1990428]; mRNA processing [GO:0006397]; mRNA stabilization [GO:0048255]; negative regulation of cellular senescence [GO:2000773]; negative regulation of mRNA processing [GO:0050686]; …	extracellular exosome [GO:0070062]; nucleus [GO:0005634]; P-body [GO:0000932]	C5-methylcytidine-containing RNA reader activity [GO:0062153]; eukaryotic initiation factor 4E binding [GO:0008190]; methyl-CpG binding [GO:0008327]; miRNA binding [GO:0035198]; nucleic acid binding [GO:0003676]; RNA binding [GO:0003723]		ybx1		FUNCTION: DNA- and RNA-binding protein involved in various processes, such as translational repression, RNA stabilization, mRNA splicing and transcription regulation (PubMed:30135188, PubMed:31399345). Binds preferentially to the 5'-[CU]CUGCG-3' RNA motif and specifically recognizes mRNA transcripts modified by C5-methylcytosine (m5C) (PubMed:31399345). Promotes mRNA stabilization: acts by bindin…	Danio rerio (Zebrafish) (Brachydanio rerio)	YBOX1_DANRE	UPI00005681F6	extracellular exosome [GO:0070062]; nucleus [GO:0005634]; P-body [GO:0000932]; C5-methylcytidine-containing RNA reader activity [GO:0062153]; eukaryotic initiation factor 4E binding [GO:0008190]; methyl-CpG binding [GO:0008327]; miRNA binding [GO:0035198]; nucleic acid binding [GO:0003676]; RNA binding [GO:0003723]; chordate embryonic development [GO:0043009]; egg activation [GO:0007343]; embryon…	GO:0000932; GO:0001556; GO:0003676; GO:0003723; GO:0005634; GO:0006397; GO:0007343; GO:0008190; GO:0008327; GO:0008380; GO:0008544; GO:0010468; GO:0017148; GO:0035198; GO:0043009; GO:0045947; GO:0048025; GO:0048255; GO:0048598; GO:0050658; GO:0050686; GO:0051031; GO:0051236; GO:0062153; GO:0070062; GO:1990428; GO:2000773
TRINITY_DN1176_c0_g1_i1	7	2570	3.50831e-161	0.922408	Upregulated	SA-p vs SA	YBHN_ECOLI	Inner membrane protein YbhN	ybhN b0788 JW0771			plasma membrane [GO:0005886]			ybhN			Escherichia coli (strain K12)	YBHN_ECOLI	UPI000013A35A	plasma membrane [GO:0005886]	GO:0005886
TRINITY_DN2025_c1_g2_i1	159	1	1.37065e-09	-0.465832	Downregulated	SA-p vs SA	YBEY_STAAC	Endoribonuclease YbeY (EC 3.1.-.-)	ybeY SACOL1627		rRNA processing [GO:0006364]	cytoplasm [GO:0005737]	metalloendopeptidase activity [GO:0004222]; RNA endonuclease activity [GO:0004521]; zinc ion binding [GO:0008270]		ybeY	3.1.-.-	FUNCTION: Single strand-specific metallo-endoribonuclease involved in late-stage 70S ribosome quality control and in maturation of the 3' terminus of the 16S rRNA. {ECO:0000255|HAMAP-Rule:MF_00009}.	Staphylococcus aureus (strain COL)	YBEY_STAAC	UPI000013AD70	cytoplasm [GO:0005737]; metalloendopeptidase activity [GO:0004222]; RNA endonuclease activity [GO:0004521]; zinc ion binding [GO:0008270]; rRNA processing [GO:0006364]	GO:0004222; GO:0004521; GO:0005737; GO:0006364; GO:0008270
TRINITY_DN739_c0_g3_i1	2130	1	9.8541e-63	-0.794084	Downregulated	SA-p vs SA	YBCI_BACSU	Uncharacterized protein YbcI	ybcI BSU01880						ybcI			Bacillus subtilis (strain 168)	YBCI_BACSU	UPI000005FE67
TRINITY_DN754_c0_g1_i1	50403	28	7.76942e-161	-0.772798	Downregulated	SA-p vs SA	YAG5_STAAU	Hydrolase in agr operon (EC 3.5.-.-) (ORF 5)					hydrolase activity [GO:0016787]			3.5.-.-		Staphylococcus aureus	YAG5_STAAU	UPI000005423D	hydrolase activity [GO:0016787]	GO:0016787
TRINITY_DN4351_c0_g1_i1	6035	4	2.86886e-95	-0.750463	Downregulated	SA-p vs SA	Y972_STAAB	UPF0637 protein SAB0972c	SAB0972c									Staphylococcus aureus (strain bovine RF122 / ET3-1)	Y972_STAAB	UPI00005FE3F9
TRINITY_DN86_c0_g1_i45	586.45	1.48	1.70424e-28	-0.58134	Downregulated	SA-p vs SA	Y968_STAAM	Uncharacterized protein SAV0968	SAV0968				acetylpyruvate hydrolase activity [GO:0018773]; metal ion binding [GO:0046872]					Staphylococcus aureus (strain Mu50 / ATCC 700699)	Y968_STAAM	UPI0000054B26	acetylpyruvate hydrolase activity [GO:0018773]; metal ion binding [GO:0046872]	GO:0018773; GO:0046872
TRINITY_DN1646_c1_g1_i2	4176	5	6.18382e-80	-0.675658	Downregulated	SA-p vs SA	Y886_STAAW	UPF0738 protein MW0886	MW0886									Staphylococcus aureus (strain MW2)	Y886_STAAW	UPI00000D9D4A
TRINITY_DN6333_c1_g2_i1	62	1	0.000857787	-0.346703	Downregulated	SA-p vs SA	Y787_STAAC	Putative lipid kinase SACOL0787 (EC 2.7.1.-)	SACOL0787		phospholipid biosynthetic process [GO:0008654]	plasma membrane [GO:0005886]	ATP binding [GO:0005524]; ATP-dependent diacylglycerol kinase activity [GO:0004143]; metal ion binding [GO:0046872]			2.7.1.-	FUNCTION: May catalyze the ATP-dependent phosphorylation of lipids other than diacylglycerol (DAG). {ECO:0000250}.	Staphylococcus aureus (strain COL)	Y787_STAAC	UPI000005479F	plasma membrane [GO:0005886]; ATP binding [GO:0005524]; ATP-dependent diacylglycerol kinase activity [GO:0004143]; metal ion binding [GO:0046872]; phospholipid biosynthetic process [GO:0008654]	GO:0004143; GO:0005524; GO:0005886; GO:0008654; GO:0046872
TRINITY_DN9832_c1_g4_i1	1	3229	5.61684e-171	1.19743	Upregulated	SA-p vs SA	Y712_PSEAE	UPF0386 protein PA0712	PA0712									Pseudomonas aeruginosa (strain ATCC 15692 / DSM 22644 / CIP 104116 / JCM 14847 / LMG 12228 / 1C / PRS 101 / PAO1)	Y712_PSEAE	UPI00000C5115
TRINITY_DN4497_c0_g3_i1	424	1	2.81406e-22	-0.589902	Downregulated	SA-p vs SA	Y594_HAEIN	Uncharacterized protein HI_0594	HI_0594			plasma membrane [GO:0005886]						Haemophilus influenzae (strain ATCC 51907 / DSM 11121 / KW20 / Rd)	Y594_HAEIN	UPI000013ADFE	plasma membrane [GO:0005886]	GO:0005886
TRINITY_DN848_c0_g1_i1	5080	7	4.41218e-85	-0.657884	Downregulated	SA-p vs SA	Y593_STAAM	UPF0741 protein SAV0593	SAV0593									Staphylococcus aureus (strain Mu50 / ATCC 700699)	Y593_STAAM	UPI00000D7681
TRINITY_DN6689_c0_g1_i4	7432	1	1.79172e-107	-0.952161	Downregulated	SA-p vs SA	Y583_STAAM	UPF0382 membrane protein SAV0583	SAV0583			plasma membrane [GO:0005886]						Staphylococcus aureus (strain Mu50 / ATCC 700699)	Y583_STAAM	UPI0000054811	plasma membrane [GO:0005886]	GO:0005886
TRINITY_DN141_c1_g2_i1	1	16601.4	8.89425e-242	1.40454	Upregulated	SA-p vs SA	Y5713_PSEAB	UPF0234 protein PA14_57130	PA14_57130			cytosol [GO:0005829]	nucleotide binding [GO:0000166]					Pseudomonas aeruginosa (strain UCBPP-PA14)	Y5713_PSEAB	UPI000039636B	cytosol [GO:0005829]; nucleotide binding [GO:0000166]	GO:0000166; GO:0005829
TRINITY_DN36086_c0_g1_i1	4	9451	2.27021e-217	1.15792	Upregulated	SA-p vs SA	Y4841_PSEAE	Uncharacterized Nudix hydrolase PA4841 (EC 3.6.-.-)	PA4841				hydrolase activity, acting on acid anhydrides [GO:0016817]; metal ion binding [GO:0046872]			3.6.-.-		Pseudomonas aeruginosa (strain ATCC 15692 / DSM 22644 / CIP 104116 / JCM 14847 / LMG 12228 / 1C / PRS 101 / PAO1)	Y4841_PSEAE	UPI000013A5F4	hydrolase activity, acting on acid anhydrides [GO:0016817]; metal ion binding [GO:0046872]	GO:0016817; GO:0046872
TRINITY_DN324_c0_g1_i1	71.17	3	0.00607118	-0.225182	Downregulated	SA-p vs SA	Y482_STAAC	Uncharacterized lipoprotein SACOL0482	SACOL0482			plasma membrane [GO:0005886]						Staphylococcus aureus (strain COL)	Y482_STAAC	UPI00004B5B10	plasma membrane [GO:0005886]	GO:0005886
TRINITY_DN52_c0_g2_i7	3.55059e+06	7491.08	2.11744e-138	-0.603997	Downregulated	SA-p vs SA	Y478_STAAR	Nucleoid-associated protein SAR0478	SAR0478			bacterial nucleoid [GO:0043590]; cytosol [GO:0005829]	DNA binding [GO:0003677]				FUNCTION: Binds to DNA and alters its conformation. May be involved in regulation of gene expression, nucleoid organization and DNA protection. {ECO:0000255|HAMAP-Rule:MF_00274}.	Staphylococcus aureus (strain MRSA252)	Y478_STAAR	UPI0000054501	bacterial nucleoid [GO:0043590]; cytosol [GO:0005829]; DNA binding [GO:0003677]	GO:0003677; GO:0005829; GO:0043590
TRINITY_DN8356_c0_g2_i1	9	2064	8.79062e-152	0.862883	Upregulated	SA-p vs SA	Y4745_PSEAB	YcgL domain-containing protein PA14_47450	PA14_47450									Pseudomonas aeruginosa (strain UCBPP-PA14)	Y4745_PSEAB	UPI000045D112
TRINITY_DN9990_c0_g3_i1	1	30881.7	1.06275e-268	1.48306	Upregulated	SA-p vs SA	Y4473_PSEAE
TRINITY_DN7156_c0_g3_i1	2123	1	1.27599e-62	-0.793667	Downregulated	SA-p vs SA	Y443_STAAM	Uncharacterized lipoprotein SAV0443	lpl7 SAV0443			plasma membrane [GO:0005886]			lpl7			Staphylococcus aureus (strain Mu50 / ATCC 700699)	Y443_STAAM	UPI00000CADAE	plasma membrane [GO:0005886]	GO:0005886
TRINITY_DN40579_c0_g1_i1	5	3036	2.48737e-168	0.986049	Upregulated	SA-p vs SA	Y4424_PSEAE	UPF0102 protein PA4424	PA4424				nucleic acid binding [GO:0003676]					Pseudomonas aeruginosa (strain ATCC 15692 / DSM 22644 / CIP 104116 / JCM 14847 / LMG 12228 / 1C / PRS 101 / PAO1)	Y4424_PSEAE	UPI0000139DDF	nucleic acid binding [GO:0003676]	GO:0003676
TRINITY_DN3614_c0_g1_i1	1	25485	2.28909e-260	1.45876	Upregulated	SA-p vs SA	Y4219_PSEAE	Uncharacterized protein PA4219	PA4219			plasma membrane [GO:0005886]						Pseudomonas aeruginosa (strain ATCC 15692 / DSM 22644 / CIP 104116 / JCM 14847 / LMG 12228 / 1C / PRS 101 / PAO1)	Y4219_PSEAE	UPI0000139BF1	plasma membrane [GO:0005886]	GO:0005886
TRINITY_DN13_c0_g6_i1	5	6508	3.15627e-201	1.0825	Upregulated	SA-p vs SA	Y4073_PSEAB	Probable RNA methyltransferase PA14_40730 (EC 2.1.1.-)	PA14_40730		rRNA base methylation [GO:0070475]; tRNA methylation [GO:0030488]	cytoplasm [GO:0005737]	4 iron, 4 sulfur cluster binding [GO:0051539]; metal ion binding [GO:0046872]; RNA methyltransferase activity [GO:0008173]			2.1.1.-		Pseudomonas aeruginosa (strain UCBPP-PA14)	Y4073_PSEAB	UPI000045D1F9	cytoplasm [GO:0005737]; 4 iron, 4 sulfur cluster binding [GO:0051539]; metal ion binding [GO:0046872]; RNA methyltransferase activity [GO:0008173]; rRNA base methylation [GO:0070475]; tRNA methylation [GO:0030488]	GO:0005737; GO:0008173; GO:0030488; GO:0046872; GO:0051539; GO:0070475
TRINITY_DN50282_c0_g1_i1	1	3187	2.05712e-170	1.19577	Upregulated	SA-p vs SA	Y3873_PSEAB	Uncharacterized MFS-type transporter PA14_38730	PA14_38730			plasma membrane [GO:0005886]	transmembrane transporter activity [GO:0022857]					Pseudomonas aeruginosa (strain UCBPP-PA14)	Y3873_PSEAB	UPI000045D23E	plasma membrane [GO:0005886]; transmembrane transporter activity [GO:0022857]	GO:0005886; GO:0022857
TRINITY_DN378_c0_g1_i5	2	12424.1	3.23806e-229	1.2802	Upregulated	SA-p vs SA	Y3854_PSEAE	UPF0213 protein PA3854	PA3854									Pseudomonas aeruginosa (strain ATCC 15692 / DSM 22644 / CIP 104116 / JCM 14847 / LMG 12228 / 1C / PRS 101 / PAO1)	Y3854_PSEAE	UPI00001395C2
TRINITY_DN1244_c1_g1_i1	1	9720	1.39372e-218	1.33683	Upregulated	SA-p vs SA	Y3753_PSEAE	Uncharacterized protein PA3753	PA3753									Pseudomonas aeruginosa (strain ATCC 15692 / DSM 22644 / CIP 104116 / JCM 14847 / LMG 12228 / 1C / PRS 101 / PAO1)	Y3753_PSEAE	UPI0000139451
TRINITY_DN8305_c0_g1_i1	61	16961	4.19297e-227	0.887249	Upregulated	SA-p vs SA	Y3693_PSEAE	Macro domain-containing protein PA3693	PA3693				O-acetyl-ADP-ribose deacetylase activity [GO:0061463]					Pseudomonas aeruginosa (strain ATCC 15692 / DSM 22644 / CIP 104116 / JCM 14847 / LMG 12228 / 1C / PRS 101 / PAO1)	Y3693_PSEAE	UPI000013926E	O-acetyl-ADP-ribose deacetylase activity [GO:0061463]	GO:0061463
TRINITY_DN35971_c0_g1_i1	15	1085	1.77872e-124	0.716921	Upregulated	SA-p vs SA	Y3539_PSEAE	UPF0246 protein PA3539	PA3539		response to hydroperoxide [GO:0033194]	cytosol [GO:0005829]						Pseudomonas aeruginosa (strain ATCC 15692 / DSM 22644 / CIP 104116 / JCM 14847 / LMG 12228 / 1C / PRS 101 / PAO1)	Y3539_PSEAE	UPI00000C5A5E	cytosol [GO:0005829]; response to hydroperoxide [GO:0033194]	GO:0005829; GO:0033194
TRINITY_DN45330_c0_g1_i1	1	21918	7.94752e-254	1.43969	Upregulated	SA-p vs SA	Y335_SYNY3	Uncharacterized protein sll0335	sll0335									Synechocystis sp. (strain ATCC 27184 / PCC 6803 / Kazusa)	Y335_SYNY3	UPI0000139643
TRINITY_DN454_c0_g8_i1	2	1623	1.74667e-141	1.02274	Upregulated	SA-p vs SA	Y3311_PSEAE
TRINITY_DN6407_c0_g1_i9	789.21	1	4.98236e-35	-0.668494	Downregulated	SA-p vs SA	Y2606_STAAW	UPF0312 protein MW2606	MW2606									Staphylococcus aureus (strain MW2)	Y2606_STAAW	UPI00000DA050
TRINITY_DN31002_c0_g1_i1	46	7565	1.4467e-198	0.82082	Upregulated	SA-p vs SA	Y2604_PSEAE	Uncharacterized protein PA2604	PA2604		negative regulation of apoptotic process [GO:0043066]; regulation of proteolysis [GO:0030162]	plasma membrane [GO:0005886]	calcium channel activity [GO:0005262]					Pseudomonas aeruginosa (strain ATCC 15692 / DSM 22644 / CIP 104116 / JCM 14847 / LMG 12228 / 1C / PRS 101 / PAO1)	Y2604_PSEAE	UPI000013BE74	plasma membrane [GO:0005886]; calcium channel activity [GO:0005262]; negative regulation of apoptotic process [GO:0043066]; regulation of proteolysis [GO:0030162]	GO:0005262; GO:0005886; GO:0030162; GO:0043066
TRINITY_DN266_c0_g2_i2	1093.66	2	1.38252e-41	-0.622083	Downregulated	SA-p vs SA	Y2597_STAAC	Uncharacterized hydrolase SACOL2597 (EC 3.-.-.-)	SACOL2597			membrane [GO:0016020]	hydrolase activity [GO:0016787]			3.-.-.-		Staphylococcus aureus (strain COL)	Y2597_STAAC	UPI00004B5D04	membrane [GO:0016020]; hydrolase activity [GO:0016787]	GO:0016020; GO:0016787
TRINITY_DN1115_c0_g1_i2	1062	2	1.0174e-40	-0.618368	Downregulated	SA-p vs SA	Y2523_STAAM	Putative NAD(P)H nitroreductase SAV2523 (EC 1.-.-.-)	SAV2523		2,4,6-trinitrotoluene catabolic process [GO:0046256]	cytosol [GO:0005829]	oxidoreductase activity, acting on other nitrogenous compounds as donors, with NAD or NADP as acceptor [GO:0046857]			1.-.-.-		Staphylococcus aureus (strain Mu50 / ATCC 700699)	Y2523_STAAM	UPI00000D779D	cytosol [GO:0005829]; oxidoreductase activity, acting on other nitrogenous compounds as donors, with NAD or NADP as acceptor [GO:0046857]; 2,4,6-trinitrotoluene catabolic process [GO:0046256]	GO:0005829; GO:0046256; GO:0046857
TRINITY_DN640_c0_g2_i2	37	1	0.0231566	-0.281404	Downregulated	SA-p vs SA	Y2368_STAAM	Uncharacterized lipoprotein SAV2368	SAV2368			plasma membrane [GO:0005886]						Staphylococcus aureus (strain Mu50 / ATCC 700699)	Y2368_STAAM	UPI00000CAB73	plasma membrane [GO:0005886]	GO:0005886
TRINITY_DN3662_c1_g2_i3	538.66	3.85	1.23058e-22	-0.449655	Downregulated	SA-p vs SA	Y2231_STAAS	UPF0060 membrane protein SAS2231	SAS2231			plasma membrane [GO:0005886]						Staphylococcus aureus (strain MSSA476)	Y2231_STAAS	UPI0000054A0F	plasma membrane [GO:0005886]	GO:0005886
TRINITY_DN102_c1_g3_i1	3	37420	4.93126e-277	1.36838	Upregulated	SA-p vs SA	Y2077_PSEAB	STAS-domain containing protein PA14_20770	PA14_20770			extracellular region [GO:0005576]	anti-sigma factor antagonist activity [GO:0043856]					Pseudomonas aeruginosa (strain UCBPP-PA14)	Y2077_PSEAB	UPI00000C59C9	extracellular region [GO:0005576]; anti-sigma factor antagonist activity [GO:0043856]	GO:0005576; GO:0043856
TRINITY_DN1292_c0_g2_i1	724	1	9.80101e-33	-0.657585	Downregulated	SA-p vs SA	Y1957_STAAC	Uncharacterized RNA methyltransferase SACOL1957 (EC 2.1.1.-)	SACOL1957		rRNA base methylation [GO:0070475]		4 iron, 4 sulfur cluster binding [GO:0051539]; metal ion binding [GO:0046872]; rRNA (uridine-C5-)-methyltransferase activity [GO:0070041]			2.1.1.-		Staphylococcus aureus (strain COL)	Y1957_STAAC	UPI00004B5C5C	4 iron, 4 sulfur cluster binding [GO:0051539]; metal ion binding [GO:0046872]; rRNA (uridine-C5-)-methyltransferase activity [GO:0070041]; rRNA base methylation [GO:0070475]	GO:0046872; GO:0051539; GO:0070041; GO:0070475
TRINITY_DN1559_c0_g3_i1	1540	1	6.74213e-53	-0.753056	Downregulated	SA-p vs SA	Y1897_STAAM	Uncharacterized RNA methyltransferase SAV1897 (EC 2.1.1.-)	SAV1897		rRNA base methylation [GO:0070475]		4 iron, 4 sulfur cluster binding [GO:0051539]; metal ion binding [GO:0046872]; rRNA (uridine-C5-)-methyltransferase activity [GO:0070041]			2.1.1.-		Staphylococcus aureus (strain Mu50 / ATCC 700699)	Y1897_STAAM	UPI00000CADD1	4 iron, 4 sulfur cluster binding [GO:0051539]; metal ion binding [GO:0046872]; rRNA (uridine-C5-)-methyltransferase activity [GO:0070041]; rRNA base methylation [GO:0070475]	GO:0046872; GO:0051539; GO:0070041; GO:0070475
TRINITY_DN5271_c0_g2_i1	107	2	1.8943e-05	-0.328051	Downregulated	SA-p vs SA	Y1845_STAAM	UPF0342 protein SAV1845	SAV1845									Staphylococcus aureus (strain Mu50 / ATCC 700699)	Y1845_STAAM	UPI0000054315
TRINITY_DN1799_c1_g1_i1	3421.1	4	1.98441e-74	-0.678663	Downregulated	SA-p vs SA	Y1797_STAAS	Uncharacterized protein SAS1797	SAS1797									Staphylococcus aureus (strain MSSA476)	Y1797_STAAS	UPI0000052288
TRINITY_DN2574_c0_g4_i1	7178	19	8.343e-87	-0.575306	Downregulated	SA-p vs SA	Y1708_STAAM	Uncharacterized peptidase SAV1708 (EC 3.4.-.-)	SAV1708				hydrolase activity [GO:0016787]; metal ion binding [GO:0046872]			3.4.-.-		Staphylococcus aureus (strain Mu50 / ATCC 700699)	Y1708_STAAM	UPI00003B1AF1	hydrolase activity [GO:0016787]; metal ion binding [GO:0046872]	GO:0016787; GO:0046872
TRINITY_DN1172_c0_g1_i2	4101.85	4	9.14307e-81	-0.701619	Downregulated	SA-p vs SA	Y1615_STAAM	UPF0473 protein SAV1615	SAV1615									Staphylococcus aureus (strain Mu50 / ATCC 700699)	Y1615_STAAM	UPI0000054287
TRINITY_DN37183_c0_g1_i1	171	1	4.8108e-10	-0.475036	Downregulated	SA-p vs SA	Y1603_STAAB	UPF0354 protein SAB1603c	SAB1603c									Staphylococcus aureus (strain bovine RF122 / ET3-1)	Y1603_STAAB	UPI00005FE5AA
TRINITY_DN1262_c11_g1_i1	3	12968	4.5025e-231	1.23433	Upregulated	SA-p vs SA	Y1579_PSEAE	Uncharacterized protein PA1579	PA1579				lipid binding [GO:0008289]				FUNCTION: May play a role in the interaction of the bacterium with animal cells.	Pseudomonas aeruginosa (strain ATCC 15692 / DSM 22644 / CIP 104116 / JCM 14847 / LMG 12228 / 1C / PRS 101 / PAO1)	Y1579_PSEAE	UPI000013AD81	lipid binding [GO:0008289]	GO:0008289
TRINITY_DN373_c0_g2_i1	2000.14	2.87	8.7691e-58	-0.652761	Downregulated	SA-p vs SA	Y1479_STAA8	UPF0302 protein SAOUHSC_01479	SAOUHSC_01479									Staphylococcus aureus (strain NCTC 8325 / PS 47)	Y1479_STAA8	UPI000069AAB8
TRINITY_DN1255_c0_g1_i3	1170.84	2.65	1.56225e-41	-0.595112	Downregulated	SA-p vs SA	Y1409_STAAM	Uncharacterized protein SAV1409	SAV1409				ATP binding [GO:0005524]; ATP hydrolysis activity [GO:0016887]					Staphylococcus aureus (strain Mu50 / ATCC 700699)	Y1409_STAAM	UPI0000054A6B	ATP binding [GO:0005524]; ATP hydrolysis activity [GO:0016887]	GO:0005524; GO:0016887
TRINITY_DN272_c0_g1_i4	2817.41	6.88	6.05511e-64	-0.585503	Downregulated	SA-p vs SA	Y1170_STAAS	UPF0122 protein SAS1170	SAS1170								FUNCTION: Might take part in the signal recognition particle (SRP) pathway. This is inferred from the conservation of its genetic proximity to ftsY/ffh. May be a regulatory protein. {ECO:0000255|HAMAP-Rule:MF_00245}.	Staphylococcus aureus (strain MSSA476)	Y1170_STAAS	UPI0000054ACF
TRINITY_DN3753_c0_g1_i1	274	1	1.03889e-15	-0.534674	Downregulated	SA-p vs SA	Y1109_STAAW	Uncharacterized protein MW1109	MW1109		glycerol metabolic process [GO:0006071]		glycerone kinase activity [GO:0004371]					Staphylococcus aureus (strain MW2)	Y1109_STAAW	UPI00000D9DA2	glycerone kinase activity [GO:0004371]; glycerol metabolic process [GO:0006071]	GO:0004371; GO:0006071
TRINITY_DN680_c0_g4_i1	32	2119	5.32977e-153	0.705749	Upregulated	SA-p vs SA	Y0859_MYCTU	Putative acyltransferase Rv0859 (EC 2.3.1.-)	fadA Rv0859			peptidoglycan-based cell wall [GO:0009274]; plasma membrane [GO:0005886]	acetyl-CoA C-acetyltransferase activity [GO:0003985]		fadA	2.3.1.-		Mycobacterium tuberculosis (strain ATCC 25618 / H37Rv)	Y0859_MYCTU	UPI00000D4FD6	peptidoglycan-based cell wall [GO:0009274]; plasma membrane [GO:0005886]; acetyl-CoA C-acetyltransferase activity [GO:0003985]	GO:0003985; GO:0005886; GO:0009274
TRINITY_DN791_c0_g2_i5	1113.67	2.14	1.34056e-41	-0.615818	Downregulated	SA-p vs SA	Y084_STAAC	Uncharacterized HTH-type transcriptional regulator SACOL0084	SACOL0084				DNA-binding transcription factor activity [GO:0003700]; sequence-specific DNA binding [GO:0043565]					Staphylococcus aureus (strain COL)	Y084_STAAC	UPI0000054A86	DNA-binding transcription factor activity [GO:0003700]; sequence-specific DNA binding [GO:0043565]	GO:0003700; GO:0043565
TRINITY_DN452_c0_g2_i2	274	1	1.03889e-15	-0.534674	Downregulated	SA-p vs SA	XPT_STAAM	Xanthine phosphoribosyltransferase (XPRTase) (EC 2.4.2.22)	xpt SAV0388	PATHWAY: Purine metabolism; XMP biosynthesis via salvage pathway; XMP from xanthine: step 1/1. {ECO:0000255|HAMAP-Rule:MF_01184}.	purine ribonucleoside salvage [GO:0006166]; xanthine metabolic process [GO:0046110]; XMP salvage [GO:0032265]	cytoplasm [GO:0005737]	xanthine phosphoribosyltransferase activity [GO:0000310]		xpt	2.4.2.22	FUNCTION: Converts the preformed base xanthine, a product of nucleic acid breakdown, to xanthosine 5'-monophosphate (XMP), so it can be reused for RNA or DNA synthesis. {ECO:0000255|HAMAP-Rule:MF_01184}.	Staphylococcus aureus (strain Mu50 / ATCC 700699)	XPT_STAAM	UPI00000D77B2	cytoplasm [GO:0005737]; xanthine phosphoribosyltransferase activity [GO:0000310]; purine ribonucleoside salvage [GO:0006166]; xanthine metabolic process [GO:0046110]; XMP salvage [GO:0032265]	GO:0000310; GO:0005737; GO:0006166; GO:0032265; GO:0046110
TRINITY_DN5148_c0_g1_i1	11	31224	3.5092e-269	1.18113	Upregulated	SA-p vs SA	XPT_PSEA7	Xanthine phosphoribosyltransferase (XPRTase) (EC 2.4.2.22)	xpt PSPA7_6072	PATHWAY: Purine metabolism; XMP biosynthesis via salvage pathway; XMP from xanthine: step 1/1. {ECO:0000255|HAMAP-Rule:MF_01184}.	purine ribonucleoside salvage [GO:0006166]; xanthine metabolic process [GO:0046110]; XMP salvage [GO:0032265]	cytoplasm [GO:0005737]	xanthine phosphoribosyltransferase activity [GO:0000310]		xpt	2.4.2.22	FUNCTION: Converts the preformed base xanthine, a product of nucleic acid breakdown, to xanthosine 5'-monophosphate (XMP), so it can be reused for RNA or DNA synthesis. {ECO:0000255|HAMAP-Rule:MF_01184}.	Pseudomonas aeruginosa (strain PA7)	XPT_PSEA7	UPI0000D72680	cytoplasm [GO:0005737]; xanthine phosphoribosyltransferase activity [GO:0000310]; purine ribonucleoside salvage [GO:0006166]; xanthine metabolic process [GO:0046110]; XMP salvage [GO:0032265]	GO:0000310; GO:0005737; GO:0006166; GO:0032265; GO:0046110
TRINITY_DN42072_c0_g1_i1	15	139	6.45476e-45	0.456991	Upregulated	SA-p vs SA	WBPE_PSEAE	UDP-2-acetamido-2-deoxy-3-oxo-D-glucuronate aminotransferase (UDP-3-oxo-D-GlcNAcA aminotransferase) (EC 2.6.1.98) (UDP-2-acetamido-2-deoxy-alpha-D-ribo-hex-3-uluronic acid transaminase) (UDP-2-acetamido-2-deoxy-ribo-hexuluronate aminotransferase)	wbpE PA3155	PATHWAY: Bacterial outer membrane biogenesis; LPS O-antigen biosynthesis. {ECO:0000269|PubMed:18621892, ECO:0000269|PubMed:19282284, ECO:0000269|PubMed:19348502, ECO:0000269|PubMed:8939432}.	cell wall organization [GO:0071555]; lipopolysaccharide biosynthetic process [GO:0009103]; O antigen biosynthetic process [GO:0009243]; polysaccharide biosynthetic process [GO:0000271]; UDP-glucuronate biosynthetic process [GO:0006065]		pyridoxal phosphate binding [GO:0030170]; transaminase activity [GO:0008483]		wbpE	2.6.1.98	FUNCTION: Plays a role in the biosynthesis of B-band O antigen for serotype O5. Catalyzes the amination of UDP-2-acetamido-2-deoxy-3-oxo-D-glucuronic acid (UDP-3-oxo-D-GlcNAcA) to UDP-2-acetamido-3-amino-2,3-dideoxy-D-glucuronic acid (UDP-GlcNAc3NA), using L-glutamate as the preferred amine donor. {ECO:0000269|PubMed:18621892, ECO:0000269|PubMed:19282284, ECO:0000269|PubMed:19348502}.	Pseudomonas aeruginosa (strain ATCC 15692 / DSM 22644 / CIP 104116 / JCM 14847 / LMG 12228 / 1C / PRS 101 / PAO1)	WBPE_PSEAE	UPI00000C592E	pyridoxal phosphate binding [GO:0030170]; transaminase activity [GO:0008483]; cell wall organization [GO:0071555]; lipopolysaccharide biosynthetic process [GO:0009103]; O antigen biosynthetic process [GO:0009243]; polysaccharide biosynthetic process [GO:0000271]; UDP-glucuronate biosynthetic process [GO:0006065]	GO:0000271; GO:0006065; GO:0008483; GO:0009103; GO:0009243; GO:0030170; GO:0071555
TRINITY_DN3128_c0_g1_i2	263	1	4.80239e-15	-0.529491	Downregulated	SA-p vs SA	WALR_STAAM	Transcriptional regulatory protein WalR	walR vicR SAV0018		regulation of DNA-templated transcription [GO:0006355]	cytosol [GO:0005829]; protein-DNA complex [GO:0032993]	phosphorelay response regulator activity [GO:0000156]; transcription cis-regulatory region binding [GO:0000976]		walR		FUNCTION: Member of the two-component regulatory system WalK/WalR that regulates genes involved in cell wall metabolism, virulence regulation, biofilm production, oxidative stress resistance and antibiotic resistance via direct or indirect regulation of autolysins (By similarity). Functions as a transcription regulator by direct binding to promoter regions (By similarity). {ECO:0000250|UniProtKB:…	Staphylococcus aureus (strain Mu50 / ATCC 700699)	WALR_STAAM	UPI00000D7820	cytosol [GO:0005829]; protein-DNA complex [GO:0032993]; phosphorelay response regulator activity [GO:0000156]; transcription cis-regulatory region binding [GO:0000976]; regulation of DNA-templated transcription [GO:0006355]	GO:0000156; GO:0000976; GO:0005829; GO:0006355; GO:0032993
TRINITY_DN745_c0_g3_i2	110.57	5	0.000674911	-0.216296	Downregulated	SA-p vs SA	VRAR_STAAW	Response regulator protein VraR	vraR MW1824		phosphorelay signal transduction system [GO:0000160]; regulation of DNA-templated transcription [GO:0006355]	cytoplasm [GO:0005737]	DNA binding [GO:0003677]		vraR		FUNCTION: Member of the two-component regulatory system VraS/VraR involved in the control of the cell wall peptidoglycan biosynthesis. Upon cellular stress, the histidine kinase VraS transfers the phosphoryl group onto VraR. Upon phosphorylation, VraR dimerizes at the N-terminal domain. In turn, phosphorylation-induced dimerization expands and enhances the VraR binding to its own promoter leading…	Staphylococcus aureus (strain MW2)	VRAR_STAAW	UPI000002E89F	cytoplasm [GO:0005737]; DNA binding [GO:0003677]; phosphorelay signal transduction system [GO:0000160]; regulation of DNA-templated transcription [GO:0006355]	GO:0000160; GO:0003677; GO:0005737; GO:0006355
TRINITY_DN83_c0_g3_i1	4617	5	8.57136e-84	-0.688357	Downregulated	SA-p vs SA	UVRB_STAAR	UvrABC system protein B (Protein UvrB) (Excinuclease ABC subunit B)	uvrB SAR0812		nucleotide-excision repair [GO:0006289]; SOS response [GO:0009432]	cytoplasm [GO:0005737]; excinuclease repair complex [GO:0009380]	ATP binding [GO:0005524]; ATP hydrolysis activity [GO:0016887]; DNA binding [GO:0003677]; excinuclease ABC activity [GO:0009381]		uvrB		FUNCTION: The UvrABC repair system catalyzes the recognition and processing of DNA lesions. A damage recognition complex composed of 2 UvrA and 2 UvrB subunits scans DNA for abnormalities. Upon binding of the UvrA(2)B(2) complex to a putative damaged site, the DNA wraps around one UvrB monomer. DNA wrap is dependent on ATP binding by UvrB and probably causes local melting of the DNA helix, facili…	Staphylococcus aureus (strain MRSA252)	UVRB_STAAR	UPI00003B1500	cytoplasm [GO:0005737]; excinuclease repair complex [GO:0009380]; ATP binding [GO:0005524]; ATP hydrolysis activity [GO:0016887]; DNA binding [GO:0003677]; excinuclease ABC activity [GO:0009381]; nucleotide-excision repair [GO:0006289]; SOS response [GO:0009432]	GO:0003677; GO:0005524; GO:0005737; GO:0006289; GO:0009380; GO:0009381; GO:0009432; GO:0016887
TRINITY_DN1593_c1_g1_i2	1	1961	1.44558e-149	1.13435	Upregulated	SA-p vs SA	URE3_PSEAE	Urease subunit gamma (EC 3.5.1.5) (Urea amidohydrolase subunit gamma)	ureA PA4865	PATHWAY: Nitrogen metabolism; urea degradation; CO(2) and NH(3) from urea (urease route): step 1/1. {ECO:0000255|HAMAP-Rule:MF_00739}.	urea catabolic process [GO:0043419]	cytoplasm [GO:0005737]	nickel cation binding [GO:0016151]; urease activity [GO:0009039]		ureA	3.5.1.5		Pseudomonas aeruginosa (strain ATCC 15692 / DSM 22644 / CIP 104116 / JCM 14847 / LMG 12228 / 1C / PRS 101 / PAO1)	URE3_PSEAE	UPI00000C5E47	cytoplasm [GO:0005737]; nickel cation binding [GO:0016151]; urease activity [GO:0009039]; urea catabolic process [GO:0043419]	GO:0005737; GO:0009039; GO:0016151; GO:0043419
TRINITY_DN97_c0_g5_i1	1	3887	5.714e-179	1.22089	Upregulated	SA-p vs SA	URE2_PSEA7	Urease subunit beta (EC 3.5.1.5) (Urea amidohydrolase subunit beta)	ureB PSPA7_5588	PATHWAY: Nitrogen metabolism; urea degradation; CO(2) and NH(3) from urea (urease route): step 1/1. {ECO:0000255|HAMAP-Rule:MF_01954}.	urea catabolic process [GO:0043419]	urease complex [GO:0035550]	urease activity [GO:0009039]		ureB	3.5.1.5		Pseudomonas aeruginosa (strain PA7)	URE2_PSEA7	UPI0000D72748	urease complex [GO:0035550]; urease activity [GO:0009039]; urea catabolic process [GO:0043419]	GO:0009039; GO:0035550; GO:0043419
TRINITY_DN14192_c0_g2_i1	2299	3	4.54702e-62	-0.664773	Downregulated	SA-p vs SA	UPPP_STAAC	Undecaprenyl-diphosphatase (EC 3.6.1.27) (Bacitracin resistance protein) (Undecaprenyl pyrophosphate phosphatase)	uppP bacA SACOL0743		cell wall organization [GO:0071555]; peptidoglycan biosynthetic process [GO:0009252]; regulation of cell shape [GO:0008360]; response to antibiotic [GO:0046677]	plasma membrane [GO:0005886]	undecaprenyl-diphosphatase activity [GO:0050380]		uppP	3.6.1.27	FUNCTION: Catalyzes the dephosphorylation of undecaprenyl diphosphate (UPP). Confers resistance to bacitracin. {ECO:0000255|HAMAP-Rule:MF_01006}.	Staphylococcus aureus (strain COL)	UPPP_STAAC	UPI00004B5B50	plasma membrane [GO:0005886]; undecaprenyl-diphosphatase activity [GO:0050380]; cell wall organization [GO:0071555]; peptidoglycan biosynthetic process [GO:0009252]; regulation of cell shape [GO:0008360]; response to antibiotic [GO:0046677]	GO:0005886; GO:0008360; GO:0009252; GO:0046677; GO:0050380; GO:0071555
TRINITY_DN14192_c0_g1_i1	3972	2	9.21685e-83	-0.785229	Downregulated	SA-p vs SA	UPPP_STAA8	Undecaprenyl-diphosphatase (EC 3.6.1.27) (Bacitracin resistance protein) (Undecaprenyl pyrophosphate phosphatase)	uppP SAOUHSC_00691		cell wall organization [GO:0071555]; peptidoglycan biosynthetic process [GO:0009252]; regulation of cell shape [GO:0008360]; response to antibiotic [GO:0046677]	plasma membrane [GO:0005886]	undecaprenyl-diphosphatase activity [GO:0050380]		uppP	3.6.1.27	FUNCTION: Catalyzes the dephosphorylation of undecaprenyl diphosphate (UPP). Confers resistance to bacitracin. {ECO:0000255|HAMAP-Rule:MF_01006}.	Staphylococcus aureus (strain NCTC 8325 / PS 47)	UPPP_STAA8	UPI0000696BD7	plasma membrane [GO:0005886]; undecaprenyl-diphosphatase activity [GO:0050380]; cell wall organization [GO:0071555]; peptidoglycan biosynthetic process [GO:0009252]; regulation of cell shape [GO:0008360]; response to antibiotic [GO:0046677]	GO:0005886; GO:0008360; GO:0009252; GO:0046677; GO:0050380; GO:0071555
TRINITY_DN14395_c1_g1_i3	403	2	9.07606e-20	-0.495797	Downregulated	SA-p vs SA	UP355_STAAW	UPF0355 protein MW0363	MW0363									Staphylococcus aureus (strain MW2)	UP355_STAAW	UPI000005454B
TRINITY_DN423_c0_g1_i2	543.1	2	3.86175e-25	-0.533538	Downregulated	SA-p vs SA	UNG_STAAC	Uracil-DNA glycosylase (UDG) (EC 3.2.2.27)	ung SACOL0627		base-excision repair, AP site formation via deaminated base removal [GO:0097510]	cytoplasm [GO:0005737]	uracil DNA N-glycosylase activity [GO:0004844]		ung	3.2.2.27	FUNCTION: Excises uracil residues from the DNA which can arise as a result of misincorporation of dUMP residues by DNA polymerase or due to deamination of cytosine. {ECO:0000255|HAMAP-Rule:MF_00148}.	Staphylococcus aureus (strain COL)	UNG_STAAC	UPI0000054813	cytoplasm [GO:0005737]; uracil DNA N-glycosylase activity [GO:0004844]; base-excision repair, AP site formation via deaminated base removal [GO:0097510]	GO:0004844; GO:0005737; GO:0097510
TRINITY_DN6029_c0_g6_i1	1	36062	1.98404e-275	1.50267	Upregulated	SA-p vs SA	UBIC_PSEAB	Probable chorismate pyruvate-lyase (CL) (CPL) (EC 4.1.3.40)	ubiC PA14_70720	PATHWAY: Cofactor biosynthesis; ubiquinone biosynthesis. {ECO:0000255|HAMAP-Rule:MF_01632}.	pyruvate biosynthetic process [GO:0042866]; ubiquinone biosynthetic process [GO:0006744]	cytosol [GO:0005829]	chorismate lyase activity [GO:0008813]		ubiC	4.1.3.40	FUNCTION: Removes the pyruvyl group from chorismate, with concomitant aromatization of the ring, to provide 4-hydroxybenzoate (4HB) for the ubiquinone pathway. {ECO:0000255|HAMAP-Rule:MF_01632}.	Pseudomonas aeruginosa (strain UCBPP-PA14)	UBIC_PSEAB	UPI00003970AA	cytosol [GO:0005829]; chorismate lyase activity [GO:0008813]; pyruvate biosynthetic process [GO:0042866]; ubiquinone biosynthetic process [GO:0006744]	GO:0005829; GO:0006744; GO:0008813; GO:0042866
TRINITY_DN6142_c0_g1_i4	1	2	8.52426e-245	0.263039	Upregulated	SA-p vs SA	UBB_BOVIN	Polyubiquitin-B [Cleaved into: Ubiquitin]	UBB		energy homeostasis [GO:0097009]; fat pad development [GO:0060613]; female gonad development [GO:0008585]; female meiosis I [GO:0007144]; hypothalamus gonadotrophin-releasing hormone neuron development [GO:0021888]; male meiosis I [GO:0007141]; mitochondrion transport along microtubule [GO:0047497]; modification-dependent protein catabolic process [GO:0019941]; neuron projection morphogenesis [GO:…	mitochondrial outer membrane [GO:0005741]; neuron projection [GO:0043005]; neuronal cell body [GO:0043025]; nucleus [GO:0005634]	protein tag activity [GO:0031386]; structural constituent of ribosome [GO:0003735]; ubiquitin protein ligase binding [GO:0031625]		UBB		FUNCTION: [Ubiquitin]: Exists either covalently attached to another protein, or free (unanchored) (By similarity). When covalently bound, it is conjugated to target proteins via an isopeptide bond either as a monomer (monoubiquitin), a polymer linked via different Lys residues of the ubiquitin (polyubiquitin chains) or a linear polymer linked via the initiator Met of the ubiquitin (linear polyubi…	Bos taurus (Bovine)	UBB_BOVIN	UPI00006E01A4	mitochondrial outer membrane [GO:0005741]; neuron projection [GO:0043005]; neuronal cell body [GO:0043025]; nucleus [GO:0005634]; protein tag activity [GO:0031386]; structural constituent of ribosome [GO:0003735]; ubiquitin protein ligase binding [GO:0031625]; energy homeostasis [GO:0097009]; fat pad development [GO:0060613]; female gonad development [GO:0008585]; female meiosis I [GO:0007144]; h…	GO:0003735; GO:0005634; GO:0005741; GO:0007141; GO:0007144; GO:0008585; GO:0016567; GO:0019941; GO:0021888; GO:0031386; GO:0031625; GO:0043005; GO:0043025; GO:0043523; GO:0047497; GO:0048812; GO:0051881; GO:0060613; GO:0061136; GO:0072520; GO:0097009; GO:1902255; GO:1902527
TRINITY_DN1996_c0_g1_i5	28.56	28.53	6.09387e-07	0.175226	Upregulated	SA-p vs SA	U17LH_HUMAN	Ubiquitin carboxyl-terminal hydrolase 17-like protein 17 (EC 3.4.19.12)	USP17L17		protein deubiquitination [GO:0016579]; proteolysis [GO:0006508]; regulation of apoptotic process [GO:0042981]; regulation of protein stability [GO:0031647]	cytosol [GO:0005829]; endoplasmic reticulum [GO:0005783]; nucleus [GO:0005634]	cysteine-type deubiquitinase activity [GO:0004843]		USP17L17	3.4.19.12	FUNCTION: Deubiquitinating enzyme that removes conjugated ubiquitin from specific proteins to regulate different cellular processes that may include cell proliferation, progression through the cell cycle, apoptosis, cell migration, and the cellular response to viral infection. {ECO:0000250}.	Homo sapiens (Human)	U17LH_HUMAN	UPI0000160391	cytosol [GO:0005829]; endoplasmic reticulum [GO:0005783]; nucleus [GO:0005634]; cysteine-type deubiquitinase activity [GO:0004843]; protein deubiquitination [GO:0016579]; proteolysis [GO:0006508]; regulation of apoptotic process [GO:0042981]; regulation of protein stability [GO:0031647]	GO:0004843; GO:0005634; GO:0005783; GO:0005829; GO:0006508; GO:0016579; GO:0031647; GO:0042981
TRINITY_DN136_c0_g2_i1	557	1	2.79569e-27	-0.624414	Downregulated	SA-p vs SA	TYRA_STAAW	Prephenate dehydrogenase (PDH) (EC 1.3.1.12)	tyrA MW1252	PATHWAY: Amino-acid biosynthesis; L-tyrosine biosynthesis; (4-hydroxyphenyl)pyruvate from prephenate (NAD(+) route): step 1/1.	tyrosine biosynthetic process [GO:0006571]		NAD+ binding [GO:0070403]; prephenate dehydrogenase (NAD+) activity [GO:0008977]; prephenate dehydrogenase (NADP+) activity [GO:0004665]		tyrA	1.3.1.12		Staphylococcus aureus (strain MW2)	TYRA_STAAW	UPI00000D9DD5	NAD+ binding [GO:0070403]; prephenate dehydrogenase (NAD+) activity [GO:0008977]; prephenate dehydrogenase (NADP+) activity [GO:0004665]; tyrosine biosynthetic process [GO:0006571]	GO:0004665; GO:0006571; GO:0008977; GO:0070403
TRINITY_DN51273_c0_g1_i1	3	3	5.09565e-40	0.175359	Upregulated	SA-p vs SA	TSPYA_HUMAN	Testis-specific Y-encoded protein 10	TSPY10		cell differentiation [GO:0030154]; gonadal mesoderm development [GO:0007506]; nucleosome assembly [GO:0006334]; spermatogenesis [GO:0007283]	chromatin [GO:0000785]; cytoplasm [GO:0005737]; nucleus [GO:0005634]	chromatin binding [GO:0003682]; histone binding [GO:0042393]		TSPY10		FUNCTION: May be involved in sperm differentiation and proliferation. {ECO:0000250|UniProtKB:Q01534}.	Homo sapiens (Human)	TSPYA_HUMAN	UPI000013E91A	chromatin [GO:0000785]; cytoplasm [GO:0005737]; nucleus [GO:0005634]; chromatin binding [GO:0003682]; histone binding [GO:0042393]; cell differentiation [GO:0030154]; gonadal mesoderm development [GO:0007506]; nucleosome assembly [GO:0006334]; spermatogenesis [GO:0007283]	GO:0000785; GO:0003682; GO:0005634; GO:0005737; GO:0006334; GO:0007283; GO:0007506; GO:0030154; GO:0042393
TRINITY_DN384_c0_g2_i1	18	57111	2.1897e-295	1.19521	Upregulated	SA-p vs SA	TSAE_SHIFL	tRNA threonylcarbamoyladenosine biosynthesis protein TsaE (t(6)A37 threonylcarbamoyladenosine biosynthesis protein TsaE)	tsaE yjeE SF4323 S4591		tRNA threonylcarbamoyladenosine modification [GO:0002949]	cytoplasm [GO:0005737]	ATP binding [GO:0005524]; metal ion binding [GO:0046872]		tsaE		FUNCTION: Required for the formation of a threonylcarbamoyl group on adenosine at position 37 (t(6)A37) in tRNAs that read codons beginning with adenine. Is involved in the transfer of the threonylcarbamoyl moiety of threonylcarbamoyl-AMP (TC-AMP) to the N6 group of A37, together with TsaD and TsaB. TsaE seems to play an indirect role in the t(6)A biosynthesis pathway, possibly in regulating the …	Shigella flexneri	TSAE_SHIFL	UPI0000034198	cytoplasm [GO:0005737]; ATP binding [GO:0005524]; metal ion binding [GO:0046872]; tRNA threonylcarbamoyladenosine modification [GO:0002949]	GO:0002949; GO:0005524; GO:0005737; GO:0046872
TRINITY_DN3331_c0_g1_i1	636	1	5.2704e-30	-0.641192	Downregulated	SA-p vs SA	TSAD_STAA2	tRNA N6-adenosine threonylcarbamoyltransferase (EC 2.3.1.234) (N6-L-threonylcarbamoyladenine synthase) (t(6)A synthase) (t(6)A37 threonylcarbamoyladenosine biosynthesis protein TsaD) (tRNA threonylcarbamoyladenosine biosynthesis protein TsaD)	tsaD gcp SaurJH1_2123		tRNA threonylcarbamoyladenosine modification [GO:0002949]	cytoplasm [GO:0005737]	iron ion binding [GO:0005506]; N(6)-L-threonylcarbamoyladenine synthase activity [GO:0061711]		tsaD	2.3.1.234	FUNCTION: Required for the formation of a threonylcarbamoyl group on adenosine at position 37 (t(6)A37) in tRNAs that read codons beginning with adenine. Is involved in the transfer of the threonylcarbamoyl moiety of threonylcarbamoyl-AMP (TC-AMP) to the N6 group of A37, together with TsaE and TsaB. TsaD likely plays a direct catalytic role in this reaction. {ECO:0000255|HAMAP-Rule:MF_01445}.	Staphylococcus aureus (strain JH1)	TSAD_STAA2	UPI00006E3003	cytoplasm [GO:0005737]; iron ion binding [GO:0005506]; N(6)-L-threonylcarbamoyladenine synthase activity [GO:0061711]; tRNA threonylcarbamoyladenosine modification [GO:0002949]	GO:0002949; GO:0005506; GO:0005737; GO:0061711
TRINITY_DN689_c0_g2_i1	18	21783	1.45105e-253	1.07329	Upregulated	SA-p vs SA	TRPO_PSEAE	Putative transcriptional regulator	PA0034		phosphorelay signal transduction system [GO:0000160]; regulation of DNA-templated transcription [GO:0006355]		DNA binding [GO:0003677]				FUNCTION: Probable transcriptional regulator.	Pseudomonas aeruginosa (strain ATCC 15692 / DSM 22644 / CIP 104116 / JCM 14847 / LMG 12228 / 1C / PRS 101 / PAO1)	TRPO_PSEAE	UPI000013763B	DNA binding [GO:0003677]; phosphorelay signal transduction system [GO:0000160]; regulation of DNA-templated transcription [GO:0006355]	GO:0000160; GO:0003677; GO:0006355
TRINITY_DN45391_c0_g1_i1	1	15006	2.13077e-237	1.39176	Upregulated	SA-p vs SA	TREA_PSEAE	Periplasmic trehalase (EC 3.2.1.28) (Alpha,alpha-trehalase) (Alpha,alpha-trehalose glucohydrolase)	treA PA2416		cellular catabolic process [GO:0044248]; cellular hyperosmotic response [GO:0071474]; trehalose catabolic process [GO:0005993]	periplasmic space [GO:0042597]	alpha,alpha-trehalase activity [GO:0004555]; trehalase activity [GO:0015927]		treA	3.2.1.28	FUNCTION: Provides the cells with the ability to utilize trehalose at high osmolarity by splitting it into glucose molecules that can subsequently be taken up by the phosphotransferase-mediated uptake system. {ECO:0000255|HAMAP-Rule:MF_01060}.	Pseudomonas aeruginosa (strain ATCC 15692 / DSM 22644 / CIP 104116 / JCM 14847 / LMG 12228 / 1C / PRS 101 / PAO1)	TREA_PSEAE	UPI00000C56BF	periplasmic space [GO:0042597]; alpha,alpha-trehalase activity [GO:0004555]; trehalase activity [GO:0015927]; cellular catabolic process [GO:0044248]; cellular hyperosmotic response [GO:0071474]; trehalose catabolic process [GO:0005993]	GO:0004555; GO:0005993; GO:0015927; GO:0042597; GO:0044248; GO:0071474
TRINITY_DN4933_c0_g1_i1	11	4469	5.26512e-185	0.935219	Upregulated	SA-p vs SA	TPMT_PSEAB	Thiopurine S-methyltransferase (EC 2.1.1.67) (Thiopurine methyltransferase)	tpm PA14_27460		methylation [GO:0032259]; response to metal ion [GO:0010038]	cytoplasm [GO:0005737]	thiopurine S-methyltransferase activity [GO:0008119]		tpm	2.1.1.67		Pseudomonas aeruginosa (strain UCBPP-PA14)	TPMT_PSEAB	UPI0000395EFB	cytoplasm [GO:0005737]; thiopurine S-methyltransferase activity [GO:0008119]; methylation [GO:0032259]; response to metal ion [GO:0010038]	GO:0005737; GO:0008119; GO:0010038; GO:0032259
TRINITY_DN31943_c0_g1_i1	8	18	4.32752e-27	0.277938	Upregulated	SA-p vs SA	TPM1_CHEAU	Tropomyosin alpha-1 chain (Alpha-tropomyosin) (Tropomyosin-1)				actin cytoskeleton [GO:0015629]; cytoplasm [GO:0005737]	actin filament binding [GO:0051015]; identical protein binding [GO:0042802]; protein heterodimerization activity [GO:0046982]; protein homodimerization activity [GO:0042803]				FUNCTION: Binds to actin filaments in muscle and non-muscle cells. Plays a central role, in association with the troponin complex, in the calcium dependent regulation of vertebrate striated muscle contraction. Smooth muscle contraction is regulated by interaction with caldesmon. In non-muscle cells is implicated in stabilizing cytoskeleton actin filaments. {ECO:0000250|UniProtKB:P09493, ECO:00002…	Chelon auratus (Golden grey mullet) (Liza aurata)	TPM1_CHEAU	UPI00000FB5D1	actin cytoskeleton [GO:0015629]; cytoplasm [GO:0005737]; actin filament binding [GO:0051015]; identical protein binding [GO:0042802]; protein heterodimerization activity [GO:0046982]; protein homodimerization activity [GO:0042803]	GO:0005737; GO:0015629; GO:0042802; GO:0042803; GO:0046982; GO:0051015
TRINITY_DN36836_c0_g1_i1	13	21	3.36881e-07	0.236023	Upregulated	SA-p vs SA	TPM_MACRS	Tropomyosin Mac r 1.0101 (Major allergen Mac r 1.0101) (allergen Mac r 1.0101)			locomotion [GO:0040011]; muscle system process [GO:0003012]; regulation of muscle contraction [GO:0006937]		protein homodimerization activity [GO:0042803]				FUNCTION: Tropomyosin, in association with the troponin complex, plays a central role in the calcium dependent regulation of muscle contraction. {ECO:0000250|UniProtKB:Q22866}.	Macrobrachium rosenbergii (Giant fresh water prawn)	TPM_MACRS	UPI0003C94979	protein homodimerization activity [GO:0042803]; locomotion [GO:0040011]; muscle system process [GO:0003012]; regulation of muscle contraction [GO:0006937]	GO:0003012; GO:0006937; GO:0040011; GO:0042803
TRINITY_DN32_c1_g1_i1	1	2145	2.10172e-153	1.14569	Upregulated	SA-p vs SA	TONB_PSEAE	Protein TonB	tonB PA5531		bacterial-type flagellum-dependent swarming motility [GO:0071978]; cellular response to antibiotic [GO:0071236]; iron import into cell [GO:0033212]; protein transport [GO:0015031]; siderophore transport [GO:0015891]; single-species biofilm formation [GO:0044010]; transmembrane transport [GO:0055085]; type IV pilus-dependent motility [GO:0043107]	outer membrane-bounded periplasmic space [GO:0030288]; plasma membrane protein complex [GO:0098797]	energy transducer activity [GO:0031992]		tonB		FUNCTION: Interacts with outer membrane receptor proteins that carry out high-affinity binding and energy dependent uptake into the periplasmic space of specific substrates. It could act to transduce energy from the cytoplasmic membrane to specific energy-requiring processes in the outer membrane, resulting in the release into the periplasm of ligands bound by these outer membrane proteins (By si…	Pseudomonas aeruginosa (strain ATCC 15692 / DSM 22644 / CIP 104116 / JCM 14847 / LMG 12228 / 1C / PRS 101 / PAO1)	TONB_PSEAE	UPI0000137125	outer membrane-bounded periplasmic space [GO:0030288]; plasma membrane protein complex [GO:0098797]; energy transducer activity [GO:0031992]; bacterial-type flagellum-dependent swarming motility [GO:0071978]; cellular response to antibiotic [GO:0071236]; iron import into cell [GO:0033212]; protein transport [GO:0015031]; siderophore transport [GO:0015891]; single-species biofilm formation [GO:004…	GO:0015031; GO:0015891; GO:0030288; GO:0031992; GO:0033212; GO:0043107; GO:0044010; GO:0055085; GO:0071236; GO:0071978; GO:0098797
TRINITY_DN3364_c0_g2_i2	2	26457	5.43506e-262	1.37581	Upregulated	SA-p vs SA	TOLR_PSEAE	Tol-Pal system protein TolR	tolR PA0970		cell division [GO:0051301]; protein transport [GO:0015031]	plasma membrane [GO:0005886]	transmembrane transporter activity [GO:0022857]		tolR		FUNCTION: Part of the Tol-Pal system, which plays a role in outer membrane invagination during cell division and is important for maintaining outer membrane integrity. {ECO:0000255|HAMAP-Rule:MF_02203}.	Pseudomonas aeruginosa (strain ATCC 15692 / DSM 22644 / CIP 104116 / JCM 14847 / LMG 12228 / 1C / PRS 101 / PAO1)	TOLR_PSEAE	UPI0000137116	plasma membrane [GO:0005886]; transmembrane transporter activity [GO:0022857]; cell division [GO:0051301]; protein transport [GO:0015031]	GO:0005886; GO:0015031; GO:0022857; GO:0051301
TRINITY_DN51652_c0_g1_i1	7	11	2.18566e-29	0.232533	Upregulated	SA-p vs SA	TNNT3_COTJA	Troponin T, fast skeletal muscle isoforms	TNNT3		regulation of muscle contraction [GO:0006937]; sarcomere organization [GO:0045214]; skeletal muscle contraction [GO:0003009]	troponin complex [GO:0005861]	tropomyosin binding [GO:0005523]; troponin C binding [GO:0030172]; troponin I binding [GO:0031013]		TNNT3		FUNCTION: Troponin T is the tropomyosin-binding subunit of troponin, the thin filament regulatory complex which confers calcium-sensitivity to striated muscle actomyosin ATPase activity.	Coturnix japonica (Japanese quail) (Coturnix coturnix japonica)	TNNT3_COTJA	UPI00001711E2	troponin complex [GO:0005861]; tropomyosin binding [GO:0005523]; troponin C binding [GO:0030172]; troponin I binding [GO:0031013]; regulation of muscle contraction [GO:0006937]; sarcomere organization [GO:0045214]; skeletal muscle contraction [GO:0003009]	GO:0003009; GO:0005523; GO:0005861; GO:0006937; GO:0030172; GO:0031013; GO:0045214
TRINITY_DN1389_c0_g1_i3	4.02	16.97	8.16516e-214	0.357533	Upregulated	SA-p vs SA	TNNT_PERAM	Troponin T (TnT)	TNT		muscle contraction [GO:0006936]; regulation of muscle contraction [GO:0006937]; sarcomere organization [GO:0045214]	troponin complex [GO:0005861]	tropomyosin binding [GO:0005523]		TNT		FUNCTION: Troponin T is the tropomyosin-binding subunit of troponin, the thin filament regulatory complex which confers calcium-sensitivity to striated muscle actomyosin ATPase activity. {ECO:0000250}.	Periplaneta americana (American cockroach) (Blatta americana)	TNNT_PERAM	UPI00000814F7	troponin complex [GO:0005861]; tropomyosin binding [GO:0005523]; muscle contraction [GO:0006936]; regulation of muscle contraction [GO:0006937]; sarcomere organization [GO:0045214]	GO:0005523; GO:0005861; GO:0006936; GO:0006937; GO:0045214
TRINITY_DN17374_c0_g1_i1	3	6	3.43414e-146	0.263039	Upregulated	SA-p vs SA	TNNI2_COTJA	Troponin I, fast skeletal muscle (Troponin I, fast-twitch isoform)	TNNI2		cardiac muscle contraction [GO:0060048]; skeletal muscle contraction [GO:0003009]	troponin complex [GO:0005861]	actin binding [GO:0003779]		TNNI2		FUNCTION: Troponin I is the inhibitory subunit of troponin, the thin filament regulatory complex which confers calcium-sensitivity to striated muscle actomyosin ATPase activity.	Coturnix japonica (Japanese quail) (Coturnix coturnix japonica)	TNNI2_COTJA	UPI00001711E5	troponin complex [GO:0005861]; actin binding [GO:0003779]; cardiac muscle contraction [GO:0060048]; skeletal muscle contraction [GO:0003009]	GO:0003009; GO:0003779; GO:0005861; GO:0060048
TRINITY_DN6536_c0_g1_i1	41	46	3.46905e-10	0.189915	Upregulated	SA-p vs SA	TNNI_ASTLP	Troponin I (TnI)			muscle contraction [GO:0006936]	troponin complex [GO:0005861]	actin binding [GO:0003779]				FUNCTION: Troponin I is the actomyosin ATPase inhibitory subunit present in the thin filament regulatory complex.	Astacus leptodactylus (Turkish narrow-clawed crayfish) (Pontastacus leptodactylus)	TNNI_ASTLP	UPI00001373B0	troponin complex [GO:0005861]; actin binding [GO:0003779]; muscle contraction [GO:0006936]	GO:0003779; GO:0005861; GO:0006936
TRINITY_DN15123_c0_g1_i1	4	11	5.82322e-22	0.303322	Upregulated	SA-p vs SA	TNNC2_ANGAN	Troponin C, skeletal muscle (TNC)				myosin II complex [GO:0016460]	calcium ion binding [GO:0005509]				FUNCTION: Troponin is the central regulatory protein of striated muscle contraction. Tn consists of three components: Tn-I which is the inhibitor of actomyosin ATPase, Tn-T which contains the binding EF-hand for tropomyosin and Tn-C. The binding of calcium to Tn-C abolishes the inhibitory action of Tn on actin filaments.	Anguilla anguilla (European freshwater eel) (Muraena anguilla)	TNNC2_ANGAN	UPI00001371C4	myosin II complex [GO:0016460]; calcium ion binding [GO:0005509]	GO:0005509; GO:0016460
TRINITY_DN5987_c0_g1_i1	11	16	2.84737e-05	0.222756	Upregulated	SA-p vs SA	TNNC1_HOMAM	Troponin C, isoform 1				myosin II complex [GO:0016460]	calcium ion binding [GO:0005509]				FUNCTION: Troponin is the central regulatory protein of striated muscle contraction. Tn consists of three components: Tn-I which is the inhibitor of actomyosin ATPase, Tn-T which contains the binding site for tropomyosin and Tn-C. The binding of calcium to Tn-C abolishes the inhibitory action of Tn on actin filaments.	Homarus americanus (American lobster)	TNNC1_HOMAM	UPI00001371BB	myosin II complex [GO:0016460]; calcium ion binding [GO:0005509]	GO:0005509; GO:0016460
TRINITY_DN56_c2_g1_i1	12	948	9.4105e-119	0.728073	Upregulated	SA-p vs SA	TLPQ_PSEAE	Methyl-accepting chemotaxis protein TlpQ (TlpQ chemoreceptor)	tlpQ PA2654		chemotaxis [GO:0006935]; signal transduction [GO:0007165]	plasma membrane [GO:0005886]			tlpQ		FUNCTION: Chemotactic-signal transducers respond to changes in the concentration of attractants and repellents in the environment, transduce a signal from the outside to the inside of the cell, and facilitate sensory adaptation through the variation of the level of methylation. TlpQ is a chemoreceptor that binds and mediates chemotaxis to histamine, a key biological signaling molecule. It binds h…	Pseudomonas aeruginosa (strain ATCC 15692 / DSM 22644 / CIP 104116 / JCM 14847 / LMG 12228 / 1C / PRS 101 / PAO1)	TLPQ_PSEAE	UPI00000C578E	plasma membrane [GO:0005886]; chemotaxis [GO:0006935]; signal transduction [GO:0007165]	GO:0005886; GO:0006935; GO:0007165
TRINITY_DN8147_c0_g1_i1	2	6853	1.85898e-203	1.20494	Upregulated	SA-p vs SA	THTR_PSEAE	Thiosulfate sulfurtransferase (TST) (EC 2.8.1.1) (Rhodanese RhdA) (Thiosulfate:cyanide sulfurtransferase)	rhdA PA4956		response to toxic substance [GO:0009636]	cytoplasm [GO:0005737]	thiosulfate sulfurtransferase activity [GO:0004792]		rhdA	2.8.1.1	FUNCTION: Catalyzes the sulfur transfer reaction from thiosulfate to cyanide, thus converting cyanide to the less toxic thiocyanate (PubMed:15522204). Contributes to P.aeruginosa survival under cyanogenic conditions, and thus provides the bacterium with a defense mechanism against endogenous cyanide toxicity (PubMed:17098912). Is the main cytoplasmic rhodanese in P.aeruginosa, accounting for 90% …	Pseudomonas aeruginosa (strain ATCC 15692 / DSM 22644 / CIP 104116 / JCM 14847 / LMG 12228 / 1C / PRS 101 / PAO1)	THTR_PSEAE	UPI00000C5E93	cytoplasm [GO:0005737]; thiosulfate sulfurtransferase activity [GO:0004792]; response to toxic substance [GO:0009636]	GO:0004792; GO:0005737; GO:0009636
TRINITY_DN35722_c0_g1_i1	1	411	3.77657e-84	0.936682	Upregulated	SA-p vs SA	THRH_PSEAE	Phosphoserine phosphatase ThrH (PSP) (PSPase) (EC 3.1.3.3)	thrH PA1757	PATHWAY: Amino-acid biosynthesis; L-serine biosynthesis; L-serine from 3-phospho-D-glycerate: step 3/3.	dephosphorylation [GO:0016311]; L-serine biosynthetic process [GO:0006564]; tetrahydrofolate biosynthetic process [GO:0046654]; threonine biosynthetic process [GO:0009088]	cytoplasm [GO:0005737]	4-amino-4-deoxychorismate synthase activity [GO:0046820]; L-phosphoserine phosphatase activity [GO:0036424]; magnesium ion binding [GO:0000287]; phosphoserine:homoserine phosphotransferase activity [GO:0043899]		thrH	3.1.3.3	FUNCTION: Phosphoserine phosphatase that mediates dephosphorylation of phosphoserine in the serine biosynthesis pathway. Also able to dephosphorylate other substrates such as phospho-L(or D)-threonine, with lower activity. Shows phosphoserine:homoserine phosphotransferase activity by transferring the phosphoryl group to homoserine using phosphoserine as the phosphoryl group donor. {ECO:0000269|Pu…	Pseudomonas aeruginosa (strain ATCC 15692 / DSM 22644 / CIP 104116 / JCM 14847 / LMG 12228 / 1C / PRS 101 / PAO1)	THRH_PSEAE	UPI00000C5480	cytoplasm [GO:0005737]; 4-amino-4-deoxychorismate synthase activity [GO:0046820]; L-phosphoserine phosphatase activity [GO:0036424]; magnesium ion binding [GO:0000287]; phosphoserine:homoserine phosphotransferase activity [GO:0043899]; dephosphorylation [GO:0016311]; L-serine biosynthetic process [GO:0006564]; tetrahydrofolate biosynthetic process [GO:0046654]; threonine biosynthetic process [GO:…	GO:0000287; GO:0005737; GO:0006564; GO:0009088; GO:0016311; GO:0036424; GO:0043899; GO:0046654; GO:0046820
TRINITY_DN303_c0_g1_i7	1672.06	6	6.087e-48	-0.536815	Downregulated	SA-p vs SA	THLA_STAA8	Probable acetyl-CoA acyltransferase (EC 2.3.1.9) (Acetoacetyl-CoA thiolase)	SAOUHSC_00336			cytoplasm [GO:0005737]	acetyl-CoA C-acetyltransferase activity [GO:0003985]			2.3.1.9		Staphylococcus aureus (strain NCTC 8325 / PS 47)	THLA_STAA8	UPI000005456C	cytoplasm [GO:0005737]; acetyl-CoA C-acetyltransferase activity [GO:0003985]	GO:0003985; GO:0005737
TRINITY_DN765_c0_g2_i1	1	2185	3.35287e-154	1.14803	Upregulated	SA-p vs SA	THIC_PSEA7	Phosphomethylpyrimidine synthase (EC 4.1.99.17) (Hydroxymethylpyrimidine phosphate synthase) (HMP-P synthase) (HMP-phosphate synthase) (HMPP synthase) (Thiamine biosynthesis protein ThiC)	thiC PSPA7_5702	PATHWAY: Cofactor biosynthesis; thiamine diphosphate biosynthesis. {ECO:0000255|HAMAP-Rule:MF_00089}.	thiamine biosynthetic process [GO:0009228]; thiamine diphosphate biosynthetic process [GO:0009229]	cytosol [GO:0005829]	4 iron, 4 sulfur cluster binding [GO:0051539]; carbon-carbon lyase activity [GO:0016830]; zinc ion binding [GO:0008270]		thiC	4.1.99.17	FUNCTION: Catalyzes the synthesis of the hydroxymethylpyrimidine phosphate (HMP-P) moiety of thiamine from aminoimidazole ribotide (AIR) in a radical S-adenosyl-L-methionine (SAM)-dependent reaction. {ECO:0000255|HAMAP-Rule:MF_00089}.	Pseudomonas aeruginosa (strain PA7)	THIC_PSEA7	UPI0000D727AA	cytosol [GO:0005829]; 4 iron, 4 sulfur cluster binding [GO:0051539]; carbon-carbon lyase activity [GO:0016830]; zinc ion binding [GO:0008270]; thiamine biosynthetic process [GO:0009228]; thiamine diphosphate biosynthetic process [GO:0009229]	GO:0005829; GO:0008270; GO:0009228; GO:0009229; GO:0016830; GO:0051539
TRINITY_DN1501_c1_g1_i1	1	447	1.65735e-87	0.947303	Upregulated	SA-p vs SA	TFPB_ACIAD	Type IV pilus assembly ATPase TfpB (Type four pilus PilB-like protein)	tfpB ACIAD2241			cytoplasm [GO:0005737]; plasma membrane [GO:0005886]	ATP binding [GO:0005524]; ATP hydrolysis activity [GO:0016887]; metal ion binding [GO:0046872]		tfpB		FUNCTION: ATPase component of the type IV pilus (T4P) (By similarity). Acts as a molecular motor to provide the energy that is required for biogenesis of the pilus and the extrusion of substrates generated in the cytoplasm (By similarity). TfpB is required for optimal T4P extension and, consequently, efficient natural transformation. May play a role in initiating T4P extension (PubMed:34145281). …	Acinetobacter baylyi (strain ATCC 33305 / BD413 / ADP1)	TFPB_ACIAD	UPI00003B79DA	cytoplasm [GO:0005737]; plasma membrane [GO:0005886]; ATP binding [GO:0005524]; ATP hydrolysis activity [GO:0016887]; metal ion binding [GO:0046872]	GO:0005524; GO:0005737; GO:0005886; GO:0016887; GO:0046872
TRINITY_DN15036_c0_g1_i2	14	22.81	7.82344e-08	0.237107	Upregulated	SA-p vs SA	TFKLJ_HUMAN	TATA-box-binding protein-associated factor 11-like protein 10	TAF11L10		RNA polymerase II preinitiation complex assembly [GO:0051123]	transcription factor TFIID complex [GO:0005669]	protein heterodimerization activity [GO:0046982]		TAF11L10			Homo sapiens (Human)	TFKLJ_HUMAN	UPI0000419236	transcription factor TFIID complex [GO:0005669]; protein heterodimerization activity [GO:0046982]; RNA polymerase II preinitiation complex assembly [GO:0051123]	GO:0005669; GO:0046982; GO:0051123
TRINITY_DN43_c0_g3_i2	55	53440.6	7.67574e-279	1.04552	Upregulated	SA-p vs SA	TERE_ALCSP	Tellurium resistance protein TerE	terE		response to tellurium ion [GO:0046690]				terE		FUNCTION: Not known; seems to contribute to the tellurium resistance (Ter) mechanism.	Alcaligenes sp	TERE_ALCSP	UPI0000136BCF	response to tellurium ion [GO:0046690]	GO:0046690
TRINITY_DN612_c0_g4_i1	2335	1	5.67658e-66	-0.805707	Downregulated	SA-p vs SA	TENA_STAAM	Aminopyrimidine aminohydrolase (EC 3.5.99.2) (Thiaminase II)	tenA SAV2094	PATHWAY: Cofactor biosynthesis; thiamine diphosphate biosynthesis. {ECO:0000250|UniProtKB:P25052}.	thiamine biosynthetic process [GO:0009228]; thiamine diphosphate biosynthetic process [GO:0009229]	cytosol [GO:0005829]	thiaminase activity [GO:0050334]		tenA	3.5.99.2	FUNCTION: Catalyzes an amino-pyrimidine hydrolysis reaction at the C5' of the pyrimidine moiety of thiamine compounds, a reaction that is part of a thiamine salvage pathway. Thus, catalyzes the conversion of 4-amino-5-aminomethyl-2-methylpyrimidine to 4-amino-5-hydroxymethyl-2-methylpyrimidine (HMP). Is also able to catalyze the hydrolytic cleavage of thiamine; however, this thiaminase activity m…	Staphylococcus aureus (strain Mu50 / ATCC 700699)	TENA_STAAM	UPI00000D76DB	cytosol [GO:0005829]; thiaminase activity [GO:0050334]; thiamine biosynthetic process [GO:0009228]; thiamine diphosphate biosynthetic process [GO:0009229]	GO:0005829; GO:0009228; GO:0009229; GO:0050334
TRINITY_DN28677_c0_g1_i1	3	3	0.00057344	0.175359	Upregulated	SA-p vs SA	TCTP_PANTR	Translationally-controlled tumor protein (TCTP)	TPT1			cytoplasm [GO:0005737]	calcium ion binding [GO:0005509]		TPT1		FUNCTION: Involved in calcium binding and microtubule stabilization (By similarity). Acts as a negative regulator of TSC22D1-mediated apoptosis, via interaction with and destabilization of TSC22D1 protein (By similarity). {ECO:0000250|UniProtKB:P13693}.	Pan troglodytes (Chimpanzee)	TCTP_PANTR	UPI0000000FED	cytoplasm [GO:0005737]; calcium ion binding [GO:0005509]	GO:0005509; GO:0005737
TRINITY_DN8571_c0_g1_i1	1	4	6.81463e-10	0.350719	Upregulated	SA-p vs SA	TCTP_LATJA	Translationally-controlled tumor protein homolog (TCTP)	tpt1 tctp			cytoplasm [GO:0005737]	calcium ion binding [GO:0005509]		tpt1		FUNCTION: Involved in calcium binding and microtubule stabilization. {ECO:0000250}.	Lateolabrax japonicus (Japanese sea perch) (Japanese sea bass)	TCTP_LATJA	UPI0000226363	cytoplasm [GO:0005737]; calcium ion binding [GO:0005509]	GO:0005509; GO:0005737
TRINITY_DN2344_c0_g2_i4	1005.55	2	3.96676e-39	-0.611458	Downregulated	SA-p vs SA	TCAA_STAAB	Membrane-associated protein TcaA	tcaA SAB2235c		response to antibiotic [GO:0046677]	plasma membrane [GO:0005886]	metal ion binding [GO:0046872]		tcaA		FUNCTION: Plays a major role in decreasing resistance to glycopeptide antibiotics. {ECO:0000250}.	Staphylococcus aureus (strain bovine RF122 / ET3-1)	TCAA_STAAB	UPI00005FE77A	plasma membrane [GO:0005886]; metal ion binding [GO:0046872]; response to antibiotic [GO:0046677]	GO:0005886; GO:0046677; GO:0046872
TRINITY_DN41611_c0_g1_i1	2	9	3.25942e-11	0.365618	Upregulated	SA-p vs SA	TBC3K_HUMAN	TBC1 domain family member 3K	TBC1D3K			plasma membrane [GO:0005886]	GTPase activator activity [GO:0005096]		TBC1D3K		FUNCTION: Acts as a GTPase activating protein for RAB5. Does not act on RAB4 or RAB11 (By similarity). {ECO:0000250|UniProtKB:Q8IZP1}.	Homo sapiens (Human)	TBC3K_HUMAN	UPI000292EF8E	plasma membrane [GO:0005886]; GTPase activator activity [GO:0005096]	GO:0005096; GO:0005886
TRINITY_DN14212_c0_g1_i1	7	5	1.79596e-53	0.132797	Upregulated	SA-p vs SA	TBC3E_HUMAN	TBC1 domain family member 3E	TBC1D3E			plasma membrane [GO:0005886]	GTPase activator activity [GO:0005096]		TBC1D3E		FUNCTION: Acts as a GTPase activating protein for RAB5. Does not act on RAB4 or RAB11 (By similarity). {ECO:0000250|UniProtKB:Q8IZP1}.	Homo sapiens (Human)	TBC3E_HUMAN	UPI000292EE19	plasma membrane [GO:0005886]; GTPase activator activity [GO:0005096]	GO:0005096; GO:0005886
TRINITY_DN1147_c0_g1_i4	629	1	9.67339e-30	-0.639792	Downregulated	SA-p vs SA	TARA_STAAU	N-acetylglucosaminyldiphosphoundecaprenol N-acetyl-beta-D-mannosaminyltransferase (EC 2.4.1.187) (N-acetylmannosaminyltransferase) (UDP-N-acetylmannosamine transferase) (UDP-N-acetylmannosamine:N-acetylglucosaminyl pyrophosphorylundecaprenol N-acetylmannosaminyltransferase)	tarA	PATHWAY: Cell wall biogenesis; poly(ribitol phosphate) teichoic acid biosynthesis. {ECO:0000305}.	cell wall organization [GO:0071555]; teichoic acid biosynthetic process [GO:0019350]		N-acetylglucosaminyldiphosphoundecaprenol N-acetyl-beta-D-mannosaminyltransferase activity [GO:0047244]		tarA	2.4.1.187	FUNCTION: Catalyzes the conversion of GlcNAc-PP-undecaprenol into ManNAc-GlcNAc-PP-undecaprenol, the first committed lipid intermediate in the de novo synthesis of teichoic acid. {ECO:0000255|HAMAP-Rule:MF_02070}.	Staphylococcus aureus	TARA_STAAU	UPI0000052300	N-acetylglucosaminyldiphosphoundecaprenol N-acetyl-beta-D-mannosaminyltransferase activity [GO:0047244]; cell wall organization [GO:0071555]; teichoic acid biosynthetic process [GO:0019350]	GO:0019350; GO:0047244; GO:0071555
TRINITY_DN45300_c0_g1_i1	1	6230	2.46519e-199	1.28056	Upregulated	SA-p vs SA	TAL_PSEAE	Transaldolase (EC 2.2.1.2)	tal PA2796	PATHWAY: Carbohydrate degradation; pentose phosphate pathway; D-glyceraldehyde 3-phosphate and beta-D-fructose 6-phosphate from D-ribose 5-phosphate and D-xylulose 5-phosphate (non-oxidative stage): step 2/3. {ECO:0000255|HAMAP-Rule:MF_00492}.	carbohydrate metabolic process [GO:0005975]; pentose-phosphate shunt, non-oxidative branch [GO:0009052]	cytosol [GO:0005829]	transaldolase activity [GO:0004801]		tal	2.2.1.2	FUNCTION: Transaldolase is important for the balance of metabolites in the pentose-phosphate pathway. {ECO:0000255|HAMAP-Rule:MF_00492}.	Pseudomonas aeruginosa (strain ATCC 15692 / DSM 22644 / CIP 104116 / JCM 14847 / LMG 12228 / 1C / PRS 101 / PAO1)	TAL_PSEAE	UPI00001368B9	cytosol [GO:0005829]; transaldolase activity [GO:0004801]; carbohydrate metabolic process [GO:0005975]; pentose-phosphate shunt, non-oxidative branch [GO:0009052]	GO:0004801; GO:0005829; GO:0005975; GO:0009052
TRINITY_DN1261_c0_g1_i1	5	5835	1.65244e-196	1.06869	Upregulated	SA-p vs SA	TAL_PSEA8	Transaldolase (EC 2.2.1.2)	tal PLES_22761	PATHWAY: Carbohydrate degradation; pentose phosphate pathway; D-glyceraldehyde 3-phosphate and beta-D-fructose 6-phosphate from D-ribose 5-phosphate and D-xylulose 5-phosphate (non-oxidative stage): step 2/3. {ECO:0000255|HAMAP-Rule:MF_00492}.	carbohydrate metabolic process [GO:0005975]; pentose-phosphate shunt [GO:0006098]	cytosol [GO:0005829]	transaldolase activity [GO:0004801]		tal	2.2.1.2	FUNCTION: Transaldolase is important for the balance of metabolites in the pentose-phosphate pathway. {ECO:0000255|HAMAP-Rule:MF_00492}.	Pseudomonas aeruginosa (strain LESB58)	TAL_PSEA8	UPI000188FE69	cytosol [GO:0005829]; transaldolase activity [GO:0004801]; carbohydrate metabolic process [GO:0005975]; pentose-phosphate shunt [GO:0006098]	GO:0004801; GO:0005829; GO:0005975; GO:0006098
TRINITY_DN21196_c0_g2_i1	298	2	3.59921e-15	-0.457616	Downregulated	SA-p vs SA	TAIL_BPMR2	Putative tail protein (Putative major tail protein)	orf53			virus tail [GO:0098015]			orf53			Staphylococcus phage phiMR25	TAIL_BPMR2	UPI00000CAEAC	virus tail [GO:0098015]	GO:0098015
TRINITY_DN36059_c0_g1_i1	8	4446	9.00235e-185	0.974849	Upregulated	SA-p vs SA	TADA_HAEIN	tRNA-specific adenosine deaminase (EC 3.5.4.33)	tadA HI_0906		tRNA wobble adenosine to inosine editing [GO:0002100]		tRNA-specific adenosine-34 deaminase activity [GO:0052717]; zinc ion binding [GO:0008270]		tadA	3.5.4.33	FUNCTION: Catalyzes the deamination of adenosine to inosine at the wobble position 34 of tRNA(Arg2). {ECO:0000255|HAMAP-Rule:MF_00972}.	Haemophilus influenzae (strain ATCC 51907 / DSM 11121 / KW20 / Rd)	TADA_HAEIN	UPI000013AE90	tRNA-specific adenosine-34 deaminase activity [GO:0052717]; zinc ion binding [GO:0008270]; tRNA wobble adenosine to inosine editing [GO:0002100]	GO:0002100; GO:0008270; GO:0052717
TRINITY_DN817_c1_g1_i1	953	2	1.51607e-37	-0.604669	Downregulated	SA-p vs SA	SYS_STAAS	Serine--tRNA ligase (EC 6.1.1.11) (Seryl-tRNA synthetase) (SerRS) (Seryl-tRNA(Ser/Sec) synthetase)	serS SAS0009	PATHWAY: Aminoacyl-tRNA biosynthesis; selenocysteinyl-tRNA(Sec) biosynthesis; L-seryl-tRNA(Sec) from L-serine and tRNA(Sec): step 1/1. {ECO:0000255|HAMAP-Rule:MF_00176}.	selenocysteine biosynthetic process [GO:0016260]; seryl-tRNA aminoacylation [GO:0006434]	cytoplasm [GO:0005737]	ATP binding [GO:0005524]; serine-tRNA ligase activity [GO:0004828]; transferase activity [GO:0016740]		serS	6.1.1.11	FUNCTION: Catalyzes the attachment of serine to tRNA(Ser). Is also able to aminoacylate tRNA(Sec) with serine, to form the misacylated tRNA L-seryl-tRNA(Sec), which will be further converted into selenocysteinyl-tRNA(Sec). {ECO:0000255|HAMAP-Rule:MF_00176}.	Staphylococcus aureus (strain MSSA476)	SYS_STAAS	UPI00003B1A14	cytoplasm [GO:0005737]; ATP binding [GO:0005524]; serine-tRNA ligase activity [GO:0004828]; transferase activity [GO:0016740]; selenocysteine biosynthetic process [GO:0016260]; seryl-tRNA aminoacylation [GO:0006434]	GO:0004828; GO:0005524; GO:0005737; GO:0006434; GO:0016260; GO:0016740
TRINITY_DN524_c0_g2_i7	44.1	1	0.00962572	-0.303609	Downregulated	SA-p vs SA	SYL_STAAN	Leucine--tRNA ligase (EC 6.1.1.4) (Leucyl-tRNA synthetase) (LeuRS)	leuS SA1579		leucyl-tRNA aminoacylation [GO:0006429]	cytosol [GO:0005829]	aminoacyl-tRNA editing activity [GO:0002161]; ATP binding [GO:0005524]; leucine-tRNA ligase activity [GO:0004823]		leuS	6.1.1.4		Staphylococcus aureus (strain N315)	SYL_STAAN	UPI000002FBD2	cytosol [GO:0005829]; aminoacyl-tRNA editing activity [GO:0002161]; ATP binding [GO:0005524]; leucine-tRNA ligase activity [GO:0004823]; leucyl-tRNA aminoacylation [GO:0006429]	GO:0002161; GO:0004823; GO:0005524; GO:0005829; GO:0006429
TRINITY_DN42311_c0_g1_i1	5	3095	3.6859e-169	0.988484	Upregulated	SA-p vs SA	SYL_PSEAE	Leucine--tRNA ligase (EC 6.1.1.4) (Leucyl-tRNA synthetase) (LeuRS)	leuS PA3987		leucyl-tRNA aminoacylation [GO:0006429]	cytosol [GO:0005829]	aminoacyl-tRNA editing activity [GO:0002161]; ATP binding [GO:0005524]; leucine-tRNA ligase activity [GO:0004823]		leuS	6.1.1.4		Pseudomonas aeruginosa (strain ATCC 15692 / DSM 22644 / CIP 104116 / JCM 14847 / LMG 12228 / 1C / PRS 101 / PAO1)	SYL_PSEAE	UPI0000136570	cytosol [GO:0005829]; aminoacyl-tRNA editing activity [GO:0002161]; ATP binding [GO:0005524]; leucine-tRNA ligase activity [GO:0004823]; leucyl-tRNA aminoacylation [GO:0006429]	GO:0002161; GO:0004823; GO:0005524; GO:0005829; GO:0006429
TRINITY_DN16291_c0_g1_i1	189	1	3.03407e-11	-0.487696	Downregulated	SA-p vs SA	SYK_STAAW	Lysine--tRNA ligase (EC 6.1.1.6) (Lysyl-tRNA synthetase) (LysRS)	lysS MW0472		lysyl-tRNA aminoacylation [GO:0006430]	cytosol [GO:0005829]	ATP binding [GO:0005524]; lysine-tRNA ligase activity [GO:0004824]; magnesium ion binding [GO:0000287]; transferase activity [GO:0016740]; tRNA binding [GO:0000049]		lysS	6.1.1.6		Staphylococcus aureus (strain MW2)	SYK_STAAW	UPI00000D9CA8	cytosol [GO:0005829]; ATP binding [GO:0005524]; lysine-tRNA ligase activity [GO:0004824]; magnesium ion binding [GO:0000287]; transferase activity [GO:0016740]; tRNA binding [GO:0000049]; lysyl-tRNA aminoacylation [GO:0006430]	GO:0000049; GO:0000287; GO:0004824; GO:0005524; GO:0005829; GO:0006430; GO:0016740
TRINITY_DN420_c0_g2_i4	1094.47	1.26	2.9012e-43	-0.680622	Downregulated	SA-p vs SA	SYFA_STAAC	Phenylalanine--tRNA ligase alpha subunit (EC 6.1.1.20) (Phenylalanyl-tRNA synthetase alpha subunit) (PheRS)	pheS SACOL1148		phenylalanyl-tRNA aminoacylation [GO:0006432]	cytoplasm [GO:0005737]	ATP binding [GO:0005524]; magnesium ion binding [GO:0000287]; phenylalanine-tRNA ligase activity [GO:0004826]; transferase activity [GO:0016740]; tRNA binding [GO:0000049]		pheS	6.1.1.20		Staphylococcus aureus (strain COL)	SYFA_STAAC	UPI0000054401	cytoplasm [GO:0005737]; ATP binding [GO:0005524]; magnesium ion binding [GO:0000287]; phenylalanine-tRNA ligase activity [GO:0004826]; transferase activity [GO:0016740]; tRNA binding [GO:0000049]; phenylalanyl-tRNA aminoacylation [GO:0006432]	GO:0000049; GO:0000287; GO:0004826; GO:0005524; GO:0005737; GO:0006432; GO:0016740
TRINITY_DN1044_c0_g1_i5	159511	342	1.82307e-133	-0.601961	Downregulated	SA-p vs SA	SYD_STAHJ	Aspartate--tRNA ligase (EC 6.1.1.12) (Aspartyl-tRNA synthetase) (AspRS)	aspS SH1291		aspartyl-tRNA aminoacylation [GO:0006422]	cytoplasm [GO:0005737]	aspartate-tRNA ligase activity [GO:0004815]; ATP binding [GO:0005524]; nucleic acid binding [GO:0003676]; transferase activity [GO:0016740]		aspS	6.1.1.12	FUNCTION: Catalyzes the attachment of L-aspartate to tRNA(Asp) in a two-step reaction: L-aspartate is first activated by ATP to form Asp-AMP and then transferred to the acceptor end of tRNA(Asp). {ECO:0000255|HAMAP-Rule:MF_00044}.	Staphylococcus haemolyticus (strain JCSC1435)	SYD_STAHJ	UPI000054BA85	cytoplasm [GO:0005737]; aspartate-tRNA ligase activity [GO:0004815]; ATP binding [GO:0005524]; nucleic acid binding [GO:0003676]; transferase activity [GO:0016740]; aspartyl-tRNA aminoacylation [GO:0006422]	GO:0003676; GO:0004815; GO:0005524; GO:0005737; GO:0006422; GO:0016740
TRINITY_DN1029_c0_g1_i1	282	1	1.01148e-15	-0.538314	Downregulated	SA-p vs SA	SYD_STAAR	Aspartate--tRNA ligase (EC 6.1.1.12) (Aspartyl-tRNA synthetase) (AspRS)	aspS SAR1710		aspartyl-tRNA aminoacylation [GO:0006422]	cytoplasm [GO:0005737]	aspartate-tRNA ligase activity [GO:0004815]; ATP binding [GO:0005524]; nucleic acid binding [GO:0003676]; transferase activity [GO:0016740]		aspS	6.1.1.12	FUNCTION: Catalyzes the attachment of L-aspartate to tRNA(Asp) in a two-step reaction: L-aspartate is first activated by ATP to form Asp-AMP and then transferred to the acceptor end of tRNA(Asp). {ECO:0000255|HAMAP-Rule:MF_00044}.	Staphylococcus aureus (strain MRSA252)	SYD_STAAR	UPI00003B172F	cytoplasm [GO:0005737]; aspartate-tRNA ligase activity [GO:0004815]; ATP binding [GO:0005524]; nucleic acid binding [GO:0003676]; transferase activity [GO:0016740]; aspartyl-tRNA aminoacylation [GO:0006422]	GO:0003676; GO:0004815; GO:0005524; GO:0005737; GO:0006422; GO:0016740
TRINITY_DN635_c0_g1_i1	115	38203	5.95397e-245	0.909757	Upregulated	SA-p vs SA	SULA_PSEAE	Cell division inhibitor SulA	sulA PA3008		division septum assembly [GO:0000917]; DNA repair [GO:0006281]; negative regulation of cell division [GO:0051782]; SOS response [GO:0009432]				sulA		FUNCTION: Component of the SOS system and an inhibitor of cell division. Accumulation of SulA causes rapid cessation of cell division and the appearance of long, non-septate filaments. In the presence of GTP, binds a polymerization-competent form of FtsZ in a 1:1 ratio, thus inhibiting FtsZ polymerization and therefore preventing it from participating in the assembly of the Z ring. This mechanism…	Pseudomonas aeruginosa (strain ATCC 15692 / DSM 22644 / CIP 104116 / JCM 14847 / LMG 12228 / 1C / PRS 101 / PAO1)	SULA_PSEAE	UPI00000C58C4	division septum assembly [GO:0000917]; DNA repair [GO:0006281]; negative regulation of cell division [GO:0051782]; SOS response [GO:0009432]	GO:0000917; GO:0006281; GO:0009432; GO:0051782
TRINITY_DN950_c0_g2_i2	1942.68	4	3.12381e-55	-0.60708	Downregulated	SA-p vs SA	SUFA_BACSU	Uncharacterized protein SufA	sufA yutM BSU32160		iron-sulfur cluster assembly [GO:0016226]; protein maturation by iron-sulfur cluster transfer [GO:0097428]	cytoplasm [GO:0005737]	2 iron, 2 sulfur cluster binding [GO:0051537]		sufA			Bacillus subtilis (strain 168)	SUFA_BACSU	UPI00000609E0	cytoplasm [GO:0005737]; 2 iron, 2 sulfur cluster binding [GO:0051537]; iron-sulfur cluster assembly [GO:0016226]; protein maturation by iron-sulfur cluster transfer [GO:0097428]	GO:0005737; GO:0016226; GO:0051537; GO:0097428
TRINITY_DN1990_c0_g1_i7	2.87978e+06	4975	7.32052e-147	-0.629282	Downregulated	SA-p vs SA	SSRP_STAAN	SsrA-binding protein (Small protein B)	smpB ssrP SA0736		trans-translation [GO:0070929]	cytosol [GO:0005829]	RNA binding [GO:0003723]		smpB		FUNCTION: Required for rescue of stalled ribosomes mediated by trans-translation. Binds to transfer-messenger RNA (tmRNA), required for stable association of tmRNA with ribosomes. tmRNA and SmpB together mimic tRNA shape, replacing the anticodon stem-loop with SmpB. tmRNA is encoded by the ssrA gene; the 2 termini fold to resemble tRNA(Ala) and it encodes a 'tag peptide', a short internal open re…	Staphylococcus aureus (strain N315)	SSRP_STAAN	UPI000013602F	cytosol [GO:0005829]; RNA binding [GO:0003723]; trans-translation [GO:0070929]	GO:0003723; GO:0005829; GO:0070929
TRINITY_DN203_c0_g2_i3	73.9	1	7.45732e-05	-0.368913	Downregulated	SA-p vs SA	SSPB_STAAW	Staphopain B (EC 3.4.22.-) (Staphylococcal cysteine proteinase B) (Staphylopain B)	sspB MW0931		proteolysis [GO:0006508]	extracellular region [GO:0005576]	cysteine-type peptidase activity [GO:0008234]		sspB	3.4.22.-	FUNCTION: Cysteine protease that plays an important role in the inhibition of host innate immune response. Degrades host elastin, fibrogen, fibronectin and kininogen. Blocks phagocytosis of opsonised S.aureus by neutrophils and monocytes by inducing their death in a proteolytic activity-dependent manner. Decreases surface expression of the 'don't eat me' signal CD31 on neutrophils. Cleaves host g…	Staphylococcus aureus (strain MW2)	SSPB_STAAW	UPI00000D9D62	extracellular region [GO:0005576]; cysteine-type peptidase activity [GO:0008234]; proteolysis [GO:0006508]	GO:0005576; GO:0006508; GO:0008234
TRINITY_DN2746_c0_g3_i1	7685.9	6	1.96957e-102	-0.729762	Downregulated	SA-p vs SA	SSB2_STAAS	Single-stranded DNA-binding protein 2 (SSB 2)	ssb2 SAS0342		DNA recombination [GO:0006310]; DNA repair [GO:0006281]; DNA replication [GO:0006260]	nucleoid [GO:0009295]	single-stranded DNA binding [GO:0003697]		ssb2		FUNCTION: Plays an important role in DNA replication, recombination and repair. Binds to ssDNA and to an array of partner proteins to recruit them to their sites of action during DNA metabolism. {ECO:0000255|HAMAP-Rule:MF_00984}.	Staphylococcus aureus (strain MSSA476)	SSB2_STAAS	UPI0000054560	nucleoid [GO:0009295]; single-stranded DNA binding [GO:0003697]; DNA recombination [GO:0006310]; DNA repair [GO:0006281]; DNA replication [GO:0006260]	GO:0003697; GO:0006260; GO:0006281; GO:0006310; GO:0009295
TRINITY_DN76_c0_g1_i2	4334.56	1.95	1.49092e-85	-0.799481	Downregulated	SA-p vs SA	SSB1_STAAM	Single-stranded DNA-binding protein 1 (SSB 1)	ssb SAV1983		DNA recombination [GO:0006310]; DNA repair [GO:0006281]; DNA replication [GO:0006260]	nucleoid [GO:0009295]	single-stranded DNA binding [GO:0003697]		ssb		FUNCTION: Plays an important role in DNA replication, recombination and repair. Binds to ssDNA and to an array of partner proteins to recruit them to their sites of action during DNA metabolism. {ECO:0000255|HAMAP-Rule:MF_00984}.	Staphylococcus aureus (strain Mu50 / ATCC 700699)	SSB1_STAAM	UPI00000CAF12	nucleoid [GO:0009295]; single-stranded DNA binding [GO:0003697]; DNA recombination [GO:0006310]; DNA repair [GO:0006281]; DNA replication [GO:0006260]	GO:0003697; GO:0006260; GO:0006281; GO:0006310; GO:0009295
TRINITY_DN76_c0_g2_i4	475.57	1	2.81292e-24	-0.604422	Downregulated	SA-p vs SA	SSB_STAAN	Single-stranded DNA-binding protein (SSB)	ssb SA1792		DNA replication [GO:0006260]	nucleoid [GO:0009295]	single-stranded DNA binding [GO:0003697]		ssb			Staphylococcus aureus (strain N315)	SSB_STAAN	UPI00000C7F9B	nucleoid [GO:0009295]; single-stranded DNA binding [GO:0003697]; DNA replication [GO:0006260]	GO:0003697; GO:0006260; GO:0009295
TRINITY_DN10131_c0_g3_i1	2042	8	6.37307e-52	-0.525708	Downregulated	SA-p vs SA	SSAAL_STAA8	Probable autolysin SsaALP (EC 3.5.1.28)	SAOUHSC_00671		cell wall organization [GO:0071555]; defense response to bacterium [GO:0042742]; killing of cells of another organism [GO:0031640]		lytic endotransglycosylase activity [GO:0008932]; N-acetylmuramoyl-L-alanine amidase activity [GO:0008745]			3.5.1.28	FUNCTION: Has weak lytic activity toward S.aureus cells. {ECO:0000269|PubMed:25690309}.	Staphylococcus aureus (strain NCTC 8325 / PS 47)	SSAAL_STAA8	UPI000005226B	lytic endotransglycosylase activity [GO:0008932]; N-acetylmuramoyl-L-alanine amidase activity [GO:0008745]; cell wall organization [GO:0071555]; defense response to bacterium [GO:0042742]; killing of cells of another organism [GO:0031640]	GO:0008745; GO:0008932; GO:0031640; GO:0042742; GO:0071555
TRINITY_DN240_c0_g1_i1	177	1	1.69856e-10	-0.479398	Downregulated	SA-p vs SA	SRAP_STAAC	Serine-rich adhesin for platelets (Adhesin SraP) (Staphylococcus aureus surface protein A)	sraP sasA SACOL2676		cell adhesion [GO:0007155]	extracellular region [GO:0005576]; membrane [GO:0016020]	calcium ion binding [GO:0005509]		sraP		FUNCTION: Mediates binding to human platelets, possibly through a receptor-ligand interaction. Probably associated with virulence in endovascular infection (By similarity). {ECO:0000250, ECO:0000250|UniProtKB:Q2FUW1}.	Staphylococcus aureus (strain COL)	SRAP_STAAC	UPI000005224E	extracellular region [GO:0005576]; membrane [GO:0016020]; calcium ion binding [GO:0005509]; cell adhesion [GO:0007155]	GO:0005509; GO:0005576; GO:0007155; GO:0016020
TRINITY_DN1001_c0_g1_i1	6420.16	5	3.29962e-96	-0.730063	Downregulated	SA-p vs SA	SPX_STAAR	Global transcriptional regulator Spx	spx SAR0965		negative regulation of DNA-templated transcription [GO:0045892]	cytoplasm [GO:0005737]			spx		FUNCTION: Global transcriptional regulator that plays a key role in stress response and exerts either positive or negative regulation of genes. Acts by interacting with the C-terminal domain of the alpha subunit of the RNA polymerase (RNAP). This interaction can enhance binding of RNAP to the promoter region of target genes and stimulate their transcription, or block interaction of RNAP with acti…	Staphylococcus aureus (strain MRSA252)	SPX_STAAR	UPI00000D77A6	cytoplasm [GO:0005737]; negative regulation of DNA-templated transcription [GO:0045892]	GO:0005737; GO:0045892
TRINITY_DN22_c0_g1_i3	10	9264.26	1.64659e-216	1.03949	Upregulated	SA-p vs SA	SPUE_PSEAE	Spermidine-binding periplasmic protein SpuE	spuE PA0301		polyamine transport [GO:0015846]	extracellular space [GO:0005615]; periplasmic space [GO:0042597]	spermidine binding [GO:0019809]		spuE		FUNCTION: Spermidine-binding protein probably required for its uptake into cells. Binds spermidine with high affinity (KD=14.3 nM). Does not bind putrescine, cadaverine or spermine. Spermidine binding induces large inter-domain conformational changes. Implicated in induction of type 3 secretion systems (T3SS), which play a role in virulence. {ECO:0000269|PubMed:22300763}.	Pseudomonas aeruginosa (strain ATCC 15692 / DSM 22644 / CIP 104116 / JCM 14847 / LMG 12228 / 1C / PRS 101 / PAO1)	SPUE_PSEAE	UPI00000C4FF0	extracellular space [GO:0005615]; periplasmic space [GO:0042597]; spermidine binding [GO:0019809]; polyamine transport [GO:0015846]	GO:0005615; GO:0015846; GO:0019809; GO:0042597
TRINITY_DN877_c0_g1_i11	672	1	2.18881e-31	-0.648157	Downregulated	SA-p vs SA	SPA_STAAN	Immunoglobulin G-binding protein A (IgG-binding protein A) (Staphylococcal protein A) (SpA)	spa SA0107			extracellular region [GO:0005576]	IgG binding [GO:0019864]		spa		FUNCTION: Plays a role in the inhibition of the host innate and adaptive immune responses. Possesses five immunoglobulin-binding domains that capture both the fragment crystallizable region (Fc region) and the Fab region (part of Ig that identifies antigen) of immunoglobulins (By similarity). In turn, Staphylococcus aureus is protected from phagocytic killing via inhibition of Ig Fc region. In ad…	Staphylococcus aureus (strain N315)	SPA_STAAN	UPI00000CABB1	extracellular region [GO:0005576]; IgG binding [GO:0019864]	GO:0005576; GO:0019864
TRINITY_DN477_c0_g1_i5	12818	12.52	2.3769e-115	-0.701414	Downregulated	SA-p vs SA	SP5G_STAAM	Putative septation protein SpoVG	spoVG SAV0498		division septum assembly [GO:0000917]; sporulation resulting in formation of a cellular spore [GO:0030435]				spoVG		FUNCTION: Could be involved in septation. {ECO:0000255|HAMAP-Rule:MF_00819}.	Staphylococcus aureus (strain Mu50 / ATCC 700699)	SP5G_STAAM	UPI0000054645	division septum assembly [GO:0000917]; sporulation resulting in formation of a cellular spore [GO:0030435]	GO:0000917; GO:0030435
TRINITY_DN2546_c0_g1_i12	12211	12.55	2.37017e-113	-0.694975	Downregulated	SA-p vs SA	SODM2_STAAR	Superoxide dismutase [Mn/Fe] 2 (EC 1.15.1.1)	sodM SAR0135			cytoplasm [GO:0005737]	metal ion binding [GO:0046872]; superoxide dismutase activity [GO:0004784]		sodM	1.15.1.1	FUNCTION: Destroys superoxide anion radicals which are normally produced within the cells and which are toxic to biological systems. Catalyzes the dismutation of superoxide anion radicals into O2 and H2O2 by successive reduction and oxidation of the transition metal ion at the active site. {ECO:0000250|UniProtKB:P80293}.	Staphylococcus aureus (strain MRSA252)	SODM2_STAAR	UPI0000054701	cytoplasm [GO:0005737]; metal ion binding [GO:0046872]; superoxide dismutase activity [GO:0004784]	GO:0004784; GO:0005737; GO:0046872
TRINITY_DN4605_c1_g2_i2	47.62	0.42	0.000206996	-0.423058	Downregulated	SA-p vs SA	SODM1_STAAR	Superoxide dismutase [Mn/Fe] 1 (EC 1.15.1.1)	sodA SAR1630			cytoplasm [GO:0005737]	metal ion binding [GO:0046872]; superoxide dismutase activity [GO:0004784]		sodA	1.15.1.1	FUNCTION: Destroys superoxide anion radicals which are normally produced within the cells and which are toxic to biological systems. Catalyzes the dismutation of superoxide anion radicals into O2 and H2O2 by successive reduction and oxidation of the transition metal ion at the active site. {ECO:0000250|UniProtKB:P80293}.	Staphylococcus aureus (strain MRSA252)	SODM1_STAAR	UPI00000542C7	cytoplasm [GO:0005737]; metal ion binding [GO:0046872]; superoxide dismutase activity [GO:0004784]	GO:0004784; GO:0005737; GO:0046872
TRINITY_DN50_c0_g1_i7	15530.6	18.34	9.55532e-119	-0.677406	Downregulated	SA-p vs SA	SNAA_BACSU	S-alkylcysteine N-acetyltransferase (EC 2.3.1.80)	snaA ytmI BSU29390	PATHWAY: Amino-acid metabolism. {ECO:0000305|PubMed:35584544}.			cysteine-S-conjugate N-acetyltransferase activity [GO:0047198]		snaA	2.3.1.80	FUNCTION: Involved in a cysteine salvage pathway from S-alkylcysteine. Catalyzes the first step in this pathway, i.e. the amine acetylation of an S-alkylcysteine with a preference for S-benzyl-L-cysteine over S-methyl-L-cysteine. This pathway is likely important in the catabolism of alkylated cysteine generated by proteolysis of alkylated glutathione formed in the detoxification of a wide range o…	Bacillus subtilis (strain 168)	SNAA_BACSU	UPI00000608D4	cysteine-S-conjugate N-acetyltransferase activity [GO:0047198]	GO:0047198
TRINITY_DN9313_c0_g2_i1	872	3	4.6087e-34	-0.542144	Downregulated	SA-p vs SA	SLE1_STAAN	N-acetylmuramoyl-L-alanine amidase sle1 (EC 3.5.1.28)	sle1 aaa SA0423		cell wall organization [GO:0071555]; defense response to bacterium [GO:0042742]; division septum assembly [GO:0000917]; killing of cells of another organism [GO:0031640]	cell surface [GO:0009986]; extracellular region [GO:0005576]	lytic endotransglycosylase activity [GO:0008932]; N-acetylmuramoyl-L-alanine amidase activity [GO:0008745]		sle1	3.5.1.28	FUNCTION: Peptidoglycan hydrolase involved in the splitting of the septum during cell division. {ECO:0000250}.	Staphylococcus aureus (strain N315)	SLE1_STAAN	UPI0000052267	cell surface [GO:0009986]; extracellular region [GO:0005576]; lytic endotransglycosylase activity [GO:0008932]; N-acetylmuramoyl-L-alanine amidase activity [GO:0008745]; cell wall organization [GO:0071555]; defense response to bacterium [GO:0042742]; division septum assembly [GO:0000917]; killing of cells of another organism [GO:0031640]	GO:0000917; GO:0005576; GO:0008745; GO:0008932; GO:0009986; GO:0031640; GO:0042742; GO:0071555
TRINITY_DN9761_c0_g2_i3	730	3	7.0095e-30	-0.51966	Downregulated	SA-p vs SA	SIGS_STAAM	RNA polymerase sigma factor SigS	sigS SAV1777		DNA-templated transcription initiation [GO:0006352]		DNA binding [GO:0003677]; sigma factor activity [GO:0016987]		sigS		FUNCTION: Sigma factors are initiation factors that promote the attachment of RNA polymerase to specific initiation sites and are then released. Sigma-S contributes to the protection against external stress, thus playing a role in cellular fitness and survival (By similarity). {ECO:0000250}.	Staphylococcus aureus (strain Mu50 / ATCC 700699)	SIGS_STAAM	UPI00000CAB3B	DNA binding [GO:0003677]; sigma factor activity [GO:0016987]; DNA-templated transcription initiation [GO:0006352]	GO:0003677; GO:0006352; GO:0016987
[truncated: 564 more rows]

## Sheet: count-of-GO-terms
Description	Count	Category
[truncated: 1,320 more rows]

## Sheet: count-of-pathways
Pathway	Count
[truncated: 40 more rows]
