# Supplementary material for: Transcriptional plasticity enables Staphylococcus aureus adaptation to polymicrobial interactions
Source: Research Square preprint supplement (doi:10.21203/rs.3.rs-6909814/v1), 2025-07-17
Supplement: Supplementary file 2 [file 108a9936d24935fc36492dd7.xlsx]

## Sheet: all-DEGs
gene_id	SA	SA-E	Pvalue	logFC	category	condition
TRINITY_DN0_c0_g1_i10	84657.4	8205	0.0779728	-0.282564	Nonsignificant	SA-E vs SA
TRINITY_DN0_c0_g1_i14	175.69	1.03	3.9303e-07	-2.49739	Downregulated	SA-E vs SA
TRINITY_DN0_c0_g1_i15	9324.92	321.69	8.43402e-17	-1.09813	Downregulated	SA-E vs SA
TRINITY_DN0_c0_g1_i19	5153.8	160.06	1.54655e-17	-1.18109	Downregulated	SA-E vs SA
TRINITY_DN0_c0_g1_i33	23806.4	708.22	1.98829e-21	-1.21505	Downregulated	SA-E vs SA
TRINITY_DN1_c0_g1_i2	19.28	3.38	1	0.185364	Nonsignificant	SA-E vs SA
TRINITY_DN1_c0_g1_i3	52.35	7.1	1	-0.017277	Nonsignificant	SA-E vs SA
TRINITY_DN1_c0_g1_i7	1925.52	313.02	0.0871109	0.125762	Nonsignificant	SA-E vs SA
TRINITY_DN1_c13_g1_i1	27	1.07501e+07	0	11.7406	Upregulated	SA-E vs SA
TRINITY_DN1000_c0_g1_i1	3161	554	0.0225206	0.185138	Upregulated	SA-E vs SA
TRINITY_DN1000_c0_g3_i1	139	20	0.631477	0.0293956	Nonsignificant	SA-E vs SA
TRINITY_DN1000_c0_g4_i1	94	17	0.282632	0.209927	Nonsignificant	SA-E vs SA
TRINITY_DN1000_c0_g5_i1	1292	179	0.52831	-0.00046333	Nonsignificant	SA-E vs SA
TRINITY_DN1000_c1_g1_i1	393.45	64	0.201176	0.126246	Nonsignificant	SA-E vs SA
TRINITY_DN10008_c0_g1_i1	117	16	0.856069	-0.0107462	Nonsignificant	SA-E vs SA
TRINITY_DN1001_c0_g1_i1	6420.16	1399	0.000122012	0.35709	Upregulated	SA-E vs SA
TRINITY_DN1001_c0_g2_i1	84	7	0.464237	-0.401811	Nonsignificant	SA-E vs SA
TRINITY_DN1003_c0_g1_i1	19580	2245	0.564896	-0.149873	Nonsignificant	SA-E vs SA
TRINITY_DN10039_c1_g1_i1	138	29	0.0701121	0.328452	Nonsignificant	SA-E vs SA
TRINITY_DN1004_c0_g3_i1	21	35	2.06335e-14	1.96337	Upregulated	SA-E vs SA
TRINITY_DN1004_c1_g1_i1	14	8	0.0161862	1.11824	Upregulated	SA-E vs SA
TRINITY_DN1005_c0_g1_i1	21	13	0.000488104	1.18143	Upregulated	SA-E vs SA
TRINITY_DN1008_c0_g1_i1	346.16	19.35	0.00257805	-0.717067	Downregulated	SA-E vs SA
TRINITY_DN1008_c0_g1_i4	6080.84	731.65	0.819895	-0.111813	Nonsignificant	SA-E vs SA
TRINITY_DN1008_c0_g2_i1	130.63	29	0.0386722	0.371785	Upregulated	SA-E vs SA
TRINITY_DN1008_c2_g1_i1	1014	50	2.65969e-06	-0.816094	Downregulated	SA-E vs SA
TRINITY_DN1010_c0_g1_i2	315.56	16	0.0015756	-0.794086	Downregulated	SA-E vs SA
TRINITY_DN1010_c0_g1_i5	106.44	8	0.281076	-0.483316	Nonsignificant	SA-E vs SA
TRINITY_DN1011_c0_g1_i1	346	77	0.00399889	0.373711	Upregulated	SA-E vs SA
TRINITY_DN1012_c0_g1_i2	109.06	7.51	0.203903	-0.552416	Nonsignificant	SA-E vs SA
TRINITY_DN1012_c0_g1_i4	366.22	24.37	0.0105726	-0.579433	Downregulated	SA-E vs SA
TRINITY_DN1012_c0_g1_i7	9327.74	228.11	1.57059e-24	-1.36977	Downregulated	SA-E vs SA
TRINITY_DN1013_c0_g1_i1	460	30	0.0063016	-0.59534	Downregulated	SA-E vs SA
TRINITY_DN10131_c0_g2_i1	1729	331	0.00576685	0.254851	Upregulated	SA-E vs SA
TRINITY_DN10131_c0_g3_i1	2042	173	0.0182112	-0.388774	Downregulated	SA-E vs SA
TRINITY_DN1015_c0_g1_i1	37	5	1	-0.0201373	Nonsignificant	SA-E vs SA
TRINITY_DN1015_c0_g2_i1	2168	197	0.0502786	-0.333478	Nonsignificant	SA-E vs SA
TRINITY_DN1016_c0_g1_i1	422	42	0.326593	-0.261616	Nonsignificant	SA-E vs SA
TRINITY_DN10174_c0_g1_i2	294.12	22	0.0617099	-0.48711	Nonsignificant	SA-E vs SA
TRINITY_DN10174_c0_g1_i3	76.53	8	0.803068	-0.222855	Nonsignificant	SA-E vs SA
TRINITY_DN10197_c0_g1_i1	6596.8	387	6.75365e-07	-0.678939	Downregulated	SA-E vs SA
TRINITY_DN10197_c0_g2_i1	40	3	0.564053	-0.484995	Nonsignificant	SA-E vs SA
TRINITY_DN10197_c1_g1_i1	109	22	0.12208	0.296597	Nonsignificant	SA-E vs SA
TRINITY_DN102_c0_g1_i2	59	10	0.506904	0.15871	Nonsignificant	SA-E vs SA
TRINITY_DN102_c0_g4_i1	1	13	2.47519e-06	3.58514	Upregulated	SA-E vs SA
TRINITY_DN102_c1_g3_i1	3	14	7.44748e-07	2.77627	Upregulated	SA-E vs SA
TRINITY_DN10211_c0_g2_i1	259	16	0.0175998	-0.63814	Downregulated	SA-E vs SA
TRINITY_DN10211_c0_g3_i1	2027.67	280.96	0.497197	-0.000360253	Nonsignificant	SA-E vs SA
TRINITY_DN10211_c0_g3_i2	1509.33	150.04	0.178724	-0.26255	Nonsignificant	SA-E vs SA
TRINITY_DN10211_c0_g4_i1	25	7	0.175453	0.555037	Nonsignificant	SA-E vs SA
TRINITY_DN1029_c0_g1_i1	282	28	0.39672	-0.263485	Nonsignificant	SA-E vs SA
TRINITY_DN1031_c0_g1_i1	243	49	0.0336881	0.295858	Upregulated	SA-E vs SA
TRINITY_DN10312_c0_g1_i1	213	20	0.35694	-0.307585	Nonsignificant	SA-E vs SA
TRINITY_DN1032_c0_g1_i2	526.11	28	0.000300221	-0.75583	Downregulated	SA-E vs SA
TRINITY_DN10323_c0_g1_i1	74.05	42.91	1.01947e-08	1.12928	Upregulated	SA-E vs SA
TRINITY_DN10323_c0_g1_i3	810.75	455.09	3.87543e-21	1.10415	Upregulated	SA-E vs SA
TRINITY_DN10325_c0_g2_i1	168	34	0.0643412	0.29873	Nonsignificant	SA-E vs SA
TRINITY_DN10325_c0_g4_i1	363	7	2.71108e-08	-1.55734	Downregulated	SA-E vs SA
TRINITY_DN10341_c0_g1_i1	937	119	0.911267	-0.0691505	Nonsignificant	SA-E vs SA
TRINITY_DN10341_c0_g2_i1	178	12	0.0697735	-0.569165	Nonsignificant	SA-E vs SA
TRINITY_DN10364_c0_g1_i1	741	81	0.501386	-0.187572	Nonsignificant	SA-E vs SA
TRINITY_DN10364_c0_g2_i1	196	26	0.847566	-0.0347736	Nonsignificant	SA-E vs SA
TRINITY_DN10364_c0_g3_i2	222.19	39	0.157416	0.186328	Nonsignificant	SA-E vs SA
TRINITY_DN10364_c0_g4_i1	261	27	0.50445	-0.231099	Nonsignificant	SA-E vs SA
TRINITY_DN10377_c0_g1_i1	84	26	0.00291723	0.634183	Upregulated	SA-E vs SA
TRINITY_DN10392_c0_g1_i1	115	18	0.534537	0.0958582	Nonsignificant	SA-E vs SA
TRINITY_DN104_c0_g1_i1	1738	512	1.83234e-08	0.595145	Upregulated	SA-E vs SA
TRINITY_DN1040_c0_g1_i1	566.78	69	0.9305	-0.102551	Nonsignificant	SA-E vs SA
TRINITY_DN10432_c0_g2_i1	306	28	0.221009	-0.327971	Nonsignificant	SA-E vs SA
TRINITY_DN1044_c0_g1_i1	1747.59	203.7	0.694557	-0.136879	Nonsignificant	SA-E vs SA
TRINITY_DN1044_c0_g1_i5	159511	37535.3	8.47387e-06	0.417766	Upregulated	SA-E vs SA
TRINITY_DN10466_c0_g1_i1	25	17	4.17025e-05	1.25558	Upregulated	SA-E vs SA
TRINITY_DN10466_c0_g2_i1	78	26	0.00108855	0.692692	Upregulated	SA-E vs SA
TRINITY_DN1047_c0_g1_i1	121	17	0.724742	0.0105771	Nonsignificant	SA-E vs SA
TRINITY_DN1047_c0_g2_i1	1066.28	95.7	0.0710982	-0.343234	Nonsignificant	SA-E vs SA
TRINITY_DN1047_c0_g2_i2	3439.72	229.3	7.15053e-05	-0.578037	Downregulated	SA-E vs SA
TRINITY_DN10484_c0_g1_i1	26	2	0.81105	-0.465006	Nonsignificant	SA-E vs SA
TRINITY_DN10484_c0_g2_i1	473	49	0.394721	-0.229987	Nonsignificant	SA-E vs SA
TRINITY_DN10486_c0_g1_i1	58	6	0.770192	-0.231099	Nonsignificant	SA-E vs SA
TRINITY_DN10531_c0_g1_i1	13.15	4.52	0.13207	0.716933	Nonsignificant	SA-E vs SA
TRINITY_DN10531_c0_g1_i2	1218.03	285.44	6.94139e-05	0.414509	Upregulated	SA-E vs SA
TRINITY_DN10531_c0_g1_i3	6125.82	1252.04	0.000679555	0.306519	Upregulated	SA-E vs SA
TRINITY_DN10531_c0_g3_i1	22750	4155	0.00744989	0.217687	Upregulated	SA-E vs SA
TRINITY_DN106_c0_g2_i1	29	1.37	0.227948	-0.849924	Nonsignificant	SA-E vs SA
TRINITY_DN1061_c0_g1_i3	3092.85	223.01	0.000540694	-0.516074	Downregulated	SA-E vs SA
TRINITY_DN1061_c0_g1_i4	3431.96	833.99	6.39364e-06	0.443163	Upregulated	SA-E vs SA
TRINITY_DN1061_c0_g2_i1	1287	111	0.0357408	-0.374677	Downregulated	SA-E vs SA
TRINITY_DN1061_c0_g3_i1	264	18	0.0347118	-0.560244	Downregulated	SA-E vs SA
TRINITY_DN10625_c0_g1_i1	13	6	0.0884894	0.949619	Nonsignificant	SA-E vs SA
TRINITY_DN10628_c0_g1_i1	265.83	81.55	6.54022e-06	0.62714	Upregulated	SA-E vs SA
TRINITY_DN10628_c0_g1_i3	561.17	138.45	0.000106783	0.455125	Upregulated	SA-E vs SA
TRINITY_DN10628_c0_g2_i1	94	5	0.0857668	-0.756265	Nonsignificant	SA-E vs SA
TRINITY_DN10628_c0_g3_i1	676	95	0.5204	0.0107831	Nonsignificant	SA-E vs SA
TRINITY_DN10628_c1_g1_i1	3098	490	0.112457	0.104112	Nonsignificant	SA-E vs SA
TRINITY_DN10628_c1_g2_i1	395	53	0.762466	-0.0257539	Nonsignificant	SA-E vs SA
TRINITY_DN10634_c0_g1_i1	59	1	0.0246357	-1.65922	Downregulated	SA-E vs SA
TRINITY_DN10647_c0_g1_i1	587	32	0.000255123	-0.736868	Downregulated	SA-E vs SA
TRINITY_DN1067_c0_g1_i3	116.88	145	4.19171e-30	1.73028	Upregulated	SA-E vs SA
TRINITY_DN1069_c0_g1_i1	298.15	44.28	0.464632	0.054406	Nonsignificant	SA-E vs SA
TRINITY_DN1069_c0_g1_i2	492.85	66.72	0.660313	-0.0187322	Nonsignificant	SA-E vs SA
TRINITY_DN1069_c0_g2_i1	583	145	7.64505e-05	0.461489	Upregulated	SA-E vs SA
TRINITY_DN10713_c0_g1_i1	74	11	0.723655	0.0551117	Nonsignificant	SA-E vs SA
TRINITY_DN10770_c0_g1_i1	77	6	0.364482	-0.454819	Nonsignificant	SA-E vs SA
TRINITY_DN10770_c0_g2_i1	259	41	0.319127	0.104783	Nonsignificant	SA-E vs SA
TRINITY_DN1079_c0_g1_i4	182.49	43	0.00857343	0.418822	Upregulated	SA-E vs SA
TRINITY_DN1079_c0_g1_i5	509.62	57	0.602145	-0.169462	Nonsignificant	SA-E vs SA
TRINITY_DN1079_c0_g2_i1	159	18	0.816357	-0.159923	Nonsignificant	SA-E vs SA
TRINITY_DN108_c0_g1_i1	170	4	0.000192791	-1.40023	Downregulated	SA-E vs SA
TRINITY_DN10814_c0_g1_i1	651	42	0.00179332	-0.603875	Downregulated	SA-E vs SA
TRINITY_DN10814_c0_g2_i1	107	15	0.773672	0.008839	Nonsignificant	SA-E vs SA
TRINITY_DN10833_c0_g1_i1	129	3	0.000945626	-1.40947	Downregulated	SA-E vs SA
TRINITY_DN10867_c0_g1_i1	16	6	0.11103	0.785684	Nonsignificant	SA-E vs SA
TRINITY_DN1088_c1_g1_i1	3117	445	0.367414	0.0232292	Nonsignificant	SA-E vs SA
TRINITY_DN1088_c1_g2_i1	538	32	0.0011676	-0.668049	Downregulated	SA-E vs SA
TRINITY_DN1088_c1_g3_i1	263	13	0.00248181	-0.814175	Downregulated	SA-E vs SA
TRINITY_DN1088_c2_g1_i1	178	2	2.88668e-06	-1.98379	Downregulated	SA-E vs SA
TRINITY_DN10882_c0_g1_i1	132	8	0.0800549	-0.653236	Nonsignificant	SA-E vs SA
TRINITY_DN10882_c0_g2_i1	87	6	0.221422	-0.551221	Nonsignificant	SA-E vs SA
TRINITY_DN1090_c0_g1_i1	15732.9	2361.94	0.192997	0.0629271	Nonsignificant	SA-E vs SA
TRINITY_DN1090_c0_g1_i3	11003.1	655.06	6.28154e-07	-0.667325	Downregulated	SA-E vs SA
TRINITY_DN1091_c0_g1_i1	25	3	1	-0.113919	Nonsignificant	SA-E vs SA
TRINITY_DN1091_c0_g2_i1	51	9	0.471159	0.190568	Nonsignificant	SA-E vs SA
TRINITY_DN10914_c0_g4_i1	17	2	1	-0.129553	Nonsignificant	SA-E vs SA
TRINITY_DN10917_c0_g1_i1	16	15	1.05674e-05	1.50911	Upregulated	SA-E vs SA
TRINITY_DN1093_c0_g1_i1	170	8	0.0127332	-0.852981	Downregulated	SA-E vs SA
TRINITY_DN1093_c0_g2_i2	84	15	0.345894	0.199912	Nonsignificant	SA-E vs SA
TRINITY_DN1093_c0_g3_i1	3371.71	299.7	0.0291269	-0.350877	Downregulated	SA-E vs SA
TRINITY_DN1093_c0_g3_i2	20.29	82.3	3.08072e-33	2.66558	Upregulated	SA-E vs SA
TRINITY_DN1093_c1_g1_i2	64	21	0.00405285	0.680259	Upregulated	SA-E vs SA
TRINITY_DN1093_c1_g1_i6	182	28	0.434629	0.0822455	Nonsignificant	SA-E vs SA
TRINITY_DN1093_c2_g1_i1	542	68	0.976207	-0.0787814	Nonsignificant	SA-E vs SA
TRINITY_DN10932_c0_g1_i1	695	68	0.226122	-0.275092	Nonsignificant	SA-E vs SA
TRINITY_DN10932_c2_g1_i2	10875.7	1129	0.210219	-0.228349	Nonsignificant	SA-E vs SA
TRINITY_DN10932_c2_g3_i1	495	19	4.59971e-06	-1.01385	Downregulated	SA-E vs SA
TRINITY_DN10932_c2_g4_i1	193	42	0.0210364	0.356036	Upregulated	SA-E vs SA
TRINITY_DN10932_c2_g5_i1	55	2	0.12358	-1.05654	Nonsignificant	SA-E vs SA
TRINITY_DN1096_c0_g1_i1	44	13	0.0387935	0.597455	Upregulated	SA-E vs SA
TRINITY_DN11_c0_g1_i10	1685.61	11.33	4.16412e-32	-2.38944	Downregulated	SA-E vs SA
TRINITY_DN11_c0_g1_i14	6980.17	1.03	1.45866e-90	-5.40448	Downregulated	SA-E vs SA
TRINITY_DN11_c0_g1_i15	178.92	63.97	1.65638e-06	0.748028	Upregulated	SA-E vs SA
TRINITY_DN11_c0_g1_i18	104.1	7	0.186636	-0.57119	Nonsignificant	SA-E vs SA
TRINITY_DN11_c0_g1_i19	74.86	1	0.00546398	-1.84719	Downregulated	SA-E vs SA
TRINITY_DN11_c0_g1_i22	93.49	8.67	0.654527	-0.317395	Nonsignificant	SA-E vs SA
TRINITY_DN110_c0_g1_i2	793.93	740.86	3.3646e-36	1.50544	Upregulated	SA-E vs SA
TRINITY_DN110_c0_g1_i3	11250.1	1091.77	0.0865269	-0.281544	Nonsignificant	SA-E vs SA
TRINITY_DN110_c0_g1_i9	44.69	1.37	0.0452806	-1.19135	Downregulated	SA-E vs SA
TRINITY_DN11045_c0_g1_i1	270	44	0.252263	0.127698	Nonsignificant	SA-E vs SA
TRINITY_DN11047_c0_g1_i1	63	12	0.317351	0.250866	Nonsignificant	SA-E vs SA
TRINITY_DN11047_c0_g2_i1	198	204	1.93884e-30	1.58364	Upregulated	SA-E vs SA
TRINITY_DN11049_c0_g1_i1	130	15	0.930376	-0.144884	Nonsignificant	SA-E vs SA
TRINITY_DN1105_c0_g1_i1	818	40	7.27962e-06	-0.822684	Downregulated	SA-E vs SA
TRINITY_DN1106_c0_g1_i1	176	31	0.177204	0.189071	Nonsignificant	SA-E vs SA
TRINITY_DN1106_c1_g1_i1	25	4	0.832022	0.113211	Nonsignificant	SA-E vs SA
TRINITY_DN1107_c0_g1_i1	104.83	42.17	7.13852e-06	0.841107	Upregulated	SA-E vs SA
TRINITY_DN1107_c0_g1_i2	199.65	19.83	0.497426	-0.263222	Nonsignificant	SA-E vs SA
TRINITY_DN111_c0_g1_i2	71	89	5.31096e-24	1.73846	Upregulated	SA-E vs SA
TRINITY_DN1111_c0_g1_i1	397	46	0.753179	-0.141577	Nonsignificant	SA-E vs SA
TRINITY_DN1111_c0_g3_i1	397	21	0.00104485	-0.760653	Downregulated	SA-E vs SA
TRINITY_DN11123_c0_g1_i1	368	28	0.046012	-0.473635	Downregulated	SA-E vs SA
TRINITY_DN1115_c0_g1_i1	570	54	0.188454	-0.300552	Nonsignificant	SA-E vs SA
TRINITY_DN1115_c0_g1_i2	1062	109	0.272069	-0.237319	Nonsignificant	SA-E vs SA
TRINITY_DN11152_c0_g1_i1	901.38	117.58	0.775602	-0.0480295	Nonsignificant	SA-E vs SA
TRINITY_DN11152_c0_g1_i2	682.86	55.95	0.0397466	-0.415174	Downregulated	SA-E vs SA
TRINITY_DN11152_c0_g1_i3	148.15	11	0.163636	-0.49294	Nonsignificant	SA-E vs SA
TRINITY_DN11152_c0_g1_i8	44.35	13.09	0.0387935	0.596646	Upregulated	SA-E vs SA
TRINITY_DN11152_c0_g1_i9	22.06	41.38	1.07459e-16	2.0567	Upregulated	SA-E vs SA
TRINITY_DN11152_c0_g2_i1	66	5	0.393728	-0.47706	Nonsignificant	SA-E vs SA
TRINITY_DN1117_c0_g1_i1	15.19	1.38	1	-0.333634	Nonsignificant	SA-E vs SA
TRINITY_DN1117_c0_g1_i2	14	2	1	0.0237363	Nonsignificant	SA-E vs SA
TRINITY_DN1117_c0_g1_i3	80.81	10.62	0.819421	-0.0421504	Nonsignificant	SA-E vs SA
TRINITY_DN1117_c1_g1_i1	45	1	0.0452806	-1.44536	Downregulated	SA-E vs SA
TRINITY_DN1118_c0_g1_i1	338	29	0.134453	-0.378792	Nonsignificant	SA-E vs SA
TRINITY_DN1118_c0_g2_i1	23	5	0.523805	0.355218	Nonsignificant	SA-E vs SA
TRINITY_DN112_c0_g1_i1	1893.34	84.66	8.80631e-09	-0.893324	Downregulated	SA-E vs SA
TRINITY_DN112_c0_g1_i12	175.66	32.54	0.114853	0.228876	Nonsignificant	SA-E vs SA
TRINITY_DN112_c0_g1_i14	3511.02	754.87	0.000229035	0.346486	Upregulated	SA-E vs SA
TRINITY_DN112_c0_g1_i15	229.81	39.63	0.167707	0.172358	Nonsignificant	SA-E vs SA
TRINITY_DN112_c0_g1_i2	1765.44	235.84	0.660795	-0.0292339	Nonsignificant	SA-E vs SA
TRINITY_DN112_c0_g1_i5	2289.93	239.07	0.266338	-0.223865	Nonsignificant	SA-E vs SA
TRINITY_DN112_c0_g1_i7	156.29	1.71	2.43484e-05	-2.00478	Downregulated	SA-E vs SA
TRINITY_DN112_c0_g1_i9	24.68	35.67	3.61333e-13	1.85086	Upregulated	SA-E vs SA
TRINITY_DN112_c1_g1_i1	88	13	0.749303	0.0502028	Nonsignificant	SA-E vs SA
TRINITY_DN1122_c0_g1_i4	168.96	16	0.399794	-0.300885	Nonsignificant	SA-E vs SA
TRINITY_DN11270_c0_g1_i1	211	32	0.44395	0.0709396	Nonsignificant	SA-E vs SA
TRINITY_DN113_c0_g2_i2	88	38	4.81909e-06	0.897068	Upregulated	SA-E vs SA
TRINITY_DN113_c0_g3_i2	271.76	8	2.22822e-05	-1.22336	Downregulated	SA-E vs SA
TRINITY_DN113_c0_g3_i5	5602.99	1157.26	0.000538089	0.314803	Upregulated	SA-E vs SA
TRINITY_DN113_c0_g3_i6	181.25	104.74	2.34103e-14	1.1271	Upregulated	SA-E vs SA
TRINITY_DN113_c0_g3_i7	551	57	0.38122	-0.231099	Nonsignificant	SA-E vs SA
TRINITY_DN11335_c0_g1_i1	222	90	4.94142e-09	0.847236	Upregulated	SA-E vs SA
TRINITY_DN1135_c0_g1_i1	25	22	2.42031e-07	1.45914	Upregulated	SA-E vs SA
TRINITY_DN1137_c0_g1_i1	961.4	91.53	0.147466	-0.296661	Nonsignificant	SA-E vs SA
TRINITY_DN1137_c0_g1_i2	1828.76	310.47	0.0474345	0.16001	Upregulated	SA-E vs SA
TRINITY_DN1137_c0_g2_i1	355.24	38	0.538769	-0.204669	Nonsignificant	SA-E vs SA
TRINITY_DN1139_c0_g1_i1	309	39	1	-0.0740612	Nonsignificant	SA-E vs SA
TRINITY_DN1139_c1_g1_i1	319	44	0.689951	-0.00396924	Nonsignificant	SA-E vs SA
TRINITY_DN11398_c0_g1_i2	4170.19	571.44	0.525894	-0.00914527	Nonsignificant	SA-E vs SA
TRINITY_DN11398_c0_g1_i5	332.81	117.56	2.11227e-08	0.738476	Upregulated	SA-E vs SA
TRINITY_DN11398_c0_g2_i1	206	24	0.847566	-0.137256	Nonsignificant	SA-E vs SA
TRINITY_DN11398_c0_g3_i1	104	3	0.00764597	-1.23939	Downregulated	SA-E vs SA
TRINITY_DN11398_c0_g4_i1	185	22	0.945065	-0.121064	Nonsignificant	SA-E vs SA
TRINITY_DN11398_c0_g5_i1	74	13	0.360272	0.187004	Nonsignificant	SA-E vs SA
TRINITY_DN114_c0_g1_i1	88.94	10.42	0.823019	-0.132845	Nonsignificant	SA-E vs SA
TRINITY_DN114_c0_g1_i10	340.04	72.13	0.00891795	0.335846	Upregulated	SA-E vs SA
TRINITY_DN114_c0_g1_i14	548.87	134.65	0.00011453	0.45065	Upregulated	SA-E vs SA
TRINITY_DN114_c0_g1_i15	122.08	4.98	0.0187995	-0.965795	Downregulated	SA-E vs SA
TRINITY_DN114_c0_g1_i16	44.54	10.64	0.153582	0.429661	Nonsignificant	SA-E vs SA
TRINITY_DN114_c0_g1_i5	7274.94	557.07	0.00107021	-0.468599	Downregulated	SA-E vs SA
TRINITY_DN114_c0_g1_i7	229.6	49.12	0.0197909	0.342573	Upregulated	SA-E vs SA
TRINITY_DN1142_c0_g1_i1	54	1	0.0276789	-1.58931	Downregulated	SA-E vs SA
TRINITY_DN1142_c1_g1_i1	74	16	0.130311	0.350939	Nonsignificant	SA-E vs SA
TRINITY_DN1142_c1_g2_i1	328	43	0.825761	-0.0440862	Nonsignificant	SA-E vs SA
TRINITY_DN1145_c0_g1_i2	374.43	95.09	0.000188122	0.477968	Upregulated	SA-E vs SA
TRINITY_DN1145_c0_g1_i3	275.57	27.91	0.451174	-0.247816	Nonsignificant	SA-E vs SA
TRINITY_DN1145_c0_g2_i1	2648	577	0.000193237	0.357064	Upregulated	SA-E vs SA
TRINITY_DN1145_c0_g2_i3	2701	268	0.145918	-0.264028	Nonsignificant	SA-E vs SA
TRINITY_DN1145_c1_g1_i1	221	17	0.109585	-0.465006	Nonsignificant	SA-E vs SA
TRINITY_DN1146_c0_g1_i4	588.41	67	0.665343	-0.155343	Nonsignificant	SA-E vs SA
TRINITY_DN1146_c0_g1_i5	50	1	0.0397031	-1.52854	Downregulated	SA-E vs SA
TRINITY_DN1146_c0_g2_i1	152	8	0.0230463	-0.76462	Downregulated	SA-E vs SA
TRINITY_DN1147_c0_g1_i1	1764	347	0.0032375	0.276299	Upregulated	SA-E vs SA
TRINITY_DN1147_c0_g1_i4	629	61	0.21799	-0.282081	Nonsignificant	SA-E vs SA
TRINITY_DN1148_c0_g1_i1	462	9.67	4.12385e-09	-1.49263	Downregulated	SA-E vs SA
TRINITY_DN11483_c0_g1_i1	101	1	0.000296643	-2.08365	Downregulated	SA-E vs SA
TRINITY_DN1153_c0_g1_i2	8	12.83	4.812e-06	1.93299	Upregulated	SA-E vs SA
TRINITY_DN1154_c0_g1_i1	173	14	0.211414	-0.424966	Nonsignificant	SA-E vs SA
TRINITY_DN11547_c0_g1_i1	116	8	0.180393	-0.551221	Nonsignificant	SA-E vs SA
TRINITY_DN11549_c0_g1_i1	476	11	6.38187e-09	-1.41446	Downregulated	SA-E vs SA
TRINITY_DN11549_c0_g2_i3	2749.5	248	0.0396078	-0.339312	Downregulated	SA-E vs SA
TRINITY_DN11549_c0_g3_i1	256	5	1.96508e-06	-1.54727	Downregulated	SA-E vs SA
TRINITY_DN11549_c0_g4_i1	209	38	0.130412	0.214138	Nonsignificant	SA-E vs SA
TRINITY_DN1155_c0_g1_i1	190	6	0.000535268	-1.16793	Downregulated	SA-E vs SA
TRINITY_DN1155_c1_g1_i1	151	9	0.0476948	-0.666417	Downregulated	SA-E vs SA
TRINITY_DN1155_c2_g1_i1	183	21	0.834447	-0.149211	Nonsignificant	SA-E vs SA
TRINITY_DN11552_c0_g1_i1	272	19	0.0450954	-0.541127	Downregulated	SA-E vs SA
TRINITY_DN11559_c0_g2_i1	194	12	0.0341522	-0.637123	Downregulated	SA-E vs SA
TRINITY_DN116_c0_g1_i13	4.15	23	1.42164e-10	2.91202	Upregulated	SA-E vs SA
TRINITY_DN11616_c0_g1_i1	16	1	0.759851	-0.628941	Nonsignificant	SA-E vs SA
TRINITY_DN11652_c0_g1_i1	174	15	0.250393	-0.375045	Nonsignificant	SA-E vs SA
TRINITY_DN11652_c1_g1_i1	1544.47	86.26	6.28799e-06	-0.717747	Downregulated	SA-E vs SA
TRINITY_DN11652_c1_g1_i2	324.74	21	0.0131415	-0.60203	Downregulated	SA-E vs SA
TRINITY_DN11652_c1_g1_i3	139.79	46.74	3.7489e-05	0.695117	Upregulated	SA-E vs SA
TRINITY_DN11655_c1_g2_i3	183.42	9	0.0116633	-0.819977	Downregulated	SA-E vs SA
TRINITY_DN11655_c1_g4_i1	11856	769	9.37971e-06	-0.599658	Downregulated	SA-E vs SA
TRINITY_DN11655_c2_g1_i1	430	62	0.491657	0.0310464	Nonsignificant	SA-E vs SA
TRINITY_DN11655_c3_g1_i1	67	8	1	-0.117857	Nonsignificant	SA-E vs SA
TRINITY_DN11656_c0_g1_i1	3314	645	0.00271604	0.267894	Upregulated	SA-E vs SA
TRINITY_DN11656_c0_g2_i1	335	30	0.178227	-0.344987	Nonsignificant	SA-E vs SA
TRINITY_DN11667_c0_g3_i2	28.95	1	0.227948	-1.09711	Nonsignificant	SA-E vs SA
TRINITY_DN11705_c0_g1_i1	198	24	1	-0.105984	Nonsignificant	SA-E vs SA
TRINITY_DN1171_c0_g1_i1	309.64	21.24	0.0228436	-0.555465	Downregulated	SA-E vs SA
TRINITY_DN1171_c0_g1_i5	37.53	5.76	0.729435	0.08035	Nonsignificant	SA-E vs SA
TRINITY_DN1171_c0_g3_i1	234	14	0.0184168	-0.663423	Downregulated	SA-E vs SA
TRINITY_DN1172_c0_g1_i1	36.15	1.8	0.407173	-0.808399	Nonsignificant	SA-E vs SA
TRINITY_DN1172_c0_g1_i2	4101.85	462.56	0.515509	-0.16299	Nonsignificant	SA-E vs SA
TRINITY_DN1172_c0_g1_i6	111	20.64	0.195011	0.231861	Nonsignificant	SA-E vs SA
TRINITY_DN1172_c0_g3_i1	108	11	0.613926	-0.243378	Nonsignificant	SA-E vs SA
TRINITY_DN11728_c0_g1_i1	98	4	0.0384848	-0.965342	Downregulated	SA-E vs SA
TRINITY_DN11740_c0_g1_i1	45	1	0.0452806	-1.44536	Downregulated	SA-E vs SA
TRINITY_DN1175_c0_g1_i1	51.32	0.71	0.0397031	-1.81952	Downregulated	SA-E vs SA
TRINITY_DN1175_c0_g1_i2	445	79	0.0713053	0.195285	Nonsignificant	SA-E vs SA
TRINITY_DN1175_c0_g1_i4	299.68	4.32	1.52561e-08	-1.78706	Downregulated	SA-E vs SA
TRINITY_DN1181_c1_g1_i1	255.18	40	0.338535	0.0970193	Nonsignificant	SA-E vs SA
TRINITY_DN119_c0_g1_i3	33	6	0.581089	0.214138	Nonsignificant	SA-E vs SA
TRINITY_DN119_c0_g1_i4	2	27	3.33429e-12	3.61493	Upregulated	SA-E vs SA
TRINITY_DN11902_c0_g2_i1	14	3	0.780907	0.343858	Nonsignificant	SA-E vs SA
TRINITY_DN11922_c0_g1_i1	24.26	0.45	0.0246349	-1.588	Downregulated	SA-E vs SA
TRINITY_DN11922_c0_g1_i2	536.74	39.55	0.0188282	-0.498955	Downregulated	SA-E vs SA
TRINITY_DN11951_c0_g1_i1	936	75	0.0183398	-0.432777	Downregulated	SA-E vs SA
TRINITY_DN11964_c0_g1_i1	39	13	0.0211185	0.692693	Upregulated	SA-E vs SA
TRINITY_DN1197_c0_g1_i1	1285	188	0.330043	0.0425566	Nonsignificant	SA-E vs SA
TRINITY_DN1198_c0_g1_i1	745	77	0.329807	-0.231806	Nonsignificant	SA-E vs SA
TRINITY_DN1198_c1_g1_i1	7	16	2.21221e-08	2.21274	Upregulated	SA-E vs SA
TRINITY_DN12_c0_g2_i1	14	7	0.0384743	1.01281	Upregulated	SA-E vs SA
TRINITY_DN12_c0_g5_i1	18	10	0.00662995	1.096	Upregulated	SA-E vs SA
TRINITY_DN12_c4_g1_i1	51	4	0.504731	-0.449675	Nonsignificant	SA-E vs SA
TRINITY_DN120_c0_g1_i1	120	3	0.00225486	-1.35237	Downregulated	SA-E vs SA
TRINITY_DN120_c0_g2_i1	10853	1173	0.329171	-0.196513	Nonsignificant	SA-E vs SA
TRINITY_DN1201_c0_g1_i1	28	1	0.319467	-1.07077	Nonsignificant	SA-E vs SA
TRINITY_DN12015_c0_g1_i1	42281.3	4096.66	0.0787331	-0.282804	Nonsignificant	SA-E vs SA
TRINITY_DN12015_c0_g1_i3	61.25	6.34	0.665796	-0.230627	Nonsignificant	SA-E vs SA
TRINITY_DN121_c1_g1_i3	844.63	498	1.27137e-22	1.14297	Upregulated	SA-E vs SA
TRINITY_DN1211_c0_g1_i1	714	74	0.337407	-0.229626	Nonsignificant	SA-E vs SA
TRINITY_DN1215_c0_g1_i1	170	10	0.0373851	-0.676805	Downregulated	SA-E vs SA
TRINITY_DN12159_c1_g1_i1	64	3	0.129425	-0.856071	Nonsignificant	SA-E vs SA
TRINITY_DN12159_c1_g2_i1	59	41	9.19915e-10	1.27271	Upregulated	SA-E vs SA
TRINITY_DN1217_c0_g1_i1	261	38	0.509665	0.0387178	Nonsignificant	SA-E vs SA
TRINITY_DN1217_c1_g1_i1	18	13	0.000165623	1.30314	Upregulated	SA-E vs SA
TRINITY_DN12192_c0_g1_i1	13	2	1	0.0822458	Nonsignificant	SA-E vs SA
TRINITY_DN1222_c0_g1_i1	172	26	0.497426	0.0683534	Nonsignificant	SA-E vs SA
TRINITY_DN12256_c0_g1_i1	44	17	0.00297647	0.809254	Upregulated	SA-E vs SA
TRINITY_DN12256_c1_g1_i1	18	17	6.16451e-06	1.51494	Upregulated	SA-E vs SA
TRINITY_DN12270_c0_g1_i1	202	6	0.0002523	-1.21628	Downregulated	SA-E vs SA
TRINITY_DN12284_c0_g1_i1	162	24	0.566367	0.0524489	Nonsignificant	SA-E vs SA
TRINITY_DN12288_c0_g1_i1	105	63	1.68804e-11	1.15676	Upregulated	SA-E vs SA
TRINITY_DN1230_c0_g1_i1	332	26	0.065378	-0.450865	Nonsignificant	SA-E vs SA
TRINITY_DN1230_c0_g2_i1	125	6	0.0294287	-0.837347	Downregulated	SA-E vs SA
TRINITY_DN12333_c0_g1_i2	278	28.47	0.42134	-0.239063	Nonsignificant	SA-E vs SA
TRINITY_DN12342_c0_g1_i1	136	7	0.0318622	-0.782231	Downregulated	SA-E vs SA
TRINITY_DN12380_c0_g1_i1	12	7	0.016576	1.13452	Upregulated	SA-E vs SA
TRINITY_DN12387_c0_g1_i2	75	21	0.0151306	0.555037	Upregulated	SA-E vs SA
TRINITY_DN124_c0_g1_i28	13.35	7.38	0.016576	1.09209	Upregulated	SA-E vs SA
TRINITY_DN124_c0_g1_i5	61.98	6.96	1	-0.166318	Nonsignificant	SA-E vs SA
TRINITY_DN1242_c0_g1_i1	73	3	0.0586261	-0.959953	Nonsignificant	SA-E vs SA
TRINITY_DN1243_c0_g1_i2	548.87	99.22	0.0440406	0.209579	Upregulated	SA-E vs SA
TRINITY_DN1243_c0_g1_i3	702.13	41.78	0.000505419	-0.667716	Downregulated	SA-E vs SA
TRINITY_DN1243_c0_g2_i1	375	62	0.17387	0.139099	Nonsignificant	SA-E vs SA
TRINITY_DN1243_c0_g3_i1	152	4	0.000588384	-1.31187	Downregulated	SA-E vs SA
TRINITY_DN1244_c0_g2_i1	32	5	0.847719	0.0944865	Nonsignificant	SA-E vs SA
TRINITY_DN12454_c0_g1_i1	222	14	0.0270464	-0.62186	Downregulated	SA-E vs SA
TRINITY_DN12454_c0_g2_i1	69	16	0.0946765	0.406172	Nonsignificant	SA-E vs SA
TRINITY_DN1246_c0_g1_i1	195	35	0.154771	0.20395	Nonsignificant	SA-E vs SA
TRINITY_DN1246_c0_g2_i1	44	4	0.729435	-0.333114	Nonsignificant	SA-E vs SA
TRINITY_DN1246_c0_g3_i1	137.17	110.08	1.13604e-19	1.38636	Upregulated	SA-E vs SA
TRINITY_DN1246_c0_g3_i2	809.01	112.94	0.527192	0.00554198	Nonsignificant	SA-E vs SA
TRINITY_DN1246_c0_g3_i3	1615.82	202.97	0.963688	-0.0778193	Nonsignificant	SA-E vs SA
TRINITY_DN12481_c0_g1_i1	109	8	0.203903	-0.50208	Nonsignificant	SA-E vs SA
TRINITY_DN12481_c1_g1_i1	39	3	0.564053	-0.465006	Nonsignificant	SA-E vs SA
TRINITY_DN12487_c0_g1_i1	18444	1670	0.0270536	-0.336288	Downregulated	SA-E vs SA
TRINITY_DN12487_c0_g3_i1	178	7	0.0028866	-0.994713	Downregulated	SA-E vs SA
TRINITY_DN125_c0_g1_i12	23233.4	5454.05	1.00783e-05	0.41587	Upregulated	SA-E vs SA
TRINITY_DN125_c0_g1_i6	21.01	0.15	0.0433314	-2.34182	Downregulated	SA-E vs SA
TRINITY_DN1255_c0_g1_i1	101.92	21.69	0.0765952	0.338417	Nonsignificant	SA-E vs SA
TRINITY_DN1255_c0_g1_i2	124.25	45.04	2.19303e-05	0.758907	Upregulated	SA-E vs SA
TRINITY_DN1255_c0_g1_i3	1170.84	70.27	8.31767e-05	-0.660951	Downregulated	SA-E vs SA
TRINITY_DN12595_c0_g2_i1	22	8	0.0798343	0.76139	Nonsignificant	SA-E vs SA
TRINITY_DN126_c1_g1_i1	175	13	0.134859	-0.49255	Nonsignificant	SA-E vs SA
TRINITY_DN1260_c0_g1_i2	177	20	0.774429	-0.161412	Nonsignificant	SA-E vs SA
TRINITY_DN12600_c0_g6_i1	29	8	0.146673	0.543283	Nonsignificant	SA-E vs SA
TRINITY_DN12603_c0_g1_i4	4709.43	564	0.796419	-0.115502	Nonsignificant	SA-E vs SA
TRINITY_DN12603_c0_g2_i1	62	6	0.776602	-0.283753	Nonsignificant	SA-E vs SA
TRINITY_DN12603_c0_g3_i1	15	2	1	-0.0307348	Nonsignificant	SA-E vs SA
TRINITY_DN12603_c0_g5_i1	64	14	0.150804	0.360137	Nonsignificant	SA-E vs SA
TRINITY_DN12603_c1_g2_i1	349	43	1	-0.0930824	Nonsignificant	SA-E vs SA
TRINITY_DN1262_c0_g1_i1	11	35	3.96752e-16	2.4739	Upregulated	SA-E vs SA
TRINITY_DN1262_c0_g2_i1	2	18	1.24618e-08	3.29481	Upregulated	SA-E vs SA
TRINITY_DN1262_c0_g3_i1	17	1	0.759851	-0.676805	Nonsignificant	SA-E vs SA
TRINITY_DN1262_c0_g5_i1	47	15	0.0197076	0.65836	Upregulated	SA-E vs SA
TRINITY_DN1262_c0_g8_i1	781	509	3.60595e-25	1.22205	Upregulated	SA-E vs SA
TRINITY_DN1264_c0_g1_i1	889	113	0.907093	-0.0684791	Nonsignificant	SA-E vs SA
TRINITY_DN1264_c0_g2_i1	2536	225	0.0323194	-0.352337	Downregulated	SA-E vs SA
TRINITY_DN1265_c0_g1_i1	252	23	0.262704	-0.329987	Nonsignificant	SA-E vs SA
TRINITY_DN1265_c0_g2_i1	911	80	0.0592469	-0.360448	Nonsignificant	SA-E vs SA
TRINITY_DN1265_c1_g1_i1	279	14	0.00265213	-0.802292	Downregulated	SA-E vs SA
TRINITY_DN1266_c0_g1_i2	1780	177	0.169599	-0.262313	Nonsignificant	SA-E vs SA
TRINITY_DN1266_c0_g1_i3	383	45	0.840101	-0.130585	Nonsignificant	SA-E vs SA
TRINITY_DN12660_c0_g1_i1	124	22	0.249549	0.194802	Nonsignificant	SA-E vs SA
TRINITY_DN12676_c0_g1_i2	3229.67	643	0.00164451	0.285792	Upregulated	SA-E vs SA
TRINITY_DN12676_c0_g2_i1	622.1	118	0.0183065	0.247559	Upregulated	SA-E vs SA
TRINITY_DN12676_c0_g4_i1	322	35	0.604169	-0.192034	Nonsignificant	SA-E vs SA
TRINITY_DN12676_c1_g1_i1	729	114	0.200576	0.0951359	Nonsignificant	SA-E vs SA
TRINITY_DN12676_c2_g1_i1	248	25	0.48573	-0.251524	Nonsignificant	SA-E vs SA
TRINITY_DN1276_c0_g1_i1	574	42	0.0132456	-0.50449	Downregulated	SA-E vs SA
TRINITY_DN128_c2_g1_i10	147	5.06	0.00316175	-1.09987	Downregulated	SA-E vs SA
TRINITY_DN128_c2_g1_i5	204	18	0.271889	-0.356684	Nonsignificant	SA-E vs SA
TRINITY_DN1281_c0_g1_i1	108	6	0.0773406	-0.721933	Nonsignificant	SA-E vs SA
TRINITY_DN1289_c0_g1_i1	37.95	5.32	1	0.00882521	Nonsignificant	SA-E vs SA
TRINITY_DN1289_c0_g2_i1	833	220	4.9624e-06	0.508898	Upregulated	SA-E vs SA
TRINITY_DN129_c0_g1_i2	16	6	0.11103	0.785684	Nonsignificant	SA-E vs SA
TRINITY_DN129_c0_g2_i1	35549.2	2436	3.36888e-05	-0.556284	Downregulated	SA-E vs SA
TRINITY_DN1292_c0_g2_i1	724	45	0.000781281	-0.633315	Downregulated	SA-E vs SA
TRINITY_DN12962_c0_g1_i1	26	6	0.430494	0.402367	Nonsignificant	SA-E vs SA
TRINITY_DN13_c0_g3_i2	18	1	0.559728	-0.721932	Nonsignificant	SA-E vs SA
TRINITY_DN13_c1_g4_i1	18	12	0.000421961	1.23994	Upregulated	SA-E vs SA
TRINITY_DN1304_c0_g1_i3	19	2	1	-0.217368	Nonsignificant	SA-E vs SA
TRINITY_DN13047_c0_g1_i1	13	11	0.000556462	1.42817	Upregulated	SA-E vs SA
TRINITY_DN13074_c0_g1_i1	40	54	1.43764e-17	1.797	Upregulated	SA-E vs SA
TRINITY_DN13078_c0_g1_i2	1834	109	1.70172e-05	-0.668668	Downregulated	SA-E vs SA
TRINITY_DN13078_c0_g3_i1	385.74	31	0.0697616	-0.430447	Nonsignificant	SA-E vs SA
TRINITY_DN1308_c0_g1_i1	148.9	22	0.596868	0.0503251	Nonsignificant	SA-E vs SA
TRINITY_DN1308_c0_g2_i1	198	9	0.00498626	-0.880366	Downregulated	SA-E vs SA
TRINITY_DN13085_c0_g1_i1	267	23	0.169801	-0.375637	Nonsignificant	SA-E vs SA
TRINITY_DN1313_c0_g1_i1	63	2	0.0506662	-1.16376	Nonsignificant	SA-E vs SA
TRINITY_DN1313_c0_g3_i1	395	49	1	-0.0877086	Nonsignificant	SA-E vs SA
TRINITY_DN1313_c0_g4_i3	2026.53	213.59	0.307166	-0.216366	Nonsignificant	SA-E vs SA
TRINITY_DN1313_c0_g5_i1	983.47	58.41	0.000120885	-0.669216	Downregulated	SA-E vs SA
TRINITY_DN13133_c0_g1_i1	33	3	0.840383	-0.333114	Nonsignificant	SA-E vs SA
TRINITY_DN13133_c1_g1_i1	246	37	0.462048	0.0643934	Nonsignificant	SA-E vs SA
TRINITY_DN1316_c0_g1_i1	53	5	0.755864	-0.303869	Nonsignificant	SA-E vs SA
TRINITY_DN1318_c0_g1_i1	273	6	2.20435e-06	-1.45408	Downregulated	SA-E vs SA
TRINITY_DN1318_c1_g1_i1	199	30	0.461356	0.0662142	Nonsignificant	SA-E vs SA
TRINITY_DN1320_c0_g1_i1	2322.4	254.38	0.413703	-0.185973	Nonsignificant	SA-E vs SA
TRINITY_DN1320_c0_g1_i3	429.6	86.62	0.0118003	0.295793	Upregulated	SA-E vs SA
TRINITY_DN1320_c0_g2_i1	165	8	0.0114779	-0.829412	Downregulated	SA-E vs SA
TRINITY_DN1323_c0_g1_i1	23	19	3.55231e-06	1.40922	Upregulated	SA-E vs SA
TRINITY_DN1323_c4_g1_i1	16	1	0.759851	-0.628941	Nonsignificant	SA-E vs SA
TRINITY_DN1324_c0_g1_i1	274	27	0.385166	-0.269476	Nonsignificant	SA-E vs SA
TRINITY_DN1327_c0_g1_i1	503	39	0.0312715	-0.458753	Downregulated	SA-E vs SA
TRINITY_DN1327_c0_g2_i1	852.34	106.54	0.98383	-0.0817079	Nonsignificant	SA-E vs SA
TRINITY_DN1327_c0_g2_i3	488.66	15.46	1.7718e-07	-1.16646	Downregulated	SA-E vs SA
TRINITY_DN1327_c1_g2_i1	246.67	11	0.00142613	-0.895457	Downregulated	SA-E vs SA
TRINITY_DN1330_c0_g1_i1	64	8	1	-0.0816893	Nonsignificant	SA-E vs SA
TRINITY_DN13306_c0_g1_i1	307	46	0.423119	0.061399	Nonsignificant	SA-E vs SA
TRINITY_DN13306_c0_g2_i1	65	9	0.897141	-0.000938401	Nonsignificant	SA-E vs SA
TRINITY_DN13306_c1_g1_i1	135	5	0.00564883	-1.04205	Downregulated	SA-E vs SA
TRINITY_DN13306_c1_g2_i1	1050.27	156	0.299354	0.0544984	Nonsignificant	SA-E vs SA
TRINITY_DN1332_c0_g1_i1	4101.87	541	0.703276	-0.0393219	Nonsignificant	SA-E vs SA
TRINITY_DN1332_c0_g2_i1	490	56	0.688853	-0.15244	Nonsignificant	SA-E vs SA
TRINITY_DN13358_c0_g1_i1	230	33	0.574873	0.0271612	Nonsignificant	SA-E vs SA
TRINITY_DN134_c0_g1_i4	552.13	39.34	0.0091219	-0.525477	Downregulated	SA-E vs SA
TRINITY_DN134_c0_g1_i5	1164.87	165.66	0.423249	0.0201696	Nonsignificant	SA-E vs SA
TRINITY_DN134_c0_g2_i1	142	15	0.67534	-0.214593	Nonsignificant	SA-E vs SA
TRINITY_DN134_c0_g3_i1	1110	121	0.445681	-0.189761	Nonsignificant	SA-E vs SA
TRINITY_DN134_c0_g4_i1	235	70	3.20679e-05	0.603889	Upregulated	SA-E vs SA
TRINITY_DN1341_c0_g1_i1	206	25	0.949416	-0.105027	Nonsignificant	SA-E vs SA
TRINITY_DN1342_c0_g1_i2	767.24	113.31	0.347027	0.0499779	Nonsignificant	SA-E vs SA
TRINITY_DN1342_c0_g1_i3	402.4	251.55	2.44077e-21	1.18915	Upregulated	SA-E vs SA
TRINITY_DN1342_c0_g1_i5	466.37	78.14	0.134109	0.149611	Nonsignificant	SA-E vs SA
TRINITY_DN1342_c0_g2_i1	87	8	0.555449	-0.324091	Nonsignificant	SA-E vs SA
TRINITY_DN1342_c0_g3_i1	176	14	0.164738	-0.43854	Nonsignificant	SA-E vs SA
TRINITY_DN1344_c0_g1_i1	4383.85	435.4	0.13208	-0.263259	Nonsignificant	SA-E vs SA
TRINITY_DN1344_c0_g1_i2	112.15	8.6	0.299181	-0.467474	Nonsignificant	SA-E vs SA
TRINITY_DN1344_c0_g2_i1	460	50	0.543669	-0.192034	Nonsignificant	SA-E vs SA
TRINITY_DN1344_c0_g3_i1	397	30	0.0386181	-0.479051	Downregulated	SA-E vs SA
TRINITY_DN1349_c0_g1_i1	23	3	1	-0.0480876	Nonsignificant	SA-E vs SA
TRINITY_DN135_c0_g1_i16	2740.43	9	1.4478e-47	-2.9549	Downregulated	SA-E vs SA
TRINITY_DN135_c4_g1_i3	339	21	0.00849732	-0.635959	Downregulated	SA-E vs SA
TRINITY_DN13536_c0_g1_i1	29	36	1.39298e-12	1.73078	Upregulated	SA-E vs SA
TRINITY_DN13539_c0_g1_i1	72	5	0.339516	-0.545757	Nonsignificant	SA-E vs SA
TRINITY_DN13550_c0_g1_i1	190	32	0.268681	0.153708	Nonsignificant	SA-E vs SA
TRINITY_DN13559_c0_g1_i1	414	9	1.69804e-08	-1.46271	Downregulated	SA-E vs SA
TRINITY_DN13596_c1_g1_i1	223	11	0.00538664	-0.81581	Downregulated	SA-E vs SA
TRINITY_DN136_c0_g1_i1	489	98	0.0102315	0.291	Upregulated	SA-E vs SA
TRINITY_DN136_c0_g2_i1	557	105	0.024342	0.242673	Upregulated	SA-E vs SA
TRINITY_DN13611_c0_g3_i1	1011	77	0.00840544	-0.472854	Downregulated	SA-E vs SA
TRINITY_DN13648_c0_g1_i1	385	17	0.000142372	-0.903252	Downregulated	SA-E vs SA
TRINITY_DN1367_c1_g1_i3	2408.39	197.81	0.00954184	-0.413259	Downregulated	SA-E vs SA
TRINITY_DN1367_c1_g1_i5	29.53	6.8	0.278164	0.400672	Nonsignificant	SA-E vs SA
TRINITY_DN1367_c1_g1_i8	646.9	24.8	5.16232e-07	-1.01483	Downregulated	SA-E vs SA
TRINITY_DN1367_c1_g2_i1	337	41	0.964884	-0.103061	Nonsignificant	SA-E vs SA
TRINITY_DN1367_c1_g3_i1	603	11	5.85579e-12	-1.60118	Downregulated	SA-E vs SA
TRINITY_DN1373_c0_g1_i1	1444	133	0.0748171	-0.322794	Nonsignificant	SA-E vs SA
TRINITY_DN1377_c0_g1_i1	505.89	98.05	0.0180841	0.264593	Upregulated	SA-E vs SA
TRINITY_DN1377_c0_g1_i11	248.76	251.45	6.59196e-32	1.56856	Upregulated	SA-E vs SA
TRINITY_DN1377_c0_g1_i4	270.13	35.7	0.799912	-0.037722	Nonsignificant	SA-E vs SA
TRINITY_DN1377_c0_g1_i5	8466.21	1101.81	0.762398	-0.0498617	Nonsignificant	SA-E vs SA
TRINITY_DN138_c0_g1_i8	207	2	1.99595e-07	-2.10296	Downregulated	SA-E vs SA
TRINITY_DN1380_c0_g1_i2	82.21	7	0.464237	-0.384805	Nonsignificant	SA-E vs SA
TRINITY_DN1380_c0_g1_i3	1010.48	136.49	0.65925	-0.0204922	Nonsignificant	SA-E vs SA
TRINITY_DN1380_c0_g1_i5	2340.52	266.51	0.579735	-0.155332	Nonsignificant	SA-E vs SA
TRINITY_DN1380_c0_g3_i1	222	17	0.109585	-0.468571	Nonsignificant	SA-E vs SA
TRINITY_DN13823_c0_g1_i1	64	6	0.674636	-0.308819	Nonsignificant	SA-E vs SA
TRINITY_DN13829_c0_g2_i1	63	6	0.674636	-0.296386	Nonsignificant	SA-E vs SA
TRINITY_DN13829_c1_g2_i1	61	17	0.0300003	0.551331	Upregulated	SA-E vs SA
TRINITY_DN13829_c1_g3_i2	2202.08	172.83	0.00465448	-0.449137	Downregulated	SA-E vs SA
TRINITY_DN13829_c1_g3_i3	9928.66	266.42	1.68674e-22	-1.29649	Downregulated	SA-E vs SA
TRINITY_DN13829_c1_g3_i4	510.98	33.78	0.00627578	-0.584628	Downregulated	SA-E vs SA
TRINITY_DN13829_c1_g3_i6	2867.97	400.84	0.448561	0.00645559	Nonsignificant	SA-E vs SA
TRINITY_DN13829_c1_g3_i8	619.57	212.13	1.53856e-09	0.71384	Upregulated	SA-E vs SA
TRINITY_DN13899_c0_g2_i1	119	16	0.858204	-0.0241282	Nonsignificant	SA-E vs SA
TRINITY_DN139_c0_g1_i5	359.06	99.4	3.03679e-05	0.546059	Upregulated	SA-E vs SA
TRINITY_DN139_c0_g1_i6	749.07	38.6	3.80941e-05	-0.781311	Downregulated	SA-E vs SA
TRINITY_DN139_c0_g2_i1	204	13	0.0410173	-0.61361	Downregulated	SA-E vs SA
TRINITY_DN139_c0_g3_i1	739	127	0.0647263	0.169638	Nonsignificant	SA-E vs SA
TRINITY_DN14_c1_g1_i11	92.89	21.13	0.0636857	0.39101	Nonsignificant	SA-E vs SA
TRINITY_DN14_c1_g1_i3	63.11	7.87	1	-0.0835681	Nonsignificant	SA-E vs SA
TRINITY_DN14_c1_g1_i4	14	1	1	-0.523515	Nonsignificant	SA-E vs SA
TRINITY_DN1404_c0_g1_i1	17	6	0.11103	0.73782	Nonsignificant	SA-E vs SA
TRINITY_DN14049_c0_g1_i1	2	24	4.79413e-11	3.52194	Upregulated	SA-E vs SA
TRINITY_DN14049_c0_g2_i1	12	2	1	0.145441	Nonsignificant	SA-E vs SA
TRINITY_DN14051_c0_g1_i2	45	10	0.240748	0.372571	Nonsignificant	SA-E vs SA
TRINITY_DN141_c1_g1_i1	18	6	0.186747	0.692693	Nonsignificant	SA-E vs SA
TRINITY_DN141_c1_g8_i1	21	2	1	-0.296386	Nonsignificant	SA-E vs SA
TRINITY_DN14116_c0_g1_i1	35	12	0.023845	0.714934	Upregulated	SA-E vs SA
TRINITY_DN1413_c0_g1_i1	95	22	0.057001	0.405133	Nonsignificant	SA-E vs SA
TRINITY_DN1414_c0_g1_i2	2090.34	380	0.0138697	0.214009	Upregulated	SA-E vs SA
TRINITY_DN14192_c0_g1_i1	3972	407	0.198355	-0.238622	Nonsignificant	SA-E vs SA
TRINITY_DN14192_c0_g2_i1	2299	423	0.0104493	0.223526	Upregulated	SA-E vs SA
TRINITY_DN142_c0_g2_i1	26	8	0.094398	0.629497	Nonsignificant	SA-E vs SA
TRINITY_DN1420_c0_g1_i4	256	2	4.23223e-09	-2.2707	Downregulated	SA-E vs SA
TRINITY_DN143_c0_g2_i1	87	35	2.26777e-05	0.841163	Upregulated	SA-E vs SA
TRINITY_DN14390_c0_g1_i1	151	14	0.405	-0.317582	Nonsignificant	SA-E vs SA
TRINITY_DN14395_c0_g1_i1	1816	150	0.0130129	-0.408798	Downregulated	SA-E vs SA
TRINITY_DN14395_c1_g1_i1	307.37	432	8.05735e-45	1.8288	Upregulated	SA-E vs SA
TRINITY_DN14395_c1_g1_i3	403	23.37	0.00225438	-0.688072	Downregulated	SA-E vs SA
TRINITY_DN14427_c0_g1_i1	34	9	0.137985	0.51069	Nonsignificant	SA-E vs SA
TRINITY_DN14487_c0_g1_i1	43	8	0.533661	0.232288	Nonsignificant	SA-E vs SA
TRINITY_DN14499_c0_g1_i1	172	25	0.629434	0.0373879	Nonsignificant	SA-E vs SA
TRINITY_DN1453_c1_g1_i1	490	6	2.01948e-12	-1.9159	Downregulated	SA-E vs SA
TRINITY_DN14547_c0_g1_i1	145.05	17.99	1	-0.0878641	Nonsignificant	SA-E vs SA
TRINITY_DN14547_c0_g1_i2	38.95	0.01	0.00339444	-4.96715	Downregulated	SA-E vs SA
TRINITY_DN1456_c0_g1_i1	1325	124	0.0954469	-0.310211	Nonsignificant	SA-E vs SA
TRINITY_DN1456_c0_g2_i1	338	26	0.0537516	-0.465006	Nonsignificant	SA-E vs SA
TRINITY_DN1456_c0_g3_i1	363	20	0.00217941	-0.728485	Downregulated	SA-E vs SA
TRINITY_DN14576_c0_g1_i1	47	13	0.0575192	0.54538	Nonsignificant	SA-E vs SA
TRINITY_DN1459_c0_g1_i1	453	43	0.215367	-0.299004	Nonsignificant	SA-E vs SA
TRINITY_DN146_c1_g4_i1	24	6	0.311691	0.465563	Nonsignificant	SA-E vs SA
TRINITY_DN1461_c0_g1_i1	916	170	0.0175268	0.230347	Upregulated	SA-E vs SA
TRINITY_DN1461_c1_g1_i2	6060.57	653	0.327889	-0.198965	Nonsignificant	SA-E vs SA
TRINITY_DN1461_c1_g2_i1	548	34	0.00191661	-0.634725	Downregulated	SA-E vs SA
TRINITY_DN1461_c1_g3_i1	1329.17	214.51	0.107057	0.120023	Nonsignificant	SA-E vs SA
TRINITY_DN1461_c1_g3_i2	203.83	9.49	0.00337854	-0.861422	Downregulated	SA-E vs SA
TRINITY_DN1461_c2_g1_i1	526	47	0.118194	-0.34674	Nonsignificant	SA-E vs SA
TRINITY_DN1461_c3_g1_i1	156	14	0.369281	-0.343302	Nonsignificant	SA-E vs SA
TRINITY_DN14660_c1_g1_i1	73	1	0.00401524	-1.82733	Downregulated	SA-E vs SA
TRINITY_DN1467_c0_g1_i1	84	10	1	-0.12021	Nonsignificant	SA-E vs SA
TRINITY_DN1467_c0_g2_i1	4598	631	0.514145	-0.00797162	Nonsignificant	SA-E vs SA
TRINITY_DN1469_c0_g1_i1	360	14	4.31553e-05	-1.00353	Downregulated	SA-E vs SA
TRINITY_DN1469_c1_g1_i1	162	31	0.109585	0.254513	Nonsignificant	SA-E vs SA
TRINITY_DN147_c0_g2_i2	96	36	5.94916e-05	0.785684	Upregulated	SA-E vs SA
TRINITY_DN1473_c0_g1_i1	72	15	0.17783	0.321616	Nonsignificant	SA-E vs SA
TRINITY_DN1478_c0_g1_i1	15	4	0.439814	0.516517	Nonsignificant	SA-E vs SA
TRINITY_DN1479_c0_g1_i1	14	2	1	0.0237363	Nonsignificant	SA-E vs SA
TRINITY_DN1491_c0_g1_i1	584	110	0.0224066	0.242029	Upregulated	SA-E vs SA
TRINITY_DN1491_c0_g2_i1	325	19	0.00614691	-0.681679	Downregulated	SA-E vs SA
TRINITY_DN1496_c0_g1_i1	47	10	0.254666	0.338238	Nonsignificant	SA-E vs SA
TRINITY_DN1497_c1_g1_i1	6230.4	639.12	0.189935	-0.237747	Nonsignificant	SA-E vs SA
TRINITY_DN1497_c1_g1_i2	530.78	21.04	3.9527e-06	-0.988435	Downregulated	SA-E vs SA
TRINITY_DN1497_c1_g1_i4	279.81	50.84	0.0876734	0.213601	Nonsignificant	SA-E vs SA
TRINITY_DN1497_c2_g1_i1	3638.19	459.72	0.923028	-0.0731488	Nonsignificant	SA-E vs SA
TRINITY_DN1497_c2_g1_i2	74.81	27.28	0.000535418	0.763603	Upregulated	SA-E vs SA
TRINITY_DN14995_c0_g1_i1	147	22	0.54302	0.0604644	Nonsignificant	SA-E vs SA
TRINITY_DN14999_c0_g1_i1	142	6	0.0108903	-0.938021	Downregulated	SA-E vs SA
TRINITY_DN15_c0_g1_i10	1018.95	56.08	2.61884e-05	-0.729336	Downregulated	SA-E vs SA
TRINITY_DN15_c0_g1_i12	37	19	0.000142624	1.03387	Upregulated	SA-E vs SA
TRINITY_DN15_c0_g1_i13	610.29	110.68	0.0369132	0.21213	Upregulated	SA-E vs SA
TRINITY_DN15_c0_g1_i5	209.63	17.44	0.1509	-0.40313	Nonsignificant	SA-E vs SA
TRINITY_DN15_c0_g1_i7	2053	44.95	3.62292e-19	-1.45708	Downregulated	SA-E vs SA
TRINITY_DN15_c0_g1_i8	721.92	25.52	6.86781e-08	-1.07886	Downregulated	SA-E vs SA
TRINITY_DN15_c0_g2_i1	1617.76	222.97	0.533676	-0.00456854	Nonsignificant	SA-E vs SA
TRINITY_DN15_c0_g2_i3	1018.24	194.03	0.00948141	0.25119	Upregulated	SA-E vs SA
TRINITY_DN15_c1_g1_i2	765	34.17	2.12298e-06	-0.894171	Downregulated	SA-E vs SA
TRINITY_DN1501_c0_g5_i1	28	6	0.335094	0.343858	Nonsignificant	SA-E vs SA
TRINITY_DN15036_c0_g1_i2	14	17	4.53154e-07	1.71336	Upregulated	SA-E vs SA
TRINITY_DN15040_c0_g1_i1	77	44	9.14061e-09	1.11824	Upregulated	SA-E vs SA
TRINITY_DN15116_c0_g1_i3	44	3.23	0.470867	-0.501922	Nonsignificant	SA-E vs SA
TRINITY_DN1513_c0_g1_i1	43	1	0.0654974	-1.40947	Nonsignificant	SA-E vs SA
TRINITY_DN1514_c0_g1_i3	661.16	40	0.000725451	-0.654622	Downregulated	SA-E vs SA
TRINITY_DN1514_c0_g1_i5	77.17	29	0.000236571	0.787354	Upregulated	SA-E vs SA
TRINITY_DN1514_c0_g1_i8	93	2	0.00318237	-1.47125	Downregulated	SA-E vs SA
TRINITY_DN1515_c0_g1_i1	127	5	0.0117205	-0.993825	Downregulated	SA-E vs SA
TRINITY_DN15195_c0_g1_i1	1158	115	0.193422	-0.263338	Nonsignificant	SA-E vs SA
TRINITY_DN15195_c0_g2_i1	92.32	30.71	0.000508818	0.691066	Upregulated	SA-E vs SA
TRINITY_DN15195_c0_g2_i2	515.68	9.29	5.63903e-11	-1.61107	Downregulated	SA-E vs SA
TRINITY_DN152_c0_g1_i1	67046	6720	0.127054	-0.256054	Nonsignificant	SA-E vs SA
TRINITY_DN152_c0_g2_i1	244	28	0.819516	-0.149211	Nonsignificant	SA-E vs SA
TRINITY_DN152_c0_g3_i1	70	11	0.62586	0.0989851	Nonsignificant	SA-E vs SA
TRINITY_DN1525_c0_g1_i1	1014	129	0.917375	-0.0677973	Nonsignificant	SA-E vs SA
TRINITY_DN15285_c0_g1_i1	24	2	0.81105	-0.401811	Nonsignificant	SA-E vs SA
TRINITY_DN15285_c1_g1_i1	58	3	0.195974	-0.778351	Nonsignificant	SA-E vs SA
TRINITY_DN153_c0_g1_i11	42.72	3	0.470867	-0.536936	Nonsignificant	SA-E vs SA
TRINITY_DN1535_c0_g2_i1	11	16	1.75007e-07	1.85589	Upregulated	SA-E vs SA
TRINITY_DN1541_c0_g1_i1	183	8	0.00464257	-0.911159	Downregulated	SA-E vs SA
TRINITY_DN1541_c1_g1_i1	518	53	0.354351	-0.239784	Nonsignificant	SA-E vs SA
TRINITY_DN15413_c0_g1_i1	91	8	0.418763	-0.359581	Nonsignificant	SA-E vs SA
TRINITY_DN15420_c0_g1_i1	417	46	0.590568	-0.180382	Nonsignificant	SA-E vs SA
TRINITY_DN15437_c0_g1_i2	154	3	0.000206754	-1.54932	Downregulated	SA-E vs SA
TRINITY_DN1545_c0_g1_i1	453	33	0.0220465	-0.507984	Downregulated	SA-E vs SA
TRINITY_DN1545_c0_g2_i2	231	32	0.693425	-0.000558789	Nonsignificant	SA-E vs SA
TRINITY_DN1545_c0_g2_i3	574	102	0.0513877	0.196051	Nonsignificant	SA-E vs SA
TRINITY_DN1547_c0_g1_i1	314	11	3.61538e-05	-1.086	Downregulated	SA-E vs SA
TRINITY_DN1550_c0_g1_i5	37	5	1	-0.0201373	Nonsignificant	SA-E vs SA
TRINITY_DN1550_c0_g1_i7	53	5	0.755864	-0.303869	Nonsignificant	SA-E vs SA
TRINITY_DN1558_c0_g2_i2	149	7	0.0154208	-0.854307	Downregulated	SA-E vs SA
TRINITY_DN1559_c0_g1_i1	140	12	0.328534	-0.37957	Nonsignificant	SA-E vs SA
TRINITY_DN1559_c0_g2_i1	1157	110	0.1269	-0.297752	Nonsignificant	SA-E vs SA
TRINITY_DN1559_c0_g3_i1	1540	318	0.00122336	0.314613	Upregulated	SA-E vs SA
TRINITY_DN156_c0_g3_i1	20.11	23.89	2.72686e-09	1.69605	Upregulated	SA-E vs SA
TRINITY_DN156_c0_g3_i2	12.89	6.11	0.0884894	0.970672	Nonsignificant	SA-E vs SA
TRINITY_DN1562_c0_g1_i3	290.91	63.54	0.0073205	0.358938	Upregulated	SA-E vs SA
TRINITY_DN1562_c0_g2_i1	171.15	10	0.0373851	-0.682128	Downregulated	SA-E vs SA
TRINITY_DN1562_c1_g1_i1	77	4	0.13189	-0.774941	Nonsignificant	SA-E vs SA
TRINITY_DN15628_c0_g1_i2	21	0.98	0.401742	-0.859587	Nonsignificant	SA-E vs SA
TRINITY_DN15655_c0_g1_i1	144	9	0.0806944	-0.628941	Nonsignificant	SA-E vs SA
TRINITY_DN157_c0_g1_i3	268	6	3.53068e-06	-1.43949	Downregulated	SA-E vs SA
TRINITY_DN157_c0_g2_i3	3378.35	445	0.712523	-0.0403399	Nonsignificant	SA-E vs SA
TRINITY_DN157_c1_g1_i2	993.89	81	0.0209397	-0.419394	Downregulated	SA-E vs SA
TRINITY_DN1577_c0_g1_i1	28	13	0.00401524	0.954305	Upregulated	SA-E vs SA
TRINITY_DN1583_c0_g1_i2	183	31	0.254842	0.158279	Nonsignificant	SA-E vs SA
TRINITY_DN1583_c0_g1_i3	45	17	0.005121	0.791511	Upregulated	SA-E vs SA
TRINITY_DN1586_c0_g1_i1	48	16	0.0112329	0.692693	Upregulated	SA-E vs SA
TRINITY_DN159_c0_g1_i1	632.47	65	0.341272	-0.23628	Nonsignificant	SA-E vs SA
TRINITY_DN1590_c0_g1_i2	590.16	22.18	6.81629e-07	-1.0305	Downregulated	SA-E vs SA
TRINITY_DN1590_c0_g1_i3	20.84	2.82	1	-0.0190771	Nonsignificant	SA-E vs SA
TRINITY_DN1590_c0_g2_i1	733	253	4.97535e-10	0.720212	Upregulated	SA-E vs SA
TRINITY_DN1591_c0_g1_i1	1311	292.83	0.000222782	0.376616	Upregulated	SA-E vs SA
TRINITY_DN1591_c0_g1_i2	47	9.17	0.37983	0.269829	Nonsignificant	SA-E vs SA
TRINITY_DN1591_c0_g3_i1	94	4	0.0340935	-0.932441	Downregulated	SA-E vs SA
TRINITY_DN1593_c0_g6_i1	64	2	0.0370978	-1.17619	Downregulated	SA-E vs SA
TRINITY_DN1603_c1_g1_i1	94	11	1	-0.133764	Nonsignificant	SA-E vs SA
TRINITY_DN16093_c0_g1_i1	65	18	0.0266216	0.546313	Upregulated	SA-E vs SA
TRINITY_DN161_c0_g1_i1	151540	60837.4	8.7516e-16	0.839515	Upregulated	SA-E vs SA
TRINITY_DN161_c0_g1_i3	36332.6	7884.57	0.000103489	0.353835	Upregulated	SA-E vs SA
TRINITY_DN16154_c0_g1_i1	210	14	0.0556849	-0.577987	Nonsignificant	SA-E vs SA
TRINITY_DN16156_c0_g1_i1	538	81	0.324282	0.0651862	Nonsignificant	SA-E vs SA
TRINITY_DN16160_c0_g1_i1	606.38	32	0.000121707	-0.762514	Downregulated	SA-E vs SA
TRINITY_DN16160_c0_g1_i2	7.62	27	6.97018e-13	2.55885	Upregulated	SA-E vs SA
TRINITY_DN16160_c0_g2_i1	682	108	0.183592	0.105066	Nonsignificant	SA-E vs SA
TRINITY_DN16189_c0_g1_i2	175	9	0.0154611	-0.782876	Downregulated	SA-E vs SA
TRINITY_DN162_c0_g1_i1	661.58	94.26	0.483943	0.0216328	Nonsignificant	SA-E vs SA
TRINITY_DN162_c0_g1_i5	469.85	61.74	0.791515	-0.0422451	Nonsignificant	SA-E vs SA
TRINITY_DN1622_c0_g1_i2	347	42	0.931398	-0.107123	Nonsignificant	SA-E vs SA
TRINITY_DN16268_c0_g1_i1	269	49	0.0965446	0.215604	Nonsignificant	SA-E vs SA
TRINITY_DN16291_c0_g1_i1	189	16	0.245219	-0.389378	Nonsignificant	SA-E vs SA
TRINITY_DN163_c0_g1_i3	27	68	1.13906e-27	2.28932	Upregulated	SA-E vs SA
TRINITY_DN1630_c0_g2_i1	67	13	0.287635	0.26546	Nonsignificant	SA-E vs SA
TRINITY_DN16321_c0_g1_i1	487	38	0.0363118	-0.453739	Downregulated	SA-E vs SA
TRINITY_DN16324_c0_g1_i1	174	5	0.000486893	-1.24242	Downregulated	SA-E vs SA
TRINITY_DN1637_c0_g1_i1	83	8	0.633545	-0.28693	Nonsignificant	SA-E vs SA
TRINITY_DN1643_c0_g1_i1	327	12	4.92845e-05	-1.04933	Downregulated	SA-E vs SA
TRINITY_DN16439_c0_g1_i1	24	7	0.175453	0.587267	Nonsignificant	SA-E vs SA
TRINITY_DN1646_c0_g1_i1	196.79	7	0.000899355	-1.07394	Downregulated	SA-E vs SA
TRINITY_DN1646_c0_g1_i4	218923	42418.7	0.00189258	0.264365	Upregulated	SA-E vs SA
TRINITY_DN1646_c0_g1_i7	348.72	62.31	0.0952167	0.200401	Nonsignificant	SA-E vs SA
TRINITY_DN1646_c0_g1_i8	705.75	243	6.12163e-10	0.718283	Upregulated	SA-E vs SA
TRINITY_DN1646_c0_g2_i1	403	38	0.23256	-0.304261	Nonsignificant	SA-E vs SA
TRINITY_DN1646_c1_g1_i2	4176	432	0.21958	-0.231099	Nonsignificant	SA-E vs SA
TRINITY_DN1646_c1_g2_i1	62	10	0.600301	0.119553	Nonsignificant	SA-E vs SA
TRINITY_DN1646_c1_g3_i1	65	47	9.84087e-11	1.30407	Upregulated	SA-E vs SA
TRINITY_DN1646_c1_g4_i1	371	48	0.904214	-0.054498	Nonsignificant	SA-E vs SA
TRINITY_DN16492_c0_g1_i1	6	33	7.35991e-15	2.90599	Upregulated	SA-E vs SA
TRINITY_DN1650_c0_g1_i1	156	93	4.19936e-14	1.15168	Upregulated	SA-E vs SA
TRINITY_DN16510_c0_g1_i1	112	11	0.620038	-0.272091	Nonsignificant	SA-E vs SA
TRINITY_DN16513_c0_g1_i1	200	10	0.00893797	-0.805117	Downregulated	SA-E vs SA
TRINITY_DN16513_c0_g1_i6	3465.56	411.87	0.762735	-0.121544	Nonsignificant	SA-E vs SA
TRINITY_DN16513_c0_g1_i7	460.44	14.13	3.14289e-07	-1.19052	Downregulated	SA-E vs SA
TRINITY_DN16513_c0_g2_i1	581	31	0.000182105	-0.753823	Downregulated	SA-E vs SA
TRINITY_DN16513_c0_g3_i1	16	26	9.12761e-11	1.94338	Upregulated	SA-E vs SA
TRINITY_DN16513_c0_g4_i1	329	32	0.340334	-0.279764	Nonsignificant	SA-E vs SA
TRINITY_DN16513_c2_g1_i1	57	18	0.0107729	0.650005	Upregulated	SA-E vs SA
TRINITY_DN1652_c0_g1_i1	95.81	26.25	0.00937491	0.537877	Upregulated	SA-E vs SA
TRINITY_DN1652_c0_g1_i3	1679.19	288.75	0.0387121	0.170116	Upregulated	SA-E vs SA
TRINITY_DN1652_c0_g2_i1	245	38	0.373527	0.0886644	Nonsignificant	SA-E vs SA
TRINITY_DN1653_c0_g2_i2	19.84	8.3	0.0452806	0.872045	Upregulated	SA-E vs SA
TRINITY_DN1659_c0_g1_i1	76	26	0.00139668	0.713201	Upregulated	SA-E vs SA
TRINITY_DN166_c0_g1_i10	292	45	0.360483	0.0835963	Nonsignificant	SA-E vs SA
TRINITY_DN166_c0_g1_i13	672.86	97.67	0.396893	0.0363424	Nonsignificant	SA-E vs SA
TRINITY_DN166_c0_g1_i7	247.29	4.58	2.41789e-06	-1.58921	Downregulated	SA-E vs SA
TRINITY_DN166_c0_g1_i8	561.86	44.75	0.0367324	-0.437541	Downregulated	SA-E vs SA
TRINITY_DN166_c1_g2_i1	485	44	0.148876	-0.334744	Nonsignificant	SA-E vs SA
TRINITY_DN16616_c0_g1_i2	228.47	3.97	2.73538e-06	-1.63956	Downregulated	SA-E vs SA
TRINITY_DN16616_c0_g1_i3	163.53	31.03	0.12729	0.247855	Nonsignificant	SA-E vs SA
TRINITY_DN16616_c0_g1_i6	299	47	0.304174	0.099225	Nonsignificant	SA-E vs SA
TRINITY_DN1663_c0_g1_i1	24	65	4.7856e-28	2.34669	Upregulated	SA-E vs SA
TRINITY_DN1664_c0_g1_i1	101	11	0.835873	-0.190472	Nonsignificant	SA-E vs SA
TRINITY_DN1664_c0_g2_i1	643	89	0.58303	-0.00121138	Nonsignificant	SA-E vs SA
TRINITY_DN1668_c0_g2_i1	391	39	0.361142	-0.259887	Nonsignificant	SA-E vs SA
TRINITY_DN1668_c1_g1_i1	58	7	1	-0.109395	Nonsignificant	SA-E vs SA
TRINITY_DN167_c0_g1_i1	621	68	0.520839	-0.186207	Nonsignificant	SA-E vs SA
TRINITY_DN167_c0_g2_i2	637.93	60.85	0.190174	-0.295155	Nonsignificant	SA-E vs SA
TRINITY_DN167_c0_g2_i3	230.07	2.15	3.76962e-08	-2.12928	Downregulated	SA-E vs SA
TRINITY_DN1677_c0_g1_i1	60	6	0.770192	-0.257865	Nonsignificant	SA-E vs SA
TRINITY_DN1677_c0_g2_i1	17	6	0.11103	0.73782	Nonsignificant	SA-E vs SA
TRINITY_DN1680_c0_g1_i1	212	43	0.0414011	0.300481	Upregulated	SA-E vs SA
TRINITY_DN1682_c0_g1_i1	42	7	0.623404	0.145441	Nonsignificant	SA-E vs SA
TRINITY_DN1683_c0_g1_i1	33	5	0.847719	0.0701917	Nonsignificant	SA-E vs SA
TRINITY_DN1685_c0_g1_i1	134	8	0.0667299	-0.665109	Nonsignificant	SA-E vs SA
TRINITY_DN1687_c0_g1_i1	318	46	0.511506	0.0336051	Nonsignificant	SA-E vs SA
TRINITY_DN1687_c1_g1_i1	130	54	4.07603e-07	0.866435	Upregulated	SA-E vs SA
TRINITY_DN16956_c0_g2_i1	143	12	0.254864	-0.396309	Nonsignificant	SA-E vs SA
TRINITY_DN17_c0_g1_i2	62	55	3.08701e-14	1.46548	Upregulated	SA-E vs SA
TRINITY_DN17_c0_g2_i3	433	13	5.7584e-07	-1.20782	Downregulated	SA-E vs SA
TRINITY_DN170_c1_g1_i1	81359.9	18665.8	1.91368e-05	0.397748	Upregulated	SA-E vs SA
TRINITY_DN170_c1_g1_i2	801.1	103.17	0.865181	-0.0581351	Nonsignificant	SA-E vs SA
TRINITY_DN1707_c0_g1_i1	149	6	0.00788991	-0.976012	Downregulated	SA-E vs SA
TRINITY_DN171_c0_g1_i1	3420	438	0.856393	-0.0625321	Nonsignificant	SA-E vs SA
TRINITY_DN171_c0_g2_i1	88	14	0.526363	0.108712	Nonsignificant	SA-E vs SA
TRINITY_DN17111_c0_g1_i1	461	27	0.00178748	-0.680238	Downregulated	SA-E vs SA
TRINITY_DN17111_c0_g2_i1	332	12	3.4228e-05	-1.06131	Downregulated	SA-E vs SA
TRINITY_DN1712_c0_g1_i1	240	47	0.0486678	0.272765	Upregulated	SA-E vs SA
TRINITY_DN17139_c0_g2_i1	228	41	0.125108	0.205433	Nonsignificant	SA-E vs SA
TRINITY_DN17139_c0_g3_i1	1716	252	0.295967	0.0455171	Nonsignificant	SA-E vs SA
TRINITY_DN17139_c0_g3_i3	592	23	1.36708e-06	-1.0043	Downregulated	SA-E vs SA
TRINITY_DN17139_c1_g1_i1	107	16	0.637132	0.0597933	Nonsignificant	SA-E vs SA
TRINITY_DN17139_c1_g2_i1	475.51	96.28	0.0103685	0.299106	Upregulated	SA-E vs SA
TRINITY_DN17139_c1_g2_i3	549.1	106.72	0.0144448	0.26678	Upregulated	SA-E vs SA
TRINITY_DN17150_c0_g1_i3	208.28	68	6.30811e-06	0.676299	Upregulated	SA-E vs SA
TRINITY_DN17150_c1_g1_i1	55.75	17.41	0.0181302	0.6412	Upregulated	SA-E vs SA
TRINITY_DN17150_c1_g1_i4	163.25	34.59	0.034997	0.334957	Upregulated	SA-E vs SA
TRINITY_DN17198_c0_g1_i1	292	3	4.52997e-09	-2.05446	Downregulated	SA-E vs SA
TRINITY_DN172_c0_g1_i7	329.33	9	2.81452e-06	-1.28207	Downregulated	SA-E vs SA
TRINITY_DN1721_c0_g1_i1	1122.79	154	0.570938	-0.00840466	Nonsignificant	SA-E vs SA
TRINITY_DN1721_c0_g2_i1	2091	188	0.0442854	-0.341847	Downregulated	SA-E vs SA
TRINITY_DN1723_c0_g1_i1	45	9	0.36518	0.289387	Nonsignificant	SA-E vs SA
TRINITY_DN17292_c0_g1_i1	147	11	0.188555	-0.486787	Nonsignificant	SA-E vs SA
TRINITY_DN17322_c0_g1_i1	199	9	0.00498626	-0.884343	Downregulated	SA-E vs SA
TRINITY_DN1733_c0_g1_i2	172	14	0.211414	-0.420389	Nonsignificant	SA-E vs SA
TRINITY_DN1735_c0_g1_i1	3612	373	0.219689	-0.232485	Nonsignificant	SA-E vs SA
TRINITY_DN1743_c0_g2_i1	1471	161	0.438886	-0.186578	Nonsignificant	SA-E vs SA
TRINITY_DN1745_c0_g1_i3	1313.55	148.12	0.555585	-0.163029	Nonsignificant	SA-E vs SA
TRINITY_DN1745_c0_g1_i4	863.16	38.15	7.23193e-07	-0.902498	Downregulated	SA-E vs SA
TRINITY_DN1745_c0_g1_i5	45.29	1.73	0.195373	-1.01768	Nonsignificant	SA-E vs SA
TRINITY_DN1745_c0_g1_i6	238	63	0.000437539	0.51069	Upregulated	SA-E vs SA
TRINITY_DN1745_c0_g2_i1	130	38	0.00104733	0.589	Upregulated	SA-E vs SA
TRINITY_DN1746_c0_g1_i1	64	3	0.129425	-0.856071	Nonsignificant	SA-E vs SA
TRINITY_DN1750_c0_g1_i3	340	40	0.859756	-0.129554	Nonsignificant	SA-E vs SA
TRINITY_DN1750_c0_g2_i1	73.23	21.92	0.00657299	0.607746	Upregulated	SA-E vs SA
TRINITY_DN1750_c0_g2_i2	628.77	57.08	0.11448	-0.334233	Nonsignificant	SA-E vs SA
TRINITY_DN1752_c0_g2_i1	58	4	0.349715	-0.551221	Nonsignificant	SA-E vs SA
TRINITY_DN1754_c0_g1_i1	445	9	3.12397e-09	-1.51972	Downregulated	SA-E vs SA
TRINITY_DN1754_c0_g2_i1	241	38	0.344091	0.101661	Nonsignificant	SA-E vs SA
TRINITY_DN1760_c0_g1_i2	480.42	53.84	0.65741	-0.167907	Nonsignificant	SA-E vs SA
TRINITY_DN1760_c0_g1_i6	540.71	267.9	9.86537e-17	1.00561	Upregulated	SA-E vs SA
TRINITY_DN1760_c0_g2_i1	99	10	0.667032	-0.24993	Nonsignificant	SA-E vs SA
TRINITY_DN1760_c0_g3_i1	133	12	0.417355	-0.339073	Nonsignificant	SA-E vs SA
TRINITY_DN1760_c0_g4_i1	178	10	0.0284866	-0.713111	Downregulated	SA-E vs SA
TRINITY_DN17610_c0_g1_i3	353.85	20.23	0.00263336	-0.699301	Downregulated	SA-E vs SA
TRINITY_DN17610_c0_g1_i6	186.48	6.78	0.00149312	-1.05667	Downregulated	SA-E vs SA
TRINITY_DN17610_c0_g1_i7	4733.67	430.99	0.0376782	-0.331911	Downregulated	SA-E vs SA
TRINITY_DN17610_c0_g2_i1	26	11	0.0173117	0.880922	Upregulated	SA-E vs SA
TRINITY_DN17610_c1_g1_i1	46	30	2.71595e-07	1.22259	Upregulated	SA-E vs SA
TRINITY_DN17610_c2_g1_i1	19	4	0.472	0.329884	Nonsignificant	SA-E vs SA
TRINITY_DN1763_c1_g1_i1	442	49	0.60861	-0.176469	Nonsignificant	SA-E vs SA
TRINITY_DN17707_c0_g1_i1	68	9	1	-0.0365618	Nonsignificant	SA-E vs SA
TRINITY_DN17711_c0_g1_i1	19	3	1	0.102754	Nonsignificant	SA-E vs SA
TRINITY_DN17733_c0_g1_i1	506	27	0.00030625	-0.753773	Downregulated	SA-E vs SA
TRINITY_DN1775_c0_g1_i1	2030.21	238	0.71168	-0.132362	Nonsignificant	SA-E vs SA
TRINITY_DN1775_c0_g1_i6	558	36	0.00302174	-0.603875	Downregulated	SA-E vs SA
TRINITY_DN1775_c0_g3_i1	303	30	0.391948	-0.265721	Nonsignificant	SA-E vs SA
TRINITY_DN1775_c0_g4_i1	160	24	0.566367	0.0622567	Nonsignificant	SA-E vs SA
TRINITY_DN1776_c0_g1_i1	22	13	0.00124544	1.14471	Upregulated	SA-E vs SA
TRINITY_DN179_c0_g1_i6	86	10	1	-0.138788	Nonsignificant	SA-E vs SA
TRINITY_DN1792_c0_g1_i1	88	17	0.228883	0.262002	Nonsignificant	SA-E vs SA
TRINITY_DN1798_c0_g1_i2	136	15	0.796102	-0.180508	Nonsignificant	SA-E vs SA
TRINITY_DN1799_c1_g1_i1	3421.1	423	0.967277	-0.0902981	Nonsignificant	SA-E vs SA
TRINITY_DN1799_c1_g1_i4	244.27	32	0.869193	-0.0446584	Nonsignificant	SA-E vs SA
TRINITY_DN1799_c2_g1_i1	18.35	5.35	0.352234	0.58696	Nonsignificant	SA-E vs SA
TRINITY_DN1799_c2_g1_i2	438.65	42.65	0.286753	-0.280042	Nonsignificant	SA-E vs SA
TRINITY_DN1799_c2_g2_i1	2548	264	0.238939	-0.229861	Nonsignificant	SA-E vs SA
TRINITY_DN180_c0_g1_i1	7977	805	0.15173	-0.250673	Nonsignificant	SA-E vs SA
TRINITY_DN180_c0_g2_i1	445	25	0.00104087	-0.713111	Downregulated	SA-E vs SA
TRINITY_DN180_c0_g3_i1	482	89	0.0396521	0.226328	Upregulated	SA-E vs SA
TRINITY_DN180_c0_g4_i1	3844	211	2.36081e-07	-0.731438	Downregulated	SA-E vs SA
TRINITY_DN1801_c0_g1_i1	16278	1600	0.10085	-0.271465	Nonsignificant	SA-E vs SA
TRINITY_DN1801_c1_g1_i1	318	69	0.00690111	0.353727	Upregulated	SA-E vs SA
TRINITY_DN1801_c2_g1_i1	44	5	1	-0.156938	Nonsignificant	SA-E vs SA
TRINITY_DN1801_c2_g2_i1	549	21	1.71815e-06	-1.01658	Downregulated	SA-E vs SA
TRINITY_DN1802_c1_g1_i1	963.85	97.56	0.262121	-0.248299	Nonsignificant	SA-E vs SA
TRINITY_DN1802_c1_g1_i2	82.15	15.44	0.290235	0.24032	Nonsignificant	SA-E vs SA
TRINITY_DN1802_c2_g1_i1	43	12	0.0663279	0.55241	Nonsignificant	SA-E vs SA
TRINITY_DN1802_c2_g2_i1	23	6	0.211789	0.499164	Nonsignificant	SA-E vs SA
TRINITY_DN18037_c0_g2_i1	165	37	0.0202481	0.379716	Upregulated	SA-E vs SA
TRINITY_DN1805_c0_g1_i1	865	122	0.479345	0.0136315	Nonsignificant	SA-E vs SA
TRINITY_DN1805_c0_g2_i1	94	7	0.298038	-0.490614	Nonsignificant	SA-E vs SA
TRINITY_DN1805_c1_g1_i1	179	18	0.511556	-0.253467	Nonsignificant	SA-E vs SA
TRINITY_DN1805_c2_g1_i1	26	7	0.175453	0.524072	Nonsignificant	SA-E vs SA
TRINITY_DN18112_c0_g1_i1	92	22	0.0339705	0.430467	Upregulated	SA-E vs SA
TRINITY_DN1837_c0_g1_i1	515.16	123	0.000311887	0.429246	Upregulated	SA-E vs SA
TRINITY_DN1837_c0_g2_i1	2756.54	760.21	9.98204e-08	0.54306	Upregulated	SA-E vs SA
TRINITY_DN1837_c0_g2_i2	1779.76	132.79	0.00236796	-0.489099	Downregulated	SA-E vs SA
TRINITY_DN18372_c0_g2_i1	165	7	0.00599981	-0.934837	Downregulated	SA-E vs SA
TRINITY_DN184_c0_g1_i1	1104.18	124.48	0.556051	-0.163224	Nonsignificant	SA-E vs SA
TRINITY_DN184_c0_g1_i3	770.26	108.66	0.471619	0.0137926	Nonsignificant	SA-E vs SA
TRINITY_DN184_c1_g1_i1	17.05	10	0.00268218	1.13881	Upregulated	SA-E vs SA
TRINITY_DN184_c1_g1_i2	107.95	10	0.471942	-0.318262	Nonsignificant	SA-E vs SA
TRINITY_DN184_c1_g2_i1	74.74	1.75	0.0174197	-1.4041	Downregulated	SA-E vs SA
TRINITY_DN184_c1_g2_i3	259.26	21.9	0.178677	-0.391104	Nonsignificant	SA-E vs SA
TRINITY_DN184_c2_g1_i1	111	1	0.000148835	-2.15819	Downregulated	SA-E vs SA
TRINITY_DN1846_c0_g2_i1	1	24	8.24314e-11	4.06919	Upregulated	SA-E vs SA
TRINITY_DN18462_c0_g1_i1	197	36	0.129868	0.218135	Nonsignificant	SA-E vs SA
TRINITY_DN18467_c0_g1_i2	26.28	5	0.545091	0.249964	Nonsignificant	SA-E vs SA
TRINITY_DN18509_c0_g1_i1	22	3	1	-0.0129922	Nonsignificant	SA-E vs SA
TRINITY_DN1861_c0_g1_i1	147	21	0.644287	0.023736	Nonsignificant	SA-E vs SA
TRINITY_DN1867_c0_g2_i1	6925.34	1660	6.74368e-06	0.432343	Upregulated	SA-E vs SA
TRINITY_DN1867_c0_g3_i1	341	23	0.020148	-0.56878	Downregulated	SA-E vs SA
TRINITY_DN1867_c0_g4_i1	1135	218	0.00742698	0.257447	Upregulated	SA-E vs SA
TRINITY_DN1867_c1_g1_i1	70	8	0.897141	-0.15244	Nonsignificant	SA-E vs SA
TRINITY_DN187_c0_g1_i2	181.5	21	0.888581	-0.142713	Nonsignificant	SA-E vs SA
TRINITY_DN187_c1_g1_i2	2203.84	197.62	0.0418995	-0.343943	Downregulated	SA-E vs SA
TRINITY_DN187_c1_g1_i3	374.93	18.12	0.0004331	-0.831953	Downregulated	SA-E vs SA
TRINITY_DN187_c1_g1_i5	1261.17	393.62	3.77373e-09	0.640745	Upregulated	SA-E vs SA
TRINITY_DN187_c1_g1_i6	71.35	33.63	3.84165e-06	0.966208	Upregulated	SA-E vs SA
TRINITY_DN187_c1_g2_i1	119	53	1.36301e-07	0.921479	Upregulated	SA-E vs SA
TRINITY_DN18739_c0_g1_i1	23	5	0.523805	0.355218	Nonsignificant	SA-E vs SA
TRINITY_DN18739_c1_g1_i1	152	4	0.000588384	-1.31187	Downregulated	SA-E vs SA
TRINITY_DN1878_c0_g1_i1	44	8	0.533661	0.214138	Nonsignificant	SA-E vs SA
TRINITY_DN18789_c0_g1_i1	29	13	0.00401524	0.9266	Upregulated	SA-E vs SA
TRINITY_DN188_c0_g2_i2	208	58	0.000258671	0.551777	Upregulated	SA-E vs SA
TRINITY_DN1880_c0_g1_i1	1201	328	6.04015e-07	0.535354	Upregulated	SA-E vs SA
TRINITY_DN1883_c0_g1_i1	253	16	0.0232644	-0.619634	Downregulated	SA-E vs SA
TRINITY_DN1883_c0_g2_i1	258	14	0.00575734	-0.740511	Downregulated	SA-E vs SA
TRINITY_DN1886_c0_g1_i1	554	30	0.000307862	-0.742141	Downregulated	SA-E vs SA
TRINITY_DN1886_c1_g1_i1	163	35	0.034997	0.345471	Upregulated	SA-E vs SA
TRINITY_DN1886_c2_g1_i1	42	10	0.179719	0.427042	Nonsignificant	SA-E vs SA
TRINITY_DN1888_c0_g1_i2	13	4	0.282135	0.629497	Nonsignificant	SA-E vs SA
TRINITY_DN189_c0_g1_i1	122	4	0.00575891	-1.13829	Downregulated	SA-E vs SA
TRINITY_DN189_c0_g2_i1	211.58	53	0.00206414	0.467128	Upregulated	SA-E vs SA
TRINITY_DN189_c0_g3_i1	394	33	0.100623	-0.397814	Nonsignificant	SA-E vs SA
TRINITY_DN189_c0_g4_i1	679	87	0.883111	-0.0621658	Nonsignificant	SA-E vs SA
TRINITY_DN18952_c0_g1_i1	140	15	0.671057	-0.203394	Nonsignificant	SA-E vs SA
TRINITY_DN18952_c1_g1_i1	19	21	4.82185e-08	1.63908	Upregulated	SA-E vs SA
TRINITY_DN19_c9_g1_i1	2268	137	1.37298e-05	-0.655851	Downregulated	SA-E vs SA
TRINITY_DN190_c0_g1_i1	43	17	0.00297647	0.827404	Upregulated	SA-E vs SA
TRINITY_DN190_c0_g2_i1	28	6	0.335094	0.343858	Nonsignificant	SA-E vs SA
TRINITY_DN190_c0_g3_i1	200	36	0.147201	0.206203	Nonsignificant	SA-E vs SA
TRINITY_DN1906_c1_g1_i1	54	7	1	-0.0529764	Nonsignificant	SA-E vs SA
TRINITY_DN1906_c2_g2_i2	689.38	63	0.116471	-0.328979	Nonsignificant	SA-E vs SA
TRINITY_DN191_c0_g1_i1	191	7	0.000955102	-1.05037	Downregulated	SA-E vs SA
TRINITY_DN191_c0_g2_i1	26393	6935	2.09472e-07	0.504862	Upregulated	SA-E vs SA
TRINITY_DN1914_c0_g1_i2	519	81	0.240243	0.0935731	Nonsignificant	SA-E vs SA
TRINITY_DN1914_c0_g1_i5	212	20	0.35694	-0.303869	Nonsignificant	SA-E vs SA
TRINITY_DN192_c0_g1_i19	573.05	84.04	0.403469	0.044445	Nonsignificant	SA-E vs SA
TRINITY_DN192_c0_g1_i2	296.37	50.1	0.171186	0.15663	Nonsignificant	SA-E vs SA
TRINITY_DN192_c0_g1_i5	49.63	3.9	0.504731	-0.448165	Nonsignificant	SA-E vs SA
TRINITY_DN192_c0_g1_i6	684.95	29.96	3.31582e-06	-0.910715	Downregulated	SA-E vs SA
TRINITY_DN1922_c0_g2_i1	2469.87	297.21	0.827241	-0.111723	Nonsignificant	SA-E vs SA
TRINITY_DN1922_c0_g2_i3	132.29	21.82	0.33681	0.137222	Nonsignificant	SA-E vs SA
TRINITY_DN1922_c0_g2_i4	292.84	14.97	0.00256355	-0.787626	Downregulated	SA-E vs SA
TRINITY_DN1922_c0_g3_i1	482	36	0.0244137	-0.488278	Downregulated	SA-E vs SA
TRINITY_DN1922_c0_g4_i1	3333	512	0.162389	0.0810602	Nonsignificant	SA-E vs SA
TRINITY_DN1922_c1_g1_i1	249	50	0.0363184	0.292551	Upregulated	SA-E vs SA
TRINITY_DN1926_c1_g1_i2	347.21	39	0.691873	-0.16611	Nonsignificant	SA-E vs SA
TRINITY_DN1929_c0_g1_i1	146	31	0.0442535	0.336614	Upregulated	SA-E vs SA
TRINITY_DN193_c0_g1_i1	1202.84	103.7	0.0379448	-0.374993	Downregulated	SA-E vs SA
TRINITY_DN193_c0_g1_i13	959.68	129.65	0.63253	-0.0203596	Nonsignificant	SA-E vs SA
TRINITY_DN193_c0_g1_i21	52.19	69.4	3.83985e-21	1.78508	Upregulated	SA-E vs SA
TRINITY_DN193_c0_g1_i4	304.78	84.69	4.25206e-05	0.549016	Upregulated	SA-E vs SA
TRINITY_DN193_c0_g1_i5	83.04	9.41	0.906204	-0.159147	Nonsignificant	SA-E vs SA
TRINITY_DN193_c0_g1_i8	1163.87	115.65	0.202004	-0.262881	Nonsignificant	SA-E vs SA
TRINITY_DN193_c0_g1_i9	3548.15	106.42	5.18098e-17	-1.2086	Downregulated	SA-E vs SA
TRINITY_DN193_c0_g2_i1	103.38	23.78	0.0385652	0.399818	Upregulated	SA-E vs SA
TRINITY_DN193_c0_g2_i2	275.62	20.22	0.0490724	-0.502431	Downregulated	SA-E vs SA
TRINITY_DN193_c3_g1_i1	36	4	1	-0.174681	Nonsignificant	SA-E vs SA
TRINITY_DN1932_c0_g1_i3	1911	206	0.37176	-0.198589	Nonsignificant	SA-E vs SA
TRINITY_DN1932_c0_g2_i1	252	19	0.0752286	-0.480829	Nonsignificant	SA-E vs SA
TRINITY_DN1933_c0_g1_i1	439	64	0.458284	0.0397583	Nonsignificant	SA-E vs SA
TRINITY_DN1933_c0_g2_i2	231	5	1.08685e-05	-1.46614	Downregulated	SA-E vs SA
TRINITY_DN1933_c1_g1_i1	137.78	7	0.0259642	-0.792497	Downregulated	SA-E vs SA
TRINITY_DN19354_c0_g1_i1	13	16	1.27658e-06	1.724	Upregulated	SA-E vs SA
TRINITY_DN19354_c1_g1_i1	25	2	0.81105	-0.434041	Nonsignificant	SA-E vs SA
TRINITY_DN194_c1_g1_i1	25	4	0.832022	0.113211	Nonsignificant	SA-E vs SA
TRINITY_DN194_c1_g2_i5	17	1	0.759851	-0.676805	Nonsignificant	SA-E vs SA
TRINITY_DN1947_c0_g1_i1	19	4	0.472	0.329884	Nonsignificant	SA-E vs SA
TRINITY_DN1948_c0_g1_i1	2.53	17	3.94049e-08	3.06409	Upregulated	SA-E vs SA
TRINITY_DN195_c0_g1_i2	480	25	0.000365564	-0.772887	Downregulated	SA-E vs SA
TRINITY_DN195_c0_g2_i1	275	14	0.00240773	-0.790891	Downregulated	SA-E vs SA
TRINITY_DN1956_c0_g1_i1	51	2	0.109021	-0.996927	Nonsignificant	SA-E vs SA
TRINITY_DN1956_c0_g2_i1	329	10	6.41991e-06	-1.19809	Downregulated	SA-E vs SA
TRINITY_DN1956_c0_g4_i1	238	36	0.451174	0.0688635	Nonsignificant	SA-E vs SA
TRINITY_DN1956_c0_g5_i1	51	4	0.504731	-0.449675	Nonsignificant	SA-E vs SA
TRINITY_DN19691_c1_g1_i1	121	13	0.780638	-0.201222	Nonsignificant	SA-E vs SA
TRINITY_DN1980_c0_g1_i1	9	23	1.63617e-11	2.30085	Upregulated	SA-E vs SA
TRINITY_DN1982_c0_g1_i1	274	16	0.00922011	-0.682589	Downregulated	SA-E vs SA
TRINITY_DN19847_c0_g1_i1	76	24	0.00371809	0.650005	Upregulated	SA-E vs SA
TRINITY_DN1988_c0_g1_i1	1918	210	0.428387	-0.186292	Nonsignificant	SA-E vs SA
TRINITY_DN1988_c1_g1_i1	814	36	1.15699e-06	-0.901998	Downregulated	SA-E vs SA
TRINITY_DN1989_c0_g1_i1	245	39	0.323614	0.109172	Nonsignificant	SA-E vs SA
TRINITY_DN1990_c0_g1_i1	28.95	18.01	8.39027e-05	1.18533	Upregulated	SA-E vs SA
TRINITY_DN1990_c0_g1_i2	2517.01	160.11	3.731e-05	-0.615028	Downregulated	SA-E vs SA
TRINITY_DN1990_c0_g1_i3	2240.73	343.66	0.175887	0.0797964	Nonsignificant	SA-E vs SA
TRINITY_DN1990_c0_g1_i5	10306.5	1020.06	0.114685	-0.266018	Nonsignificant	SA-E vs SA
TRINITY_DN1990_c0_g1_i7	2.87978e+06	46693.2	8.24335e-41	-1.69422	Downregulated	SA-E vs SA
TRINITY_DN1990_c0_g2_i1	86	1	0.00127928	-1.95672	Downregulated	SA-E vs SA
TRINITY_DN1993_c0_g1_i1	318	28	0.176493	-0.358341	Nonsignificant	SA-E vs SA
TRINITY_DN1995_c0_g1_i1	107	20	0.209717	0.235969	Nonsignificant	SA-E vs SA
TRINITY_DN1995_c1_g1_i1	48	15	0.0197076	0.641738	Upregulated	SA-E vs SA
TRINITY_DN1996_c0_g1_i3	22.44	31.49	6.60497e-12	1.82757	Upregulated	SA-E vs SA
TRINITY_DN1996_c0_g1_i5	28.56	12.51	0.00401524	0.908336	Upregulated	SA-E vs SA
TRINITY_DN1996_c1_g1_i2	53	32	2.00478e-07	1.16171	Upregulated	SA-E vs SA
TRINITY_DN1998_c0_g1_i1	219	11	0.00582604	-0.80152	Downregulated	SA-E vs SA
TRINITY_DN2_c0_g1_i1	6185.57	571.67	0.0450852	-0.320101	Downregulated	SA-E vs SA
TRINITY_DN2_c0_g3_i1	75	15	0.186636	0.289387	Nonsignificant	SA-E vs SA
TRINITY_DN2_c0_g4_i1	2205	237	0.353295	-0.200892	Nonsignificant	SA-E vs SA
TRINITY_DN2_c0_g5_i1	41615.4	2644.33	3.04553e-06	-0.615886	Downregulated	SA-E vs SA
TRINITY_DN2_c1_g1_i1	170	12	0.089536	-0.532859	Nonsignificant	SA-E vs SA
TRINITY_DN2_c2_g1_i1	105	9	0.397923	-0.37957	Nonsignificant	SA-E vs SA
TRINITY_DN20045_c0_g2_i1	317	49	0.323058	0.0859726	Nonsignificant	SA-E vs SA
TRINITY_DN2007_c0_g1_i1	193	18	0.359156	-0.312921	Nonsignificant	SA-E vs SA
TRINITY_DN2007_c0_g2_i1	916	82	0.074715	-0.345274	Nonsignificant	SA-E vs SA
TRINITY_DN2007_c1_g1_i1	155	16	0.631477	-0.232799	Nonsignificant	SA-E vs SA
TRINITY_DN2007_c2_g1_i1	217	27	1	-0.0853361	Nonsignificant	SA-E vs SA
TRINITY_DN2008_c0_g1_i1	147	28	0.133213	0.250866	Nonsignificant	SA-E vs SA
TRINITY_DN2008_c0_g1_i3	206	19	0.310884	-0.321699	Nonsignificant	SA-E vs SA
TRINITY_DN2009_c2_g1_i2	26	11	0.0173117	0.880922	Upregulated	SA-E vs SA
TRINITY_DN201_c0_g2_i2	232.48	20	0.205584	-0.376677	Nonsignificant	SA-E vs SA
TRINITY_DN201_c0_g3_i1	152	13	0.275273	-0.381303	Nonsignificant	SA-E vs SA
TRINITY_DN201_c0_g4_i1	2227.67	199	0.038633	-0.34694	Downregulated	SA-E vs SA
TRINITY_DN201_c1_g1_i1	159	31	0.0937126	0.269271	Nonsignificant	SA-E vs SA
TRINITY_DN2010_c0_g1_i1	149	45	0.000258465	0.61479	Upregulated	SA-E vs SA
TRINITY_DN2019_c0_g1_i2	43	22	7.67142e-05	1.03096	Upregulated	SA-E vs SA
TRINITY_DN2020_c0_g1_i3	17	1	0.759851	-0.676805	Nonsignificant	SA-E vs SA
TRINITY_DN2020_c2_g1_i1	59	14	0.0857668	0.424361	Nonsignificant	SA-E vs SA
TRINITY_DN2025_c0_g1_i1	148	27	0.195977	0.2168	Nonsignificant	SA-E vs SA
TRINITY_DN2025_c0_g2_i1	50230	5603	0.439049	-0.171591	Nonsignificant	SA-E vs SA
TRINITY_DN2025_c1_g2_i1	159	20	1	-0.0767394	Nonsignificant	SA-E vs SA
TRINITY_DN2027_c0_g1_i2	16.51	20	1.27111e-07	1.71147	Upregulated	SA-E vs SA
TRINITY_DN203_c0_g2_i2	542.1	42.79	0.0363682	-0.444634	Downregulated	SA-E vs SA
TRINITY_DN203_c0_g2_i3	73.9	71.21	1.38722e-17	1.53079	Upregulated	SA-E vs SA
TRINITY_DN203_c0_g3_i1	554	41	0.0163921	-0.495516	Downregulated	SA-E vs SA
TRINITY_DN20336_c0_g1_i1	201.34	9.02	0.00410751	-0.89182	Downregulated	SA-E vs SA
TRINITY_DN20336_c0_g1_i3	12.66	16.98	4.53154e-07	1.79186	Upregulated	SA-E vs SA
TRINITY_DN2042_c0_g1_i2	1370.35	30.75	6.02637e-16	-1.43768	Downregulated	SA-E vs SA
TRINITY_DN2042_c0_g1_i3	1316.65	311.25	4.81269e-05	0.421385	Upregulated	SA-E vs SA
TRINITY_DN2042_c0_g2_i1	220	5	1.77254e-05	-1.42762	Downregulated	SA-E vs SA
TRINITY_DN2042_c0_g3_i1	3540	298	0.0112338	-0.393823	Downregulated	SA-E vs SA
TRINITY_DN2042_c1_g1_i2	1463.04	282.64	0.0052995	0.262022	Upregulated	SA-E vs SA
TRINITY_DN2042_c1_g1_i3	1775.32	6.36	2.28535e-38	-2.88627	Downregulated	SA-E vs SA
TRINITY_DN2044_c0_g1_i1	214	20	0.326022	-0.311283	Nonsignificant	SA-E vs SA
TRINITY_DN2045_c0_g1_i1	147	13	0.349508	-0.354895	Nonsignificant	SA-E vs SA
TRINITY_DN2045_c0_g2_i1	2595	104	3.37981e-11	-0.979773	Downregulated	SA-E vs SA
TRINITY_DN2045_c1_g1_i1	253	19	0.0874497	-0.483956	Nonsignificant	SA-E vs SA
TRINITY_DN205_c0_g3_i1	21	2	1	-0.296386	Nonsignificant	SA-E vs SA
TRINITY_DN2056_c0_g1_i1	779	94	0.876107	-0.109539	Nonsignificant	SA-E vs SA
TRINITY_DN2069_c0_g1_i1	75.74	14	0.317984	0.227164	Nonsignificant	SA-E vs SA
TRINITY_DN2069_c0_g1_i2	3455.8	521	0.202986	0.0662522	Nonsignificant	SA-E vs SA
TRINITY_DN2069_c0_g2_i1	95	7	0.298038	-0.498969	Nonsignificant	SA-E vs SA
TRINITY_DN2087_c0_g1_i9	471.47	18	5.38272e-06	-1.01809	Downregulated	SA-E vs SA
TRINITY_DN2087_c0_g2_i1	184	21	0.834447	-0.153513	Nonsignificant	SA-E vs SA
TRINITY_DN2087_c0_g3_i1	32	4	1	-0.0816892	Nonsignificant	SA-E vs SA
TRINITY_DN2098_c0_g1_i2	436.74	50	0.714595	-0.151067	Nonsignificant	SA-E vs SA
TRINITY_DN2098_c0_g1_i4	4924.6	635	0.817137	-0.0571605	Nonsignificant	SA-E vs SA
TRINITY_DN21_c0_g1_i1	462	64	0.598676	-0.000558799	Nonsignificant	SA-E vs SA
TRINITY_DN21_c0_g1_i6	2033	205	0.190436	-0.251291	Nonsignificant	SA-E vs SA
TRINITY_DN21_c0_g1_i8	890.34	99	0.540025	-0.174096	Nonsignificant	SA-E vs SA
TRINITY_DN21_c0_g2_i1	126	2	0.000219377	-1.71101	Downregulated	SA-E vs SA
TRINITY_DN210_c0_g1_i2	674	26	3.69757e-07	-1.00992	Downregulated	SA-E vs SA
TRINITY_DN210_c0_g2_i1	512	47	0.158808	-0.325441	Nonsignificant	SA-E vs SA
TRINITY_DN211_c0_g1_i2	19	14	0.000200837	1.31896	Upregulated	SA-E vs SA
TRINITY_DN211_c0_g1_i3	466	22	0.000103428	-0.850444	Downregulated	SA-E vs SA
TRINITY_DN211_c0_g2_i1	25	13	0.00190528	1.04378	Upregulated	SA-E vs SA
TRINITY_DN211_c0_g3_i1	108	2	0.0011366	-1.58931	Downregulated	SA-E vs SA
TRINITY_DN2114_c0_g1_i2	362	46	0.967229	-0.0687107	Nonsignificant	SA-E vs SA
TRINITY_DN21196_c0_g1_i1	15	30	2.7628e-13	2.10732	Upregulated	SA-E vs SA
TRINITY_DN21196_c0_g2_i1	298	113	3.88733e-09	0.794467	Upregulated	SA-E vs SA
TRINITY_DN212_c1_g1_i8	221	9	0.00142836	-0.967131	Downregulated	SA-E vs SA
TRINITY_DN212_c1_g1_i9	26	6	0.430494	0.402367	Nonsignificant	SA-E vs SA
TRINITY_DN212_c1_g2_i1	1007.03	5	1.15768e-25	-2.62858	Downregulated	SA-E vs SA
TRINITY_DN212_c1_g2_i4	15.17	5	0.227948	0.683795	Nonsignificant	SA-E vs SA
TRINITY_DN21202_c0_g1_i1	65	11	0.453801	0.157495	Nonsignificant	SA-E vs SA
TRINITY_DN2132_c0_g2_i2	842.53	183.14	0.000835427	0.355137	Upregulated	SA-E vs SA
TRINITY_DN2132_c0_g2_i3	1568.12	53.86	1.58452e-11	-1.10159	Downregulated	SA-E vs SA
TRINITY_DN2132_c0_g4_i3	114	1.72	0.000793692	-1.75107	Downregulated	SA-E vs SA
TRINITY_DN2132_c0_g6_i1	1192	145	0.903048	-0.103174	Nonsignificant	SA-E vs SA
TRINITY_DN2132_c0_g7_i1	2748	341	0.98767	-0.0874566	Nonsignificant	SA-E vs SA
TRINITY_DN2132_c1_g1_i1	173	9	0.0186462	-0.773801	Downregulated	SA-E vs SA
TRINITY_DN21343_c0_g1_i2	137	25	0.197897	0.217014	Nonsignificant	SA-E vs SA
TRINITY_DN2142_c0_g1_i1	61	5	0.457819	-0.414861	Nonsignificant	SA-E vs SA
TRINITY_DN2142_c0_g2_i1	51	20	0.00104138	0.821004	Upregulated	SA-E vs SA
TRINITY_DN2142_c1_g1_i1	177	14	0.164738	-0.443013	Nonsignificant	SA-E vs SA
TRINITY_DN2145_c0_g1_i1	51	24	8.41695e-05	0.96495	Upregulated	SA-E vs SA
TRINITY_DN2147_c0_g2_i1	40	2	0.235318	-0.805117	Nonsignificant	SA-E vs SA
TRINITY_DN2147_c0_g2_i2	346.44	125.45	7.10591e-09	0.758072	Upregulated	SA-E vs SA
TRINITY_DN2147_c0_g2_i4	509.12	79.55	0.234371	0.0944863	Nonsignificant	SA-E vs SA
TRINITY_DN2147_c0_g3_i1	106	29	0.00482304	0.536738	Upregulated	SA-E vs SA
TRINITY_DN2147_c1_g1_i1	111	3	0.00432459	-1.29082	Downregulated	SA-E vs SA
TRINITY_DN215_c0_g1_i3	29	2	0.499675	-0.551221	Nonsignificant	SA-E vs SA
TRINITY_DN2150_c0_g2_i1	274	21	0.0743317	-0.467893	Nonsignificant	SA-E vs SA
TRINITY_DN2150_c1_g1_i1	111	1	0.000148835	-2.15819	Downregulated	SA-E vs SA
TRINITY_DN2150_c1_g3_i1	14388	1665	0.611049	-0.142583	Nonsignificant	SA-E vs SA
TRINITY_DN2153_c0_g1_i2	160	20	1	-0.0816894	Nonsignificant	SA-E vs SA
TRINITY_DN2153_c0_g2_i1	451	49	0.537275	-0.192384	Nonsignificant	SA-E vs SA
TRINITY_DN2158_c0_g1_i1	221	52	0.00486899	0.417698	Upregulated	SA-E vs SA
TRINITY_DN216_c0_g1_i10	18957	2763	0.272329	0.0395676	Nonsignificant	SA-E vs SA
TRINITY_DN216_c0_g1_i4	3403.41	8	1.43669e-55	-3.21896	Downregulated	SA-E vs SA
TRINITY_DN2163_c0_g1_i1	126	12	0.515533	-0.296386	Nonsignificant	SA-E vs SA
TRINITY_DN2173_c0_g1_i3	1167.51	390.37	3.21921e-10	0.695123	Upregulated	SA-E vs SA
TRINITY_DN2173_c0_g1_i6	3324.49	414.63	0.990693	-0.0834607	Nonsignificant	SA-E vs SA
TRINITY_DN2173_c0_g5_i1	230	9	0.000638974	-0.998645	Downregulated	SA-E vs SA
TRINITY_DN2186_c0_g1_i1	185	24	0.946227	-0.0523671	Nonsignificant	SA-E vs SA
TRINITY_DN21883_c0_g1_i1	77	15	0.230947	0.268609	Nonsignificant	SA-E vs SA
TRINITY_DN21883_c1_g1_i1	261	17	0.022783	-0.596349	Downregulated	SA-E vs SA
TRINITY_DN2189_c0_g1_i1	167	78	6.3882e-10	0.959018	Upregulated	SA-E vs SA
TRINITY_DN2190_c0_g1_i1	19	6	0.186747	0.650006	Nonsignificant	SA-E vs SA
TRINITY_DN220_c0_g1_i1	154	16	0.631477	-0.227689	Nonsignificant	SA-E vs SA
TRINITY_DN2202_c0_g1_i4	825.38	89	0.453608	-0.198353	Nonsignificant	SA-E vs SA
TRINITY_DN2204_c0_g1_i1	90	11	1	-0.0994321	Nonsignificant	SA-E vs SA
TRINITY_DN2204_c0_g2_i1	407	19	0.000161883	-0.859311	Downregulated	SA-E vs SA
TRINITY_DN221_c0_g1_i1	74.68	11.95	0.563865	0.11329	Nonsignificant	SA-E vs SA
TRINITY_DN221_c0_g1_i10	29.65	16	0.00040416	1.07303	Upregulated	SA-E vs SA
TRINITY_DN221_c0_g1_i4	2171.32	169.05	0.00401801	-0.45549	Downregulated	SA-E vs SA
TRINITY_DN221_c0_g1_i8	26	8	0.094398	0.629497	Nonsignificant	SA-E vs SA
TRINITY_DN221_c1_g1_i1	70	11	0.62586	0.0989851	Nonsignificant	SA-E vs SA
TRINITY_DN2213_c0_g1_i1	160	8	0.0170933	-0.805117	Downregulated	SA-E vs SA
TRINITY_DN22155_c0_g1_i1	197	21	0.636724	-0.207412	Nonsignificant	SA-E vs SA
TRINITY_DN22155_c1_g1_i1	119	24	0.103735	0.295994	Nonsignificant	SA-E vs SA
TRINITY_DN222_c0_g1_i5	16	70	5.55015e-29	2.72532	Upregulated	SA-E vs SA
TRINITY_DN222_c1_g2_i1	40	13	0.0211185	0.672704	Upregulated	SA-E vs SA
TRINITY_DN224_c0_g1_i1	733.23	87	0.813493	-0.122831	Nonsignificant	SA-E vs SA
TRINITY_DN2251_c0_g1_i3	38	2	0.311691	-0.76462	Nonsignificant	SA-E vs SA
TRINITY_DN2251_c0_g1_i5	283	35.47	1	-0.079572	Nonsignificant	SA-E vs SA
TRINITY_DN2251_c1_g1_i1	450	61	0.684498	-0.0176849	Nonsignificant	SA-E vs SA
TRINITY_DN2256_c0_g1_i1	732.27	61	0.041639	-0.402102	Downregulated	SA-E vs SA
TRINITY_DN2256_c0_g2_i1	259	39	0.41869	0.0652991	Nonsignificant	SA-E vs SA
TRINITY_DN22595_c0_g1_i1	18	2	1	-0.174681	Nonsignificant	SA-E vs SA
TRINITY_DN226_c0_g2_i5	110.68	4	0.0107729	-1.06141	Downregulated	SA-E vs SA
TRINITY_DN2262_c0_g1_i1	158	5	0.00139668	-1.16626	Downregulated	SA-E vs SA
TRINITY_DN2262_c0_g2_i1	134	10	0.162228	-0.488933	Nonsignificant	SA-E vs SA
TRINITY_DN22634_c0_g1_i1	81	12	0.654527	0.0524489	Nonsignificant	SA-E vs SA
TRINITY_DN227_c0_g1_i2	73	26	0.000896798	0.744998	Upregulated	SA-E vs SA
TRINITY_DN2270_c0_g1_i1	13104	1079	0.00446847	-0.411267	Downregulated	SA-E vs SA
TRINITY_DN228_c0_g1_i1	289	23	0.0996336	-0.438149	Nonsignificant	SA-E vs SA
TRINITY_DN229_c0_g2_i5	68	14	0.202826	0.312273	Nonsignificant	SA-E vs SA
TRINITY_DN229_c0_g2_i8	54	10	0.406933	0.228625	Nonsignificant	SA-E vs SA
TRINITY_DN2292_c0_g1_i1	311	69	0.00518841	0.3713	Upregulated	SA-E vs SA
TRINITY_DN230_c0_g4_i4	18253.5	596.76	7.47187e-19	-1.14056	Downregulated	SA-E vs SA
TRINITY_DN230_c0_g4_i5	4858.26	788.24	0.0728139	0.124223	Nonsignificant	SA-E vs SA
TRINITY_DN230_c0_g5_i1	55	20	0.00225486	0.76139	Upregulated	SA-E vs SA
TRINITY_DN230_c1_g1_i1	183	1	1.43189e-07	-2.55291	Downregulated	SA-E vs SA
TRINITY_DN2301_c0_g1_i1	26	5	0.545091	0.258421	Nonsignificant	SA-E vs SA
TRINITY_DN232_c0_g5_i2	24.87	1	0.439814	-0.977176	Nonsignificant	SA-E vs SA
TRINITY_DN2320_c0_g1_i1	109	52	3.89728e-08	0.975741	Upregulated	SA-E vs SA
TRINITY_DN2320_c0_g2_i1	314	27	0.140309	-0.377059	Nonsignificant	SA-E vs SA
TRINITY_DN23236_c0_g1_i1	5	21	4.26767e-10	2.69309	Upregulated	SA-E vs SA
TRINITY_DN2325_c0_g1_i1	446	79	0.067137	0.193513	Nonsignificant	SA-E vs SA
TRINITY_DN2325_c0_g2_i1	198	16	0.174589	-0.426106	Nonsignificant	SA-E vs SA
TRINITY_DN2331_c0_g1_i1	175	68	1.94613e-07	0.813752	Upregulated	SA-E vs SA
TRINITY_DN2331_c0_g1_i3	74	4	0.165414	-0.743565	Nonsignificant	SA-E vs SA
TRINITY_DN2339_c0_g1_i1	1721	120	0.000655122	-0.542553	Downregulated	SA-E vs SA
TRINITY_DN2339_c0_g2_i1	912	73	0.0192739	-0.433608	Downregulated	SA-E vs SA
TRINITY_DN234_c0_g1_i1	92.74	11	1	-0.12311	Nonsignificant	SA-E vs SA
TRINITY_DN234_c0_g2_i1	49	12	0.104469	0.449283	Nonsignificant	SA-E vs SA
TRINITY_DN2344_c0_g1_i2	160	8	0.0170933	-0.805117	Downregulated	SA-E vs SA
TRINITY_DN2344_c0_g2_i2	220.61	23.64	0.620217	-0.203287	Nonsignificant	SA-E vs SA
TRINITY_DN2344_c0_g2_i4	1005.55	97.36	0.153509	-0.283358	Nonsignificant	SA-E vs SA
TRINITY_DN2344_c0_g3_i1	1635	195	0.80005	-0.118763	Nonsignificant	SA-E vs SA
TRINITY_DN2344_c0_g4_i1	104	10	0.601004	-0.288831	Nonsignificant	SA-E vs SA
TRINITY_DN2344_c1_g1_i2	97	12	1	-0.089871	Nonsignificant	SA-E vs SA
TRINITY_DN2346_c0_g1_i1	733	88	0.869491	-0.11356	Nonsignificant	SA-E vs SA
TRINITY_DN2346_c0_g4_i1	79	6	0.305676	-0.475064	Nonsignificant	SA-E vs SA
TRINITY_DN2348_c0_g1_i2	36.53	17	0.00122165	0.956148	Upregulated	SA-E vs SA
TRINITY_DN2356_c0_g1_i1	258	36	0.640478	0.00515823	Nonsignificant	SA-E vs SA
TRINITY_DN2356_c0_g3_i2	1905.31	155	0.00996208	-0.420814	Downregulated	SA-E vs SA
TRINITY_DN2356_c0_g4_i1	99	3	0.00843262	-1.20049	Downregulated	SA-E vs SA
TRINITY_DN2357_c0_g2_i1	30	3	0.832022	-0.257865	Nonsignificant	SA-E vs SA
TRINITY_DN2357_c1_g1_i1	1599.71	193	0.8517	-0.109675	Nonsignificant	SA-E vs SA
TRINITY_DN2357_c1_g1_i3	346.7	38	0.625816	-0.185457	Nonsignificant	SA-E vs SA
TRINITY_DN2357_c1_g2_i1	347	24	0.022107	-0.548949	Downregulated	SA-E vs SA
TRINITY_DN2357_c2_g1_i1	245	38	0.373527	0.0886644	Nonsignificant	SA-E vs SA
TRINITY_DN236_c0_g1_i1	402.23	148.83	9.37794e-10	0.775113	Upregulated	SA-E vs SA
TRINITY_DN236_c0_g1_i3	225.5	0.87	4.35654e-09	-2.82774	Downregulated	SA-E vs SA
TRINITY_DN236_c0_g1_i5	1592.77	1.26	5.88161e-43	-4.07876	Downregulated	SA-E vs SA
TRINITY_DN236_c0_g1_i6	2835.81	216.48	0.00193751	-0.471035	Downregulated	SA-E vs SA
TRINITY_DN236_c0_g1_i7	1332.7	261.55	0.0041691	0.274466	Upregulated	SA-E vs SA
TRINITY_DN236_c0_g2_i2	56	11	0.293588	0.275161	Nonsignificant	SA-E vs SA
TRINITY_DN236_c1_g1_i2	543	60	0.55529	-0.179055	Nonsignificant	SA-E vs SA
TRINITY_DN236_c1_g2_i1	171	1	7.70411e-07	-2.49937	Downregulated	SA-E vs SA
TRINITY_DN2360_c1_g1_i3	96	23	0.0397958	0.431961	Upregulated	SA-E vs SA
TRINITY_DN2365_c0_g1_i1	503.19	36.09	0.013914	-0.520275	Downregulated	SA-E vs SA
TRINITY_DN2365_c0_g1_i2	50.81	15.91	0.0175335	0.643322	Upregulated	SA-E vs SA
TRINITY_DN2366_c0_g1_i1	52	6	1	-0.144884	Nonsignificant	SA-E vs SA
TRINITY_DN2368_c0_g1_i1	432	88	0.0102164	0.303874	Upregulated	SA-E vs SA
TRINITY_DN2368_c1_g1_i1	187.73	32.01	0.240637	0.163444	Nonsignificant	SA-E vs SA
TRINITY_DN2368_c1_g1_i2	1134.27	119.99	0.355741	-0.213456	Nonsignificant	SA-E vs SA
TRINITY_DN2368_c1_g2_i1	779	33	7.30971e-07	-0.935996	Downregulated	SA-E vs SA
TRINITY_DN237_c1_g1_i1	80.55	15.26	0.336846	0.246591	Nonsignificant	SA-E vs SA
TRINITY_DN237_c1_g1_i2	118.45	19.74	0.349508	0.145374	Nonsignificant	SA-E vs SA
TRINITY_DN2374_c0_g1_i1	181	31	0.226986	0.166955	Nonsignificant	SA-E vs SA
TRINITY_DN2375_c0_g1_i1	302	39	0.887605	-0.0559699	Nonsignificant	SA-E vs SA
TRINITY_DN2380_c0_g1_i1	81	19	0.0700096	0.415258	Nonsignificant	SA-E vs SA
TRINITY_DN2383_c0_g1_i1	60	9	0.788187	0.0622567	Nonsignificant	SA-E vs SA
TRINITY_DN2383_c1_g1_i1	129.46	6.35	0.0236484	-0.820264	Downregulated	SA-E vs SA
TRINITY_DN2383_c1_g1_i2	2010.54	126.65	5.37295e-05	-0.622738	Downregulated	SA-E vs SA
TRINITY_DN2383_c2_g1_i3	586	73	1	-0.0843886	Nonsignificant	SA-E vs SA
TRINITY_DN2389_c0_g1_i1	112	11	0.620038	-0.272091	Nonsignificant	SA-E vs SA
TRINITY_DN2397_c0_g2_i1	136	13	0.480962	-0.293488	Nonsignificant	SA-E vs SA
TRINITY_DN240_c0_g1_i1	177	28	0.389969	0.104239	Nonsignificant	SA-E vs SA
TRINITY_DN240_c0_g2_i10	1237.59	28.52	7.84644e-15	-1.41666	Downregulated	SA-E vs SA
TRINITY_DN240_c0_g2_i3	1403.04	85.35	5.95132e-05	-0.650296	Downregulated	SA-E vs SA
TRINITY_DN240_c0_g2_i5	3941.54	477.68	0.863067	-0.10612	Nonsignificant	SA-E vs SA
TRINITY_DN240_c0_g2_i8	1793.21	277.45	0.171897	0.0867302	Nonsignificant	SA-E vs SA
TRINITY_DN240_c0_g3_i1	373	33	0.156352	-0.35457	Nonsignificant	SA-E vs SA
TRINITY_DN24057_c0_g1_i1	197	11	0.0180774	-0.717935	Downregulated	SA-E vs SA
TRINITY_DN2406_c0_g1_i1	13	5	0.13207	0.805673	Nonsignificant	SA-E vs SA
TRINITY_DN2406_c1_g1_i1	44	4	0.729435	-0.333114	Nonsignificant	SA-E vs SA
TRINITY_DN241_c0_g1_i1	523.14	40.02	0.0250017	-0.469365	Downregulated	SA-E vs SA
TRINITY_DN241_c0_g1_i3	774.5	33.3	9.05101e-07	-0.924277	Downregulated	SA-E vs SA
TRINITY_DN241_c0_g1_i5	381.94	25.44	0.00988945	-0.57869	Downregulated	SA-E vs SA
TRINITY_DN241_c0_g1_i7	276.42	44.74	0.259001	0.122312	Nonsignificant	SA-E vs SA
TRINITY_DN241_c1_g1_i1	31	8	0.163583	0.490629	Nonsignificant	SA-E vs SA
TRINITY_DN2414_c0_g1_i1	1275.22	207	0.104867	0.124601	Nonsignificant	SA-E vs SA
TRINITY_DN2414_c0_g1_i4	173.88	43	0.00518753	0.45698	Upregulated	SA-E vs SA
TRINITY_DN2414_c0_g1_i6	370	33	0.15362	-0.348194	Nonsignificant	SA-E vs SA
TRINITY_DN24168_c0_g6_i1	46	4	0.610546	-0.368209	Nonsignificant	SA-E vs SA
TRINITY_DN24180_c0_g1_i1	37	9	0.195974	0.443931	Nonsignificant	SA-E vs SA
TRINITY_DN242_c0_g2_i3	138	8	0.0554375	-0.688331	Nonsignificant	SA-E vs SA
TRINITY_DN242_c0_g3_i1	90	2	0.00440277	-1.44536	Downregulated	SA-E vs SA
TRINITY_DN243_c0_g1_i7	147.1	4	0.00100613	-1.286	Downregulated	SA-E vs SA
TRINITY_DN2435_c0_g1_i2	2802	1034.38	3.1717e-13	0.773287	Upregulated	SA-E vs SA
TRINITY_DN2435_c1_g1_i1	174	32	0.143166	0.223161	Nonsignificant	SA-E vs SA
TRINITY_DN2435_c1_g2_i1	360	26	0.0316144	-0.514792	Downregulated	SA-E vs SA
TRINITY_DN24351_c0_g1_i1	17	5	0.227948	0.593874	Nonsignificant	SA-E vs SA
TRINITY_DN2441_c0_g1_i1	131	21	0.417605	0.114716	Nonsignificant	SA-E vs SA
TRINITY_DN2447_c0_g1_i1	392	16	3.80025e-05	-0.965342	Downregulated	SA-E vs SA
TRINITY_DN2447_c0_g2_i1	74	14	0.262101	0.245513	Nonsignificant	SA-E vs SA
TRINITY_DN2447_c0_g2_i2	122	18	0.602568	0.0492065	Nonsignificant	SA-E vs SA
TRINITY_DN246_c1_g1_i3	24	5	0.523805	0.321616	Nonsignificant	SA-E vs SA
TRINITY_DN2470_c0_g1_i1	486	58	0.868469	-0.118263	Nonsignificant	SA-E vs SA
TRINITY_DN2472_c0_g1_i1	5279	460	0.0173634	-0.366566	Downregulated	SA-E vs SA
TRINITY_DN2473_c0_g1_i1	167.27	18.01	0.705651	-0.199517	Nonsignificant	SA-E vs SA
TRINITY_DN2473_c0_g1_i2	39.34	10.77	0.0678932	0.537264	Nonsignificant	SA-E vs SA
TRINITY_DN2473_c0_g1_i3	324.39	78.23	0.000939581	0.437141	Upregulated	SA-E vs SA
TRINITY_DN2473_c0_g2_i1	4120.67	419.48	0.180146	-0.243788	Nonsignificant	SA-E vs SA
TRINITY_DN2473_c0_g2_i3	70	15.67	0.0946765	0.378358	Nonsignificant	SA-E vs SA
TRINITY_DN2473_c0_g2_i4	157.33	45.77	0.00038332	0.585236	Upregulated	SA-E vs SA
TRINITY_DN2473_c0_g2_i7	642	98	0.278639	0.0760725	Nonsignificant	SA-E vs SA
TRINITY_DN2474_c0_g1_i1	706	104	0.356014	0.0479629	Nonsignificant	SA-E vs SA
TRINITY_DN2474_c1_g1_i1	136	27	0.101126	0.28356	Nonsignificant	SA-E vs SA
TRINITY_DN2475_c0_g1_i1	547.44	81	0.370492	0.0514531	Nonsignificant	SA-E vs SA
TRINITY_DN2477_c0_g1_i2	718	78	0.473125	-0.192474	Nonsignificant	SA-E vs SA
TRINITY_DN2477_c0_g2_i1	143	10	0.124294	-0.540255	Nonsignificant	SA-E vs SA
TRINITY_DN2478_c0_g1_i1	138	16	0.866072	-0.14108	Nonsignificant	SA-E vs SA
TRINITY_DN2478_c0_g2_i1	519	22	1.33286e-05	-0.935489	Downregulated	SA-E vs SA
TRINITY_DN2479_c0_g1_i1	111	72	4.8131e-13	1.21831	Upregulated	SA-E vs SA
TRINITY_DN2485_c0_g1_i3	12128	2132.26	0.0166716	0.187622	Upregulated	SA-E vs SA
TRINITY_DN2485_c0_g1_i6	5091.82	983.77	0.00272331	0.262101	Upregulated	SA-E vs SA
TRINITY_DN2485_c0_g1_i8	655.62	108.33	0.124535	0.138619	Nonsignificant	SA-E vs SA
TRINITY_DN2485_c0_g1_i9	6611.81	502.64	0.000968613	-0.474314	Downregulated	SA-E vs SA
TRINITY_DN2485_c1_g1_i1	657	38	0.000409392	-0.690136	Downregulated	SA-E vs SA
TRINITY_DN2485_c2_g1_i1	303	44	0.525168	0.036658	Nonsignificant	SA-E vs SA
TRINITY_DN2486_c0_g1_i1	308	28	0.221009	-0.333114	Nonsignificant	SA-E vs SA
TRINITY_DN24985_c0_g1_i1	79	32	4.93146e-05	0.84657	Upregulated	SA-E vs SA
TRINITY_DN250_c0_g1_i1	524.61	48.89	0.178886	-0.313524	Nonsignificant	SA-E vs SA
TRINITY_DN250_c0_g1_i5	81.82	21.11	0.0318622	0.490448	Upregulated	SA-E vs SA
TRINITY_DN250_c0_g2_i2	119.84	26	0.0567127	0.353635	Nonsignificant	SA-E vs SA
TRINITY_DN250_c0_g3_i1	505	66	0.827267	-0.046526	Nonsignificant	SA-E vs SA
TRINITY_DN2500_c0_g1_i1	32	1	0.160156	-1.17619	Nonsignificant	SA-E vs SA
TRINITY_DN2505_c1_g1_i1	23	2	1	-0.368209	Nonsignificant	SA-E vs SA
TRINITY_DN25070_c0_g1_i1	108	2	0.0011366	-1.58931	Downregulated	SA-E vs SA
TRINITY_DN251_c0_g1_i2	46	1	0.0798343	-1.46271	Nonsignificant	SA-E vs SA
TRINITY_DN2516_c0_g2_i1	871	35	1.08629e-07	-0.977675	Downregulated	SA-E vs SA
TRINITY_DN2529_c0_g1_i1	81	4	0.0822399	-0.814925	Nonsignificant	SA-E vs SA
TRINITY_DN253_c0_g1_i1	474	41	0.102662	-0.372385	Nonsignificant	SA-E vs SA
TRINITY_DN2530_c0_g1_i1	16	11	0.00106861	1.26424	Upregulated	SA-E vs SA
TRINITY_DN25360_c0_g1_i1	135	10	0.162228	-0.494803	Nonsignificant	SA-E vs SA
TRINITY_DN254_c0_g1_i4	7	15	7.04324e-08	2.16179	Upregulated	SA-E vs SA
TRINITY_DN2542_c0_g1_i1	139	11	0.240754	-0.442607	Nonsignificant	SA-E vs SA
TRINITY_DN2542_c1_g1_i2	792.32	102.7	0.814575	-0.0530392	Nonsignificant	SA-E vs SA
TRINITY_DN2542_c1_g1_i4	1920.6	285.3	0.265028	0.0545733	Nonsignificant	SA-E vs SA
TRINITY_DN2542_c1_g2_i1	127	19	0.557509	0.0601817	Nonsignificant	SA-E vs SA
TRINITY_DN2544_c0_g1_i1	1214	164	0.625398	-0.0203976	Nonsignificant	SA-E vs SA
TRINITY_DN2545_c0_g1_i1	69	6	0.495638	-0.36821	Nonsignificant	SA-E vs SA
TRINITY_DN2545_c1_g1_i1	162	6	0.00249928	-1.04205	Downregulated	SA-E vs SA
TRINITY_DN2546_c0_g1_i1	7551.53	372.36	1.06793e-09	-0.816101	Downregulated	SA-E vs SA
TRINITY_DN2546_c0_g1_i11	987.04	287.06	1.2229e-07	0.584997	Upregulated	SA-E vs SA
TRINITY_DN2546_c0_g1_i12	12211	709.62	2.57125e-07	-0.6864	Downregulated	SA-E vs SA
TRINITY_DN2546_c0_g1_i15	284.39	133.95	9.0002e-13	0.965654	Upregulated	SA-E vs SA
TRINITY_DN2546_c0_g2_i1	518	60	0.750315	-0.141842	Nonsignificant	SA-E vs SA
TRINITY_DN2546_c1_g1_i1	519	88	0.101267	0.159014	Nonsignificant	SA-E vs SA
TRINITY_DN2546_c2_g1_i1	408	20	0.000338416	-0.820752	Downregulated	SA-E vs SA
TRINITY_DN255_c0_g1_i3	31	193	1.13093e-61	3.00386	Upregulated	SA-E vs SA
TRINITY_DN255_c0_g1_i4	2289	252	0.438812	-0.181958	Nonsignificant	SA-E vs SA
TRINITY_DN2552_c0_g1_i1	360	12	7.83098e-06	-1.12524	Downregulated	SA-E vs SA
TRINITY_DN2554_c0_g1_i1	560	50	0.113512	-0.34734	Nonsignificant	SA-E vs SA
TRINITY_DN2556_c0_g1_i2	507	73	0.470946	0.0299405	Nonsignificant	SA-E vs SA
TRINITY_DN256_c0_g5_i1	17	4	0.472	0.417698	Nonsignificant	SA-E vs SA
TRINITY_DN2561_c0_g1_i1	235	32	0.736546	-0.0141131	Nonsignificant	SA-E vs SA
TRINITY_DN2561_c0_g2_i1	84.64	9.76	1	-0.145382	Nonsignificant	SA-E vs SA
TRINITY_DN2561_c0_g2_i2	187.36	35.24	0.116162	0.240901	Nonsignificant	SA-E vs SA
TRINITY_DN2561_c1_g2_i1	27	17	0.000112452	1.19482	Upregulated	SA-E vs SA
TRINITY_DN2564_c0_g1_i1	93	25	0.0102955	0.522858	Upregulated	SA-E vs SA
TRINITY_DN257_c0_g1_i1	96.32	2.81	0.0112329	-1.23048	Downregulated	SA-E vs SA
TRINITY_DN257_c0_g1_i2	1893	144.19	0.00303336	-0.472773	Downregulated	SA-E vs SA
TRINITY_DN257_c0_g1_i3	43	7	0.747807	0.126863	Nonsignificant	SA-E vs SA
TRINITY_DN2572_c0_g1_i2	142	29	0.0733855	0.305893	Nonsignificant	SA-E vs SA
TRINITY_DN2574_c0_g1_i1	1887.32	315	0.0592973	0.146561	Nonsignificant	SA-E vs SA
TRINITY_DN2574_c0_g2_i1	583	43	0.0135612	-0.498196	Downregulated	SA-E vs SA
TRINITY_DN2574_c0_g3_i2	358	86	0.000742971	0.434068	Upregulated	SA-E vs SA
TRINITY_DN2574_c0_g4_i1	7178	612	0.0105225	-0.383761	Downregulated	SA-E vs SA
TRINITY_DN259_c0_g2_i1	5154	807	0.119704	0.096139	Nonsignificant	SA-E vs SA
TRINITY_DN2598_c0_g1_i1	549.27	67.74	1	-0.0923256	Nonsignificant	SA-E vs SA
TRINITY_DN2598_c0_g1_i2	122.48	6.8	0.0651021	-0.722449	Nonsignificant	SA-E vs SA
TRINITY_DN2598_c0_g1_i4	1206.29	70.07	3.70713e-05	-0.686751	Downregulated	SA-E vs SA
TRINITY_DN2598_c0_g1_i5	26.96	32.39	6.06272e-11	1.70494	Upregulated	SA-E vs SA
TRINITY_DN26_c0_g2_i7	67.98	10	0.803068	0.0468544	Nonsignificant	SA-E vs SA
TRINITY_DN260_c0_g1_i1	19346.4	738.8	2.35517e-15	-1.01789	Downregulated	SA-E vs SA
TRINITY_DN260_c0_g1_i3	2091.97	180.53	0.0245263	-0.374224	Downregulated	SA-E vs SA
TRINITY_DN260_c0_g1_i4	1711.61	283.67	0.0675252	0.141005	Nonsignificant	SA-E vs SA
TRINITY_DN260_c0_g2_i1	1191	162	0.59996	-0.0149836	Nonsignificant	SA-E vs SA
TRINITY_DN2601_c0_g1_i2	56	10	0.419497	0.199912	Nonsignificant	SA-E vs SA
TRINITY_DN26067_c0_g1_i1	50	3	0.297676	-0.661171	Nonsignificant	SA-E vs SA
TRINITY_DN26074_c0_g1_i1	20	10	0.00962572	1.01281	Upregulated	SA-E vs SA
TRINITY_DN2608_c0_g1_i2	610	75	0.978266	-0.0947396	Nonsignificant	SA-E vs SA
TRINITY_DN2608_c0_g2_i1	111	31	0.00410751	0.553003	Upregulated	SA-E vs SA
TRINITY_DN261_c0_g2_i1	353	26	0.0372991	-0.499289	Downregulated	SA-E vs SA
TRINITY_DN261_c0_g3_i1	6919.71	633.34	0.0370092	-0.327766	Downregulated	SA-E vs SA
TRINITY_DN261_c0_g3_i2	246.02	17.19	0.050069	-0.540907	Nonsignificant	SA-E vs SA
TRINITY_DN261_c0_g3_i4	13.27	3	0.559728	0.386138	Nonsignificant	SA-E vs SA
TRINITY_DN261_c0_g4_i1	1688	222	0.739735	-0.0415667	Nonsignificant	SA-E vs SA
TRINITY_DN261_c2_g1_i1	233	26	0.722832	-0.1713	Nonsignificant	SA-E vs SA
TRINITY_DN2610_c0_g1_i1	834.72	120	0.421556	0.0287143	Nonsignificant	SA-E vs SA
TRINITY_DN26102_c0_g1_i1	23	1	0.593113	-0.915461	Nonsignificant	SA-E vs SA
TRINITY_DN26109_c0_g1_i1	209	22	0.60266	-0.217368	Nonsignificant	SA-E vs SA
TRINITY_DN26162_c0_g1_i1	29	2	0.499675	-0.551221	Nonsignificant	SA-E vs SA
TRINITY_DN26163_c0_g1_i1	458	52	0.697445	-0.157628	Nonsignificant	SA-E vs SA
TRINITY_DN26170_c0_g1_i1	17	10	0.00268218	1.14113	Upregulated	SA-E vs SA
TRINITY_DN26179_c0_g1_i1	184	40	0.0230951	0.355218	Upregulated	SA-E vs SA
TRINITY_DN2618_c0_g1_i1	238	15	0.0257956	-0.622334	Downregulated	SA-E vs SA
TRINITY_DN26193_c0_g1_i1	108	26	0.026396	0.435766	Upregulated	SA-E vs SA
TRINITY_DN26203_c0_g1_i1	1635	194	0.773298	-0.122822	Nonsignificant	SA-E vs SA
TRINITY_DN2623_c0_g1_i2	146.59	18	1	-0.0957635	Nonsignificant	SA-E vs SA
TRINITY_DN2623_c0_g1_i4	673.78	58	0.0638112	-0.376195	Nonsignificant	SA-E vs SA
TRINITY_DN26238_c0_g1_i1	68	4	0.193029	-0.676805	Nonsignificant	SA-E vs SA
TRINITY_DN26241_c0_g1_i1	57	20	0.00366341	0.733189	Upregulated	SA-E vs SA
TRINITY_DN26247_c0_g1_i1	221	43	0.0574502	0.267655	Nonsignificant	SA-E vs SA
TRINITY_DN26273_c0_g1_i1	15	9	0.00664724	1.15676	Upregulated	SA-E vs SA
TRINITY_DN263_c1_g1_i1	51	4	0.504731	-0.449675	Nonsignificant	SA-E vs SA
TRINITY_DN263_c1_g2_i3	3086.36	264	0.0162975	-0.381198	Downregulated	SA-E vs SA
TRINITY_DN263_c2_g1_i1	35	6	0.596505	0.167682	Nonsignificant	SA-E vs SA
TRINITY_DN26307_c0_g1_i1	32	11	0.0370978	0.716987	Upregulated	SA-E vs SA
TRINITY_DN26363_c0_g1_i1	54	16	0.020365	0.599701	Upregulated	SA-E vs SA
TRINITY_DN2638_c0_g1_i1	23	1	0.593113	-0.915461	Nonsignificant	SA-E vs SA
TRINITY_DN26392_c0_g1_i1	2879	290	0.171486	-0.252127	Nonsignificant	SA-E vs SA
TRINITY_DN26396_c0_g1_i1	27	4	0.832022	0.052449	Nonsignificant	SA-E vs SA
TRINITY_DN26398_c0_g1_i1	58	5	0.546629	-0.375045	Nonsignificant	SA-E vs SA
TRINITY_DN264_c0_g1_i5	235	47	0.040933	0.289387	Upregulated	SA-E vs SA
TRINITY_DN264_c0_g1_i8	220	50	0.00796422	0.390313	Upregulated	SA-E vs SA
TRINITY_DN26443_c0_g1_i1	62	4	0.297807	-0.603875	Nonsignificant	SA-E vs SA
TRINITY_DN26453_c0_g1_i1	146	8	0.0410741	-0.732823	Downregulated	SA-E vs SA
TRINITY_DN26483_c0_g1_i1	118	32	0.00570313	0.529786	Upregulated	SA-E vs SA
TRINITY_DN26497_c0_g1_i1	345	19	0.00257805	-0.728828	Downregulated	SA-E vs SA
TRINITY_DN2652_c0_g2_i1	15	15	1.05674e-05	1.56007	Upregulated	SA-E vs SA
TRINITY_DN2653_c0_g1_i1	143	18	1	-0.0761875	Nonsignificant	SA-E vs SA
TRINITY_DN26583_c0_g1_i1	500	22	2.65057e-05	-0.906044	Downregulated	SA-E vs SA
TRINITY_DN26586_c0_g1_i1	292	32	0.613461	-0.185571	Nonsignificant	SA-E vs SA
TRINITY_DN266_c0_g1_i1	170.54	18.87	0.769313	-0.177975	Nonsignificant	SA-E vs SA
TRINITY_DN266_c0_g1_i2	396.46	42.13	0.492454	-0.209886	Nonsignificant	SA-E vs SA
TRINITY_DN266_c0_g2_i1	1273.34	151.59	0.80583	-0.1202	Nonsignificant	SA-E vs SA
TRINITY_DN266_c0_g2_i2	1093.66	96.41	0.0496604	-0.357416	Downregulated	SA-E vs SA
TRINITY_DN266_c0_g3_i1	639	37	0.000448848	-0.689259	Downregulated	SA-E vs SA
TRINITY_DN2666_c0_g1_i1	8134.84	524.25	9.9885e-06	-0.604746	Downregulated	SA-E vs SA
TRINITY_DN2666_c0_g1_i2	4493.16	1111.75	2.92866e-06	0.457409	Upregulated	SA-E vs SA
TRINITY_DN2666_c1_g1_i2	439	80.96	0.0444547	0.225352	Upregulated	SA-E vs SA
TRINITY_DN26667_c0_g1_i1	288	30	0.503117	-0.225635	Nonsignificant	SA-E vs SA
TRINITY_DN2668_c0_g1_i1	52	1	0.0397031	-1.55951	Downregulated	SA-E vs SA
TRINITY_DN267_c0_g1_i8	61	19	0.00749061	0.639145	Upregulated	SA-E vs SA
TRINITY_DN2673_c0_g1_i2	531.86	41	0.0273317	-0.463316	Downregulated	SA-E vs SA
TRINITY_DN26731_c0_g1_i1	12	11	0.000143701	1.49137	Upregulated	SA-E vs SA
TRINITY_DN2674_c0_g1_i1	28	4	1	0.0237361	Nonsignificant	SA-E vs SA
TRINITY_DN2674_c1_g1_i1	1172	131	0.533168	-0.16998	Nonsignificant	SA-E vs SA
TRINITY_DN2674_c1_g2_i1	751.65	65	0.0580567	-0.372581	Nonsignificant	SA-E vs SA
TRINITY_DN2674_c2_g1_i1	40.59	6.75	0.623404	0.143688	Nonsignificant	SA-E vs SA
TRINITY_DN2674_c2_g1_i2	71.41	24.25	0.00159636	0.70737	Upregulated	SA-E vs SA
TRINITY_DN26787_c0_g1_i1	16	4	0.439814	0.465563	Nonsignificant	SA-E vs SA
TRINITY_DN26799_c0_g1_i2	135.81	21	0.474492	0.0862466	Nonsignificant	SA-E vs SA
TRINITY_DN2686_c0_g1_i1	76	1	0.00381958	-1.85912	Downregulated	SA-E vs SA
TRINITY_DN26911_c0_g1_i1	245	18	0.0697261	-0.501274	Nonsignificant	SA-E vs SA
TRINITY_DN2693_c0_g1_i1	41	8	0.428549	0.269892	Nonsignificant	SA-E vs SA
TRINITY_DN2693_c2_g1_i1	191	20	0.579213	-0.221513	Nonsignificant	SA-E vs SA
TRINITY_DN2693_c3_g1_i1	52	16	0.0133442	0.629497	Upregulated	SA-E vs SA
TRINITY_DN2694_c0_g1_i1	456.69	18.22	1.14179e-05	-0.983353	Downregulated	SA-E vs SA
TRINITY_DN2694_c0_g1_i2	246.31	32.78	0.785451	-0.032211	Nonsignificant	SA-E vs SA
TRINITY_DN26952_c0_g1_i1	106	115	4.5814e-25	1.62441	Upregulated	SA-E vs SA
TRINITY_DN2696_c0_g1_i1	32	8	0.163583	0.465563	Nonsignificant	SA-E vs SA
TRINITY_DN26969_c0_g1_i1	774	2535	1.47521e-82	2.49673	Upregulated	SA-E vs SA
TRINITY_DN26972_c0_g1_i1	96	33	0.00030576	0.716987	Upregulated	SA-E vs SA
TRINITY_DN26975_c0_g1_i1	143	20	0.752309	0.00699647	Nonsignificant	SA-E vs SA
TRINITY_DN26986_c0_g1_i1	28	1	0.319467	-1.07077	Nonsignificant	SA-E vs SA
TRINITY_DN270_c0_g1_i2	1350	458	1.03151e-10	0.706605	Upregulated	SA-E vs SA
TRINITY_DN270_c0_g2_i1	71	14	0.252277	0.278188	Nonsignificant	SA-E vs SA
TRINITY_DN27009_c0_g1_i1	70	3	0.0768534	-0.926821	Nonsignificant	SA-E vs SA
TRINITY_DN27028_c0_g1_i1	23	7	0.111707	0.620869	Nonsignificant	SA-E vs SA
TRINITY_DN27075_c0_g1_i1	197	33	0.253982	0.149438	Nonsignificant	SA-E vs SA
TRINITY_DN2708_c1_g1_i1	72	5	0.339516	-0.545757	Nonsignificant	SA-E vs SA
TRINITY_DN27088_c0_g1_i1	17	8	0.0231566	0.96495	Upregulated	SA-E vs SA
TRINITY_DN27093_c0_g1_i1	236	25	0.592946	-0.212366	Nonsignificant	SA-E vs SA
TRINITY_DN27131_c0_g1_i1	21	4	0.643095	0.250866	Nonsignificant	SA-E vs SA
TRINITY_DN27143_c0_g1_i1	301	24	0.0982135	-0.436668	Nonsignificant	SA-E vs SA
TRINITY_DN272_c0_g1_i1	605.95	123.99	0.00535196	0.30742	Upregulated	SA-E vs SA
TRINITY_DN272_c0_g1_i2	15088.6	1290.36	0.00943844	-0.381374	Downregulated	SA-E vs SA
TRINITY_DN272_c0_g1_i3	20	4	0.643095	0.289387	Nonsignificant	SA-E vs SA
TRINITY_DN272_c0_g1_i4	2817.41	121.65	3.35329e-10	-0.920934	Downregulated	SA-E vs SA
TRINITY_DN27234_c0_g1_i1	55	5	0.646181	-0.333114	Nonsignificant	SA-E vs SA
TRINITY_DN274_c0_g2_i1	8462	1193	0.393605	0.013311	Nonsignificant	SA-E vs SA
TRINITY_DN27420_c0_g1_i1	166	9	0.0269419	-0.74119	Downregulated	SA-E vs SA
TRINITY_DN2746_c0_g1_i1	76	3	0.0663279	-0.99175	Nonsignificant	SA-E vs SA
TRINITY_DN2746_c0_g2_i2	304	19	0.0119081	-0.628941	Downregulated	SA-E vs SA
TRINITY_DN2746_c0_g3_i1	7685.9	757	0.110461	-0.269861	Nonsignificant	SA-E vs SA
TRINITY_DN275_c0_g1_i11	67.85	5.69	0.580767	-0.396823	Nonsignificant	SA-E vs SA
TRINITY_DN275_c0_g1_i3	1634.49	164.35	0.195323	-0.253525	Nonsignificant	SA-E vs SA
TRINITY_DN275_c0_g1_i6	1448.41	51.34	5.69721e-11	-1.07673	Downregulated	SA-E vs SA
TRINITY_DN275_c0_g1_i8	566.66	63.63	0.63386	-0.166352	Nonsignificant	SA-E vs SA
TRINITY_DN275_c0_g1_i9	174.36	11.21	0.0503949	-0.606619	Nonsignificant	SA-E vs SA
TRINITY_DN2750_c0_g1_i1	101	7	0.17783	-0.547322	Nonsignificant	SA-E vs SA
TRINITY_DN2752_c0_g1_i1	65.9	21.19	0.00619366	0.664272	Upregulated	SA-E vs SA
TRINITY_DN2752_c0_g1_i2	1417.1	132.81	0.0979507	-0.309076	Nonsignificant	SA-E vs SA
TRINITY_DN2752_c0_g2_i1	388	60	0.305258	0.0863047	Nonsignificant	SA-E vs SA
TRINITY_DN27529_c0_g1_i1	12	3	0.559728	0.465563	Nonsignificant	SA-E vs SA
TRINITY_DN27561_c0_g1_i1	23	16	9.82733e-05	1.27355	Upregulated	SA-E vs SA
TRINITY_DN2758_c0_g1_i1	143.4	18	1	-0.0783929	Nonsignificant	SA-E vs SA
TRINITY_DN2758_c0_g1_i3	145.56	45	0.000224833	0.633231	Upregulated	SA-E vs SA
TRINITY_DN2758_c0_g2_i1	1067	239	0.000283242	0.378835	Upregulated	SA-E vs SA
TRINITY_DN2758_c0_g3_i1	85	14	0.455434	0.136097	Nonsignificant	SA-E vs SA
TRINITY_DN27581_c0_g1_i1	83	14	0.455434	0.154896	Nonsignificant	SA-E vs SA
TRINITY_DN276_c0_g1_i3	443.15	205.57	1.61877e-14	0.953621	Upregulated	SA-E vs SA
TRINITY_DN276_c0_g1_i4	219.97	26.02	0.903281	-0.125258	Nonsignificant	SA-E vs SA
TRINITY_DN276_c0_g1_i6	388.37	71.51	0.047285	0.224107	Upregulated	SA-E vs SA
TRINITY_DN276_c0_g1_i7	3344.51	441.89	0.697618	-0.0379288	Nonsignificant	SA-E vs SA
TRINITY_DN276_c0_g2_i1	65	13	0.23194	0.289387	Nonsignificant	SA-E vs SA
TRINITY_DN276_c0_g3_i1	35	19	0.000205848	1.07774	Upregulated	SA-E vs SA
TRINITY_DN276_c0_g4_i1	187	32	0.214462	0.166273	Nonsignificant	SA-E vs SA
TRINITY_DN276_c0_g5_i1	205	27	0.851927	-0.0404226	Nonsignificant	SA-E vs SA
TRINITY_DN276_c1_g1_i1	110	2	0.00149235	-1.60379	Downregulated	SA-E vs SA
TRINITY_DN27650_c0_g1_i1	57	2	0.0925345	-1.08474	Nonsignificant	SA-E vs SA
TRINITY_DN2766_c0_g1_i1	2393	279	0.677963	-0.136679	Nonsignificant	SA-E vs SA
TRINITY_DN27686_c0_g1_i1	32	19	3.79475e-05	1.14849	Upregulated	SA-E vs SA
TRINITY_DN277_c0_g1_i1	4314.08	404.8	0.0619146	-0.308127	Nonsignificant	SA-E vs SA
TRINITY_DN277_c0_g1_i3	2357.67	291.2	0.961468	-0.0911457	Nonsignificant	SA-E vs SA
TRINITY_DN2771_c0_g1_i1	92	18	0.174464	0.272034	Nonsignificant	SA-E vs SA
TRINITY_DN2774_c0_g1_i2	26.66	26	2.81996e-08	1.54027	Upregulated	SA-E vs SA
TRINITY_DN27754_c0_g1_i1	36	12	0.023845	0.692693	Upregulated	SA-E vs SA
TRINITY_DN2777_c0_g1_i1	17.99	8.21	0.0231566	0.940719	Upregulated	SA-E vs SA
TRINITY_DN2777_c0_g1_i3	655.01	55.79	0.0654953	-0.38456	Nonsignificant	SA-E vs SA
TRINITY_DN2778_c0_g1_i2	15	12.41	0.000206996	1.41041	Upregulated	SA-E vs SA
TRINITY_DN2779_c0_g1_i2	229.16	18	0.120812	-0.448505	Nonsignificant	SA-E vs SA
TRINITY_DN2779_c0_g2_i3	183	5	0.000228795	-1.28223	Downregulated	SA-E vs SA
TRINITY_DN2779_c0_g2_i4	2681	373.39	0.470735	0.0036731	Nonsignificant	SA-E vs SA
TRINITY_DN27794_c0_g1_i1	4	14	7.44748e-07	2.54914	Upregulated	SA-E vs SA
TRINITY_DN278_c0_g1_i2	940.92	35.64	2.09721e-08	-1.02433	Downregulated	SA-E vs SA
TRINITY_DN278_c0_g1_i3	0.08	40.36	5.93548e-17	6.47367	Upregulated	SA-E vs SA
TRINITY_DN278_c1_g1_i5	106.34	10	0.533951	-0.306398	Nonsignificant	SA-E vs SA
TRINITY_DN27808_c0_g1_i1	123	15	1	-0.101185	Nonsignificant	SA-E vs SA
TRINITY_DN2782_c0_g1_i1	877	80	0.0968263	-0.330418	Nonsignificant	SA-E vs SA
TRINITY_DN2782_c1_g1_i1	210	11	0.00988045	-0.768389	Downregulated	SA-E vs SA
TRINITY_DN27863_c0_g1_i1	73	27	0.000329839	0.774794	Upregulated	SA-E vs SA
TRINITY_DN27875_c0_g1_i1	14	11	0.000556462	1.36966	Upregulated	SA-E vs SA
TRINITY_DN2788_c0_g2_i1	87	2	0.00834208	-1.41859	Downregulated	SA-E vs SA
TRINITY_DN2789_c0_g2_i1	33	5	0.847719	0.0701917	Nonsignificant	SA-E vs SA
TRINITY_DN2789_c0_g3_i1	653	107	0.13367	0.132028	Nonsignificant	SA-E vs SA
TRINITY_DN2789_c0_g4_i1	962	72	0.00698974	-0.486638	Downregulated	SA-E vs SA
TRINITY_DN280_c0_g1_i1	235	1	1.67695e-09	-2.75037	Downregulated	SA-E vs SA
TRINITY_DN280_c0_g2_i2	248.89	44	0.137296	0.191973	Nonsignificant	SA-E vs SA
TRINITY_DN28040_c0_g1_i1	18	1	0.559728	-0.721932	Nonsignificant	SA-E vs SA
TRINITY_DN28048_c0_g1_i1	145	4	0.00131234	-1.27465	Downregulated	SA-E vs SA
TRINITY_DN28081_c0_g1_i1	22	2	0.797512	-0.333114	Nonsignificant	SA-E vs SA
TRINITY_DN28086_c0_g1_i1	180	17	0.416767	-0.302993	Nonsignificant	SA-E vs SA
TRINITY_DN281_c1_g1_i2	2565.1	358.67	0.448377	0.00680882	Nonsignificant	SA-E vs SA
TRINITY_DN281_c1_g1_i4	2898.65	215.66	0.00119641	-0.491335	Downregulated	SA-E vs SA
TRINITY_DN281_c1_g1_i7	4430.53	544.67	0.93732	-0.0948371	Nonsignificant	SA-E vs SA
TRINITY_DN281_c2_g1_i1	602	106	0.0572475	0.188818	Nonsignificant	SA-E vs SA
TRINITY_DN28109_c0_g1_i1	62	18	0.0185387	0.58362	Upregulated	SA-E vs SA
TRINITY_DN2813_c0_g1_i2	169.88	56	2.5868e-05	0.683906	Upregulated	SA-E vs SA
TRINITY_DN28176_c0_g1_i1	95	17	0.282632	0.201572	Nonsignificant	SA-E vs SA
TRINITY_DN28200_c0_g1_i1	83	6	0.317351	-0.51406	Nonsignificant	SA-E vs SA
TRINITY_DN28422_c0_g1_i1	92	11	1	-0.116785	Nonsignificant	SA-E vs SA
TRINITY_DN28424_c0_g1_i1	20	1	0.559728	-0.805116	Nonsignificant	SA-E vs SA
TRINITY_DN28425_c0_g1_i1	55	4	0.428549	-0.50929	Nonsignificant	SA-E vs SA
TRINITY_DN2852_c0_g1_i1	164	12	0.138131	-0.50449	Nonsignificant	SA-E vs SA
TRINITY_DN28587_c0_g1_i1	26	8	0.094398	0.629497	Nonsignificant	SA-E vs SA
TRINITY_DN286_c0_g1_i2	1024	113	0.491474	-0.180097	Nonsignificant	SA-E vs SA
TRINITY_DN286_c0_g2_i1	134	7	0.0389822	-0.770534	Downregulated	SA-E vs SA
TRINITY_DN286_c0_g3_i1	2545	211	0.010723	-0.405854	Downregulated	SA-E vs SA
TRINITY_DN286_c0_g5_i1	61	20	0.00441553	0.679642	Upregulated	SA-E vs SA
TRINITY_DN2861_c0_g1_i1	66.55	12	0.39831	0.207586	Nonsignificant	SA-E vs SA
TRINITY_DN2861_c0_g1_i2	101.78	17.1	0.395362	0.151776	Nonsignificant	SA-E vs SA
TRINITY_DN2861_c0_g1_i3	487.68	31.9	0.00570918	-0.59299	Downregulated	SA-E vs SA
TRINITY_DN2862_c0_g1_i1	49	6	1	-0.0979686	Nonsignificant	SA-E vs SA
TRINITY_DN28659_c0_g1_i1	51	11	0.218659	0.349001	Nonsignificant	SA-E vs SA
TRINITY_DN287_c0_g1_i1	1644	324	0.00320714	0.277776	Upregulated	SA-E vs SA
TRINITY_DN287_c0_g1_i5	513	47	0.158808	-0.326982	Nonsignificant	SA-E vs SA
TRINITY_DN28741_c0_g1_i1	80	1	0.00266073	-1.89962	Downregulated	SA-E vs SA
TRINITY_DN28767_c0_g1_i1	30	12	0.0110484	0.836639	Upregulated	SA-E vs SA
TRINITY_DN288_c0_g1_i1	327	61	0.0535932	0.234398	Nonsignificant	SA-E vs SA
TRINITY_DN28812_c0_g1_i1	14	7	0.0384743	1.01281	Upregulated	SA-E vs SA
TRINITY_DN289_c0_g1_i1	24	1	0.439814	-0.949062	Nonsignificant	SA-E vs SA
TRINITY_DN2893_c0_g1_i1	25	7	0.175453	0.555037	Nonsignificant	SA-E vs SA
TRINITY_DN29_c0_g1_i11	1475	7	2.31307e-32	-2.66425	Downregulated	SA-E vs SA
TRINITY_DN29_c0_g1_i8	125	1	5.41541e-05	-2.25197	Downregulated	SA-E vs SA
TRINITY_DN290_c1_g1_i1	545	70	0.882959	-0.0602532	Nonsignificant	SA-E vs SA
TRINITY_DN2907_c0_g1_i1	76	2	0.0174197	-1.31187	Downregulated	SA-E vs SA
TRINITY_DN2907_c0_g2_i1	214	24	0.753401	-0.167337	Nonsignificant	SA-E vs SA
TRINITY_DN2913_c0_g1_i2	256.13	44	0.155541	0.169335	Nonsignificant	SA-E vs SA
TRINITY_DN2918_c0_g1_i1	516	72	0.569112	0.00515822	Nonsignificant	SA-E vs SA
TRINITY_DN292_c0_g1_i10	628	130	0.00404553	0.316572	Upregulated	SA-E vs SA
TRINITY_DN292_c0_g1_i13	777.71	100.96	0.828327	-0.051836	Nonsignificant	SA-E vs SA
TRINITY_DN292_c0_g1_i16	4185	419	0.149079	-0.256922	Nonsignificant	SA-E vs SA
TRINITY_DN292_c0_g1_i23	5289.99	639.41	0.83962	-0.108205	Nonsignificant	SA-E vs SA
TRINITY_DN292_c0_g1_i4	29565	5309.89	0.0103566	0.204448	Upregulated	SA-E vs SA
TRINITY_DN292_c0_g2_i1	557	91	0.145187	0.129693	Nonsignificant	SA-E vs SA
TRINITY_DN292_c1_g1_i1	109.44	20.4	0.216552	0.233802	Nonsignificant	SA-E vs SA
TRINITY_DN292_c1_g1_i3	1283.96	280.3	0.00039986	0.358544	Upregulated	SA-E vs SA
TRINITY_DN292_c1_g1_i4	1006.1	187.7	0.0140323	0.234473	Upregulated	SA-E vs SA
TRINITY_DN292_c1_g1_i5	913.5	152.61	0.0806585	0.147305	Nonsignificant	SA-E vs SA
TRINITY_DN29223_c0_g1_i1	31	8	0.163583	0.490629	Nonsignificant	SA-E vs SA
TRINITY_DN29270_c0_g1_i1	12	9	0.00394482	1.33294	Upregulated	SA-E vs SA
TRINITY_DN2933_c0_g1_i1	38	3	0.564053	-0.444498	Nonsignificant	SA-E vs SA
TRINITY_DN2933_c1_g1_i1	72	11	0.633545	0.0767437	Nonsignificant	SA-E vs SA
TRINITY_DN2975_c0_g1_i1	205	56	0.000458967	0.535542	Upregulated	SA-E vs SA
TRINITY_DN29789_c0_g1_i1	12	1	1	-0.401811	Nonsignificant	SA-E vs SA
TRINITY_DN298_c0_g1_i1	1525.29	262.76	0.0400406	0.171543	Upregulated	SA-E vs SA
TRINITY_DN298_c0_g1_i2	12043.7	1300.24	0.32348	-0.197395	Nonsignificant	SA-E vs SA
TRINITY_DN298_c0_g1_i3	217.46	61.35	0.000174519	0.560995	Upregulated	SA-E vs SA
TRINITY_DN298_c0_g1_i6	768.73	152.65	0.00587487	0.283738	Upregulated	SA-E vs SA
TRINITY_DN298_c0_g2_i1	86.7	25.43	0.00655998	0.591704	Upregulated	SA-E vs SA
TRINITY_DN298_c0_g2_i3	1478.3	144.57	0.156046	-0.275471	Nonsignificant	SA-E vs SA
TRINITY_DN298_c0_g3_i2	1015	128	0.958479	-0.0747196	Nonsignificant	SA-E vs SA
TRINITY_DN2981_c0_g1_i5	19688	2824.81	0.322766	0.027164	Nonsignificant	SA-E vs SA
TRINITY_DN2982_c0_g1_i2	92	7	0.287635	-0.473635	Nonsignificant	SA-E vs SA
TRINITY_DN299_c0_g1_i1	23.16	2.74	1	-0.125134	Nonsignificant	SA-E vs SA
TRINITY_DN299_c0_g1_i2	2789.91	186.68	0.000118394	-0.57508	Downregulated	SA-E vs SA
TRINITY_DN299_c0_g1_i4	71.23	14.58	0.17783	0.307683	Nonsignificant	SA-E vs SA
TRINITY_DN2992_c0_g1_i1	99	10	0.667032	-0.24993	Nonsignificant	SA-E vs SA
TRINITY_DN2993_c0_g1_i1	87	9	0.729274	-0.231099	Nonsignificant	SA-E vs SA
TRINITY_DN2996_c0_g1_i1	815	54	0.00145735	-0.582846	Downregulated	SA-E vs SA
TRINITY_DN2997_c0_g1_i1	519	42	0.0483803	-0.424966	Downregulated	SA-E vs SA
TRINITY_DN300_c0_g1_i2	161.13	4	0.000430601	-1.35793	Downregulated	SA-E vs SA
TRINITY_DN300_c0_g2_i1	1240	139	0.544049	-0.167708	Nonsignificant	SA-E vs SA
TRINITY_DN300_c0_g3_i1	255	26	0.459975	-0.242534	Nonsignificant	SA-E vs SA
TRINITY_DN3000_c0_g1_i1	20	1	0.559728	-0.805116	Nonsignificant	SA-E vs SA
TRINITY_DN3001_c0_g1_i1	289	36	1	-0.084426	Nonsignificant	SA-E vs SA
TRINITY_DN3001_c0_g2_i1	355	74	0.00998829	0.322061	Upregulated	SA-E vs SA
TRINITY_DN301_c0_g1_i1	191	23	1	-0.111168	Nonsignificant	SA-E vs SA
TRINITY_DN301_c0_g2_i1	1428.32	210.06	0.305427	0.0466708	Nonsignificant	SA-E vs SA
TRINITY_DN301_c0_g2_i3	1570.97	143.94	0.0679509	-0.326922	Nonsignificant	SA-E vs SA
TRINITY_DN301_c0_g2_i4	249.71	39	0.355435	0.0941385	Nonsignificant	SA-E vs SA
TRINITY_DN3022_c0_g1_i1	283	45	0.284493	0.108314	Nonsignificant	SA-E vs SA
TRINITY_DN3022_c0_g2_i2	24.32	10.33	0.0191693	0.884044	Upregulated	SA-E vs SA
TRINITY_DN3022_c0_g2_i3	1583.68	184.67	0.702311	-0.136557	Nonsignificant	SA-E vs SA
TRINITY_DN3023_c0_g1_i1	189	3	6.47655e-06	-1.71101	Downregulated	SA-E vs SA
TRINITY_DN303_c0_g1_i13	3172.94	389.54	0.936532	-0.0959053	Nonsignificant	SA-E vs SA
TRINITY_DN303_c0_g1_i7	1672.06	178.46	0.338961	-0.206438	Nonsignificant	SA-E vs SA
TRINITY_DN303_c0_g2_i1	512	77	0.332694	0.06431	Nonsignificant	SA-E vs SA
TRINITY_DN303_c1_g1_i1	324	49	0.394829	0.0687281	Nonsignificant	SA-E vs SA
TRINITY_DN3035_c0_g1_i1	366	6	3.33522e-09	-1.68554	Downregulated	SA-E vs SA
TRINITY_DN3039_c0_g1_i1	95	8	0.42843	-0.393544	Nonsignificant	SA-E vs SA
TRINITY_DN304_c0_g1_i1	283.98	19	0.0243483	-0.575156	Downregulated	SA-E vs SA
TRINITY_DN305_c0_g1_i10	16	6	0.11103	0.785684	Nonsignificant	SA-E vs SA
TRINITY_DN305_c0_g1_i6	20	3	1	0.0622569	Nonsignificant	SA-E vs SA
TRINITY_DN306_c0_g1_i3	27.05	13	0.00401524	0.981557	Upregulated	SA-E vs SA
TRINITY_DN3068_c0_g1_i1	212.5	23.85	0.800622	-0.166733	Nonsignificant	SA-E vs SA
TRINITY_DN3068_c0_g1_i2	272.44	15.15	0.00684828	-0.72118	Downregulated	SA-E vs SA
TRINITY_DN307_c0_g1_i1	591	71	0.86571	-0.113029	Nonsignificant	SA-E vs SA
TRINITY_DN3073_c0_g1_i1	34	7	0.376638	0.312273	Nonsignificant	SA-E vs SA
TRINITY_DN30884_c0_g1_i1	5	16	3.94049e-08	2.47839	Upregulated	SA-E vs SA
TRINITY_DN30888_c0_g1_i1	24	10	0.0191693	0.868868	Upregulated	SA-E vs SA
TRINITY_DN3089_c0_g1_i3	21	5.15	0.381255	0.450379	Nonsignificant	SA-E vs SA
TRINITY_DN3089_c0_g1_i6	16	2	1	-0.0816891	Nonsignificant	SA-E vs SA
TRINITY_DN309_c0_g1_i1	478	59	1	-0.0916624	Nonsignificant	SA-E vs SA
TRINITY_DN309_c0_g1_i2	149	19	0.937522	-0.065951	Nonsignificant	SA-E vs SA
TRINITY_DN309_c0_g2_i3	718.72	27.96	3.2171e-07	-1.00326	Downregulated	SA-E vs SA
TRINITY_DN309_c0_g2_i4	635.62	33.29	8.93868e-05	-0.768493	Downregulated	SA-E vs SA
TRINITY_DN309_c0_g2_i5	196.35	28.63	0.531601	0.0398946	Nonsignificant	SA-E vs SA
TRINITY_DN309_c0_g2_i6	240.35	77.12	3.95784e-06	0.662595	Upregulated	SA-E vs SA
TRINITY_DN3092_c0_g1_i3	645	66	0.334025	-0.239715	Nonsignificant	SA-E vs SA
TRINITY_DN3092_c0_g2_i1	1333	143	0.385704	-0.202408	Nonsignificant	SA-E vs SA
TRINITY_DN3092_c0_g4_i1	71	17	0.06291	0.431477	Nonsignificant	SA-E vs SA
TRINITY_DN30921_c0_g1_i1	16	2	1	-0.0816891	Nonsignificant	SA-E vs SA
TRINITY_DN30926_c0_g1_i1	24	1	0.439814	-0.949062	Nonsignificant	SA-E vs SA
TRINITY_DN30941_c0_g1_i1	39	4	0.854227	-0.237876	Nonsignificant	SA-E vs SA
TRINITY_DN3096_c0_g1_i2	193	8.17	0.00283689	-0.936563	Downregulated	SA-E vs SA
TRINITY_DN3096_c0_g2_i1	341.22	86	0.000310763	0.471969	Upregulated	SA-E vs SA
TRINITY_DN3096_c0_g2_i2	403.35	15	1.06385e-05	-1.03883	Downregulated	SA-E vs SA
TRINITY_DN3098_c1_g1_i1	98	9	0.510322	-0.325099	Nonsignificant	SA-E vs SA
TRINITY_DN31_c0_g1_i10	71.71	7.65	0.899603	-0.206814	Nonsignificant	SA-E vs SA
TRINITY_DN31_c0_g1_i11	1934.13	33.44	2.23568e-22	-1.64353	Downregulated	SA-E vs SA
TRINITY_DN31_c0_g1_i17	2863.81	2.29	6.34805e-58	-4.07026	Downregulated	SA-E vs SA
TRINITY_DN31_c0_g1_i3	8841.39	13.93	1.14487e-83	-3.53481	Downregulated	SA-E vs SA
TRINITY_DN31_c0_g1_i5	12.72	1.1	1	-0.372566	Nonsignificant	SA-E vs SA
TRINITY_DN31_c0_g1_i7	1049.56	52.38	2.42865e-06	-0.806593	Downregulated	SA-E vs SA
TRINITY_DN310_c0_g1_i1	8887	2264	7.98327e-07	0.480435	Upregulated	SA-E vs SA
TRINITY_DN31002_c0_g1_i1	46	5	1	-0.192034	Nonsignificant	SA-E vs SA
TRINITY_DN31017_c0_g1_i1	413.94	70.96	0.116569	0.167669	Nonsignificant	SA-E vs SA
TRINITY_DN31017_c0_g1_i2	26719.1	5952.04	4.96312e-05	0.374493	Upregulated	SA-E vs SA
TRINITY_DN31030_c0_g1_i1	20	1	0.559728	-0.805116	Nonsignificant	SA-E vs SA
TRINITY_DN31059_c0_g1_i1	227	24	0.582558	-0.213898	Nonsignificant	SA-E vs SA
TRINITY_DN31065_c0_g1_i1	42	8	0.428549	0.250866	Nonsignificant	SA-E vs SA
TRINITY_DN311_c0_g1_i1	4615.13	6652.71	5.47157e-55	1.84878	Upregulated	SA-E vs SA
TRINITY_DN311_c0_g1_i10	4273.98	0.01	2.87855e-75	-8.67632	Downregulated	SA-E vs SA
TRINITY_DN311_c0_g1_i19	257	18	0.0504745	-0.539028	Nonsignificant	SA-E vs SA
TRINITY_DN311_c0_g1_i4	3726.02	250.92	8.5105e-05	-0.570022	Downregulated	SA-E vs SA
TRINITY_DN311_c0_g1_i5	17983.9	1704.59	0.0583772	-0.300157	Nonsignificant	SA-E vs SA
TRINITY_DN311_c0_g2_i1	103	1	0.000205848	-2.09913	Downregulated	SA-E vs SA
TRINITY_DN311_c0_g3_i1	1215	72	5.98788e-05	-0.670979	Downregulated	SA-E vs SA
TRINITY_DN311_c1_g1_i1	256	36	0.640478	0.0113024	Nonsignificant	SA-E vs SA
TRINITY_DN31106_c0_g1_i1	45	21	0.000218753	0.958343	Upregulated	SA-E vs SA
TRINITY_DN3116_c1_g1_i1	35	2	0.407173	-0.699691	Nonsignificant	SA-E vs SA
TRINITY_DN31185_c0_g1_i2	63	152	1.17683e-43	2.25543	Upregulated	SA-E vs SA
TRINITY_DN3121_c0_g1_i1	402	69	0.107708	0.168663	Nonsignificant	SA-E vs SA
TRINITY_DN3122_c1_g1_i1	92	4	0.0438256	-0.915461	Downregulated	SA-E vs SA
TRINITY_DN31223_c0_g1_i1	19	6	0.186747	0.650006	Nonsignificant	SA-E vs SA
TRINITY_DN31238_c0_g1_i1	324	53	0.199035	0.130683	Nonsignificant	SA-E vs SA
TRINITY_DN3128_c0_g1_i2	263	32	0.957633	-0.102988	Nonsignificant	SA-E vs SA
TRINITY_DN31292_c0_g1_i1	14	4	0.282135	0.570988	Nonsignificant	SA-E vs SA
TRINITY_DN31297_c0_g1_i1	80	10	1	-0.0816894	Nonsignificant	SA-E vs SA
TRINITY_DN313_c0_g1_i1	21	2	1	-0.296386	Nonsignificant	SA-E vs SA
TRINITY_DN31322_c0_g1_i1	64	14	0.150804	0.360137	Nonsignificant	SA-E vs SA
TRINITY_DN31340_c0_g1_i1	738	68	0.119451	-0.322488	Nonsignificant	SA-E vs SA
TRINITY_DN31369_c0_g1_i1	81	3	0.0387935	-1.04205	Downregulated	SA-E vs SA
TRINITY_DN3139_c0_g1_i1	27	7	0.257411	0.494275	Nonsignificant	SA-E vs SA
TRINITY_DN31461_c0_g1_i1	169	28	0.282167	0.140755	Nonsignificant	SA-E vs SA
TRINITY_DN31490_c0_g1_i1	58	13	0.132383	0.379348	Nonsignificant	SA-E vs SA
TRINITY_DN31493_c0_g1_i1	75	16	0.130311	0.340341	Nonsignificant	SA-E vs SA
TRINITY_DN3150_c0_g1_i1	115	33	0.00212081	0.574413	Upregulated	SA-E vs SA
TRINITY_DN3150_c1_g1_i1	130	5	0.00921389	-1.01226	Downregulated	SA-E vs SA
TRINITY_DN31559_c0_g1_i1	144	3	0.000282516	-1.49631	Downregulated	SA-E vs SA
TRINITY_DN3156_c0_g1_i1	353	31	0.151428	-0.36042	Nonsignificant	SA-E vs SA
TRINITY_DN31566_c0_g1_i1	215	40	0.102477	0.232288	Nonsignificant	SA-E vs SA
TRINITY_DN31605_c0_g1_i1	19	4	0.472	0.329884	Nonsignificant	SA-E vs SA
TRINITY_DN31618_c0_g1_i1	223	18	0.146902	-0.426992	Nonsignificant	SA-E vs SA
TRINITY_DN31664_c0_g1_i1	31	2	0.499675	-0.603875	Nonsignificant	SA-E vs SA
TRINITY_DN31692_c0_g1_i2	59	14	0.0857668	0.424361	Nonsignificant	SA-E vs SA
TRINITY_DN31719_c0_g1_i1	253	22	0.192353	-0.36821	Nonsignificant	SA-E vs SA
TRINITY_DN31853_c0_g1_i1	27	1	0.319467	-1.04205	Nonsignificant	SA-E vs SA
TRINITY_DN31861_c0_g1_i1	73	5	0.281069	-0.556647	Nonsignificant	SA-E vs SA
TRINITY_DN31863_c0_g1_i1	30	4	1	-0.030735	Nonsignificant	SA-E vs SA
TRINITY_DN31912_c0_g1_i1	276	40	0.525322	0.0350961	Nonsignificant	SA-E vs SA
TRINITY_DN3199_c0_g1_i1	193	10	0.0097493	-0.776989	Downregulated	SA-E vs SA
TRINITY_DN32077_c0_g1_i2	117	9	0.266072	-0.465006	Nonsignificant	SA-E vs SA
TRINITY_DN3211_c0_g2_i1	146	11	0.157493	-0.481398	Nonsignificant	SA-E vs SA
TRINITY_DN32130_c0_g1_i1	37	5	1	-0.0201373	Nonsignificant	SA-E vs SA
TRINITY_DN32139_c0_g1_i1	20	8	0.0452806	0.836639	Upregulated	SA-E vs SA
TRINITY_DN3216_c0_g1_i1	890	113	0.922632	-0.0693667	Nonsignificant	SA-E vs SA
TRINITY_DN3219_c0_g1_i1	269	12	0.000832786	-0.895179	Downregulated	SA-E vs SA
TRINITY_DN3219_c0_g2_i1	276	6	1.74099e-06	-1.46271	Downregulated	SA-E vs SA
TRINITY_DN3220_c0_g1_i2	56.9	40	2.43818e-09	1.28183	Upregulated	SA-E vs SA
TRINITY_DN3220_c0_g2_i2	23082.6	1569	2.91753e-05	-0.562662	Downregulated	SA-E vs SA
TRINITY_DN3220_c0_g3_i1	58	11	0.364482	0.247456	Nonsignificant	SA-E vs SA
TRINITY_DN3220_c1_g1_i1	686	52	0.0147143	-0.4766	Downregulated	SA-E vs SA
TRINITY_DN32209_c0_g1_i1	43	1	0.0654974	-1.40947	Nonsignificant	SA-E vs SA
TRINITY_DN3222_c0_g1_i1	1152	72	0.000194154	-0.628941	Downregulated	SA-E vs SA
TRINITY_DN3223_c0_g1_i1	336	29	0.134453	-0.374106	Nonsignificant	SA-E vs SA
TRINITY_DN32247_c0_g1_i1	15	6	0.0586286	0.836639	Nonsignificant	SA-E vs SA
TRINITY_DN3228_c0_g1_i1	114	21	0.22999	0.224458	Nonsignificant	SA-E vs SA
TRINITY_DN323_c0_g1_i1	65	19	0.0165779	0.589	Upregulated	SA-E vs SA
TRINITY_DN323_c0_g2_i1	626	134	0.00210712	0.343017	Upregulated	SA-E vs SA
TRINITY_DN323_c0_g4_i1	1381.46	67.42	3.83223e-07	-0.824241	Downregulated	SA-E vs SA
TRINITY_DN323_c0_g4_i2	3440.89	805.64	2.01321e-05	0.413806	Upregulated	SA-E vs SA
TRINITY_DN323_c0_g4_i3	48.65	17.94	0.00349787	0.772429	Upregulated	SA-E vs SA
TRINITY_DN323_c0_g5_i1	246	11	0.00171123	-0.893309	Downregulated	SA-E vs SA
TRINITY_DN323_c2_g1_i1	327	37	0.712938	-0.160326	Nonsignificant	SA-E vs SA
TRINITY_DN3230_c0_g1_i1	775	58	0.00991348	-0.486695	Downregulated	SA-E vs SA
TRINITY_DN32310_c0_g1_i1	19	2	1	-0.217368	Nonsignificant	SA-E vs SA
TRINITY_DN32393_c0_g1_i1	65	26	0.000267908	0.836639	Upregulated	SA-E vs SA
TRINITY_DN324_c0_g1_i1	71.17	8.71	1	-0.098394	Nonsignificant	SA-E vs SA
TRINITY_DN324_c0_g1_i2	671.83	55.29	0.0373484	-0.411685	Downregulated	SA-E vs SA
TRINITY_DN324_c0_g2_i1	75	26	0.000896798	0.723658	Upregulated	SA-E vs SA
TRINITY_DN324_c0_g2_i4	212.37	14	0.048368	-0.586847	Downregulated	SA-E vs SA
TRINITY_DN324_c0_g2_i5	89.63	9	0.647852	-0.254613	Nonsignificant	SA-E vs SA
TRINITY_DN324_c0_g2_i8	305	14	0.000681585	-0.872638	Downregulated	SA-E vs SA
TRINITY_DN324_c0_g3_i1	1230	134	0.430544	-0.190239	Nonsignificant	SA-E vs SA
TRINITY_DN324_c0_g4_i1	486	32	0.00570918	-0.587795	Downregulated	SA-E vs SA
TRINITY_DN324_c1_g1_i1	15	18	1.61919e-07	1.70401	Upregulated	SA-E vs SA
TRINITY_DN32567_c0_g1_i1	14	3	0.780907	0.343858	Nonsignificant	SA-E vs SA
TRINITY_DN32688_c0_g1_i1	20	4	0.643095	0.289387	Nonsignificant	SA-E vs SA
TRINITY_DN32701_c0_g1_i1	180	38	0.0364278	0.332074	Upregulated	SA-E vs SA
TRINITY_DN32712_c0_g1_i1	33	12	0.0195301	0.76139	Upregulated	SA-E vs SA
TRINITY_DN3276_c0_g1_i1	42	5	1	-0.12021	Nonsignificant	SA-E vs SA
TRINITY_DN328_c0_g2_i1	989.6	43	2.2286e-07	-0.91594	Downregulated	SA-E vs SA
TRINITY_DN328_c0_g2_i2	14	6	0.0586286	0.89111	Nonsignificant	SA-E vs SA
TRINITY_DN328_c0_g3_i1	132.57	25	0.144855	0.242965	Nonsignificant	SA-E vs SA
TRINITY_DN328_c0_g4_i1	54	24	0.000159196	0.919823	Upregulated	SA-E vs SA
TRINITY_DN3281_c0_g1_i1	207	25	0.949416	-0.10885	Nonsignificant	SA-E vs SA
TRINITY_DN3281_c0_g2_i1	961	57	0.000137235	-0.67026	Downregulated	SA-E vs SA
TRINITY_DN3281_c0_g3_i1	29	15	0.000877812	1.03958	Upregulated	SA-E vs SA
TRINITY_DN329_c0_g1_i1	499.82	49.86	0.304334	-0.259795	Nonsignificant	SA-E vs SA
TRINITY_DN329_c0_g1_i2	30.18	0.14	0.0267805	-2.68224	Downregulated	SA-E vs SA
TRINITY_DN3293_c0_g1_i1	98	9	0.510322	-0.325099	Nonsignificant	SA-E vs SA
TRINITY_DN3298_c0_g1_i2	184.49	70	2.16614e-07	0.794945	Upregulated	SA-E vs SA
TRINITY_DN3298_c0_g2_i1	394	33	0.100623	-0.397814	Nonsignificant	SA-E vs SA
TRINITY_DN3308_c0_g1_i1	383	38	0.332204	-0.264074	Nonsignificant	SA-E vs SA
TRINITY_DN3308_c1_g1_i1	34	3	0.840383	-0.356683	Nonsignificant	SA-E vs SA
TRINITY_DN3315_c0_g2_i1	717	44	0.000667009	-0.643387	Downregulated	SA-E vs SA
TRINITY_DN33163_c0_g1_i1	34	3	0.840383	-0.356683	Nonsignificant	SA-E vs SA
TRINITY_DN332_c0_g3_i4	13	10	0.00148807	1.35292	Upregulated	SA-E vs SA
TRINITY_DN33251_c0_g1_i1	58	17	0.0266086	0.591147	Upregulated	SA-E vs SA
TRINITY_DN33263_c0_g1_i1	17	2	1	-0.129553	Nonsignificant	SA-E vs SA
TRINITY_DN3331_c0_g1_i1	636	97	0.263905	0.0753882	Nonsignificant	SA-E vs SA
TRINITY_DN3333_c0_g1_i1	116	4	0.00971496	-1.09847	Downregulated	SA-E vs SA
TRINITY_DN3333_c0_g2_i1	1179	123	0.311991	-0.224431	Nonsignificant	SA-E vs SA
TRINITY_DN3334_c0_g1_i1	184	14	0.131746	-0.473635	Nonsignificant	SA-E vs SA
TRINITY_DN334_c1_g1_i1	391.17	6	7.86789e-10	-1.73805	Downregulated	SA-E vs SA
TRINITY_DN334_c2_g1_i2	6564	873	0.654908	-0.0327222	Nonsignificant	SA-E vs SA
TRINITY_DN33455_c0_g1_i1	13	6	0.0884894	0.949619	Nonsignificant	SA-E vs SA
TRINITY_DN33457_c0_g1_i1	43	8	0.533661	0.232288	Nonsignificant	SA-E vs SA
TRINITY_DN335_c0_g1_i4	672	108	0.160153	0.116728	Nonsignificant	SA-E vs SA
TRINITY_DN335_c0_g1_i7	487.2	70	0.493573	0.0282604	Nonsignificant	SA-E vs SA
TRINITY_DN3352_c0_g1_i1	18	1	0.559728	-0.721932	Nonsignificant	SA-E vs SA
TRINITY_DN33580_c0_g1_i2	78.42	20	0.0356793	0.481311	Upregulated	SA-E vs SA
TRINITY_DN3364_c0_g2_i2	2	25	2.79657e-11	3.55417	Upregulated	SA-E vs SA
TRINITY_DN33715_c0_g1_i1	14	6	0.0586286	0.89111	Nonsignificant	SA-E vs SA
TRINITY_DN33873_c0_g1_i1	14	5	0.13207	0.747164	Nonsignificant	SA-E vs SA
TRINITY_DN339_c0_g1_i1	49	11	0.165414	0.380586	Nonsignificant	SA-E vs SA
TRINITY_DN339_c0_g2_i1	153	18	0.937522	-0.129554	Nonsignificant	SA-E vs SA
TRINITY_DN339_c0_g3_i2	740.01	70.41	0.150291	-0.297138	Nonsignificant	SA-E vs SA
TRINITY_DN339_c0_g3_i4	316.99	67.51	0.00831834	0.339003	Upregulated	SA-E vs SA
TRINITY_DN339_c1_g1_i1	30	3	0.832022	-0.257865	Nonsignificant	SA-E vs SA
TRINITY_DN3395_c0_g1_i1	28	8	0.146673	0.570988	Nonsignificant	SA-E vs SA
TRINITY_DN340_c0_g1_i1	712.42	12.33	1.01347e-13	-1.64272	Downregulated	SA-E vs SA
TRINITY_DN340_c0_g1_i3	58.58	31.34	2.88668e-06	1.06622	Upregulated	SA-E vs SA
TRINITY_DN340_c1_g1_i2	505.91	21.44	1.0473e-05	-0.935678	Downregulated	SA-E vs SA
TRINITY_DN340_c1_g2_i1	418	79	0.032358	0.244703	Upregulated	SA-E vs SA
TRINITY_DN340_c1_g3_i1	366	52	0.55418	0.0194098	Nonsignificant	SA-E vs SA
TRINITY_DN340_c1_g4_i1	54.17	10.29	0.406933	0.248713	Nonsignificant	SA-E vs SA
TRINITY_DN340_c1_g4_i2	282.83	4.71	2.89578e-07	-1.67313	Downregulated	SA-E vs SA
TRINITY_DN3401_c0_g1_i1	233.88	145.39	7.81339e-18	1.18474	Upregulated	SA-E vs SA
TRINITY_DN3401_c0_g1_i10	6320.88	644.45	0.174882	-0.242573	Nonsignificant	SA-E vs SA
TRINITY_DN3401_c0_g1_i3	142.67	0.01	2.89012e-08	-5.99215	Downregulated	SA-E vs SA
TRINITY_DN3401_c0_g1_i4	47.45	24.63	1.45728e-05	1.04237	Upregulated	SA-E vs SA
TRINITY_DN3401_c0_g1_i5	4366.18	26.19	4.6067e-49	-2.47932	Downregulated	SA-E vs SA
TRINITY_DN3401_c0_g1_i7	1961.81	274.33	0.468513	0.00685537	Nonsignificant	SA-E vs SA
TRINITY_DN3401_c0_g2_i1	247.14	26	0.564832	-0.217816	Nonsignificant	SA-E vs SA
TRINITY_DN3401_c0_g3_i1	45	9	0.36518	0.289387	Nonsignificant	SA-E vs SA
TRINITY_DN3401_c1_g1_i1	329	51	0.338193	0.0882222	Nonsignificant	SA-E vs SA
TRINITY_DN3401_c2_g1_i1	34	21	1.98164e-05	1.17965	Upregulated	SA-E vs SA
TRINITY_DN34126_c0_g1_i1	46	12	0.095186	0.499164	Nonsignificant	SA-E vs SA
TRINITY_DN3416_c0_g1_i1	38.18	3	0.564053	-0.448229	Nonsignificant	SA-E vs SA
TRINITY_DN3416_c0_g1_i3	1345.72	181	0.646869	-0.023854	Nonsignificant	SA-E vs SA
TRINITY_DN3416_c0_g2_i1	68	15	0.139951	0.366744	Nonsignificant	SA-E vs SA
TRINITY_DN34161_c0_g1_i1	36	22	9.1596e-06	1.17125	Upregulated	SA-E vs SA
TRINITY_DN3417_c0_g1_i1	897	114	0.923057	-0.068596	Nonsignificant	SA-E vs SA
TRINITY_DN3421_c0_g1_i1	14	6	0.0586286	0.89111	Nonsignificant	SA-E vs SA
TRINITY_DN3421_c0_g2_i4	7065.99	883.52	0.977126	-0.081447	Nonsignificant	SA-E vs SA
TRINITY_DN3421_c0_g2_i5	0.18	31.48	1.49345e-13	5.63725	Upregulated	SA-E vs SA
TRINITY_DN3421_c0_g3_i1	44	4	0.729435	-0.333114	Nonsignificant	SA-E vs SA
TRINITY_DN3423_c0_g1_i1	215	9	0.00212081	-0.945399	Downregulated	SA-E vs SA
TRINITY_DN34306_c0_g1_i1	34	4	1	-0.129553	Nonsignificant	SA-E vs SA
TRINITY_DN3431_c0_g1_i1	1698	88	7.60659e-07	-0.776803	Downregulated	SA-E vs SA
TRINITY_DN3431_c0_g2_i1	145	35	0.0107801	0.437857	Upregulated	SA-E vs SA
TRINITY_DN3431_c0_g3_i1	82	7	0.464237	-0.382786	Nonsignificant	SA-E vs SA
TRINITY_DN3437_c0_g1_i2	80.35	9.04	0.904123	-0.164819	Nonsignificant	SA-E vs SA
TRINITY_DN3437_c0_g1_i3	812.74	47.96	0.000224887	-0.674303	Downregulated	SA-E vs SA
TRINITY_DN3437_c0_g2_i1	411	14	3.28491e-06	-1.10814	Downregulated	SA-E vs SA
TRINITY_DN3437_c1_g1_i1	240.5	28	0.863541	-0.137804	Nonsignificant	SA-E vs SA
TRINITY_DN3437_c1_g1_i4	100	11	0.753783	-0.182616	Nonsignificant	SA-E vs SA
TRINITY_DN344_c0_g1_i3	23	19	3.55231e-06	1.40922	Upregulated	SA-E vs SA
TRINITY_DN3441_c0_g1_i1	341.24	32.84	0.3077	-0.288146	Nonsignificant	SA-E vs SA
TRINITY_DN3441_c0_g1_i2	65874.8	9714.16	0.234662	0.0487948	Nonsignificant	SA-E vs SA
TRINITY_DN3441_c1_g1_i3	3889	426	0.397591	-0.185927	Nonsignificant	SA-E vs SA
TRINITY_DN3441_c1_g2_i1	98	21	0.100817	0.343858	Nonsignificant	SA-E vs SA
TRINITY_DN3441_c1_g3_i1	505	70	0.602587	-7.03885e-05	Nonsignificant	SA-E vs SA
TRINITY_DN34484_c0_g1_i1	117	7	0.0954667	-0.663423	Nonsignificant	SA-E vs SA
TRINITY_DN3452_c0_g1_i1	13	6	0.0884894	0.949619	Nonsignificant	SA-E vs SA
TRINITY_DN34580_c0_g1_i1	45	2	0.195373	-0.898108	Nonsignificant	SA-E vs SA
TRINITY_DN346_c0_g1_i2	2136	309	0.335841	0.0336533	Nonsignificant	SA-E vs SA
TRINITY_DN3487_c0_g1_i4	965.63	94	0.175119	-0.279104	Nonsignificant	SA-E vs SA
TRINITY_DN350_c0_g1_i1	1186	124	0.314238	-0.222712	Nonsignificant	SA-E vs SA
TRINITY_DN350_c0_g2_i1	677	35	5.76956e-05	-0.77874	Downregulated	SA-E vs SA
TRINITY_DN35121_c0_g1_i1	60	15	0.0749032	0.465562	Nonsignificant	SA-E vs SA
TRINITY_DN352_c0_g1_i1	18	6	0.186747	0.692693	Nonsignificant	SA-E vs SA
TRINITY_DN3533_c1_g1_i1	21	7	0.0938808	0.692693	Nonsignificant	SA-E vs SA
TRINITY_DN3533_c1_g2_i1	19	1	0.559728	-0.764619	Nonsignificant	SA-E vs SA
TRINITY_DN3551_c0_g2_i1	24	3	1	-0.0816892	Nonsignificant	SA-E vs SA
TRINITY_DN3554_c0_g2_i1	91	4	0.0438256	-0.906833	Downregulated	SA-E vs SA
TRINITY_DN35673_c0_g1_i1	36	4	1	-0.174681	Nonsignificant	SA-E vs SA
TRINITY_DN35680_c0_g1_i1	21	1	0.401742	-0.843637	Nonsignificant	SA-E vs SA
TRINITY_DN35687_c0_g1_i1	200	6	0.00031911	-1.20842	Downregulated	SA-E vs SA
TRINITY_DN3569_c0_g1_i1	913	43	1.92925e-06	-0.852333	Downregulated	SA-E vs SA
TRINITY_DN35698_c0_g1_i1	15	1	1	-0.577986	Nonsignificant	SA-E vs SA
TRINITY_DN35705_c0_g1_i1	43	1	0.0654974	-1.40947	Nonsignificant	SA-E vs SA
TRINITY_DN35711_c0_g1_i1	37	29	4.07372e-08	1.36772	Upregulated	SA-E vs SA
TRINITY_DN358_c1_g1_i1	398.87	48	0.907472	-0.111686	Nonsignificant	SA-E vs SA
TRINITY_DN35806_c0_g1_i1	814	64	0.0178062	-0.447738	Downregulated	SA-E vs SA
TRINITY_DN35867_c0_g1_i1	2088	155	0.00166323	-0.493103	Downregulated	SA-E vs SA
TRINITY_DN3588_c0_g1_i1	89	9	0.647852	-0.249044	Nonsignificant	SA-E vs SA
TRINITY_DN35888_c0_g1_i1	18	1	0.559728	-0.721932	Nonsignificant	SA-E vs SA
TRINITY_DN359_c0_g3_i1	29	5	0.694067	0.172207	Nonsignificant	SA-E vs SA
TRINITY_DN35917_c0_g1_i1	662	44	0.00267023	-0.580376	Downregulated	SA-E vs SA
TRINITY_DN35926_c0_g1_i1	3664	487	0.667045	-0.033217	Nonsignificant	SA-E vs SA
TRINITY_DN35974_c0_g1_i1	232	39	0.220729	0.152218	Nonsignificant	SA-E vs SA
TRINITY_DN36_c2_g1_i1	15	8	0.0161862	1.06377	Upregulated	SA-E vs SA
TRINITY_DN360_c0_g2_i1	42	34	2.8254e-09	1.39323	Upregulated	SA-E vs SA
TRINITY_DN36003_c0_g1_i1	17	4	0.472	0.417698	Nonsignificant	SA-E vs SA
TRINITY_DN36038_c0_g1_i1	43	6	0.870082	0.00515833	Nonsignificant	SA-E vs SA
TRINITY_DN36056_c0_g1_i1	345	33	0.287829	-0.292961	Nonsignificant	SA-E vs SA
TRINITY_DN36066_c0_g1_i1	2906	1651	5.57906e-24	1.11368	Upregulated	SA-E vs SA
TRINITY_DN36076_c0_g1_i1	45	6	1	-0.030735	Nonsignificant	SA-E vs SA
TRINITY_DN36079_c0_g1_i1	141	50	9.52755e-06	0.741544	Upregulated	SA-E vs SA
TRINITY_DN36108_c0_g1_i1	1432	121	0.0235848	-0.390861	Downregulated	SA-E vs SA
TRINITY_DN36121_c0_g1_i1	148	10	0.0902871	-0.567389	Nonsignificant	SA-E vs SA
TRINITY_DN36124_c0_g1_i1	74	15	0.186636	0.299984	Nonsignificant	SA-E vs SA
TRINITY_DN36169_c0_g1_i1	51	10	0.326216	0.273752	Nonsignificant	SA-E vs SA
TRINITY_DN362_c0_g1_i1	98	2	0.00297647	-1.51259	Downregulated	SA-E vs SA
TRINITY_DN36207_c0_g1_i1	190	21	0.730399	-0.178847	Nonsignificant	SA-E vs SA
TRINITY_DN36226_c0_g1_i1	37	30	1.88715e-08	1.39449	Upregulated	SA-E vs SA
TRINITY_DN36301_c0_g1_i1	51	13	0.0903745	0.480893	Nonsignificant	SA-E vs SA
TRINITY_DN36306_c0_g1_i1	744	77	0.341223	-0.230746	Nonsignificant	SA-E vs SA
TRINITY_DN36389_c0_g1_i1	163	17	0.644287	-0.224667	Nonsignificant	SA-E vs SA
TRINITY_DN364_c0_g1_i11	5374.39	1031.28	0.00315337	0.256696	Upregulated	SA-E vs SA
TRINITY_DN364_c0_g1_i4	120.57	7.36	0.0789874	-0.647559	Nonsignificant	SA-E vs SA
TRINITY_DN364_c0_g1_i5	1343.6	0.01	2.43569e-41	-7.7627	Downregulated	SA-E vs SA
TRINITY_DN364_c0_g1_i9	354.44	22.35	0.00796422	-0.621934	Downregulated	SA-E vs SA
TRINITY_DN36449_c0_g1_i1	149	12	0.22999	-0.42876	Nonsignificant	SA-E vs SA
TRINITY_DN36518_c0_g1_i1	16	5	0.227948	0.641738	Nonsignificant	SA-E vs SA
TRINITY_DN36542_c0_g1_i1	20	3	1	0.0622569	Nonsignificant	SA-E vs SA
TRINITY_DN3658_c1_g1_i1	128	12	0.460804	-0.308819	Nonsignificant	SA-E vs SA
TRINITY_DN366_c0_g1_i26	2707.51	418	0.158137	0.085008	Nonsignificant	SA-E vs SA
TRINITY_DN3662_c1_g1_i3	512	111	0.00252813	0.353056	Upregulated	SA-E vs SA
TRINITY_DN3662_c1_g2_i1	1778.34	257	0.352424	0.0328554	Nonsignificant	SA-E vs SA
TRINITY_DN3662_c1_g3_i1	217.89	25	0.804367	-0.14933	Nonsignificant	SA-E vs SA
TRINITY_DN3662_c2_g1_i1	182	3.58	8.45295e-05	-1.54167	Downregulated	SA-E vs SA
TRINITY_DN3662_c2_g2_i1	213	20.42	0.35694	-0.291177	Nonsignificant	SA-E vs SA
TRINITY_DN36669_c0_g1_i1	312	59	0.0508277	0.245152	Nonsignificant	SA-E vs SA
TRINITY_DN3672_c0_g1_i5	45.86	1	0.0798343	-1.46031	Nonsignificant	SA-E vs SA
TRINITY_DN36776_c0_g1_i1	23	2	1	-0.368209	Nonsignificant	SA-E vs SA
TRINITY_DN3678_c0_g1_i1	315	52	0.190744	0.137885	Nonsignificant	SA-E vs SA
TRINITY_DN3678_c0_g2_i1	6056	305	4.25726e-09	-0.799401	Downregulated	SA-E vs SA
TRINITY_DN3678_c0_g2_i3	88	8	0.483809	-0.333114	Nonsignificant	SA-E vs SA
TRINITY_DN3678_c0_g3_i1	46	3	0.376638	-0.595339	Nonsignificant	SA-E vs SA
TRINITY_DN368_c0_g1_i1	315.95	28.36	0.19147	-0.343148	Nonsignificant	SA-E vs SA
TRINITY_DN368_c0_g1_i2	82.05	0.64	0.0018476	-2.27195	Downregulated	SA-E vs SA
TRINITY_DN36821_c0_g1_i1	14	3	0.780907	0.343858	Nonsignificant	SA-E vs SA
TRINITY_DN36845_c0_g1_i1	2007	153	0.0030046	-0.472119	Downregulated	SA-E vs SA
TRINITY_DN36947_c0_g1_i1	118	13	0.777217	-0.1814	Nonsignificant	SA-E vs SA
TRINITY_DN36952_c0_g1_i1	22	4	0.643095	0.214138	Nonsignificant	SA-E vs SA
TRINITY_DN37_c0_g1_i1	71.5	6.45	0.506904	-0.339211	Nonsignificant	SA-E vs SA
TRINITY_DN37_c0_g2_i3	14.3	10.18	0.000910749	1.29176	Upregulated	SA-E vs SA
TRINITY_DN37_c2_g1_i1	24	5	0.523805	0.321616	Nonsignificant	SA-E vs SA
TRINITY_DN370_c0_g1_i2	584.34	161	4.06848e-06	0.542316	Upregulated	SA-E vs SA
TRINITY_DN370_c0_g2_i1	86	3	0.0222191	-1.08935	Downregulated	SA-E vs SA
TRINITY_DN370_c0_g3_i1	84	2	0.0114183	-1.39089	Downregulated	SA-E vs SA
TRINITY_DN371_c0_g1_i1	1896.63	228	0.833894	-0.112518	Nonsignificant	SA-E vs SA
TRINITY_DN37177_c0_g1_i1	181	6	0.00108016	-1.12961	Downregulated	SA-E vs SA
TRINITY_DN37183_c0_g1_i1	171	26	0.492796	0.072957	Nonsignificant	SA-E vs SA
TRINITY_DN37194_c0_g1_i1	133	10	0.18877	-0.483019	Nonsignificant	SA-E vs SA
TRINITY_DN37196_c0_g1_i1	9	13	4.812e-06	1.85039	Upregulated	SA-E vs SA
TRINITY_DN372_c0_g1_i1	3053	447	0.285284	0.0431492	Nonsignificant	SA-E vs SA
TRINITY_DN372_c0_g2_i1	485	45	0.185435	-0.317001	Nonsignificant	SA-E vs SA
TRINITY_DN373_c0_g1_i2	1072.56	122	0.606511	-0.156173	Nonsignificant	SA-E vs SA
TRINITY_DN373_c0_g2_i1	2000.14	255.15	0.882091	-0.0656459	Nonsignificant	SA-E vs SA
TRINITY_DN373_c0_g2_i2	175.49	22.04	1	-0.0779641	Nonsignificant	SA-E vs SA
TRINITY_DN373_c0_g3_i1	429	61	0.531904	0.0200466	Nonsignificant	SA-E vs SA
TRINITY_DN373_c0_g4_i1	64.94	1	0.0120982	-1.73496	Downregulated	SA-E vs SA
TRINITY_DN373_c0_g4_i3	22.93	3	1	-0.0456811	Nonsignificant	SA-E vs SA
TRINITY_DN373_c1_g1_i1	74	9	1	-0.103321	Nonsignificant	SA-E vs SA
TRINITY_DN37312_c0_g1_i1	42	1	0.0654974	-1.39089	Nonsignificant	SA-E vs SA
TRINITY_DN37334_c0_g1_i1	133	24	0.244497	0.208179	Nonsignificant	SA-E vs SA
TRINITY_DN3738_c0_g1_i1	111	4	0.0107729	-1.06369	Downregulated	SA-E vs SA
TRINITY_DN3738_c0_g2_i1	252	32	1	-0.0692558	Nonsignificant	SA-E vs SA
TRINITY_DN374_c0_g1_i1	110.86	29.19	0.00883442	0.506501	Upregulated	SA-E vs SA
TRINITY_DN374_c0_g1_i2	4177.14	658.81	0.110838	0.101869	Nonsignificant	SA-E vs SA
TRINITY_DN374_c0_g2_i1	225	48	0.0179884	0.340341	Upregulated	SA-E vs SA
TRINITY_DN374_c0_g3_i2	218.69	17	0.12333	-0.45671	Nonsignificant	SA-E vs SA
TRINITY_DN37461_c0_g1_i1	15	6	0.0586286	0.836639	Nonsignificant	SA-E vs SA
TRINITY_DN3753_c0_g1_i1	274	38	0.655504	0.000341148	Nonsignificant	SA-E vs SA
TRINITY_DN3753_c1_g2_i1	46	6	1	-0.0480877	Nonsignificant	SA-E vs SA
TRINITY_DN376_c0_g1_i2	212.29	7.43	0.000438362	-1.08673	Downregulated	SA-E vs SA
TRINITY_DN376_c0_g1_i4	298.67	68.57	0.00267063	0.398304	Upregulated	SA-E vs SA
TRINITY_DN376_c0_g2_i1	58	4	0.349715	-0.551221	Nonsignificant	SA-E vs SA
TRINITY_DN376_c0_g3_i1	59	2	0.068727	-1.11197	Nonsignificant	SA-E vs SA
TRINITY_DN37613_c0_g1_i1	211	16	0.111503	-0.476312	Nonsignificant	SA-E vs SA
TRINITY_DN3764_c0_g1_i1	59	2	0.068727	-1.11197	Nonsignificant	SA-E vs SA
TRINITY_DN3766_c0_g1_i1	37	3	0.694067	-0.423443	Nonsignificant	SA-E vs SA
TRINITY_DN3766_c0_g2_i1	28	4	1	0.0237361	Nonsignificant	SA-E vs SA
TRINITY_DN3777_c0_g1_i1	277	65	0.00253521	0.415558	Upregulated	SA-E vs SA
TRINITY_DN3779_c0_g2_i1	22	2	0.797512	-0.333114	Nonsignificant	SA-E vs SA
TRINITY_DN379_c0_g1_i3	214.01	10	0.00393896	-0.858572	Downregulated	SA-E vs SA
TRINITY_DN37914_c0_g1_i1	21	8	0.0452806	0.798118	Upregulated	SA-E vs SA
TRINITY_DN38_c0_g1_i1	30	59	2.72011e-22	2.09405	Upregulated	SA-E vs SA
TRINITY_DN3812_c0_g1_i1	33	20	4.27605e-05	1.1647	Upregulated	SA-E vs SA
TRINITY_DN3816_c0_g1_i1	102	27	0.00952847	0.51069	Upregulated	SA-E vs SA
TRINITY_DN382_c0_g2_i9	177	3	2.75569e-05	-1.65922	Downregulated	SA-E vs SA
TRINITY_DN38206_c0_g1_i1	106	12	0.84152	-0.159923	Nonsignificant	SA-E vs SA
TRINITY_DN38225_c0_g1_i1	45	7	0.755864	0.0909696	Nonsignificant	SA-E vs SA
TRINITY_DN38278_c0_g1_i1	140	11	0.209717	-0.448267	Nonsignificant	SA-E vs SA
TRINITY_DN383_c0_g2_i1	652.55	85.01	0.820786	-0.0490644	Nonsignificant	SA-E vs SA
TRINITY_DN383_c0_g2_i3	142.47	34.99	0.00847783	0.451529	Upregulated	SA-E vs SA
TRINITY_DN38347_c0_g1_i1	85	18	0.135292	0.334514	Nonsignificant	SA-E vs SA
TRINITY_DN38375_c0_g1_i1	26	2	0.81105	-0.465006	Nonsignificant	SA-E vs SA
TRINITY_DN384_c0_g2_i1	18	19	3.36881e-07	1.60275	Upregulated	SA-E vs SA
TRINITY_DN38454_c0_g1_i1	53	9	0.570099	0.160198	Nonsignificant	SA-E vs SA
TRINITY_DN386_c0_g1_i4	328.74	42.68	0.860659	-0.0517629	Nonsignificant	SA-E vs SA
TRINITY_DN386_c0_g1_i5	472.49	39.01	0.0700807	-0.409147	Nonsignificant	SA-E vs SA
TRINITY_DN386_c0_g1_i6	92.77	1.31	0.000878105	-1.80335	Downregulated	SA-E vs SA
TRINITY_DN386_c1_g1_i1	22	7	0.111707	0.655964	Nonsignificant	SA-E vs SA
TRINITY_DN38607_c0_g1_i1	18	9	0.0101133	1.01281	Upregulated	SA-E vs SA
TRINITY_DN3864_c0_g1_i1	133	10	0.18877	-0.483019	Nonsignificant	SA-E vs SA
TRINITY_DN3871_c0_g1_i1	623	91	0.392546	0.0412815	Nonsignificant	SA-E vs SA
TRINITY_DN3871_c0_g2_i1	1209.09	105.85	0.0469687	-0.362883	Downregulated	SA-E vs SA
TRINITY_DN3871_c0_g2_i4	3986.84	676.37	0.0374538	0.159451	Upregulated	SA-E vs SA
TRINITY_DN3871_c0_g2_i6	1586.76	164.78	0.276796	-0.228063	Nonsignificant	SA-E vs SA
TRINITY_DN3874_c0_g1_i1	36.55	11.29	0.0678932	0.63257	Nonsignificant	SA-E vs SA
TRINITY_DN3874_c0_g1_i2	858.45	136.71	0.148097	0.109512	Nonsignificant	SA-E vs SA
TRINITY_DN3874_c0_g2_i1	94	5	0.0857668	-0.756265	Nonsignificant	SA-E vs SA
TRINITY_DN3874_c0_g3_i1	121	26	0.0697735	0.34603	Nonsignificant	SA-E vs SA
TRINITY_DN3875_c0_g1_i1	36.84	5	1	-0.0167157	Nonsignificant	SA-E vs SA
TRINITY_DN3875_c0_g1_i4	3646.01	203.25	4.2181e-07	-0.719233	Downregulated	SA-E vs SA
TRINITY_DN3875_c0_g1_i6	2405.15	258.75	0.356847	-0.200167	Nonsignificant	SA-E vs SA
TRINITY_DN3875_c0_g2_i1	38	8	0.333362	0.329884	Nonsignificant	SA-E vs SA
TRINITY_DN3875_c0_g3_i1	105	23	0.0687827	0.361211	Nonsignificant	SA-E vs SA
TRINITY_DN388_c0_g1_i1	6096.2	631	0.211994	-0.23065	Nonsignificant	SA-E vs SA
TRINITY_DN388_c0_g1_i5	207.61	19	0.282167	-0.327846	Nonsignificant	SA-E vs SA
TRINITY_DN388_c0_g2_i1	95.57	5	0.0930976	-0.769343	Nonsignificant	SA-E vs SA
TRINITY_DN388_c1_g2_i1	10	13	4.812e-06	1.76721	Upregulated	SA-E vs SA
TRINITY_DN3882_c0_g1_i1	192.43	24	1	-0.0834556	Nonsignificant	SA-E vs SA
TRINITY_DN3882_c0_g2_i1	4532.7	218.27	1.79546e-09	-0.834809	Downregulated	SA-E vs SA
TRINITY_DN3882_c0_g2_i3	395.3	124.73	3.01536e-07	0.649363	Upregulated	SA-E vs SA
TRINITY_DN3882_c0_g3_i1	103	10	0.601004	-0.281202	Nonsignificant	SA-E vs SA
TRINITY_DN3882_c0_g4_i1	83	9	0.906204	-0.193939	Nonsignificant	SA-E vs SA
TRINITY_DN38823_c0_g1_i1	73	9	1	-0.0925794	Nonsignificant	SA-E vs SA
TRINITY_DN3885_c0_g1_i1	1733	119	0.000463228	-0.554645	Downregulated	SA-E vs SA
TRINITY_DN3885_c0_g2_i1	238	7	7.08083e-05	-1.22406	Downregulated	SA-E vs SA
TRINITY_DN38869_c0_g1_i1	35	3	0.694067	-0.37957	Nonsignificant	SA-E vs SA
TRINITY_DN3889_c0_g1_i1	465	55	0.835838	-0.12532	Nonsignificant	SA-E vs SA
TRINITY_DN38893_c0_g1_i1	37	36	8.0531e-11	1.53843	Upregulated	SA-E vs SA
TRINITY_DN389_c0_g1_i1	2657	301	0.545488	-0.159379	Nonsignificant	SA-E vs SA
TRINITY_DN3890_c1_g1_i1	124	4	0.00441553	-1.15113	Downregulated	SA-E vs SA
TRINITY_DN3890_c1_g1_i5	8488.48	585.53	7.09676e-05	-0.551063	Downregulated	SA-E vs SA
TRINITY_DN3890_c1_g1_i6	53.64	26.47	2.32146e-05	1.00244	Upregulated	SA-E vs SA
TRINITY_DN3890_c1_g2_i1	195	16	0.195977	-0.414052	Nonsignificant	SA-E vs SA
TRINITY_DN3891_c0_g1_i1	91	3	0.0197076	-1.13396	Downregulated	SA-E vs SA
TRINITY_DN38928_c0_g1_i2	17	2	1	-0.129553	Nonsignificant	SA-E vs SA
TRINITY_DN3899_c0_g1_i1	28	2	0.643095	-0.523516	Nonsignificant	SA-E vs SA
TRINITY_DN391_c0_g1_i1	2470.5	245	0.148252	-0.264444	Nonsignificant	SA-E vs SA
TRINITY_DN391_c0_g3_i1	28351	4142	0.26341	0.0414422	Nonsignificant	SA-E vs SA
TRINITY_DN391_c2_g1_i1	148	40	0.00232438	0.527114	Upregulated	SA-E vs SA
TRINITY_DN39119_c0_g1_i1	20	6	0.133184	0.609509	Nonsignificant	SA-E vs SA
TRINITY_DN392_c0_g1_i1	268	14	0.00390201	-0.770534	Downregulated	SA-E vs SA
TRINITY_DN39274_c0_g1_i1	97	6	0.159905	-0.637123	Nonsignificant	SA-E vs SA
TRINITY_DN39285_c0_g1_i1	60	1	0.0246357	-1.67249	Downregulated	SA-E vs SA
TRINITY_DN39300_c0_g1_i1	12	4	0.282135	0.692693	Nonsignificant	SA-E vs SA
TRINITY_DN39307_c0_g1_i1	50	11	0.218659	0.364636	Nonsignificant	SA-E vs SA
TRINITY_DN39468_c0_g1_i1	17	3	0.797512	0.190568	Nonsignificant	SA-E vs SA
TRINITY_DN39578_c0_g1_i1	24	13	0.00190528	1.07601	Upregulated	SA-E vs SA
TRINITY_DN3977_c0_g1_i1	136	5	0.00564883	-1.04788	Downregulated	SA-E vs SA
TRINITY_DN3977_c1_g1_i1	313	41	0.85505	-0.0447318	Nonsignificant	SA-E vs SA
TRINITY_DN399_c0_g1_i1	1506	118	0.00692736	-0.450462	Downregulated	SA-E vs SA
TRINITY_DN3991_c0_g1_i11	283.81	13.19	0.00111857	-0.862842	Downregulated	SA-E vs SA
TRINITY_DN3991_c0_g1_i2	3849.51	426.8	0.445203	-0.176387	Nonsignificant	SA-E vs SA
TRINITY_DN3991_c0_g1_i4	339.69	33.98	0.380165	-0.25761	Nonsignificant	SA-E vs SA
TRINITY_DN3991_c0_g1_i6	463.75	44.03	0.21039	-0.298833	Nonsignificant	SA-E vs SA
TRINITY_DN3991_c0_g1_i8	83	11	0.910059	-0.0355056	Nonsignificant	SA-E vs SA
TRINITY_DN39913_c0_g1_i1	12	6	0.0419754	1.01281	Upregulated	SA-E vs SA
TRINITY_DN400_c0_g1_i1	15146	1616	0.283685	-0.206702	Nonsignificant	SA-E vs SA
TRINITY_DN400_c0_g2_i1	32	4	1	-0.0816892	Nonsignificant	SA-E vs SA
TRINITY_DN400_c1_g1_i1	71	2	0.0324684	-1.25814	Downregulated	SA-E vs SA
TRINITY_DN4011_c0_g1_i1	318	21	0.0189102	-0.585471	Downregulated	SA-E vs SA
TRINITY_DN402_c0_g1_i4	81531	20535	8.81391e-07	0.471438	Upregulated	SA-E vs SA
TRINITY_DN402_c3_g1_i1	1196	83	0.00120244	-0.546286	Downregulated	SA-E vs SA
TRINITY_DN40462_c0_g1_i1	18	10	0.00662995	1.096	Upregulated	SA-E vs SA
TRINITY_DN40527_c0_g1_i1	56	10	0.419497	0.199912	Nonsignificant	SA-E vs SA
TRINITY_DN40591_c0_g1_i1	29	41	5.60708e-15	1.83346	Upregulated	SA-E vs SA
TRINITY_DN406_c0_g1_i3	66	26	0.000267908	0.824585	Upregulated	SA-E vs SA
TRINITY_DN406_c0_g1_i5	29	7	0.195373	0.437857	Nonsignificant	SA-E vs SA
TRINITY_DN40614_c0_g1_i1	1	20	3.99443e-09	3.92525	Upregulated	SA-E vs SA
TRINITY_DN40624_c0_g1_i1	116	21	0.26857	0.210727	Nonsignificant	SA-E vs SA
TRINITY_DN40701_c0_g1_i1	88	5	0.132383	-0.70419	Nonsignificant	SA-E vs SA
TRINITY_DN40710_c0_g1_i1	38.73	1.3	0.0938808	-1.11975	Nonsignificant	SA-E vs SA
TRINITY_DN40710_c0_g1_i2	1394.27	135.7	0.150074	-0.279257	Nonsignificant	SA-E vs SA
TRINITY_DN4072_c0_g1_i1	166	19	0.822855	-0.151252	Nonsignificant	SA-E vs SA
TRINITY_DN4072_c0_g2_i1	44	19	0.000820646	0.897068	Upregulated	SA-E vs SA
TRINITY_DN4072_c0_g3_i1	386	46	0.904774	-0.119392	Nonsignificant	SA-E vs SA
TRINITY_DN40727_c0_g1_i1	1131	330	6.98344e-08	0.587566	Upregulated	SA-E vs SA
TRINITY_DN40738_c0_g1_i1	162	25	0.437991	0.0846786	Nonsignificant	SA-E vs SA
TRINITY_DN4078_c0_g1_i2	18	2	1	-0.174681	Nonsignificant	SA-E vs SA
TRINITY_DN40848_c0_g1_i1	1914	198	0.250605	-0.231099	Nonsignificant	SA-E vs SA
TRINITY_DN4086_c0_g1_i1	92	2	0.00440277	-1.46271	Downregulated	SA-E vs SA
TRINITY_DN4086_c0_g2_i2	174	6	0.00145512	-1.09847	Downregulated	SA-E vs SA
TRINITY_DN4086_c0_g4_i1	625	57	0.127005	-0.330592	Nonsignificant	SA-E vs SA
TRINITY_DN40865_c0_g1_i2	32	0.69	0.160156	-1.46915	Nonsignificant	SA-E vs SA
TRINITY_DN4087_c0_g1_i1	1304.06	300.19	0.000102039	0.400405	Upregulated	SA-E vs SA
TRINITY_DN4087_c0_g1_i3	718.23	66.53	0.138426	-0.318304	Nonsignificant	SA-E vs SA
TRINITY_DN4087_c0_g2_i1	12392.7	558.28	1.08922e-11	-0.88744	Downregulated	SA-E vs SA
TRINITY_DN40879_c0_g1_i1	505	67	0.780012	-0.0346533	Nonsignificant	SA-E vs SA
TRINITY_DN409_c0_g1_i1	81	5	0.152795	-0.638749	Nonsignificant	SA-E vs SA
TRINITY_DN409_c0_g2_i1	395.01	81	0.0103028	0.309106	Upregulated	SA-E vs SA
TRINITY_DN409_c0_g3_i2	1650.49	156	0.0963229	-0.302383	Nonsignificant	SA-E vs SA
TRINITY_DN409_c0_g4_i1	56	9	0.580767	0.116728	Nonsignificant	SA-E vs SA
TRINITY_DN40931_c0_g1_i1	9806	965	0.106489	-0.270526	Nonsignificant	SA-E vs SA
TRINITY_DN40951_c0_g1_i1	6	16	3.94049e-08	2.33445	Upregulated	SA-E vs SA
TRINITY_DN40970_c0_g1_i1	59	22	0.00119594	0.781211	Upregulated	SA-E vs SA
TRINITY_DN40986_c0_g1_i1	156	23	0.557335	0.048644	Nonsignificant	SA-E vs SA
TRINITY_DN41_c0_g1_i1	302	67	0.00516736	0.371262	Upregulated	SA-E vs SA
TRINITY_DN41_c0_g2_i1	134.89	194.61	2.09279e-37	1.84945	Upregulated	SA-E vs SA
TRINITY_DN41_c0_g2_i2	1132.83	193.83	0.0518472	0.166179	Nonsignificant	SA-E vs SA
TRINITY_DN41_c0_g2_i5	170.07	19.95	0.9419	-0.131855	Nonsignificant	SA-E vs SA
TRINITY_DN41_c0_g2_i6	2784.21	493.62	0.0188356	0.194238	Upregulated	SA-E vs SA
TRINITY_DN41_c0_g4_i1	15.42	19	5.82615e-08	1.7249	Upregulated	SA-E vs SA
TRINITY_DN410_c0_g1_i1	17	7	0.0516117	0.859525	Nonsignificant	SA-E vs SA
TRINITY_DN41027_c0_g1_i1	121	13	0.780638	-0.201222	Nonsignificant	SA-E vs SA
TRINITY_DN4105_c0_g1_i2	252	66	0.00046271	0.502291	Upregulated	SA-E vs SA
TRINITY_DN41052_c0_g1_i1	19	11	0.00281319	1.12856	Upregulated	SA-E vs SA
TRINITY_DN41064_c0_g1_i1	33	2	0.523805	-0.653236	Nonsignificant	SA-E vs SA
TRINITY_DN4107_c0_g1_i3	44	6	0.870082	-0.0129923	Nonsignificant	SA-E vs SA
TRINITY_DN4107_c1_g1_i6	3236.39	391	0.847308	-0.108584	Nonsignificant	SA-E vs SA
TRINITY_DN4107_c1_g2_i1	1036	117	0.58201	-0.161831	Nonsignificant	SA-E vs SA
TRINITY_DN411_c1_g4_i1	18	14	0.000103608	1.36165	Upregulated	SA-E vs SA
TRINITY_DN4113_c0_g1_i1	220	18	0.164104	-0.416298	Nonsignificant	SA-E vs SA
TRINITY_DN41161_c0_g1_i1	113	7	0.108144	-0.635959	Nonsignificant	SA-E vs SA
TRINITY_DN41187_c0_g1_i1	95	16	0.431194	0.153708	Nonsignificant	SA-E vs SA
TRINITY_DN41218_c0_g1_i1	116	5	0.0210435	-0.922297	Downregulated	SA-E vs SA
TRINITY_DN4124_c0_g1_i1	241	22	0.273213	-0.329845	Nonsignificant	SA-E vs SA
TRINITY_DN4126_c0_g1_i1	82	15	0.290235	0.218937	Nonsignificant	SA-E vs SA
TRINITY_DN41315_c0_g1_i1	59	12	0.254598	0.302656	Nonsignificant	SA-E vs SA
TRINITY_DN41362_c0_g1_i1	36	10	0.117167	0.548746	Nonsignificant	SA-E vs SA
TRINITY_DN41441_c0_g1_i1	32	7	0.376638	0.360137	Nonsignificant	SA-E vs SA
TRINITY_DN41481_c0_g1_i1	301	18	0.00917158	-0.663798	Downregulated	SA-E vs SA
TRINITY_DN41597_c0_g1_i1	30	10	0.0425388	0.692693	Upregulated	SA-E vs SA
TRINITY_DN41643_c0_g1_i1	169	16	0.399794	-0.301071	Nonsignificant	SA-E vs SA
TRINITY_DN41701_c0_g1_i1	54	15	0.0340935	0.548746	Upregulated	SA-E vs SA
TRINITY_DN41760_c0_g1_i1	170	20	0.9419	-0.129554	Nonsignificant	SA-E vs SA
TRINITY_DN41783_c0_g1_i2	277.37	29	0.525218	-0.222709	Nonsignificant	SA-E vs SA
TRINITY_DN41793_c0_g1_i1	2075	476	5.85544e-05	0.397661	Upregulated	SA-E vs SA
TRINITY_DN418_c0_g2_i1	147	36	0.00996168	0.449283	Upregulated	SA-E vs SA
TRINITY_DN4180_c0_g1_i1	1712	206	0.834704	-0.11177	Nonsignificant	SA-E vs SA
TRINITY_DN4180_c0_g3_i1	83	33	4.91047e-05	0.831868	Upregulated	SA-E vs SA
TRINITY_DN41810_c0_g1_i1	16	5	0.227948	0.641738	Nonsignificant	SA-E vs SA
TRINITY_DN41894_c0_g1_i1	68	7	0.788187	-0.234979	Nonsignificant	SA-E vs SA
TRINITY_DN41948_c0_g1_i1	20	1	0.559728	-0.805116	Nonsignificant	SA-E vs SA
TRINITY_DN4195_c0_g1_i1	134	29	0.047591	0.351675	Upregulated	SA-E vs SA
TRINITY_DN4195_c0_g2_i1	32	14	0.00266073	0.907389	Upregulated	SA-E vs SA
TRINITY_DN41955_c0_g1_i1	16	6	0.11103	0.785684	Nonsignificant	SA-E vs SA
TRINITY_DN41979_c0_g1_i1	38	2	0.311691	-0.76462	Nonsignificant	SA-E vs SA
TRINITY_DN420_c0_g1_i1	41.32	10	0.129425	0.439929	Nonsignificant	SA-E vs SA
TRINITY_DN420_c0_g2_i1	1993.53	306.2	0.179815	0.0809653	Nonsignificant	SA-E vs SA
TRINITY_DN420_c0_g2_i4	1094.47	75.8	0.00151133	-0.547888	Downregulated	SA-E vs SA
TRINITY_DN420_c0_g3_i1	214	41	0.0733992	0.255464	Nonsignificant	SA-E vs SA
TRINITY_DN420_c0_g4_i1	264	22	0.147201	-0.401811	Nonsignificant	SA-E vs SA
TRINITY_DN4200_c0_g1_i1	286	27	0.312065	-0.303318	Nonsignificant	SA-E vs SA
TRINITY_DN4200_c0_g1_i2	191	30	0.380861	0.0986092	Nonsignificant	SA-E vs SA
TRINITY_DN4202_c0_g3_i1	31	7	0.278164	0.385203	Nonsignificant	SA-E vs SA
TRINITY_DN4204_c0_g1_i1	45	7	0.755864	0.0909696	Nonsignificant	SA-E vs SA
TRINITY_DN4205_c0_g2_i1	441	20	8.1078e-05	-0.882158	Downregulated	SA-E vs SA
TRINITY_DN4217_c0_g1_i1	3173	694	0.000153894	0.36003	Upregulated	SA-E vs SA
TRINITY_DN42175_c0_g1_i1	43	5	1	-0.138788	Nonsignificant	SA-E vs SA
TRINITY_DN4227_c0_g1_i2	84	12	0.739742	0.023736	Nonsignificant	SA-E vs SA
TRINITY_DN4227_c0_g1_i4	3232	275	0.0142234	-0.385372	Downregulated	SA-E vs SA
TRINITY_DN4227_c1_g1_i1	132	7	0.0475429	-0.758661	Downregulated	SA-E vs SA
TRINITY_DN42290_c0_g1_i1	62	1	0.0173117	-1.69838	Downregulated	SA-E vs SA
TRINITY_DN423_c0_g1_i2	543.1	108	0.00994875	0.284867	Upregulated	SA-E vs SA
TRINITY_DN4235_c0_g1_i1	112	11	0.620038	-0.272091	Nonsignificant	SA-E vs SA
TRINITY_DN4236_c0_g1_i1	981	120	0.942304	-0.0987739	Nonsignificant	SA-E vs SA
TRINITY_DN4236_c1_g1_i1	22	2	0.797512	-0.333114	Nonsignificant	SA-E vs SA
TRINITY_DN424_c0_g1_i1	2843.71	512.8	0.0138034	0.207639	Upregulated	SA-E vs SA
TRINITY_DN424_c0_g1_i2	22.84	3.99	0.82237	0.182578	Nonsignificant	SA-E vs SA
TRINITY_DN424_c0_g1_i3	1780.44	76.21	2.69799e-09	-0.927801	Downregulated	SA-E vs SA
TRINITY_DN424_c0_g2_i1	720	51	0.00545043	-0.530123	Downregulated	SA-E vs SA
TRINITY_DN4244_c0_g1_i1	456	96	0.00489702	0.329884	Upregulated	SA-E vs SA
TRINITY_DN425_c0_g1_i3	565.03	158.18	2.91802e-06	0.554896	Upregulated	SA-E vs SA
TRINITY_DN425_c0_g1_i5	829.49	26.82	2.50983e-09	-1.14929	Downregulated	SA-E vs SA
TRINITY_DN425_c0_g2_i1	260	17	0.0260671	-0.593318	Downregulated	SA-E vs SA
TRINITY_DN4254_c0_g1_i2	4600.9	475.15	0.211973	-0.232436	Nonsignificant	SA-E vs SA
TRINITY_DN4254_c0_g1_i5	121.83	14.85	1	-0.101574	Nonsignificant	SA-E vs SA
TRINITY_DN4254_c0_g2_i1	47	16	0.0112329	0.709315	Upregulated	SA-E vs SA
TRINITY_DN4254_c1_g1_i1	61	6	0.665796	-0.270915	Nonsignificant	SA-E vs SA
TRINITY_DN42562_c0_g1_i1	18	7	0.0516117	0.814397	Nonsignificant	SA-E vs SA
TRINITY_DN42586_c0_g1_i1	113	9	0.257543	-0.437542	Nonsignificant	SA-E vs SA
TRINITY_DN4260_c0_g1_i1	313	3	5.40176e-10	-2.10929	Downregulated	SA-E vs SA
TRINITY_DN4260_c0_g2_i1	169.61	23.87	0.674187	0.0119176	Nonsignificant	SA-E vs SA
TRINITY_DN4260_c0_g2_i2	669.39	61.13	0.113463	-0.329537	Nonsignificant	SA-E vs SA
TRINITY_DN42624_c0_g1_i1	108	9	0.345894	-0.401811	Nonsignificant	SA-E vs SA
TRINITY_DN4273_c0_g1_i1	8164.35	689.71	0.00855472	-0.391038	Downregulated	SA-E vs SA
TRINITY_DN4273_c0_g1_i2	4545.65	490.29	0.336365	-0.198133	Nonsignificant	SA-E vs SA
TRINITY_DN4273_c0_g3_i1	177	13	0.117687	-0.501522	Nonsignificant	SA-E vs SA
TRINITY_DN4273_c2_g1_i1	110	6	0.0773406	-0.73642	Nonsignificant	SA-E vs SA
TRINITY_DN42775_c0_g1_i1	132	10	0.18877	-0.47706	Nonsignificant	SA-E vs SA
TRINITY_DN428_c0_g1_i1	553	27	6.2224e-05	-0.823899	Downregulated	SA-E vs SA
TRINITY_DN42855_c0_g1_i1	19	5	0.258407	0.50606	Nonsignificant	SA-E vs SA
TRINITY_DN42871_c0_g1_i1	60	3	0.152171	-0.805117	Nonsignificant	SA-E vs SA
TRINITY_DN42875_c0_g1_i1	7	14	2.27396e-07	2.10732	Upregulated	SA-E vs SA
TRINITY_DN429_c0_g1_i1	82	4	0.0822399	-0.824612	Nonsignificant	SA-E vs SA
TRINITY_DN429_c0_g2_i1	124.07	26.17	0.0733973	0.331394	Nonsignificant	SA-E vs SA
TRINITY_DN429_c0_g2_i3	1874.2	300.83	0.102695	0.115729	Nonsignificant	SA-E vs SA
TRINITY_DN429_c0_g3_i1	207	28	0.806183	-0.0193749	Nonsignificant	SA-E vs SA
TRINITY_DN429_c1_g1_i1	152	32	0.049029	0.329884	Upregulated	SA-E vs SA
TRINITY_DN42961_c0_g1_i1	14	4	0.282135	0.570988	Nonsignificant	SA-E vs SA
TRINITY_DN43_c0_g1_i17	46	1.05	0.0798343	-1.42419	Nonsignificant	SA-E vs SA
TRINITY_DN43_c0_g3_i2	55	2	0.12358	-1.05654	Nonsignificant	SA-E vs SA
TRINITY_DN43058_c0_g1_i1	41	4	0.718867	-0.27736	Nonsignificant	SA-E vs SA
TRINITY_DN432_c0_g1_i6	72	6	0.506904	-0.401811	Nonsignificant	SA-E vs SA
TRINITY_DN43223_c0_g1_i1	14	2	1	0.0237363	Nonsignificant	SA-E vs SA
TRINITY_DN4327_c0_g2_i1	57	26	8.63371e-05	0.940331	Upregulated	SA-E vs SA
TRINITY_DN4327_c0_g3_i1	2801	456	0.0765936	0.126903	Nonsignificant	SA-E vs SA
TRINITY_DN4327_c0_g4_i1	4152	233	3.8832e-07	-0.713987	Downregulated	SA-E vs SA
TRINITY_DN43276_c0_g1_i1	79	8	0.711532	-0.247934	Nonsignificant	SA-E vs SA
TRINITY_DN433_c0_g1_i1	19	2	1	-0.217368	Nonsignificant	SA-E vs SA
TRINITY_DN435_c0_g1_i1	31	16	0.000883481	1.03788	Upregulated	SA-E vs SA
TRINITY_DN43508_c0_g1_i1	59	3	0.152171	-0.791847	Nonsignificant	SA-E vs SA
TRINITY_DN4351_c0_g1_i1	6035	452	0.00070877	-0.486086	Downregulated	SA-E vs SA
TRINITY_DN4351_c0_g2_i1	518	88	0.101267	0.160537	Nonsignificant	SA-E vs SA
TRINITY_DN43519_c0_g1_i1	14	5	0.13207	0.747164	Nonsignificant	SA-E vs SA
TRINITY_DN43552_c0_g1_i1	35	10	0.0790364	0.570988	Nonsignificant	SA-E vs SA
TRINITY_DN43579_c0_g1_i1	342	35	0.410614	-0.23961	Nonsignificant	SA-E vs SA
TRINITY_DN436_c0_g1_i2	119.18	3	0.00299889	-1.34696	Downregulated	SA-E vs SA
TRINITY_DN436_c0_g1_i5	29.24	2	0.499675	-0.557728	Nonsignificant	SA-E vs SA
TRINITY_DN43679_c0_g1_i1	58	3	0.195974	-0.778351	Nonsignificant	SA-E vs SA
TRINITY_DN437_c0_g1_i1	62	8	1	-0.0566232	Nonsignificant	SA-E vs SA
TRINITY_DN4370_c0_g1_i1	1490	113	0.00398973	-0.476213	Downregulated	SA-E vs SA
TRINITY_DN43731_c0_g1_i1	13	9	0.0024261	1.26974	Upregulated	SA-E vs SA
TRINITY_DN43788_c0_g1_i1	52	33	1.43189e-07	1.20104	Upregulated	SA-E vs SA
TRINITY_DN439_c0_g2_i3	1000.71	120.79	0.872436	-0.109299	Nonsignificant	SA-E vs SA
TRINITY_DN439_c0_g2_i6	3993.99	395.44	0.128835	-0.26573	Nonsignificant	SA-E vs SA
TRINITY_DN439_c0_g2_i7	588.02	126.77	0.0018895	0.348641	Upregulated	SA-E vs SA
TRINITY_DN439_c0_g3_i1	437	10	1.4456e-08	-1.42222	Downregulated	SA-E vs SA
TRINITY_DN43923_c0_g1_i1	30	2	0.499675	-0.577987	Nonsignificant	SA-E vs SA
TRINITY_DN44002_c0_g1_i1	30	2	0.499675	-0.577987	Nonsignificant	SA-E vs SA
TRINITY_DN44185_c0_g1_i1	17	3	0.797512	0.190568	Nonsignificant	SA-E vs SA
TRINITY_DN4425_c0_g1_i1	15	2	1	-0.0307348	Nonsignificant	SA-E vs SA
TRINITY_DN443_c0_g5_i2	15	5	0.227948	0.692693	Nonsignificant	SA-E vs SA
TRINITY_DN444_c0_g1_i1	187	34	0.143447	0.214138	Nonsignificant	SA-E vs SA
TRINITY_DN444_c0_g2_i3	240	38	0.315949	0.104944	Nonsignificant	SA-E vs SA
TRINITY_DN4441_c0_g1_i1	184	16	0.267685	-0.36821	Nonsignificant	SA-E vs SA
TRINITY_DN445_c0_g1_i1	62814	6593	0.229363	-0.21964	Nonsignificant	SA-E vs SA
TRINITY_DN445_c2_g1_i1	138	2	8.41695e-05	-1.78283	Downregulated	SA-E vs SA
TRINITY_DN445_c2_g2_i1	283	28	0.39672	-0.266279	Nonsignificant	SA-E vs SA
TRINITY_DN4459_c0_g1_i1	4106	460	0.48398	-0.16817	Nonsignificant	SA-E vs SA
TRINITY_DN4459_c0_g2_i1	1688	187	0.475105	-0.177023	Nonsignificant	SA-E vs SA
TRINITY_DN4459_c0_g4_i1	154	16	0.631477	-0.227689	Nonsignificant	SA-E vs SA
TRINITY_DN44745_c0_g1_i1	58	21	0.00210254	0.757979	Upregulated	SA-E vs SA
TRINITY_DN44876_c0_g1_i1	14	3	0.780907	0.343858	Nonsignificant	SA-E vs SA
TRINITY_DN4496_c0_g1_i1	190	12	0.0466774	-0.620674	Downregulated	SA-E vs SA
TRINITY_DN4497_c0_g1_i1	55	2	0.12358	-1.05654	Nonsignificant	SA-E vs SA
TRINITY_DN4497_c0_g2_i3	1697.96	355	0.0008473	0.32442	Upregulated	SA-E vs SA
TRINITY_DN4497_c0_g3_i1	424	38	0.148748	-0.344366	Nonsignificant	SA-E vs SA
TRINITY_DN45_c0_g1_i12	10946.9	1278.16	0.656523	-0.135531	Nonsignificant	SA-E vs SA
TRINITY_DN45_c0_g1_i14	627.36	64.27	0.322308	-0.238792	Nonsignificant	SA-E vs SA
TRINITY_DN45_c0_g1_i18	183.02	33.3	0.155064	0.214698	Nonsignificant	SA-E vs SA
TRINITY_DN45_c0_g1_i19	1319.87	52.17	2.6071e-09	-0.990692	Downregulated	SA-E vs SA
TRINITY_DN45_c0_g1_i5	6	20.76	4.26767e-10	2.54007	Upregulated	SA-E vs SA
TRINITY_DN45_c0_g1_i7	585.7	52.1	0.104608	-0.350284	Nonsignificant	SA-E vs SA
TRINITY_DN4504_c0_g1_i1	2899	197	0.000151492	-0.562881	Downregulated	SA-E vs SA
TRINITY_DN4504_c0_g2_i2	324	19.75	0.00909081	-0.64868	Downregulated	SA-E vs SA
TRINITY_DN451_c0_g1_i1	1187	126.95	0.377075	-0.204814	Nonsignificant	SA-E vs SA
TRINITY_DN4511_c0_g1_i1	221	21	0.371488	-0.298174	Nonsignificant	SA-E vs SA
TRINITY_DN4517_c0_g1_i1	1363	120	0.0442733	-0.358423	Downregulated	SA-E vs SA
TRINITY_DN4517_c0_g2_i1	12207	3187	3.03931e-07	0.4998	Upregulated	SA-E vs SA
TRINITY_DN452_c0_g1_i1	1556.24	160.34	0.249826	-0.234295	Nonsignificant	SA-E vs SA
TRINITY_DN452_c0_g1_i2	320.76	38.66	0.963451	-0.110464	Nonsignificant	SA-E vs SA
TRINITY_DN452_c0_g2_i1	507	40.83	0.048364	-0.428803	Downregulated	SA-E vs SA
TRINITY_DN45310_c0_g1_i1	530	114	0.0025751	0.346831	Upregulated	SA-E vs SA
TRINITY_DN45388_c0_g1_i1	21	3	1	0.0237362	Nonsignificant	SA-E vs SA
[truncated: 1,559 more rows]

## Sheet: P-value-sig
gene_id	SA	SA-E	Pvalue	logFC	category	condition
TRINITY_DN0_c0_g1_i14	175.69	1.03	3.9303e-07	-2.49739	Downregulated	SA-E vs SA
TRINITY_DN0_c0_g1_i15	9324.92	321.69	8.43402e-17	-1.09813	Downregulated	SA-E vs SA
TRINITY_DN0_c0_g1_i19	5153.8	160.06	1.54655e-17	-1.18109	Downregulated	SA-E vs SA
TRINITY_DN0_c0_g1_i33	23806.4	708.22	1.98829e-21	-1.21505	Downregulated	SA-E vs SA
TRINITY_DN1_c13_g1_i1	27	1.07501e+07	0	11.7406	Upregulated	SA-E vs SA
TRINITY_DN1000_c0_g1_i1	3161	554	0.0225206	0.185138	Upregulated	SA-E vs SA
TRINITY_DN1001_c0_g1_i1	6420.16	1399	0.000122012	0.35709	Upregulated	SA-E vs SA
TRINITY_DN1004_c0_g3_i1	21	35	2.06335e-14	1.96337	Upregulated	SA-E vs SA
TRINITY_DN1004_c1_g1_i1	14	8	0.0161862	1.11824	Upregulated	SA-E vs SA
TRINITY_DN1005_c0_g1_i1	21	13	0.000488104	1.18143	Upregulated	SA-E vs SA
TRINITY_DN1008_c0_g1_i1	346.16	19.35	0.00257805	-0.717067	Downregulated	SA-E vs SA
TRINITY_DN1008_c0_g2_i1	130.63	29	0.0386722	0.371785	Upregulated	SA-E vs SA
TRINITY_DN1008_c2_g1_i1	1014	50	2.65969e-06	-0.816094	Downregulated	SA-E vs SA
TRINITY_DN1010_c0_g1_i2	315.56	16	0.0015756	-0.794086	Downregulated	SA-E vs SA
TRINITY_DN1011_c0_g1_i1	346	77	0.00399889	0.373711	Upregulated	SA-E vs SA
TRINITY_DN1012_c0_g1_i4	366.22	24.37	0.0105726	-0.579433	Downregulated	SA-E vs SA
TRINITY_DN1012_c0_g1_i7	9327.74	228.11	1.57059e-24	-1.36977	Downregulated	SA-E vs SA
TRINITY_DN1013_c0_g1_i1	460	30	0.0063016	-0.59534	Downregulated	SA-E vs SA
TRINITY_DN10131_c0_g2_i1	1729	331	0.00576685	0.254851	Upregulated	SA-E vs SA
TRINITY_DN10131_c0_g3_i1	2042	173	0.0182112	-0.388774	Downregulated	SA-E vs SA
TRINITY_DN10197_c0_g1_i1	6596.8	387	6.75365e-07	-0.678939	Downregulated	SA-E vs SA
TRINITY_DN102_c0_g4_i1	1	13	2.47519e-06	3.58514	Upregulated	SA-E vs SA
TRINITY_DN102_c1_g3_i1	3	14	7.44748e-07	2.77627	Upregulated	SA-E vs SA
TRINITY_DN10211_c0_g2_i1	259	16	0.0175998	-0.63814	Downregulated	SA-E vs SA
TRINITY_DN1031_c0_g1_i1	243	49	0.0336881	0.295858	Upregulated	SA-E vs SA
TRINITY_DN1032_c0_g1_i2	526.11	28	0.000300221	-0.75583	Downregulated	SA-E vs SA
TRINITY_DN10323_c0_g1_i1	74.05	42.91	1.01947e-08	1.12928	Upregulated	SA-E vs SA
TRINITY_DN10323_c0_g1_i3	810.75	455.09	3.87543e-21	1.10415	Upregulated	SA-E vs SA
TRINITY_DN10325_c0_g4_i1	363	7	2.71108e-08	-1.55734	Downregulated	SA-E vs SA
TRINITY_DN10377_c0_g1_i1	84	26	0.00291723	0.634183	Upregulated	SA-E vs SA
TRINITY_DN104_c0_g1_i1	1738	512	1.83234e-08	0.595145	Upregulated	SA-E vs SA
TRINITY_DN1044_c0_g1_i5	159511	37535.3	8.47387e-06	0.417766	Upregulated	SA-E vs SA
TRINITY_DN10466_c0_g1_i1	25	17	4.17025e-05	1.25558	Upregulated	SA-E vs SA
TRINITY_DN10466_c0_g2_i1	78	26	0.00108855	0.692692	Upregulated	SA-E vs SA
TRINITY_DN1047_c0_g2_i2	3439.72	229.3	7.15053e-05	-0.578037	Downregulated	SA-E vs SA
TRINITY_DN10531_c0_g1_i2	1218.03	285.44	6.94139e-05	0.414509	Upregulated	SA-E vs SA
TRINITY_DN10531_c0_g1_i3	6125.82	1252.04	0.000679555	0.306519	Upregulated	SA-E vs SA
TRINITY_DN10531_c0_g3_i1	22750	4155	0.00744989	0.217687	Upregulated	SA-E vs SA
TRINITY_DN1061_c0_g1_i3	3092.85	223.01	0.000540694	-0.516074	Downregulated	SA-E vs SA
TRINITY_DN1061_c0_g1_i4	3431.96	833.99	6.39364e-06	0.443163	Upregulated	SA-E vs SA
TRINITY_DN1061_c0_g2_i1	1287	111	0.0357408	-0.374677	Downregulated	SA-E vs SA
TRINITY_DN1061_c0_g3_i1	264	18	0.0347118	-0.560244	Downregulated	SA-E vs SA
TRINITY_DN10628_c0_g1_i1	265.83	81.55	6.54022e-06	0.62714	Upregulated	SA-E vs SA
TRINITY_DN10628_c0_g1_i3	561.17	138.45	0.000106783	0.455125	Upregulated	SA-E vs SA
TRINITY_DN10634_c0_g1_i1	59	1	0.0246357	-1.65922	Downregulated	SA-E vs SA
TRINITY_DN10647_c0_g1_i1	587	32	0.000255123	-0.736868	Downregulated	SA-E vs SA
TRINITY_DN1067_c0_g1_i3	116.88	145	4.19171e-30	1.73028	Upregulated	SA-E vs SA
TRINITY_DN1069_c0_g2_i1	583	145	7.64505e-05	0.461489	Upregulated	SA-E vs SA
TRINITY_DN1079_c0_g1_i4	182.49	43	0.00857343	0.418822	Upregulated	SA-E vs SA
TRINITY_DN108_c0_g1_i1	170	4	0.000192791	-1.40023	Downregulated	SA-E vs SA
TRINITY_DN10814_c0_g1_i1	651	42	0.00179332	-0.603875	Downregulated	SA-E vs SA
TRINITY_DN10833_c0_g1_i1	129	3	0.000945626	-1.40947	Downregulated	SA-E vs SA
TRINITY_DN1088_c1_g2_i1	538	32	0.0011676	-0.668049	Downregulated	SA-E vs SA
TRINITY_DN1088_c1_g3_i1	263	13	0.00248181	-0.814175	Downregulated	SA-E vs SA
TRINITY_DN1088_c2_g1_i1	178	2	2.88668e-06	-1.98379	Downregulated	SA-E vs SA
TRINITY_DN1090_c0_g1_i3	11003.1	655.06	6.28154e-07	-0.667325	Downregulated	SA-E vs SA
TRINITY_DN10917_c0_g1_i1	16	15	1.05674e-05	1.50911	Upregulated	SA-E vs SA
TRINITY_DN1093_c0_g1_i1	170	8	0.0127332	-0.852981	Downregulated	SA-E vs SA
TRINITY_DN1093_c0_g3_i1	3371.71	299.7	0.0291269	-0.350877	Downregulated	SA-E vs SA
TRINITY_DN1093_c0_g3_i2	20.29	82.3	3.08072e-33	2.66558	Upregulated	SA-E vs SA
TRINITY_DN1093_c1_g1_i2	64	21	0.00405285	0.680259	Upregulated	SA-E vs SA
TRINITY_DN10932_c2_g3_i1	495	19	4.59971e-06	-1.01385	Downregulated	SA-E vs SA
TRINITY_DN10932_c2_g4_i1	193	42	0.0210364	0.356036	Upregulated	SA-E vs SA
TRINITY_DN1096_c0_g1_i1	44	13	0.0387935	0.597455	Upregulated	SA-E vs SA
TRINITY_DN11_c0_g1_i10	1685.61	11.33	4.16412e-32	-2.38944	Downregulated	SA-E vs SA
TRINITY_DN11_c0_g1_i14	6980.17	1.03	1.45866e-90	-5.40448	Downregulated	SA-E vs SA
TRINITY_DN11_c0_g1_i15	178.92	63.97	1.65638e-06	0.748028	Upregulated	SA-E vs SA
TRINITY_DN11_c0_g1_i19	74.86	1	0.00546398	-1.84719	Downregulated	SA-E vs SA
TRINITY_DN110_c0_g1_i2	793.93	740.86	3.3646e-36	1.50544	Upregulated	SA-E vs SA
TRINITY_DN110_c0_g1_i9	44.69	1.37	0.0452806	-1.19135	Downregulated	SA-E vs SA
TRINITY_DN11047_c0_g2_i1	198	204	1.93884e-30	1.58364	Upregulated	SA-E vs SA
TRINITY_DN1105_c0_g1_i1	818	40	7.27962e-06	-0.822684	Downregulated	SA-E vs SA
TRINITY_DN1107_c0_g1_i1	104.83	42.17	7.13852e-06	0.841107	Upregulated	SA-E vs SA
TRINITY_DN111_c0_g1_i2	71	89	5.31096e-24	1.73846	Upregulated	SA-E vs SA
TRINITY_DN1111_c0_g3_i1	397	21	0.00104485	-0.760653	Downregulated	SA-E vs SA
TRINITY_DN11123_c0_g1_i1	368	28	0.046012	-0.473635	Downregulated	SA-E vs SA
TRINITY_DN11152_c0_g1_i2	682.86	55.95	0.0397466	-0.415174	Downregulated	SA-E vs SA
TRINITY_DN11152_c0_g1_i8	44.35	13.09	0.0387935	0.596646	Upregulated	SA-E vs SA
TRINITY_DN11152_c0_g1_i9	22.06	41.38	1.07459e-16	2.0567	Upregulated	SA-E vs SA
TRINITY_DN1117_c1_g1_i1	45	1	0.0452806	-1.44536	Downregulated	SA-E vs SA
TRINITY_DN112_c0_g1_i1	1893.34	84.66	8.80631e-09	-0.893324	Downregulated	SA-E vs SA
TRINITY_DN112_c0_g1_i14	3511.02	754.87	0.000229035	0.346486	Upregulated	SA-E vs SA
TRINITY_DN112_c0_g1_i7	156.29	1.71	2.43484e-05	-2.00478	Downregulated	SA-E vs SA
TRINITY_DN112_c0_g1_i9	24.68	35.67	3.61333e-13	1.85086	Upregulated	SA-E vs SA
TRINITY_DN113_c0_g2_i2	88	38	4.81909e-06	0.897068	Upregulated	SA-E vs SA
TRINITY_DN113_c0_g3_i2	271.76	8	2.22822e-05	-1.22336	Downregulated	SA-E vs SA
TRINITY_DN113_c0_g3_i5	5602.99	1157.26	0.000538089	0.314803	Upregulated	SA-E vs SA
TRINITY_DN113_c0_g3_i6	181.25	104.74	2.34103e-14	1.1271	Upregulated	SA-E vs SA
TRINITY_DN11335_c0_g1_i1	222	90	4.94142e-09	0.847236	Upregulated	SA-E vs SA
TRINITY_DN1135_c0_g1_i1	25	22	2.42031e-07	1.45914	Upregulated	SA-E vs SA
TRINITY_DN1137_c0_g1_i2	1828.76	310.47	0.0474345	0.16001	Upregulated	SA-E vs SA
TRINITY_DN11398_c0_g1_i5	332.81	117.56	2.11227e-08	0.738476	Upregulated	SA-E vs SA
TRINITY_DN11398_c0_g3_i1	104	3	0.00764597	-1.23939	Downregulated	SA-E vs SA
TRINITY_DN114_c0_g1_i10	340.04	72.13	0.00891795	0.335846	Upregulated	SA-E vs SA
TRINITY_DN114_c0_g1_i14	548.87	134.65	0.00011453	0.45065	Upregulated	SA-E vs SA
TRINITY_DN114_c0_g1_i15	122.08	4.98	0.0187995	-0.965795	Downregulated	SA-E vs SA
TRINITY_DN114_c0_g1_i5	7274.94	557.07	0.00107021	-0.468599	Downregulated	SA-E vs SA
TRINITY_DN114_c0_g1_i7	229.6	49.12	0.0197909	0.342573	Upregulated	SA-E vs SA
TRINITY_DN1142_c0_g1_i1	54	1	0.0276789	-1.58931	Downregulated	SA-E vs SA
TRINITY_DN1145_c0_g1_i2	374.43	95.09	0.000188122	0.477968	Upregulated	SA-E vs SA
TRINITY_DN1145_c0_g2_i1	2648	577	0.000193237	0.357064	Upregulated	SA-E vs SA
TRINITY_DN1146_c0_g1_i5	50	1	0.0397031	-1.52854	Downregulated	SA-E vs SA
TRINITY_DN1146_c0_g2_i1	152	8	0.0230463	-0.76462	Downregulated	SA-E vs SA
TRINITY_DN1147_c0_g1_i1	1764	347	0.0032375	0.276299	Upregulated	SA-E vs SA
TRINITY_DN1148_c0_g1_i1	462	9.67	4.12385e-09	-1.49263	Downregulated	SA-E vs SA
TRINITY_DN11483_c0_g1_i1	101	1	0.000296643	-2.08365	Downregulated	SA-E vs SA
TRINITY_DN1153_c0_g1_i2	8	12.83	4.812e-06	1.93299	Upregulated	SA-E vs SA
TRINITY_DN11549_c0_g1_i1	476	11	6.38187e-09	-1.41446	Downregulated	SA-E vs SA
TRINITY_DN11549_c0_g2_i3	2749.5	248	0.0396078	-0.339312	Downregulated	SA-E vs SA
TRINITY_DN11549_c0_g3_i1	256	5	1.96508e-06	-1.54727	Downregulated	SA-E vs SA
TRINITY_DN1155_c0_g1_i1	190	6	0.000535268	-1.16793	Downregulated	SA-E vs SA
TRINITY_DN1155_c1_g1_i1	151	9	0.0476948	-0.666417	Downregulated	SA-E vs SA
TRINITY_DN11552_c0_g1_i1	272	19	0.0450954	-0.541127	Downregulated	SA-E vs SA
TRINITY_DN11559_c0_g2_i1	194	12	0.0341522	-0.637123	Downregulated	SA-E vs SA
TRINITY_DN116_c0_g1_i13	4.15	23	1.42164e-10	2.91202	Upregulated	SA-E vs SA
TRINITY_DN11652_c1_g1_i1	1544.47	86.26	6.28799e-06	-0.717747	Downregulated	SA-E vs SA
TRINITY_DN11652_c1_g1_i2	324.74	21	0.0131415	-0.60203	Downregulated	SA-E vs SA
TRINITY_DN11652_c1_g1_i3	139.79	46.74	3.7489e-05	0.695117	Upregulated	SA-E vs SA
TRINITY_DN11655_c1_g2_i3	183.42	9	0.0116633	-0.819977	Downregulated	SA-E vs SA
TRINITY_DN11655_c1_g4_i1	11856	769	9.37971e-06	-0.599658	Downregulated	SA-E vs SA
TRINITY_DN11656_c0_g1_i1	3314	645	0.00271604	0.267894	Upregulated	SA-E vs SA
TRINITY_DN1171_c0_g1_i1	309.64	21.24	0.0228436	-0.555465	Downregulated	SA-E vs SA
TRINITY_DN1171_c0_g3_i1	234	14	0.0184168	-0.663423	Downregulated	SA-E vs SA
TRINITY_DN11728_c0_g1_i1	98	4	0.0384848	-0.965342	Downregulated	SA-E vs SA
TRINITY_DN11740_c0_g1_i1	45	1	0.0452806	-1.44536	Downregulated	SA-E vs SA
TRINITY_DN1175_c0_g1_i1	51.32	0.71	0.0397031	-1.81952	Downregulated	SA-E vs SA
TRINITY_DN1175_c0_g1_i4	299.68	4.32	1.52561e-08	-1.78706	Downregulated	SA-E vs SA
TRINITY_DN119_c0_g1_i4	2	27	3.33429e-12	3.61493	Upregulated	SA-E vs SA
TRINITY_DN11922_c0_g1_i1	24.26	0.45	0.0246349	-1.588	Downregulated	SA-E vs SA
TRINITY_DN11922_c0_g1_i2	536.74	39.55	0.0188282	-0.498955	Downregulated	SA-E vs SA
TRINITY_DN11951_c0_g1_i1	936	75	0.0183398	-0.432777	Downregulated	SA-E vs SA
TRINITY_DN11964_c0_g1_i1	39	13	0.0211185	0.692693	Upregulated	SA-E vs SA
TRINITY_DN1198_c1_g1_i1	7	16	2.21221e-08	2.21274	Upregulated	SA-E vs SA
TRINITY_DN12_c0_g2_i1	14	7	0.0384743	1.01281	Upregulated	SA-E vs SA
TRINITY_DN12_c0_g5_i1	18	10	0.00662995	1.096	Upregulated	SA-E vs SA
TRINITY_DN120_c0_g1_i1	120	3	0.00225486	-1.35237	Downregulated	SA-E vs SA
TRINITY_DN121_c1_g1_i3	844.63	498	1.27137e-22	1.14297	Upregulated	SA-E vs SA
TRINITY_DN1215_c0_g1_i1	170	10	0.0373851	-0.676805	Downregulated	SA-E vs SA
TRINITY_DN12159_c1_g2_i1	59	41	9.19915e-10	1.27271	Upregulated	SA-E vs SA
TRINITY_DN1217_c1_g1_i1	18	13	0.000165623	1.30314	Upregulated	SA-E vs SA
TRINITY_DN12256_c0_g1_i1	44	17	0.00297647	0.809254	Upregulated	SA-E vs SA
TRINITY_DN12256_c1_g1_i1	18	17	6.16451e-06	1.51494	Upregulated	SA-E vs SA
TRINITY_DN12270_c0_g1_i1	202	6	0.0002523	-1.21628	Downregulated	SA-E vs SA
TRINITY_DN12288_c0_g1_i1	105	63	1.68804e-11	1.15676	Upregulated	SA-E vs SA
TRINITY_DN1230_c0_g2_i1	125	6	0.0294287	-0.837347	Downregulated	SA-E vs SA
TRINITY_DN12342_c0_g1_i1	136	7	0.0318622	-0.782231	Downregulated	SA-E vs SA
TRINITY_DN12380_c0_g1_i1	12	7	0.016576	1.13452	Upregulated	SA-E vs SA
TRINITY_DN12387_c0_g1_i2	75	21	0.0151306	0.555037	Upregulated	SA-E vs SA
TRINITY_DN124_c0_g1_i28	13.35	7.38	0.016576	1.09209	Upregulated	SA-E vs SA
TRINITY_DN1243_c0_g1_i2	548.87	99.22	0.0440406	0.209579	Upregulated	SA-E vs SA
TRINITY_DN1243_c0_g1_i3	702.13	41.78	0.000505419	-0.667716	Downregulated	SA-E vs SA
TRINITY_DN1243_c0_g3_i1	152	4	0.000588384	-1.31187	Downregulated	SA-E vs SA
TRINITY_DN12454_c0_g1_i1	222	14	0.0270464	-0.62186	Downregulated	SA-E vs SA
TRINITY_DN1246_c0_g3_i1	137.17	110.08	1.13604e-19	1.38636	Upregulated	SA-E vs SA
TRINITY_DN12487_c0_g1_i1	18444	1670	0.0270536	-0.336288	Downregulated	SA-E vs SA
TRINITY_DN12487_c0_g3_i1	178	7	0.0028866	-0.994713	Downregulated	SA-E vs SA
TRINITY_DN125_c0_g1_i12	23233.4	5454.05	1.00783e-05	0.41587	Upregulated	SA-E vs SA
TRINITY_DN125_c0_g1_i6	21.01	0.15	0.0433314	-2.34182	Downregulated	SA-E vs SA
TRINITY_DN1255_c0_g1_i2	124.25	45.04	2.19303e-05	0.758907	Upregulated	SA-E vs SA
TRINITY_DN1255_c0_g1_i3	1170.84	70.27	8.31767e-05	-0.660951	Downregulated	SA-E vs SA
TRINITY_DN1262_c0_g1_i1	11	35	3.96752e-16	2.4739	Upregulated	SA-E vs SA
TRINITY_DN1262_c0_g2_i1	2	18	1.24618e-08	3.29481	Upregulated	SA-E vs SA
TRINITY_DN1262_c0_g5_i1	47	15	0.0197076	0.65836	Upregulated	SA-E vs SA
TRINITY_DN1262_c0_g8_i1	781	509	3.60595e-25	1.22205	Upregulated	SA-E vs SA
TRINITY_DN1264_c0_g2_i1	2536	225	0.0323194	-0.352337	Downregulated	SA-E vs SA
TRINITY_DN1265_c1_g1_i1	279	14	0.00265213	-0.802292	Downregulated	SA-E vs SA
TRINITY_DN12676_c0_g1_i2	3229.67	643	0.00164451	0.285792	Upregulated	SA-E vs SA
TRINITY_DN12676_c0_g2_i1	622.1	118	0.0183065	0.247559	Upregulated	SA-E vs SA
TRINITY_DN1276_c0_g1_i1	574	42	0.0132456	-0.50449	Downregulated	SA-E vs SA
TRINITY_DN128_c2_g1_i10	147	5.06	0.00316175	-1.09987	Downregulated	SA-E vs SA
TRINITY_DN1289_c0_g2_i1	833	220	4.9624e-06	0.508898	Upregulated	SA-E vs SA
TRINITY_DN129_c0_g2_i1	35549.2	2436	3.36888e-05	-0.556284	Downregulated	SA-E vs SA
TRINITY_DN1292_c0_g2_i1	724	45	0.000781281	-0.633315	Downregulated	SA-E vs SA
TRINITY_DN13_c1_g4_i1	18	12	0.000421961	1.23994	Upregulated	SA-E vs SA
TRINITY_DN13047_c0_g1_i1	13	11	0.000556462	1.42817	Upregulated	SA-E vs SA
TRINITY_DN13074_c0_g1_i1	40	54	1.43764e-17	1.797	Upregulated	SA-E vs SA
TRINITY_DN13078_c0_g1_i2	1834	109	1.70172e-05	-0.668668	Downregulated	SA-E vs SA
TRINITY_DN1308_c0_g2_i1	198	9	0.00498626	-0.880366	Downregulated	SA-E vs SA
TRINITY_DN1313_c0_g5_i1	983.47	58.41	0.000120885	-0.669216	Downregulated	SA-E vs SA
TRINITY_DN1318_c0_g1_i1	273	6	2.20435e-06	-1.45408	Downregulated	SA-E vs SA
TRINITY_DN1320_c0_g1_i3	429.6	86.62	0.0118003	0.295793	Upregulated	SA-E vs SA
TRINITY_DN1320_c0_g2_i1	165	8	0.0114779	-0.829412	Downregulated	SA-E vs SA
TRINITY_DN1323_c0_g1_i1	23	19	3.55231e-06	1.40922	Upregulated	SA-E vs SA
TRINITY_DN1327_c0_g1_i1	503	39	0.0312715	-0.458753	Downregulated	SA-E vs SA
TRINITY_DN1327_c0_g2_i3	488.66	15.46	1.7718e-07	-1.16646	Downregulated	SA-E vs SA
TRINITY_DN1327_c1_g2_i1	246.67	11	0.00142613	-0.895457	Downregulated	SA-E vs SA
TRINITY_DN13306_c1_g1_i1	135	5	0.00564883	-1.04205	Downregulated	SA-E vs SA
TRINITY_DN134_c0_g1_i4	552.13	39.34	0.0091219	-0.525477	Downregulated	SA-E vs SA
TRINITY_DN134_c0_g4_i1	235	70	3.20679e-05	0.603889	Upregulated	SA-E vs SA
TRINITY_DN1342_c0_g1_i3	402.4	251.55	2.44077e-21	1.18915	Upregulated	SA-E vs SA
TRINITY_DN1344_c0_g3_i1	397	30	0.0386181	-0.479051	Downregulated	SA-E vs SA
TRINITY_DN135_c0_g1_i16	2740.43	9	1.4478e-47	-2.9549	Downregulated	SA-E vs SA
TRINITY_DN135_c4_g1_i3	339	21	0.00849732	-0.635959	Downregulated	SA-E vs SA
TRINITY_DN13536_c0_g1_i1	29	36	1.39298e-12	1.73078	Upregulated	SA-E vs SA
TRINITY_DN13559_c0_g1_i1	414	9	1.69804e-08	-1.46271	Downregulated	SA-E vs SA
TRINITY_DN13596_c1_g1_i1	223	11	0.00538664	-0.81581	Downregulated	SA-E vs SA
TRINITY_DN136_c0_g1_i1	489	98	0.0102315	0.291	Upregulated	SA-E vs SA
TRINITY_DN136_c0_g2_i1	557	105	0.024342	0.242673	Upregulated	SA-E vs SA
TRINITY_DN13611_c0_g3_i1	1011	77	0.00840544	-0.472854	Downregulated	SA-E vs SA
TRINITY_DN13648_c0_g1_i1	385	17	0.000142372	-0.903252	Downregulated	SA-E vs SA
TRINITY_DN1367_c1_g1_i3	2408.39	197.81	0.00954184	-0.413259	Downregulated	SA-E vs SA
TRINITY_DN1367_c1_g1_i8	646.9	24.8	5.16232e-07	-1.01483	Downregulated	SA-E vs SA
TRINITY_DN1367_c1_g3_i1	603	11	5.85579e-12	-1.60118	Downregulated	SA-E vs SA
TRINITY_DN1377_c0_g1_i1	505.89	98.05	0.0180841	0.264593	Upregulated	SA-E vs SA
TRINITY_DN1377_c0_g1_i11	248.76	251.45	6.59196e-32	1.56856	Upregulated	SA-E vs SA
TRINITY_DN138_c0_g1_i8	207	2	1.99595e-07	-2.10296	Downregulated	SA-E vs SA
TRINITY_DN13829_c1_g2_i1	61	17	0.0300003	0.551331	Upregulated	SA-E vs SA
TRINITY_DN13829_c1_g3_i2	2202.08	172.83	0.00465448	-0.449137	Downregulated	SA-E vs SA
TRINITY_DN13829_c1_g3_i3	9928.66	266.42	1.68674e-22	-1.29649	Downregulated	SA-E vs SA
TRINITY_DN13829_c1_g3_i4	510.98	33.78	0.00627578	-0.584628	Downregulated	SA-E vs SA
TRINITY_DN13829_c1_g3_i8	619.57	212.13	1.53856e-09	0.71384	Upregulated	SA-E vs SA
TRINITY_DN139_c0_g1_i5	359.06	99.4	3.03679e-05	0.546059	Upregulated	SA-E vs SA
TRINITY_DN139_c0_g1_i6	749.07	38.6	3.80941e-05	-0.781311	Downregulated	SA-E vs SA
TRINITY_DN139_c0_g2_i1	204	13	0.0410173	-0.61361	Downregulated	SA-E vs SA
TRINITY_DN14049_c0_g1_i1	2	24	4.79413e-11	3.52194	Upregulated	SA-E vs SA
TRINITY_DN14116_c0_g1_i1	35	12	0.023845	0.714934	Upregulated	SA-E vs SA
TRINITY_DN1414_c0_g1_i2	2090.34	380	0.0138697	0.214009	Upregulated	SA-E vs SA
TRINITY_DN14192_c0_g2_i1	2299	423	0.0104493	0.223526	Upregulated	SA-E vs SA
TRINITY_DN1420_c0_g1_i4	256	2	4.23223e-09	-2.2707	Downregulated	SA-E vs SA
TRINITY_DN143_c0_g2_i1	87	35	2.26777e-05	0.841163	Upregulated	SA-E vs SA
TRINITY_DN14395_c0_g1_i1	1816	150	0.0130129	-0.408798	Downregulated	SA-E vs SA
TRINITY_DN14395_c1_g1_i1	307.37	432	8.05735e-45	1.8288	Upregulated	SA-E vs SA
TRINITY_DN14395_c1_g1_i3	403	23.37	0.00225438	-0.688072	Downregulated	SA-E vs SA
TRINITY_DN1453_c1_g1_i1	490	6	2.01948e-12	-1.9159	Downregulated	SA-E vs SA
TRINITY_DN14547_c0_g1_i2	38.95	0.01	0.00339444	-4.96715	Downregulated	SA-E vs SA
TRINITY_DN1456_c0_g3_i1	363	20	0.00217941	-0.728485	Downregulated	SA-E vs SA
TRINITY_DN1461_c0_g1_i1	916	170	0.0175268	0.230347	Upregulated	SA-E vs SA
TRINITY_DN1461_c1_g2_i1	548	34	0.00191661	-0.634725	Downregulated	SA-E vs SA
TRINITY_DN1461_c1_g3_i2	203.83	9.49	0.00337854	-0.861422	Downregulated	SA-E vs SA
TRINITY_DN14660_c1_g1_i1	73	1	0.00401524	-1.82733	Downregulated	SA-E vs SA
TRINITY_DN1469_c0_g1_i1	360	14	4.31553e-05	-1.00353	Downregulated	SA-E vs SA
TRINITY_DN147_c0_g2_i2	96	36	5.94916e-05	0.785684	Upregulated	SA-E vs SA
TRINITY_DN1491_c0_g1_i1	584	110	0.0224066	0.242029	Upregulated	SA-E vs SA
TRINITY_DN1491_c0_g2_i1	325	19	0.00614691	-0.681679	Downregulated	SA-E vs SA
TRINITY_DN1497_c1_g1_i2	530.78	21.04	3.9527e-06	-0.988435	Downregulated	SA-E vs SA
TRINITY_DN1497_c2_g1_i2	74.81	27.28	0.000535418	0.763603	Upregulated	SA-E vs SA
TRINITY_DN14999_c0_g1_i1	142	6	0.0108903	-0.938021	Downregulated	SA-E vs SA
TRINITY_DN15_c0_g1_i10	1018.95	56.08	2.61884e-05	-0.729336	Downregulated	SA-E vs SA
TRINITY_DN15_c0_g1_i12	37	19	0.000142624	1.03387	Upregulated	SA-E vs SA
TRINITY_DN15_c0_g1_i13	610.29	110.68	0.0369132	0.21213	Upregulated	SA-E vs SA
TRINITY_DN15_c0_g1_i7	2053	44.95	3.62292e-19	-1.45708	Downregulated	SA-E vs SA
TRINITY_DN15_c0_g1_i8	721.92	25.52	6.86781e-08	-1.07886	Downregulated	SA-E vs SA
TRINITY_DN15_c0_g2_i3	1018.24	194.03	0.00948141	0.25119	Upregulated	SA-E vs SA
TRINITY_DN15_c1_g1_i2	765	34.17	2.12298e-06	-0.894171	Downregulated	SA-E vs SA
TRINITY_DN15036_c0_g1_i2	14	17	4.53154e-07	1.71336	Upregulated	SA-E vs SA
TRINITY_DN15040_c0_g1_i1	77	44	9.14061e-09	1.11824	Upregulated	SA-E vs SA
TRINITY_DN1514_c0_g1_i3	661.16	40	0.000725451	-0.654622	Downregulated	SA-E vs SA
TRINITY_DN1514_c0_g1_i5	77.17	29	0.000236571	0.787354	Upregulated	SA-E vs SA
TRINITY_DN1514_c0_g1_i8	93	2	0.00318237	-1.47125	Downregulated	SA-E vs SA
TRINITY_DN1515_c0_g1_i1	127	5	0.0117205	-0.993825	Downregulated	SA-E vs SA
TRINITY_DN15195_c0_g2_i1	92.32	30.71	0.000508818	0.691066	Upregulated	SA-E vs SA
TRINITY_DN15195_c0_g2_i2	515.68	9.29	5.63903e-11	-1.61107	Downregulated	SA-E vs SA
TRINITY_DN1535_c0_g2_i1	11	16	1.75007e-07	1.85589	Upregulated	SA-E vs SA
TRINITY_DN1541_c0_g1_i1	183	8	0.00464257	-0.911159	Downregulated	SA-E vs SA
TRINITY_DN15437_c0_g1_i2	154	3	0.000206754	-1.54932	Downregulated	SA-E vs SA
TRINITY_DN1545_c0_g1_i1	453	33	0.0220465	-0.507984	Downregulated	SA-E vs SA
TRINITY_DN1547_c0_g1_i1	314	11	3.61538e-05	-1.086	Downregulated	SA-E vs SA
TRINITY_DN1558_c0_g2_i2	149	7	0.0154208	-0.854307	Downregulated	SA-E vs SA
TRINITY_DN1559_c0_g3_i1	1540	318	0.00122336	0.314613	Upregulated	SA-E vs SA
TRINITY_DN156_c0_g3_i1	20.11	23.89	2.72686e-09	1.69605	Upregulated	SA-E vs SA
TRINITY_DN1562_c0_g1_i3	290.91	63.54	0.0073205	0.358938	Upregulated	SA-E vs SA
TRINITY_DN1562_c0_g2_i1	171.15	10	0.0373851	-0.682128	Downregulated	SA-E vs SA
TRINITY_DN157_c0_g1_i3	268	6	3.53068e-06	-1.43949	Downregulated	SA-E vs SA
TRINITY_DN157_c1_g1_i2	993.89	81	0.0209397	-0.419394	Downregulated	SA-E vs SA
TRINITY_DN1577_c0_g1_i1	28	13	0.00401524	0.954305	Upregulated	SA-E vs SA
TRINITY_DN1583_c0_g1_i3	45	17	0.005121	0.791511	Upregulated	SA-E vs SA
TRINITY_DN1586_c0_g1_i1	48	16	0.0112329	0.692693	Upregulated	SA-E vs SA
TRINITY_DN1590_c0_g1_i2	590.16	22.18	6.81629e-07	-1.0305	Downregulated	SA-E vs SA
TRINITY_DN1590_c0_g2_i1	733	253	4.97535e-10	0.720212	Upregulated	SA-E vs SA
TRINITY_DN1591_c0_g1_i1	1311	292.83	0.000222782	0.376616	Upregulated	SA-E vs SA
TRINITY_DN1591_c0_g3_i1	94	4	0.0340935	-0.932441	Downregulated	SA-E vs SA
TRINITY_DN1593_c0_g6_i1	64	2	0.0370978	-1.17619	Downregulated	SA-E vs SA
TRINITY_DN16093_c0_g1_i1	65	18	0.0266216	0.546313	Upregulated	SA-E vs SA
TRINITY_DN161_c0_g1_i1	151540	60837.4	8.7516e-16	0.839515	Upregulated	SA-E vs SA
TRINITY_DN161_c0_g1_i3	36332.6	7884.57	0.000103489	0.353835	Upregulated	SA-E vs SA
TRINITY_DN16160_c0_g1_i1	606.38	32	0.000121707	-0.762514	Downregulated	SA-E vs SA
TRINITY_DN16160_c0_g1_i2	7.62	27	6.97018e-13	2.55885	Upregulated	SA-E vs SA
TRINITY_DN16189_c0_g1_i2	175	9	0.0154611	-0.782876	Downregulated	SA-E vs SA
TRINITY_DN163_c0_g1_i3	27	68	1.13906e-27	2.28932	Upregulated	SA-E vs SA
TRINITY_DN16321_c0_g1_i1	487	38	0.0363118	-0.453739	Downregulated	SA-E vs SA
TRINITY_DN16324_c0_g1_i1	174	5	0.000486893	-1.24242	Downregulated	SA-E vs SA
TRINITY_DN1643_c0_g1_i1	327	12	4.92845e-05	-1.04933	Downregulated	SA-E vs SA
TRINITY_DN1646_c0_g1_i1	196.79	7	0.000899355	-1.07394	Downregulated	SA-E vs SA
TRINITY_DN1646_c0_g1_i4	218923	42418.7	0.00189258	0.264365	Upregulated	SA-E vs SA
TRINITY_DN1646_c0_g1_i8	705.75	243	6.12163e-10	0.718283	Upregulated	SA-E vs SA
TRINITY_DN1646_c1_g3_i1	65	47	9.84087e-11	1.30407	Upregulated	SA-E vs SA
TRINITY_DN16492_c0_g1_i1	6	33	7.35991e-15	2.90599	Upregulated	SA-E vs SA
TRINITY_DN1650_c0_g1_i1	156	93	4.19936e-14	1.15168	Upregulated	SA-E vs SA
TRINITY_DN16513_c0_g1_i1	200	10	0.00893797	-0.805117	Downregulated	SA-E vs SA
TRINITY_DN16513_c0_g1_i7	460.44	14.13	3.14289e-07	-1.19052	Downregulated	SA-E vs SA
TRINITY_DN16513_c0_g2_i1	581	31	0.000182105	-0.753823	Downregulated	SA-E vs SA
TRINITY_DN16513_c0_g3_i1	16	26	9.12761e-11	1.94338	Upregulated	SA-E vs SA
TRINITY_DN16513_c2_g1_i1	57	18	0.0107729	0.650005	Upregulated	SA-E vs SA
TRINITY_DN1652_c0_g1_i1	95.81	26.25	0.00937491	0.537877	Upregulated	SA-E vs SA
TRINITY_DN1652_c0_g1_i3	1679.19	288.75	0.0387121	0.170116	Upregulated	SA-E vs SA
TRINITY_DN1653_c0_g2_i2	19.84	8.3	0.0452806	0.872045	Upregulated	SA-E vs SA
TRINITY_DN1659_c0_g1_i1	76	26	0.00139668	0.713201	Upregulated	SA-E vs SA
TRINITY_DN166_c0_g1_i7	247.29	4.58	2.41789e-06	-1.58921	Downregulated	SA-E vs SA
TRINITY_DN166_c0_g1_i8	561.86	44.75	0.0367324	-0.437541	Downregulated	SA-E vs SA
TRINITY_DN16616_c0_g1_i2	228.47	3.97	2.73538e-06	-1.63956	Downregulated	SA-E vs SA
TRINITY_DN1663_c0_g1_i1	24	65	4.7856e-28	2.34669	Upregulated	SA-E vs SA
TRINITY_DN167_c0_g2_i3	230.07	2.15	3.76962e-08	-2.12928	Downregulated	SA-E vs SA
TRINITY_DN1680_c0_g1_i1	212	43	0.0414011	0.300481	Upregulated	SA-E vs SA
TRINITY_DN1687_c1_g1_i1	130	54	4.07603e-07	0.866435	Upregulated	SA-E vs SA
TRINITY_DN17_c0_g1_i2	62	55	3.08701e-14	1.46548	Upregulated	SA-E vs SA
TRINITY_DN17_c0_g2_i3	433	13	5.7584e-07	-1.20782	Downregulated	SA-E vs SA
TRINITY_DN170_c1_g1_i1	81359.9	18665.8	1.91368e-05	0.397748	Upregulated	SA-E vs SA
TRINITY_DN1707_c0_g1_i1	149	6	0.00788991	-0.976012	Downregulated	SA-E vs SA
TRINITY_DN17111_c0_g1_i1	461	27	0.00178748	-0.680238	Downregulated	SA-E vs SA
TRINITY_DN17111_c0_g2_i1	332	12	3.4228e-05	-1.06131	Downregulated	SA-E vs SA
TRINITY_DN1712_c0_g1_i1	240	47	0.0486678	0.272765	Upregulated	SA-E vs SA
TRINITY_DN17139_c0_g3_i3	592	23	1.36708e-06	-1.0043	Downregulated	SA-E vs SA
TRINITY_DN17139_c1_g2_i1	475.51	96.28	0.0103685	0.299106	Upregulated	SA-E vs SA
TRINITY_DN17139_c1_g2_i3	549.1	106.72	0.0144448	0.26678	Upregulated	SA-E vs SA
TRINITY_DN17150_c0_g1_i3	208.28	68	6.30811e-06	0.676299	Upregulated	SA-E vs SA
TRINITY_DN17150_c1_g1_i1	55.75	17.41	0.0181302	0.6412	Upregulated	SA-E vs SA
TRINITY_DN17150_c1_g1_i4	163.25	34.59	0.034997	0.334957	Upregulated	SA-E vs SA
TRINITY_DN17198_c0_g1_i1	292	3	4.52997e-09	-2.05446	Downregulated	SA-E vs SA
TRINITY_DN172_c0_g1_i7	329.33	9	2.81452e-06	-1.28207	Downregulated	SA-E vs SA
TRINITY_DN1721_c0_g2_i1	2091	188	0.0442854	-0.341847	Downregulated	SA-E vs SA
TRINITY_DN17322_c0_g1_i1	199	9	0.00498626	-0.884343	Downregulated	SA-E vs SA
TRINITY_DN1745_c0_g1_i4	863.16	38.15	7.23193e-07	-0.902498	Downregulated	SA-E vs SA
TRINITY_DN1745_c0_g1_i6	238	63	0.000437539	0.51069	Upregulated	SA-E vs SA
TRINITY_DN1745_c0_g2_i1	130	38	0.00104733	0.589	Upregulated	SA-E vs SA
TRINITY_DN1750_c0_g2_i1	73.23	21.92	0.00657299	0.607746	Upregulated	SA-E vs SA
TRINITY_DN1754_c0_g1_i1	445	9	3.12397e-09	-1.51972	Downregulated	SA-E vs SA
TRINITY_DN1760_c0_g1_i6	540.71	267.9	9.86537e-17	1.00561	Upregulated	SA-E vs SA
TRINITY_DN1760_c0_g4_i1	178	10	0.0284866	-0.713111	Downregulated	SA-E vs SA
TRINITY_DN17610_c0_g1_i3	353.85	20.23	0.00263336	-0.699301	Downregulated	SA-E vs SA
TRINITY_DN17610_c0_g1_i6	186.48	6.78	0.00149312	-1.05667	Downregulated	SA-E vs SA
TRINITY_DN17610_c0_g1_i7	4733.67	430.99	0.0376782	-0.331911	Downregulated	SA-E vs SA
TRINITY_DN17610_c0_g2_i1	26	11	0.0173117	0.880922	Upregulated	SA-E vs SA
TRINITY_DN17610_c1_g1_i1	46	30	2.71595e-07	1.22259	Upregulated	SA-E vs SA
TRINITY_DN17733_c0_g1_i1	506	27	0.00030625	-0.753773	Downregulated	SA-E vs SA
TRINITY_DN1775_c0_g1_i6	558	36	0.00302174	-0.603875	Downregulated	SA-E vs SA
TRINITY_DN1776_c0_g1_i1	22	13	0.00124544	1.14471	Upregulated	SA-E vs SA
TRINITY_DN180_c0_g2_i1	445	25	0.00104087	-0.713111	Downregulated	SA-E vs SA
TRINITY_DN180_c0_g3_i1	482	89	0.0396521	0.226328	Upregulated	SA-E vs SA
TRINITY_DN180_c0_g4_i1	3844	211	2.36081e-07	-0.731438	Downregulated	SA-E vs SA
TRINITY_DN1801_c1_g1_i1	318	69	0.00690111	0.353727	Upregulated	SA-E vs SA
TRINITY_DN1801_c2_g2_i1	549	21	1.71815e-06	-1.01658	Downregulated	SA-E vs SA
TRINITY_DN18037_c0_g2_i1	165	37	0.0202481	0.379716	Upregulated	SA-E vs SA
TRINITY_DN18112_c0_g1_i1	92	22	0.0339705	0.430467	Upregulated	SA-E vs SA
TRINITY_DN1837_c0_g1_i1	515.16	123	0.000311887	0.429246	Upregulated	SA-E vs SA
TRINITY_DN1837_c0_g2_i1	2756.54	760.21	9.98204e-08	0.54306	Upregulated	SA-E vs SA
TRINITY_DN1837_c0_g2_i2	1779.76	132.79	0.00236796	-0.489099	Downregulated	SA-E vs SA
TRINITY_DN18372_c0_g2_i1	165	7	0.00599981	-0.934837	Downregulated	SA-E vs SA
TRINITY_DN184_c1_g1_i1	17.05	10	0.00268218	1.13881	Upregulated	SA-E vs SA
TRINITY_DN184_c1_g2_i1	74.74	1.75	0.0174197	-1.4041	Downregulated	SA-E vs SA
TRINITY_DN184_c2_g1_i1	111	1	0.000148835	-2.15819	Downregulated	SA-E vs SA
TRINITY_DN1846_c0_g2_i1	1	24	8.24314e-11	4.06919	Upregulated	SA-E vs SA
TRINITY_DN1867_c0_g2_i1	6925.34	1660	6.74368e-06	0.432343	Upregulated	SA-E vs SA
TRINITY_DN1867_c0_g3_i1	341	23	0.020148	-0.56878	Downregulated	SA-E vs SA
TRINITY_DN1867_c0_g4_i1	1135	218	0.00742698	0.257447	Upregulated	SA-E vs SA
TRINITY_DN187_c1_g1_i2	2203.84	197.62	0.0418995	-0.343943	Downregulated	SA-E vs SA
TRINITY_DN187_c1_g1_i3	374.93	18.12	0.0004331	-0.831953	Downregulated	SA-E vs SA
TRINITY_DN187_c1_g1_i5	1261.17	393.62	3.77373e-09	0.640745	Upregulated	SA-E vs SA
TRINITY_DN187_c1_g1_i6	71.35	33.63	3.84165e-06	0.966208	Upregulated	SA-E vs SA
TRINITY_DN187_c1_g2_i1	119	53	1.36301e-07	0.921479	Upregulated	SA-E vs SA
TRINITY_DN18739_c1_g1_i1	152	4	0.000588384	-1.31187	Downregulated	SA-E vs SA
TRINITY_DN18789_c0_g1_i1	29	13	0.00401524	0.9266	Upregulated	SA-E vs SA
TRINITY_DN188_c0_g2_i2	208	58	0.000258671	0.551777	Upregulated	SA-E vs SA
TRINITY_DN1880_c0_g1_i1	1201	328	6.04015e-07	0.535354	Upregulated	SA-E vs SA
TRINITY_DN1883_c0_g1_i1	253	16	0.0232644	-0.619634	Downregulated	SA-E vs SA
TRINITY_DN1883_c0_g2_i1	258	14	0.00575734	-0.740511	Downregulated	SA-E vs SA
TRINITY_DN1886_c0_g1_i1	554	30	0.000307862	-0.742141	Downregulated	SA-E vs SA
TRINITY_DN1886_c1_g1_i1	163	35	0.034997	0.345471	Upregulated	SA-E vs SA
TRINITY_DN189_c0_g1_i1	122	4	0.00575891	-1.13829	Downregulated	SA-E vs SA
TRINITY_DN189_c0_g2_i1	211.58	53	0.00206414	0.467128	Upregulated	SA-E vs SA
TRINITY_DN18952_c1_g1_i1	19	21	4.82185e-08	1.63908	Upregulated	SA-E vs SA
TRINITY_DN19_c9_g1_i1	2268	137	1.37298e-05	-0.655851	Downregulated	SA-E vs SA
TRINITY_DN190_c0_g1_i1	43	17	0.00297647	0.827404	Upregulated	SA-E vs SA
TRINITY_DN191_c0_g1_i1	191	7	0.000955102	-1.05037	Downregulated	SA-E vs SA
TRINITY_DN191_c0_g2_i1	26393	6935	2.09472e-07	0.504862	Upregulated	SA-E vs SA
TRINITY_DN192_c0_g1_i6	684.95	29.96	3.31582e-06	-0.910715	Downregulated	SA-E vs SA
TRINITY_DN1922_c0_g2_i4	292.84	14.97	0.00256355	-0.787626	Downregulated	SA-E vs SA
TRINITY_DN1922_c0_g3_i1	482	36	0.0244137	-0.488278	Downregulated	SA-E vs SA
TRINITY_DN1922_c1_g1_i1	249	50	0.0363184	0.292551	Upregulated	SA-E vs SA
TRINITY_DN1929_c0_g1_i1	146	31	0.0442535	0.336614	Upregulated	SA-E vs SA
TRINITY_DN193_c0_g1_i1	1202.84	103.7	0.0379448	-0.374993	Downregulated	SA-E vs SA
TRINITY_DN193_c0_g1_i21	52.19	69.4	3.83985e-21	1.78508	Upregulated	SA-E vs SA
TRINITY_DN193_c0_g1_i4	304.78	84.69	4.25206e-05	0.549016	Upregulated	SA-E vs SA
TRINITY_DN193_c0_g1_i9	3548.15	106.42	5.18098e-17	-1.2086	Downregulated	SA-E vs SA
TRINITY_DN193_c0_g2_i1	103.38	23.78	0.0385652	0.399818	Upregulated	SA-E vs SA
TRINITY_DN193_c0_g2_i2	275.62	20.22	0.0490724	-0.502431	Downregulated	SA-E vs SA
TRINITY_DN1933_c0_g2_i2	231	5	1.08685e-05	-1.46614	Downregulated	SA-E vs SA
TRINITY_DN1933_c1_g1_i1	137.78	7	0.0259642	-0.792497	Downregulated	SA-E vs SA
TRINITY_DN19354_c0_g1_i1	13	16	1.27658e-06	1.724	Upregulated	SA-E vs SA
TRINITY_DN1948_c0_g1_i1	2.53	17	3.94049e-08	3.06409	Upregulated	SA-E vs SA
TRINITY_DN195_c0_g1_i2	480	25	0.000365564	-0.772887	Downregulated	SA-E vs SA
TRINITY_DN195_c0_g2_i1	275	14	0.00240773	-0.790891	Downregulated	SA-E vs SA
TRINITY_DN1956_c0_g2_i1	329	10	6.41991e-06	-1.19809	Downregulated	SA-E vs SA
TRINITY_DN1980_c0_g1_i1	9	23	1.63617e-11	2.30085	Upregulated	SA-E vs SA
TRINITY_DN1982_c0_g1_i1	274	16	0.00922011	-0.682589	Downregulated	SA-E vs SA
TRINITY_DN19847_c0_g1_i1	76	24	0.00371809	0.650005	Upregulated	SA-E vs SA
TRINITY_DN1988_c1_g1_i1	814	36	1.15699e-06	-0.901998	Downregulated	SA-E vs SA
TRINITY_DN1990_c0_g1_i1	28.95	18.01	8.39027e-05	1.18533	Upregulated	SA-E vs SA
TRINITY_DN1990_c0_g1_i2	2517.01	160.11	3.731e-05	-0.615028	Downregulated	SA-E vs SA
TRINITY_DN1990_c0_g1_i7	2.87978e+06	46693.2	8.24335e-41	-1.69422	Downregulated	SA-E vs SA
TRINITY_DN1990_c0_g2_i1	86	1	0.00127928	-1.95672	Downregulated	SA-E vs SA
TRINITY_DN1995_c1_g1_i1	48	15	0.0197076	0.641738	Upregulated	SA-E vs SA
TRINITY_DN1996_c0_g1_i3	22.44	31.49	6.60497e-12	1.82757	Upregulated	SA-E vs SA
TRINITY_DN1996_c0_g1_i5	28.56	12.51	0.00401524	0.908336	Upregulated	SA-E vs SA
TRINITY_DN1996_c1_g1_i2	53	32	2.00478e-07	1.16171	Upregulated	SA-E vs SA
TRINITY_DN1998_c0_g1_i1	219	11	0.00582604	-0.80152	Downregulated	SA-E vs SA
TRINITY_DN2_c0_g1_i1	6185.57	571.67	0.0450852	-0.320101	Downregulated	SA-E vs SA
TRINITY_DN2_c0_g5_i1	41615.4	2644.33	3.04553e-06	-0.615886	Downregulated	SA-E vs SA
TRINITY_DN2009_c2_g1_i2	26	11	0.0173117	0.880922	Upregulated	SA-E vs SA
TRINITY_DN201_c0_g4_i1	2227.67	199	0.038633	-0.34694	Downregulated	SA-E vs SA
TRINITY_DN2010_c0_g1_i1	149	45	0.000258465	0.61479	Upregulated	SA-E vs SA
TRINITY_DN2019_c0_g1_i2	43	22	7.67142e-05	1.03096	Upregulated	SA-E vs SA
TRINITY_DN2027_c0_g1_i2	16.51	20	1.27111e-07	1.71147	Upregulated	SA-E vs SA
TRINITY_DN203_c0_g2_i2	542.1	42.79	0.0363682	-0.444634	Downregulated	SA-E vs SA
TRINITY_DN203_c0_g2_i3	73.9	71.21	1.38722e-17	1.53079	Upregulated	SA-E vs SA
TRINITY_DN203_c0_g3_i1	554	41	0.0163921	-0.495516	Downregulated	SA-E vs SA
TRINITY_DN20336_c0_g1_i1	201.34	9.02	0.00410751	-0.89182	Downregulated	SA-E vs SA
TRINITY_DN20336_c0_g1_i3	12.66	16.98	4.53154e-07	1.79186	Upregulated	SA-E vs SA
TRINITY_DN2042_c0_g1_i2	1370.35	30.75	6.02637e-16	-1.43768	Downregulated	SA-E vs SA
TRINITY_DN2042_c0_g1_i3	1316.65	311.25	4.81269e-05	0.421385	Upregulated	SA-E vs SA
TRINITY_DN2042_c0_g2_i1	220	5	1.77254e-05	-1.42762	Downregulated	SA-E vs SA
TRINITY_DN2042_c0_g3_i1	3540	298	0.0112338	-0.393823	Downregulated	SA-E vs SA
TRINITY_DN2042_c1_g1_i2	1463.04	282.64	0.0052995	0.262022	Upregulated	SA-E vs SA
TRINITY_DN2042_c1_g1_i3	1775.32	6.36	2.28535e-38	-2.88627	Downregulated	SA-E vs SA
TRINITY_DN2045_c0_g2_i1	2595	104	3.37981e-11	-0.979773	Downregulated	SA-E vs SA
TRINITY_DN2087_c0_g1_i9	471.47	18	5.38272e-06	-1.01809	Downregulated	SA-E vs SA
TRINITY_DN21_c0_g2_i1	126	2	0.000219377	-1.71101	Downregulated	SA-E vs SA
TRINITY_DN210_c0_g1_i2	674	26	3.69757e-07	-1.00992	Downregulated	SA-E vs SA
TRINITY_DN211_c0_g1_i2	19	14	0.000200837	1.31896	Upregulated	SA-E vs SA
TRINITY_DN211_c0_g1_i3	466	22	0.000103428	-0.850444	Downregulated	SA-E vs SA
TRINITY_DN211_c0_g2_i1	25	13	0.00190528	1.04378	Upregulated	SA-E vs SA
TRINITY_DN211_c0_g3_i1	108	2	0.0011366	-1.58931	Downregulated	SA-E vs SA
TRINITY_DN21196_c0_g1_i1	15	30	2.7628e-13	2.10732	Upregulated	SA-E vs SA
TRINITY_DN21196_c0_g2_i1	298	113	3.88733e-09	0.794467	Upregulated	SA-E vs SA
TRINITY_DN212_c1_g1_i8	221	9	0.00142836	-0.967131	Downregulated	SA-E vs SA
TRINITY_DN212_c1_g2_i1	1007.03	5	1.15768e-25	-2.62858	Downregulated	SA-E vs SA
TRINITY_DN2132_c0_g2_i2	842.53	183.14	0.000835427	0.355137	Upregulated	SA-E vs SA
TRINITY_DN2132_c0_g2_i3	1568.12	53.86	1.58452e-11	-1.10159	Downregulated	SA-E vs SA
TRINITY_DN2132_c0_g4_i3	114	1.72	0.000793692	-1.75107	Downregulated	SA-E vs SA
TRINITY_DN2132_c1_g1_i1	173	9	0.0186462	-0.773801	Downregulated	SA-E vs SA
TRINITY_DN2142_c0_g2_i1	51	20	0.00104138	0.821004	Upregulated	SA-E vs SA
TRINITY_DN2145_c0_g1_i1	51	24	8.41695e-05	0.96495	Upregulated	SA-E vs SA
TRINITY_DN2147_c0_g2_i2	346.44	125.45	7.10591e-09	0.758072	Upregulated	SA-E vs SA
TRINITY_DN2147_c0_g3_i1	106	29	0.00482304	0.536738	Upregulated	SA-E vs SA
TRINITY_DN2147_c1_g1_i1	111	3	0.00432459	-1.29082	Downregulated	SA-E vs SA
TRINITY_DN2150_c1_g1_i1	111	1	0.000148835	-2.15819	Downregulated	SA-E vs SA
TRINITY_DN2158_c0_g1_i1	221	52	0.00486899	0.417698	Upregulated	SA-E vs SA
TRINITY_DN216_c0_g1_i4	3403.41	8	1.43669e-55	-3.21896	Downregulated	SA-E vs SA
TRINITY_DN2173_c0_g1_i3	1167.51	390.37	3.21921e-10	0.695123	Upregulated	SA-E vs SA
TRINITY_DN2173_c0_g5_i1	230	9	0.000638974	-0.998645	Downregulated	SA-E vs SA
TRINITY_DN21883_c1_g1_i1	261	17	0.022783	-0.596349	Downregulated	SA-E vs SA
TRINITY_DN2189_c0_g1_i1	167	78	6.3882e-10	0.959018	Upregulated	SA-E vs SA
TRINITY_DN2204_c0_g2_i1	407	19	0.000161883	-0.859311	Downregulated	SA-E vs SA
TRINITY_DN221_c0_g1_i10	29.65	16	0.00040416	1.07303	Upregulated	SA-E vs SA
TRINITY_DN221_c0_g1_i4	2171.32	169.05	0.00401801	-0.45549	Downregulated	SA-E vs SA
TRINITY_DN2213_c0_g1_i1	160	8	0.0170933	-0.805117	Downregulated	SA-E vs SA
TRINITY_DN222_c0_g1_i5	16	70	5.55015e-29	2.72532	Upregulated	SA-E vs SA
TRINITY_DN222_c1_g2_i1	40	13	0.0211185	0.672704	Upregulated	SA-E vs SA
TRINITY_DN2256_c0_g1_i1	732.27	61	0.041639	-0.402102	Downregulated	SA-E vs SA
TRINITY_DN226_c0_g2_i5	110.68	4	0.0107729	-1.06141	Downregulated	SA-E vs SA
TRINITY_DN2262_c0_g1_i1	158	5	0.00139668	-1.16626	Downregulated	SA-E vs SA
TRINITY_DN227_c0_g1_i2	73	26	0.000896798	0.744998	Upregulated	SA-E vs SA
TRINITY_DN2270_c0_g1_i1	13104	1079	0.00446847	-0.411267	Downregulated	SA-E vs SA
TRINITY_DN2292_c0_g1_i1	311	69	0.00518841	0.3713	Upregulated	SA-E vs SA
TRINITY_DN230_c0_g4_i4	18253.5	596.76	7.47187e-19	-1.14056	Downregulated	SA-E vs SA
TRINITY_DN230_c0_g5_i1	55	20	0.00225486	0.76139	Upregulated	SA-E vs SA
TRINITY_DN230_c1_g1_i1	183	1	1.43189e-07	-2.55291	Downregulated	SA-E vs SA
TRINITY_DN2320_c0_g1_i1	109	52	3.89728e-08	0.975741	Upregulated	SA-E vs SA
TRINITY_DN23236_c0_g1_i1	5	21	4.26767e-10	2.69309	Upregulated	SA-E vs SA
TRINITY_DN2331_c0_g1_i1	175	68	1.94613e-07	0.813752	Upregulated	SA-E vs SA
TRINITY_DN2339_c0_g1_i1	1721	120	0.000655122	-0.542553	Downregulated	SA-E vs SA
TRINITY_DN2339_c0_g2_i1	912	73	0.0192739	-0.433608	Downregulated	SA-E vs SA
TRINITY_DN2344_c0_g1_i2	160	8	0.0170933	-0.805117	Downregulated	SA-E vs SA
TRINITY_DN2348_c0_g1_i2	36.53	17	0.00122165	0.956148	Upregulated	SA-E vs SA
TRINITY_DN2356_c0_g3_i2	1905.31	155	0.00996208	-0.420814	Downregulated	SA-E vs SA
TRINITY_DN2356_c0_g4_i1	99	3	0.00843262	-1.20049	Downregulated	SA-E vs SA
TRINITY_DN2357_c1_g2_i1	347	24	0.022107	-0.548949	Downregulated	SA-E vs SA
TRINITY_DN236_c0_g1_i1	402.23	148.83	9.37794e-10	0.775113	Upregulated	SA-E vs SA
TRINITY_DN236_c0_g1_i3	225.5	0.87	4.35654e-09	-2.82774	Downregulated	SA-E vs SA
TRINITY_DN236_c0_g1_i5	1592.77	1.26	5.88161e-43	-4.07876	Downregulated	SA-E vs SA
TRINITY_DN236_c0_g1_i6	2835.81	216.48	0.00193751	-0.471035	Downregulated	SA-E vs SA
TRINITY_DN236_c0_g1_i7	1332.7	261.55	0.0041691	0.274466	Upregulated	SA-E vs SA
TRINITY_DN236_c1_g2_i1	171	1	7.70411e-07	-2.49937	Downregulated	SA-E vs SA
TRINITY_DN2360_c1_g1_i3	96	23	0.0397958	0.431961	Upregulated	SA-E vs SA
TRINITY_DN2365_c0_g1_i1	503.19	36.09	0.013914	-0.520275	Downregulated	SA-E vs SA
TRINITY_DN2365_c0_g1_i2	50.81	15.91	0.0175335	0.643322	Upregulated	SA-E vs SA
TRINITY_DN2368_c0_g1_i1	432	88	0.0102164	0.303874	Upregulated	SA-E vs SA
TRINITY_DN2368_c1_g2_i1	779	33	7.30971e-07	-0.935996	Downregulated	SA-E vs SA
TRINITY_DN2383_c1_g1_i1	129.46	6.35	0.0236484	-0.820264	Downregulated	SA-E vs SA
TRINITY_DN2383_c1_g1_i2	2010.54	126.65	5.37295e-05	-0.622738	Downregulated	SA-E vs SA
TRINITY_DN240_c0_g2_i10	1237.59	28.52	7.84644e-15	-1.41666	Downregulated	SA-E vs SA
TRINITY_DN240_c0_g2_i3	1403.04	85.35	5.95132e-05	-0.650296	Downregulated	SA-E vs SA
TRINITY_DN24057_c0_g1_i1	197	11	0.0180774	-0.717935	Downregulated	SA-E vs SA
TRINITY_DN241_c0_g1_i1	523.14	40.02	0.0250017	-0.469365	Downregulated	SA-E vs SA
TRINITY_DN241_c0_g1_i3	774.5	33.3	9.05101e-07	-0.924277	Downregulated	SA-E vs SA
TRINITY_DN241_c0_g1_i5	381.94	25.44	0.00988945	-0.57869	Downregulated	SA-E vs SA
TRINITY_DN2414_c0_g1_i4	173.88	43	0.00518753	0.45698	Upregulated	SA-E vs SA
TRINITY_DN242_c0_g3_i1	90	2	0.00440277	-1.44536	Downregulated	SA-E vs SA
TRINITY_DN243_c0_g1_i7	147.1	4	0.00100613	-1.286	Downregulated	SA-E vs SA
TRINITY_DN2435_c0_g1_i2	2802	1034.38	3.1717e-13	0.773287	Upregulated	SA-E vs SA
TRINITY_DN2435_c1_g2_i1	360	26	0.0316144	-0.514792	Downregulated	SA-E vs SA
TRINITY_DN2447_c0_g1_i1	392	16	3.80025e-05	-0.965342	Downregulated	SA-E vs SA
TRINITY_DN2472_c0_g1_i1	5279	460	0.0173634	-0.366566	Downregulated	SA-E vs SA
TRINITY_DN2473_c0_g1_i3	324.39	78.23	0.000939581	0.437141	Upregulated	SA-E vs SA
TRINITY_DN2473_c0_g2_i4	157.33	45.77	0.00038332	0.585236	Upregulated	SA-E vs SA
TRINITY_DN2478_c0_g2_i1	519	22	1.33286e-05	-0.935489	Downregulated	SA-E vs SA
TRINITY_DN2479_c0_g1_i1	111	72	4.8131e-13	1.21831	Upregulated	SA-E vs SA
TRINITY_DN2485_c0_g1_i3	12128	2132.26	0.0166716	0.187622	Upregulated	SA-E vs SA
TRINITY_DN2485_c0_g1_i6	5091.82	983.77	0.00272331	0.262101	Upregulated	SA-E vs SA
TRINITY_DN2485_c0_g1_i9	6611.81	502.64	0.000968613	-0.474314	Downregulated	SA-E vs SA
TRINITY_DN2485_c1_g1_i1	657	38	0.000409392	-0.690136	Downregulated	SA-E vs SA
TRINITY_DN24985_c0_g1_i1	79	32	4.93146e-05	0.84657	Upregulated	SA-E vs SA
TRINITY_DN250_c0_g1_i5	81.82	21.11	0.0318622	0.490448	Upregulated	SA-E vs SA
TRINITY_DN25070_c0_g1_i1	108	2	0.0011366	-1.58931	Downregulated	SA-E vs SA
TRINITY_DN2516_c0_g2_i1	871	35	1.08629e-07	-0.977675	Downregulated	SA-E vs SA
TRINITY_DN2530_c0_g1_i1	16	11	0.00106861	1.26424	Upregulated	SA-E vs SA
TRINITY_DN254_c0_g1_i4	7	15	7.04324e-08	2.16179	Upregulated	SA-E vs SA
TRINITY_DN2545_c1_g1_i1	162	6	0.00249928	-1.04205	Downregulated	SA-E vs SA
TRINITY_DN2546_c0_g1_i1	7551.53	372.36	1.06793e-09	-0.816101	Downregulated	SA-E vs SA
TRINITY_DN2546_c0_g1_i11	987.04	287.06	1.2229e-07	0.584997	Upregulated	SA-E vs SA
TRINITY_DN2546_c0_g1_i12	12211	709.62	2.57125e-07	-0.6864	Downregulated	SA-E vs SA
TRINITY_DN2546_c0_g1_i15	284.39	133.95	9.0002e-13	0.965654	Upregulated	SA-E vs SA
TRINITY_DN2546_c2_g1_i1	408	20	0.000338416	-0.820752	Downregulated	SA-E vs SA
TRINITY_DN255_c0_g1_i3	31	193	1.13093e-61	3.00386	Upregulated	SA-E vs SA
TRINITY_DN2552_c0_g1_i1	360	12	7.83098e-06	-1.12524	Downregulated	SA-E vs SA
TRINITY_DN2561_c1_g2_i1	27	17	0.000112452	1.19482	Upregulated	SA-E vs SA
TRINITY_DN2564_c0_g1_i1	93	25	0.0102955	0.522858	Upregulated	SA-E vs SA
TRINITY_DN257_c0_g1_i1	96.32	2.81	0.0112329	-1.23048	Downregulated	SA-E vs SA
TRINITY_DN257_c0_g1_i2	1893	144.19	0.00303336	-0.472773	Downregulated	SA-E vs SA
TRINITY_DN2574_c0_g2_i1	583	43	0.0135612	-0.498196	Downregulated	SA-E vs SA
TRINITY_DN2574_c0_g3_i2	358	86	0.000742971	0.434068	Upregulated	SA-E vs SA
TRINITY_DN2574_c0_g4_i1	7178	612	0.0105225	-0.383761	Downregulated	SA-E vs SA
TRINITY_DN2598_c0_g1_i4	1206.29	70.07	3.70713e-05	-0.686751	Downregulated	SA-E vs SA
TRINITY_DN2598_c0_g1_i5	26.96	32.39	6.06272e-11	1.70494	Upregulated	SA-E vs SA
TRINITY_DN260_c0_g1_i1	19346.4	738.8	2.35517e-15	-1.01789	Downregulated	SA-E vs SA
TRINITY_DN260_c0_g1_i3	2091.97	180.53	0.0245263	-0.374224	Downregulated	SA-E vs SA
TRINITY_DN26074_c0_g1_i1	20	10	0.00962572	1.01281	Upregulated	SA-E vs SA
TRINITY_DN2608_c0_g2_i1	111	31	0.00410751	0.553003	Upregulated	SA-E vs SA
TRINITY_DN261_c0_g2_i1	353	26	0.0372991	-0.499289	Downregulated	SA-E vs SA
TRINITY_DN261_c0_g3_i1	6919.71	633.34	0.0370092	-0.327766	Downregulated	SA-E vs SA
TRINITY_DN26170_c0_g1_i1	17	10	0.00268218	1.14113	Upregulated	SA-E vs SA
TRINITY_DN26179_c0_g1_i1	184	40	0.0230951	0.355218	Upregulated	SA-E vs SA
TRINITY_DN2618_c0_g1_i1	238	15	0.0257956	-0.622334	Downregulated	SA-E vs SA
TRINITY_DN26193_c0_g1_i1	108	26	0.026396	0.435766	Upregulated	SA-E vs SA
TRINITY_DN26241_c0_g1_i1	57	20	0.00366341	0.733189	Upregulated	SA-E vs SA
TRINITY_DN26273_c0_g1_i1	15	9	0.00664724	1.15676	Upregulated	SA-E vs SA
TRINITY_DN263_c1_g2_i3	3086.36	264	0.0162975	-0.381198	Downregulated	SA-E vs SA
TRINITY_DN26307_c0_g1_i1	32	11	0.0370978	0.716987	Upregulated	SA-E vs SA
TRINITY_DN26363_c0_g1_i1	54	16	0.020365	0.599701	Upregulated	SA-E vs SA
TRINITY_DN264_c0_g1_i5	235	47	0.040933	0.289387	Upregulated	SA-E vs SA
TRINITY_DN264_c0_g1_i8	220	50	0.00796422	0.390313	Upregulated	SA-E vs SA
TRINITY_DN26453_c0_g1_i1	146	8	0.0410741	-0.732823	Downregulated	SA-E vs SA
TRINITY_DN26483_c0_g1_i1	118	32	0.00570313	0.529786	Upregulated	SA-E vs SA
TRINITY_DN26497_c0_g1_i1	345	19	0.00257805	-0.728828	Downregulated	SA-E vs SA
TRINITY_DN2652_c0_g2_i1	15	15	1.05674e-05	1.56007	Upregulated	SA-E vs SA
TRINITY_DN26583_c0_g1_i1	500	22	2.65057e-05	-0.906044	Downregulated	SA-E vs SA
TRINITY_DN266_c0_g2_i2	1093.66	96.41	0.0496604	-0.357416	Downregulated	SA-E vs SA
TRINITY_DN266_c0_g3_i1	639	37	0.000448848	-0.689259	Downregulated	SA-E vs SA
TRINITY_DN2666_c0_g1_i1	8134.84	524.25	9.9885e-06	-0.604746	Downregulated	SA-E vs SA
TRINITY_DN2666_c0_g1_i2	4493.16	1111.75	2.92866e-06	0.457409	Upregulated	SA-E vs SA
TRINITY_DN2666_c1_g1_i2	439	80.96	0.0444547	0.225352	Upregulated	SA-E vs SA
TRINITY_DN2668_c0_g1_i1	52	1	0.0397031	-1.55951	Downregulated	SA-E vs SA
TRINITY_DN267_c0_g1_i8	61	19	0.00749061	0.639145	Upregulated	SA-E vs SA
TRINITY_DN2673_c0_g1_i2	531.86	41	0.0273317	-0.463316	Downregulated	SA-E vs SA
TRINITY_DN26731_c0_g1_i1	12	11	0.000143701	1.49137	Upregulated	SA-E vs SA
TRINITY_DN2674_c2_g1_i2	71.41	24.25	0.00159636	0.70737	Upregulated	SA-E vs SA
TRINITY_DN2686_c0_g1_i1	76	1	0.00381958	-1.85912	Downregulated	SA-E vs SA
TRINITY_DN2693_c3_g1_i1	52	16	0.0133442	0.629497	Upregulated	SA-E vs SA
TRINITY_DN2694_c0_g1_i1	456.69	18.22	1.14179e-05	-0.983353	Downregulated	SA-E vs SA
TRINITY_DN26952_c0_g1_i1	106	115	4.5814e-25	1.62441	Upregulated	SA-E vs SA
TRINITY_DN26969_c0_g1_i1	774	2535	1.47521e-82	2.49673	Upregulated	SA-E vs SA
TRINITY_DN26972_c0_g1_i1	96	33	0.00030576	0.716987	Upregulated	SA-E vs SA
TRINITY_DN270_c0_g1_i2	1350	458	1.03151e-10	0.706605	Upregulated	SA-E vs SA
TRINITY_DN27088_c0_g1_i1	17	8	0.0231566	0.96495	Upregulated	SA-E vs SA
TRINITY_DN272_c0_g1_i1	605.95	123.99	0.00535196	0.30742	Upregulated	SA-E vs SA
TRINITY_DN272_c0_g1_i2	15088.6	1290.36	0.00943844	-0.381374	Downregulated	SA-E vs SA
TRINITY_DN272_c0_g1_i4	2817.41	121.65	3.35329e-10	-0.920934	Downregulated	SA-E vs SA
TRINITY_DN27420_c0_g1_i1	166	9	0.0269419	-0.74119	Downregulated	SA-E vs SA
TRINITY_DN2746_c0_g2_i2	304	19	0.0119081	-0.628941	Downregulated	SA-E vs SA
TRINITY_DN275_c0_g1_i6	1448.41	51.34	5.69721e-11	-1.07673	Downregulated	SA-E vs SA
TRINITY_DN2752_c0_g1_i1	65.9	21.19	0.00619366	0.664272	Upregulated	SA-E vs SA
TRINITY_DN27561_c0_g1_i1	23	16	9.82733e-05	1.27355	Upregulated	SA-E vs SA
TRINITY_DN2758_c0_g1_i3	145.56	45	0.000224833	0.633231	Upregulated	SA-E vs SA
TRINITY_DN2758_c0_g2_i1	1067	239	0.000283242	0.378835	Upregulated	SA-E vs SA
TRINITY_DN276_c0_g1_i3	443.15	205.57	1.61877e-14	0.953621	Upregulated	SA-E vs SA
TRINITY_DN276_c0_g1_i6	388.37	71.51	0.047285	0.224107	Upregulated	SA-E vs SA
TRINITY_DN276_c0_g3_i1	35	19	0.000205848	1.07774	Upregulated	SA-E vs SA
TRINITY_DN276_c1_g1_i1	110	2	0.00149235	-1.60379	Downregulated	SA-E vs SA
TRINITY_DN27686_c0_g1_i1	32	19	3.79475e-05	1.14849	Upregulated	SA-E vs SA
TRINITY_DN2774_c0_g1_i2	26.66	26	2.81996e-08	1.54027	Upregulated	SA-E vs SA
TRINITY_DN27754_c0_g1_i1	36	12	0.023845	0.692693	Upregulated	SA-E vs SA
TRINITY_DN2777_c0_g1_i1	17.99	8.21	0.0231566	0.940719	Upregulated	SA-E vs SA
TRINITY_DN2778_c0_g1_i2	15	12.41	0.000206996	1.41041	Upregulated	SA-E vs SA
TRINITY_DN2779_c0_g2_i3	183	5	0.000228795	-1.28223	Downregulated	SA-E vs SA
TRINITY_DN27794_c0_g1_i1	4	14	7.44748e-07	2.54914	Upregulated	SA-E vs SA
TRINITY_DN278_c0_g1_i2	940.92	35.64	2.09721e-08	-1.02433	Downregulated	SA-E vs SA
TRINITY_DN278_c0_g1_i3	0.08	40.36	5.93548e-17	6.47367	Upregulated	SA-E vs SA
TRINITY_DN2782_c1_g1_i1	210	11	0.00988045	-0.768389	Downregulated	SA-E vs SA
TRINITY_DN27863_c0_g1_i1	73	27	0.000329839	0.774794	Upregulated	SA-E vs SA
TRINITY_DN27875_c0_g1_i1	14	11	0.000556462	1.36966	Upregulated	SA-E vs SA
TRINITY_DN2788_c0_g2_i1	87	2	0.00834208	-1.41859	Downregulated	SA-E vs SA
TRINITY_DN2789_c0_g4_i1	962	72	0.00698974	-0.486638	Downregulated	SA-E vs SA
TRINITY_DN280_c0_g1_i1	235	1	1.67695e-09	-2.75037	Downregulated	SA-E vs SA
TRINITY_DN28048_c0_g1_i1	145	4	0.00131234	-1.27465	Downregulated	SA-E vs SA
TRINITY_DN281_c1_g1_i4	2898.65	215.66	0.00119641	-0.491335	Downregulated	SA-E vs SA
TRINITY_DN28109_c0_g1_i1	62	18	0.0185387	0.58362	Upregulated	SA-E vs SA
TRINITY_DN2813_c0_g1_i2	169.88	56	2.5868e-05	0.683906	Upregulated	SA-E vs SA
TRINITY_DN286_c0_g2_i1	134	7	0.0389822	-0.770534	Downregulated	SA-E vs SA
TRINITY_DN286_c0_g3_i1	2545	211	0.010723	-0.405854	Downregulated	SA-E vs SA
TRINITY_DN286_c0_g5_i1	61	20	0.00441553	0.679642	Upregulated	SA-E vs SA
TRINITY_DN2861_c0_g1_i3	487.68	31.9	0.00570918	-0.59299	Downregulated	SA-E vs SA
TRINITY_DN287_c0_g1_i1	1644	324	0.00320714	0.277776	Upregulated	SA-E vs SA
TRINITY_DN28741_c0_g1_i1	80	1	0.00266073	-1.89962	Downregulated	SA-E vs SA
TRINITY_DN28767_c0_g1_i1	30	12	0.0110484	0.836639	Upregulated	SA-E vs SA
TRINITY_DN28812_c0_g1_i1	14	7	0.0384743	1.01281	Upregulated	SA-E vs SA
TRINITY_DN29_c0_g1_i11	1475	7	2.31307e-32	-2.66425	Downregulated	SA-E vs SA
TRINITY_DN29_c0_g1_i8	125	1	5.41541e-05	-2.25197	Downregulated	SA-E vs SA
TRINITY_DN2907_c0_g1_i1	76	2	0.0174197	-1.31187	Downregulated	SA-E vs SA
TRINITY_DN292_c0_g1_i10	628	130	0.00404553	0.316572	Upregulated	SA-E vs SA
TRINITY_DN292_c0_g1_i4	29565	5309.89	0.0103566	0.204448	Upregulated	SA-E vs SA
TRINITY_DN292_c1_g1_i3	1283.96	280.3	0.00039986	0.358544	Upregulated	SA-E vs SA
TRINITY_DN292_c1_g1_i4	1006.1	187.7	0.0140323	0.234473	Upregulated	SA-E vs SA
TRINITY_DN29270_c0_g1_i1	12	9	0.00394482	1.33294	Upregulated	SA-E vs SA
TRINITY_DN2975_c0_g1_i1	205	56	0.000458967	0.535542	Upregulated	SA-E vs SA
TRINITY_DN298_c0_g1_i1	1525.29	262.76	0.0400406	0.171543	Upregulated	SA-E vs SA
TRINITY_DN298_c0_g1_i3	217.46	61.35	0.000174519	0.560995	Upregulated	SA-E vs SA
TRINITY_DN298_c0_g1_i6	768.73	152.65	0.00587487	0.283738	Upregulated	SA-E vs SA
TRINITY_DN298_c0_g2_i1	86.7	25.43	0.00655998	0.591704	Upregulated	SA-E vs SA
TRINITY_DN299_c0_g1_i2	2789.91	186.68	0.000118394	-0.57508	Downregulated	SA-E vs SA
TRINITY_DN2996_c0_g1_i1	815	54	0.00145735	-0.582846	Downregulated	SA-E vs SA
TRINITY_DN2997_c0_g1_i1	519	42	0.0483803	-0.424966	Downregulated	SA-E vs SA
TRINITY_DN300_c0_g1_i2	161.13	4	0.000430601	-1.35793	Downregulated	SA-E vs SA
TRINITY_DN3001_c0_g2_i1	355	74	0.00998829	0.322061	Upregulated	SA-E vs SA
TRINITY_DN3022_c0_g2_i2	24.32	10.33	0.0191693	0.884044	Upregulated	SA-E vs SA
TRINITY_DN3023_c0_g1_i1	189	3	6.47655e-06	-1.71101	Downregulated	SA-E vs SA
TRINITY_DN3035_c0_g1_i1	366	6	3.33522e-09	-1.68554	Downregulated	SA-E vs SA
TRINITY_DN304_c0_g1_i1	283.98	19	0.0243483	-0.575156	Downregulated	SA-E vs SA
TRINITY_DN306_c0_g1_i3	27.05	13	0.00401524	0.981557	Upregulated	SA-E vs SA
TRINITY_DN3068_c0_g1_i2	272.44	15.15	0.00684828	-0.72118	Downregulated	SA-E vs SA
TRINITY_DN30884_c0_g1_i1	5	16	3.94049e-08	2.47839	Upregulated	SA-E vs SA
TRINITY_DN30888_c0_g1_i1	24	10	0.0191693	0.868868	Upregulated	SA-E vs SA
TRINITY_DN309_c0_g2_i3	718.72	27.96	3.2171e-07	-1.00326	Downregulated	SA-E vs SA
TRINITY_DN309_c0_g2_i4	635.62	33.29	8.93868e-05	-0.768493	Downregulated	SA-E vs SA
TRINITY_DN309_c0_g2_i6	240.35	77.12	3.95784e-06	0.662595	Upregulated	SA-E vs SA
TRINITY_DN3096_c0_g1_i2	193	8.17	0.00283689	-0.936563	Downregulated	SA-E vs SA
TRINITY_DN3096_c0_g2_i1	341.22	86	0.000310763	0.471969	Upregulated	SA-E vs SA
TRINITY_DN3096_c0_g2_i2	403.35	15	1.06385e-05	-1.03883	Downregulated	SA-E vs SA
TRINITY_DN31_c0_g1_i11	1934.13	33.44	2.23568e-22	-1.64353	Downregulated	SA-E vs SA
TRINITY_DN31_c0_g1_i17	2863.81	2.29	6.34805e-58	-4.07026	Downregulated	SA-E vs SA
TRINITY_DN31_c0_g1_i3	8841.39	13.93	1.14487e-83	-3.53481	Downregulated	SA-E vs SA
TRINITY_DN31_c0_g1_i7	1049.56	52.38	2.42865e-06	-0.806593	Downregulated	SA-E vs SA
TRINITY_DN310_c0_g1_i1	8887	2264	7.98327e-07	0.480435	Upregulated	SA-E vs SA
TRINITY_DN31017_c0_g1_i2	26719.1	5952.04	4.96312e-05	0.374493	Upregulated	SA-E vs SA
TRINITY_DN311_c0_g1_i1	4615.13	6652.71	5.47157e-55	1.84878	Upregulated	SA-E vs SA
TRINITY_DN311_c0_g1_i10	4273.98	0.01	2.87855e-75	-8.67632	Downregulated	SA-E vs SA
TRINITY_DN311_c0_g1_i4	3726.02	250.92	8.5105e-05	-0.570022	Downregulated	SA-E vs SA
TRINITY_DN311_c0_g2_i1	103	1	0.000205848	-2.09913	Downregulated	SA-E vs SA
TRINITY_DN311_c0_g3_i1	1215	72	5.98788e-05	-0.670979	Downregulated	SA-E vs SA
TRINITY_DN31106_c0_g1_i1	45	21	0.000218753	0.958343	Upregulated	SA-E vs SA
TRINITY_DN31185_c0_g1_i2	63	152	1.17683e-43	2.25543	Upregulated	SA-E vs SA
TRINITY_DN3122_c1_g1_i1	92	4	0.0438256	-0.915461	Downregulated	SA-E vs SA
TRINITY_DN31369_c0_g1_i1	81	3	0.0387935	-1.04205	Downregulated	SA-E vs SA
TRINITY_DN3150_c0_g1_i1	115	33	0.00212081	0.574413	Upregulated	SA-E vs SA
TRINITY_DN3150_c1_g1_i1	130	5	0.00921389	-1.01226	Downregulated	SA-E vs SA
TRINITY_DN31559_c0_g1_i1	144	3	0.000282516	-1.49631	Downregulated	SA-E vs SA
TRINITY_DN3199_c0_g1_i1	193	10	0.0097493	-0.776989	Downregulated	SA-E vs SA
TRINITY_DN32139_c0_g1_i1	20	8	0.0452806	0.836639	Upregulated	SA-E vs SA
TRINITY_DN3219_c0_g1_i1	269	12	0.000832786	-0.895179	Downregulated	SA-E vs SA
TRINITY_DN3219_c0_g2_i1	276	6	1.74099e-06	-1.46271	Downregulated	SA-E vs SA
TRINITY_DN3220_c0_g1_i2	56.9	40	2.43818e-09	1.28183	Upregulated	SA-E vs SA
TRINITY_DN3220_c0_g2_i2	23082.6	1569	2.91753e-05	-0.562662	Downregulated	SA-E vs SA
TRINITY_DN3220_c1_g1_i1	686	52	0.0147143	-0.4766	Downregulated	SA-E vs SA
TRINITY_DN3222_c0_g1_i1	1152	72	0.000194154	-0.628941	Downregulated	SA-E vs SA
TRINITY_DN323_c0_g1_i1	65	19	0.0165779	0.589	Upregulated	SA-E vs SA
TRINITY_DN323_c0_g2_i1	626	134	0.00210712	0.343017	Upregulated	SA-E vs SA
TRINITY_DN323_c0_g4_i1	1381.46	67.42	3.83223e-07	-0.824241	Downregulated	SA-E vs SA
TRINITY_DN323_c0_g4_i2	3440.89	805.64	2.01321e-05	0.413806	Upregulated	SA-E vs SA
TRINITY_DN323_c0_g4_i3	48.65	17.94	0.00349787	0.772429	Upregulated	SA-E vs SA
TRINITY_DN323_c0_g5_i1	246	11	0.00171123	-0.893309	Downregulated	SA-E vs SA
TRINITY_DN3230_c0_g1_i1	775	58	0.00991348	-0.486695	Downregulated	SA-E vs SA
TRINITY_DN32393_c0_g1_i1	65	26	0.000267908	0.836639	Upregulated	SA-E vs SA
TRINITY_DN324_c0_g1_i2	671.83	55.29	0.0373484	-0.411685	Downregulated	SA-E vs SA
TRINITY_DN324_c0_g2_i1	75	26	0.000896798	0.723658	Upregulated	SA-E vs SA
TRINITY_DN324_c0_g2_i4	212.37	14	0.048368	-0.586847	Downregulated	SA-E vs SA
TRINITY_DN324_c0_g2_i8	305	14	0.000681585	-0.872638	Downregulated	SA-E vs SA
TRINITY_DN324_c0_g4_i1	486	32	0.00570918	-0.587795	Downregulated	SA-E vs SA
TRINITY_DN324_c1_g1_i1	15	18	1.61919e-07	1.70401	Upregulated	SA-E vs SA
TRINITY_DN32701_c0_g1_i1	180	38	0.0364278	0.332074	Upregulated	SA-E vs SA
TRINITY_DN32712_c0_g1_i1	33	12	0.0195301	0.76139	Upregulated	SA-E vs SA
TRINITY_DN328_c0_g2_i1	989.6	43	2.2286e-07	-0.91594	Downregulated	SA-E vs SA
TRINITY_DN328_c0_g4_i1	54	24	0.000159196	0.919823	Upregulated	SA-E vs SA
TRINITY_DN3281_c0_g2_i1	961	57	0.000137235	-0.67026	Downregulated	SA-E vs SA
TRINITY_DN3281_c0_g3_i1	29	15	0.000877812	1.03958	Upregulated	SA-E vs SA
TRINITY_DN329_c0_g1_i2	30.18	0.14	0.0267805	-2.68224	Downregulated	SA-E vs SA
TRINITY_DN3298_c0_g1_i2	184.49	70	2.16614e-07	0.794945	Upregulated	SA-E vs SA
TRINITY_DN3315_c0_g2_i1	717	44	0.000667009	-0.643387	Downregulated	SA-E vs SA
TRINITY_DN332_c0_g3_i4	13	10	0.00148807	1.35292	Upregulated	SA-E vs SA
TRINITY_DN33251_c0_g1_i1	58	17	0.0266086	0.591147	Upregulated	SA-E vs SA
TRINITY_DN3333_c0_g1_i1	116	4	0.00971496	-1.09847	Downregulated	SA-E vs SA
TRINITY_DN334_c1_g1_i1	391.17	6	7.86789e-10	-1.73805	Downregulated	SA-E vs SA
TRINITY_DN33580_c0_g1_i2	78.42	20	0.0356793	0.481311	Upregulated	SA-E vs SA
TRINITY_DN3364_c0_g2_i2	2	25	2.79657e-11	3.55417	Upregulated	SA-E vs SA
TRINITY_DN339_c0_g3_i4	316.99	67.51	0.00831834	0.339003	Upregulated	SA-E vs SA
TRINITY_DN340_c0_g1_i1	712.42	12.33	1.01347e-13	-1.64272	Downregulated	SA-E vs SA
TRINITY_DN340_c0_g1_i3	58.58	31.34	2.88668e-06	1.06622	Upregulated	SA-E vs SA
TRINITY_DN340_c1_g1_i2	505.91	21.44	1.0473e-05	-0.935678	Downregulated	SA-E vs SA
TRINITY_DN340_c1_g2_i1	418	79	0.032358	0.244703	Upregulated	SA-E vs SA
TRINITY_DN340_c1_g4_i2	282.83	4.71	2.89578e-07	-1.67313	Downregulated	SA-E vs SA
TRINITY_DN3401_c0_g1_i1	233.88	145.39	7.81339e-18	1.18474	Upregulated	SA-E vs SA
TRINITY_DN3401_c0_g1_i3	142.67	0.01	2.89012e-08	-5.99215	Downregulated	SA-E vs SA
TRINITY_DN3401_c0_g1_i4	47.45	24.63	1.45728e-05	1.04237	Upregulated	SA-E vs SA
TRINITY_DN3401_c0_g1_i5	4366.18	26.19	4.6067e-49	-2.47932	Downregulated	SA-E vs SA
TRINITY_DN3401_c2_g1_i1	34	21	1.98164e-05	1.17965	Upregulated	SA-E vs SA
TRINITY_DN34161_c0_g1_i1	36	22	9.1596e-06	1.17125	Upregulated	SA-E vs SA
TRINITY_DN3421_c0_g2_i5	0.18	31.48	1.49345e-13	5.63725	Upregulated	SA-E vs SA
TRINITY_DN3423_c0_g1_i1	215	9	0.00212081	-0.945399	Downregulated	SA-E vs SA
TRINITY_DN3431_c0_g1_i1	1698	88	7.60659e-07	-0.776803	Downregulated	SA-E vs SA
TRINITY_DN3431_c0_g2_i1	145	35	0.0107801	0.437857	Upregulated	SA-E vs SA
TRINITY_DN3437_c0_g1_i3	812.74	47.96	0.000224887	-0.674303	Downregulated	SA-E vs SA
TRINITY_DN3437_c0_g2_i1	411	14	3.28491e-06	-1.10814	Downregulated	SA-E vs SA
TRINITY_DN344_c0_g1_i3	23	19	3.55231e-06	1.40922	Upregulated	SA-E vs SA
TRINITY_DN350_c0_g2_i1	677	35	5.76956e-05	-0.77874	Downregulated	SA-E vs SA
TRINITY_DN3554_c0_g2_i1	91	4	0.0438256	-0.906833	Downregulated	SA-E vs SA
TRINITY_DN35687_c0_g1_i1	200	6	0.00031911	-1.20842	Downregulated	SA-E vs SA
TRINITY_DN3569_c0_g1_i1	913	43	1.92925e-06	-0.852333	Downregulated	SA-E vs SA
TRINITY_DN35711_c0_g1_i1	37	29	4.07372e-08	1.36772	Upregulated	SA-E vs SA
TRINITY_DN35806_c0_g1_i1	814	64	0.0178062	-0.447738	Downregulated	SA-E vs SA
TRINITY_DN35867_c0_g1_i1	2088	155	0.00166323	-0.493103	Downregulated	SA-E vs SA
TRINITY_DN35917_c0_g1_i1	662	44	0.00267023	-0.580376	Downregulated	SA-E vs SA
TRINITY_DN36_c2_g1_i1	15	8	0.0161862	1.06377	Upregulated	SA-E vs SA
TRINITY_DN360_c0_g2_i1	42	34	2.8254e-09	1.39323	Upregulated	SA-E vs SA
TRINITY_DN36066_c0_g1_i1	2906	1651	5.57906e-24	1.11368	Upregulated	SA-E vs SA
TRINITY_DN36079_c0_g1_i1	141	50	9.52755e-06	0.741544	Upregulated	SA-E vs SA
TRINITY_DN36108_c0_g1_i1	1432	121	0.0235848	-0.390861	Downregulated	SA-E vs SA
TRINITY_DN362_c0_g1_i1	98	2	0.00297647	-1.51259	Downregulated	SA-E vs SA
TRINITY_DN36226_c0_g1_i1	37	30	1.88715e-08	1.39449	Upregulated	SA-E vs SA
TRINITY_DN364_c0_g1_i11	5374.39	1031.28	0.00315337	0.256696	Upregulated	SA-E vs SA
TRINITY_DN364_c0_g1_i5	1343.6	0.01	2.43569e-41	-7.7627	Downregulated	SA-E vs SA
TRINITY_DN364_c0_g1_i9	354.44	22.35	0.00796422	-0.621934	Downregulated	SA-E vs SA
TRINITY_DN3662_c1_g1_i3	512	111	0.00252813	0.353056	Upregulated	SA-E vs SA
TRINITY_DN3662_c2_g1_i1	182	3.58	8.45295e-05	-1.54167	Downregulated	SA-E vs SA
TRINITY_DN3678_c0_g2_i1	6056	305	4.25726e-09	-0.799401	Downregulated	SA-E vs SA
TRINITY_DN368_c0_g1_i2	82.05	0.64	0.0018476	-2.27195	Downregulated	SA-E vs SA
TRINITY_DN36845_c0_g1_i1	2007	153	0.0030046	-0.472119	Downregulated	SA-E vs SA
TRINITY_DN37_c0_g2_i3	14.3	10.18	0.000910749	1.29176	Upregulated	SA-E vs SA
TRINITY_DN370_c0_g1_i2	584.34	161	4.06848e-06	0.542316	Upregulated	SA-E vs SA
TRINITY_DN370_c0_g2_i1	86	3	0.0222191	-1.08935	Downregulated	SA-E vs SA
TRINITY_DN370_c0_g3_i1	84	2	0.0114183	-1.39089	Downregulated	SA-E vs SA
TRINITY_DN37177_c0_g1_i1	181	6	0.00108016	-1.12961	Downregulated	SA-E vs SA
TRINITY_DN37196_c0_g1_i1	9	13	4.812e-06	1.85039	Upregulated	SA-E vs SA
TRINITY_DN373_c0_g4_i1	64.94	1	0.0120982	-1.73496	Downregulated	SA-E vs SA
TRINITY_DN3738_c0_g1_i1	111	4	0.0107729	-1.06369	Downregulated	SA-E vs SA
TRINITY_DN374_c0_g1_i1	110.86	29.19	0.00883442	0.506501	Upregulated	SA-E vs SA
TRINITY_DN374_c0_g2_i1	225	48	0.0179884	0.340341	Upregulated	SA-E vs SA
TRINITY_DN376_c0_g1_i2	212.29	7.43	0.000438362	-1.08673	Downregulated	SA-E vs SA
TRINITY_DN376_c0_g1_i4	298.67	68.57	0.00267063	0.398304	Upregulated	SA-E vs SA
TRINITY_DN3777_c0_g1_i1	277	65	0.00253521	0.415558	Upregulated	SA-E vs SA
TRINITY_DN379_c0_g1_i3	214.01	10	0.00393896	-0.858572	Downregulated	SA-E vs SA
TRINITY_DN37914_c0_g1_i1	21	8	0.0452806	0.798118	Upregulated	SA-E vs SA
TRINITY_DN38_c0_g1_i1	30	59	2.72011e-22	2.09405	Upregulated	SA-E vs SA
TRINITY_DN3812_c0_g1_i1	33	20	4.27605e-05	1.1647	Upregulated	SA-E vs SA
TRINITY_DN3816_c0_g1_i1	102	27	0.00952847	0.51069	Upregulated	SA-E vs SA
TRINITY_DN382_c0_g2_i9	177	3	2.75569e-05	-1.65922	Downregulated	SA-E vs SA
TRINITY_DN383_c0_g2_i3	142.47	34.99	0.00847783	0.451529	Upregulated	SA-E vs SA
TRINITY_DN384_c0_g2_i1	18	19	3.36881e-07	1.60275	Upregulated	SA-E vs SA
TRINITY_DN386_c0_g1_i6	92.77	1.31	0.000878105	-1.80335	Downregulated	SA-E vs SA
TRINITY_DN38607_c0_g1_i1	18	9	0.0101133	1.01281	Upregulated	SA-E vs SA
TRINITY_DN3871_c0_g2_i1	1209.09	105.85	0.0469687	-0.362883	Downregulated	SA-E vs SA
TRINITY_DN3871_c0_g2_i4	3986.84	676.37	0.0374538	0.159451	Upregulated	SA-E vs SA
TRINITY_DN3875_c0_g1_i4	3646.01	203.25	4.2181e-07	-0.719233	Downregulated	SA-E vs SA
TRINITY_DN388_c1_g2_i1	10	13	4.812e-06	1.76721	Upregulated	SA-E vs SA
TRINITY_DN3882_c0_g2_i1	4532.7	218.27	1.79546e-09	-0.834809	Downregulated	SA-E vs SA
TRINITY_DN3882_c0_g2_i3	395.3	124.73	3.01536e-07	0.649363	Upregulated	SA-E vs SA
TRINITY_DN3885_c0_g1_i1	1733	119	0.000463228	-0.554645	Downregulated	SA-E vs SA
TRINITY_DN3885_c0_g2_i1	238	7	7.08083e-05	-1.22406	Downregulated	SA-E vs SA
TRINITY_DN38893_c0_g1_i1	37	36	8.0531e-11	1.53843	Upregulated	SA-E vs SA
TRINITY_DN3890_c1_g1_i1	124	4	0.00441553	-1.15113	Downregulated	SA-E vs SA
TRINITY_DN3890_c1_g1_i5	8488.48	585.53	7.09676e-05	-0.551063	Downregulated	SA-E vs SA
TRINITY_DN3890_c1_g1_i6	53.64	26.47	2.32146e-05	1.00244	Upregulated	SA-E vs SA
TRINITY_DN3891_c0_g1_i1	91	3	0.0197076	-1.13396	Downregulated	SA-E vs SA
TRINITY_DN391_c2_g1_i1	148	40	0.00232438	0.527114	Upregulated	SA-E vs SA
TRINITY_DN392_c0_g1_i1	268	14	0.00390201	-0.770534	Downregulated	SA-E vs SA
TRINITY_DN39285_c0_g1_i1	60	1	0.0246357	-1.67249	Downregulated	SA-E vs SA
TRINITY_DN39578_c0_g1_i1	24	13	0.00190528	1.07601	Upregulated	SA-E vs SA
TRINITY_DN3977_c0_g1_i1	136	5	0.00564883	-1.04788	Downregulated	SA-E vs SA
TRINITY_DN399_c0_g1_i1	1506	118	0.00692736	-0.450462	Downregulated	SA-E vs SA
TRINITY_DN3991_c0_g1_i11	283.81	13.19	0.00111857	-0.862842	Downregulated	SA-E vs SA
TRINITY_DN39913_c0_g1_i1	12	6	0.0419754	1.01281	Upregulated	SA-E vs SA
TRINITY_DN400_c1_g1_i1	71	2	0.0324684	-1.25814	Downregulated	SA-E vs SA
TRINITY_DN4011_c0_g1_i1	318	21	0.0189102	-0.585471	Downregulated	SA-E vs SA
TRINITY_DN402_c0_g1_i4	81531	20535	8.81391e-07	0.471438	Upregulated	SA-E vs SA
TRINITY_DN402_c3_g1_i1	1196	83	0.00120244	-0.546286	Downregulated	SA-E vs SA
TRINITY_DN40462_c0_g1_i1	18	10	0.00662995	1.096	Upregulated	SA-E vs SA
TRINITY_DN40591_c0_g1_i1	29	41	5.60708e-15	1.83346	Upregulated	SA-E vs SA
TRINITY_DN406_c0_g1_i3	66	26	0.000267908	0.824585	Upregulated	SA-E vs SA
TRINITY_DN40614_c0_g1_i1	1	20	3.99443e-09	3.92525	Upregulated	SA-E vs SA
TRINITY_DN4072_c0_g2_i1	44	19	0.000820646	0.897068	Upregulated	SA-E vs SA
TRINITY_DN40727_c0_g1_i1	1131	330	6.98344e-08	0.587566	Upregulated	SA-E vs SA
TRINITY_DN4086_c0_g1_i1	92	2	0.00440277	-1.46271	Downregulated	SA-E vs SA
TRINITY_DN4086_c0_g2_i2	174	6	0.00145512	-1.09847	Downregulated	SA-E vs SA
TRINITY_DN4087_c0_g1_i1	1304.06	300.19	0.000102039	0.400405	Upregulated	SA-E vs SA
TRINITY_DN4087_c0_g2_i1	12392.7	558.28	1.08922e-11	-0.88744	Downregulated	SA-E vs SA
TRINITY_DN409_c0_g2_i1	395.01	81	0.0103028	0.309106	Upregulated	SA-E vs SA
TRINITY_DN40951_c0_g1_i1	6	16	3.94049e-08	2.33445	Upregulated	SA-E vs SA
TRINITY_DN40970_c0_g1_i1	59	22	0.00119594	0.781211	Upregulated	SA-E vs SA
TRINITY_DN41_c0_g1_i1	302	67	0.00516736	0.371262	Upregulated	SA-E vs SA
TRINITY_DN41_c0_g2_i1	134.89	194.61	2.09279e-37	1.84945	Upregulated	SA-E vs SA
TRINITY_DN41_c0_g2_i6	2784.21	493.62	0.0188356	0.194238	Upregulated	SA-E vs SA
TRINITY_DN41_c0_g4_i1	15.42	19	5.82615e-08	1.7249	Upregulated	SA-E vs SA
TRINITY_DN4105_c0_g1_i2	252	66	0.00046271	0.502291	Upregulated	SA-E vs SA
TRINITY_DN41052_c0_g1_i1	19	11	0.00281319	1.12856	Upregulated	SA-E vs SA
TRINITY_DN411_c1_g4_i1	18	14	0.000103608	1.36165	Upregulated	SA-E vs SA
TRINITY_DN41218_c0_g1_i1	116	5	0.0210435	-0.922297	Downregulated	SA-E vs SA
TRINITY_DN41481_c0_g1_i1	301	18	0.00917158	-0.663798	Downregulated	SA-E vs SA
TRINITY_DN41597_c0_g1_i1	30	10	0.0425388	0.692693	Upregulated	SA-E vs SA
TRINITY_DN41701_c0_g1_i1	54	15	0.0340935	0.548746	Upregulated	SA-E vs SA
TRINITY_DN41793_c0_g1_i1	2075	476	5.85544e-05	0.397661	Upregulated	SA-E vs SA
TRINITY_DN418_c0_g2_i1	147	36	0.00996168	0.449283	Upregulated	SA-E vs SA
TRINITY_DN4180_c0_g3_i1	83	33	4.91047e-05	0.831868	Upregulated	SA-E vs SA
TRINITY_DN4195_c0_g1_i1	134	29	0.047591	0.351675	Upregulated	SA-E vs SA
TRINITY_DN4195_c0_g2_i1	32	14	0.00266073	0.907389	Upregulated	SA-E vs SA
TRINITY_DN420_c0_g2_i4	1094.47	75.8	0.00151133	-0.547888	Downregulated	SA-E vs SA
TRINITY_DN4205_c0_g2_i1	441	20	8.1078e-05	-0.882158	Downregulated	SA-E vs SA
TRINITY_DN4217_c0_g1_i1	3173	694	0.000153894	0.36003	Upregulated	SA-E vs SA
TRINITY_DN4227_c0_g1_i4	3232	275	0.0142234	-0.385372	Downregulated	SA-E vs SA
TRINITY_DN4227_c1_g1_i1	132	7	0.0475429	-0.758661	Downregulated	SA-E vs SA
TRINITY_DN42290_c0_g1_i1	62	1	0.0173117	-1.69838	Downregulated	SA-E vs SA
TRINITY_DN423_c0_g1_i2	543.1	108	0.00994875	0.284867	Upregulated	SA-E vs SA
TRINITY_DN424_c0_g1_i1	2843.71	512.8	0.0138034	0.207639	Upregulated	SA-E vs SA
TRINITY_DN424_c0_g1_i3	1780.44	76.21	2.69799e-09	-0.927801	Downregulated	SA-E vs SA
TRINITY_DN424_c0_g2_i1	720	51	0.00545043	-0.530123	Downregulated	SA-E vs SA
TRINITY_DN4244_c0_g1_i1	456	96	0.00489702	0.329884	Upregulated	SA-E vs SA
TRINITY_DN425_c0_g1_i3	565.03	158.18	2.91802e-06	0.554896	Upregulated	SA-E vs SA
TRINITY_DN425_c0_g1_i5	829.49	26.82	2.50983e-09	-1.14929	Downregulated	SA-E vs SA
TRINITY_DN425_c0_g2_i1	260	17	0.0260671	-0.593318	Downregulated	SA-E vs SA
TRINITY_DN4254_c0_g2_i1	47	16	0.0112329	0.709315	Upregulated	SA-E vs SA
TRINITY_DN4260_c0_g1_i1	313	3	5.40176e-10	-2.10929	Downregulated	SA-E vs SA
TRINITY_DN4273_c0_g1_i1	8164.35	689.71	0.00855472	-0.391038	Downregulated	SA-E vs SA
TRINITY_DN428_c0_g1_i1	553	27	6.2224e-05	-0.823899	Downregulated	SA-E vs SA
TRINITY_DN42875_c0_g1_i1	7	14	2.27396e-07	2.10732	Upregulated	SA-E vs SA
TRINITY_DN429_c1_g1_i1	152	32	0.049029	0.329884	Upregulated	SA-E vs SA
TRINITY_DN4327_c0_g2_i1	57	26	8.63371e-05	0.940331	Upregulated	SA-E vs SA
TRINITY_DN4327_c0_g4_i1	4152	233	3.8832e-07	-0.713987	Downregulated	SA-E vs SA
TRINITY_DN435_c0_g1_i1	31	16	0.000883481	1.03788	Upregulated	SA-E vs SA
TRINITY_DN4351_c0_g1_i1	6035	452	0.00070877	-0.486086	Downregulated	SA-E vs SA
TRINITY_DN436_c0_g1_i2	119.18	3	0.00299889	-1.34696	Downregulated	SA-E vs SA
TRINITY_DN4370_c0_g1_i1	1490	113	0.00398973	-0.476213	Downregulated	SA-E vs SA
TRINITY_DN43731_c0_g1_i1	13	9	0.0024261	1.26974	Upregulated	SA-E vs SA
TRINITY_DN43788_c0_g1_i1	52	33	1.43189e-07	1.20104	Upregulated	SA-E vs SA
TRINITY_DN439_c0_g2_i7	588.02	126.77	0.0018895	0.348641	Upregulated	SA-E vs SA
TRINITY_DN439_c0_g3_i1	437	10	1.4456e-08	-1.42222	Downregulated	SA-E vs SA
TRINITY_DN445_c2_g1_i1	138	2	8.41695e-05	-1.78283	Downregulated	SA-E vs SA
TRINITY_DN44745_c0_g1_i1	58	21	0.00210254	0.757979	Upregulated	SA-E vs SA
TRINITY_DN4496_c0_g1_i1	190	12	0.0466774	-0.620674	Downregulated	SA-E vs SA
TRINITY_DN4497_c0_g2_i3	1697.96	355	0.0008473	0.32442	Upregulated	SA-E vs SA
TRINITY_DN45_c0_g1_i19	1319.87	52.17	2.6071e-09	-0.990692	Downregulated	SA-E vs SA
TRINITY_DN45_c0_g1_i5	6	20.76	4.26767e-10	2.54007	Upregulated	SA-E vs SA
TRINITY_DN4504_c0_g1_i1	2899	197	0.000151492	-0.562881	Downregulated	SA-E vs SA
TRINITY_DN4504_c0_g2_i2	324	19.75	0.00909081	-0.64868	Downregulated	SA-E vs SA
TRINITY_DN4517_c0_g1_i1	1363	120	0.0442733	-0.358423	Downregulated	SA-E vs SA
TRINITY_DN4517_c0_g2_i1	12207	3187	3.03931e-07	0.4998	Upregulated	SA-E vs SA
TRINITY_DN452_c0_g2_i1	507	40.83	0.048364	-0.428803	Downregulated	SA-E vs SA
TRINITY_DN45310_c0_g1_i1	530	114	0.0025751	0.346831	Upregulated	SA-E vs SA
TRINITY_DN45396_c0_g1_i1	125	5	0.0148663	-0.981293	Downregulated	SA-E vs SA
TRINITY_DN45402_c0_g1_i1	12	14	1.03095e-05	1.68177	Upregulated	SA-E vs SA
TRINITY_DN45535_c0_g1_i1	11	44	1.57453e-19	2.65457	Upregulated	SA-E vs SA
TRINITY_DN45544_c0_g1_i1	104.97	1	0.000142624	-2.11409	Downregulated	SA-E vs SA
TRINITY_DN4555_c0_g1_i1	15	10	0.00268218	1.23994	Upregulated	SA-E vs SA
TRINITY_DN4557_c0_g1_i1	35	22	9.1596e-06	1.19349	Upregulated	SA-E vs SA
TRINITY_DN45969_c0_g1_i1	14	7	0.0384743	1.01281	Upregulated	SA-E vs SA
TRINITY_DN46011_c0_g1_i1	2100	155	0.00147395	-0.497628	Downregulated	SA-E vs SA
TRINITY_DN4605_c1_g6_i1	55	18	0.00694453	0.678206	Upregulated	SA-E vs SA
TRINITY_DN4605_c2_g1_i1	100	28	0.00464257	0.555037	Upregulated	SA-E vs SA
TRINITY_DN46060_c0_g1_i2	164.17	34	0.0456147	0.316938	Upregulated	SA-E vs SA
TRINITY_DN46069_c0_g1_i1	30	10	0.0425388	0.692693	Upregulated	SA-E vs SA
TRINITY_DN46087_c0_g1_i1	2.05	17	3.94049e-08	3.23019	Upregulated	SA-E vs SA
TRINITY_DN461_c0_g1_i6	1196.03	100.86	0.0287819	-0.392434	Downregulated	SA-E vs SA
TRINITY_DN461_c0_g1_i7	156.19	40.98	0.00240773	0.5037	Upregulated	SA-E vs SA
TRINITY_DN46137_c0_g1_i1	14	7	0.0384743	1.01281	Upregulated	SA-E vs SA
TRINITY_DN46144_c0_g1_i1	126	4	0.00337687	-1.16376	Downregulated	SA-E vs SA
TRINITY_DN46297_c0_g1_i1	303.01	14.43	0.000803507	-0.843586	Downregulated	SA-E vs SA
TRINITY_DN46297_c0_g1_i2	31.99	20.57	7.6953e-06	1.21142	Upregulated	SA-E vs SA
TRINITY_DN46315_c0_g1_i1	21	13	0.000488104	1.18143	Upregulated	SA-E vs SA
TRINITY_DN46403_c0_g1_i1	92	3	0.0197076	-1.14259	Downregulated	SA-E vs SA
TRINITY_DN4656_c0_g2_i1	90	1	0.00125538	-1.99261	Downregulated	SA-E vs SA
TRINITY_DN46597_c0_g1_i1	175	4	0.000112166	-1.42312	Downregulated	SA-E vs SA
TRINITY_DN46636_c0_g1_i1	34	15	0.00254585	0.913996	Upregulated	SA-E vs SA
TRINITY_DN46746_c0_g1_i1	139	8	0.045909	-0.694032	Downregulated	SA-E vs SA
TRINITY_DN47_c0_g1_i1	199	756	8.70603e-79	2.61386	Upregulated	SA-E vs SA
TRINITY_DN4703_c0_g2_i1	39	12	0.0383018	0.629497	Upregulated	SA-E vs SA
TRINITY_DN4703_c0_g2_i2	89	2	0.00607118	-1.43654	Downregulated	SA-E vs SA
TRINITY_DN4703_c0_g4_i2	37.6	14.07	0.0114183	0.784003	Upregulated	SA-E vs SA
TRINITY_DN4703_c0_g5_i2	227	47	0.0263484	0.316732	Upregulated	SA-E vs SA
TRINITY_DN4705_c0_g1_i1	1434	107	0.00324478	-0.489043	Downregulated	SA-E vs SA
TRINITY_DN4705_c0_g2_i1	945	80	0.0370583	-0.389378	Downregulated	SA-E vs SA
TRINITY_DN4706_c0_g1_i3	417.6	8	2.53679e-09	-1.56254	Downregulated	SA-E vs SA
TRINITY_DN47100_c0_g1_i1	47	31	1.33666e-07	1.2315	Upregulated	SA-E vs SA
TRINITY_DN4716_c1_g3_i1	19	9	0.0101133	0.970127	Upregulated	SA-E vs SA
TRINITY_DN4717_c0_g1_i1	95	4	0.0340935	-0.940796	Downregulated	SA-E vs SA
TRINITY_DN472_c1_g2_i1	63	51	1.13528e-12	1.39323	Upregulated	SA-E vs SA
TRINITY_DN4724_c0_g1_i1	336	73	0.00571913	0.354748	Upregulated	SA-E vs SA
TRINITY_DN473_c0_g1_i1	395	6	6.29387e-10	-1.74574	Downregulated	SA-E vs SA
TRINITY_DN4746_c0_g2_i1	110	4	0.0107729	-1.05654	Downregulated	SA-E vs SA
TRINITY_DN4768_c0_g1_i1	16	11	0.00106861	1.26424	Upregulated	SA-E vs SA
TRINITY_DN477_c0_g1_i1	3639.53	625.76	0.0301003	0.170008	Upregulated	SA-E vs SA
TRINITY_DN477_c0_g1_i5	12818	299.27	1.6107e-26	-1.40635	Downregulated	SA-E vs SA
TRINITY_DN477_c0_g2_i1	395	16	4.36021e-05	-0.971362	Downregulated	SA-E vs SA
TRINITY_DN48_c0_g4_i1	2	23	1.42164e-10	3.48834	Upregulated	SA-E vs SA
TRINITY_DN4801_c0_g1_i1	198	42	0.0263265	0.335842	Upregulated	SA-E vs SA
TRINITY_DN48066_c0_g1_i1	12	8	0.00639309	1.23994	Upregulated	SA-E vs SA
TRINITY_DN482_c0_g1_i2	28.37	56	2.82239e-22	2.09695	Upregulated	SA-E vs SA
TRINITY_DN4868_c0_g2_i1	163	35	0.034997	0.345471	Upregulated	SA-E vs SA
TRINITY_DN487_c0_g1_i1	30	13	0.00546398	0.899834	Upregulated	SA-E vs SA
TRINITY_DN487_c0_g3_i1	346	70	0.0161057	0.298462	Upregulated	SA-E vs SA
TRINITY_DN4871_c0_g2_i1	82	30	0.000228795	0.766189	Upregulated	SA-E vs SA
TRINITY_DN4874_c0_g1_i1	70	1	0.00582377	-1.79419	Downregulated	SA-E vs SA
TRINITY_DN4874_c1_g1_i1	40	13	0.0211185	0.672704	Upregulated	SA-E vs SA
TRINITY_DN4874_c2_g1_i1	10328.6	899.13	0.0142408	-0.367337	Downregulated	SA-E vs SA
TRINITY_DN4874_c2_g1_i7	3807.43	837.87	0.000115679	0.364858	Upregulated	SA-E vs SA
TRINITY_DN4887_c0_g1_i1	105	3	0.00764597	-1.24694	Downregulated	SA-E vs SA
TRINITY_DN4891_c0_g1_i1	60	25	0.000210713	0.868868	Upregulated	SA-E vs SA
TRINITY_DN4902_c0_g1_i1	16	11	0.00106861	1.26424	Upregulated	SA-E vs SA
TRINITY_DN494_c0_g3_i1	775	394	1.77604e-18	1.02595	Upregulated	SA-E vs SA
TRINITY_DN50_c0_g1_i2	3414.6	2682.59	7.77744e-34	1.36957	Upregulated	SA-E vs SA
TRINITY_DN50_c0_g1_i5	2442.88	1115.72	6.88425e-18	0.941339	Upregulated	SA-E vs SA
TRINITY_DN50_c0_g1_i6	102.88	28.82	0.00427738	0.55541	Upregulated	SA-E vs SA
TRINITY_DN50024_c0_g1_i1	347	23	0.0143021	-0.582551	Downregulated	SA-E vs SA
TRINITY_DN50061_c0_g1_i1	130	4	0.00405285	-1.18843	Downregulated	SA-E vs SA
TRINITY_DN50100_c0_g1_i1	79	63	3.53324e-14	1.38139	Upregulated	SA-E vs SA
TRINITY_DN50113_c0_g1_i2	81	22	0.01531	0.531004	Upregulated	SA-E vs SA
TRINITY_DN50264_c0_g1_i1	15	25	2.41281e-10	1.96337	Upregulated	SA-E vs SA
TRINITY_DN5029_c0_g2_i1	983.17	15.49	3.0007e-17	-1.7169	Downregulated	SA-E vs SA
TRINITY_DN5029_c0_g2_i2	569.83	181.51	3.47493e-08	0.656837	Upregulated	SA-E vs SA
TRINITY_DN50383_c0_g1_i1	482	21	2.79378e-05	-0.913825	Downregulated	SA-E vs SA
TRINITY_DN50535_c0_g1_i1	13	9	0.0024261	1.26974	Upregulated	SA-E vs SA
TRINITY_DN50544_c0_g1_i1	117	5	0.0210435	-0.929074	Downregulated	SA-E vs SA
TRINITY_DN50784_c0_g1_i1	147	6	0.00690226	-0.965342	Downregulated	SA-E vs SA
TRINITY_DN50962_c0_g1_i1	322	5	1.34108e-08	-1.72836	Downregulated	SA-E vs SA
TRINITY_DN50997_c0_g1_i1	227	14	0.0248254	-0.639445	Downregulated	SA-E vs SA
TRINITY_DN510_c0_g3_i3	107	32	0.0014179	0.607045	Upregulated	SA-E vs SA
TRINITY_DN51023_c0_g1_i1	24	17	4.17025e-05	1.28781	Upregulated	SA-E vs SA
TRINITY_DN51165_c0_g1_i1	23	19	3.55231e-06	1.40922	Upregulated	SA-E vs SA
TRINITY_DN51294_c0_g1_i1	56	17	0.0181302	0.618852	Upregulated	SA-E vs SA
TRINITY_DN5132_c0_g1_i1	130	36	0.00219389	0.546313	Upregulated	SA-E vs SA
TRINITY_DN515_c0_g2_i2	352.72	101	1.24561e-05	0.572732	Upregulated	SA-E vs SA
TRINITY_DN5153_c0_g1_i1	353	210	3.21911e-19	1.15002	Upregulated	SA-E vs SA
TRINITY_DN5153_c0_g2_i1	276	192	1.04895e-21	1.27355	Upregulated	SA-E vs SA
TRINITY_DN51592_c0_g1_i1	143	4	0.00170861	-1.26368	Downregulated	SA-E vs SA
TRINITY_DN516_c0_g1_i1	24	14	0.000538084	1.13452	Upregulated	SA-E vs SA
TRINITY_DN5163_c0_g1_i1	402	21	0.000802067	-0.770534	Downregulated	SA-E vs SA
TRINITY_DN5184_c0_g1_i1	359	14	4.31553e-05	-1.00134	Downregulated	SA-E vs SA
TRINITY_DN519_c0_g2_i1	421	24	0.00171733	-0.701569	Downregulated	SA-E vs SA
TRINITY_DN51938_c0_g1_i1	3	13	1.3552e-06	2.71776	Upregulated	SA-E vs SA
TRINITY_DN5194_c0_g1_i1	119	49	1.01983e-06	0.859525	Upregulated	SA-E vs SA
TRINITY_DN5194_c1_g1_i1	86	32	0.000104315	0.77954	Upregulated	SA-E vs SA
TRINITY_DN51975_c0_g1_i1	214	47	0.0146628	0.363293	Upregulated	SA-E vs SA
TRINITY_DN52_c0_g2_i11	15832	5	7.58853e-117	-4.80372	Downregulated	SA-E vs SA
TRINITY_DN52_c0_g2_i12	238762	10958.3	5.25089e-12	-0.872733	Downregulated	SA-E vs SA
TRINITY_DN52_c0_g2_i5	743	5	4.78491e-20	-2.38851	Downregulated	SA-E vs SA
TRINITY_DN52_c0_g2_i7	3.55059e+06	657916	0.00516367	0.229104	Upregulated	SA-E vs SA
TRINITY_DN5212_c0_g2_i1	209	10	0.00425433	-0.839869	Downregulated	SA-E vs SA
TRINITY_DN5212_c1_g1_i1	131	3	0.000704966	-1.42161	Downregulated	SA-E vs SA
TRINITY_DN523_c0_g1_i4	224.7	127.19	2.33765e-15	1.11076	Upregulated	SA-E vs SA
TRINITY_DN52310_c0_g1_i1	9	14	1.5797e-06	1.9089	Upregulated	SA-E vs SA
TRINITY_DN524_c0_g2_i7	44.1	16.05	0.00557603	0.762061	Upregulated	SA-E vs SA
TRINITY_DN52407_c0_g1_i1	131	2	0.000218654	-1.74174	Downregulated	SA-E vs SA
TRINITY_DN526_c0_g5_i1	39	12	0.0383018	0.629497	Upregulated	SA-E vs SA
TRINITY_DN5269_c1_g1_i1	1254.85	62.83	1.33068e-06	-0.804017	Downregulated	SA-E vs SA
TRINITY_DN5269_c1_g1_i3	109.15	3.17	0.00432459	-1.23403	Downregulated	SA-E vs SA
TRINITY_DN5270_c0_g1_i1	24	42	4.58638e-17	2.00189	Upregulated	SA-E vs SA
TRINITY_DN5271_c0_g1_i2	750	61	0.0297971	-0.420991	Downregulated	SA-E vs SA
TRINITY_DN5271_c0_g3_i1	253	8	8.21804e-05	-1.16689	Downregulated	SA-E vs SA
TRINITY_DN5271_c0_g5_i1	179	39	0.0235904	0.35698	Upregulated	SA-E vs SA
TRINITY_DN5274_c0_g1_i1	149	38	0.00448859	0.481301	Upregulated	SA-E vs SA
TRINITY_DN528_c0_g2_i2	1989.28	572.44	3.43201e-08	0.576627	Upregulated	SA-E vs SA
TRINITY_DN528_c0_g4_i1	226	10	0.00184883	-0.90161	Downregulated	SA-E vs SA
TRINITY_DN52804_c0_g1_i1	61	17	0.0300003	0.551331	Upregulated	SA-E vs SA
TRINITY_DN52934_c0_g1_i1	19	14	0.000200837	1.31896	Upregulated	SA-E vs SA
TRINITY_DN5295_c0_g1_i1	149	37	0.00619674	0.460246	Upregulated	SA-E vs SA
TRINITY_DN53_c0_g1_i1	448.43	24.87	0.000923073	-0.72329	Downregulated	SA-E vs SA
TRINITY_DN53_c0_g1_i2	1687.57	150.13	0.0422728	-0.350206	Downregulated	SA-E vs SA
TRINITY_DN53_c0_g3_i1	18.38	9.11	0.0101133	1.00591	Upregulated	SA-E vs SA
TRINITY_DN5311_c0_g1_i1	303	20	0.020641	-0.585843	Downregulated	SA-E vs SA
TRINITY_DN53312_c0_g1_i1	100	2	0.00297647	-1.52854	Downregulated	SA-E vs SA
TRINITY_DN5386_c0_g1_i1	146	4	0.00131234	-1.28007	Downregulated	SA-E vs SA
TRINITY_DN53896_c0_g1_i1	14	9	0.00664724	1.21123	Upregulated	SA-E vs SA
TRINITY_DN54_c0_g1_i1	122	3	0.00225486	-1.36542	Downregulated	SA-E vs SA
TRINITY_DN54_c0_g2_i1	1353.24	54.33	3.09968e-09	-0.978375	Downregulated	SA-E vs SA
TRINITY_DN5440_c0_g1_i1	126	37	0.00111193	0.59262	Upregulated	SA-E vs SA
TRINITY_DN5440_c0_g2_i1	193.38	10.13	0.0097493	-0.768344	Downregulated	SA-E vs SA
TRINITY_DN5440_c0_g2_i7	1788.17	135.18	0.00277338	-0.478737	Downregulated	SA-E vs SA
TRINITY_DN5445_c0_g1_i1	135	39	0.00111828	0.579712	Upregulated	SA-E vs SA
TRINITY_DN5445_c0_g2_i1	458	106	0.000814679	0.404662	Upregulated	SA-E vs SA
TRINITY_DN545_c2_g1_i1	1410.19	95.29	0.000503288	-0.567332	Downregulated	SA-E vs SA
TRINITY_DN545_c2_g1_i4	663.81	147.71	0.000715218	0.373623	Upregulated	SA-E vs SA
TRINITY_DN5454_c2_g1_i1	92	3	0.0197076	-1.14259	Downregulated	SA-E vs SA
TRINITY_DN5487_c0_g2_i2	1276.9	245	0.00685556	0.256626	Upregulated	SA-E vs SA
TRINITY_DN5487_c1_g1_i2	150.06	45.16	0.000352837	0.611995	Upregulated	SA-E vs SA
TRINITY_DN5517_c0_g1_i1	19	34	8.00461e-14	2.0195	Upregulated	SA-E vs SA
TRINITY_DN5521_c0_g2_i1	53	1	0.0276789	-1.57455	Downregulated	SA-E vs SA
TRINITY_DN553_c0_g1_i2	1106	93	0.0294333	-0.394705	Downregulated	SA-E vs SA
TRINITY_DN5559_c0_g1_i1	129	7	0.0437476	-0.740511	Downregulated	SA-E vs SA
TRINITY_DN558_c0_g3_i1	6809	502	0.000450146	-0.498522	Downregulated	SA-E vs SA
TRINITY_DN559_c1_g1_i1	181	3	1.54697e-05	-1.67686	Downregulated	SA-E vs SA
TRINITY_DN560_c0_g1_i3	299.81	18.18	0.00917158	-0.652815	Downregulated	SA-E vs SA
TRINITY_DN5661_c0_g1_i1	144	47	7.68284e-05	0.67607	Upregulated	SA-E vs SA
TRINITY_DN5686_c0_g1_i1	16	15	1.05674e-05	1.50911	Upregulated	SA-E vs SA
TRINITY_DN569_c0_g1_i1	187	38	0.0450954	0.301952	Upregulated	SA-E vs SA
TRINITY_DN5703_c0_g1_i1	23	17	1.36697e-05	1.32141	Upregulated	SA-E vs SA
TRINITY_DN5705_c0_g1_i1	362	24	0.0132736	-0.582361	Downregulated	SA-E vs SA
TRINITY_DN5725_c0_g1_i1	568	104	0.0364204	0.219678	Upregulated	SA-E vs SA
TRINITY_DN5729_c0_g4_i1	34	13	0.0100683	0.801015	Upregulated	SA-E vs SA
TRINITY_DN5733_c0_g1_i2	104	25	0.0269419	0.434597	Upregulated	SA-E vs SA
TRINITY_DN5733_c0_g1_i3	99.17	3	0.00843262	-1.20184	Downregulated	SA-E vs SA
TRINITY_DN576_c1_g1_i3	489.69	112	0.000867751	0.395312	Upregulated	SA-E vs SA
TRINITY_DN5777_c0_g1_i1	3663.2	671	0.00936224	0.22	Upregulated	SA-E vs SA
TRINITY_DN5777_c1_g1_i2	66.77	32	4.55398e-06	0.979362	Upregulated	SA-E vs SA
TRINITY_DN578_c0_g1_i1	190	77	1.75199e-08	0.846959	Upregulated	SA-E vs SA
TRINITY_DN579_c0_g2_i1	76	22	0.00758323	0.581308	Upregulated	SA-E vs SA
TRINITY_DN58_c0_g1_i9	30	82	2.92336e-32	2.35394	Upregulated	SA-E vs SA
TRINITY_DN582_c0_g1_i1	95	39	8.63091e-06	0.857147	Upregulated	SA-E vs SA
TRINITY_DN584_c0_g1_i1	1071.27	82.69	0.00896665	-0.462284	Downregulated	SA-E vs SA
TRINITY_DN584_c0_g1_i4	1216.83	258.31	0.000858102	0.336437	Upregulated	SA-E vs SA
TRINITY_DN584_c0_g2_i1	72	23	0.00404431	0.659091	Upregulated	SA-E vs SA
TRINITY_DN5848_c0_g1_i1	75	80	4.83634e-20	1.61102	Upregulated	SA-E vs SA
TRINITY_DN586_c0_g2_i1	284.83	187	1.70783e-20	1.22785	Upregulated	SA-E vs SA
TRINITY_DN586_c0_g3_i1	409	29	0.0183927	-0.529328	Downregulated	SA-E vs SA
TRINITY_DN586_c0_g3_i2	38	16	0.00242152	0.877136	Upregulated	SA-E vs SA
TRINITY_DN586_c0_g5_i1	176	43	0.00560394	0.447412	Upregulated	SA-E vs SA
TRINITY_DN587_c0_g3_i1	403	30	0.0320894	-0.490894	Downregulated	SA-E vs SA
TRINITY_DN59_c0_g1_i10	43896.9	14459.2	1.73884e-11	0.683295	Upregulated	SA-E vs SA
TRINITY_DN59_c0_g1_i2	735.12	57.55	0.0209215	-0.451135	Downregulated	SA-E vs SA
TRINITY_DN59_c0_g1_i7	37060.7	3392.68	0.0314184	-0.327619	Downregulated	SA-E vs SA
TRINITY_DN590_c0_g1_i3	1744.77	157	0.0483219	-0.341196	Downregulated	SA-E vs SA
TRINITY_DN5910_c0_g1_i2	40	19	0.000302407	0.972317	Upregulated	SA-E vs SA
TRINITY_DN5910_c1_g1_i2	12.26	9	0.00394482	1.31601	Upregulated	SA-E vs SA
TRINITY_DN5918_c0_g1_i2	29.23	25	4.31634e-08	1.43665	Upregulated	SA-E vs SA
TRINITY_DN5918_c0_g4_i1	31	14	0.00266073	0.932455	Upregulated	SA-E vs SA
TRINITY_DN5927_c0_g1_i1	25	9	0.048953	0.753455	Upregulated	SA-E vs SA
TRINITY_DN595_c0_g1_i1	214.22	43	0.04308	0.292256	Upregulated	SA-E vs SA
TRINITY_DN597_c1_g1_i1	1464.77	80.15	4.84461e-06	-0.733919	Downregulated	SA-E vs SA
TRINITY_DN597_c1_g1_i4	19.69	22.54	3.64988e-08	1.66679	Upregulated	SA-E vs SA
TRINITY_DN597_c1_g2_i1	160	7	0.00918629	-0.910542	Downregulated	SA-E vs SA
TRINITY_DN6_c0_g1_i1	14950.2	636.14	6.34325e-13	-0.932492	Downregulated	SA-E vs SA
TRINITY_DN6_c0_g1_i15	53.53	37.06	6.97918e-09	1.26976	Upregulated	SA-E vs SA
TRINITY_DN6_c0_g1_i5	7420.88	448.9	1.57777e-06	-0.65473	Downregulated	SA-E vs SA
TRINITY_DN6_c0_g1_i8	9939.98	614.56	2.42602e-06	-0.637488	Downregulated	SA-E vs SA
TRINITY_DN6_c0_g2_i2	131695	3538.69	6.04528e-25	-1.29541	Downregulated	SA-E vs SA
TRINITY_DN60_c0_g1_i11	1482	10	1.0568e-29	-2.38639	Downregulated	SA-E vs SA
TRINITY_DN60_c0_g1_i17	14	104	2.379e-39	3.14331	Upregulated	SA-E vs SA
TRINITY_DN60_c1_g2_i10	123	1	3.54976e-05	-2.23924	Downregulated	SA-E vs SA
TRINITY_DN602_c0_g1_i1	565	38	0.00459419	-0.571031	Downregulated	SA-E vs SA
TRINITY_DN602_c0_g3_i1	474.05	27	0.00101394	-0.702277	Downregulated	SA-E vs SA
TRINITY_DN606_c0_g1_i1	420	98	0.00087474	0.411091	Upregulated	SA-E vs SA
TRINITY_DN61_c0_g6_i1	33	25	4.67112e-07	1.34087	Upregulated	SA-E vs SA
TRINITY_DN6117_c0_g1_i1	110.47	3	0.00432459	-1.28704	Downregulated	SA-E vs SA
TRINITY_DN6117_c0_g1_i2	8611.83	4478	4.97158e-22	1.04375	Upregulated	SA-E vs SA
TRINITY_DN612_c0_g3_i1	180	6	0.000715667	-1.12524	Downregulated	SA-E vs SA
TRINITY_DN6144_c0_g1_i1	262	18	0.0393792	-0.55424	Downregulated	SA-E vs SA
TRINITY_DN6144_c0_g3_i1	228	2	5.08875e-08	-2.17925	Downregulated	SA-E vs SA
TRINITY_DN616_c0_g2_i1	3357.86	221.4	5.43989e-05	-0.586702	Downregulated	SA-E vs SA
TRINITY_DN616_c0_g2_i2	12778.9	456.66	1.92055e-16	-1.0703	Downregulated	SA-E vs SA
TRINITY_DN616_c0_g3_i1	2653.22	215.95	0.00745102	-0.420425	Downregulated	SA-E vs SA
TRINITY_DN6171_c0_g2_i1	23.07	14	0.000538084	1.16572	Upregulated	SA-E vs SA
TRINITY_DN6199_c0_g2_i1	45	1	0.0452806	-1.44536	Downregulated	SA-E vs SA
TRINITY_DN62_c0_g1_i10	1719	8	2.15006e-35	-2.67969	Downregulated	SA-E vs SA
TRINITY_DN62_c0_g1_i9	96	33	0.00030576	0.716987	Upregulated	SA-E vs SA
TRINITY_DN621_c0_g1_i2	125	57	4.1944e-08	0.940088	Upregulated	SA-E vs SA
TRINITY_DN622_c0_g1_i1	188	125	8.96036e-18	1.23784	Upregulated	SA-E vs SA
TRINITY_DN630_c0_g1_i4	1493.97	30.77	1.20124e-17	-1.50536	Downregulated	SA-E vs SA
TRINITY_DN630_c0_g1_i7	15913.6	854.71	1.14854e-08	-0.748616	Downregulated	SA-E vs SA
TRINITY_DN631_c0_g2_i1	3.11	17.29	3.94049e-08	2.91449	Upregulated	SA-E vs SA
TRINITY_DN631_c0_g2_i2	3313.89	231.71	0.000248639	-0.54036	Downregulated	SA-E vs SA
TRINITY_DN631_c0_g3_i1	366	70	0.035968	0.254095	Upregulated	SA-E vs SA
TRINITY_DN6321_c0_g1_i1	457	16	2.46017e-06	-1.08647	Downregulated	SA-E vs SA
TRINITY_DN635_c0_g1_i1	115	36	0.000638974	0.64311	Upregulated	SA-E vs SA
TRINITY_DN637_c0_g1_i1	1945	156	0.00738776	-0.432014	Downregulated	SA-E vs SA
TRINITY_DN64_c0_g1_i1	617	49	0.0306661	-0.43982	Downregulated	SA-E vs SA
TRINITY_DN64_c0_g3_i1	256	102	2.74855e-09	0.833548	Upregulated	SA-E vs SA
TRINITY_DN640_c0_g1_i1	875.74	9.95	1.46712e-18	-1.975	Downregulated	SA-E vs SA
TRINITY_DN640_c0_g1_i2	401.26	136.05	2.98336e-08	0.706134	Upregulated	SA-E vs SA
TRINITY_DN640_c1_g2_i1	90	38	6.42825e-06	0.879326	Upregulated	SA-E vs SA
TRINITY_DN6406_c0_g1_i1	161	41	0.00340853	0.480139	Upregulated	SA-E vs SA
TRINITY_DN6407_c0_g1_i2	1013.22	46.45	4.8568e-07	-0.873631	Downregulated	SA-E vs SA
TRINITY_DN6407_c0_g1_i5	596.27	160.41	9.03812e-06	0.523461	Upregulated	SA-E vs SA
TRINITY_DN6407_c0_g1_i6	1086.23	58.26	1.02445e-05	-0.749709	Downregulated	SA-E vs SA
TRINITY_DN6407_c0_g1_i9	789.21	66.43	0.0390843	-0.393898	Downregulated	SA-E vs SA
TRINITY_DN6407_c1_g1_i1	714	138	0.0109006	0.262392	Upregulated	SA-E vs SA
TRINITY_DN641_c0_g1_i1	993	81	0.0219302	-0.418687	Downregulated	SA-E vs SA
TRINITY_DN641_c1_g1_i1	914	76.58	0.0374175	-0.397538	Downregulated	SA-E vs SA
TRINITY_DN641_c1_g1_i4	84	27.42	0.00183787	0.676166	Upregulated	SA-E vs SA
TRINITY_DN641_c1_g2_i2	2959	142	7.72537e-09	-0.837525	Downregulated	SA-E vs SA
TRINITY_DN6411_c0_g1_i1	225	12	0.00913803	-0.754163	Downregulated	SA-E vs SA
TRINITY_DN642_c0_g1_i1	1165	88	0.00574483	-0.479368	Downregulated	SA-E vs SA
TRINITY_DN642_c0_g1_i2	87.72	60.73	1.20439e-12	1.26975	Upregulated	SA-E vs SA
TRINITY_DN6423_c0_g1_i1	897	73	0.0242833	-0.420515	Downregulated	SA-E vs SA
TRINITY_DN643_c0_g1_i2	2907.93	178.64	1.21088e-05	-0.642549	Downregulated	SA-E vs SA
TRINITY_DN643_c0_g1_i4	12.59	12.15	0.000206996	1.53198	Upregulated	SA-E vs SA
TRINITY_DN643_c0_g1_i6	2170.73	149.34	0.000301945	-0.553151	Downregulated	SA-E vs SA
TRINITY_DN6448_c0_g1_i5	4019.92	257.94	2.07515e-05	-0.608178	Downregulated	SA-E vs SA
TRINITY_DN647_c0_g1_i1	371	28	0.0418354	-0.480045	Downregulated	SA-E vs SA
TRINITY_DN647_c1_g1_i1	56	1	0.0191693	-1.61802	Downregulated	SA-E vs SA
TRINITY_DN65_c0_g1_i4	8	15	9.08175e-07	2.05636	Upregulated	SA-E vs SA
TRINITY_DN651_c0_g1_i1	274.65	84	6.42051e-06	0.62474	Upregulated	SA-E vs SA
TRINITY_DN651_c1_g1_i2	702	58.39	0.0391379	-0.403297	Downregulated	SA-E vs SA
TRINITY_DN651_c2_g1_i1	305	82	0.000114352	0.522962	Upregulated	SA-E vs SA
TRINITY_DN6520_c0_g1_i1	20	12	0.00117769	1.15676	Upregulated	SA-E vs SA
TRINITY_DN656_c2_g1_i1	81	3	0.0387935	-1.04205	Downregulated	SA-E vs SA
TRINITY_DN657_c2_g1_i1	3	14	7.44748e-07	2.77627	Upregulated	SA-E vs SA
TRINITY_DN658_c0_g2_i1	12	10	0.00148807	1.41612	Upregulated	SA-E vs SA
TRINITY_DN66_c2_g1_i2	92.67	24.11	0.0154761	0.497045	Upregulated	SA-E vs SA
TRINITY_DN6628_c0_g1_i1	66	1	0.00841274	-1.74774	Downregulated	SA-E vs SA
TRINITY_DN667_c0_g1_i1	210	49	0.00619781	0.411091	Upregulated	SA-E vs SA
TRINITY_DN6688_c0_g1_i4	176.95	10	0.0221058	-0.70844	Downregulated	SA-E vs SA
TRINITY_DN6689_c0_g1_i4	7432	571	0.00114814	-0.465963	Downregulated	SA-E vs SA
TRINITY_DN6691_c0_g1_i1	278	14	0.00265213	-0.799457	Downregulated	SA-E vs SA
TRINITY_DN673_c0_g1_i3	43.87	126.59	1.22071e-42	2.39674	Upregulated	SA-E vs SA
TRINITY_DN673_c0_g3_i1	234	301	2.36348e-39	1.75886	Upregulated	SA-E vs SA
TRINITY_DN678_c0_g1_i3	1717.35	97.53	7.66443e-06	-0.704568	Downregulated	SA-E vs SA
TRINITY_DN678_c0_g1_i6	22.45	50.71	1.67404e-21	2.20339	Upregulated	SA-E vs SA
TRINITY_DN679_c0_g2_i10	1054.26	188.24	0.0299632	0.199825	Upregulated	SA-E vs SA
TRINITY_DN679_c0_g2_i6	582.51	160.76	4.06848e-06	0.543615	Upregulated	SA-E vs SA
TRINITY_DN68_c0_g1_i30	457.88	85.5	0.0325723	0.235184	Upregulated	SA-E vs SA
TRINITY_DN68_c0_g1_i4	403.75	81.52	0.0127397	0.29688	Upregulated	SA-E vs SA
TRINITY_DN68_c0_g1_i9	519.68	4.26	5.22872e-15	-2.23273	Downregulated	SA-E vs SA
TRINITY_DN6816_c0_g1_i1	211	14	0.048368	-0.581738	Downregulated	SA-E vs SA
TRINITY_DN6854_c1_g1_i1	65	23	0.00139798	0.739842	Upregulated	SA-E vs SA
TRINITY_DN6859_c0_g1_i1	423	121	5.24557e-06	0.57192	Upregulated	SA-E vs SA
TRINITY_DN687_c0_g1_i1	11	43	3.83289e-19	2.63642	Upregulated	SA-E vs SA
TRINITY_DN687_c0_g1_i3	37	53	7.3841e-18	1.8438	Upregulated	SA-E vs SA
TRINITY_DN688_c0_g1_i1	740	131	0.0455474	0.193054	Upregulated	SA-E vs SA
TRINITY_DN692_c0_g2_i1	160	41	0.0039843	0.485058	Upregulated	SA-E vs SA
TRINITY_DN692_c0_g3_i1	173	8	0.00855414	-0.866792	Downregulated	SA-E vs SA
TRINITY_DN6944_c0_g1_i2	4500.17	254.81	4.55529e-07	-0.706917	Downregulated	SA-E vs SA
TRINITY_DN6944_c0_g1_i6	3736.83	712.19	0.00412437	0.251324	Upregulated	SA-E vs SA
TRINITY_DN699_c0_g1_i1	7	13	7.44748e-07	2.04881	Upregulated	SA-E vs SA
TRINITY_DN6994_c1_g2_i1	242	7	4.50872e-05	-1.23722	Downregulated	SA-E vs SA
TRINITY_DN7_c0_g2_i1	22	12	0.00188767	1.08151	Upregulated	SA-E vs SA
TRINITY_DN702_c0_g1_i2	163.6	37.62	0.0152783	0.399563	Upregulated	SA-E vs SA
TRINITY_DN705_c0_g1_i1	241	66	0.000220628	0.537529	Upregulated	SA-E vs SA
TRINITY_DN7067_c0_g1_i1	130	38	0.00104733	0.589	Upregulated	SA-E vs SA
TRINITY_DN707_c0_g1_i2	54	26	2.32146e-05	0.983018	Upregulated	SA-E vs SA
TRINITY_DN710_c0_g4_i1	904	75	0.0293565	-0.405312	Downregulated	SA-E vs SA
TRINITY_DN710_c1_g1_i2	1659	402	1.58614e-05	0.440911	Upregulated	SA-E vs SA
TRINITY_DN710_c2_g1_i1	831	168	0.0040866	0.297891	Upregulated	SA-E vs SA
TRINITY_DN711_c0_g1_i10	791	65	0.0321443	-0.412868	Downregulated	SA-E vs SA
TRINITY_DN711_c0_g1_i6	627.14	39	0.00129935	-0.632904	Downregulated	SA-E vs SA
TRINITY_DN711_c0_g1_i8	416.95	155.96	4.92281e-10	0.783681	Upregulated	SA-E vs SA
TRINITY_DN712_c1_g1_i10	6865.5	1320.86	0.00278449	0.258763	Upregulated	SA-E vs SA
TRINITY_DN712_c1_g1_i11	331.95	12.94	9.27462e-05	-1.00165	Downregulated	SA-E vs SA
TRINITY_DN7122_c0_g1_i1	7	39	2.32721e-17	2.91618	Upregulated	SA-E vs SA
TRINITY_DN7129_c0_g1_i1	114	28	0.0182823	0.451588	Upregulated	SA-E vs SA
TRINITY_DN7131_c1_g1_i1	72	1	0.00401524	-1.81644	Downregulated	SA-E vs SA
TRINITY_DN7137_c0_g1_i1	98	4	0.0384848	-0.965342	Downregulated	SA-E vs SA
TRINITY_DN714_c0_g1_i1	50	1	0.0397031	-1.52854	Downregulated	SA-E vs SA
TRINITY_DN7156_c0_g2_i4	294.44	3.73	1.73267e-08	-1.88907	Downregulated	SA-E vs SA
TRINITY_DN7156_c0_g4_i1	167	1	1.07845e-06	-2.48068	Downregulated	SA-E vs SA
TRINITY_DN7156_c1_g1_i1	116	26	0.0456023	0.379348	Upregulated	SA-E vs SA
TRINITY_DN716_c0_g1_i1	13	34	3.96752e-16	2.31912	Upregulated	SA-E vs SA
TRINITY_DN7164_c0_g2_i2	12622	1115	0.0181341	-0.355767	Downregulated	SA-E vs SA
TRINITY_DN7164_c1_g3_i5	219.15	53.8	0.00211395	0.451202	Upregulated	SA-E vs SA
TRINITY_DN717_c0_g1_i3	11	13	2.95077e-05	1.69196	Upregulated	SA-E vs SA
TRINITY_DN7183_c1_g1_i1	192	4	2.87988e-05	-1.49631	Downregulated	SA-E vs SA
TRINITY_DN719_c0_g1_i3	531.5	116	0.00185168	0.358331	Upregulated	SA-E vs SA
TRINITY_DN72_c0_g2_i2	24	31	2.70542e-11	1.76213	Upregulated	SA-E vs SA
TRINITY_DN7208_c0_g4_i1	81436	5677	5.07062e-05	-0.542731	Downregulated	SA-E vs SA
TRINITY_DN723_c0_g1_i1	7	27	1.17118e-12	2.62586	Upregulated	SA-E vs SA
TRINITY_DN726_c0_g2_i1	123	32	0.00631105	0.497021	Upregulated	SA-E vs SA
TRINITY_DN7260_c0_g1_i1	13	13	7.67958e-05	1.56007	Upregulated	SA-E vs SA
TRINITY_DN735_c0_g1_i1	173	50	0.000261672	0.580063	Upregulated	SA-E vs SA
TRINITY_DN735_c0_g2_i1	667.17	127	0.0161691	0.250369	Upregulated	SA-E vs SA
TRINITY_DN735_c0_g5_i1	787	184	0.000166575	0.412666	Upregulated	SA-E vs SA
TRINITY_DN736_c1_g1_i1	80	1	0.00266073	-1.89962	Downregulated	SA-E vs SA
TRINITY_DN739_c0_g2_i11	57.91	35.39	1.47168e-07	1.17126	Upregulated	SA-E vs SA
TRINITY_DN739_c0_g2_i12	830.1	151.61	0.0239777	0.217701	Upregulated	SA-E vs SA
TRINITY_DN739_c0_g2_i7	1730.61	74.28	3.70276e-09	-0.925641	Downregulated	SA-E vs SA
TRINITY_DN741_c1_g1_i1	209	6	0.000157241	-1.24317	Downregulated	SA-E vs SA
TRINITY_DN744_c0_g4_i1	344742	62318	0.00873465	0.20956	Upregulated	SA-E vs SA
TRINITY_DN744_c0_g5_i1	283	15	0.00372519	-0.75906	Downregulated	SA-E vs SA
TRINITY_DN746_c0_g1_i2	109	198	2.18401e-42	2.03134	Upregulated	SA-E vs SA
TRINITY_DN7480_c0_g1_i1	12496	4623	8.38671e-14	0.774998	Upregulated	SA-E vs SA
TRINITY_DN753_c0_g2_i5	2919.24	189.78	5.20882e-05	-0.597854	Downregulated	SA-E vs SA
TRINITY_DN7531_c0_g2_i4	641.76	18.16	2.23019e-09	-1.25456	Downregulated	SA-E vs SA
TRINITY_DN7531_c0_g2_i5	56.98	73.38	4.22508e-21	1.75978	Upregulated	SA-E vs SA
TRINITY_DN7531_c0_g3_i1	42	16	0.00557603	0.798118	Upregulated	SA-E vs SA
TRINITY_DN754_c0_g1_i1	50403	21507	3.38653e-17	0.887656	Upregulated	SA-E vs SA
TRINITY_DN7575_c0_g1_i2	103	2	0.00157061	-1.55188	Downregulated	SA-E vs SA
TRINITY_DN758_c0_g1_i5	203.33	66.1	1.00717e-05	0.672916	Upregulated	SA-E vs SA
TRINITY_DN758_c0_g1_i6	10902.4	1013.89	0.0450884	-0.315184	Downregulated	SA-E vs SA
TRINITY_DN758_c0_g1_i7	3378.42	116.31	2.04008e-14	-1.09974	Downregulated	SA-E vs SA
TRINITY_DN758_c0_g2_i1	15	12	0.000206996	1.38389	Upregulated	SA-E vs SA
TRINITY_DN76_c0_g1_i11	535.44	156.26	9.61667e-07	0.587722	Upregulated	SA-E vs SA
TRINITY_DN76_c0_g1_i5	913.69	71.4	0.0126998	-0.452567	Downregulated	SA-E vs SA
TRINITY_DN76_c0_g2_i2	320.04	19.67	0.0117152	-0.642176	Downregulated	SA-E vs SA
TRINITY_DN76_c0_g2_i4	475.57	129.33	1.49547e-05	0.531998	Upregulated	SA-E vs SA
TRINITY_DN76_c0_g3_i1	193	11	0.025317	-0.70174	Downregulated	SA-E vs SA
TRINITY_DN760_c0_g1_i3	2872.4	260.71	0.0439359	-0.334377	Downregulated	SA-E vs SA
TRINITY_DN7606_c0_g1_i2	860.92	182.17	0.00151228	0.333897	Upregulated	SA-E vs SA
TRINITY_DN7606_c0_g1_i4	34.2	11.35	0.0439575	0.689222	Upregulated	SA-E vs SA
TRINITY_DN763_c0_g2_i3	187	10	0.0168121	-0.752054	Downregulated	SA-E vs SA
TRINITY_DN763_c0_g3_i1	165	39	0.00992211	0.421279	Upregulated	SA-E vs SA
TRINITY_DN766_c0_g1_i1	1601.69	26.05	2.22677e-21	-1.6918	Downregulated	SA-E vs SA
TRINITY_DN766_c0_g2_i3	161	2	1.29304e-05	-1.90454	Downregulated	SA-E vs SA
TRINITY_DN766_c1_g2_i1	270	19	0.0450954	-0.5353	Downregulated	SA-E vs SA
TRINITY_DN7694_c0_g1_i1	349	12	1.62687e-05	-1.10074	Downregulated	SA-E vs SA
TRINITY_DN784_c0_g1_i1	2940	167	1.36798e-06	-0.704405	Downregulated	SA-E vs SA
TRINITY_DN785_c0_g1_i1	43	215	3.86963e-66	2.83075	Upregulated	SA-E vs SA
TRINITY_DN7853_c0_g2_i1	32	12	0.0195301	0.785684	Upregulated	SA-E vs SA
TRINITY_DN791_c0_g2_i3	652.68	194.79	1.93948e-07	0.605409	Upregulated	SA-E vs SA
TRINITY_DN791_c0_g2_i5	1113.67	72.5	0.000403703	-0.596761	Downregulated	SA-E vs SA
TRINITY_DN791_c1_g1_i1	2.96	19.02	3.99443e-09	3.02881	Upregulated	SA-E vs SA
TRINITY_DN793_c0_g1_i3	100.25	1.7	0.00297647	-1.65883	Downregulated	SA-E vs SA
TRINITY_DN793_c0_g1_i8	77.75	29.3	0.000236571	0.789567	Upregulated	SA-E vs SA
TRINITY_DN797_c0_g1_i1	617.95	24.11	9.46006e-07	-1.00096	Downregulated	SA-E vs SA
TRINITY_DN797_c0_g1_i10	475.75	261	1.14363e-18	1.08606	Upregulated	SA-E vs SA
TRINITY_DN797_c0_g1_i11	2044.77	10.33	5.20483e-38	-2.61489	Downregulated	SA-E vs SA
TRINITY_DN797_c0_g1_i3	4701.23	302.67	1.89864e-05	-0.60553	Downregulated	SA-E vs SA
TRINITY_DN797_c0_g2_i1	80	1	0.00266073	-1.89962	Downregulated	SA-E vs SA
TRINITY_DN799_c0_g1_i1	62	33	8.26652e-07	1.06218	Upregulated	SA-E vs SA
TRINITY_DN8_c0_g1_i1	15633	3582	2.26585e-05	0.396741	Upregulated	SA-E vs SA
TRINITY_DN80_c0_g1_i111	71.75	303	3.68506e-68	2.6974	Upregulated	SA-E vs SA
TRINITY_DN80_c0_g1_i20	37	61	2.69361e-21	1.95479	Upregulated	SA-E vs SA
TRINITY_DN80_c0_g1_i34	18.7	181	9.37462e-59	3.35225	Upregulated	SA-E vs SA
TRINITY_DN80_c0_g1_i48	72	2	0.023845	-1.26918	Downregulated	SA-E vs SA
TRINITY_DN80_c0_g1_i80	1869	70	4.20442e-11	-1.03323	Downregulated	SA-E vs SA
TRINITY_DN8020_c0_g3_i1	462	26	0.000913601	-0.711746	Downregulated	SA-E vs SA
TRINITY_DN804_c0_g1_i1	2	25	2.79657e-11	3.55417	Upregulated	SA-E vs SA
TRINITY_DN8060_c0_g2_i1	18	15	4.04722e-05	1.41612	Upregulated	SA-E vs SA
TRINITY_DN8081_c0_g1_i2	118	5	0.0165779	-0.935793	Downregulated	SA-E vs SA
TRINITY_DN81_c1_g1_i12	442.52	81.42	0.0483723	0.22352	Upregulated	SA-E vs SA
TRINITY_DN81_c1_g1_i7	156.73	5.86	0.00398251	-1.03458	Downregulated	SA-E vs SA
TRINITY_DN81_c2_g3_i1	181	6	0.00108016	-1.12961	Downregulated	SA-E vs SA
TRINITY_DN8148_c0_g3_i1	12183	838.41	5.22584e-05	-0.552915	Downregulated	SA-E vs SA
TRINITY_DN8148_c0_g3_i3	170	2	7.34744e-06	-1.94748	Downregulated	SA-E vs SA
TRINITY_DN8148_c0_g3_i4	43021.3	2800.11	6.62712e-06	-0.596925	Downregulated	SA-E vs SA
TRINITY_DN8148_c0_g4_i1	573.62	124.47	0.00191039	0.35376	Upregulated	SA-E vs SA
TRINITY_DN8148_c0_g5_i1	99	3	0.00843262	-1.20049	Downregulated	SA-E vs SA
TRINITY_DN8148_c0_g7_i1	156	2	2.43484e-05	-1.87963	Downregulated	SA-E vs SA
TRINITY_DN817_c0_g1_i1	94	2	0.00557603	-1.47969	Downregulated	SA-E vs SA
TRINITY_DN817_c0_g2_i2	642.31	153	0.00017066	0.427398	Upregulated	SA-E vs SA
TRINITY_DN82_c0_g1_i1	21	8	0.0452806	0.798118	Upregulated	SA-E vs SA
TRINITY_DN821_c1_g1_i4	198	4	1.67344e-05	-1.52061	Downregulated	SA-E vs SA
TRINITY_DN8231_c0_g4_i1	13	9	0.0024261	1.26974	Upregulated	SA-E vs SA
TRINITY_DN828_c0_g2_i10	369.53	98.45	6.87738e-05	0.515785	Upregulated	SA-E vs SA
TRINITY_DN828_c0_g2_i6	101.32	1.5	0.00216503	-1.76603	Downregulated	SA-E vs SA
TRINITY_DN83_c0_g1_i2	437	31	0.0159736	-0.528955	Downregulated	SA-E vs SA
TRINITY_DN83_c0_g2_i5	10924.1	467.55	1.51754e-12	-0.92788	Downregulated	SA-E vs SA
TRINITY_DN83_c0_g3_i1	4617	357	0.00174245	-0.460913	Downregulated	SA-E vs SA
TRINITY_DN8317_c0_g2_i1	86	21	0.0348294	0.446985	Upregulated	SA-E vs SA
TRINITY_DN832_c0_g1_i1	1253	63	1.33068e-06	-0.800719	Downregulated	SA-E vs SA
TRINITY_DN8358_c1_g2_i1	141	54	1.95028e-06	0.802306	Upregulated	SA-E vs SA
TRINITY_DN838_c0_g1_i1	574	151	1.67244e-05	0.505784	Upregulated	SA-E vs SA
TRINITY_DN840_c0_g1_i3	9808.47	2262.18	2.03883e-05	0.401909	Upregulated	SA-E vs SA
TRINITY_DN840_c0_g1_i6	0.47	322.82	1.75098e-81	6.71729	Upregulated	SA-E vs SA
TRINITY_DN840_c0_g2_i1	657	45	0.00450727	-0.556647	Downregulated	SA-E vs SA
TRINITY_DN844_c0_g1_i10	45	1.33	0.0452806	-1.22021	Downregulated	SA-E vs SA
TRINITY_DN848_c0_g1_i1	5080	316	5.96016e-06	-0.63268	Downregulated	SA-E vs SA
TRINITY_DN8517_c0_g3_i1	4499.39	0.12	3.38198e-77	-6.75509	Downregulated	SA-E vs SA
TRINITY_DN8517_c2_g1_i1	35	13	0.0174197	0.778129	Upregulated	SA-E vs SA
TRINITY_DN8526_c0_g1_i1	177	50	0.000455892	0.562016	Upregulated	SA-E vs SA
TRINITY_DN8526_c1_g1_i2	90	30	0.0006773	0.692692	Upregulated	SA-E vs SA
TRINITY_DN8574_c0_g1_i1	142	4	0.00106592	-1.25814	Downregulated	SA-E vs SA
TRINITY_DN859_c1_g1_i1	365	14	4.22326e-05	-1.01442	Downregulated	SA-E vs SA
TRINITY_DN86_c0_g1_i15	353.21	165.34	1.08104e-13	0.960776	Upregulated	SA-E vs SA
TRINITY_DN86_c0_g1_i23	81.93	46.79	5.57188e-09	1.11778	Upregulated	SA-E vs SA
TRINITY_DN86_c0_g1_i3	2491.16	176.72	0.000518096	-0.528948	Downregulated	SA-E vs SA
TRINITY_DN86_c0_g1_i44	410.74	24.71	0.00398745	-0.659072	Downregulated	SA-E vs SA
TRINITY_DN86_c0_g1_i45	586.45	173.37	4.60343e-07	0.597913	Upregulated	SA-E vs SA
TRINITY_DN86_c0_g2_i1	102.55	5.08	0.0478107	-0.812465	Downregulated	SA-E vs SA
TRINITY_DN86_c0_g2_i4	19987.9	4683.65	1.08523e-05	0.414436	Upregulated	SA-E vs SA
TRINITY_DN862_c0_g1_i1	257	91	1.33472e-07	0.740376	Upregulated	SA-E vs SA
TRINITY_DN865_c0_g1_i4	17.58	84	1.17899e-33	2.79491	Upregulated	SA-E vs SA
TRINITY_DN8676_c0_g1_i2	61	23	0.0011292	0.789987	Upregulated	SA-E vs SA
TRINITY_DN87_c0_g1_i1	1672.5	107.75	0.00014665	-0.604997	Downregulated	SA-E vs SA
TRINITY_DN87_c0_g1_i2	279.98	132.2	8.1434e-13	0.96761	Upregulated	SA-E vs SA
TRINITY_DN87_c0_g1_i3	1494.53	54.05	9.22193e-11	-1.06086	Downregulated	SA-E vs SA
TRINITY_DN871_c0_g1_i2	20	17	6.16451e-06	1.43175	Upregulated	SA-E vs SA
TRINITY_DN873_c0_g1_i1	75	3	0.0444493	-0.981293	Downregulated	SA-E vs SA
TRINITY_DN8763_c0_g2_i1	13	18	2.70647e-07	1.81699	Upregulated	SA-E vs SA
TRINITY_DN877_c1_g1_i1	21926	5866	1.1024e-07	0.519087	Upregulated	SA-E vs SA
TRINITY_DN877_c1_g2_i1	16.5	28.37	2.15568e-11	1.98796	Upregulated	SA-E vs SA
TRINITY_DN877_c1_g2_i4	2615.5	129.21	3.05132e-08	-0.814622	Downregulated	SA-E vs SA
TRINITY_DN8784_c0_g2_i1	143	8	0.0495194	-0.716431	Downregulated	SA-E vs SA
TRINITY_DN8785_c1_g1_i1	540	38	0.00960571	-0.5353	Downregulated	SA-E vs SA
TRINITY_DN8787_c0_g1_i1	40	26	7.67613e-07	1.21996	Upregulated	SA-E vs SA
TRINITY_DN881_c0_g1_i1	211	9	0.00186426	-0.930572	Downregulated	SA-E vs SA
TRINITY_DN8817_c0_g1_i1	88	26	0.00422381	0.597455	Upregulated	SA-E vs SA
TRINITY_DN886_c0_g1_i1	418.1	30.78	0.0270089	-0.499671	Downregulated	SA-E vs SA
TRINITY_DN886_c1_g1_i1	625	166	9.62896e-06	0.513352	Upregulated	SA-E vs SA
TRINITY_DN891_c0_g1_i1	98	28	0.00464257	0.570988	Upregulated	SA-E vs SA
TRINITY_DN896_c1_g1_i3	67.47	20	0.0101916	0.600052	Upregulated	SA-E vs SA
TRINITY_DN9_c0_g1_i12	46457.9	2494	6.34116e-09	-0.749003	Downregulated	SA-E vs SA
TRINITY_DN9_c0_g1_i17	42022.9	1197	5.95476e-23	-1.24935	Downregulated	SA-E vs SA
TRINITY_DN90_c0_g1_i11	1655	414	5.84676e-06	0.466039	Upregulated	SA-E vs SA
TRINITY_DN90_c0_g1_i22	1103.55	65.45	6.63628e-05	-0.670322	Downregulated	SA-E vs SA
TRINITY_DN90_c0_g1_i5	1080.88	1065.07	6.37075e-39	1.54843	Upregulated	SA-E vs SA
TRINITY_DN90_c0_g1_i7	4913.34	199.08	1.92095e-12	-0.971129	Downregulated	SA-E vs SA
TRINITY_DN90_c0_g1_i9	19744.3	3976.07	0.000802565	0.294806	Upregulated	SA-E vs SA
TRINITY_DN9004_c0_g2_i1	1105	382	8.32642e-11	0.721456	Upregulated	SA-E vs SA
TRINITY_DN902_c0_g2_i2	2	20	2.27269e-09	3.378	Upregulated	SA-E vs SA
TRINITY_DN903_c0_g1_i2	134.86	28.74	0.047591	0.339514	Upregulated	SA-E vs SA
TRINITY_DN903_c0_g1_i5	257.4	54.43	0.0174168	0.33338	Upregulated	SA-E vs SA
TRINITY_DN903_c0_g2_i2	192.22	1.13	1.23717e-07	-2.49523	Downregulated	SA-E vs SA
TRINITY_DN903_c0_g5_i1	117	1	7.28479e-05	-2.19975	Downregulated	SA-E vs SA
TRINITY_DN9078_c1_g1_i1	3521	254	0.000470682	-0.515707	Downregulated	SA-E vs SA
TRINITY_DN908_c0_g1_i1	780	53	0.00262333	-0.562948	Downregulated	SA-E vs SA
TRINITY_DN914_c0_g1_i1	670	41	0.000743166	-0.645613	Downregulated	SA-E vs SA
TRINITY_DN9160_c0_g1_i1	90	3	0.0259426	-1.12524	Downregulated	SA-E vs SA
TRINITY_DN917_c0_g1_i1	585	25	5.65923e-06	-0.929074	Downregulated	SA-E vs SA
TRINITY_DN9177_c0_g2_i1	192	51	0.000893726	0.513427	Upregulated	SA-E vs SA
TRINITY_DN9177_c0_g3_i1	1257.18	250.07	0.00341077	0.285086	Upregulated	SA-E vs SA
TRINITY_DN9177_c0_g3_i2	382.82	148.93	1.99998e-10	0.814692	Upregulated	SA-E vs SA
TRINITY_DN918_c0_g2_i2	4186.33	386.21	0.0477053	-0.321511	Downregulated	SA-E vs SA
TRINITY_DN918_c0_g4_i1	353	17	0.000516984	-0.834742	Downregulated	SA-E vs SA
TRINITY_DN919_c0_g3_i1	82.31	74.1	4.22798e-17	1.47711	Upregulated	SA-E vs SA
TRINITY_DN919_c0_g3_i5	3996.1	318.69	0.00375135	-0.436509	Downregulated	SA-E vs SA
TRINITY_DN92_c0_g1_i1	776.86	32.35	4.14354e-07	-0.949531	Downregulated	SA-E vs SA
TRINITY_DN92_c0_g1_i2	1077.08	81.44	0.00568708	-0.478581	Downregulated	SA-E vs SA
TRINITY_DN92_c0_g2_i1	1365.87	85.32	0.000108234	-0.629375	Downregulated	SA-E vs SA
TRINITY_DN92_c0_g2_i2	195.83	45.8	0.00800343	0.412927	Upregulated	SA-E vs SA
TRINITY_DN92_c0_g2_i3	634.36	43.09	0.00413356	-0.563204	Downregulated	SA-E vs SA
TRINITY_DN92_c0_g3_i2	2413.4	165.53	0.00026879	-0.555556	Downregulated	SA-E vs SA
TRINITY_DN9313_c0_g1_i1	21	22	9.19797e-08	1.59679	Upregulated	SA-E vs SA
TRINITY_DN9313_c0_g2_i1	872	68	0.0142567	-0.454216	Downregulated	SA-E vs SA
TRINITY_DN9430_c0_g1_i3	121.48	3	0.00225486	-1.36205	Downregulated	SA-E vs SA
TRINITY_DN945_c0_g1_i1	1835.14	139.29	0.00299728	-0.475561	Downregulated	SA-E vs SA
TRINITY_DN9457_c0_g1_i1	86	27	0.00183787	0.645402	Upregulated	SA-E vs SA
TRINITY_DN946_c0_g2_i5	237.5	91.97	1.44384e-08	0.811047	Upregulated	SA-E vs SA
TRINITY_DN946_c1_g2_i1	33	14	0.00510013	0.883094	Upregulated	SA-E vs SA
TRINITY_DN9470_c0_g1_i1	283	17	0.0113359	-0.660242	Downregulated	SA-E vs SA
TRINITY_DN9492_c0_g2_i2	53.02	17.42	0.0119749	0.681293	Upregulated	SA-E vs SA
TRINITY_DN950_c0_g1_i1	24156	892	3.01262e-16	-1.04441	Downregulated	SA-E vs SA
TRINITY_DN950_c0_g2_i1	774.32	158.31	0.00369243	0.306762	Upregulated	SA-E vs SA
TRINITY_DN950_c0_g2_i2	1942.68	120.69	4.17053e-05	-0.633686	Downregulated	SA-E vs SA
TRINITY_DN950_c1_g1_i1	458	94	0.00776876	0.309806	Upregulated	SA-E vs SA
TRINITY_DN951_c0_g1_i1	521	130	9.5661e-05	0.464046	Upregulated	SA-E vs SA
TRINITY_DN951_c0_g2_i1	131	7	0.0475429	-0.752657	Downregulated	SA-E vs SA
TRINITY_DN951_c1_g1_i1	223	50	0.00952434	0.37962	Upregulated	SA-E vs SA
TRINITY_DN951_c1_g2_i1	616	178	7.79932e-07	0.579909	Upregulated	SA-E vs SA
TRINITY_DN952_c0_g1_i1	74.7	2	0.0174197	-1.29825	Downregulated	SA-E vs SA
TRINITY_DN952_c0_g1_i3	2128.3	189	0.0365619	-0.351618	Downregulated	SA-E vs SA
TRINITY_DN952_c0_g1_i4	20	8	0.0452806	0.836639	Upregulated	SA-E vs SA
TRINITY_DN956_c0_g1_i1	383.6	28.97	0.0420873	-0.479526	Downregulated	SA-E vs SA
TRINITY_DN956_c0_g2_i2	388.69	226.34	4.31439e-19	1.13314	Upregulated	SA-E vs SA
TRINITY_DN956_c0_g2_i3	1568.38	286.69	0.0140248	0.218362	Upregulated	SA-E vs SA
TRINITY_DN9617_c0_g1_i2	27	9	0.048953	0.692693	Upregulated	SA-E vs SA
TRINITY_DN9630_c1_g1_i2	51	1	0.0397031	-1.54418	Downregulated	SA-E vs SA
TRINITY_DN965_c1_g1_i2	5478	437	0.00307175	-0.436278	Downregulated	SA-E vs SA
TRINITY_DN9662_c0_g1_i1	30	12	0.0110484	0.836639	Upregulated	SA-E vs SA
TRINITY_DN968_c0_g1_i2	7489.28	672	0.0263484	-0.343437	Downregulated	SA-E vs SA
TRINITY_DN968_c0_g2_i1	110	5	0.033558	-0.880366	Downregulated	SA-E vs SA
TRINITY_DN968_c0_g3_i1	401	28	0.0161828	-0.541438	Downregulated	SA-E vs SA
TRINITY_DN968_c0_g4_i1	187	6	0.0006773	-1.15536	Downregulated	SA-E vs SA
TRINITY_DN97_c0_g3_i1	14	10	0.000910749	1.29442	Upregulated	SA-E vs SA
TRINITY_DN970_c0_g1_i1	170	76	2.12536e-09	0.924453	Upregulated	SA-E vs SA
TRINITY_DN9711_c0_g1_i1	79	21	0.0235088	0.514014	Upregulated	SA-E vs SA
TRINITY_DN9721_c0_g1_i1	201	50	0.00257805	0.461625	Upregulated	SA-E vs SA
TRINITY_DN9761_c0_g2_i1	507	93	0.0391379	0.221114	Upregulated	SA-E vs SA
TRINITY_DN9761_c0_g2_i3	730	195	4.59187e-06	0.517867	Upregulated	SA-E vs SA
TRINITY_DN979_c0_g1_i1	249.81	263.2	2.33042e-33	1.60129	Upregulated	SA-E vs SA
TRINITY_DN9851_c0_g1_i1	69	30	2.75569e-05	0.90247	Upregulated	SA-E vs SA
TRINITY_DN986_c0_g2_i2	591.19	5.8	4.03001e-15	-2.09088	Downregulated	SA-E vs SA
TRINITY_DN986_c0_g3_i1	290	56	0.0401533	0.261681	Upregulated	SA-E vs SA
TRINITY_DN986_c1_g1_i1	126	34	0.00406743	0.52586	Upregulated	SA-E vs SA
TRINITY_DN990_c0_g1_i1	98	1	0.000426762	-2.05985	Downregulated	SA-E vs SA
TRINITY_DN9943_c0_g1_i1	16	10	0.00268218	1.18899	Upregulated	SA-E vs SA
TRINITY_DN9990_c0_g3_i1	1	13	2.47519e-06	3.58514	Upregulated	SA-E vs SA
TRINITY_DN1347_c1_g1_i1	7	2	0.00106592	0.570988	Upregulated	SA-E vs SA
TRINITY_DN50249_c0_g1_i1	6	4	4.22326e-05	1.23994	Upregulated	SA-E vs SA
TRINITY_DN41995_c0_g1_i1	2	1	1.08104e-13	1.01281	Upregulated	SA-E vs SA
TRINITY_DN28005_c0_g1_i1	1	1	5.57188e-09	1.56007	Upregulated	SA-E vs SA
TRINITY_DN26630_c0_g1_i1	3	5	0.000518096	1.96337	Upregulated	SA-E vs SA
TRINITY_DN88_c0_g7_i1	2	3	0.00398745	1.88019	Upregulated	SA-E vs SA
TRINITY_DN13701_c1_g1_i1	1	1	4.60343e-07	1.56007	Upregulated	SA-E vs SA
TRINITY_DN22298_c0_g1_i1	1	3	0.0478107	2.42744	Upregulated	SA-E vs SA
TRINITY_DN41130_c0_g1_i1	6	12	1.08523e-05	2.10732	Upregulated	SA-E vs SA
TRINITY_DN1033_c0_g2_i2	4	9	1.33472e-07	2.20031	Upregulated	SA-E vs SA
TRINITY_DN13326_c1_g1_i1	1	1	1.17899e-33	1.56007	Upregulated	SA-E vs SA
TRINITY_DN10932_c2_g2_i1	1	6	0.0011292	2.97469	Upregulated	SA-E vs SA
TRINITY_DN9189_c0_g1_i1	1	1	0.00014665	1.56007	Upregulated	SA-E vs SA
TRINITY_DN324_c0_g5_i1	10	1	8.1434e-13	-0.257864	Downregulated	SA-E vs SA
TRINITY_DN173_c0_g2_i1	4	4	9.22193e-11	1.56007	Upregulated	SA-E vs SA
TRINITY_DN29716_c0_g1_i1	8	7	6.16451e-06	1.45464	Upregulated	SA-E vs SA
TRINITY_DN8863_c0_g1_i2	1	1	0.0444493	1.56007	Upregulated	SA-E vs SA
TRINITY_DN35929_c0_g1_i1	2	2	2.70647e-07	1.56007	Upregulated	SA-E vs SA
TRINITY_DN9830_c0_g1_i6	1.49	2	1.1024e-07	1.79248	Upregulated	SA-E vs SA
TRINITY_DN15554_c0_g2_i1	1	1	2.15568e-11	1.56007	Upregulated	SA-E vs SA
TRINITY_DN22867_c0_g1_i9	1	1	3.05132e-08	1.56007	Upregulated	SA-E vs SA
TRINITY_DN44970_c0_g1_i1	1	1	0.0495194	1.56007	Upregulated	SA-E vs SA
TRINITY_DN38984_c0_g1_i1	2	1	0.00960571	1.01281	Upregulated	SA-E vs SA
TRINITY_DN526_c0_g1_i1	4	9	7.67613e-07	2.20031	Upregulated	SA-E vs SA
TRINITY_DN2248_c0_g2_i1	2	1	0.00186426	1.01281	Upregulated	SA-E vs SA
TRINITY_DN39873_c0_g1_i1	1	2	0.00422381	2.10732	Upregulated	SA-E vs SA
TRINITY_DN52977_c0_g1_i1	2	2	0.0270089	1.56007	Upregulated	SA-E vs SA
TRINITY_DN1244_c1_g1_i1	1	1	2.75569e-05	1.56007	Upregulated	SA-E vs SA
TRINITY_DN36290_c0_g1_i1	1	1	4.03001e-15	1.56007	Upregulated	SA-E vs SA
TRINITY_DN5478_c0_g4_i1	2	4	0.0401533	2.10732	Upregulated	SA-E vs SA
TRINITY_DN51273_c0_g1_i1	3	6	0.00406743	2.10732	Upregulated	SA-E vs SA
TRINITY_DN15273_c0_g1_i1	8	3	0.000426762	0.785684	Upregulated	SA-E vs SA
TRINITY_DN21224_c0_g1_i1	1	1	0.00268218	1.56007	Upregulated	SA-E vs SA
TRINITY_DN6627_c0_g1_i1	1	2	2.47519e-06	2.10732	Upregulated	SA-E vs SA
TRINITY_DN1325_c0_g2_i1	9	1	0.00106592	-0.17468	Downregulated	SA-E vs SA
TRINITY_DN38366_c0_g1_i1	10	4	4.23223e-09	0.836639	Upregulated	SA-E vs SA
TRINITY_DN124_c1_g1_i1	3	3	2.26777e-05	1.56007	Upregulated	SA-E vs SA
TRINITY_DN31565_c0_g1_i1	6	5	0.0130129	1.41612	Upregulated	SA-E vs SA
TRINITY_DN8542_c0_g1_i2	8	1	8.05735e-45	-0.0816887	Downregulated	SA-E vs SA
TRINITY_DN19645_c0_g1_i11	3	5	0.00225438	1.96337	Upregulated	SA-E vs SA
TRINITY_DN624_c0_g3_i1	4	2	2.01948e-12	1.01281	Upregulated	SA-E vs SA
TRINITY_DN25587_c1_g1_i1	1	1	0.00339444	1.56007	Upregulated	SA-E vs SA
TRINITY_DN14994_c0_g1_i1	3	1	0.00217941	0.692693	Upregulated	SA-E vs SA
TRINITY_DN42015_c0_g1_i1	2	5	0.0175268	2.28349	Upregulated	SA-E vs SA
TRINITY_DN3933_c0_g1_i1	4	7	0.00191661	2.00189	Upregulated	SA-E vs SA
TRINITY_DN1969_c0_g1_i1	6	12	0.00337854	2.10732	Upregulated	SA-E vs SA
TRINITY_DN610_c0_g3_i1	11	2	0.00764597	0.214138	Upregulated	SA-E vs SA
TRINITY_DN12680_c0_g3_i1	5	1	0.00891795	0.289387	Upregulated	SA-E vs SA
TRINITY_DN43326_c0_g1_i1	2	7	0.00011453	2.54914	Upregulated	SA-E vs SA
TRINITY_DN12154_c0_g1_i1	6	3	0.0187995	1.01281	Upregulated	SA-E vs SA
TRINITY_DN4701_c3_g1_i2	10	4	0.00107021	0.836639	Upregulated	SA-E vs SA
TRINITY_DN47643_c0_g1_i1	1	1	0.0197909	1.56007	Upregulated	SA-E vs SA
TRINITY_DN150_c0_g2_i6	1	1	0.0276789	1.56007	Upregulated	SA-E vs SA
TRINITY_DN41639_c0_g1_i1	1	2	0.000188122	2.10732	Upregulated	SA-E vs SA
TRINITY_DN52099_c0_g1_i1	3	2	0.000193237	1.23994	Upregulated	SA-E vs SA
TRINITY_DN38674_c0_g1_i1	7	3	0.0397031	0.89111	Upregulated	SA-E vs SA
TRINITY_DN17247_c0_g1_i1	1	1	0.0230463	1.56007	Upregulated	SA-E vs SA
TRINITY_DN1304_c0_g1_i1	2	2	0.0032375	1.56007	Upregulated	SA-E vs SA
TRINITY_DN123_c0_g1_i1	1	1	4.12385e-09	1.56007	Upregulated	SA-E vs SA
TRINITY_DN22405_c0_g1_i1	1	1	0.000296643	1.56007	Upregulated	SA-E vs SA
TRINITY_DN5704_c0_g1_i1	6	4	4.812e-06	1.23994	Upregulated	SA-E vs SA
TRINITY_DN42156_c0_g1_i1	8	2	6.38187e-09	0.465563	Upregulated	SA-E vs SA
TRINITY_DN1523_c0_g2_i6	4	5	0.0396078	1.73624	Upregulated	SA-E vs SA
TRINITY_DN5285_c0_g2_i2	4	2	1.96508e-06	1.01281	Upregulated	SA-E vs SA
TRINITY_DN17303_c0_g2_i1	4	4	0.000535268	1.56007	Upregulated	SA-E vs SA
TRINITY_DN9551_c0_g1_i3	9.69	6.61	0.0476948	1.25807	Upregulated	SA-E vs SA
TRINITY_DN53080_c0_g1_i1	2	2	0.0450954	1.56007	Upregulated	SA-E vs SA
TRINITY_DN32735_c0_g1_i1	9	8	0.0341522	1.46707	Upregulated	SA-E vs SA
TRINITY_DN24099_c0_g1_i1	1	1	1.42164e-10	1.56007	Upregulated	SA-E vs SA
TRINITY_DN21992_c0_g1_i1	2	4	6.28799e-06	2.10732	Upregulated	SA-E vs SA
TRINITY_DN29355_c0_g1_i1	11	4	0.0131415	0.76139	Upregulated	SA-E vs SA
TRINITY_DN2746_c0_g3_i2	2.1	4	3.7489e-05	2.0688	Upregulated	SA-E vs SA
TRINITY_DN26054_c0_g1_i1	8	3	0.0116633	0.785684	Upregulated	SA-E vs SA
TRINITY_DN1619_c0_g1_i2	10	1	9.37971e-06	-0.257864	Downregulated	SA-E vs SA
TRINITY_DN3776_c0_g1_i1	7	7	0.00271604	1.56007	Upregulated	SA-E vs SA
TRINITY_DN12180_c0_g1_i1	3	3	0.0228436	1.56007	Upregulated	SA-E vs SA
TRINITY_DN31201_c0_g1_i1	6	4	0.0184168	1.23994	Upregulated	SA-E vs SA
TRINITY_DN15788_c0_g1_i1	1	3	0.0384848	2.42744	Upregulated	SA-E vs SA
TRINITY_DN3113_c1_g1_i1	10	11	0.0452806	1.63532	Upregulated	SA-E vs SA
TRINITY_DN43469_c0_g1_i1	1	1	0.0397031	1.56007	Upregulated	SA-E vs SA
TRINITY_DN1191_c0_g1_i1	9	3	1.52561e-08	0.692693	Upregulated	SA-E vs SA
TRINITY_DN711_c0_g1_i7	8	6.72	3.33429e-12	1.42241	Upregulated	SA-E vs SA
TRINITY_DN5124_c0_g1_i1	10	5	0.0246349	1.01281	Upregulated	SA-E vs SA
TRINITY_DN37430_c0_g1_i1	6	5	0.0188282	1.41612	Upregulated	SA-E vs SA
TRINITY_DN44_c0_g1_i2	0.21	4	0.0183398	3.88673	Upregulated	SA-E vs SA
TRINITY_DN33136_c0_g1_i1	1	2	0.0211185	2.10732	Upregulated	SA-E vs SA
TRINITY_DN13527_c1_g1_i1	7	6	2.21221e-08	1.43836	Upregulated	SA-E vs SA
TRINITY_DN168_c0_g1_i2	8	8	0.0384743	1.56007	Upregulated	SA-E vs SA
TRINITY_DN10_c3_g1_i6	2	4	0.00662995	2.10732	Upregulated	SA-E vs SA
TRINITY_DN12526_c0_g1_i1	7	4	0.00225486	1.11824	Upregulated	SA-E vs SA
TRINITY_DN41107_c0_g1_i1	6	2	1.27137e-22	0.692693	Upregulated	SA-E vs SA
TRINITY_DN45465_c0_g1_i1	5	5	0.0373851	1.56007	Upregulated	SA-E vs SA
TRINITY_DN51406_c0_g1_i1	5	3	9.19915e-10	1.15676	Upregulated	SA-E vs SA
TRINITY_DN1261_c0_g1_i1	5	1	0.000165623	0.289387	Upregulated	SA-E vs SA
TRINITY_DN9986_c0_g1_i1	9	5	0.00297647	1.096	Upregulated	SA-E vs SA
TRINITY_DN45938_c0_g1_i1	6	2	6.16451e-06	0.692693	Upregulated	SA-E vs SA
TRINITY_DN19262_c0_g1_i1	2	3	0.0002523	1.88019	Upregulated	SA-E vs SA
TRINITY_DN7120_c0_g1_i1	2	7	1.68804e-11	2.54914	Upregulated	SA-E vs SA
TRINITY_DN5285_c0_g1_i5	1	4	0.0294287	2.65457	Upregulated	SA-E vs SA
TRINITY_DN45300_c0_g1_i1	1	1	0.0318622	1.56007	Upregulated	SA-E vs SA
TRINITY_DN33867_c0_g1_i1	2	1	0.016576	1.01281	Upregulated	SA-E vs SA
TRINITY_DN5813_c0_g1_i1	10	4	0.0151306	0.836639	Upregulated	SA-E vs SA
TRINITY_DN26715_c0_g1_i1	2	1	0.016576	1.01281	Upregulated	SA-E vs SA
TRINITY_DN20926_c0_g1_i1	11	2	0.0440406	0.214138	Upregulated	SA-E vs SA
TRINITY_DN1523_c0_g1_i4	4	3	0.000505419	1.33294	Upregulated	SA-E vs SA
TRINITY_DN106_c0_g2_i3	7	6.63	0.000588384	1.51719	Upregulated	SA-E vs SA
TRINITY_DN1177_c0_g1_i2	1	2	0.0270464	2.10732	Upregulated	SA-E vs SA
TRINITY_DN4107_c1_g3_i1	10	1	0.000122012	-0.257864	Downregulated	SA-E vs SA
TRINITY_DN27741_c0_g1_i1	4	1	2.06335e-14	0.465563	Upregulated	SA-E vs SA
TRINITY_DN18182_c1_g1_i2	1	2	0.0161862	2.10732	Upregulated	SA-E vs SA
TRINITY_DN42793_c0_g1_i1	4	1	0.000488104	0.465563	Upregulated	SA-E vs SA
TRINITY_DN24030_c0_g1_i1	1	2	0.00257805	2.10732	Upregulated	SA-E vs SA
TRINITY_DN27707_c0_g1_i2	2	7	0.0386722	2.54914	Upregulated	SA-E vs SA
TRINITY_DN14712_c0_g1_i2	1	2	2.65969e-06	2.10732	Upregulated	SA-E vs SA
TRINITY_DN2778_c0_g1_i1	6	0.59	0.0015756	-0.271133	Downregulated	SA-E vs SA
TRINITY_DN31063_c0_g1_i1	1	5	0.00399889	2.83074	Upregulated	SA-E vs SA
TRINITY_DN50086_c0_g1_i1	8	3	0.0105726	0.785684	Upregulated	SA-E vs SA
TRINITY_DN8147_c0_g1_i1	2	1	1.57059e-24	1.01281	Upregulated	SA-E vs SA
TRINITY_DN43044_c0_g1_i1	6	1	0.0063016	0.145441	Upregulated	SA-E vs SA
TRINITY_DN39322_c0_g1_i1	4	1	0.00576685	0.465563	Upregulated	SA-E vs SA
TRINITY_DN31892_c0_g1_i1	9.36	10	0.0182112	1.61228	Upregulated	SA-E vs SA
TRINITY_DN66_c2_g1_i1	4.33	11.89	6.75365e-07	2.35758	Upregulated	SA-E vs SA
TRINITY_DN46371_c0_g1_i1	1	1	2.47519e-06	1.56007	Upregulated	SA-E vs SA
TRINITY_DN34006_c0_g1_i1	10	5	7.44748e-07	1.01281	Upregulated	SA-E vs SA
TRINITY_DN378_c0_g1_i5	2	1	0.0175998	1.01281	Upregulated	SA-E vs SA
TRINITY_DN50799_c0_g1_i1	2	2	0.0336881	1.56007	Upregulated	SA-E vs SA
TRINITY_DN1523_c0_g1_i2	7	4	0.000300221	1.11824	Upregulated	SA-E vs SA
TRINITY_DN373_c0_g6_i1	5	8	1.01947e-08	1.93114	Upregulated	SA-E vs SA
TRINITY_DN421_c0_g1_i1	1	2	3.87543e-21	2.10732	Upregulated	SA-E vs SA
TRINITY_DN14813_c0_g1_i1	9	5	2.71108e-08	1.096	Upregulated	SA-E vs SA
TRINITY_DN54496_c0_g1_i1	3	3	0.00291723	1.56007	Upregulated	SA-E vs SA
TRINITY_DN1198_c0_g2_i1	3	7	1.83234e-08	2.22902	Upregulated	SA-E vs SA
TRINITY_DN3550_c0_g1_i1	7	5	8.47387e-06	1.29442	Upregulated	SA-E vs SA
TRINITY_DN51189_c0_g1_i1	5	2	4.17025e-05	0.836639	Upregulated	SA-E vs SA
TRINITY_DN44_c0_g5_i1	1	5	0.00108855	2.83074	Upregulated	SA-E vs SA
TRINITY_DN28213_c0_g1_i1	9	8	7.15053e-05	1.46707	Upregulated	SA-E vs SA
TRINITY_DN940_c0_g1_i6	11	1	6.94139e-05	-0.333114	Downregulated	SA-E vs SA
TRINITY_DN46551_c0_g1_i1	1	2	0.000679555	2.10732	Upregulated	SA-E vs SA
TRINITY_DN36086_c0_g1_i1	4	10	0.00744989	2.28349	Upregulated	SA-E vs SA
TRINITY_DN33_c1_g1_i1	7	8	0.000540694	1.66549	Upregulated	SA-E vs SA
TRINITY_DN41224_c0_g1_i1	2	2	6.39364e-06	1.56007	Upregulated	SA-E vs SA
TRINITY_DN3225_c1_g1_i1	4	3	0.0357408	1.33294	Upregulated	SA-E vs SA
TRINITY_DN28021_c0_g1_i1	1	2	0.0347118	2.10732	Upregulated	SA-E vs SA
TRINITY_DN5745_c0_g1_i1	1	5	6.54022e-06	2.83074	Upregulated	SA-E vs SA
TRINITY_DN42500_c0_g1_i1	7	6	0.000106783	1.43836	Upregulated	SA-E vs SA
TRINITY_DN3315_c0_g1_i1	10	8	0.0246357	1.38389	Upregulated	SA-E vs SA
TRINITY_DN35901_c0_g1_i1	1	11	0.000255123	3.45325	Upregulated	SA-E vs SA
TRINITY_DN52534_c0_g1_i1	5	4	4.19171e-30	1.38389	Upregulated	SA-E vs SA
TRINITY_DN38020_c0_g1_i1	10	1	7.64505e-05	-0.257864	Downregulated	SA-E vs SA
TRINITY_DN28252_c0_g1_i1	4	1	0.00857343	0.465563	Upregulated	SA-E vs SA
TRINITY_DN6688_c0_g2_i1	10	2	0.000192791	0.289387	Upregulated	SA-E vs SA
TRINITY_DN31219_c0_g1_i1	7	2	2.92866e-06	0.570988	Upregulated	SA-E vs SA
TRINITY_DN32813_c0_g1_i1	5	3	0.0444547	1.15676	Upregulated	SA-E vs SA
TRINITY_DN579_c0_g3_i1	11	8	0.0397031	1.30864	Upregulated	SA-E vs SA
TRINITY_DN22116_c0_g2_i1	5	6	0.00749061	1.70401	Upregulated	SA-E vs SA
TRINITY_DN9830_c2_g1_i1	1	4	0.0273317	2.65457	Upregulated	SA-E vs SA
TRINITY_DN43434_c0_g1_i1	1	1	0.000143701	1.56007	Upregulated	SA-E vs SA
TRINITY_DN9883_c0_g1_i1	11	3	0.00159636	0.53426	Upregulated	SA-E vs SA
TRINITY_DN11832_c0_g2_i4	2.6	0.32	0.00381958	-0.0939281	Downregulated	SA-E vs SA
TRINITY_DN38648_c0_g1_i1	1	1	0.0133442	1.56007	Upregulated	SA-E vs SA
TRINITY_DN12202_c0_g1_i1	5	10	1.14179e-05	2.10732	Upregulated	SA-E vs SA
TRINITY_DN1262_c0_g7_i1	1	4	4.5814e-25	2.65457	Upregulated	SA-E vs SA
TRINITY_DN48194_c0_g1_i1	10	2	1.47521e-82	0.289387	Upregulated	SA-E vs SA
TRINITY_DN16433_c0_g1_i1	6	3	0.00030576	1.01281	Upregulated	SA-E vs SA
TRINITY_DN32188_c0_g1_i1	4	3	1.03151e-10	1.33294	Upregulated	SA-E vs SA
TRINITY_DN244_c0_g1_i1	10.64	3	0.0231566	0.560531	Upregulated	SA-E vs SA
TRINITY_DN6142_c0_g1_i4	1	1	0.00535196	1.56007	Upregulated	SA-E vs SA
TRINITY_DN41617_c0_g1_i1	1	3	0.00943844	2.42744	Upregulated	SA-E vs SA
TRINITY_DN16728_c0_g1_i1	10	3	3.35329e-10	0.609509	Upregulated	SA-E vs SA
TRINITY_DN31049_c0_g1_i1	4	5	0.0269419	1.73624	Upregulated	SA-E vs SA
TRINITY_DN34043_c0_g1_i1	9	3	0.0119081	0.692693	Upregulated	SA-E vs SA
TRINITY_DN3614_c0_g1_i1	1	8	5.69721e-11	3.20182	Upregulated	SA-E vs SA
TRINITY_DN49201_c0_g1_i1	4	8	0.00619366	2.10732	Upregulated	SA-E vs SA
TRINITY_DN983_c0_g1_i1	11	7	9.82733e-05	1.20322	Upregulated	SA-E vs SA
TRINITY_DN12322_c0_g1_i1	2	3	0.000224833	1.88019	Upregulated	SA-E vs SA
TRINITY_DN41867_c0_g1_i1	6	5	0.000283242	1.41612	Upregulated	SA-E vs SA
TRINITY_DN52288_c0_g1_i1	1	2	1.61877e-14	2.10732	Upregulated	SA-E vs SA
TRINITY_DN4383_c0_g1_i1	11	1	0.047285	-0.333114	Downregulated	SA-E vs SA
TRINITY_DN38408_c0_g1_i1	2	3	0.000205848	1.88019	Upregulated	SA-E vs SA
TRINITY_DN52970_c0_g1_i1	11	9	0.00149235	1.40163	Upregulated	SA-E vs SA
TRINITY_DN13664_c0_g1_i2	1	1	3.79475e-05	1.56007	Upregulated	SA-E vs SA
TRINITY_DN31342_c0_g1_i1	2	2	2.81996e-08	1.56007	Upregulated	SA-E vs SA
TRINITY_DN14212_c0_g1_i1	7	2	0.023845	0.570988	Upregulated	SA-E vs SA
TRINITY_DN36562_c0_g1_i1	2	1	0.0231566	1.01281	Upregulated	SA-E vs SA
TRINITY_DN9551_c0_g1_i2	0.01	0.02	0.000206996	2.10728	Upregulated	SA-E vs SA
TRINITY_DN45393_c0_g1_i1	8	11	0.000228795	1.81149	Upregulated	SA-E vs SA
TRINITY_DN32066_c0_g1_i1	2	2	7.44748e-07	1.56007	Upregulated	SA-E vs SA
TRINITY_DN698_c0_g5_i1	6	2	2.09721e-08	0.692693	Upregulated	SA-E vs SA
TRINITY_DN26739_c0_g1_i1	10	3	5.93548e-17	0.609509	Upregulated	SA-E vs SA
TRINITY_DN31101_c0_g1_i1	2	2	0.00988045	1.56007	Upregulated	SA-E vs SA
TRINITY_DN46070_c0_g1_i1	6	7	0.000329839	1.68177	Upregulated	SA-E vs SA
TRINITY_DN6334_c0_g2_i2	1	1	0.000556462	1.56007	Upregulated	SA-E vs SA
TRINITY_DN262_c0_g2_i3	1	2	0.00834208	2.10732	Upregulated	SA-E vs SA
TRINITY_DN16171_c0_g2_i1	1	1	0.00698974	1.56007	Upregulated	SA-E vs SA
TRINITY_DN33165_c0_g1_i2	3	12	1.67695e-09	2.65457	Upregulated	SA-E vs SA
TRINITY_DN4719_c0_g5_i1	7	6	0.00131234	1.43836	Upregulated	SA-E vs SA
TRINITY_DN52278_c0_g1_i1	1	1	0.00119641	1.56007	Upregulated	SA-E vs SA
TRINITY_DN28065_c0_g1_i1	1	2	0.0185387	2.10732	Upregulated	SA-E vs SA
TRINITY_DN29960_c0_g1_i1	3	4	2.5868e-05	1.7872	Upregulated	SA-E vs SA
TRINITY_DN14_c1_g1_i8	1	4	0.0389822	2.65457	Upregulated	SA-E vs SA
TRINITY_DN38531_c0_g1_i1	11	1	0.010723	-0.333114	Downregulated	SA-E vs SA
TRINITY_DN45391_c0_g1_i1	1	2	0.00441553	2.10732	Upregulated	SA-E vs SA
TRINITY_DN262_c0_g5_i1	1	6	6.94139e-05	2.97469	Upregulated	SA-E vs SA
TRINITY_DN38433_c0_g1_i1	5	4	0.000679555	1.38389	Upregulated	SA-E vs SA
TRINITY_DN32960_c0_g1_i1	5	6	0.00744989	1.70401	Upregulated	SA-E vs SA
TRINITY_DN42291_c0_g1_i1	4	1	0.000540694	0.465563	Upregulated	SA-E vs SA
TRINITY_DN5304_c0_g1_i1	9	4	6.39364e-06	0.919823	Upregulated	SA-E vs SA
TRINITY_DN7087_c0_g1_i2	2	2	0.0357408	1.56007	Upregulated	SA-E vs SA
TRINITY_DN17871_c0_g2_i1	1	3	0.0347118	2.42744	Upregulated	SA-E vs SA
TRINITY_DN5469_c0_g1_i12	0.24	1	6.54022e-06	2.6868	Upregulated	SA-E vs SA

## Sheet: Annotated-only
gene_id	SA	SA-E	Pvalue	logFC	category	condition	Uniprot-Id	Protein names	Gene Names	Pathway	Gene Ontology (biological process)	Gene Ontology (cellular component)	Gene Ontology (molecular function)	Gene Names (ORF)	Gene Names (primary)	EC number	Function [CC]	Organism	Entry Name	UniParc	Gene Ontology (GO)	Gene Ontology IDs
TRINITY_DN106_c0_g2_i3	7	6.63	0.000588384	1.51719	Upregulated	SA-E vs SA	AACC3_PSEAI	Aminoglycoside N(3)-acetyltransferase III (EC 2.3.1.81) (AAC(3)-IIIa) (ACC(3)-III) (Aminocyclitol 3-N-acetyltransferase type III) (Aminoglycoside acetyltransferase (3)-IIIa) (Gentamicin-(3)-N-acetyl-transferase)	aacC3		2-deoxystreptamine metabolic process [GO:1901742]; acetyl-CoA catabolic process [GO:0046356]; antibiotic metabolic process [GO:0016999]; cellular response to antibiotic [GO:0071236]		aminoglycoside 3-N-acetyltransferase activity [GO:0046353]; coenzyme A binding [GO:0120225]; identical protein binding [GO:0042802]; protein homodimerization activity [GO:0042803]		aacC3	2.3.1.81	FUNCTION: Resistance to antibiotics containing the 2-deoxy-streptamine ring including dibekacin, gentamicin, kanamycin, sisomicin, tobramycin and neomycin, but not to amikacin or netilmicin (PubMed:1649572). Acetylates a broad range of both 4,5- and 4,6-disubstituted aminoglycosides, including neomycin, paromomycin, ribostamycin, sisomicin, gentamicin, tobramycin and kanamycin, with no preference…	Pseudomonas aeruginosa	AACC3_PSEAI	UPI000012508F	aminoglycoside 3-N-acetyltransferase activity [GO:0046353]; coenzyme A binding [GO:0120225]; identical protein binding [GO:0042802]; protein homodimerization activity [GO:0042803]; 2-deoxystreptamine metabolic process [GO:1901742]; acetyl-CoA catabolic process [GO:0046356]; antibiotic metabolic process [GO:0016999]; cellular response to antibiotic [GO:0071236]	GO:0016999; GO:0042802; GO:0042803; GO:0046353; GO:0046356; GO:0071236; GO:0120225; GO:1901742
TRINITY_DN13829_c1_g3_i2	2202.08	172.83	0.00465448	-0.449137	Downregulated	SA-E vs SA	ACCA_STAAW	Acetyl-coenzyme A carboxylase carboxyl transferase subunit alpha (ACCase subunit alpha) (Acetyl-CoA carboxylase carboxyltransferase subunit alpha) (EC 2.1.3.15)	accA MW1643	PATHWAY: Lipid metabolism; malonyl-CoA biosynthesis; malonyl-CoA from acetyl-CoA: step 1/1. {ECO:0000255|HAMAP-Rule:MF_00823}.	fatty acid biosynthetic process [GO:0006633]; malonyl-CoA biosynthetic process [GO:2001295]	acetyl-CoA carboxylase complex [GO:0009317]	acetyl-CoA carboxylase activity [GO:0003989]; ATP binding [GO:0005524]; carboxyl- or carbamoyltransferase activity [GO:0016743]		accA	2.1.3.15	FUNCTION: Component of the acetyl coenzyme A carboxylase (ACC) complex. First, biotin carboxylase catalyzes the carboxylation of biotin on its carrier protein (BCCP) and then the CO(2) group is transferred by the carboxyltransferase to acetyl-CoA to form malonyl-CoA. {ECO:0000255|HAMAP-Rule:MF_00823}.	Staphylococcus aureus (strain MW2)	ACCA_STAAW	UPI0000054C3A	acetyl-CoA carboxylase complex [GO:0009317]; acetyl-CoA carboxylase activity [GO:0003989]; ATP binding [GO:0005524]; carboxyl- or carbamoyltransferase activity [GO:0016743]; fatty acid biosynthetic process [GO:0006633]; malonyl-CoA biosynthetic process [GO:2001295]	GO:0003989; GO:0005524; GO:0006633; GO:0009317; GO:0016743; GO:2001295
TRINITY_DN4227_c1_g1_i1	132	7	0.0475429	-0.758661	Downregulated	SA-E vs SA	ACCC1_BACSU	Biotin carboxylase 1 (EC 6.3.4.14) (Acetyl-coenzyme A carboxylase biotin carboxylase subunit A 1)	accC1 accC yqhX BSU24340	PATHWAY: Lipid metabolism; malonyl-CoA biosynthesis; malonyl-CoA from acetyl-CoA: step 1/1. {ECO:0000250|UniProtKB:P24182}.	fatty acid biosynthetic process [GO:0006633]; malonyl-CoA biosynthetic process [GO:2001295]		acetyl-CoA carboxylase activity [GO:0003989]; ATP binding [GO:0005524]; biotin carboxylase activity [GO:0004075]; metal ion binding [GO:0046872]		accC1	6.3.4.14	FUNCTION: This protein is a component of the acetyl coenzyme A carboxylase complex; first, biotin carboxylase catalyzes the carboxylation of the carrier protein and then the transcarboxylase transfers the carboxyl group to form malonyl-CoA. {ECO:0000250|UniProtKB:P24182}.	Bacillus subtilis (strain 168)	ACCC1_BACSU	UPI000195C648	acetyl-CoA carboxylase activity [GO:0003989]; ATP binding [GO:0005524]; biotin carboxylase activity [GO:0004075]; metal ion binding [GO:0046872]; fatty acid biosynthetic process [GO:0006633]; malonyl-CoA biosynthetic process [GO:2001295]	GO:0003989; GO:0004075; GO:0005524; GO:0006633; GO:0046872; GO:2001295
TRINITY_DN13829_c1_g3_i8	619.57	212.13	1.53856e-09	0.71384	Upregulated	SA-E vs SA	ACCD_STAAM	Acetyl-coenzyme A carboxylase carboxyl transferase subunit beta (ACCase subunit beta) (Acetyl-CoA carboxylase carboxyltransferase subunit beta) (EC 2.1.3.15)	accD SAV1701	PATHWAY: Lipid metabolism; malonyl-CoA biosynthesis; malonyl-CoA from acetyl-CoA: step 1/1. {ECO:0000255|HAMAP-Rule:MF_01395}.	fatty acid biosynthetic process [GO:0006633]; malonyl-CoA biosynthetic process [GO:2001295]	acetyl-CoA carboxylase complex [GO:0009317]	acetyl-CoA carboxylase activity [GO:0003989]; ATP binding [GO:0005524]; carboxyl- or carbamoyltransferase activity [GO:0016743]; zinc ion binding [GO:0008270]		accD	2.1.3.15	FUNCTION: Component of the acetyl coenzyme A carboxylase (ACC) complex. Biotin carboxylase (BC) catalyzes the carboxylation of biotin on its carrier protein (BCCP) and then the CO(2) group is transferred by the transcarboxylase to acetyl-CoA to form malonyl-CoA. {ECO:0000255|HAMAP-Rule:MF_01395}.	Staphylococcus aureus (strain Mu50 / ATCC 700699)	ACCD_STAAM	UPI0000054C3B	acetyl-CoA carboxylase complex [GO:0009317]; acetyl-CoA carboxylase activity [GO:0003989]; ATP binding [GO:0005524]; carboxyl- or carbamoyltransferase activity [GO:0016743]; zinc ion binding [GO:0008270]; fatty acid biosynthetic process [GO:0006633]; malonyl-CoA biosynthetic process [GO:2001295]	GO:0003989; GO:0005524; GO:0006633; GO:0008270; GO:0009317; GO:0016743; GO:2001295
TRINITY_DN33580_c0_g1_i2	78.42	20	0.0356793	0.481311	Upregulated	SA-E vs SA	ACKA_STAAN	Acetate kinase (EC 2.7.2.1) (Acetokinase)	ackA SA1533	PATHWAY: Metabolic intermediate biosynthesis; acetyl-CoA biosynthesis; acetyl-CoA from acetate: step 1/2. {ECO:0000255|HAMAP-Rule:MF_00020}.	acetate metabolic process [GO:0006083]; acetyl-CoA biosynthetic process [GO:0006085]	cytoplasm [GO:0005737]	acetate kinase activity [GO:0008776]; ATP binding [GO:0005524]; magnesium ion binding [GO:0000287]		ackA	2.7.2.1	FUNCTION: Catalyzes the formation of acetyl phosphate from acetate and ATP. Can also catalyze the reverse reaction. {ECO:0000255|HAMAP-Rule:MF_00020}.	Staphylococcus aureus (strain N315)	ACKA_STAAN	UPI000012529A	cytoplasm [GO:0005737]; acetate kinase activity [GO:0008776]; ATP binding [GO:0005524]; magnesium ion binding [GO:0000287]; acetate metabolic process [GO:0006083]; acetyl-CoA biosynthetic process [GO:0006085]	GO:0000287; GO:0005524; GO:0005737; GO:0006083; GO:0006085; GO:0008776
TRINITY_DN4902_c0_g1_i1	16	11	0.00106861	1.26424	Upregulated	SA-E vs SA	ACNA_MYCS2	Aconitate hydratase A (ACN) (Aconitase) (EC 4.2.1.3) ((2R,3S)-2-methylisocitrate dehydratase) ((2S,3R)-3-hydroxybutane-1,2,3-tricarboxylate dehydratase) (Iron-responsive protein-like) (IRP-like) (Probable 2-methyl-cis-aconitate hydratase) (EC 4.2.1.99) (RNA-binding protein)	acnA acn MSMEG_3143 MSMEI_3062	PATHWAY: Carbohydrate metabolism; tricarboxylic acid cycle; isocitrate from oxaloacetate: step 2/2. {ECO:0000250|UniProtKB:O53166}.; PATHWAY: Organic acid metabolism; propanoate degradation. {ECO:0000250|UniProtKB:O53166}.	tricarboxylic acid cycle [GO:0006099]		2-methylisocitrate dehydratase activity [GO:0047456]; 4 iron, 4 sulfur cluster binding [GO:0051539]; aconitate hydratase activity [GO:0003994]; metal ion binding [GO:0046872]; mRNA 3'-UTR binding [GO:0003730]; mRNA binding [GO:0003729]		acnA	4.2.1.3; 4.2.1.99	FUNCTION: Involved in the catabolism of short chain fatty acids (SCFA) via the tricarboxylic acid (TCA)(acetyl degradation route) and probably via the 2-methylcitrate cycle I (propionate degradation route). Catalyzes the reversible isomerization of citrate to isocitrate via cis-aconitate. The apo form of AcnA functions as a RNA-binding regulatory protein. Could catalyze the hydration of 2-methyl-…	Mycolicibacterium smegmatis (strain ATCC 700084 / mc(2)155) (Mycobacterium smegmatis)	ACNA_MYCS2	UPI0000E8552E	2-methylisocitrate dehydratase activity [GO:0047456]; 4 iron, 4 sulfur cluster binding [GO:0051539]; aconitate hydratase activity [GO:0003994]; metal ion binding [GO:0046872]; mRNA 3'-UTR binding [GO:0003730]; mRNA binding [GO:0003729]; tricarboxylic acid cycle [GO:0006099]	GO:0003729; GO:0003730; GO:0003994; GO:0006099; GO:0046872; GO:0047456; GO:0051539
TRINITY_DN1721_c0_g2_i1	2091	188	0.0442854	-0.341847	Downregulated	SA-E vs SA	ACUA_BACLD	Acetoin utilization protein AcuA (EC 2.3.1.-) (Acetoin dehydrogenase) (Protein acetyltransferase AcuA)	acuA BL00376 BLi03120	PATHWAY: Ketone degradation; acetoin degradation. {ECO:0000250|UniProtKB:P39065}.	acetoin catabolic process [GO:0045150]; butanediol catabolic process [GO:0034078]; cellular response to glucose starvation [GO:0042149]; cellular response to nutrient levels [GO:0031669]		acetoin dehydrogenase (NAD+) activity [GO:0019152]; acetyl-CoA synthetase acetyltransferase activity [GO:0043894]		acuA	2.3.1.-	FUNCTION: Part of the acuABC operon, which is possibly involved in the breakdown of acetoin and butanediol. Acts as an acetyltransferase inactivating acetyl-CoA synthetase AcsA via acetylation at a Lys residue. {ECO:0000250|UniProtKB:P39065, ECO:0000269|PubMed:20524112}.	Bacillus licheniformis (strain ATCC 14580 / DSM 13 / JCM 2505 / CCUG 7422 / NBRC 12200 / NCIMB 9375 / NCTC 10341 / NRRL NRS-1264 / Gibson 46)	ACUA_BACLD	UPI000043D9F2	acetoin dehydrogenase (NAD+) activity [GO:0019152]; acetyl-CoA synthetase acetyltransferase activity [GO:0043894]; acetoin catabolic process [GO:0045150]; butanediol catabolic process [GO:0034078]; cellular response to glucose starvation [GO:0042149]; cellular response to nutrient levels [GO:0031669]	GO:0019152; GO:0031669; GO:0034078; GO:0042149; GO:0043894; GO:0045150
TRINITY_DN3230_c0_g1_i1	775	58	0.00991348	-0.486695	Downregulated	SA-E vs SA	ADDA_STAAS	ATP-dependent helicase/nuclease subunit A (EC 3.1.-.-) (EC 5.6.2.4) (ATP-dependent helicase/nuclease AddA) (DNA 3'-5' helicase AddA)	addA SAS0837		double-strand break repair via homologous recombination [GO:0000724]	cytosol [GO:0005829]; DNA helicase complex [GO:0033202]	3'-5' exonuclease activity [GO:0008408]; ATP binding [GO:0005524]; ATP hydrolysis activity [GO:0016887]; ATP-dependent H2AZ histone chaperone activity [GO:0140849]; ATP-dependent H3-H4 histone complex chaperone activity [GO:0140665]; chromatin extrusion motor activity [GO:0140584]; cohesin loader activity [GO:0061775]; DNA clamp loader activity [GO:0003689]; double-stranded DNA binding [GO:000369…		addA	3.1.-.-; 5.6.2.4	FUNCTION: The heterodimer acts as both an ATP-dependent DNA helicase and an ATP-dependent, dual-direction single-stranded exonuclease. Recognizes the chi site generating a DNA molecule suitable for the initiation of homologous recombination. The AddA nuclease domain is required for chi fragment generation; this subunit has the helicase and 3' -> 5' nuclease activities. {ECO:0000255|HAMAP-Rule:MF_…	Staphylococcus aureus (strain MSSA476)	ADDA_STAAS	UPI00003B1A85	cytosol [GO:0005829]; DNA helicase complex [GO:0033202]; 3'-5' exonuclease activity [GO:0008408]; ATP binding [GO:0005524]; ATP hydrolysis activity [GO:0016887]; ATP-dependent H2AZ histone chaperone activity [GO:0140849]; ATP-dependent H3-H4 histone complex chaperone activity [GO:0140665]; chromatin extrusion motor activity [GO:0140584]; cohesin loader activity [GO:0061775]; DNA clamp loader acti…	GO:0000724; GO:0003689; GO:0003690; GO:0005524; GO:0005829; GO:0008408; GO:0009378; GO:0016853; GO:0016887; GO:0033202; GO:0036121; GO:0061749; GO:0061775; GO:0140584; GO:0140665; GO:0140849; GO:1990518
TRINITY_DN292_c0_g1_i4	29565	5309.89	0.0103566	0.204448	Upregulated	SA-E vs SA	ADH_STAAW	Alcohol dehydrogenase (ADH) (EC 1.1.1.1)	adh MW0568				alcohol dehydrogenase (NAD+) activity [GO:0004022]; zinc ion binding [GO:0008270]		adh	1.1.1.1		Staphylococcus aureus (strain MW2)	ADH_STAAW	UPI00000547EE	alcohol dehydrogenase (NAD+) activity [GO:0004022]; zinc ion binding [GO:0008270]	GO:0004022; GO:0008270
TRINITY_DN17303_c0_g2_i1	4	4	0.000535268	1.56007	Upregulated	SA-E vs SA	AGAP9_HUMAN	Arf-GAP with GTPase, ANK repeat and PH domain-containing protein 9 (AGAP-9) (Centaurin-gamma-like family member 6)	AGAP9 CTGLF6				GTPase activator activity [GO:0005096]; GTPase activity [GO:0003924]; metal ion binding [GO:0046872]		AGAP9		FUNCTION: Putative GTPase-activating protein. {ECO:0000305}.	Homo sapiens (Human)	AGAP9_HUMAN	UPI0000F6E72B	GTPase activator activity [GO:0005096]; GTPase activity [GO:0003924]; metal ion binding [GO:0046872]	GO:0003924; GO:0005096; GO:0046872
TRINITY_DN161_c0_g1_i3	36332.6	7884.57	0.000103489	0.353835	Upregulated	SA-E vs SA	AGRB_STAAC	Accessory gene regulator protein B (EC 3.4.-.-)	agrB SACOL2023		proteolysis [GO:0006508]; quorum sensing [GO:0009372]	plasma membrane [GO:0005886]	peptidase activity [GO:0008233]		agrB	3.4.-.-	FUNCTION: Essential for the production of a quorum sensing system signal molecule, the autoinducing peptide (AIP). This quorum sensing system is responsible for the regulation of the expression of virulence factor genes. Involved in the proteolytic processing of AgrD, the precursor of AIP. {ECO:0000255|HAMAP-Rule:MF_00784}.	Staphylococcus aureus (strain COL)	AGRB_STAAC	UPI0000000818	plasma membrane [GO:0005886]; peptidase activity [GO:0008233]; proteolysis [GO:0006508]; quorum sensing [GO:0009372]	GO:0005886; GO:0006508; GO:0008233; GO:0009372
TRINITY_DN191_c0_g2_i1	26393	6935	2.09472e-07	0.504862	Upregulated	SA-E vs SA	AHPC_STAAR	Alkyl hydroperoxide reductase C (EC 1.11.1.26) (Peroxiredoxin) (Thioredoxin peroxidase)	ahpC SAR0399		cell redox homeostasis [GO:0045454]; cellular response to stress [GO:0033554]; hydrogen peroxide catabolic process [GO:0042744]; response to oxidative stress [GO:0006979]	cytosol [GO:0005829]	NADH-dependent peroxiredoxin activity [GO:0102039]; thioredoxin peroxidase activity [GO:0008379]		ahpC	1.11.1.26	FUNCTION: Thiol-specific peroxidase that catalyzes the reduction of hydrogen peroxide and organic hydroperoxides to water and alcohols, respectively. Plays a role in cell protection against oxidative stress by detoxifying peroxides. {ECO:0000250|UniProtKB:P0A251}.	Staphylococcus aureus (strain MRSA252)	AHPC_STAAR	UPI0000054552	cytosol [GO:0005829]; NADH-dependent peroxiredoxin activity [GO:0102039]; thioredoxin peroxidase activity [GO:0008379]; cell redox homeostasis [GO:0045454]; cellular response to stress [GO:0033554]; hydrogen peroxide catabolic process [GO:0042744]; response to oxidative stress [GO:0006979]	GO:0005829; GO:0006979; GO:0008379; GO:0033554; GO:0042744; GO:0045454; GO:0102039
TRINITY_DN3890_c1_g1_i1	124	4	0.00441553	-1.15113	Downregulated	SA-E vs SA	ALDA_STAAC	Putative aldehyde dehydrogenase AldA (EC 1.2.1.3)	aldA SACOL0154				aldehyde dehydrogenase (NAD+) activity [GO:0004029]		aldA	1.2.1.3		Staphylococcus aureus (strain COL)	ALDA_STAAC	UPI00000546D8	aldehyde dehydrogenase (NAD+) activity [GO:0004029]	GO:0004029
TRINITY_DN1515_c0_g1_i1	127	5	0.0117205	-0.993825	Downregulated	SA-E vs SA	ALDA_STAAM	Putative aldehyde dehydrogenase AldA (EC 1.2.1.3)	aldA SAV0167				aldehyde dehydrogenase (NAD+) activity [GO:0004029]		aldA	1.2.1.3		Staphylococcus aureus (strain Mu50 / ATCC 700699)	ALDA_STAAM	UPI00000D76C3	aldehyde dehydrogenase (NAD+) activity [GO:0004029]	GO:0004029
TRINITY_DN10932_c2_g2_i1	1	6	0.0011292	2.97469	Upregulated	SA-E vs SA	ALDH_STAAW	Putative aldehyde dehydrogenase (EC 1.2.1.3)	MW2046		aldehyde metabolic process [GO:0006081]		aldehyde dehydrogenase (NAD+) activity [GO:0004029]			1.2.1.3		Staphylococcus aureus (strain MW2)	ALDH_STAAW	UPI00000D9F36	aldehyde dehydrogenase (NAD+) activity [GO:0004029]; aldehyde metabolic process [GO:0006081]	GO:0004029; GO:0006081
TRINITY_DN4383_c0_g1_i1	11	1	0.047285	-0.333114	Downregulated	SA-E vs SA	AMPN_STRLI	Aminopeptidase N (EC 3.4.11.2) (Alanine aminopeptidase) (Lysyl aminopeptidase) (Lys-AP)	pepN		peptide catabolic process [GO:0043171]; proteolysis [GO:0006508]	cytoplasm [GO:0005737]; extracellular space [GO:0005615]; membrane [GO:0016020]	metalloaminopeptidase activity [GO:0070006]; peptide binding [GO:0042277]; zinc ion binding [GO:0008270]		pepN	3.4.11.2	FUNCTION: Aminopeptidase with broad substrate specificity to several peptides. Shows strong preference for leucine but cleaves also next to Arg and lysine in peptide-bond-containing substrates.	Streptomyces lividans	AMPN_STRLI	UPI0000125A1D	cytoplasm [GO:0005737]; extracellular space [GO:0005615]; membrane [GO:0016020]; metalloaminopeptidase activity [GO:0070006]; peptide binding [GO:0042277]; zinc ion binding [GO:0008270]; peptide catabolic process [GO:0043171]; proteolysis [GO:0006508]	GO:0005615; GO:0005737; GO:0006508; GO:0008270; GO:0016020; GO:0042277; GO:0043171; GO:0070006
TRINITY_DN4497_c0_g2_i3	1697.96	355	0.0008473	0.32442	Upregulated	SA-E vs SA	ARCC1_STAAM	Carbamate kinase 1 (EC 2.7.2.2)	arcC1 SAV1170	PATHWAY: Metabolic intermediate metabolism; carbamoyl phosphate degradation; CO(2) and NH(3) from carbamoyl phosphate: step 1/1.	arginine deiminase pathway [GO:0019546]	cytosol [GO:0005829]	ATP binding [GO:0005524]; carbamate kinase activity [GO:0008804]		arcC1	2.7.2.2		Staphylococcus aureus (strain Mu50 / ATCC 700699)	ARCC1_STAAM	UPI00000D7653	cytosol [GO:0005829]; ATP binding [GO:0005524]; carbamate kinase activity [GO:0008804]; arginine deiminase pathway [GO:0019546]	GO:0005524; GO:0005829; GO:0008804; GO:0019546
TRINITY_DN16513_c0_g2_i1	581	31	0.000182105	-0.753823	Downregulated	SA-E vs SA	ARCC2_STAA8	Carbamate kinase 2 (EC 2.7.2.2)	arcC2 arcC SAOUHSC_02965	PATHWAY: Metabolic intermediate metabolism; carbamoyl phosphate degradation; CO(2) and NH(3) from carbamoyl phosphate: step 1/1.	arginine deiminase pathway [GO:0019546]	cytosol [GO:0005829]	ATP binding [GO:0005524]; carbamate kinase activity [GO:0008804]		arcC2	2.7.2.2		Staphylococcus aureus (strain NCTC 8325 / PS 47)	ARCC2_STAA8	UPI00001A9C89	cytosol [GO:0005829]; ATP binding [GO:0005524]; carbamate kinase activity [GO:0008804]; arginine deiminase pathway [GO:0019546]	GO:0005524; GO:0005829; GO:0008804; GO:0019546
TRINITY_DN41701_c0_g1_i1	54	15	0.0340935	0.548746	Upregulated	SA-E vs SA	ARCR_STAAC	HTH-type transcriptional regulator ArcR	arcR SACOL2653		regulation of DNA-templated transcription [GO:0006355]	cytoplasm [GO:0005737]	cAMP binding [GO:0030552]; DNA binding [GO:0003677]		arcR		FUNCTION: Positively regulates the expression of the arcABDCR operon under anaerobic conditions, thus playing an essential role in arginine catabolism. May also control the expression of genes encoding proteins which are involved in anaerobic metabolism. Can bind cyclic AMP (By similarity). {ECO:0000250}.	Staphylococcus aureus (strain COL)	ARCR_STAAC	UPI0000054928	cytoplasm [GO:0005737]; cAMP binding [GO:0030552]; DNA binding [GO:0003677]; regulation of DNA-templated transcription [GO:0006355]	GO:0003677; GO:0005737; GO:0006355; GO:0030552
TRINITY_DN3882_c0_g2_i3	395.3	124.73	3.01536e-07	0.649363	Upregulated	SA-E vs SA	ARGR_STAAR	Arginine repressor	argR SAR1598	PATHWAY: Amino-acid biosynthesis; L-arginine biosynthesis [regulation].	L-arginine biosynthetic process [GO:0006526]; protein complex oligomerization [GO:0051259]; regulation of arginine biosynthetic process [GO:1900079]	cytoplasm [GO:0005737]	arginine binding [GO:0034618]; DNA binding [GO:0003677]; DNA-binding transcription factor activity [GO:0003700]		argR		FUNCTION: Regulates arginine biosynthesis genes. {ECO:0000255|HAMAP-Rule:MF_00173}.	Staphylococcus aureus (strain MRSA252)	ARGR_STAAR	UPI00000D783E	cytoplasm [GO:0005737]; arginine binding [GO:0034618]; DNA binding [GO:0003677]; DNA-binding transcription factor activity [GO:0003700]; L-arginine biosynthetic process [GO:0006526]; protein complex oligomerization [GO:0051259]; regulation of arginine biosynthetic process [GO:1900079]	GO:0003677; GO:0003700; GO:0005737; GO:0006526; GO:0034618; GO:0051259; GO:1900079
TRINITY_DN8060_c0_g2_i1	18	15	4.04722e-05	1.41612	Upregulated	SA-E vs SA	ARLR_STAAR	Response regulator ArlR	arlR SAR1427		regulation of DNA-templated transcription [GO:0006355]	cytosol [GO:0005829]; protein-DNA complex [GO:0032993]	phosphorelay response regulator activity [GO:0000156]; transcription cis-regulatory region binding [GO:0000976]		arlR		FUNCTION: Member of the two-component regulatory system ArlS/ArlR involved in the regulation of adhesion, autolysis, multidrug resistance and virulence. {ECO:0000250}.	Staphylococcus aureus (strain MRSA252)	ARLR_STAAR	UPI000002E8B9	cytosol [GO:0005829]; protein-DNA complex [GO:0032993]; phosphorelay response regulator activity [GO:0000156]; transcription cis-regulatory region binding [GO:0000976]; regulation of DNA-templated transcription [GO:0006355]	GO:0000156; GO:0000976; GO:0005829; GO:0006355; GO:0032993
TRINITY_DN373_c0_g4_i1	64.94	1	0.0120982	-1.73496	Downregulated	SA-E vs SA	AROC_STAAC	Chorismate synthase (CS) (EC 4.2.3.5) (5-enolpyruvylshikimate-3-phosphate phospholyase)	aroC SACOL1506	PATHWAY: Metabolic intermediate biosynthesis; chorismate biosynthesis; chorismate from D-erythrose 4-phosphate and phosphoenolpyruvate: step 7/7. {ECO:0000255|HAMAP-Rule:MF_00300}.	amino acid biosynthetic process [GO:0008652]; aromatic amino acid family biosynthetic process [GO:0009073]; chorismate biosynthetic process [GO:0009423]	cytosol [GO:0005829]	chorismate synthase activity [GO:0004107]; FMN binding [GO:0010181]		aroC	4.2.3.5	FUNCTION: Catalyzes the anti-1,4-elimination of the C-3 phosphate and the C-6 proR hydrogen from 5-enolpyruvylshikimate-3-phosphate (EPSP) to yield chorismate, which is the branch point compound that serves as the starting substrate for the three terminal pathways of aromatic amino acid biosynthesis. This reaction introduces a second double bond into the aromatic ring system. {ECO:0000255|HAMAP-R…	Staphylococcus aureus (strain COL)	AROC_STAAC	UPI00004B5BF9	cytosol [GO:0005829]; chorismate synthase activity [GO:0004107]; FMN binding [GO:0010181]; amino acid biosynthetic process [GO:0008652]; aromatic amino acid family biosynthetic process [GO:0009073]; chorismate biosynthetic process [GO:0009423]	GO:0004107; GO:0005829; GO:0008652; GO:0009073; GO:0009423; GO:0010181
TRINITY_DN1243_c0_g3_i1	152	4	0.000588384	-1.31187	Downregulated	SA-E vs SA	AROD_STAAB	3-dehydroquinate dehydratase (3-dehydroquinase) (EC 4.2.1.10) (Type I DHQase) (Type I dehydroquinase) (DHQ1)	aroD SAB0760	PATHWAY: Metabolic intermediate biosynthesis; chorismate biosynthesis; chorismate from D-erythrose 4-phosphate and phosphoenolpyruvate: step 3/7. {ECO:0000255|HAMAP-Rule:MF_00214}.	3,4-dihydroxybenzoate biosynthetic process [GO:0046279]; amino acid biosynthetic process [GO:0008652]; aromatic amino acid family biosynthetic process [GO:0009073]; chorismate biosynthetic process [GO:0009423]		3-dehydroquinate dehydratase activity [GO:0003855]		aroD	4.2.1.10	FUNCTION: Involved in the third step of the chorismate pathway, which leads to the biosynthesis of aromatic amino acids. Catalyzes the cis-dehydration of 3-dehydroquinate (DHQ) and introduces the first double bond of the aromatic ring to yield 3-dehydroshikimate. {ECO:0000255|HAMAP-Rule:MF_00214}.	Staphylococcus aureus (strain bovine RF122 / ET3-1)	AROD_STAAB	UPI00005FE369	3-dehydroquinate dehydratase activity [GO:0003855]; 3,4-dihydroxybenzoate biosynthetic process [GO:0046279]; amino acid biosynthetic process [GO:0008652]; aromatic amino acid family biosynthetic process [GO:0009073]; chorismate biosynthetic process [GO:0009423]	GO:0003855; GO:0008652; GO:0009073; GO:0009423; GO:0046279
TRINITY_DN41218_c0_g1_i1	116	5	0.0210435	-0.922297	Downregulated	SA-E vs SA	AROG_BACSU	Protein AroA(G) [Includes: Phospho-2-dehydro-3-deoxyheptonate aldolase (EC 2.5.1.54) (3-deoxy-D-arabino-heptulosonate 7-phosphate synthase) (DAHP synthase) (Phospho-2-keto-3-deoxyheptonate aldolase); Chorismate mutase (EC 5.4.99.5)]	aroA BSU29750	PATHWAY: Metabolic intermediate biosynthesis; chorismate biosynthesis; chorismate from D-erythrose 4-phosphate and phosphoenolpyruvate: step 1/7.; PATHWAY: Metabolic intermediate biosynthesis; prephenate biosynthesis; prephenate from chorismate: step 1/1.	amino acid biosynthetic process [GO:0008652]; aromatic amino acid family biosynthetic process [GO:0009073]; chorismate biosynthetic process [GO:0009423]		3-deoxy-7-phosphoheptulonate synthase activity [GO:0003849]; aldehyde-lyase activity [GO:0016832]; chorismate mutase activity [GO:0004106]		aroA	2.5.1.54; 5.4.99.5		Bacillus subtilis (strain 168)	AROG_BACSU	UPI00000608F5	3-deoxy-7-phosphoheptulonate synthase activity [GO:0003849]; aldehyde-lyase activity [GO:0016832]; chorismate mutase activity [GO:0004106]; amino acid biosynthetic process [GO:0008652]; aromatic amino acid family biosynthetic process [GO:0009073]; chorismate biosynthetic process [GO:0009423]	GO:0003849; GO:0004106; GO:0008652; GO:0009073; GO:0009423; GO:0016832
TRINITY_DN10833_c0_g1_i1	129	3	0.000945626	-1.40947	Downregulated	SA-E vs SA	ASP2_STAA8	Accessory Sec system protein Asp2 (Accessory secretory protein Asp2)	asp2 SAOUHSC_02987		protein transport [GO:0015031]				asp2		FUNCTION: Part of the accessory SecA2/SecY2 system specifically required to export SraP, a serine-rich repeat cell wall protein encoded upstream in the same operon. {ECO:0000269|PubMed:18621893}.	Staphylococcus aureus (strain NCTC 8325 / PS 47)	ASP2_STAA8	UPI0000696CF3	protein transport [GO:0015031]	GO:0015031
TRINITY_DN10531_c0_g1_i3	6125.82	1252.04	0.000679555	0.306519	Upregulated	SA-E vs SA	ASP23_STAAR	Alkaline shock protein 23	asp23 SAR2273						asp23		FUNCTION: May play a key role in alkaline pH tolerance. {ECO:0000250}.	Staphylococcus aureus (strain MRSA252)	ASP23_STAAR	UPI0000054BEA
TRINITY_DN797_c0_g1_i3	4701.23	302.67	1.89864e-05	-0.60553	Downregulated	SA-E vs SA	ASSY_STAAC	Argininosuccinate synthase (EC 6.3.4.5) (Citrulline--aspartate ligase)	argG SACOL0964	PATHWAY: Amino-acid biosynthesis; L-arginine biosynthesis; L-arginine from L-ornithine and carbamoyl phosphate: step 2/3. {ECO:0000255|HAMAP-Rule:MF_00005}.	argininosuccinate metabolic process [GO:0000053]; L-arginine biosynthetic process [GO:0006526]; urea cycle [GO:0000050]	cytoplasm [GO:0005737]	argininosuccinate synthase activity [GO:0004055]; ATP binding [GO:0005524]		argG	6.3.4.5		Staphylococcus aureus (strain COL)	ASSY_STAAC	UPI000012619A	cytoplasm [GO:0005737]; argininosuccinate synthase activity [GO:0004055]; ATP binding [GO:0005524]; argininosuccinate metabolic process [GO:0000053]; L-arginine biosynthetic process [GO:0006526]; urea cycle [GO:0000050]	GO:0000050; GO:0000053; GO:0004055; GO:0005524; GO:0005737; GO:0006526
TRINITY_DN41_c0_g2_i6	2784.21	493.62	0.0188356	0.194238	Upregulated	SA-E vs SA	ATL_STAA1	Bifunctional autolysin [Includes: N-acetylmuramoyl-L-alanine amidase (EC 3.5.1.28); Mannosyl-glycoprotein endo-beta-N-acetylglucosaminidase (EC 3.2.1.96)]	atl nag SAHV_1045		cell wall organization [GO:0071555]; peptidoglycan catabolic process [GO:0009253]	extracellular region [GO:0005576]	amidase activity [GO:0004040]; mannosyl-glycoprotein endo-beta-N-acetylglucosaminidase activity [GO:0033925]; N-acetylmuramoyl-L-alanine amidase activity [GO:0008745]		atl	3.2.1.96; 3.5.1.28	FUNCTION: Endohydrolysis of the di-N-acetylchitobiosyl unit in high-mannose glycopeptides and glycoproteins containing the -[(Man)5(GlcNAc)2]-Asn structure. One N-acetyl-D-glucosamine residue remains attached to the protein; the rest of the oligosaccharide is released intact. Cleaves the peptidoglycan connecting the daughter cells at the end of the cell division cycle, resulting in the separation…	Staphylococcus aureus (strain Mu3 / ATCC 700698)	ATL_STAA1	UPI000019C458	extracellular region [GO:0005576]; amidase activity [GO:0004040]; mannosyl-glycoprotein endo-beta-N-acetylglucosaminidase activity [GO:0033925]; N-acetylmuramoyl-L-alanine amidase activity [GO:0008745]; cell wall organization [GO:0071555]; peptidoglycan catabolic process [GO:0009253]	GO:0004040; GO:0005576; GO:0008745; GO:0009253; GO:0033925; GO:0071555
TRINITY_DN41_c0_g2_i1	134.89	194.61	2.09279e-37	1.84945	Upregulated	SA-E vs SA	ATL_STAAW	Bifunctional autolysin [Includes: N-acetylmuramoyl-L-alanine amidase (EC 3.5.1.28); Mannosyl-glycoprotein endo-beta-N-acetylglucosaminidase (EC 3.2.1.96)]	atl nag MW0936		cell wall organization [GO:0071555]; peptidoglycan catabolic process [GO:0009253]	extracellular region [GO:0005576]	amidase activity [GO:0004040]; mannosyl-glycoprotein endo-beta-N-acetylglucosaminidase activity [GO:0033925]; N-acetylmuramoyl-L-alanine amidase activity [GO:0008745]		atl	3.2.1.96; 3.5.1.28	FUNCTION: Endohydrolysis of the di-N-acetylchitobiosyl unit in high-mannose glycopeptides and glycoproteins containing the -[(Man)5(GlcNAc)2]-Asn structure. One N-acetyl-D-glucosamine residue remains attached to the protein; the rest of the oligosaccharide is released intact. Cleaves the peptidoglycan connecting the daughter cells at the end of the cell division cycle, resulting in the separation…	Staphylococcus aureus (strain MW2)	ATL_STAAW	UPI00000D9D64	extracellular region [GO:0005576]; amidase activity [GO:0004040]; mannosyl-glycoprotein endo-beta-N-acetylglucosaminidase activity [GO:0033925]; N-acetylmuramoyl-L-alanine amidase activity [GO:0008745]; cell wall organization [GO:0071555]; peptidoglycan catabolic process [GO:0009253]	GO:0004040; GO:0005576; GO:0008745; GO:0009253; GO:0033925; GO:0071555
TRINITY_DN42156_c0_g1_i1	8	2	6.38187e-09	0.465563	Upregulated	SA-E vs SA	ATP6_SALTI	ATP synthase subunit a (ATP synthase F0 sector subunit a) (F-ATPase subunit 6)	atpB STY3907 t3648		proton motive force-driven plasma membrane ATP synthesis [GO:0042777]	plasma membrane [GO:0005886]; proton-transporting ATP synthase complex, coupling factor F(o) [GO:0045263]	proton-transporting ATP synthase activity, rotational mechanism [GO:0046933]		atpB		FUNCTION: Key component of the proton channel; it plays a direct role in the translocation of protons across the membrane. {ECO:0000255|HAMAP-Rule:MF_01393}.	Salmonella typhi	ATP6_SALTI	UPI000005A67A	plasma membrane [GO:0005886]; proton-transporting ATP synthase complex, coupling factor F(o) [GO:0045263]; proton-transporting ATP synthase activity, rotational mechanism [GO:0046933]; proton motive force-driven plasma membrane ATP synthesis [GO:0042777]	GO:0005886; GO:0042777; GO:0045263; GO:0046933
TRINITY_DN83_c0_g2_i5	10924.1	467.55	1.51754e-12	-0.92788	Downregulated	SA-E vs SA	ATPF_STAAR	ATP synthase subunit b (ATP synthase F(0) sector subunit b) (ATPase subunit I) (F-type ATPase subunit b) (F-ATPase subunit b)	atpF SAR2195			plasma membrane [GO:0005886]; proton-transporting ATP synthase complex, coupling factor F(o) [GO:0045263]	proton-transporting ATP synthase activity, rotational mechanism [GO:0046933]; proton-transporting ATPase activity, rotational mechanism [GO:0046961]		atpF		FUNCTION: F(1)F(0) ATP synthase produces ATP from ADP in the presence of a proton or sodium gradient. F-type ATPases consist of two structural domains, F(1) containing the extramembraneous catalytic core and F(0) containing the membrane proton channel, linked together by a central stalk and a peripheral stalk. During catalysis, ATP synthesis in the catalytic domain of F(1) is coupled via a rotary…	Staphylococcus aureus (strain MRSA252)	ATPF_STAAR	UPI00003B1860	plasma membrane [GO:0005886]; proton-transporting ATP synthase complex, coupling factor F(o) [GO:0045263]; proton-transporting ATP synthase activity, rotational mechanism [GO:0046933]; proton-transporting ATPase activity, rotational mechanism [GO:0046961]	GO:0005886; GO:0045263; GO:0046933; GO:0046961
TRINITY_DN50100_c0_g1_i1	79	63	3.53324e-14	1.38139	Upregulated	SA-E vs SA	ATPZ_PSEAE	ATP synthase protein I	atpI PA5561		proton transmembrane transport [GO:1902600]	plasma membrane [GO:0005886]; proton-transporting ATP synthase complex, coupling factor F(o) [GO:0045263]			atpI		FUNCTION: A possible function for this protein is to guide the assembly of the membrane sector of the ATPase enzyme complex. {ECO:0000250}.	Pseudomonas aeruginosa (strain ATCC 15692 / DSM 22644 / CIP 104116 / JCM 14847 / LMG 12228 / 1C / PRS 101 / PAO1)	ATPZ_PSEAE	UPI00000C6073	plasma membrane [GO:0005886]; proton-transporting ATP synthase complex, coupling factor F(o) [GO:0045263]; proton transmembrane transport [GO:1902600]	GO:0005886; GO:0045263; GO:1902600
TRINITY_DN6448_c0_g1_i5	4019.92	257.94	2.07515e-05	-0.608178	Downregulated	SA-E vs SA	ATRF2_STAAW	Putative acetyltransferase MW2476 (EC 2.3.1.-)	MW2476				galactoside O-acetyltransferase activity [GO:0008870]			2.3.1.-		Staphylococcus aureus (strain MW2)	ATRF2_STAAW	UPI00000DA009	galactoside O-acetyltransferase activity [GO:0008870]	GO:0008870
TRINITY_DN1535_c0_g2_i1	11	16	1.75007e-07	1.85589	Upregulated	SA-E vs SA	ATSE2_PSEAE	Acetyltransferase PA2578 (EC 2.3.1.-) (GCN5-related N-acetyltransferase) (GNAT)	PA2578				acyltransferase activity, transferring groups other than amino-acyl groups [GO:0016747]			2.3.1.-	FUNCTION: Catalyzes the transfer of an acetyl group from acetyl coenzyme A (AcCoA) to an acceptor substrate and releases both CoA and the acetylated product. It prefers the antibiotic chloramphenicol. {ECO:0000269|PubMed:23184347}.	Pseudomonas aeruginosa (strain ATCC 15692 / DSM 22644 / CIP 104116 / JCM 14847 / LMG 12228 / 1C / PRS 101 / PAO1)	ATSE2_PSEAE	UPI00000C574C	acyltransferase activity, transferring groups other than amino-acyl groups [GO:0016747]	GO:0016747
TRINITY_DN2861_c0_g1_i3	487.68	31.9	0.00570918	-0.59299	Downregulated	SA-E vs SA	AZO1_STAAM	FMN-dependent NADPH-azoreductase (EC 1.7.-.-) (NADPH-dependent flavo-azoreductase) (NADPH-flavin azoreductase)	azo1 SAV0560			cytosol [GO:0005829]	FMN binding [GO:0010181]; oxidoreductase activity [GO:0016491]		azo1	1.7.-.-	FUNCTION: Catalyzes the reductive cleavage of azo bond in aromatic azo compounds to the corresponding amines. Requires NADPH, but not NADH, as an electron donor for its activity (By similarity). {ECO:0000250}.	Staphylococcus aureus (strain Mu50 / ATCC 700699)	AZO1_STAAM	UPI0000054828	cytosol [GO:0005829]; FMN binding [GO:0010181]; oxidoreductase activity [GO:0016491]	GO:0005829; GO:0010181; GO:0016491
TRINITY_DN3738_c0_g1_i1	111	4	0.0107729	-1.06369	Downregulated	SA-E vs SA	AZOR_STAAB	FMN-dependent NADH:quinone oxidoreductase (EC 1.6.5.-) (Azo-dye reductase) (FMN-dependent NADH-azo compound oxidoreductase) (FMN-dependent NADH-azoreductase) (EC 1.7.1.17)	azoR SAB0149c				electron transfer activity [GO:0009055]; FMN binding [GO:0010181]; oxidoreductase activity, acting on NAD(P)H as acceptor [GO:0016652]; oxidoreductase activity, acting on NAD(P)H, quinone or similar compound as acceptor [GO:0016655]		azoR	1.6.5.-; 1.7.1.17	FUNCTION: Quinone reductase that provides resistance to thiol-specific stress caused by electrophilic quinones. {ECO:0000255|HAMAP-Rule:MF_01216}.; FUNCTION: Also exhibits azoreductase activity. Catalyzes the reductive cleavage of the azo bond in aromatic azo compounds to the corresponding amines. {ECO:0000255|HAMAP-Rule:MF_01216}.	Staphylococcus aureus (strain bovine RF122 / ET3-1)	AZOR_STAAB	UPI0000DA5A20	electron transfer activity [GO:0009055]; FMN binding [GO:0010181]; oxidoreductase activity, acting on NAD(P)H as acceptor [GO:0016652]; oxidoreductase activity, acting on NAD(P)H, quinone or similar compound as acceptor [GO:0016655]	GO:0009055; GO:0010181; GO:0016652; GO:0016655
TRINITY_DN763_c0_g3_i1	165	39	0.00992211	0.421279	Upregulated	SA-E vs SA	BBP_STAAU	Bone sialoprotein-binding protein (BSP-binding protein)	bbp		cell adhesion [GO:0007155]	extracellular region [GO:0005576]			bbp		FUNCTION: Specifically interacts with bone sialoprotein (BSP), a glycoprotein of bone and dentin extracellular matrix. Could contribute to staphylococcal osteomyelitis and arthritis. {ECO:0000269|PubMed:10642520}.	Staphylococcus aureus	BBP_STAAU	UPI0000DAC77D	extracellular region [GO:0005576]; cell adhesion [GO:0007155]	GO:0005576; GO:0007155
TRINITY_DN11123_c0_g1_i1	368	28	0.046012	-0.473635	Downregulated	SA-E vs SA	BETL_LISMN	Glycine betaine transporter BetL (Glycine betaine-Na(+) symporter)	betL		amino acid transport [GO:0006865]; glycine betaine transport [GO:0031460]; response to cold [GO:0009409]; response to osmotic stress [GO:0006970]	plasma membrane [GO:0005886]	amino-acid betaine transmembrane transporter activity [GO:0015199]		betL		FUNCTION: High-affinity uptake of glycine betaine, driven by a sodium-motive force. Involved, with GbuABC and OpuC, in osmoprotection and cryoprotection of Listeria. Does not mediate either carnitine or choline uptake. {ECO:0000269|PubMed:10224004, ECO:0000269|PubMed:14645273, ECO:0000269|PubMed:15128551}.	Listeria monocytogenes	BETL_LISMN	UPI00000D0101	plasma membrane [GO:0005886]; amino-acid betaine transmembrane transporter activity [GO:0015199]; amino acid transport [GO:0006865]; glycine betaine transport [GO:0031460]; response to cold [GO:0009409]; response to osmotic stress [GO:0006970]	GO:0005886; GO:0006865; GO:0006970; GO:0009409; GO:0015199; GO:0031460
TRINITY_DN32393_c0_g1_i1	65	26	0.000267908	0.836639	Upregulated	SA-E vs SA	BINL_STAAU	Transposon Tn552 resolvase	tnpR binL		DNA integration [GO:0015074]		DNA binding [GO:0003677]; DNA strand exchange activity [GO:0000150]		tnpR		FUNCTION: Resolvase catalyzes the resolution (a site-specific recombination) of the cointegrated replicon to yield the final transposition products. {ECO:0000269|PubMed:2555186}.	Staphylococcus aureus	BINL_STAAU	UPI000012694A	DNA binding [GO:0003677]; DNA strand exchange activity [GO:0000150]; DNA integration [GO:0015074]	GO:0000150; GO:0003677; GO:0015074
TRINITY_DN360_c0_g2_i1	42	34	2.8254e-09	1.39323	Upregulated	SA-E vs SA	BIOD_PSEAE	ATP-dependent dethiobiotin synthetase BioD (EC 6.3.3.3) (DTB synthetase) (DTBS) (Dethiobiotin synthase)	bioD PA0504	PATHWAY: Cofactor biosynthesis; biotin biosynthesis; biotin from 7,8-diaminononanoate: step 1/2. {ECO:0000255|HAMAP-Rule:MF_00336}.	biotin biosynthetic process [GO:0009102]	cytosol [GO:0005829]	ATP binding [GO:0005524]; dethiobiotin synthase activity [GO:0004141]; magnesium ion binding [GO:0000287]		bioD	6.3.3.3	FUNCTION: Catalyzes a mechanistically unusual reaction, the ATP-dependent insertion of CO2 between the N7 and N8 nitrogen atoms of 7,8-diaminopelargonic acid (DAPA, also called 7,8-diammoniononanoate) to form a ureido ring. {ECO:0000255|HAMAP-Rule:MF_00336}.	Pseudomonas aeruginosa (strain ATCC 15692 / DSM 22644 / CIP 104116 / JCM 14847 / LMG 12228 / 1C / PRS 101 / PAO1)	BIOD_PSEAE	UPI000012697C	cytosol [GO:0005829]; ATP binding [GO:0005524]; dethiobiotin synthase activity [GO:0004141]; magnesium ion binding [GO:0000287]; biotin biosynthetic process [GO:0009102]	GO:0000287; GO:0004141; GO:0005524; GO:0005829; GO:0009102
TRINITY_DN92_c0_g3_i2	2413.4	165.53	0.00026879	-0.555556	Downregulated	SA-E vs SA	BIOD_STAES	ATP-dependent dethiobiotin synthetase BioD (EC 6.3.3.3) (DTB synthetase) (DTBS) (Dethiobiotin synthase)	bioD SE_0179	PATHWAY: Cofactor biosynthesis; biotin biosynthesis; biotin from 7,8-diaminononanoate: step 1/2. {ECO:0000255|HAMAP-Rule:MF_00336}.	biotin biosynthetic process [GO:0009102]	cytosol [GO:0005829]	ATP binding [GO:0005524]; dethiobiotin synthase activity [GO:0004141]; magnesium ion binding [GO:0000287]		bioD	6.3.3.3	FUNCTION: Catalyzes a mechanistically unusual reaction, the ATP-dependent insertion of CO2 between the N7 and N8 nitrogen atoms of 7,8-diaminopelargonic acid (DAPA, also called 7,8-diammoniononanoate) to form a ureido ring. {ECO:0000255|HAMAP-Rule:MF_00336}.	Staphylococcus epidermidis (strain ATCC 12228 / FDA PCI 1200)	BIOD_STAES	UPI00000E5120	cytosol [GO:0005829]; ATP binding [GO:0005524]; dethiobiotin synthase activity [GO:0004141]; magnesium ion binding [GO:0000287]; biotin biosynthetic process [GO:0009102]	GO:0000287; GO:0004141; GO:0005524; GO:0005829; GO:0009102
TRINITY_DN92_c0_g2_i1	1365.87	85.32	0.000108234	-0.629375	Downregulated	SA-E vs SA	BIOW_STAAC	6-carboxyhexanoate--CoA ligase (EC 6.2.1.14) (Pimeloyl-CoA synthase)	bioW SACOL2424	PATHWAY: Metabolic intermediate metabolism; pimeloyl-CoA biosynthesis; pimeloyl-CoA from pimelate: step 1/1. {ECO:0000255|HAMAP-Rule:MF_00668}.	biotin biosynthetic process [GO:0009102]		6-carboxyhexanoate-CoA ligase activity [GO:0042410]; ATP binding [GO:0005524]; magnesium ion binding [GO:0000287]		bioW	6.2.1.14	FUNCTION: Catalyzes the transformation of pimelate into pimeloyl-CoA with concomitant hydrolysis of ATP to AMP. {ECO:0000255|HAMAP-Rule:MF_00668}.	Staphylococcus aureus (strain COL)	BIOW_STAAC	UPI00000CAA5A	6-carboxyhexanoate-CoA ligase activity [GO:0042410]; ATP binding [GO:0005524]; magnesium ion binding [GO:0000287]; biotin biosynthetic process [GO:0009102]	GO:0000287; GO:0005524; GO:0009102; GO:0042410
TRINITY_DN90_c0_g1_i5	1080.88	1065.07	6.37075e-39	1.54843	Upregulated	SA-E vs SA	BLAI_STAES	Penicillinase repressor (Beta-lactamase repressor protein) (Regulatory protein BlaI)	blaI penI SE_p508		negative regulation of DNA-templated transcription [GO:0045892]; response to antibiotic [GO:0046677]	cytoplasm [GO:0005737]	DNA binding [GO:0003677]		blaI		FUNCTION: Transcriptional repressor that constitutively blocks expression of beta-lactamase. Binds DNA as a dimer (By similarity). {ECO:0000250}.	Staphylococcus epidermidis (strain ATCC 12228 / FDA PCI 1200)	BLAI_STAES	UPI00001269E0	cytoplasm [GO:0005737]; DNA binding [GO:0003677]; negative regulation of DNA-templated transcription [GO:0045892]; response to antibiotic [GO:0046677]	GO:0003677; GO:0005737; GO:0045892; GO:0046677
TRINITY_DN86_c0_g1_i44	410.74	24.71	0.00398745	-0.659072	Downregulated	SA-E vs SA	BRNQL_STAAM	Putative branched-chain amino acid carrier protein SAV1407	SAV1407		isoleucine transport [GO:0015818]; L-leucine transport [GO:0015820]	plasma membrane [GO:0005886]	L-isoleucine transmembrane transporter activity [GO:0015188]; L-leucine transmembrane transporter activity [GO:0015190]; L-valine transmembrane transporter activity [GO:0005304]				FUNCTION: Component of the transport system for branched-chain amino acids (leucine, isoleucine and valine), which is coupled to a proton motive force (Potential). Contributes to NaCl tolerance (By similarity). {ECO:0000250, ECO:0000305}.	Staphylococcus aureus (strain Mu50 / ATCC 700699)	BRNQL_STAAM	UPI0000054A6D	plasma membrane [GO:0005886]; L-isoleucine transmembrane transporter activity [GO:0015188]; L-leucine transmembrane transporter activity [GO:0015190]; L-valine transmembrane transporter activity [GO:0005304]; isoleucine transport [GO:0015818]; L-leucine transport [GO:0015820]	GO:0005304; GO:0005886; GO:0015188; GO:0015190; GO:0015818; GO:0015820
TRINITY_DN32701_c0_g1_i1	180	38	0.0364278	0.332074	Upregulated	SA-E vs SA	BSAA_STAAR	Glutathione peroxidase homolog BsaA	bsaA SAR1280		cellular response to oxidative stress [GO:0034599]		peroxidase activity [GO:0004601]		bsaA			Staphylococcus aureus (strain MRSA252)	BSAA_STAAR	UPI0000054618	peroxidase activity [GO:0004601]; cellular response to oxidative stress [GO:0034599]	GO:0004601; GO:0034599
TRINITY_DN411_c1_g4_i1	18	14	0.000103608	1.36165	Upregulated	SA-E vs SA	BTST_ECOLI	Pyruvate/proton symporter BtsT (Brenztraubensaure transporter) (Pyruvate/H(+) symporter)	btsT yjiY b4354 JW5791		cellular response to nutrient levels [GO:0031669]; cellular response to starvation [GO:0009267]; DNA damage response [GO:0006974]; plasma membrane pyruvate transport [GO:0006849]	plasma membrane [GO:0005886]	pyruvate secondary active transmembrane transporter activity [GO:0005477]; symporter activity [GO:0015293]		btsT		FUNCTION: Transports pyruvate with a high affinity and specificity. The process is driven by the proton motive force (PubMed:29061664). Under nutrient limiting conditions, mediates the uptake of pyruvate, thus enabling it to be used as a carbon source for the growth and survival (PubMed:29061664). Part of a nutrient-sensing regulatory network composed of the two-component regulatory systems BtsS/…	Escherichia coli (strain K12)	BTST_ECOLI	UPI0000683EA8	plasma membrane [GO:0005886]; pyruvate secondary active transmembrane transporter activity [GO:0005477]; symporter activity [GO:0015293]; cellular response to nutrient levels [GO:0031669]; cellular response to starvation [GO:0009267]; DNA damage response [GO:0006974]; plasma membrane pyruvate transport [GO:0006849]	GO:0005477; GO:0005886; GO:0006849; GO:0006974; GO:0009267; GO:0015293; GO:0031669
TRINITY_DN8517_c2_g1_i1	35	13	0.0174197	0.778129	Upregulated	SA-E vs SA	CAP5A_STAAE	Capsular polysaccharide type 5 biosynthesis protein cap5A	cap5A NWMN_0095		polysaccharide biosynthetic process [GO:0000271]; polysaccharide transport [GO:0015774]	plasma membrane [GO:0005886]	carbohydrate:proton symporter activity [GO:0005351]; protein tyrosine kinase activity [GO:0004713]		cap5A		FUNCTION: Required for the biosynthesis of type 5 capsular polysaccharide (Cap5/CP5). Might act as the chain-length regulator. {ECO:0000269|PubMed:9245821}.	Staphylococcus aureus (strain Newman)	CAP5A_STAAE	UPI00000546EC	plasma membrane [GO:0005886]; carbohydrate:proton symporter activity [GO:0005351]; protein tyrosine kinase activity [GO:0004713]; polysaccharide biosynthetic process [GO:0000271]; polysaccharide transport [GO:0015774]	GO:0000271; GO:0004713; GO:0005351; GO:0005886; GO:0015774
TRINITY_DN11922_c0_g1_i2	536.74	39.55	0.0188282	-0.498955	Downregulated	SA-E vs SA	CAPD_RICCK	UDP-glucose 4-epimerase (EC 5.1.3.2) (Galactowaldenase) (UDP-galactose 4-epimerase)	capD A1E_03815		lipopolysaccharide biosynthetic process [GO:0009103]		UDP-glucose 4-epimerase activity [GO:0003978]		capD	5.1.3.2	FUNCTION: Epimerizes UDP-galactose to UDP-glucose. {ECO:0000250}.	Rickettsia canadensis (strain McKiel)	CAPD_RICCK	UPI00015D7046	UDP-glucose 4-epimerase activity [GO:0003978]; lipopolysaccharide biosynthetic process [GO:0009103]	GO:0003978; GO:0009103
TRINITY_DN50535_c0_g1_i1	13	9	0.0024261	1.26974	Upregulated	SA-E vs SA	CAPP_PSEAE	Phosphoenolpyruvate carboxylase (PEPC) (PEPCase) (EC 4.1.1.31)	ppc PA3687		carbon fixation [GO:0015977]; oxaloacetate metabolic process [GO:0006107]; tricarboxylic acid cycle [GO:0006099]	cytosol [GO:0005829]	magnesium ion binding [GO:0000287]; phosphoenolpyruvate carboxylase activity [GO:0008964]		ppc	4.1.1.31	FUNCTION: Forms oxaloacetate, a four-carbon dicarboxylic acid source for the tricarboxylic acid cycle. {ECO:0000255|HAMAP-Rule:MF_00595}.	Pseudomonas aeruginosa (strain ATCC 15692 / DSM 22644 / CIP 104116 / JCM 14847 / LMG 12228 / 1C / PRS 101 / PAO1)	CAPP_PSEAE	UPI0000126EFA	cytosol [GO:0005829]; magnesium ion binding [GO:0000287]; phosphoenolpyruvate carboxylase activity [GO:0008964]; carbon fixation [GO:0015977]; oxaloacetate metabolic process [GO:0006107]; tricarboxylic acid cycle [GO:0006099]	GO:0000287; GO:0005829; GO:0006099; GO:0006107; GO:0008964; GO:0015977
TRINITY_DN6859_c0_g1_i1	423	121	5.24557e-06	0.57192	Upregulated	SA-E vs SA	CAPSD_BPMR2	Putative major capsid protein (Putative major head protein)	orf47			viral capsid [GO:0019028]			orf47		FUNCTION: Assembles to form an icosahedral capsid. {ECO:0000250|UniProtKB:P49861}.	Staphylococcus phage phiMR25	CAPSD_BPMR2	UPI0001758A89	viral capsid [GO:0019028]	GO:0019028
TRINITY_DN657_c2_g1_i1	3	14	7.44748e-07	2.77627	Upregulated	SA-E vs SA	CBPD_PSEAB	Chitin-binding protein CbpD	cpbD PA14_53250			extracellular region [GO:0005576]	chitin binding [GO:0008061]		cpbD		FUNCTION: Binds but does not hydrolyze chitin. {ECO:0000250|UniProtKB:Q9I589}.	Pseudomonas aeruginosa (strain UCBPP-PA14)	CBPD_PSEAB	UPI000045D059	extracellular region [GO:0005576]; chitin binding [GO:0008061]	GO:0005576; GO:0008061
TRINITY_DN25587_c1_g1_i1	1	1	0.00339444	1.56007	Upregulated	SA-E vs SA	CDC27_RAT	Cell division cycle protein 27 homolog	Cdc27	PATHWAY: Protein modification; protein ubiquitination. {ECO:0000250|UniProtKB:P30260}.	anaphase-promoting complex-dependent catabolic process [GO:0031145]; cell division [GO:0051301]; metaphase/anaphase transition of mitotic cell cycle [GO:0007091]; protein branched polyubiquitination [GO:0141198]; protein K11-linked ubiquitination [GO:0070979]; protein K48-linked ubiquitination [GO:0070936]; protein ubiquitination [GO:0016567]	anaphase-promoting complex [GO:0005680]; centrosome [GO:0005813]; cytoplasm [GO:0005737]; mitotic spindle [GO:0072686]; nucleus [GO:0005634]; spindle [GO:0005819]	protein phosphatase binding [GO:0019903]		Cdc27		FUNCTION: Component of the anaphase promoting complex/cyclosome (APC/C), a cell cycle-regulated E3 ubiquitin ligase that controls progression through mitosis and the G1 phase of the cell cycle. The APC/C complex acts by mediating ubiquitination and subsequent degradation of target proteins: it mainly mediates the formation of 'Lys-11'-linked polyubiquitin chains and, to a lower extent, the format…	Rattus norvegicus (Rat)	CDC27_RAT	UPI0000520BD6	anaphase-promoting complex [GO:0005680]; centrosome [GO:0005813]; cytoplasm [GO:0005737]; mitotic spindle [GO:0072686]; nucleus [GO:0005634]; spindle [GO:0005819]; protein phosphatase binding [GO:0019903]; anaphase-promoting complex-dependent catabolic process [GO:0031145]; cell division [GO:0051301]; metaphase/anaphase transition of mitotic cell cycle [GO:0007091]; protein branched polyubiquitin…	GO:0005634; GO:0005680; GO:0005737; GO:0005813; GO:0005819; GO:0007091; GO:0016567; GO:0019903; GO:0031145; GO:0051301; GO:0070936; GO:0070979; GO:0072686; GO:0141198
TRINITY_DN637_c0_g1_i1	1945	156	0.00738776	-0.432014	Downregulated	SA-E vs SA	CDR_STAA3	Coenzyme A disulfide reductase (CoA-disulfide reductase) (CoADR) (EC 1.8.1.14)	cdr SAUSA300_0873				CoA-disulfide reductase (NADPH) activity [GO:0050451]; flavin adenine dinucleotide binding [GO:0050660]; NADP binding [GO:0050661]; protein disulfide isomerase activity [GO:0003756]		cdr	1.8.1.14	FUNCTION: Catalyzes specifically the NADPH-dependent reduction of coenzyme A disulfide. {ECO:0000255|HAMAP-Rule:MF_01608}.	Staphylococcus aureus (strain USA300)	CDR_STAA3	UPI0000054B23	CoA-disulfide reductase (NADPH) activity [GO:0050451]; flavin adenine dinucleotide binding [GO:0050660]; NADP binding [GO:0050661]; protein disulfide isomerase activity [GO:0003756]	GO:0003756; GO:0050451; GO:0050660; GO:0050661
TRINITY_DN31101_c0_g1_i1	2	2	0.00988045	1.56007	Upregulated	SA-E vs SA	CGB3_HUMAN	Choriogonadotropin subunit beta 3 (Choriogonadotropin subunit beta) (CG-beta) (Chorionic gonadotropin chain beta)	CGB3 CGB; CGB5; CGB8		apoptotic process [GO:0006915]; cell-cell signaling [GO:0007267]; female gamete generation [GO:0007292]; G protein-coupled receptor signaling pathway [GO:0007186]; hormone-mediated signaling pathway [GO:0009755]; signal transduction [GO:0007165]	cytoplasm [GO:0005737]; extracellular region [GO:0005576]; extracellular space [GO:0005615]; pituitary gonadotropin complex [GO:0061696]	hormone activity [GO:0005179]	; ;	CGB3; CGB5; CGB8		FUNCTION: Beta subunit of the human chorionic gonadotropin (hCG). hCG is a complex glycoprotein composed of two glycosylated subunits alpha and beta which are non-covalently associated. The alpha subunit is identical to those in the pituitary gonadotropin hormones (LH, FSH and TSH). The beta subunits are distinct in each of the hormones and confer receptor and biological specificity. Has an essen…	Homo sapiens (Human)	CGB3_HUMAN	UPI0000035497	cytoplasm [GO:0005737]; extracellular region [GO:0005576]; extracellular space [GO:0005615]; pituitary gonadotropin complex [GO:0061696]; hormone activity [GO:0005179]; apoptotic process [GO:0006915]; cell-cell signaling [GO:0007267]; female gamete generation [GO:0007292]; G protein-coupled receptor signaling pathway [GO:0007186]; hormone-mediated signaling pathway [GO:0009755]; signal transducti…	GO:0005179; GO:0005576; GO:0005615; GO:0005737; GO:0006915; GO:0007165; GO:0007186; GO:0007267; GO:0007292; GO:0009755; GO:0061696
TRINITY_DN2356_c0_g4_i1	99	3	0.00843262	-1.20049	Downregulated	SA-E vs SA	CH60_STAAB	Chaperonin GroEL (EC 5.6.1.7) (60 kDa chaperonin) (Chaperonin-60) (Cpn60)	groEL groL SAB1913c		protein refolding [GO:0042026]	cytoplasm [GO:0005737]	ATP binding [GO:0005524]; ATP-dependent protein folding chaperone [GO:0140662]; isomerase activity [GO:0016853]; unfolded protein binding [GO:0051082]		groEL	5.6.1.7	FUNCTION: Together with its co-chaperonin GroES, plays an essential role in assisting protein folding. The GroEL-GroES system forms a nano-cage that allows encapsulation of the non-native substrate proteins and provides a physical environment optimized to promote and accelerate protein folding. {ECO:0000255|HAMAP-Rule:MF_00600}.	Staphylococcus aureus (strain bovine RF122 / ET3-1)	CH60_STAAB	UPI00005FE69B	cytoplasm [GO:0005737]; ATP binding [GO:0005524]; ATP-dependent protein folding chaperone [GO:0140662]; isomerase activity [GO:0016853]; unfolded protein binding [GO:0051082]; protein refolding [GO:0042026]	GO:0005524; GO:0005737; GO:0016853; GO:0042026; GO:0051082; GO:0140662
TRINITY_DN2356_c0_g3_i2	1905.31	155	0.00996208	-0.420814	Downregulated	SA-E vs SA	CH60_STAAC	Chaperonin GroEL (EC 5.6.1.7) (60 kDa chaperonin) (Chaperonin-60) (Cpn60)	groEL groL SACOL2016		protein refolding [GO:0042026]	cytoplasm [GO:0005737]	ATP binding [GO:0005524]; ATP-dependent protein folding chaperone [GO:0140662]; isomerase activity [GO:0016853]; unfolded protein binding [GO:0051082]		groEL	5.6.1.7	FUNCTION: Together with its co-chaperonin GroES, plays an essential role in assisting protein folding. The GroEL-GroES system forms a nano-cage that allows encapsulation of the non-native substrate proteins and provides a physical environment optimized to promote and accelerate protein folding. {ECO:0000255|HAMAP-Rule:MF_00600}.	Staphylococcus aureus (strain COL)	CH60_STAAC	UPI00004B5C68	cytoplasm [GO:0005737]; ATP binding [GO:0005524]; ATP-dependent protein folding chaperone [GO:0140662]; isomerase activity [GO:0016853]; unfolded protein binding [GO:0051082]; protein refolding [GO:0042026]	GO:0005524; GO:0005737; GO:0016853; GO:0042026; GO:0051082; GO:0140662
TRINITY_DN3220_c0_g2_i2	23082.6	1569	2.91753e-05	-0.562662	Downregulated	SA-E vs SA	CIDA_STAAS	Holin-like protein CidA	cidA SAS2427		cytolysis [GO:0019835]; killing of cells of another organism [GO:0031640]; programmed cell death [GO:0012501]	plasma membrane [GO:0005886]			cidA		FUNCTION: Increases the activity of extracellular murein hydrolases possibly by mediating their export via hole formation. Inhibited by the antiholin-like proteins LrgAB. In an unstressed cell, the LrgAB products probably inhibit the function of the CidAB proteins. When a cell is stressed by the addition of antibiotics or by other factors in the environment, the CidAB proteins possibly oligomeriz…	Staphylococcus aureus (strain MSSA476)	CIDA_STAAS	UPI00000548B4	plasma membrane [GO:0005886]; cytolysis [GO:0019835]; killing of cells of another organism [GO:0031640]; programmed cell death [GO:0012501]	GO:0005886; GO:0012501; GO:0019835; GO:0031640
TRINITY_DN6688_c0_g1_i4	176.95	10	0.0221058	-0.70844	Downregulated	SA-E vs SA	CLFA_STAA8	Clumping factor A (Fibrinogen receptor A) (Fibrinogen-binding protein A)	clfA SAOUHSC_00812		aggregation of unicellular organisms [GO:0098630]; cell adhesion [GO:0007155]	extracellular region [GO:0005576]	fibrinogen binding [GO:0070051]; fibronectin binding [GO:0001968]		clfA		FUNCTION: Cell surface-associated protein implicated in virulence. Promotes bacterial attachment exclusively to the gamma-chain of human fibrinogen. Induces formation of bacterial clumps, which diminish the ability of group IIA phospholipase A2 to cause bacterial phospholipid hydrolysis and killing. Significantly decreases macrophage phagocytosis possibly thanks to the clumps, clumped bacteria be…	Staphylococcus aureus (strain NCTC 8325 / PS 47)	CLFA_STAA8	UPI0000054758	extracellular region [GO:0005576]; fibrinogen binding [GO:0070051]; fibronectin binding [GO:0001968]; aggregation of unicellular organisms [GO:0098630]; cell adhesion [GO:0007155]	GO:0001968; GO:0005576; GO:0007155; GO:0070051; GO:0098630
TRINITY_DN8574_c0_g1_i1	142	4	0.00106592	-1.25814	Downregulated	SA-E vs SA	CLFA_STAAC	Clumping factor A (Fibrinogen receptor A) (Fibrinogen-binding protein A)	clfA SACOL0856		cell adhesion [GO:0007155]	extracellular region [GO:0005576]			clfA		FUNCTION: Cell surface-associated protein implicated in virulence. Promotes bacterial attachment exclusively to the gamma-chain of human fibrinogen. Induces formation of bacterial clumps (By similarity). {ECO:0000250}.	Staphylococcus aureus (strain COL)	CLFA_STAAC	UPI000005226F	extracellular region [GO:0005576]; cell adhesion [GO:0007155]	GO:0005576; GO:0007155
TRINITY_DN112_c0_g1_i1	1893.34	84.66	8.80631e-09	-0.893324	Downregulated	SA-E vs SA	CLFA_STAAE	Clumping factor A (Fibrinogen receptor A) (Fibrinogen-binding protein A)	clfA NWMN_0756		cell adhesion [GO:0007155]	extracellular region [GO:0005576]			clfA		FUNCTION: Cell surface-associated protein implicated in virulence. Promotes bacterial attachment exclusively to the gamma-chain of human fibrinogen. Induces formation of bacterial clumps, which diminish the ability of group IIA phospholipase A2 to cause bacterial phospholipid hydrolysis and killing. Significantly decreases macrophage phagocytosis possibly thanks to the clumps, clumped bacteria be…	Staphylococcus aureus (strain Newman)	CLFA_STAAE	UPI00000BB5DF	extracellular region [GO:0005576]; cell adhesion [GO:0007155]	GO:0005576; GO:0007155
TRINITY_DN112_c0_g1_i9	24.68	35.67	3.61333e-13	1.85086	Upregulated	SA-E vs SA	CLFA_STAAM	Clumping factor A (Fibrinogen receptor A) (Fibrinogen-binding protein A)	clfA fnb SAV0811		cell adhesion [GO:0007155]	extracellular region [GO:0005576]			clfA		FUNCTION: Cell surface-associated protein implicated in virulence. Promotes bacterial attachment exclusively to the gamma-chain of human fibrinogen. Induces formation of bacterial clumps (By similarity). {ECO:0000250}.	Staphylococcus aureus (strain Mu50 / ATCC 700699)	CLFA_STAAM	UPI00000CAE7F	extracellular region [GO:0005576]; cell adhesion [GO:0007155]	GO:0005576; GO:0007155
TRINITY_DN1745_c0_g1_i6	238	63	0.000437539	0.51069	Upregulated	SA-E vs SA	CLPP_STAAR	ATP-dependent Clp protease proteolytic subunit (EC 3.4.21.92) (Endopeptidase Clp)	clpP SAR0823		protein quality control for misfolded or incompletely synthesized proteins [GO:0006515]	cytoplasm [GO:0005737]; endopeptidase Clp complex [GO:0009368]	ATP-dependent peptidase activity [GO:0004176]; ATPase binding [GO:0051117]; serine-type endopeptidase activity [GO:0004252]		clpP	3.4.21.92	FUNCTION: Cleaves peptides in various proteins in a process that requires ATP hydrolysis. Has a chymotrypsin-like activity. Plays a major role in the degradation of misfolded proteins. {ECO:0000255|HAMAP-Rule:MF_00444}.	Staphylococcus aureus (strain MRSA252)	CLPP_STAAR	UPI000005476D	cytoplasm [GO:0005737]; endopeptidase Clp complex [GO:0009368]; ATP-dependent peptidase activity [GO:0004176]; ATPase binding [GO:0051117]; serine-type endopeptidase activity [GO:0004252]; protein quality control for misfolded or incompletely synthesized proteins [GO:0006515]	GO:0004176; GO:0004252; GO:0005737; GO:0006515; GO:0009368; GO:0051117
TRINITY_DN173_c0_g2_i1	4	4	9.22193e-11	1.56007	Upregulated	SA-E vs SA	CLPS_PSEAB	ATP-dependent Clp protease adapter protein ClpS	clpS PA14_30210		protein catabolic process [GO:0030163]; proteolysis [GO:0006508]				clpS		FUNCTION: Involved in the modulation of the specificity of the ClpAP-mediated ATP-dependent protein degradation. {ECO:0000255|HAMAP-Rule:MF_00302}.	Pseudomonas aeruginosa (strain UCBPP-PA14)	CLPS_PSEAB	UPI000013BE86	protein catabolic process [GO:0030163]; proteolysis [GO:0006508]	GO:0006508; GO:0030163
TRINITY_DN612_c0_g3_i1	180	6	0.000715667	-1.12524	Downregulated	SA-E vs SA	CLS2_STAAR	Cardiolipin synthase 2 (CL synthase 2) (EC 2.7.8.-)	cls2 SAR2177		cardiolipin biosynthetic process [GO:0032049]	plasma membrane [GO:0005886]	cardiolipin synthase activity [GO:0008808]		cls2	2.7.8.-	FUNCTION: Catalyzes the reversible phosphatidyl group transfer from one phosphatidylglycerol molecule to another to form cardiolipin (CL) (diphosphatidylglycerol) and glycerol. {ECO:0000255|HAMAP-Rule:MF_01916}.	Staphylococcus aureus (strain MRSA252)	CLS2_STAAR	UPI00003B1854	plasma membrane [GO:0005886]; cardiolipin synthase activity [GO:0008808]; cardiolipin biosynthetic process [GO:0032049]	GO:0005886; GO:0008808; GO:0032049
TRINITY_DN11549_c0_g1_i1	476	11	6.38187e-09	-1.41446	Downregulated	SA-E vs SA	CNTA_STAA8	Metal-staphylopine-binding protein CntA	cntA opp-1A opp1A SAOUHSC_02767		cobalt ion transport [GO:0006824]; nickel cation transport [GO:0015675]; peptide transport [GO:0015833]; zinc ion transport [GO:0006829]	ATP-binding cassette (ABC) transporter complex [GO:0043190]; outer membrane-bounded periplasmic space [GO:0030288]	heme binding [GO:0020037]; nickel cation binding [GO:0016151]; peptide transmembrane transporter activity [GO:1904680]		cntA		FUNCTION: Part of the ABC transporter complex CntABCDF (Opp1) involved in the uptake of metal in complex with the metallophore staphylopine (StP). Involved in the import of divalent metals ions such as nickel, cobalt and zinc. Binds the metal via the metallophore StP, and transfers the StP-metal complex to the membrane-bound permease (PubMed:23279021, PubMed:29581261). Binds one molecule of StP/m…	Staphylococcus aureus (strain NCTC 8325 / PS 47)	CNTA_STAA8	UPI0000054864	ATP-binding cassette (ABC) transporter complex [GO:0043190]; outer membrane-bounded periplasmic space [GO:0030288]; heme binding [GO:0020037]; nickel cation binding [GO:0016151]; peptide transmembrane transporter activity [GO:1904680]; cobalt ion transport [GO:0006824]; nickel cation transport [GO:0015675]; peptide transport [GO:0015833]; zinc ion transport [GO:0006829]	GO:0006824; GO:0006829; GO:0015675; GO:0015833; GO:0016151; GO:0020037; GO:0030288; GO:0043190; GO:1904680
TRINITY_DN11549_c0_g3_i1	256	5	1.96508e-06	-1.54727	Downregulated	SA-E vs SA	CNTD_STAA8	Metal-staphylopine import system ATP-binding protein CntD (EC 7.2.2.-)	cntD opp1D SAOUHSC_02764		cobalt ion transport [GO:0006824]; nickel cation transport [GO:0015675]; transmembrane transport [GO:0055085]; zinc ion transport [GO:0006829]	plasma membrane [GO:0005886]	ATP binding [GO:0005524]; ATP hydrolysis activity [GO:0016887]; transmembrane transporter activity [GO:0022857]		cntD	7.2.2.-	FUNCTION: Part of the ABC transporter complex CntABCDF (Opp1) involved in the uptake of metal in complex with the metallophore staphylopine (StP). Involved in the import of divalent metals ions such as nickel, cobalt and zinc. Probably responsible for energy coupling to the transport system (PubMed:23279021, PubMed:29581261). Plays a major role in nickel/cobalt import in zinc-depleted conditions.…	Staphylococcus aureus (strain NCTC 8325 / PS 47)	CNTD_STAA8	UPI0000054861	plasma membrane [GO:0005886]; ATP binding [GO:0005524]; ATP hydrolysis activity [GO:0016887]; transmembrane transporter activity [GO:0022857]; cobalt ion transport [GO:0006824]; nickel cation transport [GO:0015675]; transmembrane transport [GO:0055085]; zinc ion transport [GO:0006829]	GO:0005524; GO:0005886; GO:0006824; GO:0006829; GO:0015675; GO:0016887; GO:0022857; GO:0055085
TRINITY_DN11549_c0_g2_i3	2749.5	248	0.0396078	-0.339312	Downregulated	SA-E vs SA	CNTD_STAAM	Metal-staphylopine import system ATP-binding protein CntD (EC 7.2.2.-)	cntD SAV2464		cobalt ion transport [GO:0006824]; copper ion transport [GO:0006825]; iron ion transport [GO:0006826]; nickel cation transport [GO:0015675]; zinc ion transport [GO:0006829]	plasma membrane [GO:0005886]	ATP binding [GO:0005524]; ATP hydrolysis activity [GO:0016887]		cntD	7.2.2.-	FUNCTION: Part of the ABC transporter complex CntABCDF (Opp1) involved in the uptake of metal in complex with the metallophore staphylopine (StP). May be involved in the import of a large array of divalent metals ions such as nickel, cobalt, zinc, copper and iron. Probably responsible for energy coupling to the transport system. {ECO:0000269|PubMed:27230378}.	Staphylococcus aureus (strain Mu50 / ATCC 700699)	CNTD_STAAM	UPI00000CAC99	plasma membrane [GO:0005886]; ATP binding [GO:0005524]; ATP hydrolysis activity [GO:0016887]; cobalt ion transport [GO:0006824]; copper ion transport [GO:0006825]; iron ion transport [GO:0006826]; nickel cation transport [GO:0015675]; zinc ion transport [GO:0006829]	GO:0005524; GO:0005886; GO:0006824; GO:0006825; GO:0006826; GO:0006829; GO:0015675; GO:0016887
TRINITY_DN1886_c0_g1_i1	554	30	0.000307862	-0.742141	Downregulated	SA-E vs SA	COABC_BACSU	Coenzyme A biosynthesis bifunctional protein CoaBC (DNA/pantothenate metabolism flavoprotein) (Phosphopantothenoylcysteine synthetase/decarboxylase) (PPCS-PPCDC) [Includes: Phosphopantothenoylcysteine decarboxylase (PPC decarboxylase) (PPC-DC) (EC 4.1.1.36) (CoaC); Phosphopantothenate--cysteine ligase (EC 6.3.2.5) (CoaB) (Phosphopantothenoylcysteine synthetase) (PPC synthetase) (PPC-S)]	coaBC yloI BSU15700	PATHWAY: Cofactor biosynthesis; coenzyme A biosynthesis; CoA from (R)-pantothenate: step 2/5. {ECO:0000255|HAMAP-Rule:MF_02225}.; PATHWAY: Cofactor biosynthesis; coenzyme A biosynthesis; CoA from (R)-pantothenate: step 3/5. {ECO:0000255|HAMAP-Rule:MF_02225}.	coenzyme A biosynthetic process [GO:0015937]; pantothenate catabolic process [GO:0015941]	phosphopantothenoylcysteine decarboxylase complex [GO:0071513]	FMN binding [GO:0010181]; metal ion binding [GO:0046872]; phosphopantothenate--cysteine ligase activity [GO:0004632]; phosphopantothenoylcysteine decarboxylase activity [GO:0004633]		coaBC	4.1.1.36; 6.3.2.5	FUNCTION: Catalyzes two sequential steps in the biosynthesis of coenzyme A. In the first step cysteine is conjugated to 4'-phosphopantothenate to form 4-phosphopantothenoylcysteine. In the second step the latter compound is decarboxylated to form 4'-phosphopantotheine. {ECO:0000255|HAMAP-Rule:MF_02225}.	Bacillus subtilis (strain 168)	COABC_BACSU	UPI00000603AC	phosphopantothenoylcysteine decarboxylase complex [GO:0071513]; FMN binding [GO:0010181]; metal ion binding [GO:0046872]; phosphopantothenate--cysteine ligase activity [GO:0004632]; phosphopantothenoylcysteine decarboxylase activity [GO:0004633]; coenzyme A biosynthetic process [GO:0015937]; pantothenate catabolic process [GO:0015941]	GO:0004632; GO:0004633; GO:0010181; GO:0015937; GO:0015941; GO:0046872; GO:0071513
TRINITY_DN1998_c0_g1_i1	219	11	0.00582604	-0.80152	Downregulated	SA-E vs SA	COAE_STAAS	Dephospho-CoA kinase (EC 2.7.1.24) (Dephosphocoenzyme A kinase)	coaE SAS1616	PATHWAY: Cofactor biosynthesis; coenzyme A biosynthesis; CoA from (R)-pantothenate: step 5/5. {ECO:0000255|HAMAP-Rule:MF_00376}.	coenzyme A biosynthetic process [GO:0015937]	cytoplasm [GO:0005737]	ATP binding [GO:0005524]; dephospho-CoA kinase activity [GO:0004140]		coaE	2.7.1.24	FUNCTION: Catalyzes the phosphorylation of the 3'-hydroxyl group of dephosphocoenzyme A to form coenzyme A. {ECO:0000255|HAMAP-Rule:MF_00376}.	Staphylococcus aureus (strain MSSA476)	COAE_STAAS	UPI0000127CF3	cytoplasm [GO:0005737]; ATP binding [GO:0005524]; dephospho-CoA kinase activity [GO:0004140]; coenzyme A biosynthetic process [GO:0015937]	GO:0004140; GO:0005524; GO:0005737; GO:0015937
TRINITY_DN35917_c0_g1_i1	662	44	0.00267023	-0.580376	Downregulated	SA-E vs SA	COAW_STAAM	Type II pantothenate kinase (EC 2.7.1.33) (PanK-II) (Pantothenic acid kinase)	coaW SAV2130	PATHWAY: Cofactor biosynthesis; coenzyme A biosynthesis; CoA from (R)-pantothenate: step 1/5. {ECO:0000255|HAMAP-Rule:MF_01273}.	coenzyme A biosynthetic process [GO:0015937]	cytosol [GO:0005829]	ATP binding [GO:0005524]; pantothenate kinase activity [GO:0004594]		coaW	2.7.1.33	FUNCTION: Catalyzes the phosphorylation of pantothenate (Pan), the first step in CoA biosynthesis. {ECO:0000255|HAMAP-Rule:MF_01273}.	Staphylococcus aureus (strain Mu50 / ATCC 700699)	COAW_STAAM	UPI00000CAA65	cytosol [GO:0005829]; ATP binding [GO:0005524]; pantothenate kinase activity [GO:0004594]; coenzyme A biosynthetic process [GO:0015937]	GO:0004594; GO:0005524; GO:0005829; GO:0015937
TRINITY_DN13_c1_g4_i1	18	12	0.000421961	1.23994	Upregulated	SA-E vs SA	COBH_PSEAE	Precorrin-8X methylmutase (EC 5.4.99.61) (HBA synthase) (Precorrin isomerase)	cobH PA2905	PATHWAY: Cofactor biosynthesis; adenosylcobalamin biosynthesis; cob(II)yrinate a,c-diamide from precorrin-2 (aerobic route): step 8/10.	cobalamin biosynthetic process [GO:0009236]		precorrin-8X methylmutase activity [GO:0016993]		cobH	5.4.99.61	FUNCTION: Catalyzes the conversion of precorrin-8X to hydrogenobyrinate. {ECO:0000250}.	Pseudomonas aeruginosa (strain ATCC 15692 / DSM 22644 / CIP 104116 / JCM 14847 / LMG 12228 / 1C / PRS 101 / PAO1)	COBH_PSEAE	UPI00000C5874	precorrin-8X methylmutase activity [GO:0016993]; cobalamin biosynthetic process [GO:0009236]	GO:0009236; GO:0016993
TRINITY_DN8526_c0_g1_i1	177	50	0.000455892	0.562016	Upregulated	SA-E vs SA	COMEB_BACSU	ComE operon protein 2 (EC 3.5.-.-)	comEB comE2 BSU25580		cytidine deamination [GO:0009972]	cytoplasm [GO:0005737]	dCMP deaminase activity [GO:0004132]; zinc ion binding [GO:0008270]		comEB	3.5.-.-	FUNCTION: Dispensable for transformability.	Bacillus subtilis (strain 168)	COMEB_BACSU	UPI0000060763	cytoplasm [GO:0005737]; dCMP deaminase activity [GO:0004132]; zinc ion binding [GO:0008270]; cytidine deamination [GO:0009972]	GO:0004132; GO:0005737; GO:0008270; GO:0009972
TRINITY_DN424_c0_g1_i3	1780.44	76.21	2.69799e-09	-0.927801	Downregulated	SA-E vs SA	COXX_STAAM	Protoheme IX farnesyltransferase (EC 2.5.1.141) (Heme B farnesyltransferase) (Heme O synthase)	ctaB SAV1116	PATHWAY: Porphyrin-containing compound metabolism; heme O biosynthesis; heme O from protoheme: step 1/1. {ECO:0000255|HAMAP-Rule:MF_00154}.	heme O biosynthetic process [GO:0048034]	plasma membrane [GO:0005886]	protoheme IX farnesyltransferase activity [GO:0008495]		ctaB	2.5.1.141	FUNCTION: Converts heme B (protoheme IX) to heme O by substitution of the vinyl group on carbon 2 of heme B porphyrin ring with a hydroxyethyl farnesyl side group. {ECO:0000255|HAMAP-Rule:MF_00154}.	Staphylococcus aureus (strain Mu50 / ATCC 700699)	COXX_STAAM	UPI0000054B37	plasma membrane [GO:0005886]; protoheme IX farnesyltransferase activity [GO:0008495]; heme O biosynthetic process [GO:0048034]	GO:0005886; GO:0008495; GO:0048034
TRINITY_DN946_c1_g2_i1	33	14	0.00510013	0.883094	Upregulated	SA-E vs SA	CPFC_STAA8	Coproporphyrin III ferrochelatase (EC 4.99.1.9)	cpfC hemH SAOUHSC_01961	PATHWAY: Porphyrin-containing compound metabolism; protoheme biosynthesis. {ECO:0000255|HAMAP-Rule:MF_00323, ECO:0000269|PubMed:25908396}.	heme biosynthetic process [GO:0006783]	cytoplasm [GO:0005737]	ferrochelatase activity [GO:0004325]; metal ion binding [GO:0046872]		cpfC	4.99.1.9	FUNCTION: Involved in coproporphyrin-dependent heme b biosynthesis (PubMed:25908396). Catalyzes the insertion of ferrous iron into coproporphyrin III to form Fe-coproporphyrin III (PubMed:25908396). It can also insert iron into protoporphyrin IX, but it has a much stronger preference for coproprophyrin III as the substrate (PubMed:25908396). {ECO:0000269|PubMed:25908396}.	Staphylococcus aureus (strain NCTC 8325 / PS 47)	CPFC_STAA8	UPI0000054322	cytoplasm [GO:0005737]; ferrochelatase activity [GO:0004325]; metal ion binding [GO:0046872]; heme biosynthetic process [GO:0006783]	GO:0004325; GO:0005737; GO:0006783; GO:0046872
TRINITY_DN27707_c0_g1_i2	2	7	0.0386722	2.54914	Upregulated	SA-E vs SA	CPXP_SHIFL	Periplasmic protein CpxP	cpxP SF3992 S3755			outer membrane-bounded periplasmic space [GO:0030288]	unfolded protein binding [GO:0051082]		cpxP		FUNCTION: Acts as an accessory protein in the Cpx two-component envelope stress response system. Binds the periplasmic domain of sensor histidine kinase CpxA, inhibiting induction of the envelope stress response in the absence of inducer. Aids in combating extracytoplasmic protein-mediated toxicity. {ECO:0000250|UniProtKB:P0AE85}.	Shigella flexneri	CPXP_SHIFL	UPI000012833C	outer membrane-bounded periplasmic space [GO:0030288]; unfolded protein binding [GO:0051082]	GO:0030288; GO:0051082
TRINITY_DN64_c0_g1_i1	617	49	0.0306661	-0.43982	Downregulated	SA-E vs SA	CRTM_STAAW	4,4'-diapophytoene synthase (DAP synthase) (EC 2.5.1.96) (C30 carotenoid synthase) (Dehydrosqualene synthase)	crtM MW2483	PATHWAY: Carotenoid biosynthesis; staphyloxanthin biosynthesis; staphyloxanthin from farnesyl diphosphate: step 1/5. {ECO:0000250|UniProtKB:Q2FV59}.	carotenoid biosynthetic process [GO:0016117]		farnesyltranstransferase activity [GO:0004311]; metal ion binding [GO:0046872]; squalene synthase [NAD(P)H] activity [GO:0051996]		crtM	2.5.1.96	FUNCTION: Involved in the biosynthesis of the yellow-orange carotenoid staphyloxanthin, which plays a role in the virulence via its protective function against oxidative stress. Catalyzes the head-to-head condensation of two molecules of farnesyl diphosphate (FPP) into the colorless C(30) carotenoid 4,4'-diapophytoene (dehydrosqualene). {ECO:0000250|UniProtKB:Q2FV59}.	Staphylococcus aureus (strain MW2)	CRTM_STAAW	UPI00000DA00F	farnesyltranstransferase activity [GO:0004311]; metal ion binding [GO:0046872]; squalene synthase [NAD(P)H] activity [GO:0051996]; carotenoid biosynthetic process [GO:0016117]	GO:0004311; GO:0016117; GO:0046872; GO:0051996
TRINITY_DN4717_c0_g1_i1	95	4	0.0340935	-0.940796	Downregulated	SA-E vs SA	CRTP_STAAS	4,4'-diaponeurosporene oxygenase (EC 1.14.99.-) (4,4'-diaponeurosporene oxidase) (Carotenoid oxidase)	crtP SAS2450	PATHWAY: Carotenoid biosynthesis; staphyloxanthin biosynthesis; staphyloxanthin from farnesyl diphosphate: step 3/5. {ECO:0000250|UniProtKB:Q2FV57}.	carotenoid biosynthetic process [GO:0016117]		oxidoreductase activity [GO:0016491]		crtP	1.14.99.-	FUNCTION: Involved in the biosynthesis of the yellow-orange carotenoid staphyloxanthin, which plays a role in the virulence via its protective function against oxidative stress. Catalyzes the oxidation of the terminal methyl side group of 4,4'-diaponeurosporene to form 4,4'-diaponeurosporen-4-al. {ECO:0000250|UniProtKB:Q2FV57}.	Staphylococcus aureus (strain MSSA476)	CRTP_STAAS	UPI00003B1B45	oxidoreductase activity [GO:0016491]; carotenoid biosynthetic process [GO:0016117]	GO:0016117; GO:0016491
TRINITY_DN712_c1_g1_i10	6865.5	1320.86	0.00278449	0.258763	Upregulated	SA-E vs SA	CSBB_BACSU	Putative glycosyltransferase CsbB (EC 2.4.-.-)	csbB yfhN BSU08600			plasma membrane [GO:0005886]	glycosyltransferase activity [GO:0016757]		csbB	2.4.-.-		Bacillus subtilis (strain 168)	CSBB_BACSU	UPI00000600F2	plasma membrane [GO:0005886]; glycosyltransferase activity [GO:0016757]	GO:0005886; GO:0016757
TRINITY_DN18182_c1_g1_i2	1	2	0.0161862	2.10732	Upregulated	SA-E vs SA	CT47A_HUMAN	Cancer/testis antigen 47A (Cancer/testis antigen 47) (CT47)	CT47A1 CT47.1; CT47A2 CT47.2; CT47A3 CT47.3; CT47A4 CT47.4; CT47A5 CT47.5; CT47A6 CT47.6; CT47A7 CT47.7; CT47A8 CT47.8; CT47A9 CT47.9; CT47A10 CT47.10; CT47A11 CT47.11; CT47A12 CT47.12					; ; ; ; ; ; ; ; ; ; ;	CT47A1; CT47A2; CT47A3; CT47A4; CT47A5; CT47A6; CT47A7; CT47A8; CT47A9; CT47A10; CT47A11; CT47A12			Homo sapiens (Human)	CT47A_HUMAN	UPI000013EEB5
TRINITY_DN12180_c0_g1_i1	3	3	0.0228436	1.56007	Upregulated	SA-E vs SA	CTGE8_HUMAN	cTAGE family member 8 (Protein cTAGE-8)	CTAGE8		endoplasmic reticulum to Golgi vesicle-mediated transport [GO:0006888]; protein secretion [GO:0009306]; vesicle cargo loading [GO:0035459]	endoplasmic reticulum exit site [GO:0070971]; endoplasmic reticulum membrane [GO:0005789]			CTAGE8			Homo sapiens (Human)	CTGE8_HUMAN	UPI00001B64FF	endoplasmic reticulum exit site [GO:0070971]; endoplasmic reticulum membrane [GO:0005789]; endoplasmic reticulum to Golgi vesicle-mediated transport [GO:0006888]; protein secretion [GO:0009306]; vesicle cargo loading [GO:0035459]	GO:0005789; GO:0006888; GO:0009306; GO:0035459; GO:0070971
TRINITY_DN2_c0_g1_i1	6185.57	571.67	0.0450852	-0.320101	Downregulated	SA-E vs SA	CTSR_STAAM	Transcriptional regulator CtsR	ctsR SAV0522		regulation of DNA-templated transcription [GO:0006355]		DNA binding [GO:0003677]		ctsR		FUNCTION: Negative regulator of clpC, clpB and clpP transcription by binding directly and specifically to their promoter region. {ECO:0000250}.	Staphylococcus aureus (strain Mu50 / ATCC 700699)	CTSR_STAAM	UPI00000D76B4	DNA binding [GO:0003677]; regulation of DNA-templated transcription [GO:0006355]	GO:0003677; GO:0006355
TRINITY_DN180_c0_g2_i1	445	25	0.00104087	-0.713111	Downregulated	SA-E vs SA	CYCA_ECO57	D-serine/D-alanine/glycine transporter	cycA Z5819 ECs5186		amino acid transport [GO:0006865]	plasma membrane [GO:0005886]	symporter activity [GO:0015293]		cycA		FUNCTION: Permease that is involved in the transport across the cytoplasmic membrane of D-alanine, D-serine and glycine. {ECO:0000250|UniProtKB:A0A0H2VDI7}.	Escherichia coli O157:H7	CYCA_ECO57	UPI0000128B71	plasma membrane [GO:0005886]; symporter activity [GO:0015293]; amino acid transport [GO:0006865]	GO:0005886; GO:0006865; GO:0015293
TRINITY_DN31369_c0_g1_i1	81	3	0.0387935	-1.04205	Downregulated	SA-E vs SA	DAGK_STAAR	Diacylglycerol kinase (DAG kinase) (DAGK) (EC 2.7.1.107)	dagK dgkB SAR1989		phospholipid biosynthetic process [GO:0008654]	plasma membrane [GO:0005886]	ATP binding [GO:0005524]; ATP-dependent diacylglycerol kinase activity [GO:0004143]; identical protein binding [GO:0042802]; metal ion binding [GO:0046872]		dagK	2.7.1.107	FUNCTION: Catalyzes the phosphorylation of diacylglycerol (DAG) into phosphatidic acid. Is a key enzyme involved in the production of lipoteichoic acid by reintroducing DAG formed from the breakdown of membrane phospholipids into the phosphatidylglycerol biosynthetic pathway. {ECO:0000269|PubMed:17535816}.	Staphylococcus aureus (strain MRSA252)	DAGK_STAAR	UPI00003B17E7	plasma membrane [GO:0005886]; ATP binding [GO:0005524]; ATP-dependent diacylglycerol kinase activity [GO:0004143]; identical protein binding [GO:0042802]; metal ion binding [GO:0046872]; phospholipid biosynthetic process [GO:0008654]	GO:0004143; GO:0005524; GO:0005886; GO:0008654; GO:0042802; GO:0046872
TRINITY_DN48_c0_g4_i1	2	23	1.42164e-10	3.48834	Upregulated	SA-E vs SA	DCD_PSEAE	dCTP deaminase (EC 3.5.4.13) (Deoxycytidine triphosphate deaminase)	dcd PA3480	PATHWAY: Pyrimidine metabolism; dUMP biosynthesis; dUMP from dCTP (dUTP route): step 1/2. {ECO:0000255|HAMAP-Rule:MF_00146}.	dUMP biosynthetic process [GO:0006226]; dUTP biosynthetic process [GO:0006229]; nucleobase-containing small molecule interconversion [GO:0015949]		dCTP deaminase activity [GO:0008829]; nucleotide binding [GO:0000166]		dcd	3.5.4.13	FUNCTION: Catalyzes the deamination of dCTP to dUTP. {ECO:0000255|HAMAP-Rule:MF_00146}.	Pseudomonas aeruginosa (strain ATCC 15692 / DSM 22644 / CIP 104116 / JCM 14847 / LMG 12228 / 1C / PRS 101 / PAO1)	DCD_PSEAE	UPI0000128F91	dCTP deaminase activity [GO:0008829]; nucleotide binding [GO:0000166]; dUMP biosynthetic process [GO:0006226]; dUTP biosynthetic process [GO:0006229]; nucleobase-containing small molecule interconversion [GO:0015949]	GO:0000166; GO:0006226; GO:0006229; GO:0008829; GO:0015949
TRINITY_DN52977_c0_g1_i1	2	2	0.0270089	1.56007	Upregulated	SA-E vs SA	DCOS_ECOLI	Inducible ornithine decarboxylase (EC 4.1.1.17)	speF b0693 JW0680	PATHWAY: Amine and polyamine biosynthesis; putrescine biosynthesis via L-ornithine pathway; putrescine from L-ornithine: step 1/1.	cellular response to acidic pH [GO:0071468]; putrescine biosynthetic process from ornithine [GO:0033387]; spermidine biosynthetic process [GO:0008295]	cytosol [GO:0005829]	ornithine decarboxylase activity [GO:0004586]; protein homodimerization activity [GO:0042803]; pyridoxal phosphate binding [GO:0030170]		speF	4.1.1.17	FUNCTION: The first enzyme leading to putrescine and thus polyamine synthesis. {ECO:0000305}.	Escherichia coli (strain K12)	DCOS_ECOLI	UPI0000128FF8	cytosol [GO:0005829]; ornithine decarboxylase activity [GO:0004586]; protein homodimerization activity [GO:0042803]; pyridoxal phosphate binding [GO:0030170]; cellular response to acidic pH [GO:0071468]; putrescine biosynthetic process from ornithine [GO:0033387]; spermidine biosynthetic process [GO:0008295]	GO:0004586; GO:0005829; GO:0008295; GO:0030170; GO:0033387; GO:0042803; GO:0071468
TRINITY_DN5517_c0_g1_i1	19	34	8.00461e-14	2.0195	Upregulated	SA-E vs SA	DEAD_ECO57	ATP-dependent RNA helicase DeaD (EC 3.6.4.13) (Cold-shock DEAD box protein A)	deaD csdA Z4523 ECs4043		cellular response to cold [GO:0070417]; ribosomal large subunit assembly [GO:0000027]; RNA catabolic process [GO:0006401]	cytosol [GO:0005829]; ribosome [GO:0005840]	ATP binding [GO:0005524]; ATP hydrolysis activity [GO:0016887]; ATP-dependent H2AZ histone chaperone activity [GO:0140849]; ATP-dependent H3-H4 histone complex chaperone activity [GO:0140665]; chromatin extrusion motor activity [GO:0140584]; cohesin loader activity [GO:0061775]; DNA clamp loader activity [GO:0003689]; RNA helicase activity [GO:0003724]; RNA strand annealing activity [GO:0033592]		deaD	3.6.4.13	FUNCTION: DEAD-box RNA helicase involved in various cellular processes at low temperature, including ribosome biogenesis, mRNA degradation and translation initiation. {ECO:0000255|HAMAP-Rule:MF_00964}.	Escherichia coli O157:H7	DEAD_ECO57	UPI000022645C	cytosol [GO:0005829]; ribosome [GO:0005840]; ATP binding [GO:0005524]; ATP hydrolysis activity [GO:0016887]; ATP-dependent H2AZ histone chaperone activity [GO:0140849]; ATP-dependent H3-H4 histone complex chaperone activity [GO:0140665]; chromatin extrusion motor activity [GO:0140584]; cohesin loader activity [GO:0061775]; DNA clamp loader activity [GO:0003689]; RNA helicase activity [GO:0003724]…	GO:0000027; GO:0003689; GO:0003724; GO:0005524; GO:0005829; GO:0005840; GO:0006401; GO:0016887; GO:0033592; GO:0061775; GO:0070417; GO:0140584; GO:0140665; GO:0140849
TRINITY_DN558_c0_g3_i1	6809	502	0.000450146	-0.498522	Downregulated	SA-E vs SA	DEF_STAAW	Peptide deformylase (PDF) (EC 3.5.1.88) (Polypeptide deformylase)	def def1 pdf1 MW0974		co-translational protein modification [GO:0043686]; translation [GO:0006412]		metal ion binding [GO:0046872]; peptide deformylase activity [GO:0042586]		def	3.5.1.88	FUNCTION: Removes the formyl group from the N-terminal Met of newly synthesized proteins. Requires at least a dipeptide for an efficient rate of reaction. N-terminal L-methionine is a prerequisite for activity but the enzyme has broad specificity at other positions. {ECO:0000255|HAMAP-Rule:MF_00163}.	Staphylococcus aureus (strain MW2)	DEF_STAAW	UPI00000D9D72	metal ion binding [GO:0046872]; peptide deformylase activity [GO:0042586]; co-translational protein modification [GO:0043686]; translation [GO:0006412]	GO:0006412; GO:0042586; GO:0043686; GO:0046872
TRINITY_DN18037_c0_g2_i1	165	37	0.0202481	0.379716	Upregulated	SA-E vs SA	DHA1_STAAC	Alanine dehydrogenase 1 (EC 1.4.1.1)	ald1 SACOL1478	PATHWAY: Amino-acid degradation; L-alanine degradation via dehydrogenase pathway; NH(3) and pyruvate from L-alanine: step 1/1.	L-alanine catabolic process [GO:0042853]	plasma membrane [GO:0005886]	alanine dehydrogenase activity [GO:0000286]		ald1	1.4.1.1	FUNCTION: May play a role in cell wall synthesis as L-alanine is an important constituent of the peptidoglycan layer. {ECO:0000250}.	Staphylococcus aureus (strain COL)	DHA1_STAAC	UPI00000CAD0F	plasma membrane [GO:0005886]; alanine dehydrogenase activity [GO:0000286]; L-alanine catabolic process [GO:0042853]	GO:0000286; GO:0005886; GO:0042853
TRINITY_DN46137_c0_g1_i1	14	7	0.0384743	1.01281	Upregulated	SA-E vs SA	DHE2_HALSI	NAD-specific glutamate dehydrogenase A (NAD-GDH A) (EC 1.4.1.2)	gdhX gdhA		glutamate catabolic process [GO:0006538]		glutamate dehydrogenase (NAD+) activity [GO:0004352]		gdhX	1.4.1.2		Halobacterium salinarum (Halobacterium halobium)	DHE2_HALSI	UPI00001292FE	glutamate dehydrogenase (NAD+) activity [GO:0004352]; glutamate catabolic process [GO:0006538]	GO:0004352; GO:0006538
TRINITY_DN758_c0_g1_i7	3378.42	116.31	2.04008e-14	-1.09974	Downregulated	SA-E vs SA	DHSC_BACSU	Succinate dehydrogenase cytochrome b558 subunit (Cytochrome b-558)	sdhC BSU28450	PATHWAY: Carbohydrate metabolism; tricarboxylic acid cycle.	tricarboxylic acid cycle [GO:0006099]	plasma membrane [GO:0005886]	metal ion binding [GO:0046872]		sdhC		FUNCTION: Di-heme cytochrome of the succinate dehydrogenase complex.	Bacillus subtilis (strain 168)	DHSC_BACSU	UPI0000060876	plasma membrane [GO:0005886]; metal ion binding [GO:0046872]; tricarboxylic acid cycle [GO:0006099]	GO:0005886; GO:0006099; GO:0046872
TRINITY_DN222_c1_g2_i1	40	13	0.0211185	0.672704	Upregulated	SA-E vs SA	DIVIB_STAAR	Cell division protein DivIB	divIB SAR1160		FtsZ-dependent cytokinesis [GO:0043093]	cell division site [GO:0032153]; plasma membrane [GO:0005886]			divIB		FUNCTION: Cell division protein that may be involved in stabilizing or promoting the assembly of the division complex. {ECO:0000255|HAMAP-Rule:MF_00912}.	Staphylococcus aureus (strain MRSA252)	DIVIB_STAAR	UPI00003B15CF	cell division site [GO:0032153]; plasma membrane [GO:0005886]; FtsZ-dependent cytokinesis [GO:0043093]	GO:0005886; GO:0032153; GO:0043093
TRINITY_DN14_c1_g1_i8	1	4	0.0389822	2.65457	Upregulated	SA-E vs SA	DKSA_SHIFL	RNA polymerase-binding transcription factor DksA	dksA SF0137 S0140		regulation of gene expression [GO:0010468]	cytoplasm [GO:0005737]	zinc ion binding [GO:0008270]		dksA		FUNCTION: Transcription factor that acts by binding directly to the RNA polymerase (RNAP). Required for negative regulation of rRNA expression and positive regulation of several amino acid biosynthesis promoters. Also required for regulation of fis expression. {ECO:0000255|HAMAP-Rule:MF_00926}.	Shigella flexneri	DKSA_SHIFL	UPI0000000B51	cytoplasm [GO:0005737]; zinc ion binding [GO:0008270]; regulation of gene expression [GO:0010468]	GO:0005737; GO:0008270; GO:0010468
TRINITY_DN6520_c0_g1_i1	20	12	0.00117769	1.15676	Upregulated	SA-E vs SA	DLDH1_PSEAE	Dihydrolipoyl dehydrogenase (EC 1.8.1.4) (Dihydrolipoamide dehydrogenase) (E3 component of branched-chain alpha-keto acid dehydrogenase complex) (LPD-Val)	lpdV PA2250		2-oxoglutarate metabolic process [GO:0006103]; pyruvate metabolic process [GO:0006090]	cytoplasm [GO:0005737]	dihydrolipoyl dehydrogenase activity [GO:0004148]; flavin adenine dinucleotide binding [GO:0050660]		lpdV	1.8.1.4	FUNCTION: The branched-chain alpha-keto dehydrogenase complex catalyzes the overall conversion of alpha-keto acids to acyl-CoA and CO(2). It contains multiple copies of 3 enzymatic components: branched-chain alpha-keto acid decarboxylase (E1), lipoamide acyltransferase (E2) and lipoamide dehydrogenase (E3) (By similarity). {ECO:0000250}.	Pseudomonas aeruginosa (strain ATCC 15692 / DSM 22644 / CIP 104116 / JCM 14847 / LMG 12228 / 1C / PRS 101 / PAO1)	DLDH1_PSEAE	UPI00000C562D	cytoplasm [GO:0005737]; dihydrolipoyl dehydrogenase activity [GO:0004148]; flavin adenine dinucleotide binding [GO:0050660]; 2-oxoglutarate metabolic process [GO:0006103]; pyruvate metabolic process [GO:0006090]	GO:0004148; GO:0005737; GO:0006090; GO:0006103; GO:0050660
TRINITY_DN630_c0_g1_i7	15913.6	854.71	1.14854e-08	-0.748616	Downregulated	SA-E vs SA	DNAA_STAAR	Chromosomal replication initiator protein DnaA	dnaA SAR0001		DNA replication initiation [GO:0006270]; regulation of DNA replication [GO:0006275]	cytoplasm [GO:0005737]; plasma membrane [GO:0005886]	ATP binding [GO:0005524]; ATP hydrolysis activity [GO:0016887]; DNA replication origin binding [GO:0003688]		dnaA		FUNCTION: Plays an essential role in the initiation and regulation of chromosomal replication. ATP-DnaA binds to the origin of replication (oriC) to initiate formation of the DNA replication initiation complex once per cell cycle. Binds the DnaA box (a 9 base pair repeat at the origin) and separates the double-stranded (ds)DNA. Forms a right-handed helical filament on oriC DNA; dsDNA binds to the…	Staphylococcus aureus (strain MRSA252)	DNAA_STAAR	UPI00003B12E0	cytoplasm [GO:0005737]; plasma membrane [GO:0005886]; ATP binding [GO:0005524]; ATP hydrolysis activity [GO:0016887]; DNA replication origin binding [GO:0003688]; DNA replication initiation [GO:0006270]; regulation of DNA replication [GO:0006275]	GO:0003688; GO:0005524; GO:0005737; GO:0005886; GO:0006270; GO:0006275; GO:0016887
TRINITY_DN3875_c0_g1_i4	3646.01	203.25	4.2181e-07	-0.719233	Downregulated	SA-E vs SA	DNAG_STAAR	DNA primase (EC 2.7.7.101)	dnaG SAR1639			cytoplasm [GO:0005737]; DNA-directed RNA polymerase complex [GO:0000428]; primosome complex [GO:1990077]	ATP binding [GO:0005524]; DNA binding [GO:0003677]; DNA helicase activity [GO:0003678]; DNA primase activity [GO:0003896]; zinc ion binding [GO:0008270]		dnaG	2.7.7.101	FUNCTION: RNA polymerase that catalyzes the synthesis of short RNA molecules used as primers for DNA polymerase during DNA replication. {ECO:0000255|HAMAP-Rule:MF_00974}.	Staphylococcus aureus (strain MRSA252)	DNAG_STAAR	UPI00003B170A	cytoplasm [GO:0005737]; DNA-directed RNA polymerase complex [GO:0000428]; primosome complex [GO:1990077]; ATP binding [GO:0005524]; DNA binding [GO:0003677]; DNA helicase activity [GO:0003678]; DNA primase activity [GO:0003896]; zinc ion binding [GO:0008270]	GO:0000428; GO:0003677; GO:0003678; GO:0003896; GO:0005524; GO:0005737; GO:0008270; GO:1990077
TRINITY_DN261_c0_g2_i1	353	26	0.0372991	-0.499289	Downregulated	SA-E vs SA	DNAK_STAAR	Chaperone protein DnaK (HSP70) (Heat shock 70 kDa protein) (Heat shock protein 70)	dnaK SAR1657				ATP binding [GO:0005524]; ATP-dependent protein folding chaperone [GO:0140662]; unfolded protein binding [GO:0051082]		dnaK		FUNCTION: Acts as a chaperone. {ECO:0000255|HAMAP-Rule:MF_00332}.	Staphylococcus aureus (strain MRSA252)	DNAK_STAAR	UPI0000129601	ATP binding [GO:0005524]; ATP-dependent protein folding chaperone [GO:0140662]; unfolded protein binding [GO:0051082]	GO:0005524; GO:0051082; GO:0140662
TRINITY_DN11655_c1_g2_i3	183.42	9	0.0116633	-0.819977	Downregulated	SA-E vs SA	DPO3_STAAB	DNA polymerase III PolC-type (PolIII) (EC 2.7.7.7)	polC SAB1126		DNA-templated DNA replication [GO:0006261]	cytoplasm [GO:0005737]	3'-5' exonuclease activity [GO:0008408]; DNA binding [GO:0003677]; DNA-directed DNA polymerase activity [GO:0003887]		polC	2.7.7.7	FUNCTION: Required for replicative DNA synthesis. This DNA polymerase also exhibits 3' to 5' exonuclease activity. {ECO:0000255|HAMAP-Rule:MF_00356}.	Staphylococcus aureus (strain bovine RF122 / ET3-1)	DPO3_STAAB	UPI00005FE461	cytoplasm [GO:0005737]; 3'-5' exonuclease activity [GO:0008408]; DNA binding [GO:0003677]; DNA-directed DNA polymerase activity [GO:0003887]; DNA-templated DNA replication [GO:0006261]	GO:0003677; GO:0003887; GO:0005737; GO:0006261; GO:0008408
TRINITY_DN9630_c1_g1_i2	51	1	0.0397031	-1.54418	Downregulated	SA-E vs SA	DPPD_PSEAB	Di/tripeptide transport ATP-binding protein DppD (EC 7.4.2.9)	dppD PA14_58470		peptide transport [GO:0015833]; protein transport [GO:0015031]	plasma membrane [GO:0005886]	ATP binding [GO:0005524]; ATP hydrolysis activity [GO:0016887]		dppD	7.4.2.9	FUNCTION: Part of the ABC transporter DppABCDF involved in the uptake of various di/tripeptides (PubMed:25338022). Is also involved in the uptake of phaseolotoxin, a toxic tripeptide inhibiting the enzyme ornithine carbamoyltransferase (PubMed:25338022). Responsible for energy coupling to the transport system (Probable). {ECO:0000269|PubMed:25338022, ECO:0000305}.	Pseudomonas aeruginosa (strain UCBPP-PA14)	DPPD_PSEAB	UPI00003963B2	plasma membrane [GO:0005886]; ATP binding [GO:0005524]; ATP hydrolysis activity [GO:0016887]; peptide transport [GO:0015833]; protein transport [GO:0015031]	GO:0005524; GO:0005886; GO:0015031; GO:0015833; GO:0016887
TRINITY_DN766_c1_g2_i1	270	19	0.0450954	-0.5353	Downregulated	SA-E vs SA	DYR_STAAR	Dihydrofolate reductase (DHFR) (EC 1.5.1.3)	folA SAR1439	PATHWAY: Cofactor biosynthesis; tetrahydrofolate biosynthesis; 5,6,7,8-tetrahydrofolate from 7,8-dihydrofolate: step 1/1.	dihydrofolate metabolic process [GO:0046452]; folic acid metabolic process [GO:0046655]; one-carbon metabolic process [GO:0006730]; tetrahydrofolate biosynthetic process [GO:0046654]	cytosol [GO:0005829]	dihydrofolate reductase activity [GO:0004146]; NADP binding [GO:0050661]		folA	1.5.1.3	FUNCTION: Key enzyme in folate metabolism. Catalyzes an essential reaction for de novo glycine and purine synthesis, and for DNA precursor synthesis (By similarity). {ECO:0000250}.	Staphylococcus aureus (strain MRSA252)	DYR_STAAR	UPI0000054A5B	cytosol [GO:0005829]; dihydrofolate reductase activity [GO:0004146]; NADP binding [GO:0050661]; dihydrofolate metabolic process [GO:0046452]; folic acid metabolic process [GO:0046655]; one-carbon metabolic process [GO:0006730]; tetrahydrofolate biosynthetic process [GO:0046654]	GO:0004146; GO:0005829; GO:0006730; GO:0046452; GO:0046654; GO:0046655; GO:0050661
TRINITY_DN862_c0_g1_i1	257	91	1.33472e-07	0.740376	Upregulated	SA-E vs SA	EBH_STAAC	Extracellular matrix-binding protein ebh (ECM-binding protein homolog)	ebh SACOL1472			plasma membrane [GO:0005886]			ebh			Staphylococcus aureus (strain COL)	EBH_STAAC	UPI00004B5D34	plasma membrane [GO:0005886]	GO:0005886
TRINITY_DN184_c2_g1_i1	111	1	0.000148835	-2.15819	Downregulated	SA-E vs SA	EBHA_STAAE	Extracellular matrix-binding protein EbhA (ECM-binding protein homolog A)	ebhA NWMN_1344			plasma membrane [GO:0005886]			ebhA			Staphylococcus aureus (strain Newman)	EBHA_STAAE	UPI0001574462	plasma membrane [GO:0005886]	GO:0005886
TRINITY_DN2666_c1_g1_i2	439	80.96	0.0444547	0.225352	Upregulated	SA-E vs SA	EBPS_STAAC	Elastin-binding protein EbpS	ebpS SACOL1522			plasma membrane [GO:0005886]			ebpS		FUNCTION: Promotes binding of soluble elastin peptides and tropoelastin to S.aureus cells although it is not able to promote bacterial adherence to immobilized elastin and, therefore, is not a microbial surface component recognizing adhesive matrix molecule (MSCRAMM). {ECO:0000250}.	Staphylococcus aureus (strain COL)	EBPS_STAAC	UPI00000B839A	plasma membrane [GO:0005886]	GO:0005886
TRINITY_DN425_c0_g2_i1	260	17	0.0260671	-0.593318	Downregulated	SA-E vs SA	EFEMO_STAAM	Efem/EfeO family lipoprotein	SAV0343			plasma membrane [GO:0005886]						Staphylococcus aureus (strain Mu50 / ATCC 700699)	EFEMO_STAAM	UPI000005457A	plasma membrane [GO:0005886]	GO:0005886
TRINITY_DN6407_c0_g1_i2	1013.22	46.45	4.8568e-07	-0.873631	Downregulated	SA-E vs SA	EFP_STAAR	Elongation factor P (EF-P)	efp SAR1606	PATHWAY: Protein biosynthesis; polypeptide chain elongation. {ECO:0000255|HAMAP-Rule:MF_00141}.	peptide biosynthetic process [GO:0043043]	cytoplasm [GO:0005737]	translation elongation factor activity [GO:0003746]		efp		FUNCTION: Involved in peptide bond synthesis. Stimulates efficient translation and peptide-bond synthesis on native or reconstituted 70S ribosomes in vitro. Probably functions indirectly by altering the affinity of the ribosome for aminoacyl-tRNA, thus increasing their reactivity as acceptors for peptidyl transferase. {ECO:0000255|HAMAP-Rule:MF_00141}.	Staphylococcus aureus (strain MRSA252)	EFP_STAAR	UPI00000542E4	cytoplasm [GO:0005737]; translation elongation factor activity [GO:0003746]; peptide biosynthetic process [GO:0043043]	GO:0003746; GO:0005737; GO:0043043
TRINITY_DN4716_c1_g3_i1	19	9	0.0101133	0.970127	Upregulated	SA-E vs SA	ELAS_PSEAB	Elastase (EC 3.4.24.26) [Cleaved into: Pro-elastase]	lasB PA14_16250		proteolysis [GO:0006508]	extracellular region [GO:0005576]	metal ion binding [GO:0046872]; metalloendopeptidase activity [GO:0004222]		lasB	3.4.24.26	FUNCTION: Cleaves host elastase, collagen, IgI and several complement components as well as endogenous pro-aminopeptidase, pro-chitin-binding protein (cbpD). Cleaves its own pro-peptide. Involved in the pathogenesis of P.aeruginosa infections. {ECO:0000250|UniProtKB:P14756}.	Pseudomonas aeruginosa (strain UCBPP-PA14)	ELAS_PSEAB	UPI000059F56A	extracellular region [GO:0005576]; metal ion binding [GO:0046872]; metalloendopeptidase activity [GO:0004222]; proteolysis [GO:0006508]	GO:0004222; GO:0005576; GO:0006508; GO:0046872
TRINITY_DN32188_c0_g1_i1	4	3	1.03151e-10	1.33294	Upregulated	SA-E vs SA	ELOA2_HUMAN	Elongin-A2 (EloA2) (RNA polymerase II transcription factor SIII subunit A2) (Transcription elongation factor B polypeptide 3B)	ELOA2 TCEB3B TCEB3L		regulation of DNA-templated transcription elongation [GO:0032784]; transcription by RNA polymerase II [GO:0006366]; transcription elongation by RNA polymerase II [GO:0006368]	elongin complex [GO:0070449]; nucleoplasm [GO:0005654]			ELOA2		FUNCTION: SIII, also known as elongin, is a general transcription elongation factor that increases the RNA polymerase II transcription elongation past template-encoded arresting sites. Subunit A2 is transcriptionally active but its transcription activity is not enhanced by binding to the dimeric complex of the SIII regulatory subunits B and C (elongin BC complex). {ECO:0000269|PubMed:10692460}.	Homo sapiens (Human)	ELOA2_HUMAN	UPI0000140A82	elongin complex [GO:0070449]; nucleoplasm [GO:0005654]; regulation of DNA-templated transcription elongation [GO:0032784]; transcription by RNA polymerase II [GO:0006366]; transcription elongation by RNA polymerase II [GO:0006368]	GO:0005654; GO:0006366; GO:0006368; GO:0032784; GO:0070449
TRINITY_DN4874_c2_g1_i1	10328.6	899.13	0.0142408	-0.367337	Downregulated	SA-E vs SA	ENGB_STAAS	Probable GTP-binding protein EngB	engB SAS1602		division septum assembly [GO:0000917]	cytosol [GO:0005829]	GTP binding [GO:0005525]; metal ion binding [GO:0046872]		engB		FUNCTION: Necessary for normal cell division and for the maintenance of normal septation. {ECO:0000255|HAMAP-Rule:MF_00321}.	Staphylococcus aureus (strain MSSA476)	ENGB_STAAS	UPI0000054C1F	cytosol [GO:0005829]; GTP binding [GO:0005525]; metal ion binding [GO:0046872]; division septum assembly [GO:0000917]	GO:0000917; GO:0005525; GO:0005829; GO:0046872
TRINITY_DN1653_c0_g2_i2	19.84	8.3	0.0452806	0.872045	Upregulated	SA-E vs SA	ENO_ECOBW	Enolase (EC 4.2.1.11) (2-phospho-D-glycerate hydro-lyase) (2-phosphoglycerate dehydratase)	eno BWG_2514	PATHWAY: Carbohydrate degradation; glycolysis; pyruvate from D-glyceraldehyde 3-phosphate: step 4/5. {ECO:0000255|HAMAP-Rule:MF_00318}.	glycolytic process [GO:0006096]	cell surface [GO:0009986]; extracellular region [GO:0005576]; phosphopyruvate hydratase complex [GO:0000015]	magnesium ion binding [GO:0000287]; phosphopyruvate hydratase activity [GO:0004634]		eno	4.2.1.11	FUNCTION: Catalyzes the reversible conversion of 2-phosphoglycerate (2-PG) into phosphoenolpyruvate (PEP). It is essential for the degradation of carbohydrates via glycolysis. {ECO:0000255|HAMAP-Rule:MF_00318}.	Escherichia coli (strain K12 / MC4100 / BW2952)	ENO_ECOBW	UPI00001639F9	cell surface [GO:0009986]; extracellular region [GO:0005576]; phosphopyruvate hydratase complex [GO:0000015]; magnesium ion binding [GO:0000287]; phosphopyruvate hydratase activity [GO:0004634]; glycolytic process [GO:0006096]	GO:0000015; GO:0000287; GO:0004634; GO:0005576; GO:0006096; GO:0009986
TRINITY_DN50962_c0_g1_i1	322	5	1.34108e-08	-1.72836	Downregulated	SA-E vs SA	ERA_STAAR	GTPase Era	era SAR1644		ribosomal small subunit assembly [GO:0000028]	cytosol [GO:0005829]; plasma membrane [GO:0005886]	GTP binding [GO:0005525]; GTPase activity [GO:0003924]; ribosomal small subunit binding [GO:0043024]; small ribosomal subunit rRNA binding [GO:0070181]		era		FUNCTION: An essential GTPase that binds both GDP and GTP, with rapid nucleotide exchange. Plays a role in 16S rRNA processing and 30S ribosomal subunit biogenesis and possibly also in cell cycle regulation and energy metabolism. {ECO:0000255|HAMAP-Rule:MF_00367}.	Staphylococcus aureus (strain MRSA252)	ERA_STAAR	UPI000012A100	cytosol [GO:0005829]; plasma membrane [GO:0005886]; GTP binding [GO:0005525]; GTPase activity [GO:0003924]; ribosomal small subunit binding [GO:0043024]; small ribosomal subunit rRNA binding [GO:0070181]; ribosomal small subunit assembly [GO:0000028]	GO:0000028; GO:0003924; GO:0005525; GO:0005829; GO:0005886; GO:0043024; GO:0070181
TRINITY_DN7067_c0_g1_i1	130	38	0.00104733	0.589	Upregulated	SA-E vs SA	ESSA_STAAW	ESAT-6 secretion machinery protein EssA	essA MW0260			plasma membrane [GO:0005886]			essA		FUNCTION: Component of the ESAT-6 secretion system (Ess). Required for the secretion of EsxA and EsxB. {ECO:0000250|UniProtKB:P0C052}.	Staphylococcus aureus (strain MW2)	ESSA_STAAW	UPI0000054661	plasma membrane [GO:0005886]	GO:0005886
TRINITY_DN739_c0_g2_i7	1730.61	74.28	3.70276e-09	-0.925641	Downregulated	SA-E vs SA	EZRA_STAA8	Septation ring formation regulator EzrA	ezrA SAOUHSC_01827		division septum assembly [GO:0000917]; septin ring assembly [GO:0000921]	plasma membrane [GO:0005886]; septin ring [GO:0005940]			ezrA		FUNCTION: Negative regulator of FtsZ ring formation; modulates the frequency and position of FtsZ ring formation. Inhibits FtsZ ring formation at polar sites. Interacts either with FtsZ or with one of its binding partners to promote depolymerization. {ECO:0000255|HAMAP-Rule:MF_00728}.	Staphylococcus aureus (strain NCTC 8325 / PS 47)	EZRA_STAA8	UPI000069AAE2	plasma membrane [GO:0005886]; septin ring [GO:0005940]; division septum assembly [GO:0000917]; septin ring assembly [GO:0000921]	GO:0000917; GO:0000921; GO:0005886; GO:0005940
TRINITY_DN134_c0_g4_i1	235	70	3.20679e-05	0.603889	Upregulated	SA-E vs SA	F16PC_STAAW	Fructose-1,6-bisphosphatase class 3 (FBPase class 3) (EC 3.1.3.11) (D-fructose-1,6-bisphosphate 1-phosphohydrolase class 3)	fbp MW2435	PATHWAY: Carbohydrate biosynthesis; gluconeogenesis. {ECO:0000255|HAMAP-Rule:MF_01854}.	gluconeogenesis [GO:0006094]		fructose 1,6-bisphosphate 1-phosphatase activity [GO:0042132]		fbp	3.1.3.11		Staphylococcus aureus (strain MW2)	F16PC_STAAW	UPI00000D9FF1	fructose 1,6-bisphosphate 1-phosphatase activity [GO:0042132]; gluconeogenesis [GO:0006094]	GO:0006094; GO:0042132
TRINITY_DN22116_c0_g2_i1	5	6	0.00749061	1.70401	Upregulated	SA-E vs SA	FABG_SALTI	3-oxoacyl-[acyl-carrier-protein] reductase FabG (EC 1.1.1.100) (3-ketoacyl-acyl carrier protein reductase) (Beta-Ketoacyl-acyl carrier protein reductase) (Beta-ketoacyl-ACP reductase)	fabG STY1234 t1725	PATHWAY: Lipid metabolism; fatty acid biosynthesis.	fatty acid elongation [GO:0030497]		3-oxoacyl-[acyl-carrier-protein] reductase (NADPH) activity [GO:0004316]; metal ion binding [GO:0046872]; NAD binding [GO:0051287]; NADP binding [GO:0050661]		fabG	1.1.1.100	FUNCTION: Catalyzes the NADPH-dependent reduction of beta-ketoacyl-ACP substrates to beta-hydroxyacyl-ACP products, the first reductive step in the elongation cycle of fatty acid biosynthesis. {ECO:0000250}.	Salmonella typhi	FABG_SALTI	UPI0000059F9C	3-oxoacyl-[acyl-carrier-protein] reductase (NADPH) activity [GO:0004316]; metal ion binding [GO:0046872]; NAD binding [GO:0051287]; NADP binding [GO:0050661]; fatty acid elongation [GO:0030497]	GO:0004316; GO:0030497; GO:0046872; GO:0050661; GO:0051287
TRINITY_DN9078_c1_g1_i1	3521	254	0.000470682	-0.515707	Downregulated	SA-E vs SA	FABH_STAAR	Beta-ketoacyl-[acyl-carrier-protein] synthase III (Beta-ketoacyl-ACP synthase III) (KAS III) (EC 2.3.1.180) (3-oxoacyl-[acyl-carrier-protein] synthase 3) (3-oxoacyl-[acyl-carrier-protein] synthase III)	fabH SAR0946	PATHWAY: Lipid metabolism; fatty acid biosynthesis. {ECO:0000255|HAMAP-Rule:MF_01815}.	fatty acid biosynthetic process [GO:0006633]	cytoplasm [GO:0005737]	3-oxoacyl-[acyl-carrier-protein] synthase activity [GO:0004315]; beta-ketoacyl-acyl-carrier-protein synthase III activity [GO:0033818]		fabH	2.3.1.180	FUNCTION: Catalyzes the condensation reaction of fatty acid synthesis by the addition to an acyl acceptor of two carbons from malonyl-ACP. Catalyzes the first condensation reaction which initiates fatty acid synthesis and may therefore play a role in governing the total rate of fatty acid production. Possesses both acetoacetyl-ACP synthase and acetyl transacylase activities. Its substrate specifi…	Staphylococcus aureus (strain MRSA252)	FABH_STAAR	UPI00000CAB7F	cytoplasm [GO:0005737]; 3-oxoacyl-[acyl-carrier-protein] synthase activity [GO:0004315]; beta-ketoacyl-acyl-carrier-protein synthase III activity [GO:0033818]; fatty acid biosynthetic process [GO:0006633]	GO:0004315; GO:0005737; GO:0006633; GO:0033818
TRINITY_DN50997_c0_g1_i1	227	14	0.0248254	-0.639445	Downregulated	SA-E vs SA	FENR_STAAW	Ferredoxin--NADP reductase (FNR) (Fd-NADP(+) reductase) (EC 1.18.1.2)	MW2294				ferredoxin-NADP+ reductase activity [GO:0004324]; flavin adenine dinucleotide binding [GO:0050660]; NADP binding [GO:0050661]			1.18.1.2		Staphylococcus aureus (strain MW2)	FENR_STAAW	UPI00000D9F99	ferredoxin-NADP+ reductase activity [GO:0004324]; flavin adenine dinucleotide binding [GO:0050660]; NADP binding [GO:0050661]	GO:0004324; GO:0050660; GO:0050661
TRINITY_DN3222_c0_g1_i1	1152	72	0.000194154	-0.628941	Downregulated	SA-E vs SA	FEOB_STAAR	Fe(2+) transporter FeoB (Ferrous iron transport protein B)	feoB SAR2630			plasma membrane [GO:0005886]	ferrous iron transmembrane transporter activity [GO:0015093]; GTP binding [GO:0005525]		feoB		FUNCTION: Probable transporter of a GTP-driven Fe(2+) uptake system. {ECO:0000250|UniProtKB:P33650}.	Staphylococcus aureus (strain MRSA252)	FEOB_STAAR	UPI00003B1993	plasma membrane [GO:0005886]; ferrous iron transmembrane transporter activity [GO:0015093]; GTP binding [GO:0005525]	GO:0005525; GO:0005886; GO:0015093
TRINITY_DN896_c1_g1_i3	67.47	20	0.0101916	0.600052	Upregulated	SA-E vs SA	FIB_STAAW	Fibrinogen-binding protein	fib efb MW1040			extracellular space [GO:0005615]	complement binding [GO:0001848]		fib		FUNCTION: Extracellular fibrinogen-binding protein that plays an important role in virulence. By interacting with the alpha chain of fibrinogen and its derivative fibrin, enhances a non-functional interaction between fibrinogen and platelets and is responsible for repression of fibrinogen-dependent platelet aggregation. In addition, assembles a fibrinogen protective shield around the bacteria whi…	Staphylococcus aureus (strain MW2)	FIB_STAAW	UPI00000D9D87	extracellular space [GO:0005615]; complement binding [GO:0001848]	GO:0001848; GO:0005615
TRINITY_DN7260_c0_g1_i1	13	13	7.67958e-05	1.56007	Upregulated	SA-E vs SA	FKBX_PSEFL	Probable FKBP-type 16 kDa peptidyl-prolyl cis-trans isomerase (PPIase) (EC 5.2.1.8) (Rotamase)	yaaD		protein folding [GO:0006457]		RNA polymerase II CTD heptapeptide repeat P3 isomerase activity [GO:0140839]; RNA polymerase II CTD heptapeptide repeat P6 isomerase activity [GO:0140840]		yaaD	5.2.1.8	FUNCTION: PPIases accelerate the folding of proteins.	Pseudomonas fluorescens	FKBX_PSEFL	UPI000012A831	RNA polymerase II CTD heptapeptide repeat P3 isomerase activity [GO:0140839]; RNA polymerase II CTD heptapeptide repeat P6 isomerase activity [GO:0140840]; protein folding [GO:0006457]	GO:0006457; GO:0140839; GO:0140840
TRINITY_DN33165_c0_g1_i2	3	12	1.67695e-09	2.65457	Upregulated	SA-E vs SA	FLIC_SALTY	Flagellin (Phase 1-I flagellin)	fliC flaF hag STM1959			bacterial-type flagellum [GO:0009288]; extracellular space [GO:0005615]	receptor ligand activity [GO:0048018]; structural molecule activity [GO:0005198]		fliC		FUNCTION: Flagellin is the subunit protein which polymerizes to form the filaments of bacterial flagella.	Salmonella typhimurium (strain LT2 / SGSC1412 / ATCC 700720)	FLIC_SALTY	UPI0000162276	bacterial-type flagellum [GO:0009288]; extracellular space [GO:0005615]; receptor ligand activity [GO:0048018]; structural molecule activity [GO:0005198]	GO:0005198; GO:0005615; GO:0009288; GO:0048018
TRINITY_DN35929_c0_g1_i1	2	2	2.70647e-07	1.56007	Upregulated	SA-E vs SA	FLNC_MOUSE	Filamin-C (FLN-C) (ABP-280-like protein) (ABP-L) (Actin-binding-like protein) (Filamin-2) (Gamma-filamin)	Flnc Abpl Fln2		actin filament-based process [GO:0030029]; muscle cell development [GO:0055001]; sarcomere organization [GO:0045214]	actin cytoskeleton [GO:0015629]; cytosol [GO:0005829]; intercellular bridge [GO:0045171]; sarcolemma [GO:0042383]; sarcoplasm [GO:0016528]; Z disc [GO:0030018]	actin binding [GO:0003779]; actin filament binding [GO:0051015]; ankyrin binding [GO:0030506]		Flnc		FUNCTION: Muscle-specific filamin, which plays a central role in sarcomere assembly and organization (By similarity). Critical for normal myogenesis, it probably functions as a large actin-cross-linking protein with structural functions at the Z lines in muscle cells. May be involved in reorganizing the actin cytoskeleton in response to signaling events (PubMed:16914736). {ECO:0000250|UniProtKB:Q…	Mus musculus (Mouse)	FLNC_MOUSE	UPI0000603B70	actin cytoskeleton [GO:0015629]; cytosol [GO:0005829]; intercellular bridge [GO:0045171]; sarcolemma [GO:0042383]; sarcoplasm [GO:0016528]; Z disc [GO:0030018]; actin binding [GO:0003779]; actin filament binding [GO:0051015]; ankyrin binding [GO:0030506]; actin filament-based process [GO:0030029]; muscle cell development [GO:0055001]; sarcomere organization [GO:0045214]	GO:0003779; GO:0005829; GO:0015629; GO:0016528; GO:0030018; GO:0030029; GO:0030506; GO:0042383; GO:0045171; GO:0045214; GO:0051015; GO:0055001
TRINITY_DN1032_c0_g1_i2	526.11	28	0.000300221	-0.75583	Downregulated	SA-E vs SA	FLP_STAAC	Protein flp (FmtA-like protein)	flp SACOL2445			plasma membrane [GO:0005886]			flp		FUNCTION: Its precise function is unknown. Has no penicillin-binding activity and is not involved in methicillin resistance. {ECO:0000269|PubMed:10867231}.	Staphylococcus aureus (strain COL)	FLP_STAAC	UPI00004B5CCD	plasma membrane [GO:0005886]	GO:0005886
TRINITY_DN5703_c0_g1_i1	23	17	1.36697e-05	1.32141	Upregulated	SA-E vs SA	FLP_STAAM	Protein flp (FmtA-like protein)	flp SAV2441			plasma membrane [GO:0005886]			flp		FUNCTION: Its precise function is unknown. Has no penicillin-binding activity and is not involved in methicillin resistance (By similarity). {ECO:0000250}.	Staphylococcus aureus (strain Mu50 / ATCC 700699)	FLP_STAAM	UPI00000CAC90	plasma membrane [GO:0005886]	GO:0005886
TRINITY_DN710_c0_g4_i1	904	75	0.0293565	-0.405312	Downregulated	SA-E vs SA	FMO_STAAM	Putative flavoprotein monooxygenase (EC 1.-.-.-) (Baeyer-Villiger flavin-containing monooxygenase) (BVFMO) (Baeyer-Villiger monooxygenase) (BVMO) (Flavin-containing monooxygenase) (FMO) (SAFMO)	SAV2584				flavin adenine dinucleotide binding [GO:0050660]; monooxygenase activity [GO:0004497]			1.-.-.-	FUNCTION: FAD-binding protein that may have monooxygenase activity using NADPH and/or NADH as an electron donor. {ECO:0000305}.	Staphylococcus aureus (strain Mu50 / ATCC 700699)	FMO_STAAM	UPI00000CAD64	flavin adenine dinucleotide binding [GO:0050660]; monooxygenase activity [GO:0004497]	GO:0004497; GO:0050660
TRINITY_DN68_c0_g1_i9	519.68	4.26	5.22872e-15	-2.23273	Downregulated	SA-E vs SA	FNBA_STAAC	Fibronectin-binding protein A	fnbA SACOL2511		cell adhesion [GO:0007155]	extracellular region [GO:0005576]			fnbA		FUNCTION: Promotes bacterial attachment to multiple substrates, such as fibronectin (Fn), fibrinogen (Fg), elastin peptides and tropoelastin. This confers to S.aureus the ability to invade endothelial cells. Promotes adherence to and aggregation of activated platelets (By similarity). {ECO:0000250}.	Staphylococcus aureus (strain COL)	FNBA_STAAC	UPI0000052256	extracellular region [GO:0005576]; cell adhesion [GO:0007155]	GO:0005576; GO:0007155
TRINITY_DN68_c0_g1_i30	457.88	85.5	0.0325723	0.235184	Upregulated	SA-E vs SA	FNBB_STAA3	Fibronectin-binding protein B	fnbB SAUSA300_2440		cell adhesion [GO:0007155]	extracellular region [GO:0005576]			fnbB		FUNCTION: Multifunctional protein which promotes bacterial attachment to fibrinogen, elastin and fibronectin (PubMed:15234962, PubMed:21569203, PubMed:27387503). Also promotes the accumulation phase and the primary attachment phase of biofilm formation (PubMed:24628034). In addition, protects against the antimicrobial activity of histones. Mechanistically, captures histones and prevents them from…	Staphylococcus aureus (strain USA300)	FNBB_STAA3	UPI00000B7719	extracellular region [GO:0005576]; cell adhesion [GO:0007155]	GO:0005576; GO:0007155
TRINITY_DN477_c0_g1_i1	3639.53	625.76	0.0301003	0.170008	Upregulated	SA-E vs SA	FOLB_STAAS	Dihydroneopterin aldolase (DHNA) (EC 4.1.2.25) (7,8-dihydroneopterin 2'-epimerase) (7,8-dihydroneopterin aldolase) (7,8-dihydroneopterin epimerase) (EC 5.1.99.8) (Dihydroneopterin epimerase)	folB SAS0472	PATHWAY: Cofactor biosynthesis; tetrahydrofolate biosynthesis; 2-amino-4-hydroxy-6-hydroxymethyl-7,8-dihydropteridine diphosphate from 7,8-dihydroneopterin triphosphate: step 3/4.	folic acid biosynthetic process [GO:0046656]; tetrahydrofolate biosynthetic process [GO:0046654]	cytoplasm [GO:0005737]	dihydroneopterin aldolase activity [GO:0004150]; isomerase activity [GO:0016853]		folB	4.1.2.25; 5.1.99.8	FUNCTION: Catalyzes the conversion of 7,8-dihydroneopterin to 6-hydroxymethyl-7,8-dihydropterin. Can also catalyze the epimerization of carbon 2' of dihydroneopterin to dihydromonapterin. {ECO:0000250|UniProtKB:P56740}.	Staphylococcus aureus (strain MSSA476)	FOLB_STAAS	UPI00000D7721	cytoplasm [GO:0005737]; dihydroneopterin aldolase activity [GO:0004150]; isomerase activity [GO:0016853]; folic acid biosynthetic process [GO:0046656]; tetrahydrofolate biosynthetic process [GO:0046654]	GO:0004150; GO:0005737; GO:0016853; GO:0046654; GO:0046656
TRINITY_DN11740_c0_g1_i1	45	1	0.0452806	-1.44536	Downregulated	SA-E vs SA	FTN_STAAM	Bacterial non-heme ferritin (EC 1.16.3.2)	ftnA SAV1893		intracellular sequestering of iron ion [GO:0006880]; iron ion transport [GO:0006826]	cytosol [GO:0005829]	ferric iron binding [GO:0008199]; ferrous iron binding [GO:0008198]; ferroxidase activity [GO:0004322]		ftnA	1.16.3.2	FUNCTION: Iron-storage protein. {ECO:0000250}.	Staphylococcus aureus (strain Mu50 / ATCC 700699)	FTN_STAAM	UPI0000054490	cytosol [GO:0005829]; ferric iron binding [GO:0008199]; ferrous iron binding [GO:0008198]; ferroxidase activity [GO:0004322]; intracellular sequestering of iron ion [GO:0006880]; iron ion transport [GO:0006826]	GO:0004322; GO:0005829; GO:0006826; GO:0006880; GO:0008198; GO:0008199
TRINITY_DN12487_c0_g3_i1	178	7	0.0028866	-0.994713	Downregulated	SA-E vs SA	FTSA_STAAR	Cell division protein FtsA	ftsA SAR1161		FtsZ-dependent cytokinesis [GO:0043093]	cell division site [GO:0032153]; cytoplasmic side of plasma membrane [GO:0009898]			ftsA		FUNCTION: Cell division protein that is involved in the assembly of the Z ring. May serve as a membrane anchor for the Z ring. {ECO:0000255|HAMAP-Rule:MF_02033}.	Staphylococcus aureus (strain MRSA252)	FTSA_STAAR	UPI00003B15D0	cell division site [GO:0032153]; cytoplasmic side of plasma membrane [GO:0009898]; FtsZ-dependent cytokinesis [GO:0043093]	GO:0009898; GO:0032153; GO:0043093
TRINITY_DN41107_c0_g1_i1	6	2	1.27137e-22	0.692693	Upregulated	SA-E vs SA	FTSZ_CAUVC	Cell division protein FtsZ	ftsZ CC_2540		division septum assembly [GO:0000917]; FtsZ-dependent cytokinesis [GO:0043093]; protein polymerization [GO:0051258]	cell division site [GO:0032153]; cytoplasm [GO:0005737]	GTP binding [GO:0005525]; GTPase activity [GO:0003924]		ftsZ		FUNCTION: Essential cell division protein that forms a contractile ring structure (Z ring) at the future cell division site. The regulation of the ring assembly controls the timing and the location of cell division. One of the functions of the FtsZ ring is to recruit other cell division proteins to the septum to produce a new cell wall between the dividing cells. Binds GTP and shows GTPase activi…	Caulobacter vibrioides (strain ATCC 19089 / CIP 103742 / CB 15) (Caulobacter crescentus)	FTSZ_CAUVC	UPI000012AD19	cell division site [GO:0032153]; cytoplasm [GO:0005737]; GTP binding [GO:0005525]; GTPase activity [GO:0003924]; division septum assembly [GO:0000917]; FtsZ-dependent cytokinesis [GO:0043093]; protein polymerization [GO:0051258]	GO:0000917; GO:0003924; GO:0005525; GO:0005737; GO:0032153; GO:0043093; GO:0051258
TRINITY_DN1047_c0_g2_i2	3439.72	229.3	7.15053e-05	-0.578037	Downregulated	SA-E vs SA	FUMC_STAAW	Fumarate hydratase class II (Fumarase C) (EC 4.2.1.2) (Aerobic fumarase) (Iron-independent fumarase)	fumC citG MW1792	PATHWAY: Carbohydrate metabolism; tricarboxylic acid cycle; (S)-malate from fumarate: step 1/1. {ECO:0000255|HAMAP-Rule:MF_00743}.	fumarate metabolic process [GO:0006106]; malate metabolic process [GO:0006108]; tricarboxylic acid cycle [GO:0006099]	cytoplasm [GO:0005737]	fumarate hydratase activity [GO:0004333]		fumC	4.2.1.2	FUNCTION: Involved in the TCA cycle. Catalyzes the stereospecific interconversion of fumarate to L-malate. {ECO:0000255|HAMAP-Rule:MF_00743}.	Staphylococcus aureus (strain MW2)	FUMC_STAAW	UPI00000D9ED4	cytoplasm [GO:0005737]; fumarate hydratase activity [GO:0004333]; fumarate metabolic process [GO:0006106]; malate metabolic process [GO:0006108]; tricarboxylic acid cycle [GO:0006099]	GO:0004333; GO:0005737; GO:0006099; GO:0006106; GO:0006108
TRINITY_DN8231_c0_g4_i1	13	9	0.0024261	1.26974	Upregulated	SA-E vs SA	FUR_PSEAE	Ferric uptake regulation protein (Ferric uptake regulator)	fur PA4764		negative regulation of DNA-templated transcription [GO:0045892]; negative regulation of siderophore biosynthetic process [GO:1900705]; siderophore biosynthetic process [GO:0019290]	cytosol [GO:0005829]; protein-DNA complex [GO:0032993]	DNA-binding transcription factor activity [GO:0003700]; DNA-binding transcription repressor activity [GO:0001217]; ferrous iron binding [GO:0008198]; transcription cis-regulatory region binding [GO:0000976]; zinc ion binding [GO:0008270]		fur		FUNCTION: Fur acts as a repressor, employing Fe(2+) as a cofactor to bind the operator of the iron transport operon. Involved in exotoxin A regulation, siderophore regulation and manganese susceptibility.	Pseudomonas aeruginosa (strain ATCC 15692 / DSM 22644 / CIP 104116 / JCM 14847 / LMG 12228 / 1C / PRS 101 / PAO1)	FUR_PSEAE	UPI000012AD84	cytosol [GO:0005829]; protein-DNA complex [GO:0032993]; DNA-binding transcription factor activity [GO:0003700]; DNA-binding transcription repressor activity [GO:0001217]; ferrous iron binding [GO:0008198]; transcription cis-regulatory region binding [GO:0000976]; zinc ion binding [GO:0008270]; negative regulation of DNA-templated transcription [GO:0045892]; negative regulation of siderophore bios…	GO:0000976; GO:0001217; GO:0003700; GO:0005829; GO:0008198; GO:0008270; GO:0019290; GO:0032993; GO:0045892; GO:1900705
TRINITY_DN39322_c0_g1_i1	4	1	0.00576685	0.465563	Upregulated	SA-E vs SA	FX4L4_HUMAN	Forkhead box protein D4-like 4 (FOXD4-like 4) (Forkhead box protein D4-like 2) (Forkhead box protein D4B) (Myeloid factor-gamma)	FOXD4L4 FOXD4B FOXD4L2		anatomical structure morphogenesis [GO:0009653]; cell differentiation [GO:0030154]; regulation of transcription by RNA polymerase II [GO:0006357]	chromatin [GO:0000785]; nucleus [GO:0005634]	DNA-binding transcription factor activity, RNA polymerase II-specific [GO:0000981]; RNA polymerase II cis-regulatory region sequence-specific DNA binding [GO:0000978]		FOXD4L4			Homo sapiens (Human)	FX4L4_HUMAN	UPI0000246F14	chromatin [GO:0000785]; nucleus [GO:0005634]; DNA-binding transcription factor activity, RNA polymerase II-specific [GO:0000981]; RNA polymerase II cis-regulatory region sequence-specific DNA binding [GO:0000978]; anatomical structure morphogenesis [GO:0009653]; cell differentiation [GO:0030154]; regulation of transcription by RNA polymerase II [GO:0006357]	GO:0000785; GO:0000978; GO:0000981; GO:0005634; GO:0006357; GO:0009653; GO:0030154
TRINITY_DN2778_c0_g1_i2	15	12.41	0.000206996	1.41041	Upregulated	SA-E vs SA	G3P_SALTI	Glyceraldehyde-3-phosphate dehydrogenase (GAPDH) (EC 1.2.1.12) (NAD-dependent glyceraldehyde-3-phosphate dehydrogenase)	gapA gap STY1825 t1169	PATHWAY: Carbohydrate degradation; glycolysis; pyruvate from D-glyceraldehyde 3-phosphate: step 1/5. {ECO:0000305}.	glucose metabolic process [GO:0006006]; glycolytic process [GO:0006096]	cytoplasm [GO:0005737]	glyceraldehyde-3-phosphate dehydrogenase (NAD+) (phosphorylating) activity [GO:0004365]; NAD binding [GO:0051287]; NADP binding [GO:0050661]		gapA	1.2.1.12	FUNCTION: Catalyzes the oxidative phosphorylation of glyceraldehyde 3-phosphate (G3P) to 1,3-bisphosphoglycerate (BPG) using the cofactor NAD. The first reaction step involves the formation of a hemiacetal intermediate between G3P and a cysteine residue, and this hemiacetal intermediate is then oxidized to a thioester, with concomitant reduction of NAD to NADH. The reduced NADH is then exchanged …	Salmonella typhi	G3P_SALTI	UPI0000059D9E	cytoplasm [GO:0005737]; glyceraldehyde-3-phosphate dehydrogenase (NAD+) (phosphorylating) activity [GO:0004365]; NAD binding [GO:0051287]; NADP binding [GO:0050661]; glucose metabolic process [GO:0006006]; glycolytic process [GO:0006096]	GO:0004365; GO:0005737; GO:0006006; GO:0006096; GO:0050661; GO:0051287
TRINITY_DN18739_c1_g1_i1	152	4	0.000588384	-1.31187	Downregulated	SA-E vs SA	G3P2_STAAS	Glyceraldehyde-3-phosphate dehydrogenase 2 (GAPDH 2) (EC 1.2.1.12) (NAD-dependent glyceraldehyde-3-phosphate dehydrogenase)	gapA2 gapB SAS1615	PATHWAY: Carbohydrate degradation; glycolysis; pyruvate from D-glyceraldehyde 3-phosphate: step 1/5. {ECO:0000305}.	glucose metabolic process [GO:0006006]; glycolytic process [GO:0006096]	cytoplasm [GO:0005737]	glyceraldehyde-3-phosphate dehydrogenase (NAD+) (phosphorylating) activity [GO:0004365]; NAD binding [GO:0051287]; NADP binding [GO:0050661]		gapA2	1.2.1.12	FUNCTION: Catalyzes the oxidative phosphorylation of glyceraldehyde 3-phosphate (G3P) to 1,3-bisphosphoglycerate (BPG) using the cofactor NAD. The first reaction step involves the formation of a hemiacetal intermediate between G3P and a cysteine residue, and this hemiacetal intermediate is then oxidized to a thioester, with concomitant reduction of NAD to NADH. The reduced NADH is then exchanged …	Staphylococcus aureus (strain MSSA476)	G3P2_STAAS	UPI00000D7659	cytoplasm [GO:0005737]; glyceraldehyde-3-phosphate dehydrogenase (NAD+) (phosphorylating) activity [GO:0004365]; NAD binding [GO:0051287]; NADP binding [GO:0050661]; glucose metabolic process [GO:0006006]; glycolytic process [GO:0006096]	GO:0004365; GO:0005737; GO:0006006; GO:0006096; GO:0050661; GO:0051287
[truncated: 380 more rows]

## Sheet: count of GO-terms
Description	Count	Category
cell adhesion	15	BP
tricarboxylic acid cycle	12	BP
cell wall organization	12	BP
regulation of DNA-templated transcription	10	BP
cell division	8	BP
transmembrane transport	8	BP
glycolytic process	8	BP
protein transport	7	BP
[truncated: 825 more rows]

## Sheet: count-of pathways
Pathway	Count
[truncated: 31 more rows]
