# Supplementary material for: Transcriptional plasticity enables Staphylococcus aureus adaptation to polymicrobial interactions
Source: Research Square preprint supplement (doi:10.21203/rs.3.rs-6909814/v1), 2025-07-17
Supplement: Supplementary file 3 [file 40ead950eb5f45f00b5548fb.xlsx]

## Sheet: All-DEGs
gene_id	SA	SA-C	Pvalue	logFC	category	condition
TRINITY_DN0_c0_g1_i10	84657.4	37	0	-0.671141	Downregulated	SA-C vs SA
TRINITY_DN0_c0_g1_i14	175.69	13712.5	4.5489e-25	0.364908	Upregulated	SA-C vs SA
TRINITY_DN0_c0_g1_i19	5153.8	14232	1.04245e-28	0.0786186	Upregulated	SA-C vs SA
TRINITY_DN0_c0_g1_i20	25.01	858.54	0.000325474	0.294537	Upregulated	SA-C vs SA
TRINITY_DN0_c0_g1_i22	389.68	7.84	3.2732e-100	-0.34306	Downregulated	SA-C vs SA
TRINITY_DN0_c0_g1_i27	13.81	372.16	0.0573089	0.273801	Nonsignificant	SA-C vs SA
TRINITY_DN1_c13_g1_i1	27	83451	1.24793e-141	0.680093	Upregulated	SA-C vs SA
TRINITY_DN10_c0_g1_i18	125.62	1262.29	0.0307543	0.189282	Upregulated	SA-C vs SA
TRINITY_DN10_c1_g1_i2	15	1	1.26331e-07	-0.240419	Downregulated	SA-C vs SA
TRINITY_DN10_c3_g1_i6	2	747	1.42611e-14	0.499039	Upregulated	SA-C vs SA
TRINITY_DN1000_c0_g1_i1	3161	3	7.04907e-192	-0.604707	Downregulated	SA-C vs SA
TRINITY_DN1000_c0_g5_i1	1292	3	7.0869e-153	-0.528054	Downregulated	SA-C vs SA
TRINITY_DN1000_c1_g1_i1	393.45	1	1.76963e-100	-0.52031	Downregulated	SA-C vs SA
TRINITY_DN1001_c0_g1_i1	6420.16	2	1.06451e-222	-0.700151	Downregulated	SA-C vs SA
TRINITY_DN10039_c1_g1_i1	138	1	5.15309e-54	-0.430549	Downregulated	SA-C vs SA
TRINITY_DN1004_c0_g3_i1	21	47997	5.83444e-123	0.654235	Upregulated	SA-C vs SA
TRINITY_DN1004_c1_g1_i1	14	2634	1.24982e-26	0.440291	Upregulated	SA-C vs SA
TRINITY_DN1008_c0_g1_i1	346.16	2	8.49857e-95	-0.449954	Downregulated	SA-C vs SA
TRINITY_DN1012_c0_g1_i7	9327.74	7	6.1118e-239	-0.624824	Downregulated	SA-C vs SA
TRINITY_DN10131_c0_g2_i1	1729	1	1.36278e-165	-0.647139	Downregulated	SA-C vs SA
TRINITY_DN102_c0_g1_i2	59	28647	5.39769e-79	0.521516	Upregulated	SA-C vs SA
TRINITY_DN102_c0_g4_i1	1	9827	2.27562e-83	0.779194	Upregulated	SA-C vs SA
TRINITY_DN102_c1_g2_i1	37	7314	9.03448e-41	0.444525	Upregulated	SA-C vs SA
TRINITY_DN102_c1_g3_i1	3	29216	5.85559e-122	0.77842	Upregulated	SA-C vs SA
TRINITY_DN10211_c0_g3_i2	1509.33	3	1.17573e-159	-0.541374	Downregulated	SA-C vs SA
TRINITY_DN10323_c0_g1_i3	810.75	13	1.61397e-132	-0.362502	Downregulated	SA-C vs SA
TRINITY_DN1033_c0_g2_i2	4	39317	1.10787e-132	0.779214	Upregulated	SA-C vs SA
TRINITY_DN1044_c0_g1_i5	159511	278	0	-0.552635	Downregulated	SA-C vs SA
TRINITY_DN105_c0_g1_i4	1137	2058.22	3.82527e-40	0.0424371	Upregulated	SA-C vs SA
TRINITY_DN105_c9_g1_i1	18	12295	3.59226e-71	0.550758	Upregulated	SA-C vs SA
TRINITY_DN10531_c0_g1_i2	1218.03	1	2.75448e-150	-0.617126	Downregulated	SA-C vs SA
TRINITY_DN10531_c0_g3_i1	22750	7	1.11855e-277	-0.70121	Downregulated	SA-C vs SA
TRINITY_DN1058_c0_g1_i1	1	3939	2.66252e-53	0.700869	Upregulated	SA-C vs SA
TRINITY_DN106_c0_g1_i5	14	51.66	0.00122165	0.103453	Upregulated	SA-C vs SA
TRINITY_DN106_c0_g1_i8	10	1211.67	2.64428e-14	0.402591	Upregulated	SA-C vs SA
TRINITY_DN106_c0_g2_i1	29	30306.2	8.19161e-98	0.58719	Upregulated	SA-C vs SA
TRINITY_DN106_c0_g2_i3	7	5511.52	3.12584e-54	0.562933	Upregulated	SA-C vs SA
TRINITY_DN10628_c0_g1_i1	265.83	1	5.15689e-83	-0.486718	Downregulated	SA-C vs SA
TRINITY_DN10628_c1_g1_i1	3098	2	5.32028e-191	-0.63772	Downregulated	SA-C vs SA
TRINITY_DN1067_c0_g1_i3	116.88	128	2.09288e-34	-0.000620202	Downregulated	SA-C vs SA
TRINITY_DN1069_c0_g1_i1	298.15	2	3.85323e-88	-0.437163	Downregulated	SA-C vs SA
TRINITY_DN1069_c0_g2_i1	583	1	5.98818e-118	-0.554001	Downregulated	SA-C vs SA
TRINITY_DN107_c0_g3_i1	6	1329	3.70713e-19	0.454274	Upregulated	SA-C vs SA
TRINITY_DN10775_c0_g1_i1	5	1324.48	4.47556e-20	0.469603	Upregulated	SA-C vs SA
TRINITY_DN10869_c0_g1_i1	1	195	0.000158383	0.443357	Upregulated	SA-C vs SA
TRINITY_DN1090_c0_g1_i1	15732.9	18.02	1.17339e-261	-0.5886	Downregulated	SA-C vs SA
TRINITY_DN1090_c0_g1_i3	11003.1	16.98	4.0326e-246	-0.563057	Downregulated	SA-C vs SA
TRINITY_DN10914_c0_g4_i1	17	12627	4.78717e-73	0.557938	Upregulated	SA-C vs SA
TRINITY_DN10932_c2_g1_i2	10875.7	4	1.29775e-245	-0.685924	Downregulated	SA-C vs SA
TRINITY_DN110_c0_g1_i2	793.93	1	1.51562e-131	-0.580458	Downregulated	SA-C vs SA
TRINITY_DN11120_c2_g1_i1	1	1129	4.97991e-23	0.59381	Upregulated	SA-C vs SA
TRINITY_DN11143_c0_g1_i1	14	153	0.424326	0.196475	Nonsignificant	SA-C vs SA
TRINITY_DN1115_c0_g1_i2	1062	4	2.65733e-144	-0.486611	Downregulated	SA-C vs SA
TRINITY_DN11152_c0_g1_i9	22.06	1	8.24314e-11	-0.273465	Downregulated	SA-C vs SA
TRINITY_DN112_c0_g1_i1	1893.34	1	1.53087e-169	-0.654918	Downregulated	SA-C vs SA
TRINITY_DN112_c0_g1_i5	2289.93	1	7.72552e-178	-0.671212	Downregulated	SA-C vs SA
TRINITY_DN112_c0_g1_i9	24.68	1	5.64977e-12	-0.28308	Downregulated	SA-C vs SA
TRINITY_DN113_c0_g2_i2	88	51822	1.77697e-91	0.538048	Upregulated	SA-C vs SA
TRINITY_DN113_c0_g3_i5	5602.99	7.88	8.7376e-217	-0.571011	Downregulated	SA-C vs SA
TRINITY_DN113_c0_g3_i6	181.25	0.12	9.57523e-66	-0.635559	Downregulated	SA-C vs SA
TRINITY_DN1135_c0_g1_i1	25	20	1.9438e-12	-0.0275244	Downregulated	SA-C vs SA
TRINITY_DN11398_c0_g1_i2	4170.19	2	6.18502e-204	-0.663183	Downregulated	SA-C vs SA
TRINITY_DN114_c0_g1_i5	7274.94	2	3.90844e-228	-0.710859	Downregulated	SA-C vs SA
TRINITY_DN11408_c1_g1_i1	51	421	0.0100801	0.172437	Upregulated	SA-C vs SA
TRINITY_DN1145_c0_g2_i3	2701	5	4.91869e-185	-0.547468	Downregulated	SA-C vs SA
TRINITY_DN1147_c0_g1_i1	1764	1	1.83969e-166	-0.648856	Downregulated	SA-C vs SA
TRINITY_DN115_c0_g2_i3	1	305.62	4.27364e-07	0.481855	Upregulated	SA-C vs SA
TRINITY_DN11549_c0_g2_i1	690.5	1	2.27571e-125	-0.568499	Downregulated	SA-C vs SA
TRINITY_DN11567_c0_g2_i1	1	3196	4.37153e-47	0.682961	Upregulated	SA-C vs SA
TRINITY_DN11580_c0_g1_i1	16	1670	5.81167e-16	0.38981	Upregulated	SA-C vs SA
TRINITY_DN116_c0_g1_i11	3.85	2760.75	8.62463e-38	0.554922	Upregulated	SA-C vs SA
TRINITY_DN116_c0_g1_i13	4.15	10759.2	1.23287e-81	0.665034	Upregulated	SA-C vs SA
TRINITY_DN11600_c0_g1_i1	11	932	4.82641e-10	0.371942	Upregulated	SA-C vs SA
TRINITY_DN11616_c0_g1_i1	16	1	3.94049e-08	-0.245948	Downregulated	SA-C vs SA
TRINITY_DN11637_c0_g2_i1	13	414	0.0111144	0.288107	Upregulated	SA-C vs SA
TRINITY_DN11656_c0_g1_i1	3314	6	6.14303e-194	-0.549371	Downregulated	SA-C vs SA
TRINITY_DN11667_c0_g3_i1	3.05	28741.4	2.82965e-121	0.775601	Upregulated	SA-C vs SA
TRINITY_DN11667_c0_g3_i2	28.95	32746.6	5.76428e-101	0.593973	Upregulated	SA-C vs SA
TRINITY_DN1176_c0_g1_i1	7	2617	1.21059e-32	0.499121	Upregulated	SA-C vs SA
TRINITY_DN1177_c0_g1_i2	1	2709.8	1.43047e-42	0.668822	Upregulated	SA-C vs SA
TRINITY_DN1177_c0_g1_i6	16	292.37	0.523505	0.240516	Nonsignificant	SA-C vs SA
TRINITY_DN11902_c0_g2_i1	14	2	2.27396e-07	-0.175122	Downregulated	SA-C vs SA
TRINITY_DN1194_c2_g5_i1	1	1363	1.69686e-26	0.609948	Upregulated	SA-C vs SA
TRINITY_DN11980_c0_g1_i1	1	11108	9.01414e-88	0.789692	Upregulated	SA-C vs SA
TRINITY_DN12_c0_g2_i1	14	11335	7.41227e-72	0.565324	Upregulated	SA-C vs SA
TRINITY_DN12_c0_g5_i1	18	14176	2.07885e-76	0.562954	Upregulated	SA-C vs SA
TRINITY_DN12_c4_g1_i1	51	26702	6.65715e-80	0.527976	Upregulated	SA-C vs SA
TRINITY_DN12015_c0_g1_i1	42281.3	1.42	1.33962e-304	-0.890982	Downregulated	SA-C vs SA
TRINITY_DN12015_c0_g1_i2	54.45	0.58	6.51625e-24	-0.397543	Downregulated	SA-C vs SA
TRINITY_DN121_c1_g1_i3	844.63	5.47573e+06	9.75518e-206	0.743557	Upregulated	SA-C vs SA
TRINITY_DN1213_c2_g1_i1	1	131	0.00408027	0.409276	Upregulated	SA-C vs SA
TRINITY_DN122_c1_g1_i2	1	1353	2.32372e-26	0.609317	Upregulated	SA-C vs SA
TRINITY_DN12202_c0_g1_i1	5	36716	1.65073e-128	0.754232	Upregulated	SA-C vs SA
TRINITY_DN12206_c0_g1_i2	5	22.48	0.11103	0.120379	Nonsignificant	SA-C vs SA
TRINITY_DN123_c0_g1_i1	1	17623	4.20417e-105	0.829234	Upregulated	SA-C vs SA
TRINITY_DN124_c0_g1_i18	50.96	57147.7	8.33714e-111	0.593233	Upregulated	SA-C vs SA
TRINITY_DN124_c0_g1_i2	2.71	21950.8	1.71657e-110	0.762635	Upregulated	SA-C vs SA
TRINITY_DN124_c0_g1_i28	13.35	50588.2	1.42119e-132	0.697552	Upregulated	SA-C vs SA
TRINITY_DN124_c0_g1_i5	61.98	39843.4	7.28292e-91	0.545559	Upregulated	SA-C vs SA
TRINITY_DN124_c1_g1_i1	3	23252	7.4036e-113	0.758859	Upregulated	SA-C vs SA
TRINITY_DN12401_c0_g3_i1	44	15291	2.65138e-62	0.492863	Upregulated	SA-C vs SA
TRINITY_DN1244_c0_g2_i1	32	16014	8.41758e-71	0.524105	Upregulated	SA-C vs SA
TRINITY_DN1244_c1_g1_i1	1	7491	9.71596e-74	0.755939	Upregulated	SA-C vs SA
TRINITY_DN12487_c0_g1_i1	18444	4	1.46009e-268	-0.731178	Downregulated	SA-C vs SA
TRINITY_DN125_c0_g1_i12	23233.4	2	1.37003e-278	-0.810341	Downregulated	SA-C vs SA
TRINITY_DN126_c1_g1_i1	175	2	2.85272e-64	-0.391514	Downregulated	SA-C vs SA
TRINITY_DN12600_c0_g6_i1	29	30662	2.72751e-98	0.58819	Upregulated	SA-C vs SA
TRINITY_DN12603_c0_g1_i2	320.57	0.9	1.96687e-91	-0.511786	Downregulated	SA-C vs SA
TRINITY_DN12603_c0_g1_i4	4709.43	0.61	3.19722e-209	-0.775336	Downregulated	SA-C vs SA
TRINITY_DN1261_c0_g1_i1	5	5147	9.61976e-55	0.585898	Upregulated	SA-C vs SA
TRINITY_DN1262_c0_g1_i1	11	44510	2.78006e-129	0.703173	Upregulated	SA-C vs SA
TRINITY_DN1262_c0_g2_i1	2	29367	6.35314e-124	0.8136	Upregulated	SA-C vs SA
TRINITY_DN1262_c0_g3_i1	17	28975	1.43805e-105	0.629099	Upregulated	SA-C vs SA
TRINITY_DN1262_c0_g5_i1	47	48717	2.34579e-106	0.586489	Upregulated	SA-C vs SA
TRINITY_DN1262_c0_g6_i1	1	3203	3.66416e-47	0.683148	Upregulated	SA-C vs SA
TRINITY_DN1262_c0_g7_i1	1	5567	6.41272e-64	0.730507	Upregulated	SA-C vs SA
TRINITY_DN1262_c0_g8_i1	781	5837476	7.7803e-212	0.755749	Upregulated	SA-C vs SA
TRINITY_DN1262_c11_g1_i1	3	11393	3.35169e-85	0.697739	Upregulated	SA-C vs SA
TRINITY_DN1263_c0_g1_i1	1	248	6.1327e-06	0.463956	Upregulated	SA-C vs SA
TRINITY_DN1264_c0_g2_i1	2536	4	2.72967e-182	-0.561186	Downregulated	SA-C vs SA
TRINITY_DN12676_c0_g2_i1	622.1	1	8.06549e-121	-0.559562	Downregulated	SA-C vs SA
TRINITY_DN12680_c0_g3_i1	5	2368	1.87101e-32	0.519382	Upregulated	SA-C vs SA
TRINITY_DN127_c0_g3_i2	7.65	4585.4	3.71443e-47	0.539564	Upregulated	SA-C vs SA
TRINITY_DN127_c0_g3_i3	22.35	2550	7.67485e-21	0.397438	Upregulated	SA-C vs SA
TRINITY_DN127_c0_g6_i1	1	1745	7.3096e-32	0.631115	Upregulated	SA-C vs SA
TRINITY_DN1278_c0_g1_i1	36	180	5.78214e-05	0.129482	Upregulated	SA-C vs SA
TRINITY_DN128_c2_g1_i1	92	3	1.71244e-38	-0.301687	Downregulated	SA-C vs SA
TRINITY_DN129_c0_g2_i1	35549.2	3	4.57194e-297	-0.812043	Downregulated	SA-C vs SA
TRINITY_DN1292_c0_g2_i1	724	1	1.74386e-127	-0.572558	Downregulated	SA-C vs SA
TRINITY_DN1296_c0_g1_i1	1	5847	1.05098e-65	0.734711	Upregulated	SA-C vs SA
TRINITY_DN13_c0_g3_i2	18	22783.5	6.42608e-95	0.603606	Upregulated	SA-C vs SA
TRINITY_DN13_c0_g4_i2	0.09	1442.56	1.50195e-31	0.821108	Upregulated	SA-C vs SA
TRINITY_DN13_c0_g4_i3	0.91	529.44	6.36484e-12	0.537011	Upregulated	SA-C vs SA
TRINITY_DN13_c0_g5_i1	7	6869	1.81495e-61	0.581797	Upregulated	SA-C vs SA
TRINITY_DN13_c0_g6_i1	5	5127	1.37052e-54	0.585564	Upregulated	SA-C vs SA
TRINITY_DN13_c1_g4_i1	18	8040	5.69463e-56	0.514366	Upregulated	SA-C vs SA
TRINITY_DN1304_c0_g1_i3	19	3	1.29729e-09	-0.166548	Downregulated	SA-C vs SA
TRINITY_DN13047_c0_g1_i1	13	5484.27	7.68972e-48	0.509472	Upregulated	SA-C vs SA
TRINITY_DN13095_c0_g1_i1	1	2906	2.13262e-44	0.674811	Upregulated	SA-C vs SA
TRINITY_DN1310_c0_g1_i2	10	8187	4.23031e-64	0.566277	Upregulated	SA-C vs SA
TRINITY_DN1320_c0_g1_i1	2322.4	2	1.90298e-178	-0.613033	Downregulated	SA-C vs SA
TRINITY_DN1323_c0_g1_i1	23	98108.6	1.09241e-151	0.707694	Upregulated	SA-C vs SA
TRINITY_DN1323_c0_g3_i1	17	1459.39	4.06738e-13	0.373066	Upregulated	SA-C vs SA
TRINITY_DN1323_c4_g1_i1	16	5545	2.01292e-45	0.492626	Upregulated	SA-C vs SA
TRINITY_DN1325_c0_g2_i1	9	26024	1.8925e-109	0.674384	Upregulated	SA-C vs SA
TRINITY_DN1326_c0_g1_i2	2	3765	6.23278e-50	0.637613	Upregulated	SA-C vs SA
TRINITY_DN1326_c1_g2_i1	8	8941.25	1.68425e-69	0.592945	Upregulated	SA-C vs SA
TRINITY_DN133_c0_g1_i4	26	3.02	1.17118e-12	-0.192851	Downregulated	SA-C vs SA
TRINITY_DN133_c0_g2_i3	13	4487	1.06246e-41	0.492277	Upregulated	SA-C vs SA
TRINITY_DN1342_c0_g1_i3	402.4	6	1.56914e-101	-0.368729	Downregulated	SA-C vs SA
TRINITY_DN1344_c0_g1_i1	4383.85	1	4.12109e-206	-0.72685	Downregulated	SA-C vs SA
TRINITY_DN135_c0_g1_i14	15358.1	997	1.515e-172	-0.242698	Downregulated	SA-C vs SA
TRINITY_DN135_c4_g1_i3	339	1	7.07188e-94	-0.507549	Downregulated	SA-C vs SA
TRINITY_DN13536_c0_g1_i1	29	34	4.72798e-12	0.00522131	Upregulated	SA-C vs SA
TRINITY_DN13582_c0_g1_i1	14	818	3.52213e-07	0.340103	Upregulated	SA-C vs SA
TRINITY_DN13613_c0_g2_i3	1	1897.88	7.72078e-34	0.63831	Upregulated	SA-C vs SA
TRINITY_DN13613_c1_g1_i2	5	21610	3.28282e-107	0.708819	Upregulated	SA-C vs SA
TRINITY_DN1367_c1_g1_i8	646.9	4.69	1.52069e-122	-0.430506	Downregulated	SA-C vs SA
TRINITY_DN1377_c0_g1_i11	248.76	0.35	4.87294e-80	-0.570975	Downregulated	SA-C vs SA
TRINITY_DN1377_c0_g1_i5	8466.21	2.65	1.00449e-234	-0.699742	Downregulated	SA-C vs SA
TRINITY_DN1380_c0_g1_i3	1010.48	6	4.21944e-142	-0.447613	Downregulated	SA-C vs SA
TRINITY_DN13829_c1_g3_i3	9928.66	5	1.18227e-241	-0.659	Downregulated	SA-C vs SA
TRINITY_DN14_c1_g1_i11	92.89	34013.5	3.94119e-73	0.497341	Upregulated	SA-C vs SA
TRINITY_DN14_c1_g1_i3	63.11	68764.5	7.32196e-113	0.590767	Upregulated	SA-C vs SA
TRINITY_DN14_c1_g1_i4	14	2739	1.71805e-27	0.44364	Upregulated	SA-C vs SA
TRINITY_DN14_c1_g1_i8	1	13490	4.37016e-95	0.806337	Upregulated	SA-C vs SA
TRINITY_DN14_c1_g3_i1	11	6489	2.91208e-55	0.538197	Upregulated	SA-C vs SA
TRINITY_DN14_c1_g5_i1	1	16336	2.13189e-102	0.822737	Upregulated	SA-C vs SA
TRINITY_DN1404_c0_g1_i1	17	19	5.82615e-08	0.0011227	Upregulated	SA-C vs SA
TRINITY_DN14049_c0_g2_i1	12	2	2.47519e-06	-0.161915	Downregulated	SA-C vs SA
TRINITY_DN141_c0_g3_i2	11	747.55	1.30234e-07	0.353048	Upregulated	SA-C vs SA
TRINITY_DN141_c1_g1_i1	18	15936	5.93843e-81	0.572981	Upregulated	SA-C vs SA
TRINITY_DN141_c1_g2_i1	1	14295.1	2.11037e-97	0.811304	Upregulated	SA-C vs SA
TRINITY_DN141_c1_g8_i1	21	5965	7.43069e-44	0.475584	Upregulated	SA-C vs SA
TRINITY_DN14192_c0_g2_i1	2299	3	5.17499e-178	-0.577427	Downregulated	SA-C vs SA
TRINITY_DN142_c0_g2_i1	26	78699	6.42252e-140	0.678303	Upregulated	SA-C vs SA
TRINITY_DN14395_c1_g1_i1	307.37	2.5	1.70323e-89	-0.420654	Downregulated	SA-C vs SA
TRINITY_DN14395_c1_g1_i4	4945.63	2.5	2.34052e-211	-0.658677	Downregulated	SA-C vs SA
TRINITY_DN146_c0_g2_i3	7.09	480.54	9.40606e-06	0.352818	Upregulated	SA-C vs SA
TRINITY_DN146_c1_g4_i1	24	12853	6.02976e-68	0.529913	Upregulated	SA-C vs SA
TRINITY_DN1461_c0_g1_i1	916	3	7.97442e-138	-0.498588	Downregulated	SA-C vs SA
TRINITY_DN1461_c1_g1_i2	6060.57	23	3.29462e-220	-0.485964	Downregulated	SA-C vs SA
TRINITY_DN1461_c3_g1_i1	156	1	3.23559e-59	-0.441053	Downregulated	SA-C vs SA
TRINITY_DN1467_c0_g2_i1	4598	2	3.48786e-208	-0.67155	Downregulated	SA-C vs SA
TRINITY_DN147_c0_g2_i2	96	35	4.72071e-42	-0.0948526	Downregulated	SA-C vs SA
TRINITY_DN147_c0_g3_i1	55	1	2.93906e-24	-0.351735	Downregulated	SA-C vs SA
TRINITY_DN1479_c0_g1_i1	14	1170	1.76146e-11	0.370765	Upregulated	SA-C vs SA
TRINITY_DN149_c1_g3_i2	24	31.53	6.06227e-10	0.0149729	Upregulated	SA-C vs SA
TRINITY_DN1496_c0_g1_i1	47	12339	3.75836e-53	0.468835	Upregulated	SA-C vs SA
TRINITY_DN1497_c0_g1_i3	444	1	6.77868e-106	-0.530666	Downregulated	SA-C vs SA
TRINITY_DN1497_c1_g1_i4	279.81	1	2.43673e-85	-0.491109	Downregulated	SA-C vs SA
TRINITY_DN150_c0_g2_i6	1	523.65	8.11889e-12	0.527989	Upregulated	SA-C vs SA
TRINITY_DN150_c1_g1_i1	9	5265	1.65152e-50	0.537481	Upregulated	SA-C vs SA
TRINITY_DN15005_c0_g1_i1	15	438	0.0185918	0.280675	Upregulated	SA-C vs SA
TRINITY_DN1501_c0_g5_i1	28	6028	9.69198e-40	0.451836	Upregulated	SA-C vs SA
TRINITY_DN1501_c0_g6_i1	1	20094	1.89231e-110	0.840476	Upregulated	SA-C vs SA
TRINITY_DN1501_c1_g1_i1	1	447	4.73304e-10	0.51443	Upregulated	SA-C vs SA
TRINITY_DN15036_c0_g1_i2	14	17	2.1476e-06	0.00822775	Upregulated	SA-C vs SA
TRINITY_DN1513_c0_g1_i1	43	29683	2.52287e-88	0.551662	Upregulated	SA-C vs SA
TRINITY_DN152_c0_g1_i1	67046	7	0	-0.793808	Downregulated	SA-C vs SA
TRINITY_DN1535_c0_g2_i1	11	8877	8.12969e-66	0.565044	Upregulated	SA-C vs SA
TRINITY_DN1550_c0_g1_i5	37	12	3.67317e-18	-0.104878	Downregulated	SA-C vs SA
TRINITY_DN1559_c0_g2_i1	1157	1	4.85645e-148	-0.612722	Downregulated	SA-C vs SA
TRINITY_DN1559_c0_g3_i1	1540	1	1.53409e-160	-0.637221	Downregulated	SA-C vs SA
TRINITY_DN156_c0_g3_i1	20.11	84188.4	9.77757e-148	0.706088	Upregulated	SA-C vs SA
TRINITY_DN156_c0_g3_i2	12.89	10116.9	1.6531e-68	0.562661	Upregulated	SA-C vs SA
TRINITY_DN156_c0_g3_i3	38	5337.73	4.86755e-31	0.415254	Upregulated	SA-C vs SA
TRINITY_DN156_c0_g5_i1	3	57348.4	5.65466e-150	0.836202	Upregulated	SA-C vs SA
TRINITY_DN15628_c0_g1_i2	21	1	2.45934e-10	-0.269246	Downregulated	SA-C vs SA
TRINITY_DN157_c0_g2_i3	3378.35	5	8.99409e-195	-0.566639	Downregulated	SA-C vs SA
TRINITY_DN157_c1_g1_i2	993.89	1	2.15955e-141	-0.599703	Downregulated	SA-C vs SA
TRINITY_DN1577_c0_g1_i1	28	5	1.49345e-13	-0.156005	Downregulated	SA-C vs SA
TRINITY_DN1590_c0_g2_i1	733	14	4.38615e-128	-0.347516	Downregulated	SA-C vs SA
TRINITY_DN1591_c0_g1_i1	1311	10	1.58606e-153	-0.426154	Downregulated	SA-C vs SA
TRINITY_DN1591_c0_g1_i2	47	2	3.16535e-21	-0.278882	Downregulated	SA-C vs SA
TRINITY_DN1593_c0_g4_i1	1	19765	8.93113e-110	0.839062	Upregulated	SA-C vs SA
TRINITY_DN1593_c0_g6_i1	64	9145	1.46919e-36	0.416719	Upregulated	SA-C vs SA
TRINITY_DN1593_c1_g1_i2	1	1817	1.17586e-32	0.634579	Upregulated	SA-C vs SA
TRINITY_DN1594_c0_g3_i1	2	2750	6.59458e-41	0.610699	Upregulated	SA-C vs SA
TRINITY_DN161_c0_g1_i1	151540	40	0	-0.714345	Downregulated	SA-C vs SA
TRINITY_DN16156_c0_g1_i1	538	1	2.09403e-114	-0.547119	Downregulated	SA-C vs SA
TRINITY_DN16206_c0_g1_i1	25	198	0.0383951	0.168888	Upregulated	SA-C vs SA
TRINITY_DN163_c0_g1_i3	27	67.67	1.65417e-07	0.0703121	Upregulated	SA-C vs SA
TRINITY_DN1630_c0_g2_i1	67	63634	7.25921e-108	0.578999	Upregulated	SA-C vs SA
TRINITY_DN1646_c0_g1_i4	218923	246	0	-0.590238	Downregulated	SA-C vs SA
TRINITY_DN1646_c1_g1_i2	4176	4	5.35252e-204	-0.603917	Downregulated	SA-C vs SA
TRINITY_DN1649_c0_g1_i2	8	47.09	0.0790364	0.143463	Nonsignificant	SA-C vs SA
TRINITY_DN16492_c0_g1_i1	6	26	0.0654974	0.117222	Nonsignificant	SA-C vs SA
TRINITY_DN1650_c0_g1_i1	156	140432	3.92764e-114	0.574408	Upregulated	SA-C vs SA
TRINITY_DN1650_c0_g2_i1	8	2748	9.01912e-33	0.491866	Upregulated	SA-C vs SA
TRINITY_DN1653_c0_g2_i2	19.84	15.71	5.03731e-10	-0.0284033	Downregulated	SA-C vs SA
TRINITY_DN1663_c0_g1_i1	24	48	4.26378e-08	0.0509788	Upregulated	SA-C vs SA
TRINITY_DN170_c1_g1_i1	81359.9	34	0	-0.674982	Downregulated	SA-C vs SA
TRINITY_DN172_c0_g1_i7	329.33	3	1.39021e-92	-0.410946	Downregulated	SA-C vs SA
TRINITY_DN172_c0_g1_i9	185.49	1	1.00941e-66	-0.455887	Downregulated	SA-C vs SA
TRINITY_DN1721_c0_g2_i1	2091	1	7.07141e-174	-0.663426	Downregulated	SA-C vs SA
TRINITY_DN17219_c0_g1_i1	13	5651	1.25487e-48	0.512038	Upregulated	SA-C vs SA
TRINITY_DN173_c0_g2_i1	4	42633	4.39066e-136	0.786151	Upregulated	SA-C vs SA
TRINITY_DN1746_c0_g1_i1	64	17912	4.1253e-59	0.474316	Upregulated	SA-C vs SA
TRINITY_DN1760_c0_g1_i3	1661.87	1	7.2288e-164	-0.643746	Downregulated	SA-C vs SA
TRINITY_DN17610_c0_g1_i3	353.85	1	8.49736e-96	-0.511222	Downregulated	SA-C vs SA
TRINITY_DN1792_c0_g1_i1	88	24136	9.97888e-62	0.472583	Upregulated	SA-C vs SA
TRINITY_DN1796_c0_g1_i2	41.63	1	5.99836e-19	-0.327873	Downregulated	SA-C vs SA
TRINITY_DN1799_c1_g1_i4	244.27	1	3.95832e-79	-0.479471	Downregulated	SA-C vs SA
TRINITY_DN1799_c2_g2_i1	2548	1	1.71489e-182	-0.680361	Downregulated	SA-C vs SA
TRINITY_DN180_c0_g1_i1	7977	5	3.85484e-232	-0.640249	Downregulated	SA-C vs SA
TRINITY_DN1801_c0_g1_i1	16278	1	3.91031e-263	-0.839245	Downregulated	SA-C vs SA
TRINITY_DN1837_c0_g2_i1	2756.54	15.9	6.10065e-186	-0.450096	Downregulated	SA-C vs SA
TRINITY_DN1837_c0_g2_i2	1779.76	2.1	7.44082e-167	-0.586053	Downregulated	SA-C vs SA
TRINITY_DN1867_c0_g2_i1	6925.34	1	5.42565e-226	-0.766025	Downregulated	SA-C vs SA
TRINITY_DN187_c1_g2_i1	119	1	6.67413e-48	-0.417858	Downregulated	SA-C vs SA
TRINITY_DN19_c9_g1_i1	2268	3	2.03441e-177	-0.576264	Downregulated	SA-C vs SA
TRINITY_DN191_c0_g2_i1	26393	13	3.94185e-284	-0.660899	Downregulated	SA-C vs SA
TRINITY_DN1917_c0_g1_i1	1	1346	3.185e-26	0.608872	Upregulated	SA-C vs SA
TRINITY_DN192_c0_g1_i19	573.05	1	3.43315e-117	-0.552526	Downregulated	SA-C vs SA
TRINITY_DN1922_c0_g2_i1	2469.87	6	3.83958e-181	-0.524184	Downregulated	SA-C vs SA
TRINITY_DN1922_c0_g4_i1	3333	3	3.47933e-194	-0.609246	Downregulated	SA-C vs SA
TRINITY_DN193_c0_g1_i3	76.43	1	3.00607e-32	-0.379925	Downregulated	SA-C vs SA
TRINITY_DN193_c0_g1_i4	304.78	1	3.76331e-89	-0.498432	Downregulated	SA-C vs SA
TRINITY_DN194_c1_g1_i1	25	5625	2.00804e-39	0.455618	Upregulated	SA-C vs SA
TRINITY_DN194_c1_g2_i5	17	2295.61	1.53827e-21	0.411875	Upregulated	SA-C vs SA
TRINITY_DN1944_c0_g1_i1	5	2241	3.5623e-31	0.51466	Upregulated	SA-C vs SA
TRINITY_DN1948_c0_g1_i3	14.47	5.2	1.26331e-07	-0.0960879	Downregulated	SA-C vs SA
TRINITY_DN195_c0_g1_i2	480	2	2.33902e-109	-0.47796	Downregulated	SA-C vs SA
TRINITY_DN1954_c0_g8_i1	10	1335	7.84773e-16	0.410895	Upregulated	SA-C vs SA
TRINITY_DN19861_c0_g1_i1	1	58	0.175453	0.339472	Nonsignificant	SA-C vs SA
TRINITY_DN1988_c0_g1_i1	1918	1	4.07206e-170	-0.656027	Downregulated	SA-C vs SA
TRINITY_DN1990_c0_g1_i2	2517.01	1	5.89028e-182	-0.679312	Downregulated	SA-C vs SA
TRINITY_DN1990_c0_g1_i7	2.87978e+06	6128	0	-0.53553	Downregulated	SA-C vs SA
TRINITY_DN1996_c0_g1_i3	22.44	31.48	5.82975e-09	0.020595	Upregulated	SA-C vs SA
TRINITY_DN1996_c0_g1_i5	28.56	0.52	8.98453e-14	-0.351615	Downregulated	SA-C vs SA
TRINITY_DN1996_c1_g1_i2	53	28	8.82606e-26	-0.0630747	Downregulated	SA-C vs SA
TRINITY_DN2_c0_g1_i1	6185.57	2	4.38691e-221	-0.696961	Downregulated	SA-C vs SA
TRINITY_DN2_c0_g5_i1	41615.4	4	6.55047e-304	-0.800894	Downregulated	SA-C vs SA
TRINITY_DN20118_c0_g3_i2	1	10676	1.34113e-86	0.786293	Upregulated	SA-C vs SA
TRINITY_DN2020_c0_g1_i3	17	2	1.24618e-08	-0.191757	Downregulated	SA-C vs SA
TRINITY_DN2025_c0_g2_i1	50230	27	4.39128142482e-312	-0.653413	Downregulated	SA-C vs SA
TRINITY_DN2027_c0_g1_i2	16.51	18	9.70402e-08	-0.00100377	Downregulated	SA-C vs SA
TRINITY_DN20307_c0_g2_i1	34	15132	2.07364e-67	0.514057	Upregulated	SA-C vs SA
TRINITY_DN2042_c0_g1_i3	1316.65	4	1.0207e-153	-0.505026	Downregulated	SA-C vs SA
TRINITY_DN2045_c0_g2_i1	2595	1	2.75669e-183	-0.681927	Downregulated	SA-C vs SA
TRINITY_DN205_c0_g1_i1	1	266	2.69963e-06	0.469959	Upregulated	SA-C vs SA
TRINITY_DN205_c0_g3_i1	21	1179.96	1.69018e-08	0.336753	Upregulated	SA-C vs SA
TRINITY_DN2069_c0_g1_i2	3455.8	1	9.19318e-196	-0.70647	Downregulated	SA-C vs SA
TRINITY_DN20825_c0_g5_i1	24	3369	4.75022e-26	0.415198	Upregulated	SA-C vs SA
TRINITY_DN212_c1_g2_i4	15.17	1	1.26331e-07	-0.241384	Downregulated	SA-C vs SA
TRINITY_DN21214_c1_g1_i1	2	1651	1.18555e-28	0.566986	Upregulated	SA-C vs SA
TRINITY_DN2125_c0_g3_i1	17	15676	3.60903e-81	0.576468	Upregulated	SA-C vs SA
TRINITY_DN21296_c0_g5_i1	16	1409	4.72505e-13	0.37525	Upregulated	SA-C vs SA
TRINITY_DN2132_c0_g6_i1	1192	3	2.34806e-149	-0.521152	Downregulated	SA-C vs SA
TRINITY_DN2132_c0_g7_i1	2748	1	8.76503e-186	-0.686835	Downregulated	SA-C vs SA
TRINITY_DN2148_c0_g1_i1	1	15635	1.2363e-100	0.818979	Upregulated	SA-C vs SA
TRINITY_DN215_c0_g1_i3	29	5472	2.86577e-36	0.440539	Upregulated	SA-C vs SA
TRINITY_DN2150_c1_g3_i1	14388	5	8.99981e-258	-0.690783	Downregulated	SA-C vs SA
TRINITY_DN2153_c0_g2_i1	451	1	1.35426e-106	-0.532006	Downregulated	SA-C vs SA
TRINITY_DN217_c0_g2_i1	23	3579	3.98318e-28	0.424025	Upregulated	SA-C vs SA
TRINITY_DN2173_c0_g1_i3	1167.51	2.64	1.83203e-148	-0.530326	Downregulated	SA-C vs SA
TRINITY_DN2173_c0_g1_i6	3324.49	29.36	4.30441e-194	-0.413601	Downregulated	SA-C vs SA
TRINITY_DN21820_c1_g1_i1	16	1	3.94049e-08	-0.245948	Downregulated	SA-C vs SA
TRINITY_DN2186_c0_g1_i1	185	1	1.00941e-66	-0.45566	Downregulated	SA-C vs SA
TRINITY_DN219_c0_g3_i1	7	4170	1.2282e-45	0.539036	Upregulated	SA-C vs SA
TRINITY_DN22_c0_g1_i3	10	7774.43	1.78792e-62	0.561847	Upregulated	SA-C vs SA
TRINITY_DN2202_c0_g1_i4	825.38	1	3.20867e-133	-0.583786	Downregulated	SA-C vs SA
TRINITY_DN222_c0_g1_i5	16	1	3.94049e-08	-0.245948	Downregulated	SA-C vs SA
TRINITY_DN224_c0_g1_i3	50.77	1	1.11358e-22	-0.344878	Downregulated	SA-C vs SA
TRINITY_DN2256_c0_g1_i1	732.27	2	5.64787e-128	-0.514146	Downregulated	SA-C vs SA
TRINITY_DN226_c0_g2_i5	110.68	2	3.95577e-45	-0.352263	Downregulated	SA-C vs SA
TRINITY_DN2270_c0_g1_i1	13104	10	1.03441e-253	-0.623389	Downregulated	SA-C vs SA
TRINITY_DN229_c0_g2_i5	68	4	1.92318e-29	-0.251142	Downregulated	SA-C vs SA
TRINITY_DN2298_c3_g2_i1	2	3713	1.70775e-49	0.636422	Upregulated	SA-C vs SA
TRINITY_DN23_c0_g1_i1	1	692.7	1.78501e-15	0.551959	Upregulated	SA-C vs SA
TRINITY_DN230_c0_g4_i4	18253.5	2	4.11639e-268	-0.789674	Downregulated	SA-C vs SA
TRINITY_DN2301_c0_g1_i1	26	8742	7.14654e-53	0.490033	Upregulated	SA-C vs SA
TRINITY_DN232_c0_g5_i1	1.13	7252.79	6.49408e-73	0.742699	Upregulated	SA-C vs SA
TRINITY_DN232_c0_g5_i2	24.87	11209.2	2.52696e-62	0.515139	Upregulated	SA-C vs SA
TRINITY_DN2344_c0_g3_i1	1635	2	3.79967e-163	-0.582964	Downregulated	SA-C vs SA
TRINITY_DN2348_c0_g1_i2	36.53	10	9.20566e-18	-0.119403	Downregulated	SA-C vs SA
TRINITY_DN238_c0_g2_i2	19	4434.82	1.44512e-36	0.458762	Upregulated	SA-C vs SA
TRINITY_DN2383_c1_g1_i2	2010.54	1	3.52257e-172	-0.660064	Downregulated	SA-C vs SA
TRINITY_DN23890_c0_g1_i1	1	414	2.42167e-09	0.507859	Upregulated	SA-C vs SA
TRINITY_DN240_c0_g2_i10	1237.59	0.85	5.27884e-151	-0.632415	Downregulated	SA-C vs SA
TRINITY_DN240_c0_g2_i5	3941.54	1.15	1.73098e-201	-0.705763	Downregulated	SA-C vs SA
TRINITY_DN241_c0_g1_i5	381.94	2	3.22554e-99	-0.458381	Downregulated	SA-C vs SA
TRINITY_DN24168_c0_g6_i1	46	39101	9.05992e-98	0.569494	Upregulated	SA-C vs SA
TRINITY_DN24351_c0_g1_i1	17	7	3.99443e-09	-0.0844262	Downregulated	SA-C vs SA
TRINITY_DN244_c0_g1_i1	10.64	2.84	4.53786e-06	-0.121567	Downregulated	SA-C vs SA
TRINITY_DN245_c1_g1_i1	41	1361.57	7.11907e-05	0.291698	Upregulated	SA-C vs SA
TRINITY_DN246_c1_g1_i3	24	2	1.63617e-11	-0.221301	Downregulated	SA-C vs SA
TRINITY_DN2473_c0_g2_i4	157.33	1	1.60202e-59	-0.44178	Downregulated	SA-C vs SA
TRINITY_DN2479_c0_g1_i1	111	73	6.59283e-43	-0.0443104	Downregulated	SA-C vs SA
TRINITY_DN2485_c0_g1_i3	12128	2.06	2.39653e-250	-0.752114	Downregulated	SA-C vs SA
TRINITY_DN2485_c0_g1_i8	655.62	0.61	3.81149e-123	-0.606407	Downregulated	SA-C vs SA
TRINITY_DN2485_c0_g1_i9	6611.81	1.33	5.57672e-224	-0.737623	Downregulated	SA-C vs SA
TRINITY_DN25_c0_g1_i10	12	2403.34	5.62344e-26	0.445646	Upregulated	SA-C vs SA
TRINITY_DN25_c0_g1_i11	13.96	3026.59	4.89549e-30	0.452439	Upregulated	SA-C vs SA
TRINITY_DN25_c0_g1_i6	3.04	8203.89	1.37048e-73	0.668469	Upregulated	SA-C vs SA
TRINITY_DN25_c0_g2_i1	2	6353.24	1.57506e-66	0.68244	Upregulated	SA-C vs SA
TRINITY_DN25381_c0_g1_i1	7	4176.19	1.14705e-45	0.539163	Upregulated	SA-C vs SA
TRINITY_DN25381_c0_g3_i2	8	1739.01	2.40035e-22	0.452664	Upregulated	SA-C vs SA
TRINITY_DN2542_c1_g1_i4	1920.6	1	3.50267e-170	-0.656143	Downregulated	SA-C vs SA
TRINITY_DN2546_c0_g1_i1	7551.53	32.8	9.02088e-230	-0.474399	Downregulated	SA-C vs SA
TRINITY_DN2546_c0_g1_i12	12211	2.2	1.21109e-250	-0.747065	Downregulated	SA-C vs SA
TRINITY_DN255_c0_g1_i3	31	147	8.64523e-05	0.124942	Upregulated	SA-C vs SA
TRINITY_DN255_c0_g1_i4	2289	1	7.99606e-178	-0.671177	Downregulated	SA-C vs SA
TRINITY_DN256_c0_g5_i1	17	15057	1.3305e-79	0.573017	Upregulated	SA-C vs SA
TRINITY_DN259_c0_g2_i1	5154	2	3.78898e-213	-0.68133	Downregulated	SA-C vs SA
TRINITY_DN26_c0_g1_i1	21	13612	2.10808e-72	0.546269	Upregulated	SA-C vs SA
TRINITY_DN26_c0_g2_i11	10	3125.82	3.71895e-34	0.483785	Upregulated	SA-C vs SA
TRINITY_DN26_c0_g2_i7	67.98	79972.4	5.02793e-117	0.597335	Upregulated	SA-C vs SA
TRINITY_DN26_c0_g2_i8	1.02	1490.55	1.83935e-28	0.615915	Upregulated	SA-C vs SA
TRINITY_DN260_c0_g1_i1	19346.4	8	1.22798e-270	-0.675885	Downregulated	SA-C vs SA
TRINITY_DN26074_c0_g1_i1	20	12786	5.16319e-71	0.545086	Upregulated	SA-C vs SA
TRINITY_DN2608_c0_g1_i2	610	1	5.84744e-120	-0.557879	Downregulated	SA-C vs SA
TRINITY_DN261_c0_g3_i1	6919.71	6	5.83036e-226	-0.612447	Downregulated	SA-C vs SA
TRINITY_DN2610_c0_g1_i1	834.72	3.52	9.26535e-134	-0.476932	Downregulated	SA-C vs SA
TRINITY_DN2610_c0_g1_i2	99.28	1.48	6.73333e-41	-0.368747	Downregulated	SA-C vs SA
TRINITY_DN26102_c0_g1_i1	23	5745	2.13359e-41	0.46457	Upregulated	SA-C vs SA
TRINITY_DN26136_c0_g1_i1	17	4281	5.68408e-37	0.465267	Upregulated	SA-C vs SA
TRINITY_DN2617_c0_g3_i1	5	721	7.00496e-11	0.417501	Upregulated	SA-C vs SA
TRINITY_DN26179_c0_g1_i1	184	2	1.57663e-66	-0.395811	Downregulated	SA-C vs SA
TRINITY_DN262_c0_g11_i1	1	1672	9.83925e-31	0.627454	Upregulated	SA-C vs SA
TRINITY_DN262_c0_g2_i3	1	3189.12	5.21705e-47	0.682776	Upregulated	SA-C vs SA
TRINITY_DN262_c0_g5_i1	1	7857	1.55134e-75	0.760026	Upregulated	SA-C vs SA
TRINITY_DN262_c0_g7_i1	1	28751	1.66527e-124	0.871169	Upregulated	SA-C vs SA
TRINITY_DN26221_c0_g1_i1	10	1997	1.62563e-23	0.445398	Upregulated	SA-C vs SA
TRINITY_DN26236_c0_g1_i1	1	213	6.4413e-05	0.450922	Upregulated	SA-C vs SA
TRINITY_DN26241_c0_g1_i1	57	15117	7.40978e-56	0.469705	Upregulated	SA-C vs SA
TRINITY_DN26284_c0_g1_i1	1	3964	1.69759e-53	0.701411	Upregulated	SA-C vs SA
TRINITY_DN26343_c0_g1_i1	25	1826	3.6952e-13	0.359225	Upregulated	SA-C vs SA
TRINITY_DN26370_c0_g1_i4	11	353.12	0.018725	0.288792	Upregulated	SA-C vs SA
TRINITY_DN2638_c0_g1_i1	23	5598	1.40087e-40	0.462349	Upregulated	SA-C vs SA
TRINITY_DN26456_c0_g1_i1	1	5337	9.10808e-63	0.726892	Upregulated	SA-C vs SA
TRINITY_DN26557_c0_g1_i1	18	1	7.04361e-09	-0.256039	Downregulated	SA-C vs SA
TRINITY_DN26605_c0_g1_i1	1	7519	7.14399e-74	0.756259	Upregulated	SA-C vs SA
TRINITY_DN2666_c0_g1_i2	4493.16	11	3.48608e-207	-0.52352	Downregulated	SA-C vs SA
TRINITY_DN26683_c0_g1_i1	4	4582	1.37621e-52	0.595053	Upregulated	SA-C vs SA
TRINITY_DN26739_c0_g1_i1	10	6929	2.59965e-58	0.551984	Upregulated	SA-C vs SA
TRINITY_DN2674_c1_g2_i1	751.65	1	3.75284e-129	-0.575769	Downregulated	SA-C vs SA
TRINITY_DN2682_c0_g1_i2	13	1.32	7.44748e-07	-0.204372	Downregulated	SA-C vs SA
TRINITY_DN2694_c0_g1_i1	456.69	1	3.5046e-107	-0.53308	Downregulated	SA-C vs SA
TRINITY_DN26969_c0_g1_i1	774	2464	4.21269e-23	0.0908024	Upregulated	SA-C vs SA
TRINITY_DN270_c0_g1_i2	1350	3	8.48276e-155	-0.531816	Downregulated	SA-C vs SA
TRINITY_DN272_c0_g1_i2	15088.6	3	7.72743e-260	-0.738622	Downregulated	SA-C vs SA
TRINITY_DN274_c0_g2_i1	8462	2	1.05224e-234	-0.723809	Downregulated	SA-C vs SA
TRINITY_DN275_c0_g1_i6	1448.41	1	7.5748e-158	-0.631968	Downregulated	SA-C vs SA
TRINITY_DN27518_c0_g1_i1	1	18	1	0.239226	Nonsignificant	SA-C vs SA
TRINITY_DN2758_c0_g2_i1	1067	2	1.70126e-144	-0.546399	Downregulated	SA-C vs SA
TRINITY_DN276_c0_g1_i3	443.15	1.9	8.62445e-106	-0.475511	Downregulated	SA-C vs SA
TRINITY_DN276_c0_g1_i6	388.37	9.2	5.67247e-100	-0.329067	Downregulated	SA-C vs SA
TRINITY_DN276_c0_g1_i7	3344.51	1.9	2.42379e-194	-0.648675	Downregulated	SA-C vs SA
TRINITY_DN277_c0_g1_i3	2357.67	2	4.08854e-179	-0.614324	Downregulated	SA-C vs SA
TRINITY_DN2777_c0_g1_i3	655.01	1	4.48089e-123	-0.563979	Downregulated	SA-C vs SA
TRINITY_DN2778_c0_g1_i2	15	11.8	1.75007e-07	-0.0289643	Downregulated	SA-C vs SA
TRINITY_DN278_c1_g1_i6	16.96	1.24	2.21221e-08	-0.23251	Downregulated	SA-C vs SA
TRINITY_DN28_c0_g1_i1	86	5883.29	6.96239e-19	0.353615	Upregulated	SA-C vs SA
TRINITY_DN280_c0_g2_i2	248.89	2	4.36954e-80	-0.421691	Downregulated	SA-C vs SA
TRINITY_DN281_c1_g1_i2	2565.1	2	8.79603e-183	-0.621549	Downregulated	SA-C vs SA
TRINITY_DN28812_c0_g1_i1	14	4	1.26331e-07	-0.115737	Downregulated	SA-C vs SA
TRINITY_DN289_c0_g1_i1	24	13544.7	6.2738e-70	0.534404	Upregulated	SA-C vs SA
TRINITY_DN29_c0_g2_i1	1	12701	1.09457e-92	0.801174	Upregulated	SA-C vs SA
TRINITY_DN292_c0_g1_i16	4185	2	4.32428e-204	-0.663487	Downregulated	SA-C vs SA
TRINITY_DN292_c0_g1_i23	5289.99	1	2.78291e-214	-0.742947	Downregulated	SA-C vs SA
TRINITY_DN292_c0_g1_i4	29565	5	4.63605e-289	-0.752486	Downregulated	SA-C vs SA
TRINITY_DN298_c0_g1_i1	1525.29	4.46	4.08169e-160	-0.508302	Downregulated	SA-C vs SA
TRINITY_DN298_c0_g1_i2	12043.7	21.54	4.75424e-250	-0.55042	Downregulated	SA-C vs SA
TRINITY_DN298_c0_g1_i5	329.8	1	1.18077e-92	-0.505192	Downregulated	SA-C vs SA
TRINITY_DN299_c0_g1_i4	71.23	1	1.69358e-30	-0.373889	Downregulated	SA-C vs SA
TRINITY_DN300_c0_g2_i1	1240	1	4.54879e-151	-0.618658	Downregulated	SA-C vs SA
TRINITY_DN3000_c0_g1_i1	20	17024	7.44777e-82	0.569612	Upregulated	SA-C vs SA
TRINITY_DN303_c0_g1_i7	1672.06	1	3.96913e-164	-0.64427	Downregulated	SA-C vs SA
TRINITY_DN306_c0_g1_i2	17523	2447	1.88888e-142	-0.17707	Downregulated	SA-C vs SA
TRINITY_DN3068_c0_g1_i2	272.44	1	5.08847e-84	-0.488822	Downregulated	SA-C vs SA
TRINITY_DN30925_c0_g1_i1	1	110	0.0155637	0.394307	Upregulated	SA-C vs SA
TRINITY_DN30926_c0_g1_i1	24	3735	9.94105e-29	0.424034	Upregulated	SA-C vs SA
TRINITY_DN30941_c0_g1_i1	39	9963	1.05913e-49	0.466496	Upregulated	SA-C vs SA
TRINITY_DN30952_c0_g1_i1	3	15136	4.16925e-96	0.722077	Upregulated	SA-C vs SA
TRINITY_DN3096_c0_g2_i2	403.35	1	1.37387e-101	-0.52244	Downregulated	SA-C vs SA
TRINITY_DN30971_c0_g1_i1	7	1424	1.7205e-19	0.446983	Upregulated	SA-C vs SA
TRINITY_DN30981_c0_g1_i1	1	10693	1.17943e-86	0.78643	Upregulated	SA-C vs SA
TRINITY_DN310_c0_g1_i1	8887	2	7.80191e-237	-0.728008	Downregulated	SA-C vs SA
TRINITY_DN31002_c0_g1_i1	46	6407	9.7371e-33	0.414528	Upregulated	SA-C vs SA
TRINITY_DN31017_c0_g1_i2	26719.1	10	1.15565e-284	-0.684429	Downregulated	SA-C vs SA
TRINITY_DN31029_c0_g1_i1	11	301	0.0700455	0.27511	Nonsignificant	SA-C vs SA
TRINITY_DN31030_c0_g1_i1	20	31976	5.63082e-107	0.623618	Upregulated	SA-C vs SA
TRINITY_DN31049_c0_g1_i1	4	699	1.32398e-11	0.433964	Upregulated	SA-C vs SA
TRINITY_DN31063_c0_g1_i1	1	1855	3.18705e-33	0.636352	Upregulated	SA-C vs SA
TRINITY_DN311_c0_g1_i1	4615.13	20	2.34158e-208	-0.474595	Downregulated	SA-C vs SA
TRINITY_DN31133_c0_g1_i1	2	447	6.4963e-09	0.455045	Upregulated	SA-C vs SA
TRINITY_DN31185_c0_g1_i2	63	1	2.06637e-27	-0.363369	Downregulated	SA-C vs SA
TRINITY_DN31219_c0_g1_i1	7	5331	4.54829e-53	0.56008	Upregulated	SA-C vs SA
TRINITY_DN31223_c0_g1_i1	19	17080	8.27568e-83	0.574288	Upregulated	SA-C vs SA
TRINITY_DN313_c0_g1_i1	21	1341	4.29881e-10	0.347714	Upregulated	SA-C vs SA
TRINITY_DN31323_c0_g1_i1	28	826	0.00303764	0.281551	Upregulated	SA-C vs SA
TRINITY_DN31352_c0_g1_i1	13	1307	1.20977e-13	0.386601	Upregulated	SA-C vs SA
TRINITY_DN316_c0_g2_i1	7	13732	7.5914e-87	0.641145	Upregulated	SA-C vs SA
TRINITY_DN31653_c0_g1_i2	14	76	0.0181302	0.136528	Upregulated	SA-C vs SA
TRINITY_DN3182_c0_g1_i1	2	17496	2.43303e-103	0.769229	Upregulated	SA-C vs SA
TRINITY_DN32_c0_g3_i2	1	2119.98	2.90646e-36	0.647792	Upregulated	SA-C vs SA
TRINITY_DN32_c0_g5_i1	1	6968	2.05336e-71	0.749738	Upregulated	SA-C vs SA
TRINITY_DN32_c1_g1_i1	1	2414	8.68489e-40	0.658919	Upregulated	SA-C vs SA
TRINITY_DN3220_c0_g2_i2	23082.6	12	2.61053e-278	-0.656274	Downregulated	SA-C vs SA
TRINITY_DN3222_c0_g1_i1	1152	1	7.49411e-148	-0.612351	Downregulated	SA-C vs SA
TRINITY_DN323_c0_g2_i1	626	3	4.26317e-121	-0.465974	Downregulated	SA-C vs SA
TRINITY_DN323_c0_g4_i1	1381.46	1	8.88901e-156	-0.627913	Downregulated	SA-C vs SA
TRINITY_DN3238_c0_g1_i2	17	2.25	1.24618e-08	-0.181666	Downregulated	SA-C vs SA
TRINITY_DN32688_c0_g1_i1	20	15	2.79657e-11	-0.0330537	Downregulated	SA-C vs SA
TRINITY_DN328_c0_g3_i1	132.57	1	1.97375e-52	-0.42711	Downregulated	SA-C vs SA
TRINITY_DN33_c1_g1_i1	7	2318	1.00062e-29	0.488727	Upregulated	SA-C vs SA
TRINITY_DN331_c0_g5_i1	1	5763	3.50624e-65	0.733471	Upregulated	SA-C vs SA
TRINITY_DN332_c0_g3_i4	13	8	1.26331e-07	-0.0500024	Downregulated	SA-C vs SA
TRINITY_DN33240_c0_g1_i1	14	1	4.1078e-07	-0.234508	Downregulated	SA-C vs SA
TRINITY_DN3333_c0_g2_i1	1179	4	7.13407e-149	-0.495565	Downregulated	SA-C vs SA
TRINITY_DN3364_c0_g2_i2	2	23013	7.93398e-114	0.792712	Upregulated	SA-C vs SA
TRINITY_DN3401_c0_g1_i7	1961.81	2	4.18138e-171	-0.598576	Downregulated	SA-C vs SA
TRINITY_DN3416_c0_g1_i3	1345.72	1	1.18234e-154	-0.625668	Downregulated	SA-C vs SA
TRINITY_DN3421_c0_g2_i4	7065.99	35.83	6.98959e-227	-0.461136	Downregulated	SA-C vs SA
TRINITY_DN3431_c0_g1_i1	1698	2	8.46454e-165	-0.586204	Downregulated	SA-C vs SA
TRINITY_DN344_c0_g1_i3	23	19	1.41877e-11	-0.0247752	Downregulated	SA-C vs SA
TRINITY_DN3441_c0_g1_i2	65874.8	9	0	-0.770767	Downregulated	SA-C vs SA
TRINITY_DN35_c0_g1_i2	14	25.61	1.5793e-05	0.0433347	Upregulated	SA-C vs SA
TRINITY_DN350_c0_g1_i1	1186	1	3.9967e-149	-0.614843	Downregulated	SA-C vs SA
TRINITY_DN351_c0_g5_i1	1	2723	9.60174e-43	0.669239	Upregulated	SA-C vs SA
TRINITY_DN3533_c0_g2_i2	1	26679	2.14578e-121	0.864761	Upregulated	SA-C vs SA
TRINITY_DN3533_c1_g1_i1	21	60838	6.58132e-133	0.674547	Upregulated	SA-C vs SA
TRINITY_DN3533_c1_g2_i1	19	7119	4.02261e-51	0.49931	Upregulated	SA-C vs SA
TRINITY_DN3533_c1_g3_i1	6	6221	1.22481e-59	0.586514	Upregulated	SA-C vs SA
TRINITY_DN35673_c0_g1_i1	36	16880	2.46964e-70	0.518526	Upregulated	SA-C vs SA
TRINITY_DN35680_c0_g1_i1	21	7929	3.79696e-53	0.499968	Upregulated	SA-C vs SA
TRINITY_DN35705_c0_g1_i1	43	19422	1.05058e-71	0.515321	Upregulated	SA-C vs SA
TRINITY_DN35711_c0_g1_i1	37	20827	1.12153e-77	0.534181	Upregulated	SA-C vs SA
TRINITY_DN35722_c0_g1_i1	1	325	2.04358e-07	0.487122	Upregulated	SA-C vs SA
TRINITY_DN35798_c0_g1_i1	21	4169	1.71204e-33	0.444892	Upregulated	SA-C vs SA
TRINITY_DN35867_c0_g1_i1	2088	2	8.1205e-174	-0.603917	Downregulated	SA-C vs SA
TRINITY_DN3588_c0_g1_i1	89	1	3.07994e-37	-0.39297	Downregulated	SA-C vs SA
TRINITY_DN35888_c0_g1_i1	18	8658	1.30379e-58	0.520711	Upregulated	SA-C vs SA
TRINITY_DN35892_c0_g1_i1	1	2572	2.37247e-41	0.664351	Upregulated	SA-C vs SA
TRINITY_DN35896_c0_g1_i1	3	7020	4.12097e-68	0.656252	Upregulated	SA-C vs SA
TRINITY_DN359_c0_g3_i1	29	4737	3.36876e-32	0.428181	Upregulated	SA-C vs SA
TRINITY_DN35901_c0_g1_i1	1	10120	1.63932e-84	0.781711	Upregulated	SA-C vs SA
TRINITY_DN35926_c0_g1_i1	3664	4	2.6195e-198	-0.592711	Downregulated	SA-C vs SA
TRINITY_DN35933_c0_g1_i1	23	1465	1.50836e-10	0.347497	Upregulated	SA-C vs SA
TRINITY_DN35938_c0_g1_i1	1	4501	3.96851e-57	0.712296	Upregulated	SA-C vs SA
TRINITY_DN35971_c0_g1_i1	15	1246	8.04819e-12	0.370246	Upregulated	SA-C vs SA
TRINITY_DN36_c0_g2_i1	5	9368	4.72048e-75	0.637207	Upregulated	SA-C vs SA
TRINITY_DN36_c0_g2_i3	1	7686	1.05619e-74	0.758141	Upregulated	SA-C vs SA
TRINITY_DN36_c0_g3_i1	26	1692	1.63293e-11	0.349335	Upregulated	SA-C vs SA
TRINITY_DN36_c1_g2_i1	15	1961	1.72205e-19	0.409101	Upregulated	SA-C vs SA
TRINITY_DN36_c2_g1_i1	15	11082	4.43879e-70	0.557479	Upregulated	SA-C vs SA
TRINITY_DN360_c0_g2_i1	42	17119	1.90153e-67	0.506524	Upregulated	SA-C vs SA
TRINITY_DN36059_c0_g1_i1	8	4150	3.84373e-44	0.527184	Upregulated	SA-C vs SA
TRINITY_DN36066_c0_g1_i1	2906	2	3.23824e-188	-0.632239	Downregulated	SA-C vs SA
TRINITY_DN36086_c0_g1_i1	4	8982	4.84402e-75	0.65272	Upregulated	SA-C vs SA
TRINITY_DN3614_c0_g1_i1	1	21405	1.13617e-112	0.845891	Upregulated	SA-C vs SA
TRINITY_DN3614_c3_g2_i1	23	223	0.182966	0.186219	Nonsignificant	SA-C vs SA
TRINITY_DN364_c0_g1_i11	5374.39	4.5	5.71266e-215	-0.615441	Downregulated	SA-C vs SA
TRINITY_DN364_c0_g1_i5	1343.6	4.5	1.32969e-154	-0.496671	Downregulated	SA-C vs SA
TRINITY_DN36438_c0_g1_i1	1	1542	2.70196e-29	0.620519	Upregulated	SA-C vs SA
TRINITY_DN365_c0_g2_i1	31	6405	9.10566e-40	0.448314	Upregulated	SA-C vs SA
TRINITY_DN366_c0_g1_i26	2707.51	1	3.82153e-185	-0.685563	Downregulated	SA-C vs SA
TRINITY_DN36619_c0_g1_i2	1	93	0.0324684	0.379924	Upregulated	SA-C vs SA
TRINITY_DN36702_c0_g1_i1	12	1603	1.21673e-17	0.410949	Upregulated	SA-C vs SA
TRINITY_DN3678_c0_g2_i1	6056	1	3.67097e-220	-0.754533	Downregulated	SA-C vs SA
TRINITY_DN36845_c0_g1_i1	2007	2	4.3427e-172	-0.600528	Downregulated	SA-C vs SA
TRINITY_DN369_c1_g2_i1	31	5762	1.01218e-36	0.43925	Upregulated	SA-C vs SA
TRINITY_DN37_c0_g1_i1	71.5	7704.44	3.86307e-29	0.39254	Upregulated	SA-C vs SA
TRINITY_DN37_c0_g2_i3	14.3	31721.1	4.07567e-112	0.651674	Upregulated	SA-C vs SA
TRINITY_DN37_c0_g2_i4	44.4	16452.3	6.86047e-65	0.498359	Upregulated	SA-C vs SA
TRINITY_DN37_c0_g2_i5	4.8	8526.65	8.37016e-72	0.632642	Upregulated	SA-C vs SA
TRINITY_DN37_c0_g4_i3	1	7761	4.48271e-75	0.758973	Upregulated	SA-C vs SA
TRINITY_DN37_c0_g4_i4	11	6207.93	1.02988e-53	0.534403	Upregulated	SA-C vs SA
TRINITY_DN37_c2_g1_i1	24	12265	2.23313e-66	0.525901	Upregulated	SA-C vs SA
TRINITY_DN371_c0_g1_i1	1896.63	4	1.22618e-169	-0.536296	Downregulated	SA-C vs SA
TRINITY_DN3721_c0_g1_i2	1	285	1.22095e-06	0.47587	Upregulated	SA-C vs SA
TRINITY_DN37391_c0_g1_i2	12	1	2.47519e-06	-0.221301	Downregulated	SA-C vs SA
TRINITY_DN374_c0_g1_i2	4177.14	2	5.25262e-204	-0.663326	Downregulated	SA-C vs SA
TRINITY_DN37461_c0_g1_i1	15	3	7.04324e-08	-0.146295	Downregulated	SA-C vs SA
TRINITY_DN3776_c0_g1_i1	7	17630	1.70383e-96	0.662552	Upregulated	SA-C vs SA
TRINITY_DN378_c0_g1_i5	2	11915.3	1.06074e-88	0.736317	Upregulated	SA-C vs SA
TRINITY_DN378_c0_g2_i10	13	351.19	0.0618264	0.274011	Nonsignificant	SA-C vs SA
TRINITY_DN378_c2_g1_i1	8	12687	1.35462e-82	0.622923	Upregulated	SA-C vs SA
TRINITY_DN38_c0_g1_i1	30	77604	2.50751e-136	0.664843	Upregulated	SA-C vs SA
TRINITY_DN3812_c0_g1_i1	33	25	3.93677e-16	-0.0321926	Downregulated	SA-C vs SA
TRINITY_DN383_c0_g2_i3	142.47	1	4.01423e-55	-0.43328	Downregulated	SA-C vs SA
TRINITY_DN384_c0_g2_i1	18	49785	4.13716e-127	0.670576	Upregulated	SA-C vs SA
TRINITY_DN38531_c0_g1_i1	11	7	1.3552e-06	-0.0471304	Downregulated	SA-C vs SA
TRINITY_DN3871_c0_g2_i6	1586.76	5	7.42079e-162	-0.501895	Downregulated	SA-C vs SA
TRINITY_DN3874_c0_g1_i2	858.45	1	6.12437e-135	-0.587152	Downregulated	SA-C vs SA
TRINITY_DN388_c0_g1_i4	24.2	1	1.63617e-11	-0.281397	Downregulated	SA-C vs SA
TRINITY_DN3882_c0_g2_i1	4532.7	1.5	1.44965e-207	-0.694972	Downregulated	SA-C vs SA
TRINITY_DN3882_c0_g2_i3	395.3	1.5	1.02764e-100	-0.485974	Downregulated	SA-C vs SA
TRINITY_DN389_c0_g1_i1	2657	1	2.57725e-184	-0.68395	Downregulated	SA-C vs SA
TRINITY_DN3890_c1_g1_i5	8488.48	1	7.74747e-235	-0.783462	Downregulated	SA-C vs SA
TRINITY_DN38928_c0_g1_i2	17	1	2.21221e-08	-0.251142	Downregulated	SA-C vs SA
TRINITY_DN391_c0_g3_i1	28351	20	3.06127e-287	-0.630123	Downregulated	SA-C vs SA
TRINITY_DN392_c0_g1_i1	268	1.5	2.29031e-83	-0.452676	Downregulated	SA-C vs SA
TRINITY_DN3923_c0_g1_i2	15	58	0.00157061	0.10746	Upregulated	SA-C vs SA
TRINITY_DN3974_c0_g2_i1	10	5936	2.24546e-53	0.538731	Upregulated	SA-C vs SA
TRINITY_DN399_c0_g1_i1	1506	3	1.42456e-159	-0.541185	Downregulated	SA-C vs SA
TRINITY_DN40_c0_g5_i4	17	11652.8	5.36345e-70	0.551059	Upregulated	SA-C vs SA
TRINITY_DN400_c0_g1_i1	15146	2.5	5.2962e-260	-0.754567	Downregulated	SA-C vs SA
TRINITY_DN402_c0_g1_i4	81531	15	0	-0.74527	Downregulated	SA-C vs SA
TRINITY_DN402_c3_g1_i1	1196	1	1.72397e-149	-0.615563	Downregulated	SA-C vs SA
TRINITY_DN40236_c0_g1_i1	16	1	3.94049e-08	-0.245948	Downregulated	SA-C vs SA
TRINITY_DN40579_c0_g1_i1	5	3081	2.25167e-39	0.541933	Upregulated	SA-C vs SA
TRINITY_DN40591_c0_g1_i1	29	82455	1.27566e-139	0.672942	Upregulated	SA-C vs SA
TRINITY_DN406_c0_g1_i3	66	1	2.32161e-28	-0.367355	Downregulated	SA-C vs SA
TRINITY_DN406_c2_g3_i1	6	76	0.888764	0.20912	Nonsignificant	SA-C vs SA
TRINITY_DN406_c3_g1_i1	18	3055	2.36041e-27	0.431463	Upregulated	SA-C vs SA
TRINITY_DN40613_c0_g1_i1	3	2323	7.49862e-35	0.561504	Upregulated	SA-C vs SA
TRINITY_DN40614_c0_g1_i1	1	14196	4.01038e-97	0.810707	Upregulated	SA-C vs SA
TRINITY_DN40701_c0_g1_i1	88	10190	9.43735e-33	0.398706	Upregulated	SA-C vs SA
TRINITY_DN40727_c0_g1_i1	1131	1	4.7542e-147	-0.610775	Downregulated	SA-C vs SA
TRINITY_DN40729_c0_g1_i1	17	4824	1.66184e-40	0.475498	Upregulated	SA-C vs SA
TRINITY_DN40759_c0_g1_i1	12	8181	4.37826e-62	0.550594	Upregulated	SA-C vs SA
TRINITY_DN40760_c0_g1_i1	16	516	0.00525155	0.289187	Upregulated	SA-C vs SA
TRINITY_DN40767_c0_g1_i1	1	12824	4.5674e-93	0.801999	Upregulated	SA-C vs SA
TRINITY_DN40774_c0_g1_i1	34	6864	2.53666e-40	0.446329	Upregulated	SA-C vs SA
TRINITY_DN40776_c0_g1_i1	8	5154	7.94601e-51	0.545747	Upregulated	SA-C vs SA
TRINITY_DN40784_c0_g1_i1	4	13324	1.10487e-89	0.686506	Upregulated	SA-C vs SA
TRINITY_DN40808_c0_g1_i1	1	5376	4.78014e-63	0.727516	Upregulated	SA-C vs SA
TRINITY_DN40848_c0_g1_i1	1914	1	5.07155e-170	-0.655848	Downregulated	SA-C vs SA
TRINITY_DN4087_c0_g1_i1	1304.06	1	2.8441e-153	-0.622973	Downregulated	SA-C vs SA
TRINITY_DN4087_c0_g2_i1	12392.7	4	2.75044e-251	-0.697111	Downregulated	SA-C vs SA
TRINITY_DN409_c0_g2_i1	395.01	1	1.02764e-100	-0.52065	Downregulated	SA-C vs SA
TRINITY_DN41_c0_g2_i5	170.07	1	5.88834e-63	-0.448451	Downregulated	SA-C vs SA
TRINITY_DN410_c0_g1_i1	17	12	1.29729e-09	-0.0382477	Downregulated	SA-C vs SA
TRINITY_DN4107_c1_g2_i1	1036	1	3.28427e-143	-0.603258	Downregulated	SA-C vs SA
TRINITY_DN41076_c0_g1_i1	24	1	1.63617e-11	-0.280686	Downregulated	SA-C vs SA
TRINITY_DN411_c0_g2_i1	9	1997.7	2.01915e-24	0.454455	Upregulated	SA-C vs SA
TRINITY_DN411_c1_g2_i1	16	24	5.49458e-07	0.0263317	Upregulated	SA-C vs SA
TRINITY_DN411_c1_g4_i1	18	66180	4.25594e-139	0.694965	Upregulated	SA-C vs SA
TRINITY_DN415_c0_g1_i1	2	15622	9.08832e-99	0.759523	Upregulated	SA-C vs SA
TRINITY_DN41979_c0_g1_i1	38	5	9.20566e-18	-0.182168	Downregulated	SA-C vs SA
TRINITY_DN420_c0_g2_i4	1094.47	1	1.37666e-145	-0.607962	Downregulated	SA-C vs SA
TRINITY_DN4202_c0_g3_i1	31	42359	4.01378e-110	0.610162	Upregulated	SA-C vs SA
TRINITY_DN42072_c0_g1_i1	15	120	0.120229	0.16975	Nonsignificant	SA-C vs SA
TRINITY_DN42109_c0_g1_i1	1	821	1.33371e-17	0.566517	Upregulated	SA-C vs SA
TRINITY_DN4217_c0_g1_i1	3173	1	4.81485e-192	-0.699155	Downregulated	SA-C vs SA
TRINITY_DN423_c0_g1_i1	40.9	1	1.47817e-18	-0.326357	Downregulated	SA-C vs SA
TRINITY_DN42311_c0_g1_i1	5	3113	1.12794e-39	0.542818	Upregulated	SA-C vs SA
TRINITY_DN424_c0_g1_i1	2843.71	3	2.81942e-187	-0.595644	Downregulated	SA-C vs SA
TRINITY_DN4244_c0_g1_i1	456	2	4.42759e-107	-0.473566	Downregulated	SA-C vs SA
TRINITY_DN42460_c0_g1_i1	19	1	2.27269e-09	-0.260671	Downregulated	SA-C vs SA
TRINITY_DN4254_c0_g1_i1	176.22	1.04	1.52575e-64	-0.448134	Downregulated	SA-C vs SA
TRINITY_DN4254_c0_g1_i2	4600.9	0.48	3.27582e-208	-0.793873	Downregulated	SA-C vs SA
TRINITY_DN4254_c0_g1_i5	121.83	0.48	8.6751e-49	-0.482754	Downregulated	SA-C vs SA
TRINITY_DN43_c0_g1_i17	46	22350.1	1.61086e-75	0.521574	Upregulated	SA-C vs SA
TRINITY_DN43_c0_g3_i2	55	43225.5	2.54865e-97	0.562776	Upregulated	SA-C vs SA
TRINITY_DN4327_c0_g4_i1	4152	1	9.55515e-204	-0.722194	Downregulated	SA-C vs SA
TRINITY_DN433_c0_g1_i1	19	20332.6	1.04511e-89	0.589223	Upregulated	SA-C vs SA
TRINITY_DN4351_c0_g1_i1	6035	3	5.19331e-220	-0.660112	Downregulated	SA-C vs SA
TRINITY_DN439_c0_g2_i6	3993.99	2	4.67527e-202	-0.659485	Downregulated	SA-C vs SA
TRINITY_DN439_c0_g2_i7	588.02	2	2.41767e-118	-0.49535	Downregulated	SA-C vs SA
TRINITY_DN44_c0_g1_i2	0.21	17146.5	2.69728e-106	0.960594	Upregulated	SA-C vs SA
TRINITY_DN44_c0_g1_i5	43.28	4110.05	2.50582e-22	0.381714	Upregulated	SA-C vs SA
TRINITY_DN44_c0_g1_i6	5.74	23911.2	8.70257e-110	0.705664	Upregulated	SA-C vs SA
TRINITY_DN44_c0_g5_i1	1	7790	3.18818e-75	0.759292	Upregulated	SA-C vs SA
TRINITY_DN44_c1_g2_i1	5	8768	7.55116e-73	0.631536	Upregulated	SA-C vs SA
TRINITY_DN443_c0_g5_i2	15	3551.83	2.88421e-33	0.459993	Upregulated	SA-C vs SA
TRINITY_DN445_c0_g1_i1	62814	19	0	-0.702673	Downregulated	SA-C vs SA
TRINITY_DN4459_c0_g1_i1	4106	42	2.74206e-203	-0.401015	Downregulated	SA-C vs SA
TRINITY_DN4459_c0_g2_i1	1688	1	1.52746e-164	-0.645083	Downregulated	SA-C vs SA
TRINITY_DN4497_c0_g2_i3	1697.96	26	7.7137e-165	-0.36645	Downregulated	SA-C vs SA
TRINITY_DN45_c0_g1_i15	1.33	550.67	1.48701e-12	0.507867	Upregulated	SA-C vs SA
TRINITY_DN45_c0_g1_i2	4.67	9327.76	6.98781e-75	0.642688	Upregulated	SA-C vs SA
TRINITY_DN45_c0_g1_i5	6	562.89	1.31574e-07	0.380671	Upregulated	SA-C vs SA
TRINITY_DN4517_c0_g1_i1	1363	16	3.03395e-155	-0.389219	Downregulated	SA-C vs SA
TRINITY_DN4517_c0_g2_i1	12207	9	1.24803e-250	-0.626341	Downregulated	SA-C vs SA
TRINITY_DN452_c0_g1_i1	1556.24	3	5.3488e-161	-0.543996	Downregulated	SA-C vs SA
TRINITY_DN45300_c0_g1_i1	1	5223	5.39812e-62	0.725042	Upregulated	SA-C vs SA
TRINITY_DN45330_c0_g1_i1	1	17598	4.84483e-105	0.829113	Upregulated	SA-C vs SA
TRINITY_DN45342_c0_g1_i1	50	5326	3.39001e-26	0.391553	Upregulated	SA-C vs SA
TRINITY_DN4535_c0_g4_i1	1	900	3.57988e-19	0.574388	Upregulated	SA-C vs SA
TRINITY_DN45367_c0_g1_i1	1	3783	6.58115e-52	0.697407	Upregulated	SA-C vs SA
TRINITY_DN45388_c0_g1_i1	21	3	1.42164e-10	-0.175122	Downregulated	SA-C vs SA
TRINITY_DN45391_c0_g1_i1	1	13480	4.72427e-95	0.806273	Upregulated	SA-C vs SA
TRINITY_DN45393_c0_g1_i1	8	14834	1.8862e-88	0.636318	Upregulated	SA-C vs SA
TRINITY_DN454_c0_g2_i1	17	6560	4.338e-50	0.501834	Upregulated	SA-C vs SA
TRINITY_DN454_c0_g8_i1	2	1403	3.37145e-25	0.55304	Upregulated	SA-C vs SA
TRINITY_DN454_c0_g9_i1	2	10104	1.3193e-82	0.72219	Upregulated	SA-C vs SA
TRINITY_DN45420_c0_g1_i1	19	8696	9.0975e-58	0.516454	Upregulated	SA-C vs SA
TRINITY_DN45429_c0_g1_i1	20	1730	1.77016e-14	0.373716	Upregulated	SA-C vs SA
TRINITY_DN45472_c0_g1_i1	6553	3	1.36621e-223	-0.667167	Downregulated	SA-C vs SA
TRINITY_DN45474_c0_g1_i1	6	5519	1.07489e-55	0.576256	Upregulated	SA-C vs SA
TRINITY_DN45535_c0_g1_i1	11	37	0.00401524	0.0955191	Upregulated	SA-C vs SA
TRINITY_DN456_c0_g2_i1	30	7620	6.52105e-46	0.466004	Upregulated	SA-C vs SA
TRINITY_DN45669_c0_g1_i1	1	4343	2.97316e-56	0.709234	Upregulated	SA-C vs SA
TRINITY_DN45693_c0_g1_i1	17	1639	4.31198e-15	0.383011	Upregulated	SA-C vs SA
TRINITY_DN45700_c0_g1_i1	24	944	3.3586e-05	0.306198	Upregulated	SA-C vs SA
TRINITY_DN45714_c0_g1_i1	1	1310	6.90143e-26	0.60655	Upregulated	SA-C vs SA
TRINITY_DN45739_c0_g1_i1	18	4694	6.8344e-39	0.468261	Upregulated	SA-C vs SA
TRINITY_DN458_c0_g9_i1	16	7699.59	4.31865e-56	0.520751	Upregulated	SA-C vs SA
TRINITY_DN45800_c0_g1_i1	1	351	5.80491e-08	0.493716	Upregulated	SA-C vs SA
TRINITY_DN45859_c0_g1_i1	23	7396	1.79582e-49	0.486212	Upregulated	SA-C vs SA
TRINITY_DN46011_c0_g1_i1	2100	7	4.50267e-174	-0.497078	Downregulated	SA-C vs SA
TRINITY_DN4605_c1_g2_i2	47.62	0.44	3.16535e-21	-0.409728	Downregulated	SA-C vs SA
TRINITY_DN4605_c1_g2_i5	4454.93	2.56	8.25196e-207	-0.647693	Downregulated	SA-C vs SA
TRINITY_DN46087_c0_g1_i1	2.05	28	1	0.215579	Nonsignificant	SA-C vs SA
TRINITY_DN461_c0_g1_i11	225.36	1	1.69479e-75	-0.472568	Downregulated	SA-C vs SA
TRINITY_DN461_c0_g1_i6	1196.03	1	1.72397e-149	-0.615565	Downregulated	SA-C vs SA
TRINITY_DN46229_c0_g1_i1	1993	1	8.71426e-172	-0.659313	Downregulated	SA-C vs SA
TRINITY_DN47_c0_g1_i1	199	772	7.18859e-15	0.107741	Upregulated	SA-C vs SA
TRINITY_DN4716_c1_g3_i1	19	87781	2.10899e-150	0.714533	Upregulated	SA-C vs SA
TRINITY_DN472_c1_g2_i1	63	33	4.76291e-30	-0.0638063	Downregulated	SA-C vs SA
TRINITY_DN4728_c0_g1_i1	3	39	1	0.211345	Nonsignificant	SA-C vs SA
TRINITY_DN47490_c0_g1_i1	1	538	3.91525e-12	0.530305	Upregulated	SA-C vs SA
TRINITY_DN477_c0_g1_i2	5964.39	7	1.68976e-219	-0.586511	Downregulated	SA-C vs SA
TRINITY_DN477_c0_g1_i4	14870.1	19	3.30529e-259	-0.579231	Downregulated	SA-C vs SA
TRINITY_DN48_c0_g2_i1	1	7775	3.77989e-75	0.759127	Upregulated	SA-C vs SA
TRINITY_DN48_c0_g4_i1	2	27330	6.12655e-121	0.807441	Upregulated	SA-C vs SA
TRINITY_DN482_c0_g1_i2	28.37	44	1.21325e-10	0.0291925	Upregulated	SA-C vs SA
TRINITY_DN486_c0_g2_i8	43	1	1.57453e-19	-0.330647	Downregulated	SA-C vs SA
TRINITY_DN4868_c0_g1_i1	4082	13	5.16943e-203	-0.500986	Downregulated	SA-C vs SA
TRINITY_DN4871_c0_g2_i1	82	1	1.29898e-34	-0.385952	Downregulated	SA-C vs SA
TRINITY_DN4874_c2_g1_i1	10328.6	3	2.27451e-243	-0.706148	Downregulated	SA-C vs SA
TRINITY_DN4918_c0_g1_i2	14	3298	4.31315e-32	0.459551	Upregulated	SA-C vs SA
TRINITY_DN4918_c0_g3_i1	29	16032	8.10137e-73	0.532635	Upregulated	SA-C vs SA
TRINITY_DN4933_c0_g1_i1	11	3880	4.03901e-39	0.494137	Upregulated	SA-C vs SA
TRINITY_DN494_c0_g3_i1	775	1	1.77682e-130	-0.57839	Downregulated	SA-C vs SA
TRINITY_DN497_c0_g2_i1	19	5028	3.89914e-40	0.469517	Upregulated	SA-C vs SA
TRINITY_DN5_c0_g1_i21	10	42970.8	6.86124e-129	0.708324	Upregulated	SA-C vs SA
TRINITY_DN5_c0_g1_i28	2.42	40.06	0.832022	0.23205	Nonsignificant	SA-C vs SA
TRINITY_DN5_c0_g1_i37	20.58	16206.5	4.06691e-79	0.562947	Upregulated	SA-C vs SA
TRINITY_DN5_c0_g2_i2	24	33842.1	4.84978e-106	0.612858	Upregulated	SA-C vs SA
TRINITY_DN50_c0_g1_i7	15530.6	27	4.2499e-261	-0.552848	Downregulated	SA-C vs SA
TRINITY_DN50022_c0_g1_i1	1	1658	7.44283e-31	0.626733	Upregulated	SA-C vs SA
TRINITY_DN50023_c0_g1_i1	12	1366	7.7439e-15	0.397242	Upregulated	SA-C vs SA
TRINITY_DN50031_c0_g1_i1	9	4602	2.84911e-46	0.52595	Upregulated	SA-C vs SA
TRINITY_DN50074_c0_g1_i1	1	10577	3.10396e-86	0.785495	Upregulated	SA-C vs SA
TRINITY_DN50086_c0_g1_i1	8	6172	8.25532e-57	0.561189	Upregulated	SA-C vs SA
TRINITY_DN50100_c0_g1_i1	79	48050	1.2912e-91	0.540817	Upregulated	SA-C vs SA
TRINITY_DN50114_c0_g1_i1	1	108	0.0155637	0.392735	Upregulated	SA-C vs SA
TRINITY_DN5012_c0_g1_i1	13	100	0.130311	0.166389	Nonsignificant	SA-C vs SA
TRINITY_DN50169_c0_g1_i1	7	762	4.17292e-10	0.393412	Upregulated	SA-C vs SA
TRINITY_DN50198_c0_g1_i1	1	2375	2.88754e-39	0.657524	Upregulated	SA-C vs SA
TRINITY_DN5021_c0_g1_i1	2	9361	1.16902e-79	0.715646	Upregulated	SA-C vs SA
TRINITY_DN50253_c0_g1_i1	1	753	2.61021e-16	0.55911	Upregulated	SA-C vs SA
TRINITY_DN50264_c0_g1_i1	15	12806	2.33044e-75	0.569867	Upregulated	SA-C vs SA
TRINITY_DN50282_c0_g1_i1	1	3035	8.91577e-46	0.678532	Upregulated	SA-C vs SA
TRINITY_DN50284_c0_g1_i1	1	4279	9.77254e-56	0.707962	Upregulated	SA-C vs SA
TRINITY_DN5029_c0_g2_i1	983.17	1	6.62814e-141	-0.598774	Downregulated	SA-C vs SA
TRINITY_DN50328_c0_g1_i1	1	3025	1.07175e-45	0.67825	Upregulated	SA-C vs SA
TRINITY_DN50366_c0_g1_i1	1	6244	1.01897e-67	0.740339	Upregulated	SA-C vs SA
TRINITY_DN50483_c0_g1_i1	21	4387	7.79652e-35	0.449259	Upregulated	SA-C vs SA
TRINITY_DN505_c0_g1_i1	12	9345	9.68138e-67	0.561991	Upregulated	SA-C vs SA
TRINITY_DN50535_c0_g1_i1	13	13156	2.84462e-78	0.584437	Upregulated	SA-C vs SA
TRINITY_DN50598_c0_g1_i1	1	2069	5.90949e-36	0.645706	Upregulated	SA-C vs SA
TRINITY_DN5082_c0_g1_i1	510	1	4.79656e-112	-0.542539	Downregulated	SA-C vs SA
TRINITY_DN50980_c0_g1_i1	14	13	3.02271e-07	-0.0147558	Downregulated	SA-C vs SA
TRINITY_DN51_c0_g1_i3	1	816.55	1.63635e-17	0.566052	Upregulated	SA-C vs SA
TRINITY_DN51120_c0_g1_i1	2	1532	4.88414e-27	0.560577	Upregulated	SA-C vs SA
TRINITY_DN51208_c0_g1_i1	21	131	0.0104472	0.148436	Upregulated	SA-C vs SA
TRINITY_DN514_c0_g1_i1	18	9784	7.44818e-63	0.531186	Upregulated	SA-C vs SA
TRINITY_DN5148_c0_g1_i1	11	30259	1.76027e-113	0.67011	Upregulated	SA-C vs SA
TRINITY_DN515_c0_g2_i2	352.72	3	9.89106e-96	-0.416824	Downregulated	SA-C vs SA
TRINITY_DN5153_c0_g1_i1	353	185	1.89666e-70	-0.0637622	Downregulated	SA-C vs SA
TRINITY_DN5153_c0_g2_i1	276	169	3.59733e-62	-0.0504303	Downregulated	SA-C vs SA
TRINITY_DN51613_c0_g1_i1	14	1	4.1078e-07	-0.234508	Downregulated	SA-C vs SA
TRINITY_DN51690_c0_g1_i1	13	1	7.44748e-07	-0.228158	Downregulated	SA-C vs SA
TRINITY_DN52_c0_g1_i1	35	51620	8.76722e-116	0.616705	Upregulated	SA-C vs SA
TRINITY_DN52_c0_g2_i12	238762	264.31	0	-0.591519	Downregulated	SA-C vs SA
TRINITY_DN52_c0_g2_i6	62	14473	2.47197e-52	0.458771	Upregulated	SA-C vs SA
TRINITY_DN52_c0_g2_i7	3.55059e+06	1682.07	0	-0.664235	Downregulated	SA-C vs SA
TRINITY_DN5202_c2_g1_i1	8	3819	9.53329e-42	0.520063	Upregulated	SA-C vs SA
TRINITY_DN52021_c0_g1_i1	1	736	3.51518e-16	0.557154	Upregulated	SA-C vs SA
TRINITY_DN521_c0_g1_i1	28	13	1.98699e-14	-0.0741411	Downregulated	SA-C vs SA
TRINITY_DN523_c0_g1_i3	805.81	2	3.31293e-132	-0.522345	Downregulated	SA-C vs SA
TRINITY_DN526_c0_g1_i1	4	3692	5.2416e-46	0.57655	Upregulated	SA-C vs SA
TRINITY_DN526_c0_g5_i1	39	13078	3.11988e-59	0.489804	Upregulated	SA-C vs SA
TRINITY_DN5269_c1_g1_i1	1254.85	3	1.30868e-151	-0.525554	Downregulated	SA-C vs SA
TRINITY_DN5270_c0_g1_i1	24	29	1.63327e-10	0.00780675	Upregulated	SA-C vs SA
TRINITY_DN528_c0_g2_i2	1989.28	10	1.03453e-171	-0.461879	Downregulated	SA-C vs SA
TRINITY_DN52830_c0_g1_i1	34	8	2.45896e-16	-0.132371	Downregulated	SA-C vs SA
TRINITY_DN531_c0_g1_i1	19	5904	5.60278e-45	0.483278	Upregulated	SA-C vs SA
TRINITY_DN53312_c0_g1_i1	100	1	3.01101e-41	-0.402954	Downregulated	SA-C vs SA
TRINITY_DN541_c0_g1_i2	22	20799	6.1838e-88	0.578606	Upregulated	SA-C vs SA
TRINITY_DN5440_c0_g2_i1	193.38	1	1.12713e-68	-0.459456	Downregulated	SA-C vs SA
TRINITY_DN5517_c0_g1_i1	19	24	2.97612e-08	0.0116084	Upregulated	SA-C vs SA
TRINITY_DN5523_c0_g1_i3	900	1	4.84013e-137	-0.591201	Downregulated	SA-C vs SA
TRINITY_DN5548_c0_g2_i1	22	7843	4.82822e-52	0.495048	Upregulated	SA-C vs SA
TRINITY_DN558_c0_g3_i1	6809	3	2.94339e-225	-0.67045	Downregulated	SA-C vs SA
TRINITY_DN56_c0_g3_i1	1	7646	1.62571e-74	0.757694	Upregulated	SA-C vs SA
TRINITY_DN56_c0_g4_i1	35	11183	7.71904e-56	0.485664	Upregulated	SA-C vs SA
TRINITY_DN56_c2_g1_i1	12	908	3.23049e-09	0.362252	Upregulated	SA-C vs SA
TRINITY_DN56_c3_g2_i1	1	23362	2.83537e-116	0.853386	Upregulated	SA-C vs SA
TRINITY_DN57_c0_g1_i3	36.59	9421.47	5.71189e-49	0.467173	Upregulated	SA-C vs SA
TRINITY_DN57_c0_g1_i4	0.41	8249.66	9.40681e-80	0.840592	Upregulated	SA-C vs SA
TRINITY_DN576_c0_g1_i3	1259.31	1	9.75957e-152	-0.619982	Downregulated	SA-C vs SA
TRINITY_DN5777_c0_g1_i3	75.17	3	4.18032e-32	-0.284378	Downregulated	SA-C vs SA
TRINITY_DN5777_c1_g1_i1	1630.71	1	4.83821e-163	-0.642125	Downregulated	SA-C vs SA
TRINITY_DN584_c0_g1_i1	1071.27	3	1.11852e-144	-0.512003	Downregulated	SA-C vs SA
TRINITY_DN5848_c0_g1_i1	75	67	7.84222e-29	-0.0180703	Downregulated	SA-C vs SA
TRINITY_DN5849_c0_g1_i1	25	4541	2.63139e-33	0.437277	Upregulated	SA-C vs SA
TRINITY_DN586_c0_g2_i1	284.83	3	3.95652e-86	-0.398509	Downregulated	SA-C vs SA
TRINITY_DN59_c0_g1_i6	6257.18	32.01	1.3485e-221	-0.460379	Downregulated	SA-C vs SA
TRINITY_DN59_c0_g1_i7	37060.7	33.99	7.05223e-299	-0.607638	Downregulated	SA-C vs SA
TRINITY_DN595_c0_g2_i1	2574	30	5.7861e-183	-0.389833	Downregulated	SA-C vs SA
TRINITY_DN597_c0_g2_i1	3307	5	7.54888e-194	-0.564811	Downregulated	SA-C vs SA
TRINITY_DN6_c0_g1_i1	14950.2	2.01	1.95114e-259	-0.772143	Downregulated	SA-C vs SA
TRINITY_DN6_c0_g1_i8	9939.98	94747	0.00285198	0.18476	Upregulated	SA-C vs SA
TRINITY_DN6_c0_g2_i2	131695	17	0	-0.775629	Downregulated	SA-C vs SA
TRINITY_DN60_c0_g1_i11	1482	1	7.32903e-159	-0.633932	Downregulated	SA-C vs SA
TRINITY_DN60_c0_g1_i17	14	88	0.033558	0.149088	Upregulated	SA-C vs SA
TRINITY_DN602_c0_g2_i1	4877.03	1	9.53115e-211	-0.735983	Downregulated	SA-C vs SA
TRINITY_DN602_c0_g4_i1	1092.95	2	1.47995e-145	-0.548458	Downregulated	SA-C vs SA
TRINITY_DN6029_c0_g4_i1	1	5562	6.78696e-64	0.73043	Upregulated	SA-C vs SA
TRINITY_DN6029_c0_g6_i1	1	28316	7.18167e-124	0.869863	Upregulated	SA-C vs SA
TRINITY_DN605_c1_g4_i5	12	12.24	2.75402e-06	-0.00670997	Downregulated	SA-C vs SA
TRINITY_DN608_c1_g1_i1	20	26341	4.57952e-99	0.60701	Upregulated	SA-C vs SA
TRINITY_DN61_c0_g6_i1	33	38911	2.90199e-105	0.597532	Upregulated	SA-C vs SA
TRINITY_DN610_c0_g1_i1	1	9269	1.77472e-81	0.774185	Upregulated	SA-C vs SA
TRINITY_DN610_c0_g3_i1	11	7943	5.4058e-62	0.555519	Upregulated	SA-C vs SA
TRINITY_DN6117_c0_g1_i2	8611.83	1	1.81202e-235	-0.784698	Downregulated	SA-C vs SA
TRINITY_DN612_c0_g2_i2	645.61	1	1.79181e-122	-0.56274	Downregulated	SA-C vs SA
TRINITY_DN612_c0_g4_i1	2335	3	1.09492e-178	-0.578758	Downregulated	SA-C vs SA
TRINITY_DN616_c0_g2_i2	12778.9	10	1.27594e-252	-0.621237	Downregulated	SA-C vs SA
TRINITY_DN616_c0_g3_i1	2653.22	2	2.98937e-184	-0.624442	Downregulated	SA-C vs SA
TRINITY_DN6199_c0_g2_i1	45	46454	2.28259e-105	0.58614	Upregulated	SA-C vs SA
TRINITY_DN62_c0_g1_i10	1719	1	2.47048e-165	-0.646642	Downregulated	SA-C vs SA
TRINITY_DN62_c0_g1_i3	8566.75	763	8.6792e-158	-0.215602	Downregulated	SA-C vs SA
TRINITY_DN628_c0_g1_i1	590	2	1.76348e-118	-0.495638	Downregulated	SA-C vs SA
TRINITY_DN630_c0_g1_i7	15913.6	6	3.75015e-262	-0.683797	Downregulated	SA-C vs SA
TRINITY_DN6321_c0_g1_i1	457	3	3.5046e-107	-0.439015	Downregulated	SA-C vs SA
TRINITY_DN634_c0_g1_i2	15	0.2	2.27396e-07	-0.378307	Downregulated	SA-C vs SA
TRINITY_DN635_c0_g1_i1	115	29136	4.72187e-61	0.465787	Upregulated	SA-C vs SA
TRINITY_DN635_c2_g1_i1	13	1701	4.92482e-18	0.409175	Upregulated	SA-C vs SA
TRINITY_DN640_c0_g2_i1	1088	1	2.40043e-145	-0.607454	Downregulated	SA-C vs SA
TRINITY_DN6406_c0_g1_i1	161	1	1.19849e-60	-0.443756	Downregulated	SA-C vs SA
TRINITY_DN6407_c0_g1_i2	1013.22	1	3.16698e-142	-0.601353	Downregulated	SA-C vs SA
TRINITY_DN6407_c0_g1_i8	139.37	1	2.84274e-54	-0.431395	Downregulated	SA-C vs SA
TRINITY_DN641_c1_g2_i1	797	2	1.01706e-131	-0.521403	Downregulated	SA-C vs SA
TRINITY_DN641_c1_g2_i2	2959	1	5.262e-189	-0.693173	Downregulated	SA-C vs SA
TRINITY_DN6416_c0_g1_i1	15	7513	2.71879e-56	0.524178	Upregulated	SA-C vs SA
TRINITY_DN6421_c0_g2_i1	13	12967	1.04139e-77	0.583197	Upregulated	SA-C vs SA
TRINITY_DN643_c0_g1_i6	2170.73	6	1.60506e-175	-0.513123	Downregulated	SA-C vs SA
TRINITY_DN6448_c0_g1_i3	3982.04	5	6.24446e-202	-0.580725	Downregulated	SA-C vs SA
TRINITY_DN65_c0_g1_i4	8	18037.3	5.78947e-96	0.653069	Upregulated	SA-C vs SA
TRINITY_DN651_c0_g1_i1	274.65	1	1.55215e-84	-0.489514	Downregulated	SA-C vs SA
TRINITY_DN6520_c0_g1_i1	20	277	0.900493	0.216772	Nonsignificant	SA-C vs SA
TRINITY_DN657_c2_g1_i1	3	15316	1.40739e-96	0.72309	Upregulated	SA-C vs SA
TRINITY_DN658_c0_g1_i1	125	2	7.57407e-50	-0.362687	Downregulated	SA-C vs SA
TRINITY_DN6689_c0_g1_i3	296	2	7.97009e-88	-0.436543	Downregulated	SA-C vs SA
TRINITY_DN673_c0_g1_i3	43.87	122919	4.90288e-147	0.671686	Upregulated	SA-C vs SA
TRINITY_DN673_c0_g3_i1	234	306	1.18717e-40	0.014577	Upregulated	SA-C vs SA
TRINITY_DN6761_c0_g11_i1	13	1537	3.28823e-16	0.400489	Upregulated	SA-C vs SA
TRINITY_DN68_c0_g1_i27	1602.44	1	2.94584e-162	-0.640626	Downregulated	SA-C vs SA
TRINITY_DN680_c0_g4_i1	32	1948	1.20205e-11	0.343617	Upregulated	SA-C vs SA
TRINITY_DN680_c1_g1_i2	11	21327	3.59641e-99	0.640139	Upregulated	SA-C vs SA
TRINITY_DN687_c0_g1_i1	11	21	0.000126105	0.0469932	Upregulated	SA-C vs SA
TRINITY_DN687_c0_g1_i3	37	45	7.25215e-15	0.00836385	Upregulated	SA-C vs SA
TRINITY_DN689_c0_g2_i1	18	15601.8	4.01333e-80	0.571165	Upregulated	SA-C vs SA
TRINITY_DN6944_c0_g1_i2	4500.17	3	3.01311e-207	-0.63497	Downregulated	SA-C vs SA
TRINITY_DN6945_c0_g2_i1	52	6169	2.23219e-29	0.400781	Upregulated	SA-C vs SA
TRINITY_DN698_c0_g5_i1	6	1591	1.53533e-22	0.46969	Upregulated	SA-C vs SA
TRINITY_DN698_c0_g8_i2	1	1264.98	4.84155e-25	0.603554	Upregulated	SA-C vs SA
TRINITY_DN6996_c0_g2_i1	4	62306	8.29843e-152	0.818658	Upregulated	SA-C vs SA
TRINITY_DN7_c0_g1_i1	7975.95	4.2	3.90584e-232	-0.655176	Downregulated	SA-C vs SA
TRINITY_DN7_c0_g1_i8	609.16	2.8	6.95968e-120	-0.469549	Downregulated	SA-C vs SA
TRINITY_DN70_c0_g2_i1	13	2837	3.10694e-29	0.453001	Upregulated	SA-C vs SA
TRINITY_DN70_c0_g3_i1	8	2512	9.68811e-31	0.484173	Upregulated	SA-C vs SA
TRINITY_DN70_c0_g4_i1	11	9076	1.19548e-66	0.566943	Upregulated	SA-C vs SA
TRINITY_DN70_c1_g1_i12	26.65	10044.4	5.79882e-57	0.499816	Upregulated	SA-C vs SA
TRINITY_DN70_c1_g1_i2	29.35	3919.05	3.26386e-27	0.410913	Upregulated	SA-C vs SA
TRINITY_DN70_c1_g1_i3	24	18654	4.33444e-82	0.561826	Upregulated	SA-C vs SA
TRINITY_DN70_c1_g2_i1	6	6770	2.23455e-62	0.59376	Upregulated	SA-C vs SA
TRINITY_DN702_c0_g1_i2	163.6	1	1.86676e-61	-0.445128	Downregulated	SA-C vs SA
TRINITY_DN702_c0_g1_i4	436.28	1	4.18556e-105	-0.529163	Downregulated	SA-C vs SA
TRINITY_DN707_c0_g1_i1	22	22	3.93459e-10	-0.00840656	Downregulated	SA-C vs SA
TRINITY_DN71_c0_g2_i1	1	11553	2.557e-89	0.793057	Upregulated	SA-C vs SA
TRINITY_DN711_c0_g1_i8	416.95	1	4.05453e-103	-0.525281	Downregulated	SA-C vs SA
TRINITY_DN7118_c2_g2_i1	1	21981	9.19588e-114	0.848166	Upregulated	SA-C vs SA
TRINITY_DN712_c1_g1_i10	6865.5	27	1.24725e-225	-0.482911	Downregulated	SA-C vs SA
TRINITY_DN712_c1_g1_i11	331.95	1	6.16104e-93	-0.505748	Downregulated	SA-C vs SA
TRINITY_DN712_c1_g3_i1	1342	2	1.58628e-154	-0.566045	Downregulated	SA-C vs SA
TRINITY_DN7122_c0_g1_i1	7	44.84	0.180027	0.150708	Nonsignificant	SA-C vs SA
TRINITY_DN7122_c0_g1_i2	15	0.16	2.27396e-07	-0.397425	Downregulated	SA-C vs SA
TRINITY_DN7142_c0_g1_i1	1	639.16	2.40572e-14	0.545067	Upregulated	SA-C vs SA
TRINITY_DN716_c0_g1_i1	13	25	4.04722e-05	0.0476186	Upregulated	SA-C vs SA
TRINITY_DN7164_c0_g2_i2	12622	6	4.40829e-252	-0.663943	Downregulated	SA-C vs SA
TRINITY_DN717_c0_g1_i3	11	8	1.3552e-06	-0.0356901	Downregulated	SA-C vs SA
TRINITY_DN72_c0_g2_i2	24	338542	2.97315e-204	0.810162	Upregulated	SA-C vs SA
TRINITY_DN7208_c0_g4_i1	81436	116	1.961319e-317	-0.569919	Downregulated	SA-C vs SA
TRINITY_DN7211_c1_g3_i1	1	3189	5.21705e-47	0.682773	Upregulated	SA-C vs SA
TRINITY_DN7260_c0_g1_i1	13	14691	1.47729e-82	0.593892	Upregulated	SA-C vs SA
TRINITY_DN7298_c0_g1_i1	1	3840	2.0689e-52	0.698688	Upregulated	SA-C vs SA
TRINITY_DN73_c0_g1_i1	3	6792	6.80378e-67	0.653423	Upregulated	SA-C vs SA
TRINITY_DN73_c0_g7_i1	1	3572	2.18215e-50	0.69249	Upregulated	SA-C vs SA
TRINITY_DN73_c0_g9_i1	1	3896	6.58918e-53	0.699929	Upregulated	SA-C vs SA
TRINITY_DN7304_c0_g1_i1	547	1	3.76763e-115	-0.54854	Downregulated	SA-C vs SA
TRINITY_DN735_c0_g2_i3	782.56	4	5.9948e-131	-0.460451	Downregulated	SA-C vs SA
TRINITY_DN736_c0_g1_i1	4912	2	4.67392e-211	-0.67721	Downregulated	SA-C vs SA
TRINITY_DN739_c0_g2_i7	1730.61	1	1.22522e-165	-0.647219	Downregulated	SA-C vs SA
TRINITY_DN74_c0_g1_i7	85672	31	0	-0.68732	Downregulated	SA-C vs SA
TRINITY_DN740_c1_g1_i1	1	1761	3.72617e-32	0.631897	Upregulated	SA-C vs SA
TRINITY_DN744_c0_g4_i1	344742	425	0	-0.582297	Downregulated	SA-C vs SA
TRINITY_DN7446_c0_g1_i1	367.2	3	1.90692e-97	-0.420271	Downregulated	SA-C vs SA
TRINITY_DN7446_c0_g1_i3	792.12	1	1.97912e-131	-0.580262	Downregulated	SA-C vs SA
TRINITY_DN745_c0_g3_i2	110.57	2	3.95577e-45	-0.352177	Downregulated	SA-C vs SA
TRINITY_DN746_c0_g1_i2	109	173	1.64379e-26	0.0311705	Upregulated	SA-C vs SA
TRINITY_DN7480_c0_g1_i1	12496	13	1.19741e-251	-0.596841	Downregulated	SA-C vs SA
TRINITY_DN75_c0_g1_i7	33	5049.12	6.50614e-32	0.422578	Upregulated	SA-C vs SA
TRINITY_DN75_c3_g1_i1	1	3022	1.1752e-45	0.678165	Upregulated	SA-C vs SA
TRINITY_DN753_c0_g2_i3	7333.12	57.36	1.67607e-228	-0.423999	Downregulated	SA-C vs SA
TRINITY_DN753_c0_g2_i4	6668.68	4.63	2.34928e-224	-0.631488	Downregulated	SA-C vs SA
TRINITY_DN753_c0_g2_i5	2919.24	0.01	2.06348e-188	-1.08655	Downregulated	SA-C vs SA
TRINITY_DN7531_c0_g2_i4	641.76	1	3.32295e-122	-0.562228	Downregulated	SA-C vs SA
TRINITY_DN754_c0_g1_i1	50403	9	3.12107428062e-312	-0.747831	Downregulated	SA-C vs SA
TRINITY_DN7546_c0_g3_i2	9	13134.7	1.4814e-82	0.615803	Upregulated	SA-C vs SA
TRINITY_DN758_c0_g1_i3	13045.8	1.35	1.62042e-253	-0.79457	Downregulated	SA-C vs SA
TRINITY_DN758_c0_g1_i7	3378.42	0.65	9.06422e-195	-0.741437	Downregulated	SA-C vs SA
TRINITY_DN7606_c0_g1_i5	594.88	1	7.52684e-119	-0.555729	Downregulated	SA-C vs SA
TRINITY_DN765_c0_g1_i1	1	2009	4.16066e-35	0.643185	Upregulated	SA-C vs SA
TRINITY_DN765_c0_g2_i1	1	1788	1.46101e-32	0.633201	Upregulated	SA-C vs SA
TRINITY_DN766_c0_g1_i1	1601.69	2.5	2.94584e-162	-0.562083	Downregulated	SA-C vs SA
TRINITY_DN766_c0_g1_i5	11442.3	2.5	8.12956e-248	-0.730542	Downregulated	SA-C vs SA
TRINITY_DN78_c0_g1_i6	1	295.84	5.15377e-07	0.479068	Upregulated	SA-C vs SA
TRINITY_DN7812_c0_g1_i1	18	58026	1.50446e-133	0.683699	Upregulated	SA-C vs SA
TRINITY_DN784_c0_g1_i1	2940	1	1.0076e-188	-0.692621	Downregulated	SA-C vs SA
TRINITY_DN785_c0_g1_i1	43	195	3.58408e-06	0.121117	Upregulated	SA-C vs SA
TRINITY_DN791_c0_g2_i3	652.68	1	6.19791e-123	-0.563673	Downregulated	SA-C vs SA
TRINITY_DN7917_c0_g1_i1	1219	1	2.52623e-150	-0.617195	Downregulated	SA-C vs SA
TRINITY_DN792_c0_g1_i1	1	1575	1.68538e-29	0.622333	Upregulated	SA-C vs SA
TRINITY_DN793_c0_g1_i8	77.75	6	1.62221e-33	-0.227883	Downregulated	SA-C vs SA
TRINITY_DN797_c0_g1_i1	617.95	2	1.59937e-120	-0.499603	Downregulated	SA-C vs SA
TRINITY_DN797_c0_g1_i3	4701.23	5	3.77912e-209	-0.59495	Downregulated	SA-C vs SA
TRINITY_DN8_c0_g1_i1	15633	5	2.22849e-261	-0.697893	Downregulated	SA-C vs SA
TRINITY_DN80_c0_g1_i34	18.7	43	5.15833e-06	0.062933	Upregulated	SA-C vs SA
TRINITY_DN80_c0_g1_i52	24.92	2	5.64977e-12	-0.224524	Downregulated	SA-C vs SA
TRINITY_DN80_c0_g1_i80	1869	1	5.5378e-169	-0.65381	Downregulated	SA-C vs SA
TRINITY_DN804_c0_g1_i1	2	18	0.759851	0.179841	Nonsignificant	SA-C vs SA
TRINITY_DN8041_c1_g1_i1	18	783	2.93097e-05	0.314825	Upregulated	SA-C vs SA
TRINITY_DN8045_c1_g2_i1	1	558	9.18169e-13	0.533433	Upregulated	SA-C vs SA
TRINITY_DN81_c1_g1_i12	442.52	2	8.62445e-106	-0.470995	Downregulated	SA-C vs SA
TRINITY_DN81_c1_g1_i8	73.84	1	1.58075e-31	-0.376972	Downregulated	SA-C vs SA
TRINITY_DN8147_c0_g1_i1	2	6415	1.5953e-66	0.683269	Upregulated	SA-C vs SA
TRINITY_DN8148_c0_g3_i4	43021.3	5	2.36071e-305	-0.784623	Downregulated	SA-C vs SA
TRINITY_DN8196_c0_g2_i1	1	4808	1.92778e-59	0.717949	Upregulated	SA-C vs SA
TRINITY_DN82_c0_g1_i1	21	12732	4.63536e-70	0.540543	Upregulated	SA-C vs SA
TRINITY_DN8231_c0_g1_i1	1	20500	2.83692e-111	0.84219	Upregulated	SA-C vs SA
TRINITY_DN8231_c0_g4_i1	13	6096	3.31682e-51	0.518532	Upregulated	SA-C vs SA
TRINITY_DN828_c0_g2_i8	129.37	1	3.69847e-51	-0.425016	Downregulated	SA-C vs SA
TRINITY_DN83_c0_g2_i2	53690.1	45.11	5.603127097e-315	-0.615146	Downregulated	SA-C vs SA
TRINITY_DN83_c0_g2_i5	10924.1	26.89	8.23936e-246	-0.523054	Downregulated	SA-C vs SA
TRINITY_DN83_c0_g3_i1	4617	1	2.30201e-208	-0.731289	Downregulated	SA-C vs SA
TRINITY_DN83_c2_g1_i1	208	1	5.42077e-72	-0.4657	Downregulated	SA-C vs SA
TRINITY_DN8305_c0_g1_i1	61	15492	4.55254e-55	0.465993	Upregulated	SA-C vs SA
TRINITY_DN832_c0_g1_i1	1253	1	1.58101e-151	-0.619551	Downregulated	SA-C vs SA
TRINITY_DN8324_c0_g2_i1	32	6731	8.45513e-41	0.449847	Upregulated	SA-C vs SA
TRINITY_DN835_c0_g5_i1	36	9470	1.45979e-49	0.469006	Upregulated	SA-C vs SA
TRINITY_DN8356_c0_g2_i1	9	1668	1.17042e-20	0.439002	Upregulated	SA-C vs SA
TRINITY_DN8363_c0_g3_i1	46	6926.96	5.5166e-35	0.421214	Upregulated	SA-C vs SA
TRINITY_DN8370_c0_g1_i1	18	6240	1.39849e-47	0.492652	Upregulated	SA-C vs SA
TRINITY_DN8370_c0_g2_i1	17	6446	1.7233e-49	0.500332	Upregulated	SA-C vs SA
TRINITY_DN838_c0_g1_i1	574	1	2.85256e-117	-0.552668	Downregulated	SA-C vs SA
TRINITY_DN839_c0_g2_i1	14	11636.7	7.49762e-73	0.567575	Upregulated	SA-C vs SA
TRINITY_DN840_c0_g1_i3	9808.47	27	3.96766e-241	-0.513475	Downregulated	SA-C vs SA
TRINITY_DN841_c0_g1_i3	15	7	3.94049e-08	-0.0737029	Downregulated	SA-C vs SA
TRINITY_DN849_c0_g1_i1	27	4	4.15962e-13	-0.172007	Downregulated	SA-C vs SA
TRINITY_DN8517_c0_g3_i4	79.19	1	1.62221e-33	-0.382965	Downregulated	SA-C vs SA
TRINITY_DN86_c0_g1_i3	2491.16	1.52	1.66365e-181	-0.642555	Downregulated	SA-C vs SA
TRINITY_DN86_c0_g1_i45	586.45	0.48	3.63253e-118	-0.617389	Downregulated	SA-C vs SA
TRINITY_DN86_c0_g2_i4	19987.9	26	4.66689e-272	-0.577699	Downregulated	SA-C vs SA
TRINITY_DN861_c0_g1_i2	615.59	1	2.16106e-120	-0.558661	Downregulated	SA-C vs SA
TRINITY_DN864_c0_g2_i1	2794	3	1.66986e-186	-0.594134	Downregulated	SA-C vs SA
TRINITY_DN865_c0_g1_i4	17.58	56	5.08771e-05	0.0908556	Upregulated	SA-C vs SA
TRINITY_DN868_c1_g1_i1	1	1767	3.25805e-32	0.632188	Upregulated	SA-C vs SA
TRINITY_DN8689_c4_g1_i1	19	388	0.2637	0.250038	Nonsignificant	SA-C vs SA
TRINITY_DN877_c0_g1_i10	18.78	1.56	1.29729e-09	-0.221575	Downregulated	SA-C vs SA
TRINITY_DN877_c0_g1_i11	672	1	3.33686e-124	-0.566173	Downregulated	SA-C vs SA
TRINITY_DN877_c0_g1_i4	1682.16	3.44	2.15321e-164	-0.538937	Downregulated	SA-C vs SA
TRINITY_DN877_c1_g1_i1	21926	17	4.46613e-276	-0.622029	Downregulated	SA-C vs SA
TRINITY_DN877_c1_g2_i4	2615.5	0.5	1.21864e-183	-0.741986	Downregulated	SA-C vs SA
TRINITY_DN8778_c0_g2_i1	1	1132	4.18139e-23	0.594038	Upregulated	SA-C vs SA
TRINITY_DN88_c0_g7_i1	2	9644	8.13702e-81	0.718198	Upregulated	SA-C vs SA
TRINITY_DN8846_c0_g1_i1	7	344	0.00111828	0.325274	Upregulated	SA-C vs SA
TRINITY_DN888_c0_g1_i1	1	7017	1.17216e-71	0.750339	Upregulated	SA-C vs SA
TRINITY_DN888_c0_g10_i1	26	2274	1.4152e-16	0.374663	Upregulated	SA-C vs SA
TRINITY_DN9_c0_g1_i1	8125.22	149	1.4989e-210	-0.351002	Downregulated	SA-C vs SA
TRINITY_DN9_c0_g1_i17	42022.9	8	2.46738e-304	-0.742344	Downregulated	SA-C vs SA
TRINITY_DN9_c1_g1_i3	432.56	1616	4.22057e-18	0.104512	Upregulated	SA-C vs SA
TRINITY_DN90_c0_g1_i2	613.94	1	3.05172e-120	-0.558431	Downregulated	SA-C vs SA
TRINITY_DN90_c0_g1_i8	9714	3	1.0598e-240	-0.700893	Downregulated	SA-C vs SA
TRINITY_DN902_c0_g2_i2	2	10752.1	1.11434e-84	0.727516	Upregulated	SA-C vs SA
TRINITY_DN903_c0_g2_i2	192.22	3	1.99054e-68	-0.364817	Downregulated	SA-C vs SA
TRINITY_DN91_c0_g5_i1	14	30096	6.00315e-110	0.648985	Upregulated	SA-C vs SA
TRINITY_DN91_c6_g1_i1	1	1516	7.55769e-29	0.619062	Upregulated	SA-C vs SA
TRINITY_DN9132_c0_g1_i2	1	2759.29	3.93768e-43	0.670373	Upregulated	SA-C vs SA
TRINITY_DN9132_c0_g2_i1	10	25028	9.49523e-107	0.662014	Upregulated	SA-C vs SA
TRINITY_DN9174_c1_g1_i1	19	3634	5.41652e-31	0.4417	Upregulated	SA-C vs SA
TRINITY_DN9177_c0_g1_i1	519	1	8.26126e-113	-0.544038	Downregulated	SA-C vs SA
TRINITY_DN918_c0_g2_i2	4186.33	1	4.21724e-204	-0.7229	Downregulated	SA-C vs SA
TRINITY_DN9187_c0_g1_i1	1	163	0.000764908	0.428	Upregulated	SA-C vs SA
TRINITY_DN919_c0_g3_i1	82.31	5.44	6.97886e-35	-0.241161	Downregulated	SA-C vs SA
TRINITY_DN919_c0_g3_i4	85.72	0.26	4.46764e-36	-0.505163	Downregulated	SA-C vs SA
TRINITY_DN919_c0_g3_i5	3996.1	1.77	4.43602e-202	-0.669997	Downregulated	SA-C vs SA
TRINITY_DN919_c0_g3_i9	6659.64	6.53	2.68541e-224	-0.601913	Downregulated	SA-C vs SA
TRINITY_DN92_c0_g1_i1	776.86	2	1.30741e-130	-0.51921	Downregulated	SA-C vs SA
TRINITY_DN92_c0_g2_i2	195.83	2	2.39824e-69	-0.401149	Downregulated	SA-C vs SA
TRINITY_DN936_c0_g1_i3	528.97	1	1.14041e-113	-0.545668	Downregulated	SA-C vs SA
TRINITY_DN9391_c0_g1_i1	4759	3	1.10984e-209	-0.639761	Downregulated	SA-C vs SA
TRINITY_DN940_c0_g1_i6	11	1	8.35118e-06	-0.213846	Downregulated	SA-C vs SA
TRINITY_DN9460_c0_g1_i1	15	239	0.830771	0.228777	Nonsignificant	SA-C vs SA
TRINITY_DN95_c0_g2_i1	8	11851	5.96551e-80	0.617083	Upregulated	SA-C vs SA
TRINITY_DN95_c0_g3_i1	1	7791	3.18818e-75	0.759303	Upregulated	SA-C vs SA
TRINITY_DN950_c0_g1_i1	24156	2	2.78061e-280	-0.813678	Downregulated	SA-C vs SA
TRINITY_DN951_c1_g5_i1	969	1	2.77891e-140	-0.59753	Downregulated	SA-C vs SA
TRINITY_DN9523_c0_g1_i1	2	7488	6.76513e-72	0.696519	Upregulated	SA-C vs SA
TRINITY_DN9551_c0_g1_i1	0.31	82.93	0.000672116	0.470446	Upregulated	SA-C vs SA
TRINITY_DN956_c0_g2_i2	388.69	1	4.94252e-100	-0.519268	Downregulated	SA-C vs SA
TRINITY_DN9630_c1_g1_i2	51	10620.5	3.19489e-46	0.448988	Upregulated	SA-C vs SA
TRINITY_DN9630_c2_g1_i1	1	3889	7.66944e-53	0.699775	Upregulated	SA-C vs SA
TRINITY_DN965_c1_g1_i2	5478	1	8.42959e-216	-0.745939	Downregulated	SA-C vs SA
TRINITY_DN97_c0_g1_i3	1	5227.73	4.78956e-62	0.72512	Upregulated	SA-C vs SA
TRINITY_DN97_c0_g1_i5	13	15187.5	7.40302e-84	0.596739	Upregulated	SA-C vs SA
TRINITY_DN97_c0_g3_i1	14	11518	1.83097e-72	0.566696	Upregulated	SA-C vs SA
TRINITY_DN97_c0_g5_i1	1	2889	1.32091e-44	0.674309	Upregulated	SA-C vs SA
TRINITY_DN9743_c0_g1_i1	12	277	0.189204	0.260537	Nonsignificant	SA-C vs SA
TRINITY_DN9781_c1_g1_i10	13	6.29	4.1078e-07	-0.0706056	Downregulated	SA-C vs SA
TRINITY_DN9781_c1_g1_i2	19	1816.75	8.68198e-16	0.382303	Upregulated	SA-C vs SA
TRINITY_DN9781_c1_g1_i7	5.45	5366.09	7.09105e-56	0.582086	Upregulated	SA-C vs SA
TRINITY_DN9781_c1_g1_i8	0.55	796.22	2.58908e-17	0.615111	Upregulated	SA-C vs SA
TRINITY_DN979_c0_g1_i1	249.81	7	2.53764e-80	-0.314677	Downregulated	SA-C vs SA
TRINITY_DN9797_c0_g3_i1	1	3153	1.16048e-46	0.6818	Upregulated	SA-C vs SA
TRINITY_DN98_c0_g1_i1	8	3798	1.47262e-41	0.51959	Upregulated	SA-C vs SA
TRINITY_DN982_c0_g1_i1	6696	5	1.56845e-224	-0.625252	Downregulated	SA-C vs SA
TRINITY_DN983_c0_g1_i1	11	11	1.47851e-05	-0.00840656	Downregulated	SA-C vs SA
TRINITY_DN9832_c0_g3_i3	3	762.98	1.55865e-13	0.466114	Upregulated	SA-C vs SA
TRINITY_DN9832_c1_g4_i1	1	3337	1.75152e-48	0.68666	Upregulated	SA-C vs SA
TRINITY_DN984_c0_g1_i1	2131	2	1.05292e-174	-0.605664	Downregulated	SA-C vs SA
TRINITY_DN986_c0_g2_i4	398.66	1	3.73848e-101	-0.521438	Downregulated	SA-C vs SA
TRINITY_DN988_c0_g1_i3	1	16895	9.16923e-104	0.82562	Upregulated	SA-C vs SA
TRINITY_DN9990_c0_g3_i1	1	24886.8	6.97187e-119	0.858803	Upregulated	SA-C vs SA
TRINITY_DN10401_c1_g1_i1	1	1	3.28823e-16	-0.00840656	Downregulated	SA-C vs SA
TRINITY_DN10429_c0_g1_i2	1	1	2.94584e-162	-0.00840656	Downregulated	SA-C vs SA
TRINITY_DN10814_c1_g1_i1	9	1	1.20205e-11	-0.196654	Downregulated	SA-C vs SA
TRINITY_DN11193_c0_g2_i1	1	1	3.59641e-99	-0.00840656	Downregulated	SA-C vs SA
TRINITY_DN1153_c0_g1_i2	8	11.14	0.000126105	0.0199605	Upregulated	SA-C vs SA
TRINITY_DN11647_c0_g1_i1	3	4	7.25215e-15	0.0162406	Upregulated	SA-C vs SA
TRINITY_DN119_c0_g1_i4	2	7	4.01333e-80	0.0989238	Upregulated	SA-C vs SA
TRINITY_DN1198_c1_g1_i1	7	15	3.01311e-207	0.0568898	Upregulated	SA-C vs SA
TRINITY_DN121_c1_g1_i2	6.37	3.34	2.23219e-29	-0.0637208	Downregulated	SA-C vs SA
TRINITY_DN12180_c0_g1_i1	3	2	1.53533e-22	-0.0431448	Downregulated	SA-C vs SA
TRINITY_DN12537_c0_g1_i1	1	1	4.84155e-25	-0.00840656	Downregulated	SA-C vs SA
TRINITY_DN12691_c0_g1_i2	1	1	8.29843e-152	-0.00840656	Downregulated	SA-C vs SA
TRINITY_DN13326_c0_g1_i6	1	1	3.90584e-232	-0.00840656	Downregulated	SA-C vs SA
TRINITY_DN13326_c1_g1_i1	1	3	6.95968e-120	0.085717	Upregulated	SA-C vs SA
TRINITY_DN13664_c0_g1_i2	1	1	3.10694e-29	-0.00840656	Downregulated	SA-C vs SA
TRINITY_DN13664_c0_g1_i3	1	1	9.68811e-31	-0.00840656	Downregulated	SA-C vs SA
TRINITY_DN13701_c0_g1_i1	1	2	1.19548e-66	0.0509788	Upregulated	SA-C vs SA
TRINITY_DN13713_c0_g1_i1	1	1	5.79882e-57	-0.00840656	Downregulated	SA-C vs SA
TRINITY_DN13905_c0_g1_i1	1	1	3.26386e-27	-0.00840656	Downregulated	SA-C vs SA
TRINITY_DN14049_c0_g1_i1	2	12	4.33444e-82	0.145102	Upregulated	SA-C vs SA
TRINITY_DN14139_c0_g2_i1	1	1	2.23455e-62	-0.00840656	Downregulated	SA-C vs SA
TRINITY_DN14212_c0_g1_i1	7	1	1.86676e-61	-0.175122	Downregulated	SA-C vs SA
TRINITY_DN14618_c1_g1_i2	0.5	2	4.18556e-105	0.110364	Upregulated	SA-C vs SA
TRINITY_DN14712_c0_g1_i2	1	2	3.93459e-10	0.0509788	Upregulated	SA-C vs SA
TRINITY_DN15015_c0_g1_i2	6.67	5.17	2.557e-89	-0.030232	Downregulated	SA-C vs SA
TRINITY_DN15015_c0_g1_i4	1.33	3.83	4.05453e-103	0.0822106	Upregulated	SA-C vs SA
TRINITY_DN15015_c0_g2_i1	0.66	7.72	9.19588e-114	0.202296	Upregulated	SA-C vs SA
TRINITY_DN15015_c0_g2_i2	1	2	1.24725e-225	0.0509788	Upregulated	SA-C vs SA
TRINITY_DN15015_c0_g2_i7	1.68	1.28	6.16104e-93	-0.0317045	Downregulated	SA-C vs SA
TRINITY_DN15017_c0_g2_i1	3	1	1.58628e-154	-0.10253	Downregulated	SA-C vs SA
TRINITY_DN1523_c0_g1_i1	3	2	0.180027	-0.0431448	Nonsignificant	SA-C vs SA
TRINITY_DN1523_c0_g1_i2	7	7.15	2.27396e-07	-0.00659006	Downregulated	SA-C vs SA
TRINITY_DN1523_c0_g1_i4	4	2	2.40572e-14	-0.0677919	Downregulated	SA-C vs SA
TRINITY_DN1523_c0_g2_i6	4	4	4.04722e-05	-0.00840656	Downregulated	SA-C vs SA
TRINITY_DN1523_c1_g1_i1	1	2	4.40829e-252	0.0509788	Upregulated	SA-C vs SA
TRINITY_DN15286_c0_g1_i1	1	1	1.3552e-06	-0.00840656	Downregulated	SA-C vs SA
TRINITY_DN15554_c0_g2_i1	1	1	2.97315e-204	-0.00840656	Downregulated	SA-C vs SA
TRINITY_DN15788_c0_g1_i1	1	1	1.961319e-317	-0.00840656	Downregulated	SA-C vs SA
TRINITY_DN15947_c1_g1_i1	2	1	5.21705e-47	-0.0677919	Downregulated	SA-C vs SA
TRINITY_DN1609_c0_g1_i1	10	8	1.47729e-82	-0.0275244	Downregulated	SA-C vs SA
TRINITY_DN16484_c0_g1_i2	1	0.73	2.0689e-52	-0.0353694	Downregulated	SA-C vs SA
TRINITY_DN1653_c0_g2_i1	1.16	9.29	6.80378e-67	0.169842	Upregulated	SA-C vs SA
TRINITY_DN16793_c0_g1_i3	5	2	2.18215e-50	-0.0869097	Downregulated	SA-C vs SA
TRINITY_DN168_c0_g1_i2	8	16	6.58918e-53	0.0509788	Upregulated	SA-C vs SA
TRINITY_DN17163_c0_g2_i1	2	1	3.76763e-115	-0.0677919	Downregulated	SA-C vs SA
TRINITY_DN17303_c0_g1_i1	1	3	5.9948e-131	0.085717	Upregulated	SA-C vs SA
TRINITY_DN17303_c0_g2_i1	4	4	4.67392e-211	-0.00840656	Downregulated	SA-C vs SA
TRINITY_DN17871_c0_g2_i1	1	1	1.22522e-165	-0.00840656	Downregulated	SA-C vs SA
TRINITY_DN18182_c1_g1_i2	1	1	0	-0.00840656	Downregulated	SA-C vs SA
TRINITY_DN1846_c0_g2_i1	1	16	3.72617e-32	0.229135	Upregulated	SA-C vs SA
TRINITY_DN18831_c0_g2_i1	1	4	0	0.110364	Upregulated	SA-C vs SA
TRINITY_DN1948_c0_g1_i1	2.53	6.8	1.90692e-97	0.0763006	Upregulated	SA-C vs SA
TRINITY_DN19645_c0_g1_i13	2	5	1.97912e-131	0.0700966	Upregulated	SA-C vs SA
TRINITY_DN19645_c0_g1_i15	1.21	1	3.95577e-45	-0.0247379	Downregulated	SA-C vs SA
TRINITY_DN19645_c0_g1_i8	1	1	1.64379e-26	-0.00840656	Downregulated	SA-C vs SA
TRINITY_DN19645_c3_g1_i4	6	2	1.19741e-251	-0.10253	Downregulated	SA-C vs SA
TRINITY_DN1980_c0_g1_i1	9	10	6.50614e-32	0.000620202	Upregulated	SA-C vs SA
TRINITY_DN20153_c0_g1_i1	2	1	1.1752e-45	-0.0677919	Downregulated	SA-C vs SA
TRINITY_DN20160_c0_g1_i1	2	1	1.67607e-228	-0.0677919	Downregulated	SA-C vs SA
TRINITY_DN20160_c0_g2_i1	2	1	2.34928e-224	-0.0677919	Downregulated	SA-C vs SA
TRINITY_DN20207_c0_g1_i1	1	1	2.06348e-188	-0.00840656	Downregulated	SA-C vs SA
TRINITY_DN20713_c0_g1_i3	1	1	3.32295e-122	-0.00840656	Downregulated	SA-C vs SA
TRINITY_DN20906_c0_g1_i1	6	3	3.12107428062e-312	-0.0677919	Downregulated	SA-C vs SA
TRINITY_DN212_c1_g1_i16	3	1	1.4814e-82	-0.10253	Downregulated	SA-C vs SA
TRINITY_DN21230_c0_g1_i1	8	2	1.62042e-253	-0.127177	Downregulated	SA-C vs SA
TRINITY_DN22056_c0_g1_i1	2	2	9.06422e-195	-0.00840656	Downregulated	SA-C vs SA
TRINITY_DN22116_c0_g2_i1	5	10	7.52684e-119	0.0509788	Upregulated	SA-C vs SA
TRINITY_DN22298_c0_g1_i1	1	1	4.16066e-35	-0.00840656	Downregulated	SA-C vs SA
TRINITY_DN22405_c0_g1_i1	1	1	1.46101e-32	-0.00840656	Downregulated	SA-C vs SA
TRINITY_DN2248_c0_g2_i1	2	1	2.94584e-162	-0.0677919	Downregulated	SA-C vs SA
TRINITY_DN23359_c0_g1_i2	1	2	8.12956e-248	0.0509788	Upregulated	SA-C vs SA
TRINITY_DN24007_c0_g1_i1	1	1	5.15377e-07	-0.00840656	Downregulated	SA-C vs SA
TRINITY_DN2402_c0_g1_i2	5	2	1.50446e-133	-0.0869097	Downregulated	SA-C vs SA
TRINITY_DN24030_c0_g1_i1	1	2	1.0076e-188	0.0509788	Upregulated	SA-C vs SA
TRINITY_DN24047_c0_g1_i1	1	2	3.58408e-06	0.0509788	Upregulated	SA-C vs SA
TRINITY_DN24103_c0_g1_i3	2	2	6.19791e-123	-0.00840656	Downregulated	SA-C vs SA
TRINITY_DN24382_c0_g2_i1	1	9	2.52623e-150	0.179841	Upregulated	SA-C vs SA
TRINITY_DN25116_c0_g1_i1	1	1	1.68538e-29	-0.00840656	Downregulated	SA-C vs SA
TRINITY_DN25184_c0_g1_i1	1	2	1.62221e-33	0.0509788	Upregulated	SA-C vs SA
TRINITY_DN26377_c0_g1_i1	2	2	1.59937e-120	-0.00840656	Downregulated	SA-C vs SA
TRINITY_DN26630_c0_g1_i1	3	8	3.77912e-209	0.0756259	Upregulated	SA-C vs SA
TRINITY_DN27489_c0_g1_i1	1	1	2.22849e-261	-0.00840656	Downregulated	SA-C vs SA
TRINITY_DN27707_c0_g1_i2	2	10	5.15833e-06	0.129482	Upregulated	SA-C vs SA
TRINITY_DN2778_c0_g1_i1	6	0.2	5.64977e-12	-0.299804	Downregulated	SA-C vs SA
TRINITY_DN278_c1_g1_i11	0.26	1.76	5.5378e-169	0.155437	Upregulated	SA-C vs SA
TRINITY_DN28131_c0_g1_i1	2	1	0.759851	-0.0677919	Nonsignificant	SA-C vs SA
TRINITY_DN28252_c0_g1_i1	4	2	2.93097e-05	-0.0677919	Downregulated	SA-C vs SA
TRINITY_DN2895_c0_g1_i2	1	3	9.18169e-13	0.085717	Upregulated	SA-C vs SA
TRINITY_DN290_c0_g2_i1	3	2	8.62445e-106	-0.0431448	Downregulated	SA-C vs SA
TRINITY_DN2932_c0_g2_i2	3	2	1.58075e-31	-0.0431448	Downregulated	SA-C vs SA
TRINITY_DN29716_c0_g1_i1	8	14	1.5953e-66	0.0395385	Upregulated	SA-C vs SA
TRINITY_DN29813_c0_g1_i1	2	1	2.36071e-305	-0.0677919	Downregulated	SA-C vs SA
TRINITY_DN30967_c0_g1_i1	10	1	1.92778e-59	-0.20568	Downregulated	SA-C vs SA
TRINITY_DN31024_c0_g1_i1	1	1	4.63536e-70	-0.00840656	Downregulated	SA-C vs SA
TRINITY_DN31070_c0_g1_i1	1	3	2.83692e-111	0.085717	Upregulated	SA-C vs SA
TRINITY_DN31101_c0_g1_i1	2	2	3.31682e-51	-0.00840656	Downregulated	SA-C vs SA
TRINITY_DN31207_c0_g1_i1	1	1	3.69847e-51	-0.00840656	Downregulated	SA-C vs SA
TRINITY_DN31469_c0_g1_i1	1	1	5.603127097e-315	-0.00840656	Downregulated	SA-C vs SA
TRINITY_DN32066_c0_g1_i1	2	2	8.23936e-246	-0.00840656	Downregulated	SA-C vs SA
TRINITY_DN32072_c0_g1_i1	2	1	2.30201e-208	-0.0677919	Downregulated	SA-C vs SA
TRINITY_DN32188_c0_g1_i1	4	4	5.42077e-72	-0.00840656	Downregulated	SA-C vs SA
TRINITY_DN3225_c1_g1_i1	4	1	4.55254e-55	-0.127177	Downregulated	SA-C vs SA
TRINITY_DN32689_c0_g1_i1	5	7	1.58101e-151	0.0204207	Upregulated	SA-C vs SA
TRINITY_DN328_c0_g5_i1	1	2	8.45513e-41	0.0509788	Upregulated	SA-C vs SA
TRINITY_DN32847_c0_g1_i1	7.11	5	1.45979e-49	-0.0385697	Downregulated	SA-C vs SA
TRINITY_DN33165_c0_g1_i2	3	6	1.17042e-20	0.0509788	Upregulated	SA-C vs SA
TRINITY_DN33822_c0_g1_i1	8	12	5.5166e-35	0.0263317	Upregulated	SA-C vs SA
TRINITY_DN34092_c0_g1_i1	1	1	1.39849e-47	-0.00840656	Downregulated	SA-C vs SA
TRINITY_DN3421_c0_g2_i5	0.18	2.17	1.7233e-49	0.204883	Upregulated	SA-C vs SA
TRINITY_DN35297_c0_g1_i1	1	1	2.85256e-117	-0.00840656	Downregulated	SA-C vs SA
TRINITY_DN36540_c0_g1_i1	1	2	7.49762e-73	0.0509788	Upregulated	SA-C vs SA
TRINITY_DN37154_c0_g1_i1	1	1	3.96766e-241	-0.00840656	Downregulated	SA-C vs SA
TRINITY_DN37522_c0_g1_i1	1	1	3.94049e-08	-0.00840656	Downregulated	SA-C vs SA
TRINITY_DN37995_c0_g1_i1	2	2	4.15962e-13	-0.00840656	Downregulated	SA-C vs SA
TRINITY_DN38479_c0_g1_i1	1	1	1.62221e-33	-0.00840656	Downregulated	SA-C vs SA
TRINITY_DN38513_c0_g1_i1	1	1	1.66365e-181	-0.00840656	Downregulated	SA-C vs SA
TRINITY_DN38648_c0_g1_i1	1	2	3.63253e-118	0.0509788	Upregulated	SA-C vs SA
TRINITY_DN38685_c0_g1_i2	3	1	4.66689e-272	-0.10253	Downregulated	SA-C vs SA
TRINITY_DN38906_c0_g1_i1	1	4	2.16106e-120	0.110364	Upregulated	SA-C vs SA
TRINITY_DN38963_c0_g1_i1	1	1	1.66986e-186	-0.00840656	Downregulated	SA-C vs SA
TRINITY_DN39322_c0_g1_i1	4	1	5.08771e-05	-0.127177	Downregulated	SA-C vs SA
TRINITY_DN39400_c0_g1_i1	1	1	3.25805e-32	-0.00840656	Downregulated	SA-C vs SA
TRINITY_DN39608_c0_g1_i1	1	1	0.2637	-0.00840656	Nonsignificant	SA-C vs SA
TRINITY_DN40951_c0_g1_i1	6	16	1.29729e-09	0.075626	Upregulated	SA-C vs SA
TRINITY_DN41056_c0_g1_i1	1	1	3.33686e-124	-0.00840656	Downregulated	SA-C vs SA
TRINITY_DN41137_c0_g1_i1	1	1	2.15321e-164	-0.00840656	Downregulated	SA-C vs SA
TRINITY_DN41611_c0_g1_i1	2	5	4.46613e-276	0.0700966	Upregulated	SA-C vs SA
TRINITY_DN41617_c0_g1_i1	1	11	1.21864e-183	0.197033	Upregulated	SA-C vs SA
TRINITY_DN41995_c0_g1_i1	2	1	4.18139e-23	-0.0677919	Downregulated	SA-C vs SA
TRINITY_DN42156_c0_g1_i1	8	3	8.13702e-81	-0.0924391	Downregulated	SA-C vs SA
TRINITY_DN42690_c0_g1_i1	1	1	0.00111828	-0.00840656	Downregulated	SA-C vs SA
TRINITY_DN42769_c0_g1_i1	2	3	1.17216e-71	0.0263316	Upregulated	SA-C vs SA
TRINITY_DN42793_c0_g1_i1	4	1	1.4152e-16	-0.127177	Downregulated	SA-C vs SA
TRINITY_DN42916_c0_g1_i1	2	1	1.4989e-210	-0.0677919	Downregulated	SA-C vs SA
TRINITY_DN43411_c0_g1_i1	1	1	2.46738e-304	-0.00840656	Downregulated	SA-C vs SA
TRINITY_DN43420_c0_g1_i1	1	2	4.22057e-18	0.0509788	Upregulated	SA-C vs SA
TRINITY_DN43434_c0_g1_i1	1	3	3.05172e-120	0.085717	Upregulated	SA-C vs SA
TRINITY_DN43745_c0_g1_i1	4	1	1.0598e-240	-0.127177	Downregulated	SA-C vs SA
TRINITY_DN44151_c0_g1_i1	5	2	1.11434e-84	-0.0869097	Downregulated	SA-C vs SA
TRINITY_DN44300_c0_g1_i1	1	1	1.99054e-68	-0.00840656	Downregulated	SA-C vs SA
TRINITY_DN45793_c0_g1_i1	1	2	6.00315e-110	0.0509788	Upregulated	SA-C vs SA
TRINITY_DN46005_c0_g1_i1	3	1	7.55769e-29	-0.10253	Downregulated	SA-C vs SA
TRINITY_DN46154_c0_g1_i1	1	1	3.93768e-43	-0.00840656	Downregulated	SA-C vs SA
TRINITY_DN46408_c0_g1_i1	1	1	9.49523e-107	-0.00840656	Downregulated	SA-C vs SA
TRINITY_DN46551_c0_g1_i1	1	5	5.41652e-31	0.129482	Upregulated	SA-C vs SA
TRINITY_DN46953_c0_g1_i1	1	1	8.26126e-113	-0.00840656	Downregulated	SA-C vs SA
TRINITY_DN47220_c0_g1_i1	3	1	4.21724e-204	-0.10253	Downregulated	SA-C vs SA
TRINITY_DN47562_c0_g1_i1	1	1	0.000764908	-0.00840656	Downregulated	SA-C vs SA
TRINITY_DN47668_c0_g1_i1	3	1	6.97886e-35	-0.10253	Downregulated	SA-C vs SA
TRINITY_DN48557_c0_g1_i1	1	2	4.46764e-36	0.0509788	Upregulated	SA-C vs SA
TRINITY_DN48588_c0_g1_i1	8	12	4.43602e-202	0.0263317	Upregulated	SA-C vs SA
TRINITY_DN5_c0_g1_i67	1	7.54	2.68541e-224	0.164676	Upregulated	SA-C vs SA
TRINITY_DN50060_c0_g1_i2	4	2	1.30741e-130	-0.0677919	Downregulated	SA-C vs SA
TRINITY_DN50649_c0_g1_i1	1	1	2.39824e-69	-0.00840656	Downregulated	SA-C vs SA
TRINITY_DN50677_c0_g1_i1	3	1	1.14041e-113	-0.10253	Downregulated	SA-C vs SA
TRINITY_DN50783_c0_g1_i1	2	1	1.10984e-209	-0.0677919	Downregulated	SA-C vs SA
TRINITY_DN51273_c0_g1_i1	3	2	8.35118e-06	-0.0431448	Downregulated	SA-C vs SA
TRINITY_DN51368_c0_g1_i1	3	1	0.830771	-0.10253	Nonsignificant	SA-C vs SA
TRINITY_DN51406_c0_g1_i1	5	6	5.96551e-80	0.00721383	Upregulated	SA-C vs SA
TRINITY_DN51911_c0_g1_i1	7	1	3.18818e-75	-0.175122	Downregulated	SA-C vs SA
TRINITY_DN51938_c0_g1_i1	3	7	2.78061e-280	0.0641856	Upregulated	SA-C vs SA
TRINITY_DN52199_c0_g1_i1	1	2	2.77891e-140	0.0509788	Upregulated	SA-C vs SA
TRINITY_DN52278_c0_g1_i1	1	1	6.76513e-72	-0.00840656	Downregulated	SA-C vs SA
TRINITY_DN52288_c0_g1_i1	1	1	0.000672116	-0.00840656	Downregulated	SA-C vs SA
TRINITY_DN52315_c0_g1_i1	7	1	4.94252e-100	-0.175122	Downregulated	SA-C vs SA
TRINITY_DN5285_c0_g1_i1	1	1	3.19489e-46	-0.00840656	Downregulated	SA-C vs SA
TRINITY_DN5285_c0_g1_i5	1	2	7.66944e-53	0.0509788	Upregulated	SA-C vs SA
TRINITY_DN5285_c0_g2_i2	4	3	8.42959e-216	-0.0330537	Downregulated	SA-C vs SA
TRINITY_DN52977_c0_g1_i1	2	1	4.78956e-62	-0.0677919	Downregulated	SA-C vs SA
TRINITY_DN53785_c0_g1_i1	1	1	7.40302e-84	-0.00840656	Downregulated	SA-C vs SA
TRINITY_DN5478_c0_g4_i1	2	4	1.83097e-72	0.0509788	Upregulated	SA-C vs SA
TRINITY_DN5648_c0_g1_i2	2	2	1.32091e-44	-0.00840656	Downregulated	SA-C vs SA
TRINITY_DN5648_c0_g2_i2	3	1	0.189204	-0.10253	Nonsignificant	SA-C vs SA
TRINITY_DN6208_c0_g4_i1	1	1	4.1078e-07	-0.00840656	Downregulated	SA-C vs SA
TRINITY_DN624_c0_g3_i1	4	1	8.68198e-16	-0.127177	Downregulated	SA-C vs SA
TRINITY_DN6334_c0_g1_i1	1	1	7.09105e-56	-0.00840656	Downregulated	SA-C vs SA
TRINITY_DN6627_c0_g1_i1	1	2	2.58908e-17	0.0509788	Upregulated	SA-C vs SA
TRINITY_DN7087_c0_g1_i2	2	1	2.53764e-80	-0.0677919	Downregulated	SA-C vs SA
TRINITY_DN723_c0_g1_i1	7	17	1.16048e-46	0.0676131	Upregulated	SA-C vs SA
TRINITY_DN7260_c1_g1_i1	8	11.86	1.47262e-41	0.0253262	Upregulated	SA-C vs SA
TRINITY_DN8374_c0_g1_i1	3	1	1.56845e-224	-0.10253	Downregulated	SA-C vs SA
TRINITY_DN8542_c0_g1_i2	8	1	1.47851e-05	-0.186563	Downregulated	SA-C vs SA
TRINITY_DN8798_c0_g2_i1	1	2	1.55865e-13	0.0509788	Upregulated	SA-C vs SA
TRINITY_DN9096_c0_g1_i1	8	4	1.75152e-48	-0.0677919	Downregulated	SA-C vs SA
TRINITY_DN9724_c0_g1_i2	1	1	1.05292e-174	-0.00840656	Downregulated	SA-C vs SA
TRINITY_DN9830_c0_g1_i5	1	2	3.73848e-101	0.0509788	Upregulated	SA-C vs SA
TRINITY_DN9830_c0_g2_i1	0.04	3.04	9.16923e-104	0.362627	Upregulated	SA-C vs SA
TRINITY_DN9830_c0_g2_i3	2.96	3.96	6.97187e-119	0.0165295	Upregulated	SA-C vs SA
TRINITY_DN9830_c2_g1_i1	1	3	1.10984e-209	0.085717	Upregulated	SA-C vs SA
TRINITY_DN9867_c0_g1_i2	1	1	8.35118e-06	-0.00840656	Downregulated	SA-C vs SA
TRINITY_DN9924_c0_g1_i2	1	1	0.830771	-0.00840656	Nonsignificant	SA-C vs SA
TRINITY_DN999_c0_g1_i1	10	2	5.96551e-80	-0.146295	Downregulated	SA-C vs SA

## Sheet: P-value-sig
gene_id	SA	SA-C	Pvalue	logFC	category	condition
TRINITY_DN0_c0_g1_i10	84657.4	37	0	-0.671141	Downregulated	SA-C vs SA
TRINITY_DN0_c0_g1_i14	175.69	13712.5	4.5489e-25	0.364908	Upregulated	SA-C vs SA
TRINITY_DN0_c0_g1_i19	5153.8	14232	1.04245e-28	0.0786186	Upregulated	SA-C vs SA
TRINITY_DN0_c0_g1_i20	25.01	858.54	0.000325474	0.294537	Upregulated	SA-C vs SA
TRINITY_DN0_c0_g1_i22	389.68	7.84	3.2732e-100	-0.34306	Downregulated	SA-C vs SA
TRINITY_DN1_c13_g1_i1	27	83451	1.24793e-141	0.680093	Upregulated	SA-C vs SA
TRINITY_DN10_c0_g1_i18	125.62	1262.29	0.0307543	0.189282	Upregulated	SA-C vs SA
TRINITY_DN10_c1_g1_i2	15	1	1.26331e-07	-0.240419	Downregulated	SA-C vs SA
TRINITY_DN10_c3_g1_i6	2	747	1.42611e-14	0.499039	Upregulated	SA-C vs SA
TRINITY_DN1000_c0_g1_i1	3161	3	7.04907e-192	-0.604707	Downregulated	SA-C vs SA
TRINITY_DN1000_c0_g5_i1	1292	3	7.0869e-153	-0.528054	Downregulated	SA-C vs SA
TRINITY_DN1000_c1_g1_i1	393.45	1	1.76963e-100	-0.52031	Downregulated	SA-C vs SA
TRINITY_DN1001_c0_g1_i1	6420.16	2	1.06451e-222	-0.700151	Downregulated	SA-C vs SA
TRINITY_DN10039_c1_g1_i1	138	1	5.15309e-54	-0.430549	Downregulated	SA-C vs SA
TRINITY_DN1004_c0_g3_i1	21	47997	5.83444e-123	0.654235	Upregulated	SA-C vs SA
TRINITY_DN1004_c1_g1_i1	14	2634	1.24982e-26	0.440291	Upregulated	SA-C vs SA
TRINITY_DN1008_c0_g1_i1	346.16	2	8.49857e-95	-0.449954	Downregulated	SA-C vs SA
TRINITY_DN1012_c0_g1_i7	9327.74	7	6.1118e-239	-0.624824	Downregulated	SA-C vs SA
TRINITY_DN10131_c0_g2_i1	1729	1	1.36278e-165	-0.647139	Downregulated	SA-C vs SA
TRINITY_DN102_c0_g1_i2	59	28647	5.39769e-79	0.521516	Upregulated	SA-C vs SA
TRINITY_DN102_c0_g4_i1	1	9827	2.27562e-83	0.779194	Upregulated	SA-C vs SA
TRINITY_DN102_c1_g2_i1	37	7314	9.03448e-41	0.444525	Upregulated	SA-C vs SA
TRINITY_DN102_c1_g3_i1	3	29216	5.85559e-122	0.77842	Upregulated	SA-C vs SA
TRINITY_DN10211_c0_g3_i2	1509.33	3	1.17573e-159	-0.541374	Downregulated	SA-C vs SA
TRINITY_DN10323_c0_g1_i3	810.75	13	1.61397e-132	-0.362502	Downregulated	SA-C vs SA
TRINITY_DN1033_c0_g2_i2	4	39317	1.10787e-132	0.779214	Upregulated	SA-C vs SA
TRINITY_DN1044_c0_g1_i5	159511	278	0	-0.552635	Downregulated	SA-C vs SA
TRINITY_DN105_c0_g1_i4	1137	2058.22	3.82527e-40	0.0424371	Upregulated	SA-C vs SA
TRINITY_DN105_c9_g1_i1	18	12295	3.59226e-71	0.550758	Upregulated	SA-C vs SA
TRINITY_DN10531_c0_g1_i2	1218.03	1	2.75448e-150	-0.617126	Downregulated	SA-C vs SA
TRINITY_DN10531_c0_g3_i1	22750	7	1.11855e-277	-0.70121	Downregulated	SA-C vs SA
TRINITY_DN1058_c0_g1_i1	1	3939	2.66252e-53	0.700869	Upregulated	SA-C vs SA
TRINITY_DN106_c0_g1_i5	14	51.66	0.00122165	0.103453	Upregulated	SA-C vs SA
TRINITY_DN106_c0_g1_i8	10	1211.67	2.64428e-14	0.402591	Upregulated	SA-C vs SA
TRINITY_DN106_c0_g2_i1	29	30306.2	8.19161e-98	0.58719	Upregulated	SA-C vs SA
TRINITY_DN106_c0_g2_i3	7	5511.52	3.12584e-54	0.562933	Upregulated	SA-C vs SA
TRINITY_DN10628_c0_g1_i1	265.83	1	5.15689e-83	-0.486718	Downregulated	SA-C vs SA
TRINITY_DN10628_c1_g1_i1	3098	2	5.32028e-191	-0.63772	Downregulated	SA-C vs SA
TRINITY_DN1067_c0_g1_i3	116.88	128	2.09288e-34	-0.000620202	Downregulated	SA-C vs SA
TRINITY_DN1069_c0_g1_i1	298.15	2	3.85323e-88	-0.437163	Downregulated	SA-C vs SA
TRINITY_DN1069_c0_g2_i1	583	1	5.98818e-118	-0.554001	Downregulated	SA-C vs SA
TRINITY_DN107_c0_g3_i1	6	1329	3.70713e-19	0.454274	Upregulated	SA-C vs SA
TRINITY_DN10775_c0_g1_i1	5	1324.48	4.47556e-20	0.469603	Upregulated	SA-C vs SA
TRINITY_DN10869_c0_g1_i1	1	195	0.000158383	0.443357	Upregulated	SA-C vs SA
TRINITY_DN1090_c0_g1_i1	15732.9	18.02	1.17339e-261	-0.5886	Downregulated	SA-C vs SA
TRINITY_DN1090_c0_g1_i3	11003.1	16.98	4.0326e-246	-0.563057	Downregulated	SA-C vs SA
TRINITY_DN10914_c0_g4_i1	17	12627	4.78717e-73	0.557938	Upregulated	SA-C vs SA
TRINITY_DN10932_c2_g1_i2	10875.7	4	1.29775e-245	-0.685924	Downregulated	SA-C vs SA
TRINITY_DN110_c0_g1_i2	793.93	1	1.51562e-131	-0.580458	Downregulated	SA-C vs SA
TRINITY_DN11120_c2_g1_i1	1	1129	4.97991e-23	0.59381	Upregulated	SA-C vs SA
TRINITY_DN1115_c0_g1_i2	1062	4	2.65733e-144	-0.486611	Downregulated	SA-C vs SA
TRINITY_DN11152_c0_g1_i9	22.06	1	8.24314e-11	-0.273465	Downregulated	SA-C vs SA
TRINITY_DN112_c0_g1_i1	1893.34	1	1.53087e-169	-0.654918	Downregulated	SA-C vs SA
TRINITY_DN112_c0_g1_i5	2289.93	1	7.72552e-178	-0.671212	Downregulated	SA-C vs SA
TRINITY_DN112_c0_g1_i9	24.68	1	5.64977e-12	-0.28308	Downregulated	SA-C vs SA
TRINITY_DN113_c0_g2_i2	88	51822	1.77697e-91	0.538048	Upregulated	SA-C vs SA
TRINITY_DN113_c0_g3_i5	5602.99	7.88	8.7376e-217	-0.571011	Downregulated	SA-C vs SA
TRINITY_DN113_c0_g3_i6	181.25	0.12	9.57523e-66	-0.635559	Downregulated	SA-C vs SA
TRINITY_DN1135_c0_g1_i1	25	20	1.9438e-12	-0.0275244	Downregulated	SA-C vs SA
TRINITY_DN11398_c0_g1_i2	4170.19	2	6.18502e-204	-0.663183	Downregulated	SA-C vs SA
TRINITY_DN114_c0_g1_i5	7274.94	2	3.90844e-228	-0.710859	Downregulated	SA-C vs SA
TRINITY_DN11408_c1_g1_i1	51	421	0.0100801	0.172437	Upregulated	SA-C vs SA
TRINITY_DN1145_c0_g2_i3	2701	5	4.91869e-185	-0.547468	Downregulated	SA-C vs SA
TRINITY_DN1147_c0_g1_i1	1764	1	1.83969e-166	-0.648856	Downregulated	SA-C vs SA
TRINITY_DN115_c0_g2_i3	1	305.62	4.27364e-07	0.481855	Upregulated	SA-C vs SA
TRINITY_DN11549_c0_g2_i1	690.5	1	2.27571e-125	-0.568499	Downregulated	SA-C vs SA
TRINITY_DN11567_c0_g2_i1	1	3196	4.37153e-47	0.682961	Upregulated	SA-C vs SA
TRINITY_DN11580_c0_g1_i1	16	1670	5.81167e-16	0.38981	Upregulated	SA-C vs SA
TRINITY_DN116_c0_g1_i11	3.85	2760.75	8.62463e-38	0.554922	Upregulated	SA-C vs SA
TRINITY_DN116_c0_g1_i13	4.15	10759.2	1.23287e-81	0.665034	Upregulated	SA-C vs SA
TRINITY_DN11600_c0_g1_i1	11	932	4.82641e-10	0.371942	Upregulated	SA-C vs SA
TRINITY_DN11616_c0_g1_i1	16	1	3.94049e-08	-0.245948	Downregulated	SA-C vs SA
TRINITY_DN11637_c0_g2_i1	13	414	0.0111144	0.288107	Upregulated	SA-C vs SA
TRINITY_DN11656_c0_g1_i1	3314	6	6.14303e-194	-0.549371	Downregulated	SA-C vs SA
TRINITY_DN11667_c0_g3_i1	3.05	28741.4	2.82965e-121	0.775601	Upregulated	SA-C vs SA
TRINITY_DN11667_c0_g3_i2	28.95	32746.6	5.76428e-101	0.593973	Upregulated	SA-C vs SA
TRINITY_DN1176_c0_g1_i1	7	2617	1.21059e-32	0.499121	Upregulated	SA-C vs SA
TRINITY_DN1177_c0_g1_i2	1	2709.8	1.43047e-42	0.668822	Upregulated	SA-C vs SA
TRINITY_DN11902_c0_g2_i1	14	2	2.27396e-07	-0.175122	Downregulated	SA-C vs SA
TRINITY_DN1194_c2_g5_i1	1	1363	1.69686e-26	0.609948	Upregulated	SA-C vs SA
TRINITY_DN11980_c0_g1_i1	1	11108	9.01414e-88	0.789692	Upregulated	SA-C vs SA
TRINITY_DN12_c0_g2_i1	14	11335	7.41227e-72	0.565324	Upregulated	SA-C vs SA
TRINITY_DN12_c0_g5_i1	18	14176	2.07885e-76	0.562954	Upregulated	SA-C vs SA
TRINITY_DN12_c4_g1_i1	51	26702	6.65715e-80	0.527976	Upregulated	SA-C vs SA
TRINITY_DN12015_c0_g1_i1	42281.3	1.42	1.33962e-304	-0.890982	Downregulated	SA-C vs SA
TRINITY_DN12015_c0_g1_i2	54.45	0.58	6.51625e-24	-0.397543	Downregulated	SA-C vs SA
TRINITY_DN121_c1_g1_i3	844.63	5.47573e+06	9.75518e-206	0.743557	Upregulated	SA-C vs SA
TRINITY_DN1213_c2_g1_i1	1	131	0.00408027	0.409276	Upregulated	SA-C vs SA
TRINITY_DN122_c1_g1_i2	1	1353	2.32372e-26	0.609317	Upregulated	SA-C vs SA
TRINITY_DN12202_c0_g1_i1	5	36716	1.65073e-128	0.754232	Upregulated	SA-C vs SA
TRINITY_DN123_c0_g1_i1	1	17623	4.20417e-105	0.829234	Upregulated	SA-C vs SA
TRINITY_DN124_c0_g1_i18	50.96	57147.7	8.33714e-111	0.593233	Upregulated	SA-C vs SA
TRINITY_DN124_c0_g1_i2	2.71	21950.8	1.71657e-110	0.762635	Upregulated	SA-C vs SA
TRINITY_DN124_c0_g1_i28	13.35	50588.2	1.42119e-132	0.697552	Upregulated	SA-C vs SA
TRINITY_DN124_c0_g1_i5	61.98	39843.4	7.28292e-91	0.545559	Upregulated	SA-C vs SA
TRINITY_DN124_c1_g1_i1	3	23252	7.4036e-113	0.758859	Upregulated	SA-C vs SA
TRINITY_DN12401_c0_g3_i1	44	15291	2.65138e-62	0.492863	Upregulated	SA-C vs SA
TRINITY_DN1244_c0_g2_i1	32	16014	8.41758e-71	0.524105	Upregulated	SA-C vs SA
TRINITY_DN1244_c1_g1_i1	1	7491	9.71596e-74	0.755939	Upregulated	SA-C vs SA
TRINITY_DN12487_c0_g1_i1	18444	4	1.46009e-268	-0.731178	Downregulated	SA-C vs SA
TRINITY_DN125_c0_g1_i12	23233.4	2	1.37003e-278	-0.810341	Downregulated	SA-C vs SA
TRINITY_DN126_c1_g1_i1	175	2	2.85272e-64	-0.391514	Downregulated	SA-C vs SA
TRINITY_DN12600_c0_g6_i1	29	30662	2.72751e-98	0.58819	Upregulated	SA-C vs SA
TRINITY_DN12603_c0_g1_i2	320.57	0.9	1.96687e-91	-0.511786	Downregulated	SA-C vs SA
TRINITY_DN12603_c0_g1_i4	4709.43	0.61	3.19722e-209	-0.775336	Downregulated	SA-C vs SA
TRINITY_DN1261_c0_g1_i1	5	5147	9.61976e-55	0.585898	Upregulated	SA-C vs SA
TRINITY_DN1262_c0_g1_i1	11	44510	2.78006e-129	0.703173	Upregulated	SA-C vs SA
TRINITY_DN1262_c0_g2_i1	2	29367	6.35314e-124	0.8136	Upregulated	SA-C vs SA
TRINITY_DN1262_c0_g3_i1	17	28975	1.43805e-105	0.629099	Upregulated	SA-C vs SA
TRINITY_DN1262_c0_g5_i1	47	48717	2.34579e-106	0.586489	Upregulated	SA-C vs SA
TRINITY_DN1262_c0_g6_i1	1	3203	3.66416e-47	0.683148	Upregulated	SA-C vs SA
TRINITY_DN1262_c0_g7_i1	1	5567	6.41272e-64	0.730507	Upregulated	SA-C vs SA
TRINITY_DN1262_c0_g8_i1	781	5837476	7.7803e-212	0.755749	Upregulated	SA-C vs SA
TRINITY_DN1262_c11_g1_i1	3	11393	3.35169e-85	0.697739	Upregulated	SA-C vs SA
TRINITY_DN1263_c0_g1_i1	1	248	6.1327e-06	0.463956	Upregulated	SA-C vs SA
TRINITY_DN1264_c0_g2_i1	2536	4	2.72967e-182	-0.561186	Downregulated	SA-C vs SA
TRINITY_DN12676_c0_g2_i1	622.1	1	8.06549e-121	-0.559562	Downregulated	SA-C vs SA
TRINITY_DN12680_c0_g3_i1	5	2368	1.87101e-32	0.519382	Upregulated	SA-C vs SA
TRINITY_DN127_c0_g3_i2	7.65	4585.4	3.71443e-47	0.539564	Upregulated	SA-C vs SA
TRINITY_DN127_c0_g3_i3	22.35	2550	7.67485e-21	0.397438	Upregulated	SA-C vs SA
TRINITY_DN127_c0_g6_i1	1	1745	7.3096e-32	0.631115	Upregulated	SA-C vs SA
TRINITY_DN1278_c0_g1_i1	36	180	5.78214e-05	0.129482	Upregulated	SA-C vs SA
TRINITY_DN128_c2_g1_i1	92	3	1.71244e-38	-0.301687	Downregulated	SA-C vs SA
TRINITY_DN129_c0_g2_i1	35549.2	3	4.57194e-297	-0.812043	Downregulated	SA-C vs SA
TRINITY_DN1292_c0_g2_i1	724	1	1.74386e-127	-0.572558	Downregulated	SA-C vs SA
TRINITY_DN1296_c0_g1_i1	1	5847	1.05098e-65	0.734711	Upregulated	SA-C vs SA
TRINITY_DN13_c0_g3_i2	18	22783.5	6.42608e-95	0.603606	Upregulated	SA-C vs SA
TRINITY_DN13_c0_g4_i2	0.09	1442.56	1.50195e-31	0.821108	Upregulated	SA-C vs SA
TRINITY_DN13_c0_g4_i3	0.91	529.44	6.36484e-12	0.537011	Upregulated	SA-C vs SA
TRINITY_DN13_c0_g5_i1	7	6869	1.81495e-61	0.581797	Upregulated	SA-C vs SA
TRINITY_DN13_c0_g6_i1	5	5127	1.37052e-54	0.585564	Upregulated	SA-C vs SA
TRINITY_DN13_c1_g4_i1	18	8040	5.69463e-56	0.514366	Upregulated	SA-C vs SA
TRINITY_DN1304_c0_g1_i3	19	3	1.29729e-09	-0.166548	Downregulated	SA-C vs SA
TRINITY_DN13047_c0_g1_i1	13	5484.27	7.68972e-48	0.509472	Upregulated	SA-C vs SA
TRINITY_DN13095_c0_g1_i1	1	2906	2.13262e-44	0.674811	Upregulated	SA-C vs SA
TRINITY_DN1310_c0_g1_i2	10	8187	4.23031e-64	0.566277	Upregulated	SA-C vs SA
TRINITY_DN1320_c0_g1_i1	2322.4	2	1.90298e-178	-0.613033	Downregulated	SA-C vs SA
TRINITY_DN1323_c0_g1_i1	23	98108.6	1.09241e-151	0.707694	Upregulated	SA-C vs SA
TRINITY_DN1323_c0_g3_i1	17	1459.39	4.06738e-13	0.373066	Upregulated	SA-C vs SA
TRINITY_DN1323_c4_g1_i1	16	5545	2.01292e-45	0.492626	Upregulated	SA-C vs SA
TRINITY_DN1325_c0_g2_i1	9	26024	1.8925e-109	0.674384	Upregulated	SA-C vs SA
TRINITY_DN1326_c0_g1_i2	2	3765	6.23278e-50	0.637613	Upregulated	SA-C vs SA
TRINITY_DN1326_c1_g2_i1	8	8941.25	1.68425e-69	0.592945	Upregulated	SA-C vs SA
TRINITY_DN133_c0_g1_i4	26	3.02	1.17118e-12	-0.192851	Downregulated	SA-C vs SA
TRINITY_DN133_c0_g2_i3	13	4487	1.06246e-41	0.492277	Upregulated	SA-C vs SA
TRINITY_DN1342_c0_g1_i3	402.4	6	1.56914e-101	-0.368729	Downregulated	SA-C vs SA
TRINITY_DN1344_c0_g1_i1	4383.85	1	4.12109e-206	-0.72685	Downregulated	SA-C vs SA
TRINITY_DN135_c0_g1_i14	15358.1	997	1.515e-172	-0.242698	Downregulated	SA-C vs SA
TRINITY_DN135_c4_g1_i3	339	1	7.07188e-94	-0.507549	Downregulated	SA-C vs SA
TRINITY_DN13536_c0_g1_i1	29	34	4.72798e-12	0.00522131	Upregulated	SA-C vs SA
TRINITY_DN13582_c0_g1_i1	14	818	3.52213e-07	0.340103	Upregulated	SA-C vs SA
TRINITY_DN13613_c0_g2_i3	1	1897.88	7.72078e-34	0.63831	Upregulated	SA-C vs SA
TRINITY_DN13613_c1_g1_i2	5	21610	3.28282e-107	0.708819	Upregulated	SA-C vs SA
TRINITY_DN1367_c1_g1_i8	646.9	4.69	1.52069e-122	-0.430506	Downregulated	SA-C vs SA
TRINITY_DN1377_c0_g1_i11	248.76	0.35	4.87294e-80	-0.570975	Downregulated	SA-C vs SA
TRINITY_DN1377_c0_g1_i5	8466.21	2.65	1.00449e-234	-0.699742	Downregulated	SA-C vs SA
TRINITY_DN1380_c0_g1_i3	1010.48	6	4.21944e-142	-0.447613	Downregulated	SA-C vs SA
TRINITY_DN13829_c1_g3_i3	9928.66	5	1.18227e-241	-0.659	Downregulated	SA-C vs SA
TRINITY_DN14_c1_g1_i11	92.89	34013.5	3.94119e-73	0.497341	Upregulated	SA-C vs SA
TRINITY_DN14_c1_g1_i3	63.11	68764.5	7.32196e-113	0.590767	Upregulated	SA-C vs SA
TRINITY_DN14_c1_g1_i4	14	2739	1.71805e-27	0.44364	Upregulated	SA-C vs SA
TRINITY_DN14_c1_g1_i8	1	13490	4.37016e-95	0.806337	Upregulated	SA-C vs SA
TRINITY_DN14_c1_g3_i1	11	6489	2.91208e-55	0.538197	Upregulated	SA-C vs SA
TRINITY_DN14_c1_g5_i1	1	16336	2.13189e-102	0.822737	Upregulated	SA-C vs SA
TRINITY_DN1404_c0_g1_i1	17	19	5.82615e-08	0.0011227	Upregulated	SA-C vs SA
TRINITY_DN14049_c0_g2_i1	12	2	2.47519e-06	-0.161915	Downregulated	SA-C vs SA
TRINITY_DN141_c0_g3_i2	11	747.55	1.30234e-07	0.353048	Upregulated	SA-C vs SA
TRINITY_DN141_c1_g1_i1	18	15936	5.93843e-81	0.572981	Upregulated	SA-C vs SA
TRINITY_DN141_c1_g2_i1	1	14295.1	2.11037e-97	0.811304	Upregulated	SA-C vs SA
TRINITY_DN141_c1_g8_i1	21	5965	7.43069e-44	0.475584	Upregulated	SA-C vs SA
TRINITY_DN14192_c0_g2_i1	2299	3	5.17499e-178	-0.577427	Downregulated	SA-C vs SA
TRINITY_DN142_c0_g2_i1	26	78699	6.42252e-140	0.678303	Upregulated	SA-C vs SA
TRINITY_DN14395_c1_g1_i1	307.37	2.5	1.70323e-89	-0.420654	Downregulated	SA-C vs SA
TRINITY_DN14395_c1_g1_i4	4945.63	2.5	2.34052e-211	-0.658677	Downregulated	SA-C vs SA
TRINITY_DN146_c0_g2_i3	7.09	480.54	9.40606e-06	0.352818	Upregulated	SA-C vs SA
TRINITY_DN146_c1_g4_i1	24	12853	6.02976e-68	0.529913	Upregulated	SA-C vs SA
TRINITY_DN1461_c0_g1_i1	916	3	7.97442e-138	-0.498588	Downregulated	SA-C vs SA
TRINITY_DN1461_c1_g1_i2	6060.57	23	3.29462e-220	-0.485964	Downregulated	SA-C vs SA
TRINITY_DN1461_c3_g1_i1	156	1	3.23559e-59	-0.441053	Downregulated	SA-C vs SA
TRINITY_DN1467_c0_g2_i1	4598	2	3.48786e-208	-0.67155	Downregulated	SA-C vs SA
TRINITY_DN147_c0_g2_i2	96	35	4.72071e-42	-0.0948526	Downregulated	SA-C vs SA
TRINITY_DN147_c0_g3_i1	55	1	2.93906e-24	-0.351735	Downregulated	SA-C vs SA
TRINITY_DN1479_c0_g1_i1	14	1170	1.76146e-11	0.370765	Upregulated	SA-C vs SA
TRINITY_DN149_c1_g3_i2	24	31.53	6.06227e-10	0.0149729	Upregulated	SA-C vs SA
TRINITY_DN1496_c0_g1_i1	47	12339	3.75836e-53	0.468835	Upregulated	SA-C vs SA
TRINITY_DN1497_c0_g1_i3	444	1	6.77868e-106	-0.530666	Downregulated	SA-C vs SA
TRINITY_DN1497_c1_g1_i4	279.81	1	2.43673e-85	-0.491109	Downregulated	SA-C vs SA
TRINITY_DN150_c0_g2_i6	1	523.65	8.11889e-12	0.527989	Upregulated	SA-C vs SA
TRINITY_DN150_c1_g1_i1	9	5265	1.65152e-50	0.537481	Upregulated	SA-C vs SA
TRINITY_DN15005_c0_g1_i1	15	438	0.0185918	0.280675	Upregulated	SA-C vs SA
TRINITY_DN1501_c0_g5_i1	28	6028	9.69198e-40	0.451836	Upregulated	SA-C vs SA
TRINITY_DN1501_c0_g6_i1	1	20094	1.89231e-110	0.840476	Upregulated	SA-C vs SA
TRINITY_DN1501_c1_g1_i1	1	447	4.73304e-10	0.51443	Upregulated	SA-C vs SA
TRINITY_DN15036_c0_g1_i2	14	17	2.1476e-06	0.00822775	Upregulated	SA-C vs SA
TRINITY_DN1513_c0_g1_i1	43	29683	2.52287e-88	0.551662	Upregulated	SA-C vs SA
TRINITY_DN152_c0_g1_i1	67046	7	0	-0.793808	Downregulated	SA-C vs SA
TRINITY_DN1535_c0_g2_i1	11	8877	8.12969e-66	0.565044	Upregulated	SA-C vs SA
TRINITY_DN1550_c0_g1_i5	37	12	3.67317e-18	-0.104878	Downregulated	SA-C vs SA
TRINITY_DN1559_c0_g2_i1	1157	1	4.85645e-148	-0.612722	Downregulated	SA-C vs SA
TRINITY_DN1559_c0_g3_i1	1540	1	1.53409e-160	-0.637221	Downregulated	SA-C vs SA
TRINITY_DN156_c0_g3_i1	20.11	84188.4	9.77757e-148	0.706088	Upregulated	SA-C vs SA
TRINITY_DN156_c0_g3_i2	12.89	10116.9	1.6531e-68	0.562661	Upregulated	SA-C vs SA
TRINITY_DN156_c0_g3_i3	38	5337.73	4.86755e-31	0.415254	Upregulated	SA-C vs SA
TRINITY_DN156_c0_g5_i1	3	57348.4	5.65466e-150	0.836202	Upregulated	SA-C vs SA
TRINITY_DN15628_c0_g1_i2	21	1	2.45934e-10	-0.269246	Downregulated	SA-C vs SA
TRINITY_DN157_c0_g2_i3	3378.35	5	8.99409e-195	-0.566639	Downregulated	SA-C vs SA
TRINITY_DN157_c1_g1_i2	993.89	1	2.15955e-141	-0.599703	Downregulated	SA-C vs SA
TRINITY_DN1577_c0_g1_i1	28	5	1.49345e-13	-0.156005	Downregulated	SA-C vs SA
TRINITY_DN1590_c0_g2_i1	733	14	4.38615e-128	-0.347516	Downregulated	SA-C vs SA
TRINITY_DN1591_c0_g1_i1	1311	10	1.58606e-153	-0.426154	Downregulated	SA-C vs SA
TRINITY_DN1591_c0_g1_i2	47	2	3.16535e-21	-0.278882	Downregulated	SA-C vs SA
TRINITY_DN1593_c0_g4_i1	1	19765	8.93113e-110	0.839062	Upregulated	SA-C vs SA
TRINITY_DN1593_c0_g6_i1	64	9145	1.46919e-36	0.416719	Upregulated	SA-C vs SA
TRINITY_DN1593_c1_g1_i2	1	1817	1.17586e-32	0.634579	Upregulated	SA-C vs SA
TRINITY_DN1594_c0_g3_i1	2	2750	6.59458e-41	0.610699	Upregulated	SA-C vs SA
TRINITY_DN161_c0_g1_i1	151540	40	0	-0.714345	Downregulated	SA-C vs SA
TRINITY_DN16156_c0_g1_i1	538	1	2.09403e-114	-0.547119	Downregulated	SA-C vs SA
TRINITY_DN16206_c0_g1_i1	25	198	0.0383951	0.168888	Upregulated	SA-C vs SA
TRINITY_DN163_c0_g1_i3	27	67.67	1.65417e-07	0.0703121	Upregulated	SA-C vs SA
TRINITY_DN1630_c0_g2_i1	67	63634	7.25921e-108	0.578999	Upregulated	SA-C vs SA
TRINITY_DN1646_c0_g1_i4	218923	246	0	-0.590238	Downregulated	SA-C vs SA
TRINITY_DN1646_c1_g1_i2	4176	4	5.35252e-204	-0.603917	Downregulated	SA-C vs SA
TRINITY_DN1650_c0_g1_i1	156	140432	3.92764e-114	0.574408	Upregulated	SA-C vs SA
TRINITY_DN1650_c0_g2_i1	8	2748	9.01912e-33	0.491866	Upregulated	SA-C vs SA
TRINITY_DN1653_c0_g2_i2	19.84	15.71	5.03731e-10	-0.0284033	Downregulated	SA-C vs SA
TRINITY_DN1663_c0_g1_i1	24	48	4.26378e-08	0.0509788	Upregulated	SA-C vs SA
TRINITY_DN170_c1_g1_i1	81359.9	34	0	-0.674982	Downregulated	SA-C vs SA
TRINITY_DN172_c0_g1_i7	329.33	3	1.39021e-92	-0.410946	Downregulated	SA-C vs SA
TRINITY_DN172_c0_g1_i9	185.49	1	1.00941e-66	-0.455887	Downregulated	SA-C vs SA
TRINITY_DN1721_c0_g2_i1	2091	1	7.07141e-174	-0.663426	Downregulated	SA-C vs SA
TRINITY_DN17219_c0_g1_i1	13	5651	1.25487e-48	0.512038	Upregulated	SA-C vs SA
TRINITY_DN173_c0_g2_i1	4	42633	4.39066e-136	0.786151	Upregulated	SA-C vs SA
TRINITY_DN1746_c0_g1_i1	64	17912	4.1253e-59	0.474316	Upregulated	SA-C vs SA
TRINITY_DN1760_c0_g1_i3	1661.87	1	7.2288e-164	-0.643746	Downregulated	SA-C vs SA
TRINITY_DN17610_c0_g1_i3	353.85	1	8.49736e-96	-0.511222	Downregulated	SA-C vs SA
TRINITY_DN1792_c0_g1_i1	88	24136	9.97888e-62	0.472583	Upregulated	SA-C vs SA
TRINITY_DN1796_c0_g1_i2	41.63	1	5.99836e-19	-0.327873	Downregulated	SA-C vs SA
TRINITY_DN1799_c1_g1_i4	244.27	1	3.95832e-79	-0.479471	Downregulated	SA-C vs SA
TRINITY_DN1799_c2_g2_i1	2548	1	1.71489e-182	-0.680361	Downregulated	SA-C vs SA
TRINITY_DN180_c0_g1_i1	7977	5	3.85484e-232	-0.640249	Downregulated	SA-C vs SA
TRINITY_DN1801_c0_g1_i1	16278	1	3.91031e-263	-0.839245	Downregulated	SA-C vs SA
TRINITY_DN1837_c0_g2_i1	2756.54	15.9	6.10065e-186	-0.450096	Downregulated	SA-C vs SA
TRINITY_DN1837_c0_g2_i2	1779.76	2.1	7.44082e-167	-0.586053	Downregulated	SA-C vs SA
TRINITY_DN1867_c0_g2_i1	6925.34	1	5.42565e-226	-0.766025	Downregulated	SA-C vs SA
TRINITY_DN187_c1_g2_i1	119	1	6.67413e-48	-0.417858	Downregulated	SA-C vs SA
TRINITY_DN19_c9_g1_i1	2268	3	2.03441e-177	-0.576264	Downregulated	SA-C vs SA
TRINITY_DN191_c0_g2_i1	26393	13	3.94185e-284	-0.660899	Downregulated	SA-C vs SA
TRINITY_DN1917_c0_g1_i1	1	1346	3.185e-26	0.608872	Upregulated	SA-C vs SA
TRINITY_DN192_c0_g1_i19	573.05	1	3.43315e-117	-0.552526	Downregulated	SA-C vs SA
TRINITY_DN1922_c0_g2_i1	2469.87	6	3.83958e-181	-0.524184	Downregulated	SA-C vs SA
TRINITY_DN1922_c0_g4_i1	3333	3	3.47933e-194	-0.609246	Downregulated	SA-C vs SA
TRINITY_DN193_c0_g1_i3	76.43	1	3.00607e-32	-0.379925	Downregulated	SA-C vs SA
TRINITY_DN193_c0_g1_i4	304.78	1	3.76331e-89	-0.498432	Downregulated	SA-C vs SA
TRINITY_DN194_c1_g1_i1	25	5625	2.00804e-39	0.455618	Upregulated	SA-C vs SA
TRINITY_DN194_c1_g2_i5	17	2295.61	1.53827e-21	0.411875	Upregulated	SA-C vs SA
TRINITY_DN1944_c0_g1_i1	5	2241	3.5623e-31	0.51466	Upregulated	SA-C vs SA
TRINITY_DN1948_c0_g1_i3	14.47	5.2	1.26331e-07	-0.0960879	Downregulated	SA-C vs SA
TRINITY_DN195_c0_g1_i2	480	2	2.33902e-109	-0.47796	Downregulated	SA-C vs SA
TRINITY_DN1954_c0_g8_i1	10	1335	7.84773e-16	0.410895	Upregulated	SA-C vs SA
TRINITY_DN1988_c0_g1_i1	1918	1	4.07206e-170	-0.656027	Downregulated	SA-C vs SA
TRINITY_DN1990_c0_g1_i2	2517.01	1	5.89028e-182	-0.679312	Downregulated	SA-C vs SA
TRINITY_DN1990_c0_g1_i7	2.87978e+06	6128	0	-0.53553	Downregulated	SA-C vs SA
TRINITY_DN1996_c0_g1_i3	22.44	31.48	5.82975e-09	0.020595	Upregulated	SA-C vs SA
TRINITY_DN1996_c0_g1_i5	28.56	0.52	8.98453e-14	-0.351615	Downregulated	SA-C vs SA
TRINITY_DN1996_c1_g1_i2	53	28	8.82606e-26	-0.0630747	Downregulated	SA-C vs SA
TRINITY_DN2_c0_g1_i1	6185.57	2	4.38691e-221	-0.696961	Downregulated	SA-C vs SA
TRINITY_DN2_c0_g5_i1	41615.4	4	6.55047e-304	-0.800894	Downregulated	SA-C vs SA
TRINITY_DN20118_c0_g3_i2	1	10676	1.34113e-86	0.786293	Upregulated	SA-C vs SA
TRINITY_DN2020_c0_g1_i3	17	2	1.24618e-08	-0.191757	Downregulated	SA-C vs SA
TRINITY_DN2027_c0_g1_i2	16.51	18	9.70402e-08	-0.00100377	Downregulated	SA-C vs SA
TRINITY_DN20307_c0_g2_i1	34	15132	2.07364e-67	0.514057	Upregulated	SA-C vs SA
TRINITY_DN2042_c0_g1_i3	1316.65	4	1.0207e-153	-0.505026	Downregulated	SA-C vs SA
TRINITY_DN2045_c0_g2_i1	2595	1	2.75669e-183	-0.681927	Downregulated	SA-C vs SA
TRINITY_DN205_c0_g1_i1	1	266	2.69963e-06	0.469959	Upregulated	SA-C vs SA
TRINITY_DN205_c0_g3_i1	21	1179.96	1.69018e-08	0.336753	Upregulated	SA-C vs SA
TRINITY_DN2069_c0_g1_i2	3455.8	1	9.19318e-196	-0.70647	Downregulated	SA-C vs SA
TRINITY_DN20825_c0_g5_i1	24	3369	4.75022e-26	0.415198	Upregulated	SA-C vs SA
TRINITY_DN212_c1_g2_i4	15.17	1	1.26331e-07	-0.241384	Downregulated	SA-C vs SA
TRINITY_DN21214_c1_g1_i1	2	1651	1.18555e-28	0.566986	Upregulated	SA-C vs SA
TRINITY_DN2125_c0_g3_i1	17	15676	3.60903e-81	0.576468	Upregulated	SA-C vs SA
TRINITY_DN21296_c0_g5_i1	16	1409	4.72505e-13	0.37525	Upregulated	SA-C vs SA
TRINITY_DN2132_c0_g6_i1	1192	3	2.34806e-149	-0.521152	Downregulated	SA-C vs SA
TRINITY_DN2132_c0_g7_i1	2748	1	8.76503e-186	-0.686835	Downregulated	SA-C vs SA
TRINITY_DN2148_c0_g1_i1	1	15635	1.2363e-100	0.818979	Upregulated	SA-C vs SA
TRINITY_DN215_c0_g1_i3	29	5472	2.86577e-36	0.440539	Upregulated	SA-C vs SA
TRINITY_DN2150_c1_g3_i1	14388	5	8.99981e-258	-0.690783	Downregulated	SA-C vs SA
TRINITY_DN2153_c0_g2_i1	451	1	1.35426e-106	-0.532006	Downregulated	SA-C vs SA
TRINITY_DN217_c0_g2_i1	23	3579	3.98318e-28	0.424025	Upregulated	SA-C vs SA
TRINITY_DN2173_c0_g1_i3	1167.51	2.64	1.83203e-148	-0.530326	Downregulated	SA-C vs SA
TRINITY_DN2173_c0_g1_i6	3324.49	29.36	4.30441e-194	-0.413601	Downregulated	SA-C vs SA
TRINITY_DN21820_c1_g1_i1	16	1	3.94049e-08	-0.245948	Downregulated	SA-C vs SA
TRINITY_DN2186_c0_g1_i1	185	1	1.00941e-66	-0.45566	Downregulated	SA-C vs SA
TRINITY_DN219_c0_g3_i1	7	4170	1.2282e-45	0.539036	Upregulated	SA-C vs SA
TRINITY_DN22_c0_g1_i3	10	7774.43	1.78792e-62	0.561847	Upregulated	SA-C vs SA
TRINITY_DN2202_c0_g1_i4	825.38	1	3.20867e-133	-0.583786	Downregulated	SA-C vs SA
TRINITY_DN222_c0_g1_i5	16	1	3.94049e-08	-0.245948	Downregulated	SA-C vs SA
TRINITY_DN224_c0_g1_i3	50.77	1	1.11358e-22	-0.344878	Downregulated	SA-C vs SA
TRINITY_DN2256_c0_g1_i1	732.27	2	5.64787e-128	-0.514146	Downregulated	SA-C vs SA
TRINITY_DN226_c0_g2_i5	110.68	2	3.95577e-45	-0.352263	Downregulated	SA-C vs SA
TRINITY_DN2270_c0_g1_i1	13104	10	1.03441e-253	-0.623389	Downregulated	SA-C vs SA
TRINITY_DN229_c0_g2_i5	68	4	1.92318e-29	-0.251142	Downregulated	SA-C vs SA
TRINITY_DN2298_c3_g2_i1	2	3713	1.70775e-49	0.636422	Upregulated	SA-C vs SA
TRINITY_DN23_c0_g1_i1	1	692.7	1.78501e-15	0.551959	Upregulated	SA-C vs SA
TRINITY_DN230_c0_g4_i4	18253.5	2	4.11639e-268	-0.789674	Downregulated	SA-C vs SA
TRINITY_DN2301_c0_g1_i1	26	8742	7.14654e-53	0.490033	Upregulated	SA-C vs SA
TRINITY_DN232_c0_g5_i1	1.13	7252.79	6.49408e-73	0.742699	Upregulated	SA-C vs SA
TRINITY_DN232_c0_g5_i2	24.87	11209.2	2.52696e-62	0.515139	Upregulated	SA-C vs SA
TRINITY_DN2344_c0_g3_i1	1635	2	3.79967e-163	-0.582964	Downregulated	SA-C vs SA
TRINITY_DN2348_c0_g1_i2	36.53	10	9.20566e-18	-0.119403	Downregulated	SA-C vs SA
TRINITY_DN238_c0_g2_i2	19	4434.82	1.44512e-36	0.458762	Upregulated	SA-C vs SA
TRINITY_DN2383_c1_g1_i2	2010.54	1	3.52257e-172	-0.660064	Downregulated	SA-C vs SA
TRINITY_DN23890_c0_g1_i1	1	414	2.42167e-09	0.507859	Upregulated	SA-C vs SA
TRINITY_DN240_c0_g2_i10	1237.59	0.85	5.27884e-151	-0.632415	Downregulated	SA-C vs SA
TRINITY_DN240_c0_g2_i5	3941.54	1.15	1.73098e-201	-0.705763	Downregulated	SA-C vs SA
TRINITY_DN241_c0_g1_i5	381.94	2	3.22554e-99	-0.458381	Downregulated	SA-C vs SA
TRINITY_DN24168_c0_g6_i1	46	39101	9.05992e-98	0.569494	Upregulated	SA-C vs SA
TRINITY_DN24351_c0_g1_i1	17	7	3.99443e-09	-0.0844262	Downregulated	SA-C vs SA
TRINITY_DN244_c0_g1_i1	10.64	2.84	4.53786e-06	-0.121567	Downregulated	SA-C vs SA
TRINITY_DN245_c1_g1_i1	41	1361.57	7.11907e-05	0.291698	Upregulated	SA-C vs SA
TRINITY_DN246_c1_g1_i3	24	2	1.63617e-11	-0.221301	Downregulated	SA-C vs SA
TRINITY_DN2473_c0_g2_i4	157.33	1	1.60202e-59	-0.44178	Downregulated	SA-C vs SA
TRINITY_DN2479_c0_g1_i1	111	73	6.59283e-43	-0.0443104	Downregulated	SA-C vs SA
TRINITY_DN2485_c0_g1_i3	12128	2.06	2.39653e-250	-0.752114	Downregulated	SA-C vs SA
TRINITY_DN2485_c0_g1_i8	655.62	0.61	3.81149e-123	-0.606407	Downregulated	SA-C vs SA
TRINITY_DN2485_c0_g1_i9	6611.81	1.33	5.57672e-224	-0.737623	Downregulated	SA-C vs SA
TRINITY_DN25_c0_g1_i10	12	2403.34	5.62344e-26	0.445646	Upregulated	SA-C vs SA
TRINITY_DN25_c0_g1_i11	13.96	3026.59	4.89549e-30	0.452439	Upregulated	SA-C vs SA
TRINITY_DN25_c0_g1_i6	3.04	8203.89	1.37048e-73	0.668469	Upregulated	SA-C vs SA
TRINITY_DN25_c0_g2_i1	2	6353.24	1.57506e-66	0.68244	Upregulated	SA-C vs SA
TRINITY_DN25381_c0_g1_i1	7	4176.19	1.14705e-45	0.539163	Upregulated	SA-C vs SA
TRINITY_DN25381_c0_g3_i2	8	1739.01	2.40035e-22	0.452664	Upregulated	SA-C vs SA
TRINITY_DN2542_c1_g1_i4	1920.6	1	3.50267e-170	-0.656143	Downregulated	SA-C vs SA
TRINITY_DN2546_c0_g1_i1	7551.53	32.8	9.02088e-230	-0.474399	Downregulated	SA-C vs SA
TRINITY_DN2546_c0_g1_i12	12211	2.2	1.21109e-250	-0.747065	Downregulated	SA-C vs SA
TRINITY_DN255_c0_g1_i3	31	147	8.64523e-05	0.124942	Upregulated	SA-C vs SA
TRINITY_DN255_c0_g1_i4	2289	1	7.99606e-178	-0.671177	Downregulated	SA-C vs SA
TRINITY_DN256_c0_g5_i1	17	15057	1.3305e-79	0.573017	Upregulated	SA-C vs SA
TRINITY_DN259_c0_g2_i1	5154	2	3.78898e-213	-0.68133	Downregulated	SA-C vs SA
TRINITY_DN26_c0_g1_i1	21	13612	2.10808e-72	0.546269	Upregulated	SA-C vs SA
TRINITY_DN26_c0_g2_i11	10	3125.82	3.71895e-34	0.483785	Upregulated	SA-C vs SA
TRINITY_DN26_c0_g2_i7	67.98	79972.4	5.02793e-117	0.597335	Upregulated	SA-C vs SA
TRINITY_DN26_c0_g2_i8	1.02	1490.55	1.83935e-28	0.615915	Upregulated	SA-C vs SA
TRINITY_DN260_c0_g1_i1	19346.4	8	1.22798e-270	-0.675885	Downregulated	SA-C vs SA
TRINITY_DN26074_c0_g1_i1	20	12786	5.16319e-71	0.545086	Upregulated	SA-C vs SA
TRINITY_DN2608_c0_g1_i2	610	1	5.84744e-120	-0.557879	Downregulated	SA-C vs SA
TRINITY_DN261_c0_g3_i1	6919.71	6	5.83036e-226	-0.612447	Downregulated	SA-C vs SA
TRINITY_DN2610_c0_g1_i1	834.72	3.52	9.26535e-134	-0.476932	Downregulated	SA-C vs SA
TRINITY_DN2610_c0_g1_i2	99.28	1.48	6.73333e-41	-0.368747	Downregulated	SA-C vs SA
TRINITY_DN26102_c0_g1_i1	23	5745	2.13359e-41	0.46457	Upregulated	SA-C vs SA
TRINITY_DN26136_c0_g1_i1	17	4281	5.68408e-37	0.465267	Upregulated	SA-C vs SA
TRINITY_DN2617_c0_g3_i1	5	721	7.00496e-11	0.417501	Upregulated	SA-C vs SA
TRINITY_DN26179_c0_g1_i1	184	2	1.57663e-66	-0.395811	Downregulated	SA-C vs SA
TRINITY_DN262_c0_g11_i1	1	1672	9.83925e-31	0.627454	Upregulated	SA-C vs SA
TRINITY_DN262_c0_g2_i3	1	3189.12	5.21705e-47	0.682776	Upregulated	SA-C vs SA
TRINITY_DN262_c0_g5_i1	1	7857	1.55134e-75	0.760026	Upregulated	SA-C vs SA
TRINITY_DN262_c0_g7_i1	1	28751	1.66527e-124	0.871169	Upregulated	SA-C vs SA
TRINITY_DN26221_c0_g1_i1	10	1997	1.62563e-23	0.445398	Upregulated	SA-C vs SA
TRINITY_DN26236_c0_g1_i1	1	213	6.4413e-05	0.450922	Upregulated	SA-C vs SA
TRINITY_DN26241_c0_g1_i1	57	15117	7.40978e-56	0.469705	Upregulated	SA-C vs SA
TRINITY_DN26284_c0_g1_i1	1	3964	1.69759e-53	0.701411	Upregulated	SA-C vs SA
TRINITY_DN26343_c0_g1_i1	25	1826	3.6952e-13	0.359225	Upregulated	SA-C vs SA
TRINITY_DN26370_c0_g1_i4	11	353.12	0.018725	0.288792	Upregulated	SA-C vs SA
TRINITY_DN2638_c0_g1_i1	23	5598	1.40087e-40	0.462349	Upregulated	SA-C vs SA
TRINITY_DN26456_c0_g1_i1	1	5337	9.10808e-63	0.726892	Upregulated	SA-C vs SA
TRINITY_DN26557_c0_g1_i1	18	1	7.04361e-09	-0.256039	Downregulated	SA-C vs SA
TRINITY_DN26605_c0_g1_i1	1	7519	7.14399e-74	0.756259	Upregulated	SA-C vs SA
TRINITY_DN2666_c0_g1_i2	4493.16	11	3.48608e-207	-0.52352	Downregulated	SA-C vs SA
TRINITY_DN26683_c0_g1_i1	4	4582	1.37621e-52	0.595053	Upregulated	SA-C vs SA
TRINITY_DN26739_c0_g1_i1	10	6929	2.59965e-58	0.551984	Upregulated	SA-C vs SA
TRINITY_DN2674_c1_g2_i1	751.65	1	3.75284e-129	-0.575769	Downregulated	SA-C vs SA
TRINITY_DN2682_c0_g1_i2	13	1.32	7.44748e-07	-0.204372	Downregulated	SA-C vs SA
TRINITY_DN2694_c0_g1_i1	456.69	1	3.5046e-107	-0.53308	Downregulated	SA-C vs SA
TRINITY_DN26969_c0_g1_i1	774	2464	4.21269e-23	0.0908024	Upregulated	SA-C vs SA
TRINITY_DN270_c0_g1_i2	1350	3	8.48276e-155	-0.531816	Downregulated	SA-C vs SA
TRINITY_DN272_c0_g1_i2	15088.6	3	7.72743e-260	-0.738622	Downregulated	SA-C vs SA
TRINITY_DN274_c0_g2_i1	8462	2	1.05224e-234	-0.723809	Downregulated	SA-C vs SA
TRINITY_DN275_c0_g1_i6	1448.41	1	7.5748e-158	-0.631968	Downregulated	SA-C vs SA
TRINITY_DN2758_c0_g2_i1	1067	2	1.70126e-144	-0.546399	Downregulated	SA-C vs SA
TRINITY_DN276_c0_g1_i3	443.15	1.9	8.62445e-106	-0.475511	Downregulated	SA-C vs SA
TRINITY_DN276_c0_g1_i6	388.37	9.2	5.67247e-100	-0.329067	Downregulated	SA-C vs SA
TRINITY_DN276_c0_g1_i7	3344.51	1.9	2.42379e-194	-0.648675	Downregulated	SA-C vs SA
TRINITY_DN277_c0_g1_i3	2357.67	2	4.08854e-179	-0.614324	Downregulated	SA-C vs SA
TRINITY_DN2777_c0_g1_i3	655.01	1	4.48089e-123	-0.563979	Downregulated	SA-C vs SA
TRINITY_DN2778_c0_g1_i2	15	11.8	1.75007e-07	-0.0289643	Downregulated	SA-C vs SA
TRINITY_DN278_c1_g1_i6	16.96	1.24	2.21221e-08	-0.23251	Downregulated	SA-C vs SA
TRINITY_DN28_c0_g1_i1	86	5883.29	6.96239e-19	0.353615	Upregulated	SA-C vs SA
TRINITY_DN280_c0_g2_i2	248.89	2	4.36954e-80	-0.421691	Downregulated	SA-C vs SA
TRINITY_DN281_c1_g1_i2	2565.1	2	8.79603e-183	-0.621549	Downregulated	SA-C vs SA
TRINITY_DN28812_c0_g1_i1	14	4	1.26331e-07	-0.115737	Downregulated	SA-C vs SA
TRINITY_DN289_c0_g1_i1	24	13544.7	6.2738e-70	0.534404	Upregulated	SA-C vs SA
TRINITY_DN29_c0_g2_i1	1	12701	1.09457e-92	0.801174	Upregulated	SA-C vs SA
TRINITY_DN292_c0_g1_i16	4185	2	4.32428e-204	-0.663487	Downregulated	SA-C vs SA
TRINITY_DN292_c0_g1_i23	5289.99	1	2.78291e-214	-0.742947	Downregulated	SA-C vs SA
TRINITY_DN292_c0_g1_i4	29565	5	4.63605e-289	-0.752486	Downregulated	SA-C vs SA
TRINITY_DN298_c0_g1_i1	1525.29	4.46	4.08169e-160	-0.508302	Downregulated	SA-C vs SA
TRINITY_DN298_c0_g1_i2	12043.7	21.54	4.75424e-250	-0.55042	Downregulated	SA-C vs SA
TRINITY_DN298_c0_g1_i5	329.8	1	1.18077e-92	-0.505192	Downregulated	SA-C vs SA
TRINITY_DN299_c0_g1_i4	71.23	1	1.69358e-30	-0.373889	Downregulated	SA-C vs SA
TRINITY_DN300_c0_g2_i1	1240	1	4.54879e-151	-0.618658	Downregulated	SA-C vs SA
TRINITY_DN3000_c0_g1_i1	20	17024	7.44777e-82	0.569612	Upregulated	SA-C vs SA
TRINITY_DN303_c0_g1_i7	1672.06	1	3.96913e-164	-0.64427	Downregulated	SA-C vs SA
TRINITY_DN306_c0_g1_i2	17523	2447	1.88888e-142	-0.17707	Downregulated	SA-C vs SA
TRINITY_DN3068_c0_g1_i2	272.44	1	5.08847e-84	-0.488822	Downregulated	SA-C vs SA
TRINITY_DN30925_c0_g1_i1	1	110	0.0155637	0.394307	Upregulated	SA-C vs SA
TRINITY_DN30926_c0_g1_i1	24	3735	9.94105e-29	0.424034	Upregulated	SA-C vs SA
TRINITY_DN30941_c0_g1_i1	39	9963	1.05913e-49	0.466496	Upregulated	SA-C vs SA
TRINITY_DN30952_c0_g1_i1	3	15136	4.16925e-96	0.722077	Upregulated	SA-C vs SA
TRINITY_DN3096_c0_g2_i2	403.35	1	1.37387e-101	-0.52244	Downregulated	SA-C vs SA
TRINITY_DN30971_c0_g1_i1	7	1424	1.7205e-19	0.446983	Upregulated	SA-C vs SA
TRINITY_DN30981_c0_g1_i1	1	10693	1.17943e-86	0.78643	Upregulated	SA-C vs SA
TRINITY_DN310_c0_g1_i1	8887	2	7.80191e-237	-0.728008	Downregulated	SA-C vs SA
TRINITY_DN31002_c0_g1_i1	46	6407	9.7371e-33	0.414528	Upregulated	SA-C vs SA
TRINITY_DN31017_c0_g1_i2	26719.1	10	1.15565e-284	-0.684429	Downregulated	SA-C vs SA
TRINITY_DN31030_c0_g1_i1	20	31976	5.63082e-107	0.623618	Upregulated	SA-C vs SA
TRINITY_DN31049_c0_g1_i1	4	699	1.32398e-11	0.433964	Upregulated	SA-C vs SA
TRINITY_DN31063_c0_g1_i1	1	1855	3.18705e-33	0.636352	Upregulated	SA-C vs SA
TRINITY_DN311_c0_g1_i1	4615.13	20	2.34158e-208	-0.474595	Downregulated	SA-C vs SA
TRINITY_DN31133_c0_g1_i1	2	447	6.4963e-09	0.455045	Upregulated	SA-C vs SA
TRINITY_DN31185_c0_g1_i2	63	1	2.06637e-27	-0.363369	Downregulated	SA-C vs SA
TRINITY_DN31219_c0_g1_i1	7	5331	4.54829e-53	0.56008	Upregulated	SA-C vs SA
TRINITY_DN31223_c0_g1_i1	19	17080	8.27568e-83	0.574288	Upregulated	SA-C vs SA
TRINITY_DN313_c0_g1_i1	21	1341	4.29881e-10	0.347714	Upregulated	SA-C vs SA
TRINITY_DN31323_c0_g1_i1	28	826	0.00303764	0.281551	Upregulated	SA-C vs SA
TRINITY_DN31352_c0_g1_i1	13	1307	1.20977e-13	0.386601	Upregulated	SA-C vs SA
TRINITY_DN316_c0_g2_i1	7	13732	7.5914e-87	0.641145	Upregulated	SA-C vs SA
TRINITY_DN31653_c0_g1_i2	14	76	0.0181302	0.136528	Upregulated	SA-C vs SA
TRINITY_DN3182_c0_g1_i1	2	17496	2.43303e-103	0.769229	Upregulated	SA-C vs SA
TRINITY_DN32_c0_g3_i2	1	2119.98	2.90646e-36	0.647792	Upregulated	SA-C vs SA
TRINITY_DN32_c0_g5_i1	1	6968	2.05336e-71	0.749738	Upregulated	SA-C vs SA
TRINITY_DN32_c1_g1_i1	1	2414	8.68489e-40	0.658919	Upregulated	SA-C vs SA
TRINITY_DN3220_c0_g2_i2	23082.6	12	2.61053e-278	-0.656274	Downregulated	SA-C vs SA
TRINITY_DN3222_c0_g1_i1	1152	1	7.49411e-148	-0.612351	Downregulated	SA-C vs SA
TRINITY_DN323_c0_g2_i1	626	3	4.26317e-121	-0.465974	Downregulated	SA-C vs SA
TRINITY_DN323_c0_g4_i1	1381.46	1	8.88901e-156	-0.627913	Downregulated	SA-C vs SA
TRINITY_DN3238_c0_g1_i2	17	2.25	1.24618e-08	-0.181666	Downregulated	SA-C vs SA
TRINITY_DN32688_c0_g1_i1	20	15	2.79657e-11	-0.0330537	Downregulated	SA-C vs SA
TRINITY_DN328_c0_g3_i1	132.57	1	1.97375e-52	-0.42711	Downregulated	SA-C vs SA
TRINITY_DN33_c1_g1_i1	7	2318	1.00062e-29	0.488727	Upregulated	SA-C vs SA
TRINITY_DN331_c0_g5_i1	1	5763	3.50624e-65	0.733471	Upregulated	SA-C vs SA
TRINITY_DN332_c0_g3_i4	13	8	1.26331e-07	-0.0500024	Downregulated	SA-C vs SA
TRINITY_DN33240_c0_g1_i1	14	1	4.1078e-07	-0.234508	Downregulated	SA-C vs SA
TRINITY_DN3333_c0_g2_i1	1179	4	7.13407e-149	-0.495565	Downregulated	SA-C vs SA
TRINITY_DN3364_c0_g2_i2	2	23013	7.93398e-114	0.792712	Upregulated	SA-C vs SA
TRINITY_DN3401_c0_g1_i7	1961.81	2	4.18138e-171	-0.598576	Downregulated	SA-C vs SA
TRINITY_DN3416_c0_g1_i3	1345.72	1	1.18234e-154	-0.625668	Downregulated	SA-C vs SA
TRINITY_DN3421_c0_g2_i4	7065.99	35.83	6.98959e-227	-0.461136	Downregulated	SA-C vs SA
TRINITY_DN3431_c0_g1_i1	1698	2	8.46454e-165	-0.586204	Downregulated	SA-C vs SA
TRINITY_DN344_c0_g1_i3	23	19	1.41877e-11	-0.0247752	Downregulated	SA-C vs SA
TRINITY_DN3441_c0_g1_i2	65874.8	9	0	-0.770767	Downregulated	SA-C vs SA
TRINITY_DN35_c0_g1_i2	14	25.61	1.5793e-05	0.0433347	Upregulated	SA-C vs SA
TRINITY_DN350_c0_g1_i1	1186	1	3.9967e-149	-0.614843	Downregulated	SA-C vs SA
TRINITY_DN351_c0_g5_i1	1	2723	9.60174e-43	0.669239	Upregulated	SA-C vs SA
TRINITY_DN3533_c0_g2_i2	1	26679	2.14578e-121	0.864761	Upregulated	SA-C vs SA
TRINITY_DN3533_c1_g1_i1	21	60838	6.58132e-133	0.674547	Upregulated	SA-C vs SA
TRINITY_DN3533_c1_g2_i1	19	7119	4.02261e-51	0.49931	Upregulated	SA-C vs SA
TRINITY_DN3533_c1_g3_i1	6	6221	1.22481e-59	0.586514	Upregulated	SA-C vs SA
TRINITY_DN35673_c0_g1_i1	36	16880	2.46964e-70	0.518526	Upregulated	SA-C vs SA
TRINITY_DN35680_c0_g1_i1	21	7929	3.79696e-53	0.499968	Upregulated	SA-C vs SA
TRINITY_DN35705_c0_g1_i1	43	19422	1.05058e-71	0.515321	Upregulated	SA-C vs SA
TRINITY_DN35711_c0_g1_i1	37	20827	1.12153e-77	0.534181	Upregulated	SA-C vs SA
TRINITY_DN35722_c0_g1_i1	1	325	2.04358e-07	0.487122	Upregulated	SA-C vs SA
TRINITY_DN35798_c0_g1_i1	21	4169	1.71204e-33	0.444892	Upregulated	SA-C vs SA
TRINITY_DN35867_c0_g1_i1	2088	2	8.1205e-174	-0.603917	Downregulated	SA-C vs SA
TRINITY_DN3588_c0_g1_i1	89	1	3.07994e-37	-0.39297	Downregulated	SA-C vs SA
TRINITY_DN35888_c0_g1_i1	18	8658	1.30379e-58	0.520711	Upregulated	SA-C vs SA
TRINITY_DN35892_c0_g1_i1	1	2572	2.37247e-41	0.664351	Upregulated	SA-C vs SA
TRINITY_DN35896_c0_g1_i1	3	7020	4.12097e-68	0.656252	Upregulated	SA-C vs SA
TRINITY_DN359_c0_g3_i1	29	4737	3.36876e-32	0.428181	Upregulated	SA-C vs SA
TRINITY_DN35901_c0_g1_i1	1	10120	1.63932e-84	0.781711	Upregulated	SA-C vs SA
TRINITY_DN35926_c0_g1_i1	3664	4	2.6195e-198	-0.592711	Downregulated	SA-C vs SA
TRINITY_DN35933_c0_g1_i1	23	1465	1.50836e-10	0.347497	Upregulated	SA-C vs SA
TRINITY_DN35938_c0_g1_i1	1	4501	3.96851e-57	0.712296	Upregulated	SA-C vs SA
TRINITY_DN35971_c0_g1_i1	15	1246	8.04819e-12	0.370246	Upregulated	SA-C vs SA
TRINITY_DN36_c0_g2_i1	5	9368	4.72048e-75	0.637207	Upregulated	SA-C vs SA
TRINITY_DN36_c0_g2_i3	1	7686	1.05619e-74	0.758141	Upregulated	SA-C vs SA
TRINITY_DN36_c0_g3_i1	26	1692	1.63293e-11	0.349335	Upregulated	SA-C vs SA
TRINITY_DN36_c1_g2_i1	15	1961	1.72205e-19	0.409101	Upregulated	SA-C vs SA
TRINITY_DN36_c2_g1_i1	15	11082	4.43879e-70	0.557479	Upregulated	SA-C vs SA
TRINITY_DN360_c0_g2_i1	42	17119	1.90153e-67	0.506524	Upregulated	SA-C vs SA
TRINITY_DN36059_c0_g1_i1	8	4150	3.84373e-44	0.527184	Upregulated	SA-C vs SA
TRINITY_DN36066_c0_g1_i1	2906	2	3.23824e-188	-0.632239	Downregulated	SA-C vs SA
TRINITY_DN36086_c0_g1_i1	4	8982	4.84402e-75	0.65272	Upregulated	SA-C vs SA
TRINITY_DN3614_c0_g1_i1	1	21405	1.13617e-112	0.845891	Upregulated	SA-C vs SA
TRINITY_DN364_c0_g1_i11	5374.39	4.5	5.71266e-215	-0.615441	Downregulated	SA-C vs SA
TRINITY_DN364_c0_g1_i5	1343.6	4.5	1.32969e-154	-0.496671	Downregulated	SA-C vs SA
TRINITY_DN36438_c0_g1_i1	1	1542	2.70196e-29	0.620519	Upregulated	SA-C vs SA
TRINITY_DN365_c0_g2_i1	31	6405	9.10566e-40	0.448314	Upregulated	SA-C vs SA
TRINITY_DN366_c0_g1_i26	2707.51	1	3.82153e-185	-0.685563	Downregulated	SA-C vs SA
TRINITY_DN36619_c0_g1_i2	1	93	0.0324684	0.379924	Upregulated	SA-C vs SA
TRINITY_DN36702_c0_g1_i1	12	1603	1.21673e-17	0.410949	Upregulated	SA-C vs SA
TRINITY_DN3678_c0_g2_i1	6056	1	3.67097e-220	-0.754533	Downregulated	SA-C vs SA
TRINITY_DN36845_c0_g1_i1	2007	2	4.3427e-172	-0.600528	Downregulated	SA-C vs SA
TRINITY_DN369_c1_g2_i1	31	5762	1.01218e-36	0.43925	Upregulated	SA-C vs SA
TRINITY_DN37_c0_g1_i1	71.5	7704.44	3.86307e-29	0.39254	Upregulated	SA-C vs SA
TRINITY_DN37_c0_g2_i3	14.3	31721.1	4.07567e-112	0.651674	Upregulated	SA-C vs SA
TRINITY_DN37_c0_g2_i4	44.4	16452.3	6.86047e-65	0.498359	Upregulated	SA-C vs SA
TRINITY_DN37_c0_g2_i5	4.8	8526.65	8.37016e-72	0.632642	Upregulated	SA-C vs SA
TRINITY_DN37_c0_g4_i3	1	7761	4.48271e-75	0.758973	Upregulated	SA-C vs SA
TRINITY_DN37_c0_g4_i4	11	6207.93	1.02988e-53	0.534403	Upregulated	SA-C vs SA
TRINITY_DN37_c2_g1_i1	24	12265	2.23313e-66	0.525901	Upregulated	SA-C vs SA
TRINITY_DN371_c0_g1_i1	1896.63	4	1.22618e-169	-0.536296	Downregulated	SA-C vs SA
TRINITY_DN3721_c0_g1_i2	1	285	1.22095e-06	0.47587	Upregulated	SA-C vs SA
TRINITY_DN37391_c0_g1_i2	12	1	2.47519e-06	-0.221301	Downregulated	SA-C vs SA
TRINITY_DN374_c0_g1_i2	4177.14	2	5.25262e-204	-0.663326	Downregulated	SA-C vs SA
TRINITY_DN37461_c0_g1_i1	15	3	7.04324e-08	-0.146295	Downregulated	SA-C vs SA
TRINITY_DN3776_c0_g1_i1	7	17630	1.70383e-96	0.662552	Upregulated	SA-C vs SA
TRINITY_DN378_c0_g1_i5	2	11915.3	1.06074e-88	0.736317	Upregulated	SA-C vs SA
TRINITY_DN378_c2_g1_i1	8	12687	1.35462e-82	0.622923	Upregulated	SA-C vs SA
TRINITY_DN38_c0_g1_i1	30	77604	2.50751e-136	0.664843	Upregulated	SA-C vs SA
TRINITY_DN3812_c0_g1_i1	33	25	3.93677e-16	-0.0321926	Downregulated	SA-C vs SA
TRINITY_DN383_c0_g2_i3	142.47	1	4.01423e-55	-0.43328	Downregulated	SA-C vs SA
TRINITY_DN384_c0_g2_i1	18	49785	4.13716e-127	0.670576	Upregulated	SA-C vs SA
TRINITY_DN38531_c0_g1_i1	11	7	1.3552e-06	-0.0471304	Downregulated	SA-C vs SA
TRINITY_DN3871_c0_g2_i6	1586.76	5	7.42079e-162	-0.501895	Downregulated	SA-C vs SA
TRINITY_DN3874_c0_g1_i2	858.45	1	6.12437e-135	-0.587152	Downregulated	SA-C vs SA
TRINITY_DN388_c0_g1_i4	24.2	1	1.63617e-11	-0.281397	Downregulated	SA-C vs SA
TRINITY_DN3882_c0_g2_i1	4532.7	1.5	1.44965e-207	-0.694972	Downregulated	SA-C vs SA
TRINITY_DN3882_c0_g2_i3	395.3	1.5	1.02764e-100	-0.485974	Downregulated	SA-C vs SA
TRINITY_DN389_c0_g1_i1	2657	1	2.57725e-184	-0.68395	Downregulated	SA-C vs SA
TRINITY_DN3890_c1_g1_i5	8488.48	1	7.74747e-235	-0.783462	Downregulated	SA-C vs SA
TRINITY_DN38928_c0_g1_i2	17	1	2.21221e-08	-0.251142	Downregulated	SA-C vs SA
TRINITY_DN391_c0_g3_i1	28351	20	3.06127e-287	-0.630123	Downregulated	SA-C vs SA
TRINITY_DN392_c0_g1_i1	268	1.5	2.29031e-83	-0.452676	Downregulated	SA-C vs SA
TRINITY_DN3923_c0_g1_i2	15	58	0.00157061	0.10746	Upregulated	SA-C vs SA
TRINITY_DN3974_c0_g2_i1	10	5936	2.24546e-53	0.538731	Upregulated	SA-C vs SA
TRINITY_DN399_c0_g1_i1	1506	3	1.42456e-159	-0.541185	Downregulated	SA-C vs SA
TRINITY_DN40_c0_g5_i4	17	11652.8	5.36345e-70	0.551059	Upregulated	SA-C vs SA
TRINITY_DN400_c0_g1_i1	15146	2.5	5.2962e-260	-0.754567	Downregulated	SA-C vs SA
TRINITY_DN402_c0_g1_i4	81531	15	0	-0.74527	Downregulated	SA-C vs SA
TRINITY_DN402_c3_g1_i1	1196	1	1.72397e-149	-0.615563	Downregulated	SA-C vs SA
TRINITY_DN40236_c0_g1_i1	16	1	3.94049e-08	-0.245948	Downregulated	SA-C vs SA
TRINITY_DN40579_c0_g1_i1	5	3081	2.25167e-39	0.541933	Upregulated	SA-C vs SA
TRINITY_DN40591_c0_g1_i1	29	82455	1.27566e-139	0.672942	Upregulated	SA-C vs SA
TRINITY_DN406_c0_g1_i3	66	1	2.32161e-28	-0.367355	Downregulated	SA-C vs SA
TRINITY_DN406_c3_g1_i1	18	3055	2.36041e-27	0.431463	Upregulated	SA-C vs SA
TRINITY_DN40613_c0_g1_i1	3	2323	7.49862e-35	0.561504	Upregulated	SA-C vs SA
TRINITY_DN40614_c0_g1_i1	1	14196	4.01038e-97	0.810707	Upregulated	SA-C vs SA
TRINITY_DN40701_c0_g1_i1	88	10190	9.43735e-33	0.398706	Upregulated	SA-C vs SA
TRINITY_DN40727_c0_g1_i1	1131	1	4.7542e-147	-0.610775	Downregulated	SA-C vs SA
TRINITY_DN40729_c0_g1_i1	17	4824	1.66184e-40	0.475498	Upregulated	SA-C vs SA
TRINITY_DN40759_c0_g1_i1	12	8181	4.37826e-62	0.550594	Upregulated	SA-C vs SA
TRINITY_DN40760_c0_g1_i1	16	516	0.00525155	0.289187	Upregulated	SA-C vs SA
TRINITY_DN40767_c0_g1_i1	1	12824	4.5674e-93	0.801999	Upregulated	SA-C vs SA
TRINITY_DN40774_c0_g1_i1	34	6864	2.53666e-40	0.446329	Upregulated	SA-C vs SA
TRINITY_DN40776_c0_g1_i1	8	5154	7.94601e-51	0.545747	Upregulated	SA-C vs SA
TRINITY_DN40784_c0_g1_i1	4	13324	1.10487e-89	0.686506	Upregulated	SA-C vs SA
TRINITY_DN40808_c0_g1_i1	1	5376	4.78014e-63	0.727516	Upregulated	SA-C vs SA
TRINITY_DN40848_c0_g1_i1	1914	1	5.07155e-170	-0.655848	Downregulated	SA-C vs SA
TRINITY_DN4087_c0_g1_i1	1304.06	1	2.8441e-153	-0.622973	Downregulated	SA-C vs SA
TRINITY_DN4087_c0_g2_i1	12392.7	4	2.75044e-251	-0.697111	Downregulated	SA-C vs SA
TRINITY_DN409_c0_g2_i1	395.01	1	1.02764e-100	-0.52065	Downregulated	SA-C vs SA
TRINITY_DN41_c0_g2_i5	170.07	1	5.88834e-63	-0.448451	Downregulated	SA-C vs SA
TRINITY_DN410_c0_g1_i1	17	12	1.29729e-09	-0.0382477	Downregulated	SA-C vs SA
TRINITY_DN4107_c1_g2_i1	1036	1	3.28427e-143	-0.603258	Downregulated	SA-C vs SA
TRINITY_DN41076_c0_g1_i1	24	1	1.63617e-11	-0.280686	Downregulated	SA-C vs SA
TRINITY_DN411_c0_g2_i1	9	1997.7	2.01915e-24	0.454455	Upregulated	SA-C vs SA
TRINITY_DN411_c1_g2_i1	16	24	5.49458e-07	0.0263317	Upregulated	SA-C vs SA
TRINITY_DN411_c1_g4_i1	18	66180	4.25594e-139	0.694965	Upregulated	SA-C vs SA
TRINITY_DN415_c0_g1_i1	2	15622	9.08832e-99	0.759523	Upregulated	SA-C vs SA
TRINITY_DN41979_c0_g1_i1	38	5	9.20566e-18	-0.182168	Downregulated	SA-C vs SA
TRINITY_DN420_c0_g2_i4	1094.47	1	1.37666e-145	-0.607962	Downregulated	SA-C vs SA
TRINITY_DN4202_c0_g3_i1	31	42359	4.01378e-110	0.610162	Upregulated	SA-C vs SA
TRINITY_DN42109_c0_g1_i1	1	821	1.33371e-17	0.566517	Upregulated	SA-C vs SA
TRINITY_DN4217_c0_g1_i1	3173	1	4.81485e-192	-0.699155	Downregulated	SA-C vs SA
TRINITY_DN423_c0_g1_i1	40.9	1	1.47817e-18	-0.326357	Downregulated	SA-C vs SA
TRINITY_DN42311_c0_g1_i1	5	3113	1.12794e-39	0.542818	Upregulated	SA-C vs SA
TRINITY_DN424_c0_g1_i1	2843.71	3	2.81942e-187	-0.595644	Downregulated	SA-C vs SA
TRINITY_DN4244_c0_g1_i1	456	2	4.42759e-107	-0.473566	Downregulated	SA-C vs SA
TRINITY_DN42460_c0_g1_i1	19	1	2.27269e-09	-0.260671	Downregulated	SA-C vs SA
TRINITY_DN4254_c0_g1_i1	176.22	1.04	1.52575e-64	-0.448134	Downregulated	SA-C vs SA
TRINITY_DN4254_c0_g1_i2	4600.9	0.48	3.27582e-208	-0.793873	Downregulated	SA-C vs SA
TRINITY_DN4254_c0_g1_i5	121.83	0.48	8.6751e-49	-0.482754	Downregulated	SA-C vs SA
TRINITY_DN43_c0_g1_i17	46	22350.1	1.61086e-75	0.521574	Upregulated	SA-C vs SA
TRINITY_DN43_c0_g3_i2	55	43225.5	2.54865e-97	0.562776	Upregulated	SA-C vs SA
TRINITY_DN4327_c0_g4_i1	4152	1	9.55515e-204	-0.722194	Downregulated	SA-C vs SA
TRINITY_DN433_c0_g1_i1	19	20332.6	1.04511e-89	0.589223	Upregulated	SA-C vs SA
TRINITY_DN4351_c0_g1_i1	6035	3	5.19331e-220	-0.660112	Downregulated	SA-C vs SA
TRINITY_DN439_c0_g2_i6	3993.99	2	4.67527e-202	-0.659485	Downregulated	SA-C vs SA
TRINITY_DN439_c0_g2_i7	588.02	2	2.41767e-118	-0.49535	Downregulated	SA-C vs SA
TRINITY_DN44_c0_g1_i2	0.21	17146.5	2.69728e-106	0.960594	Upregulated	SA-C vs SA
TRINITY_DN44_c0_g1_i5	43.28	4110.05	2.50582e-22	0.381714	Upregulated	SA-C vs SA
TRINITY_DN44_c0_g1_i6	5.74	23911.2	8.70257e-110	0.705664	Upregulated	SA-C vs SA
TRINITY_DN44_c0_g5_i1	1	7790	3.18818e-75	0.759292	Upregulated	SA-C vs SA
TRINITY_DN44_c1_g2_i1	5	8768	7.55116e-73	0.631536	Upregulated	SA-C vs SA
TRINITY_DN443_c0_g5_i2	15	3551.83	2.88421e-33	0.459993	Upregulated	SA-C vs SA
TRINITY_DN445_c0_g1_i1	62814	19	0	-0.702673	Downregulated	SA-C vs SA
TRINITY_DN4459_c0_g1_i1	4106	42	2.74206e-203	-0.401015	Downregulated	SA-C vs SA
TRINITY_DN4459_c0_g2_i1	1688	1	1.52746e-164	-0.645083	Downregulated	SA-C vs SA
TRINITY_DN4497_c0_g2_i3	1697.96	26	7.7137e-165	-0.36645	Downregulated	SA-C vs SA
TRINITY_DN45_c0_g1_i15	1.33	550.67	1.48701e-12	0.507867	Upregulated	SA-C vs SA
TRINITY_DN45_c0_g1_i2	4.67	9327.76	6.98781e-75	0.642688	Upregulated	SA-C vs SA
TRINITY_DN45_c0_g1_i5	6	562.89	1.31574e-07	0.380671	Upregulated	SA-C vs SA
TRINITY_DN4517_c0_g1_i1	1363	16	3.03395e-155	-0.389219	Downregulated	SA-C vs SA
TRINITY_DN4517_c0_g2_i1	12207	9	1.24803e-250	-0.626341	Downregulated	SA-C vs SA
TRINITY_DN452_c0_g1_i1	1556.24	3	5.3488e-161	-0.543996	Downregulated	SA-C vs SA
TRINITY_DN45300_c0_g1_i1	1	5223	5.39812e-62	0.725042	Upregulated	SA-C vs SA
TRINITY_DN45330_c0_g1_i1	1	17598	4.84483e-105	0.829113	Upregulated	SA-C vs SA
TRINITY_DN45342_c0_g1_i1	50	5326	3.39001e-26	0.391553	Upregulated	SA-C vs SA
TRINITY_DN4535_c0_g4_i1	1	900	3.57988e-19	0.574388	Upregulated	SA-C vs SA
TRINITY_DN45367_c0_g1_i1	1	3783	6.58115e-52	0.697407	Upregulated	SA-C vs SA
TRINITY_DN45388_c0_g1_i1	21	3	1.42164e-10	-0.175122	Downregulated	SA-C vs SA
TRINITY_DN45391_c0_g1_i1	1	13480	4.72427e-95	0.806273	Upregulated	SA-C vs SA
TRINITY_DN45393_c0_g1_i1	8	14834	1.8862e-88	0.636318	Upregulated	SA-C vs SA
TRINITY_DN454_c0_g2_i1	17	6560	4.338e-50	0.501834	Upregulated	SA-C vs SA
TRINITY_DN454_c0_g8_i1	2	1403	3.37145e-25	0.55304	Upregulated	SA-C vs SA
TRINITY_DN454_c0_g9_i1	2	10104	1.3193e-82	0.72219	Upregulated	SA-C vs SA
TRINITY_DN45420_c0_g1_i1	19	8696	9.0975e-58	0.516454	Upregulated	SA-C vs SA
TRINITY_DN45429_c0_g1_i1	20	1730	1.77016e-14	0.373716	Upregulated	SA-C vs SA
TRINITY_DN45472_c0_g1_i1	6553	3	1.36621e-223	-0.667167	Downregulated	SA-C vs SA
TRINITY_DN45474_c0_g1_i1	6	5519	1.07489e-55	0.576256	Upregulated	SA-C vs SA
TRINITY_DN45535_c0_g1_i1	11	37	0.00401524	0.0955191	Upregulated	SA-C vs SA
TRINITY_DN456_c0_g2_i1	30	7620	6.52105e-46	0.466004	Upregulated	SA-C vs SA
TRINITY_DN45669_c0_g1_i1	1	4343	2.97316e-56	0.709234	Upregulated	SA-C vs SA
TRINITY_DN45693_c0_g1_i1	17	1639	4.31198e-15	0.383011	Upregulated	SA-C vs SA
TRINITY_DN45700_c0_g1_i1	24	944	3.3586e-05	0.306198	Upregulated	SA-C vs SA
TRINITY_DN45714_c0_g1_i1	1	1310	6.90143e-26	0.60655	Upregulated	SA-C vs SA
TRINITY_DN45739_c0_g1_i1	18	4694	6.8344e-39	0.468261	Upregulated	SA-C vs SA
TRINITY_DN458_c0_g9_i1	16	7699.59	4.31865e-56	0.520751	Upregulated	SA-C vs SA
TRINITY_DN45800_c0_g1_i1	1	351	5.80491e-08	0.493716	Upregulated	SA-C vs SA
TRINITY_DN45859_c0_g1_i1	23	7396	1.79582e-49	0.486212	Upregulated	SA-C vs SA
TRINITY_DN46011_c0_g1_i1	2100	7	4.50267e-174	-0.497078	Downregulated	SA-C vs SA
TRINITY_DN4605_c1_g2_i2	47.62	0.44	3.16535e-21	-0.409728	Downregulated	SA-C vs SA
TRINITY_DN4605_c1_g2_i5	4454.93	2.56	8.25196e-207	-0.647693	Downregulated	SA-C vs SA
TRINITY_DN461_c0_g1_i11	225.36	1	1.69479e-75	-0.472568	Downregulated	SA-C vs SA
TRINITY_DN461_c0_g1_i6	1196.03	1	1.72397e-149	-0.615565	Downregulated	SA-C vs SA
TRINITY_DN46229_c0_g1_i1	1993	1	8.71426e-172	-0.659313	Downregulated	SA-C vs SA
TRINITY_DN47_c0_g1_i1	199	772	7.18859e-15	0.107741	Upregulated	SA-C vs SA
TRINITY_DN4716_c1_g3_i1	19	87781	2.10899e-150	0.714533	Upregulated	SA-C vs SA
TRINITY_DN472_c1_g2_i1	63	33	4.76291e-30	-0.0638063	Downregulated	SA-C vs SA
TRINITY_DN47490_c0_g1_i1	1	538	3.91525e-12	0.530305	Upregulated	SA-C vs SA
TRINITY_DN477_c0_g1_i2	5964.39	7	1.68976e-219	-0.586511	Downregulated	SA-C vs SA
TRINITY_DN477_c0_g1_i4	14870.1	19	3.30529e-259	-0.579231	Downregulated	SA-C vs SA
TRINITY_DN48_c0_g2_i1	1	7775	3.77989e-75	0.759127	Upregulated	SA-C vs SA
TRINITY_DN48_c0_g4_i1	2	27330	6.12655e-121	0.807441	Upregulated	SA-C vs SA
TRINITY_DN482_c0_g1_i2	28.37	44	1.21325e-10	0.0291925	Upregulated	SA-C vs SA
TRINITY_DN486_c0_g2_i8	43	1	1.57453e-19	-0.330647	Downregulated	SA-C vs SA
TRINITY_DN4868_c0_g1_i1	4082	13	5.16943e-203	-0.500986	Downregulated	SA-C vs SA
TRINITY_DN4871_c0_g2_i1	82	1	1.29898e-34	-0.385952	Downregulated	SA-C vs SA
TRINITY_DN4874_c2_g1_i1	10328.6	3	2.27451e-243	-0.706148	Downregulated	SA-C vs SA
TRINITY_DN4918_c0_g1_i2	14	3298	4.31315e-32	0.459551	Upregulated	SA-C vs SA
TRINITY_DN4918_c0_g3_i1	29	16032	8.10137e-73	0.532635	Upregulated	SA-C vs SA
TRINITY_DN4933_c0_g1_i1	11	3880	4.03901e-39	0.494137	Upregulated	SA-C vs SA
TRINITY_DN494_c0_g3_i1	775	1	1.77682e-130	-0.57839	Downregulated	SA-C vs SA
TRINITY_DN497_c0_g2_i1	19	5028	3.89914e-40	0.469517	Upregulated	SA-C vs SA
TRINITY_DN5_c0_g1_i21	10	42970.8	6.86124e-129	0.708324	Upregulated	SA-C vs SA
TRINITY_DN5_c0_g1_i37	20.58	16206.5	4.06691e-79	0.562947	Upregulated	SA-C vs SA
TRINITY_DN5_c0_g2_i2	24	33842.1	4.84978e-106	0.612858	Upregulated	SA-C vs SA
TRINITY_DN50_c0_g1_i7	15530.6	27	4.2499e-261	-0.552848	Downregulated	SA-C vs SA
TRINITY_DN50022_c0_g1_i1	1	1658	7.44283e-31	0.626733	Upregulated	SA-C vs SA
TRINITY_DN50023_c0_g1_i1	12	1366	7.7439e-15	0.397242	Upregulated	SA-C vs SA
TRINITY_DN50031_c0_g1_i1	9	4602	2.84911e-46	0.52595	Upregulated	SA-C vs SA
TRINITY_DN50074_c0_g1_i1	1	10577	3.10396e-86	0.785495	Upregulated	SA-C vs SA
TRINITY_DN50086_c0_g1_i1	8	6172	8.25532e-57	0.561189	Upregulated	SA-C vs SA
TRINITY_DN50100_c0_g1_i1	79	48050	1.2912e-91	0.540817	Upregulated	SA-C vs SA
TRINITY_DN50114_c0_g1_i1	1	108	0.0155637	0.392735	Upregulated	SA-C vs SA
TRINITY_DN50169_c0_g1_i1	7	762	4.17292e-10	0.393412	Upregulated	SA-C vs SA
TRINITY_DN50198_c0_g1_i1	1	2375	2.88754e-39	0.657524	Upregulated	SA-C vs SA
TRINITY_DN5021_c0_g1_i1	2	9361	1.16902e-79	0.715646	Upregulated	SA-C vs SA
TRINITY_DN50253_c0_g1_i1	1	753	2.61021e-16	0.55911	Upregulated	SA-C vs SA
TRINITY_DN50264_c0_g1_i1	15	12806	2.33044e-75	0.569867	Upregulated	SA-C vs SA
TRINITY_DN50282_c0_g1_i1	1	3035	8.91577e-46	0.678532	Upregulated	SA-C vs SA
TRINITY_DN50284_c0_g1_i1	1	4279	9.77254e-56	0.707962	Upregulated	SA-C vs SA
TRINITY_DN5029_c0_g2_i1	983.17	1	6.62814e-141	-0.598774	Downregulated	SA-C vs SA
TRINITY_DN50328_c0_g1_i1	1	3025	1.07175e-45	0.67825	Upregulated	SA-C vs SA
TRINITY_DN50366_c0_g1_i1	1	6244	1.01897e-67	0.740339	Upregulated	SA-C vs SA
TRINITY_DN50483_c0_g1_i1	21	4387	7.79652e-35	0.449259	Upregulated	SA-C vs SA
TRINITY_DN505_c0_g1_i1	12	9345	9.68138e-67	0.561991	Upregulated	SA-C vs SA
TRINITY_DN50535_c0_g1_i1	13	13156	2.84462e-78	0.584437	Upregulated	SA-C vs SA
TRINITY_DN50598_c0_g1_i1	1	2069	5.90949e-36	0.645706	Upregulated	SA-C vs SA
TRINITY_DN5082_c0_g1_i1	510	1	4.79656e-112	-0.542539	Downregulated	SA-C vs SA
TRINITY_DN50980_c0_g1_i1	14	13	3.02271e-07	-0.0147558	Downregulated	SA-C vs SA
TRINITY_DN51_c0_g1_i3	1	816.55	1.63635e-17	0.566052	Upregulated	SA-C vs SA
TRINITY_DN51120_c0_g1_i1	2	1532	4.88414e-27	0.560577	Upregulated	SA-C vs SA
TRINITY_DN51208_c0_g1_i1	21	131	0.0104472	0.148436	Upregulated	SA-C vs SA
TRINITY_DN514_c0_g1_i1	18	9784	7.44818e-63	0.531186	Upregulated	SA-C vs SA
TRINITY_DN5148_c0_g1_i1	11	30259	1.76027e-113	0.67011	Upregulated	SA-C vs SA
TRINITY_DN515_c0_g2_i2	352.72	3	9.89106e-96	-0.416824	Downregulated	SA-C vs SA
TRINITY_DN5153_c0_g1_i1	353	185	1.89666e-70	-0.0637622	Downregulated	SA-C vs SA
TRINITY_DN5153_c0_g2_i1	276	169	3.59733e-62	-0.0504303	Downregulated	SA-C vs SA
TRINITY_DN51613_c0_g1_i1	14	1	4.1078e-07	-0.234508	Downregulated	SA-C vs SA
TRINITY_DN51690_c0_g1_i1	13	1	7.44748e-07	-0.228158	Downregulated	SA-C vs SA
TRINITY_DN52_c0_g1_i1	35	51620	8.76722e-116	0.616705	Upregulated	SA-C vs SA
TRINITY_DN52_c0_g2_i12	238762	264.31	0	-0.591519	Downregulated	SA-C vs SA
TRINITY_DN52_c0_g2_i6	62	14473	2.47197e-52	0.458771	Upregulated	SA-C vs SA
TRINITY_DN52_c0_g2_i7	3.55059e+06	1682.07	0	-0.664235	Downregulated	SA-C vs SA
TRINITY_DN5202_c2_g1_i1	8	3819	9.53329e-42	0.520063	Upregulated	SA-C vs SA
TRINITY_DN52021_c0_g1_i1	1	736	3.51518e-16	0.557154	Upregulated	SA-C vs SA
TRINITY_DN521_c0_g1_i1	28	13	1.98699e-14	-0.0741411	Downregulated	SA-C vs SA
TRINITY_DN523_c0_g1_i3	805.81	2	3.31293e-132	-0.522345	Downregulated	SA-C vs SA
TRINITY_DN526_c0_g1_i1	4	3692	5.2416e-46	0.57655	Upregulated	SA-C vs SA
TRINITY_DN526_c0_g5_i1	39	13078	3.11988e-59	0.489804	Upregulated	SA-C vs SA
TRINITY_DN5269_c1_g1_i1	1254.85	3	1.30868e-151	-0.525554	Downregulated	SA-C vs SA
TRINITY_DN5270_c0_g1_i1	24	29	1.63327e-10	0.00780675	Upregulated	SA-C vs SA
TRINITY_DN528_c0_g2_i2	1989.28	10	1.03453e-171	-0.461879	Downregulated	SA-C vs SA
TRINITY_DN52830_c0_g1_i1	34	8	2.45896e-16	-0.132371	Downregulated	SA-C vs SA
TRINITY_DN531_c0_g1_i1	19	5904	5.60278e-45	0.483278	Upregulated	SA-C vs SA
TRINITY_DN53312_c0_g1_i1	100	1	3.01101e-41	-0.402954	Downregulated	SA-C vs SA
TRINITY_DN541_c0_g1_i2	22	20799	6.1838e-88	0.578606	Upregulated	SA-C vs SA
TRINITY_DN5440_c0_g2_i1	193.38	1	1.12713e-68	-0.459456	Downregulated	SA-C vs SA
TRINITY_DN5517_c0_g1_i1	19	24	2.97612e-08	0.0116084	Upregulated	SA-C vs SA
TRINITY_DN5523_c0_g1_i3	900	1	4.84013e-137	-0.591201	Downregulated	SA-C vs SA
TRINITY_DN5548_c0_g2_i1	22	7843	4.82822e-52	0.495048	Upregulated	SA-C vs SA
TRINITY_DN558_c0_g3_i1	6809	3	2.94339e-225	-0.67045	Downregulated	SA-C vs SA
TRINITY_DN56_c0_g3_i1	1	7646	1.62571e-74	0.757694	Upregulated	SA-C vs SA
TRINITY_DN56_c0_g4_i1	35	11183	7.71904e-56	0.485664	Upregulated	SA-C vs SA
TRINITY_DN56_c2_g1_i1	12	908	3.23049e-09	0.362252	Upregulated	SA-C vs SA
TRINITY_DN56_c3_g2_i1	1	23362	2.83537e-116	0.853386	Upregulated	SA-C vs SA
TRINITY_DN57_c0_g1_i3	36.59	9421.47	5.71189e-49	0.467173	Upregulated	SA-C vs SA
TRINITY_DN57_c0_g1_i4	0.41	8249.66	9.40681e-80	0.840592	Upregulated	SA-C vs SA
TRINITY_DN576_c0_g1_i3	1259.31	1	9.75957e-152	-0.619982	Downregulated	SA-C vs SA
TRINITY_DN5777_c0_g1_i3	75.17	3	4.18032e-32	-0.284378	Downregulated	SA-C vs SA
TRINITY_DN5777_c1_g1_i1	1630.71	1	4.83821e-163	-0.642125	Downregulated	SA-C vs SA
TRINITY_DN584_c0_g1_i1	1071.27	3	1.11852e-144	-0.512003	Downregulated	SA-C vs SA
TRINITY_DN5848_c0_g1_i1	75	67	7.84222e-29	-0.0180703	Downregulated	SA-C vs SA
TRINITY_DN5849_c0_g1_i1	25	4541	2.63139e-33	0.437277	Upregulated	SA-C vs SA
TRINITY_DN586_c0_g2_i1	284.83	3	3.95652e-86	-0.398509	Downregulated	SA-C vs SA
TRINITY_DN59_c0_g1_i6	6257.18	32.01	1.3485e-221	-0.460379	Downregulated	SA-C vs SA
TRINITY_DN59_c0_g1_i7	37060.7	33.99	7.05223e-299	-0.607638	Downregulated	SA-C vs SA
TRINITY_DN595_c0_g2_i1	2574	30	5.7861e-183	-0.389833	Downregulated	SA-C vs SA
TRINITY_DN597_c0_g2_i1	3307	5	7.54888e-194	-0.564811	Downregulated	SA-C vs SA
TRINITY_DN6_c0_g1_i1	14950.2	2.01	1.95114e-259	-0.772143	Downregulated	SA-C vs SA
TRINITY_DN6_c0_g1_i8	9939.98	94747	0.00285198	0.18476	Upregulated	SA-C vs SA
TRINITY_DN6_c0_g2_i2	131695	17	0	-0.775629	Downregulated	SA-C vs SA
TRINITY_DN60_c0_g1_i11	1482	1	7.32903e-159	-0.633932	Downregulated	SA-C vs SA
TRINITY_DN60_c0_g1_i17	14	88	0.033558	0.149088	Upregulated	SA-C vs SA
TRINITY_DN602_c0_g2_i1	4877.03	1	9.53115e-211	-0.735983	Downregulated	SA-C vs SA
TRINITY_DN602_c0_g4_i1	1092.95	2	1.47995e-145	-0.548458	Downregulated	SA-C vs SA
TRINITY_DN6029_c0_g4_i1	1	5562	6.78696e-64	0.73043	Upregulated	SA-C vs SA
TRINITY_DN6029_c0_g6_i1	1	28316	7.18167e-124	0.869863	Upregulated	SA-C vs SA
TRINITY_DN605_c1_g4_i5	12	12.24	2.75402e-06	-0.00670997	Downregulated	SA-C vs SA
TRINITY_DN608_c1_g1_i1	20	26341	4.57952e-99	0.60701	Upregulated	SA-C vs SA
TRINITY_DN61_c0_g6_i1	33	38911	2.90199e-105	0.597532	Upregulated	SA-C vs SA
TRINITY_DN610_c0_g1_i1	1	9269	1.77472e-81	0.774185	Upregulated	SA-C vs SA
TRINITY_DN610_c0_g3_i1	11	7943	5.4058e-62	0.555519	Upregulated	SA-C vs SA
TRINITY_DN6117_c0_g1_i2	8611.83	1	1.81202e-235	-0.784698	Downregulated	SA-C vs SA
TRINITY_DN612_c0_g2_i2	645.61	1	1.79181e-122	-0.56274	Downregulated	SA-C vs SA
TRINITY_DN612_c0_g4_i1	2335	3	1.09492e-178	-0.578758	Downregulated	SA-C vs SA
TRINITY_DN616_c0_g2_i2	12778.9	10	1.27594e-252	-0.621237	Downregulated	SA-C vs SA
TRINITY_DN616_c0_g3_i1	2653.22	2	2.98937e-184	-0.624442	Downregulated	SA-C vs SA
TRINITY_DN6199_c0_g2_i1	45	46454	2.28259e-105	0.58614	Upregulated	SA-C vs SA
TRINITY_DN62_c0_g1_i10	1719	1	2.47048e-165	-0.646642	Downregulated	SA-C vs SA
TRINITY_DN62_c0_g1_i3	8566.75	763	8.6792e-158	-0.215602	Downregulated	SA-C vs SA
TRINITY_DN628_c0_g1_i1	590	2	1.76348e-118	-0.495638	Downregulated	SA-C vs SA
TRINITY_DN630_c0_g1_i7	15913.6	6	3.75015e-262	-0.683797	Downregulated	SA-C vs SA
TRINITY_DN6321_c0_g1_i1	457	3	3.5046e-107	-0.439015	Downregulated	SA-C vs SA
TRINITY_DN634_c0_g1_i2	15	0.2	2.27396e-07	-0.378307	Downregulated	SA-C vs SA
TRINITY_DN635_c0_g1_i1	115	29136	4.72187e-61	0.465787	Upregulated	SA-C vs SA
TRINITY_DN635_c2_g1_i1	13	1701	4.92482e-18	0.409175	Upregulated	SA-C vs SA
TRINITY_DN640_c0_g2_i1	1088	1	2.40043e-145	-0.607454	Downregulated	SA-C vs SA
TRINITY_DN6406_c0_g1_i1	161	1	1.19849e-60	-0.443756	Downregulated	SA-C vs SA
TRINITY_DN6407_c0_g1_i2	1013.22	1	3.16698e-142	-0.601353	Downregulated	SA-C vs SA
TRINITY_DN6407_c0_g1_i8	139.37	1	2.84274e-54	-0.431395	Downregulated	SA-C vs SA
TRINITY_DN641_c1_g2_i1	797	2	1.01706e-131	-0.521403	Downregulated	SA-C vs SA
TRINITY_DN641_c1_g2_i2	2959	1	5.262e-189	-0.693173	Downregulated	SA-C vs SA
TRINITY_DN6416_c0_g1_i1	15	7513	2.71879e-56	0.524178	Upregulated	SA-C vs SA
TRINITY_DN6421_c0_g2_i1	13	12967	1.04139e-77	0.583197	Upregulated	SA-C vs SA
TRINITY_DN643_c0_g1_i6	2170.73	6	1.60506e-175	-0.513123	Downregulated	SA-C vs SA
TRINITY_DN6448_c0_g1_i3	3982.04	5	6.24446e-202	-0.580725	Downregulated	SA-C vs SA
TRINITY_DN65_c0_g1_i4	8	18037.3	5.78947e-96	0.653069	Upregulated	SA-C vs SA
TRINITY_DN651_c0_g1_i1	274.65	1	1.55215e-84	-0.489514	Downregulated	SA-C vs SA
TRINITY_DN657_c2_g1_i1	3	15316	1.40739e-96	0.72309	Upregulated	SA-C vs SA
TRINITY_DN658_c0_g1_i1	125	2	7.57407e-50	-0.362687	Downregulated	SA-C vs SA
TRINITY_DN6689_c0_g1_i3	296	2	7.97009e-88	-0.436543	Downregulated	SA-C vs SA
TRINITY_DN673_c0_g1_i3	43.87	122919	4.90288e-147	0.671686	Upregulated	SA-C vs SA
TRINITY_DN673_c0_g3_i1	234	306	1.18717e-40	0.014577	Upregulated	SA-C vs SA
TRINITY_DN6761_c0_g11_i1	13	1537	3.28823e-16	0.400489	Upregulated	SA-C vs SA
TRINITY_DN68_c0_g1_i27	1602.44	1	2.94584e-162	-0.640626	Downregulated	SA-C vs SA
TRINITY_DN680_c0_g4_i1	32	1948	1.20205e-11	0.343617	Upregulated	SA-C vs SA
TRINITY_DN680_c1_g1_i2	11	21327	3.59641e-99	0.640139	Upregulated	SA-C vs SA
TRINITY_DN687_c0_g1_i1	11	21	0.000126105	0.0469932	Upregulated	SA-C vs SA
TRINITY_DN687_c0_g1_i3	37	45	7.25215e-15	0.00836385	Upregulated	SA-C vs SA
TRINITY_DN689_c0_g2_i1	18	15601.8	4.01333e-80	0.571165	Upregulated	SA-C vs SA
TRINITY_DN6944_c0_g1_i2	4500.17	3	3.01311e-207	-0.63497	Downregulated	SA-C vs SA
TRINITY_DN6945_c0_g2_i1	52	6169	2.23219e-29	0.400781	Upregulated	SA-C vs SA
TRINITY_DN698_c0_g5_i1	6	1591	1.53533e-22	0.46969	Upregulated	SA-C vs SA
TRINITY_DN698_c0_g8_i2	1	1264.98	4.84155e-25	0.603554	Upregulated	SA-C vs SA
TRINITY_DN6996_c0_g2_i1	4	62306	8.29843e-152	0.818658	Upregulated	SA-C vs SA
TRINITY_DN7_c0_g1_i1	7975.95	4.2	3.90584e-232	-0.655176	Downregulated	SA-C vs SA
TRINITY_DN7_c0_g1_i8	609.16	2.8	6.95968e-120	-0.469549	Downregulated	SA-C vs SA
TRINITY_DN70_c0_g2_i1	13	2837	3.10694e-29	0.453001	Upregulated	SA-C vs SA
TRINITY_DN70_c0_g3_i1	8	2512	9.68811e-31	0.484173	Upregulated	SA-C vs SA
TRINITY_DN70_c0_g4_i1	11	9076	1.19548e-66	0.566943	Upregulated	SA-C vs SA
TRINITY_DN70_c1_g1_i12	26.65	10044.4	5.79882e-57	0.499816	Upregulated	SA-C vs SA
TRINITY_DN70_c1_g1_i2	29.35	3919.05	3.26386e-27	0.410913	Upregulated	SA-C vs SA
TRINITY_DN70_c1_g1_i3	24	18654	4.33444e-82	0.561826	Upregulated	SA-C vs SA
TRINITY_DN70_c1_g2_i1	6	6770	2.23455e-62	0.59376	Upregulated	SA-C vs SA
TRINITY_DN702_c0_g1_i2	163.6	1	1.86676e-61	-0.445128	Downregulated	SA-C vs SA
TRINITY_DN702_c0_g1_i4	436.28	1	4.18556e-105	-0.529163	Downregulated	SA-C vs SA
TRINITY_DN707_c0_g1_i1	22	22	3.93459e-10	-0.00840656	Downregulated	SA-C vs SA
TRINITY_DN71_c0_g2_i1	1	11553	2.557e-89	0.793057	Upregulated	SA-C vs SA
TRINITY_DN711_c0_g1_i8	416.95	1	4.05453e-103	-0.525281	Downregulated	SA-C vs SA
TRINITY_DN7118_c2_g2_i1	1	21981	9.19588e-114	0.848166	Upregulated	SA-C vs SA
TRINITY_DN712_c1_g1_i10	6865.5	27	1.24725e-225	-0.482911	Downregulated	SA-C vs SA
TRINITY_DN712_c1_g1_i11	331.95	1	6.16104e-93	-0.505748	Downregulated	SA-C vs SA
TRINITY_DN712_c1_g3_i1	1342	2	1.58628e-154	-0.566045	Downregulated	SA-C vs SA
TRINITY_DN7122_c0_g1_i2	15	0.16	2.27396e-07	-0.397425	Downregulated	SA-C vs SA
TRINITY_DN7142_c0_g1_i1	1	639.16	2.40572e-14	0.545067	Upregulated	SA-C vs SA
TRINITY_DN716_c0_g1_i1	13	25	4.04722e-05	0.0476186	Upregulated	SA-C vs SA
TRINITY_DN7164_c0_g2_i2	12622	6	4.40829e-252	-0.663943	Downregulated	SA-C vs SA
TRINITY_DN717_c0_g1_i3	11	8	1.3552e-06	-0.0356901	Downregulated	SA-C vs SA
TRINITY_DN72_c0_g2_i2	24	338542	2.97315e-204	0.810162	Upregulated	SA-C vs SA
TRINITY_DN7211_c1_g3_i1	1	3189	5.21705e-47	0.682773	Upregulated	SA-C vs SA
TRINITY_DN7260_c0_g1_i1	13	14691	1.47729e-82	0.593892	Upregulated	SA-C vs SA
TRINITY_DN7298_c0_g1_i1	1	3840	2.0689e-52	0.698688	Upregulated	SA-C vs SA
TRINITY_DN73_c0_g1_i1	3	6792	6.80378e-67	0.653423	Upregulated	SA-C vs SA
TRINITY_DN73_c0_g7_i1	1	3572	2.18215e-50	0.69249	Upregulated	SA-C vs SA
TRINITY_DN73_c0_g9_i1	1	3896	6.58918e-53	0.699929	Upregulated	SA-C vs SA
TRINITY_DN7304_c0_g1_i1	547	1	3.76763e-115	-0.54854	Downregulated	SA-C vs SA
TRINITY_DN735_c0_g2_i3	782.56	4	5.9948e-131	-0.460451	Downregulated	SA-C vs SA
TRINITY_DN736_c0_g1_i1	4912	2	4.67392e-211	-0.67721	Downregulated	SA-C vs SA
TRINITY_DN739_c0_g2_i7	1730.61	1	1.22522e-165	-0.647219	Downregulated	SA-C vs SA
TRINITY_DN74_c0_g1_i7	85672	31	0	-0.68732	Downregulated	SA-C vs SA
TRINITY_DN740_c1_g1_i1	1	1761	3.72617e-32	0.631897	Upregulated	SA-C vs SA
TRINITY_DN744_c0_g4_i1	344742	425	0	-0.582297	Downregulated	SA-C vs SA
TRINITY_DN7446_c0_g1_i1	367.2	3	1.90692e-97	-0.420271	Downregulated	SA-C vs SA
TRINITY_DN7446_c0_g1_i3	792.12	1	1.97912e-131	-0.580262	Downregulated	SA-C vs SA
TRINITY_DN745_c0_g3_i2	110.57	2	3.95577e-45	-0.352177	Downregulated	SA-C vs SA
TRINITY_DN746_c0_g1_i2	109	173	1.64379e-26	0.0311705	Upregulated	SA-C vs SA
TRINITY_DN7480_c0_g1_i1	12496	13	1.19741e-251	-0.596841	Downregulated	SA-C vs SA
TRINITY_DN75_c0_g1_i7	33	5049.12	6.50614e-32	0.422578	Upregulated	SA-C vs SA
TRINITY_DN75_c3_g1_i1	1	3022	1.1752e-45	0.678165	Upregulated	SA-C vs SA
TRINITY_DN753_c0_g2_i3	7333.12	57.36	1.67607e-228	-0.423999	Downregulated	SA-C vs SA
TRINITY_DN753_c0_g2_i4	6668.68	4.63	2.34928e-224	-0.631488	Downregulated	SA-C vs SA
TRINITY_DN753_c0_g2_i5	2919.24	0.01	2.06348e-188	-1.08655	Downregulated	SA-C vs SA
TRINITY_DN7531_c0_g2_i4	641.76	1	3.32295e-122	-0.562228	Downregulated	SA-C vs SA
TRINITY_DN7546_c0_g3_i2	9	13134.7	1.4814e-82	0.615803	Upregulated	SA-C vs SA
TRINITY_DN758_c0_g1_i3	13045.8	1.35	1.62042e-253	-0.79457	Downregulated	SA-C vs SA
TRINITY_DN758_c0_g1_i7	3378.42	0.65	9.06422e-195	-0.741437	Downregulated	SA-C vs SA
TRINITY_DN7606_c0_g1_i5	594.88	1	7.52684e-119	-0.555729	Downregulated	SA-C vs SA
TRINITY_DN765_c0_g1_i1	1	2009	4.16066e-35	0.643185	Upregulated	SA-C vs SA
TRINITY_DN765_c0_g2_i1	1	1788	1.46101e-32	0.633201	Upregulated	SA-C vs SA
TRINITY_DN766_c0_g1_i1	1601.69	2.5	2.94584e-162	-0.562083	Downregulated	SA-C vs SA
TRINITY_DN766_c0_g1_i5	11442.3	2.5	8.12956e-248	-0.730542	Downregulated	SA-C vs SA
TRINITY_DN78_c0_g1_i6	1	295.84	5.15377e-07	0.479068	Upregulated	SA-C vs SA
TRINITY_DN7812_c0_g1_i1	18	58026	1.50446e-133	0.683699	Upregulated	SA-C vs SA
TRINITY_DN784_c0_g1_i1	2940	1	1.0076e-188	-0.692621	Downregulated	SA-C vs SA
TRINITY_DN785_c0_g1_i1	43	195	3.58408e-06	0.121117	Upregulated	SA-C vs SA
TRINITY_DN791_c0_g2_i3	652.68	1	6.19791e-123	-0.563673	Downregulated	SA-C vs SA
TRINITY_DN7917_c0_g1_i1	1219	1	2.52623e-150	-0.617195	Downregulated	SA-C vs SA
TRINITY_DN792_c0_g1_i1	1	1575	1.68538e-29	0.622333	Upregulated	SA-C vs SA
TRINITY_DN793_c0_g1_i8	77.75	6	1.62221e-33	-0.227883	Downregulated	SA-C vs SA
TRINITY_DN797_c0_g1_i1	617.95	2	1.59937e-120	-0.499603	Downregulated	SA-C vs SA
TRINITY_DN797_c0_g1_i3	4701.23	5	3.77912e-209	-0.59495	Downregulated	SA-C vs SA
TRINITY_DN8_c0_g1_i1	15633	5	2.22849e-261	-0.697893	Downregulated	SA-C vs SA
TRINITY_DN80_c0_g1_i34	18.7	43	5.15833e-06	0.062933	Upregulated	SA-C vs SA
TRINITY_DN80_c0_g1_i52	24.92	2	5.64977e-12	-0.224524	Downregulated	SA-C vs SA
TRINITY_DN80_c0_g1_i80	1869	1	5.5378e-169	-0.65381	Downregulated	SA-C vs SA
TRINITY_DN8041_c1_g1_i1	18	783	2.93097e-05	0.314825	Upregulated	SA-C vs SA
TRINITY_DN8045_c1_g2_i1	1	558	9.18169e-13	0.533433	Upregulated	SA-C vs SA
TRINITY_DN81_c1_g1_i12	442.52	2	8.62445e-106	-0.470995	Downregulated	SA-C vs SA
TRINITY_DN81_c1_g1_i8	73.84	1	1.58075e-31	-0.376972	Downregulated	SA-C vs SA
TRINITY_DN8147_c0_g1_i1	2	6415	1.5953e-66	0.683269	Upregulated	SA-C vs SA
TRINITY_DN8148_c0_g3_i4	43021.3	5	2.36071e-305	-0.784623	Downregulated	SA-C vs SA
TRINITY_DN8196_c0_g2_i1	1	4808	1.92778e-59	0.717949	Upregulated	SA-C vs SA
TRINITY_DN82_c0_g1_i1	21	12732	4.63536e-70	0.540543	Upregulated	SA-C vs SA
TRINITY_DN8231_c0_g1_i1	1	20500	2.83692e-111	0.84219	Upregulated	SA-C vs SA
TRINITY_DN8231_c0_g4_i1	13	6096	3.31682e-51	0.518532	Upregulated	SA-C vs SA
TRINITY_DN828_c0_g2_i8	129.37	1	3.69847e-51	-0.425016	Downregulated	SA-C vs SA
TRINITY_DN83_c0_g2_i5	10924.1	26.89	8.23936e-246	-0.523054	Downregulated	SA-C vs SA
TRINITY_DN83_c0_g3_i1	4617	1	2.30201e-208	-0.731289	Downregulated	SA-C vs SA
TRINITY_DN83_c2_g1_i1	208	1	5.42077e-72	-0.4657	Downregulated	SA-C vs SA
TRINITY_DN8305_c0_g1_i1	61	15492	4.55254e-55	0.465993	Upregulated	SA-C vs SA
TRINITY_DN832_c0_g1_i1	1253	1	1.58101e-151	-0.619551	Downregulated	SA-C vs SA
TRINITY_DN8324_c0_g2_i1	32	6731	8.45513e-41	0.449847	Upregulated	SA-C vs SA
TRINITY_DN835_c0_g5_i1	36	9470	1.45979e-49	0.469006	Upregulated	SA-C vs SA
TRINITY_DN8356_c0_g2_i1	9	1668	1.17042e-20	0.439002	Upregulated	SA-C vs SA
TRINITY_DN8363_c0_g3_i1	46	6926.96	5.5166e-35	0.421214	Upregulated	SA-C vs SA
TRINITY_DN8370_c0_g1_i1	18	6240	1.39849e-47	0.492652	Upregulated	SA-C vs SA
TRINITY_DN8370_c0_g2_i1	17	6446	1.7233e-49	0.500332	Upregulated	SA-C vs SA
TRINITY_DN838_c0_g1_i1	574	1	2.85256e-117	-0.552668	Downregulated	SA-C vs SA
TRINITY_DN839_c0_g2_i1	14	11636.7	7.49762e-73	0.567575	Upregulated	SA-C vs SA
TRINITY_DN840_c0_g1_i3	9808.47	27	3.96766e-241	-0.513475	Downregulated	SA-C vs SA
TRINITY_DN841_c0_g1_i3	15	7	3.94049e-08	-0.0737029	Downregulated	SA-C vs SA
TRINITY_DN849_c0_g1_i1	27	4	4.15962e-13	-0.172007	Downregulated	SA-C vs SA
TRINITY_DN8517_c0_g3_i4	79.19	1	1.62221e-33	-0.382965	Downregulated	SA-C vs SA
TRINITY_DN86_c0_g1_i3	2491.16	1.52	1.66365e-181	-0.642555	Downregulated	SA-C vs SA
TRINITY_DN86_c0_g1_i45	586.45	0.48	3.63253e-118	-0.617389	Downregulated	SA-C vs SA
TRINITY_DN86_c0_g2_i4	19987.9	26	4.66689e-272	-0.577699	Downregulated	SA-C vs SA
TRINITY_DN861_c0_g1_i2	615.59	1	2.16106e-120	-0.558661	Downregulated	SA-C vs SA
TRINITY_DN864_c0_g2_i1	2794	3	1.66986e-186	-0.594134	Downregulated	SA-C vs SA
TRINITY_DN865_c0_g1_i4	17.58	56	5.08771e-05	0.0908556	Upregulated	SA-C vs SA
TRINITY_DN868_c1_g1_i1	1	1767	3.25805e-32	0.632188	Upregulated	SA-C vs SA
TRINITY_DN877_c0_g1_i10	18.78	1.56	1.29729e-09	-0.221575	Downregulated	SA-C vs SA
TRINITY_DN877_c0_g1_i11	672	1	3.33686e-124	-0.566173	Downregulated	SA-C vs SA
TRINITY_DN877_c0_g1_i4	1682.16	3.44	2.15321e-164	-0.538937	Downregulated	SA-C vs SA
TRINITY_DN877_c1_g1_i1	21926	17	4.46613e-276	-0.622029	Downregulated	SA-C vs SA
TRINITY_DN877_c1_g2_i4	2615.5	0.5	1.21864e-183	-0.741986	Downregulated	SA-C vs SA
TRINITY_DN8778_c0_g2_i1	1	1132	4.18139e-23	0.594038	Upregulated	SA-C vs SA
TRINITY_DN88_c0_g7_i1	2	9644	8.13702e-81	0.718198	Upregulated	SA-C vs SA
TRINITY_DN8846_c0_g1_i1	7	344	0.00111828	0.325274	Upregulated	SA-C vs SA
TRINITY_DN888_c0_g1_i1	1	7017	1.17216e-71	0.750339	Upregulated	SA-C vs SA
TRINITY_DN888_c0_g10_i1	26	2274	1.4152e-16	0.374663	Upregulated	SA-C vs SA
TRINITY_DN9_c0_g1_i1	8125.22	149	1.4989e-210	-0.351002	Downregulated	SA-C vs SA
TRINITY_DN9_c0_g1_i17	42022.9	8	2.46738e-304	-0.742344	Downregulated	SA-C vs SA
TRINITY_DN9_c1_g1_i3	432.56	1616	4.22057e-18	0.104512	Upregulated	SA-C vs SA
TRINITY_DN90_c0_g1_i2	613.94	1	3.05172e-120	-0.558431	Downregulated	SA-C vs SA
TRINITY_DN90_c0_g1_i8	9714	3	1.0598e-240	-0.700893	Downregulated	SA-C vs SA
TRINITY_DN902_c0_g2_i2	2	10752.1	1.11434e-84	0.727516	Upregulated	SA-C vs SA
TRINITY_DN903_c0_g2_i2	192.22	3	1.99054e-68	-0.364817	Downregulated	SA-C vs SA
TRINITY_DN91_c0_g5_i1	14	30096	6.00315e-110	0.648985	Upregulated	SA-C vs SA
TRINITY_DN91_c6_g1_i1	1	1516	7.55769e-29	0.619062	Upregulated	SA-C vs SA
TRINITY_DN9132_c0_g1_i2	1	2759.29	3.93768e-43	0.670373	Upregulated	SA-C vs SA
TRINITY_DN9132_c0_g2_i1	10	25028	9.49523e-107	0.662014	Upregulated	SA-C vs SA
TRINITY_DN9174_c1_g1_i1	19	3634	5.41652e-31	0.4417	Upregulated	SA-C vs SA
TRINITY_DN9177_c0_g1_i1	519	1	8.26126e-113	-0.544038	Downregulated	SA-C vs SA
TRINITY_DN918_c0_g2_i2	4186.33	1	4.21724e-204	-0.7229	Downregulated	SA-C vs SA
TRINITY_DN9187_c0_g1_i1	1	163	0.000764908	0.428	Upregulated	SA-C vs SA
TRINITY_DN919_c0_g3_i1	82.31	5.44	6.97886e-35	-0.241161	Downregulated	SA-C vs SA
TRINITY_DN919_c0_g3_i4	85.72	0.26	4.46764e-36	-0.505163	Downregulated	SA-C vs SA
TRINITY_DN919_c0_g3_i5	3996.1	1.77	4.43602e-202	-0.669997	Downregulated	SA-C vs SA
TRINITY_DN919_c0_g3_i9	6659.64	6.53	2.68541e-224	-0.601913	Downregulated	SA-C vs SA
TRINITY_DN92_c0_g1_i1	776.86	2	1.30741e-130	-0.51921	Downregulated	SA-C vs SA
TRINITY_DN92_c0_g2_i2	195.83	2	2.39824e-69	-0.401149	Downregulated	SA-C vs SA
TRINITY_DN936_c0_g1_i3	528.97	1	1.14041e-113	-0.545668	Downregulated	SA-C vs SA
TRINITY_DN9391_c0_g1_i1	4759	3	1.10984e-209	-0.639761	Downregulated	SA-C vs SA
TRINITY_DN940_c0_g1_i6	11	1	8.35118e-06	-0.213846	Downregulated	SA-C vs SA
TRINITY_DN95_c0_g2_i1	8	11851	5.96551e-80	0.617083	Upregulated	SA-C vs SA
TRINITY_DN95_c0_g3_i1	1	7791	3.18818e-75	0.759303	Upregulated	SA-C vs SA
TRINITY_DN950_c0_g1_i1	24156	2	2.78061e-280	-0.813678	Downregulated	SA-C vs SA
TRINITY_DN951_c1_g5_i1	969	1	2.77891e-140	-0.59753	Downregulated	SA-C vs SA
TRINITY_DN9523_c0_g1_i1	2	7488	6.76513e-72	0.696519	Upregulated	SA-C vs SA
TRINITY_DN9551_c0_g1_i1	0.31	82.93	0.000672116	0.470446	Upregulated	SA-C vs SA
TRINITY_DN956_c0_g2_i2	388.69	1	4.94252e-100	-0.519268	Downregulated	SA-C vs SA
TRINITY_DN9630_c1_g1_i2	51	10620.5	3.19489e-46	0.448988	Upregulated	SA-C vs SA
TRINITY_DN9630_c2_g1_i1	1	3889	7.66944e-53	0.699775	Upregulated	SA-C vs SA
TRINITY_DN965_c1_g1_i2	5478	1	8.42959e-216	-0.745939	Downregulated	SA-C vs SA
TRINITY_DN97_c0_g1_i3	1	5227.73	4.78956e-62	0.72512	Upregulated	SA-C vs SA
TRINITY_DN97_c0_g1_i5	13	15187.5	7.40302e-84	0.596739	Upregulated	SA-C vs SA
TRINITY_DN97_c0_g3_i1	14	11518	1.83097e-72	0.566696	Upregulated	SA-C vs SA
TRINITY_DN97_c0_g5_i1	1	2889	1.32091e-44	0.674309	Upregulated	SA-C vs SA
TRINITY_DN9781_c1_g1_i10	13	6.29	4.1078e-07	-0.0706056	Downregulated	SA-C vs SA
TRINITY_DN9781_c1_g1_i2	19	1816.75	8.68198e-16	0.382303	Upregulated	SA-C vs SA
TRINITY_DN9781_c1_g1_i7	5.45	5366.09	7.09105e-56	0.582086	Upregulated	SA-C vs SA
TRINITY_DN9781_c1_g1_i8	0.55	796.22	2.58908e-17	0.615111	Upregulated	SA-C vs SA
TRINITY_DN979_c0_g1_i1	249.81	7	2.53764e-80	-0.314677	Downregulated	SA-C vs SA
TRINITY_DN9797_c0_g3_i1	1	3153	1.16048e-46	0.6818	Upregulated	SA-C vs SA
TRINITY_DN98_c0_g1_i1	8	3798	1.47262e-41	0.51959	Upregulated	SA-C vs SA
TRINITY_DN982_c0_g1_i1	6696	5	1.56845e-224	-0.625252	Downregulated	SA-C vs SA
TRINITY_DN983_c0_g1_i1	11	11	1.47851e-05	-0.00840656	Downregulated	SA-C vs SA
TRINITY_DN9832_c0_g3_i3	3	762.98	1.55865e-13	0.466114	Upregulated	SA-C vs SA
TRINITY_DN9832_c1_g4_i1	1	3337	1.75152e-48	0.68666	Upregulated	SA-C vs SA
TRINITY_DN984_c0_g1_i1	2131	2	1.05292e-174	-0.605664	Downregulated	SA-C vs SA
TRINITY_DN986_c0_g2_i4	398.66	1	3.73848e-101	-0.521438	Downregulated	SA-C vs SA
TRINITY_DN988_c0_g1_i3	1	16895	9.16923e-104	0.82562	Upregulated	SA-C vs SA
TRINITY_DN9990_c0_g3_i1	1	24886.8	6.97187e-119	0.858803	Upregulated	SA-C vs SA
TRINITY_DN10401_c1_g1_i1	1	1	3.28823e-16	-0.00840656	Downregulated	SA-C vs SA
TRINITY_DN10429_c0_g1_i2	1	1	2.94584e-162	-0.00840656	Downregulated	SA-C vs SA
TRINITY_DN10814_c1_g1_i1	9	1	1.20205e-11	-0.196654	Downregulated	SA-C vs SA
TRINITY_DN11193_c0_g2_i1	1	1	3.59641e-99	-0.00840656	Downregulated	SA-C vs SA
TRINITY_DN1153_c0_g1_i2	8	11.14	0.000126105	0.0199605	Upregulated	SA-C vs SA
TRINITY_DN11647_c0_g1_i1	3	4	7.25215e-15	0.0162406	Upregulated	SA-C vs SA
TRINITY_DN119_c0_g1_i4	2	7	4.01333e-80	0.0989238	Upregulated	SA-C vs SA
TRINITY_DN1198_c1_g1_i1	7	15	3.01311e-207	0.0568898	Upregulated	SA-C vs SA
TRINITY_DN121_c1_g1_i2	6.37	3.34	2.23219e-29	-0.0637208	Downregulated	SA-C vs SA
TRINITY_DN12180_c0_g1_i1	3	2	1.53533e-22	-0.0431448	Downregulated	SA-C vs SA
TRINITY_DN12537_c0_g1_i1	1	1	4.84155e-25	-0.00840656	Downregulated	SA-C vs SA
TRINITY_DN12691_c0_g1_i2	1	1	8.29843e-152	-0.00840656	Downregulated	SA-C vs SA
TRINITY_DN13326_c0_g1_i6	1	1	3.90584e-232	-0.00840656	Downregulated	SA-C vs SA
TRINITY_DN13326_c1_g1_i1	1	3	6.95968e-120	0.085717	Upregulated	SA-C vs SA
TRINITY_DN13664_c0_g1_i2	1	1	3.10694e-29	-0.00840656	Downregulated	SA-C vs SA
TRINITY_DN13664_c0_g1_i3	1	1	9.68811e-31	-0.00840656	Downregulated	SA-C vs SA
TRINITY_DN13701_c0_g1_i1	1	2	1.19548e-66	0.0509788	Upregulated	SA-C vs SA
TRINITY_DN13713_c0_g1_i1	1	1	5.79882e-57	-0.00840656	Downregulated	SA-C vs SA
TRINITY_DN13905_c0_g1_i1	1	1	3.26386e-27	-0.00840656	Downregulated	SA-C vs SA
TRINITY_DN14049_c0_g1_i1	2	12	4.33444e-82	0.145102	Upregulated	SA-C vs SA
TRINITY_DN14139_c0_g2_i1	1	1	2.23455e-62	-0.00840656	Downregulated	SA-C vs SA
TRINITY_DN14212_c0_g1_i1	7	1	1.86676e-61	-0.175122	Downregulated	SA-C vs SA
TRINITY_DN14618_c1_g1_i2	0.5	2	4.18556e-105	0.110364	Upregulated	SA-C vs SA
TRINITY_DN14712_c0_g1_i2	1	2	3.93459e-10	0.0509788	Upregulated	SA-C vs SA
TRINITY_DN15015_c0_g1_i2	6.67	5.17	2.557e-89	-0.030232	Downregulated	SA-C vs SA
TRINITY_DN15015_c0_g1_i4	1.33	3.83	4.05453e-103	0.0822106	Upregulated	SA-C vs SA
TRINITY_DN15015_c0_g2_i1	0.66	7.72	9.19588e-114	0.202296	Upregulated	SA-C vs SA
TRINITY_DN15015_c0_g2_i2	1	2	1.24725e-225	0.0509788	Upregulated	SA-C vs SA
TRINITY_DN15015_c0_g2_i7	1.68	1.28	6.16104e-93	-0.0317045	Downregulated	SA-C vs SA
TRINITY_DN15017_c0_g2_i1	3	1	1.58628e-154	-0.10253	Downregulated	SA-C vs SA
TRINITY_DN1523_c0_g1_i2	7	7.15	2.27396e-07	-0.00659006	Downregulated	SA-C vs SA
TRINITY_DN1523_c0_g1_i4	4	2	2.40572e-14	-0.0677919	Downregulated	SA-C vs SA
TRINITY_DN1523_c0_g2_i6	4	4	4.04722e-05	-0.00840656	Downregulated	SA-C vs SA
TRINITY_DN1523_c1_g1_i1	1	2	4.40829e-252	0.0509788	Upregulated	SA-C vs SA
TRINITY_DN15286_c0_g1_i1	1	1	1.3552e-06	-0.00840656	Downregulated	SA-C vs SA
TRINITY_DN15554_c0_g2_i1	1	1	2.97315e-204	-0.00840656	Downregulated	SA-C vs SA
TRINITY_DN15947_c1_g1_i1	2	1	5.21705e-47	-0.0677919	Downregulated	SA-C vs SA
TRINITY_DN1609_c0_g1_i1	10	8	1.47729e-82	-0.0275244	Downregulated	SA-C vs SA
TRINITY_DN16484_c0_g1_i2	1	0.73	2.0689e-52	-0.0353694	Downregulated	SA-C vs SA
TRINITY_DN1653_c0_g2_i1	1.16	9.29	6.80378e-67	0.169842	Upregulated	SA-C vs SA
TRINITY_DN16793_c0_g1_i3	5	2	2.18215e-50	-0.0869097	Downregulated	SA-C vs SA
TRINITY_DN168_c0_g1_i2	8	16	6.58918e-53	0.0509788	Upregulated	SA-C vs SA
TRINITY_DN17163_c0_g2_i1	2	1	3.76763e-115	-0.0677919	Downregulated	SA-C vs SA
TRINITY_DN17303_c0_g1_i1	1	3	5.9948e-131	0.085717	Upregulated	SA-C vs SA
TRINITY_DN17303_c0_g2_i1	4	4	4.67392e-211	-0.00840656	Downregulated	SA-C vs SA
TRINITY_DN17871_c0_g2_i1	1	1	1.22522e-165	-0.00840656	Downregulated	SA-C vs SA
TRINITY_DN18182_c1_g1_i2	1	1	0	-0.00840656	Downregulated	SA-C vs SA
TRINITY_DN1846_c0_g2_i1	1	16	3.72617e-32	0.229135	Upregulated	SA-C vs SA
TRINITY_DN18831_c0_g2_i1	1	4	0	0.110364	Upregulated	SA-C vs SA
TRINITY_DN1948_c0_g1_i1	2.53	6.8	1.90692e-97	0.0763006	Upregulated	SA-C vs SA
TRINITY_DN19645_c0_g1_i13	2	5	1.97912e-131	0.0700966	Upregulated	SA-C vs SA
TRINITY_DN19645_c0_g1_i15	1.21	1	3.95577e-45	-0.0247379	Downregulated	SA-C vs SA
TRINITY_DN19645_c0_g1_i8	1	1	1.64379e-26	-0.00840656	Downregulated	SA-C vs SA
TRINITY_DN19645_c3_g1_i4	6	2	1.19741e-251	-0.10253	Downregulated	SA-C vs SA
TRINITY_DN1980_c0_g1_i1	9	10	6.50614e-32	0.000620202	Upregulated	SA-C vs SA
TRINITY_DN20153_c0_g1_i1	2	1	1.1752e-45	-0.0677919	Downregulated	SA-C vs SA
TRINITY_DN20160_c0_g1_i1	2	1	1.67607e-228	-0.0677919	Downregulated	SA-C vs SA
TRINITY_DN20160_c0_g2_i1	2	1	2.34928e-224	-0.0677919	Downregulated	SA-C vs SA
TRINITY_DN20207_c0_g1_i1	1	1	2.06348e-188	-0.00840656	Downregulated	SA-C vs SA
TRINITY_DN20713_c0_g1_i3	1	1	3.32295e-122	-0.00840656	Downregulated	SA-C vs SA
TRINITY_DN212_c1_g1_i16	3	1	1.4814e-82	-0.10253	Downregulated	SA-C vs SA
TRINITY_DN21230_c0_g1_i1	8	2	1.62042e-253	-0.127177	Downregulated	SA-C vs SA
TRINITY_DN22056_c0_g1_i1	2	2	9.06422e-195	-0.00840656	Downregulated	SA-C vs SA
TRINITY_DN22116_c0_g2_i1	5	10	7.52684e-119	0.0509788	Upregulated	SA-C vs SA
TRINITY_DN22298_c0_g1_i1	1	1	4.16066e-35	-0.00840656	Downregulated	SA-C vs SA
TRINITY_DN22405_c0_g1_i1	1	1	1.46101e-32	-0.00840656	Downregulated	SA-C vs SA
TRINITY_DN2248_c0_g2_i1	2	1	2.94584e-162	-0.0677919	Downregulated	SA-C vs SA
TRINITY_DN23359_c0_g1_i2	1	2	8.12956e-248	0.0509788	Upregulated	SA-C vs SA
TRINITY_DN24007_c0_g1_i1	1	1	5.15377e-07	-0.00840656	Downregulated	SA-C vs SA
TRINITY_DN2402_c0_g1_i2	5	2	1.50446e-133	-0.0869097	Downregulated	SA-C vs SA
TRINITY_DN24030_c0_g1_i1	1	2	1.0076e-188	0.0509788	Upregulated	SA-C vs SA
TRINITY_DN24047_c0_g1_i1	1	2	3.58408e-06	0.0509788	Upregulated	SA-C vs SA
TRINITY_DN24103_c0_g1_i3	2	2	6.19791e-123	-0.00840656	Downregulated	SA-C vs SA
TRINITY_DN24382_c0_g2_i1	1	9	2.52623e-150	0.179841	Upregulated	SA-C vs SA
TRINITY_DN25116_c0_g1_i1	1	1	1.68538e-29	-0.00840656	Downregulated	SA-C vs SA
TRINITY_DN25184_c0_g1_i1	1	2	1.62221e-33	0.0509788	Upregulated	SA-C vs SA
TRINITY_DN26377_c0_g1_i1	2	2	1.59937e-120	-0.00840656	Downregulated	SA-C vs SA
TRINITY_DN26630_c0_g1_i1	3	8	3.77912e-209	0.0756259	Upregulated	SA-C vs SA
TRINITY_DN27489_c0_g1_i1	1	1	2.22849e-261	-0.00840656	Downregulated	SA-C vs SA
TRINITY_DN27707_c0_g1_i2	2	10	5.15833e-06	0.129482	Upregulated	SA-C vs SA
TRINITY_DN2778_c0_g1_i1	6	0.2	5.64977e-12	-0.299804	Downregulated	SA-C vs SA
TRINITY_DN278_c1_g1_i11	0.26	1.76	5.5378e-169	0.155437	Upregulated	SA-C vs SA
TRINITY_DN28252_c0_g1_i1	4	2	2.93097e-05	-0.0677919	Downregulated	SA-C vs SA
TRINITY_DN2895_c0_g1_i2	1	3	9.18169e-13	0.085717	Upregulated	SA-C vs SA
TRINITY_DN290_c0_g2_i1	3	2	8.62445e-106	-0.0431448	Downregulated	SA-C vs SA
TRINITY_DN2932_c0_g2_i2	3	2	1.58075e-31	-0.0431448	Downregulated	SA-C vs SA
TRINITY_DN29716_c0_g1_i1	8	14	1.5953e-66	0.0395385	Upregulated	SA-C vs SA
TRINITY_DN29813_c0_g1_i1	2	1	2.36071e-305	-0.0677919	Downregulated	SA-C vs SA
TRINITY_DN30967_c0_g1_i1	10	1	1.92778e-59	-0.20568	Downregulated	SA-C vs SA
TRINITY_DN31024_c0_g1_i1	1	1	4.63536e-70	-0.00840656	Downregulated	SA-C vs SA
TRINITY_DN31070_c0_g1_i1	1	3	2.83692e-111	0.085717	Upregulated	SA-C vs SA
TRINITY_DN31101_c0_g1_i1	2	2	3.31682e-51	-0.00840656	Downregulated	SA-C vs SA
TRINITY_DN31207_c0_g1_i1	1	1	3.69847e-51	-0.00840656	Downregulated	SA-C vs SA
TRINITY_DN32066_c0_g1_i1	2	2	8.23936e-246	-0.00840656	Downregulated	SA-C vs SA
TRINITY_DN32072_c0_g1_i1	2	1	2.30201e-208	-0.0677919	Downregulated	SA-C vs SA
TRINITY_DN32188_c0_g1_i1	4	4	5.42077e-72	-0.00840656	Downregulated	SA-C vs SA
TRINITY_DN3225_c1_g1_i1	4	1	4.55254e-55	-0.127177	Downregulated	SA-C vs SA
TRINITY_DN32689_c0_g1_i1	5	7	1.58101e-151	0.0204207	Upregulated	SA-C vs SA
TRINITY_DN328_c0_g5_i1	1	2	8.45513e-41	0.0509788	Upregulated	SA-C vs SA
TRINITY_DN32847_c0_g1_i1	7.11	5	1.45979e-49	-0.0385697	Downregulated	SA-C vs SA
TRINITY_DN33165_c0_g1_i2	3	6	1.17042e-20	0.0509788	Upregulated	SA-C vs SA
TRINITY_DN33822_c0_g1_i1	8	12	5.5166e-35	0.0263317	Upregulated	SA-C vs SA
TRINITY_DN34092_c0_g1_i1	1	1	1.39849e-47	-0.00840656	Downregulated	SA-C vs SA
TRINITY_DN3421_c0_g2_i5	0.18	2.17	1.7233e-49	0.204883	Upregulated	SA-C vs SA
TRINITY_DN35297_c0_g1_i1	1	1	2.85256e-117	-0.00840656	Downregulated	SA-C vs SA
TRINITY_DN36540_c0_g1_i1	1	2	7.49762e-73	0.0509788	Upregulated	SA-C vs SA
TRINITY_DN37154_c0_g1_i1	1	1	3.96766e-241	-0.00840656	Downregulated	SA-C vs SA
TRINITY_DN37522_c0_g1_i1	1	1	3.94049e-08	-0.00840656	Downregulated	SA-C vs SA
TRINITY_DN37995_c0_g1_i1	2	2	4.15962e-13	-0.00840656	Downregulated	SA-C vs SA
TRINITY_DN38479_c0_g1_i1	1	1	1.62221e-33	-0.00840656	Downregulated	SA-C vs SA
TRINITY_DN38513_c0_g1_i1	1	1	1.66365e-181	-0.00840656	Downregulated	SA-C vs SA
TRINITY_DN38648_c0_g1_i1	1	2	3.63253e-118	0.0509788	Upregulated	SA-C vs SA
TRINITY_DN38685_c0_g1_i2	3	1	4.66689e-272	-0.10253	Downregulated	SA-C vs SA
TRINITY_DN38906_c0_g1_i1	1	4	2.16106e-120	0.110364	Upregulated	SA-C vs SA
TRINITY_DN38963_c0_g1_i1	1	1	1.66986e-186	-0.00840656	Downregulated	SA-C vs SA
TRINITY_DN39322_c0_g1_i1	4	1	5.08771e-05	-0.127177	Downregulated	SA-C vs SA
TRINITY_DN39400_c0_g1_i1	1	1	3.25805e-32	-0.00840656	Downregulated	SA-C vs SA
TRINITY_DN40951_c0_g1_i1	6	16	1.29729e-09	0.075626	Upregulated	SA-C vs SA
TRINITY_DN41056_c0_g1_i1	1	1	3.33686e-124	-0.00840656	Downregulated	SA-C vs SA
TRINITY_DN41137_c0_g1_i1	1	1	2.15321e-164	-0.00840656	Downregulated	SA-C vs SA
TRINITY_DN41611_c0_g1_i1	2	5	4.46613e-276	0.0700966	Upregulated	SA-C vs SA
TRINITY_DN41617_c0_g1_i1	1	11	1.21864e-183	0.197033	Upregulated	SA-C vs SA
TRINITY_DN41995_c0_g1_i1	2	1	4.18139e-23	-0.0677919	Downregulated	SA-C vs SA
TRINITY_DN42156_c0_g1_i1	8	3	8.13702e-81	-0.0924391	Downregulated	SA-C vs SA
TRINITY_DN42690_c0_g1_i1	1	1	0.00111828	-0.00840656	Downregulated	SA-C vs SA
TRINITY_DN42769_c0_g1_i1	2	3	1.17216e-71	0.0263316	Upregulated	SA-C vs SA
TRINITY_DN42793_c0_g1_i1	4	1	1.4152e-16	-0.127177	Downregulated	SA-C vs SA
TRINITY_DN42916_c0_g1_i1	2	1	1.4989e-210	-0.0677919	Downregulated	SA-C vs SA
TRINITY_DN43411_c0_g1_i1	1	1	2.46738e-304	-0.00840656	Downregulated	SA-C vs SA
TRINITY_DN43420_c0_g1_i1	1	2	4.22057e-18	0.0509788	Upregulated	SA-C vs SA
TRINITY_DN43434_c0_g1_i1	1	3	3.05172e-120	0.085717	Upregulated	SA-C vs SA
TRINITY_DN43745_c0_g1_i1	4	1	1.0598e-240	-0.127177	Downregulated	SA-C vs SA
TRINITY_DN44151_c0_g1_i1	5	2	1.11434e-84	-0.0869097	Downregulated	SA-C vs SA
TRINITY_DN44300_c0_g1_i1	1	1	1.99054e-68	-0.00840656	Downregulated	SA-C vs SA
TRINITY_DN45793_c0_g1_i1	1	2	6.00315e-110	0.0509788	Upregulated	SA-C vs SA
TRINITY_DN46005_c0_g1_i1	3	1	7.55769e-29	-0.10253	Downregulated	SA-C vs SA
TRINITY_DN46154_c0_g1_i1	1	1	3.93768e-43	-0.00840656	Downregulated	SA-C vs SA
TRINITY_DN46408_c0_g1_i1	1	1	9.49523e-107	-0.00840656	Downregulated	SA-C vs SA
TRINITY_DN46551_c0_g1_i1	1	5	5.41652e-31	0.129482	Upregulated	SA-C vs SA
TRINITY_DN46953_c0_g1_i1	1	1	8.26126e-113	-0.00840656	Downregulated	SA-C vs SA
TRINITY_DN47220_c0_g1_i1	3	1	4.21724e-204	-0.10253	Downregulated	SA-C vs SA
TRINITY_DN47562_c0_g1_i1	1	1	0.000764908	-0.00840656	Downregulated	SA-C vs SA
TRINITY_DN47668_c0_g1_i1	3	1	6.97886e-35	-0.10253	Downregulated	SA-C vs SA
TRINITY_DN48557_c0_g1_i1	1	2	4.46764e-36	0.0509788	Upregulated	SA-C vs SA
TRINITY_DN48588_c0_g1_i1	8	12	4.43602e-202	0.0263317	Upregulated	SA-C vs SA
TRINITY_DN5_c0_g1_i67	1	7.54	2.68541e-224	0.164676	Upregulated	SA-C vs SA
TRINITY_DN50060_c0_g1_i2	4	2	1.30741e-130	-0.0677919	Downregulated	SA-C vs SA
TRINITY_DN50649_c0_g1_i1	1	1	2.39824e-69	-0.00840656	Downregulated	SA-C vs SA
TRINITY_DN50677_c0_g1_i1	3	1	1.14041e-113	-0.10253	Downregulated	SA-C vs SA
TRINITY_DN50783_c0_g1_i1	2	1	1.10984e-209	-0.0677919	Downregulated	SA-C vs SA
TRINITY_DN51273_c0_g1_i1	3	2	8.35118e-06	-0.0431448	Downregulated	SA-C vs SA
TRINITY_DN51406_c0_g1_i1	5	6	5.96551e-80	0.00721383	Upregulated	SA-C vs SA
TRINITY_DN51911_c0_g1_i1	7	1	3.18818e-75	-0.175122	Downregulated	SA-C vs SA
TRINITY_DN51938_c0_g1_i1	3	7	2.78061e-280	0.0641856	Upregulated	SA-C vs SA
TRINITY_DN52199_c0_g1_i1	1	2	2.77891e-140	0.0509788	Upregulated	SA-C vs SA
TRINITY_DN52278_c0_g1_i1	1	1	6.76513e-72	-0.00840656	Downregulated	SA-C vs SA
TRINITY_DN52288_c0_g1_i1	1	1	0.000672116	-0.00840656	Downregulated	SA-C vs SA
TRINITY_DN52315_c0_g1_i1	7	1	4.94252e-100	-0.175122	Downregulated	SA-C vs SA
TRINITY_DN5285_c0_g1_i1	1	1	3.19489e-46	-0.00840656	Downregulated	SA-C vs SA
TRINITY_DN5285_c0_g1_i5	1	2	7.66944e-53	0.0509788	Upregulated	SA-C vs SA
TRINITY_DN5285_c0_g2_i2	4	3	8.42959e-216	-0.0330537	Downregulated	SA-C vs SA
TRINITY_DN52977_c0_g1_i1	2	1	4.78956e-62	-0.0677919	Downregulated	SA-C vs SA
TRINITY_DN53785_c0_g1_i1	1	1	7.40302e-84	-0.00840656	Downregulated	SA-C vs SA
TRINITY_DN5478_c0_g4_i1	2	4	1.83097e-72	0.0509788	Upregulated	SA-C vs SA
TRINITY_DN5648_c0_g1_i2	2	2	1.32091e-44	-0.00840656	Downregulated	SA-C vs SA
TRINITY_DN6208_c0_g4_i1	1	1	4.1078e-07	-0.00840656	Downregulated	SA-C vs SA
TRINITY_DN624_c0_g3_i1	4	1	8.68198e-16	-0.127177	Downregulated	SA-C vs SA
TRINITY_DN6334_c0_g1_i1	1	1	7.09105e-56	-0.00840656	Downregulated	SA-C vs SA
TRINITY_DN6627_c0_g1_i1	1	2	2.58908e-17	0.0509788	Upregulated	SA-C vs SA
TRINITY_DN7087_c0_g1_i2	2	1	2.53764e-80	-0.0677919	Downregulated	SA-C vs SA
TRINITY_DN723_c0_g1_i1	7	17	1.16048e-46	0.0676131	Upregulated	SA-C vs SA
TRINITY_DN7260_c1_g1_i1	8	11.86	1.47262e-41	0.0253262	Upregulated	SA-C vs SA
TRINITY_DN8374_c0_g1_i1	3	1	1.56845e-224	-0.10253	Downregulated	SA-C vs SA
TRINITY_DN8542_c0_g1_i2	8	1	1.47851e-05	-0.186563	Downregulated	SA-C vs SA
TRINITY_DN8798_c0_g2_i1	1	2	1.55865e-13	0.0509788	Upregulated	SA-C vs SA
TRINITY_DN9096_c0_g1_i1	8	4	1.75152e-48	-0.0677919	Downregulated	SA-C vs SA
TRINITY_DN9724_c0_g1_i2	1	1	1.05292e-174	-0.00840656	Downregulated	SA-C vs SA
TRINITY_DN9830_c0_g1_i5	1	2	3.73848e-101	0.0509788	Upregulated	SA-C vs SA
TRINITY_DN9830_c0_g2_i1	0.04	3.04	9.16923e-104	0.362627	Upregulated	SA-C vs SA
TRINITY_DN9830_c0_g2_i3	2.96	3.96	6.97187e-119	0.0165295	Upregulated	SA-C vs SA
TRINITY_DN9830_c2_g1_i1	1	3	1.10984e-209	0.085717	Upregulated	SA-C vs SA
TRINITY_DN9867_c0_g1_i2	1	1	8.35118e-06	-0.00840656	Downregulated	SA-C vs SA
TRINITY_DN999_c0_g1_i1	10	2	5.96551e-80	-0.146295	Downregulated	SA-C vs SA

## Sheet: Annotated-only
gene_id	SA	SA-C	Pvalue	logFC	category	condition	Uniprot-Id	Protein names	Gene Names	Pathway	Gene Ontology (biological process)	Gene Ontology (cellular component)	Gene Ontology (molecular function)	Gene Names (ORF)	Gene Names (primary)	EC number	Function [CC]	Organism	Entry Name	UniParc	Gene Ontology (GO)	Gene Ontology IDs
TRINITY_DN1262_c0_g7_i1	1	5567	6.41272e-64	0.730507	Upregulated	SA-C vs SA	ZORB_ECO24	Outer membrane protein assembly factor BamA	bamA yaeT SARI_02778		Gram-negative-bacterium-type cell outer membrane assembly [GO:0043165]; protein insertion into membrane [GO:0051205]	Bam protein complex [GO:1990063]			bamA		FUNCTION: Part of the outer membrane protein assembly complex, which is involved in assembly and insertion of beta-barrel proteins into the outer membrane. Constitutes, with BamD, the core component of the assembly machinery. {ECO:0000255|HAMAP-Rule:MF_01430}.	Salmonella arizonae (strain ATCC BAA-731 / CDC346-86 / RSK2980)	BAMA_SALAR	UPI000160321A	Bam protein complex [GO:1990063]; Gram-negative-bacterium-type cell outer membrane assembly [GO:0043165]; protein insertion into membrane [GO:0051205]	GO:0043165; GO:0051205; GO:1990063
TRINITY_DN50074_c0_g1_i1	1	10577	3.10396e-86	0.785495	Upregulated	SA-C vs SA	ZAPA_PSEAE	PTS system glucose-specific EIIA component (EIIA-Glc) (EIII-Glc) (Glucose-specific phosphotransferase enzyme IIA component)	crr STY2670 t0424		phosphoenolpyruvate-dependent sugar phosphotransferase system [GO:0009401]	cytoplasm [GO:0005737]	kinase activity [GO:0016301]; metal ion binding [GO:0046872]		crr		FUNCTION: The phosphoenolpyruvate-dependent sugar phosphotransferase system (sugar PTS), a major carbohydrate active transport system, catalyzes the phosphorylation of incoming sugar substrates concomitantly with their translocation across the cell membrane. The enzyme II complex composed of PtsG and Crr is involved in glucose transport. {ECO:0000250|UniProtKB:P69783}.	Salmonella typhi	PTGA_SALTI	UPI0000059AF8	cytoplasm [GO:0005737]; kinase activity [GO:0016301]; metal ion binding [GO:0046872]; phosphoenolpyruvate-dependent sugar phosphotransferase system [GO:0009401]	GO:0005737; GO:0009401; GO:0016301; GO:0046872
TRINITY_DN576_c0_g1_i3	1259.31	1	9.75957e-152	-0.619982	Downregulated	SA-C vs SA	YXBG_BACSU	Ribonuclease R (RNase R) (EC 3.1.13.1) (Protein VacB)	rnr vacB SF4334 S4602		mRNA catabolic process [GO:0006402]	cytosol [GO:0005829]	exoribonuclease II activity [GO:0008859]; RNA binding [GO:0003723]		rnr	3.1.13.1	FUNCTION: 3'-5' exoribonuclease that releases 5'-nucleoside monophosphates and is involved in maturation of structured RNAs (By similarity). Required for the expression of virulence genes on the large plasmid of S.flexneri at the post-transcriptional level. {ECO:0000255|HAMAP-Rule:MF_01895}.	Shigella flexneri	RNR_SHIFL	UPI00001344B8	cytosol [GO:0005829]; exoribonuclease II activity [GO:0008859]; RNA binding [GO:0003723]; mRNA catabolic process [GO:0006402]	GO:0003723; GO:0005829; GO:0006402; GO:0008859
TRINITY_DN950_c0_g1_i1	24156	2	2.78061e-280	-0.813678	Downregulated	SA-C vs SA	YUTJ_BACSU	Large ribosomal RNA subunit accumulation protein YceD (23S rRNA accumulation protein YceD)	yceD STY1229 t1730		ribosome biogenesis [GO:0042254]	cytosol [GO:0005829]			yceD		FUNCTION: Plays a role in synthesis, processing and/or stability of 23S rRNA. {ECO:0000250|UniProtKB:P0AB28}.	Salmonella typhi	YCED_SALTI	UPI0000059FA1	cytosol [GO:0005829]; ribosome biogenesis [GO:0042254]	GO:0005829; GO:0042254
TRINITY_DN45669_c0_g1_i1	1	4343	2.97316e-56	0.709234	Upregulated	SA-C vs SA	YOHC_ECOL6	Phosphonates import ATP-binding protein PhnC (EC 7.3.2.2)	phnC SA0137			plasma membrane [GO:0005886]	ABC-type phosphonate transporter activity [GO:0015416]; ATP binding [GO:0005524]; ATP hydrolysis activity [GO:0016887]		phnC	7.3.2.2	FUNCTION: Part of the ABC transporter complex PhnCDE involved in phosphonates import. Responsible for energy coupling to the transport system. {ECO:0000255|HAMAP-Rule:MF_01713}.	Staphylococcus aureus (strain N315)	PHNC_STAAN	UPI00000D77F7	plasma membrane [GO:0005886]; ABC-type phosphonate transporter activity [GO:0015416]; ATP binding [GO:0005524]; ATP hydrolysis activity [GO:0016887]	GO:0005524; GO:0005886; GO:0015416; GO:0016887
TRINITY_DN50264_c0_g1_i1	15	12806	2.33044e-75	0.569867	Upregulated	SA-C vs SA	YID1_PSEAE	Phosphoribosylglycinamide formyltransferase (EC 2.1.2.2) (5'-phosphoribosylglycinamide transformylase) (GAR transformylase) (GART)	purN b2500 JW2485	PATHWAY: Purine metabolism; IMP biosynthesis via de novo pathway; N(2)-formyl-N(1)-(5-phospho-D-ribosyl)glycinamide from N(1)-(5-phospho-D-ribosyl)glycinamide (10-formyl THF route): step 1/1. {ECO:0000255|HAMAP-Rule:MF_01930, ECO:0000269|PubMed:8688421}.	'de novo' IMP biosynthetic process [GO:0006189]; DNA damage response [GO:0006974]	cytoplasm [GO:0005737]; cytosol [GO:0005829]	phosphoribosylglycinamide formyltransferase activity [GO:0004644]		purN	2.1.2.2	FUNCTION: Catalyzes the transfer of a formyl group from 10-formyltetrahydrofolate to 5-phospho-ribosyl-glycinamide (GAR), producing 5-phospho-ribosyl-N-formylglycinamide (FGAR) and tetrahydrofolate. {ECO:0000255|HAMAP-Rule:MF_01930, ECO:0000269|PubMed:2185839, ECO:0000269|PubMed:350869}.	Escherichia coli (strain K12)	PUR3_ECOLI	UPI0000110B1A	cytoplasm [GO:0005737]; cytosol [GO:0005829]; phosphoribosylglycinamide formyltransferase activity [GO:0004644]; 'de novo' IMP biosynthetic process [GO:0006189]; DNA damage response [GO:0006974]	GO:0004644; GO:0005737; GO:0005829; GO:0006189; GO:0006974
TRINITY_DN26284_c0_g1_i1	1	3964	1.69759e-53	0.701411	Upregulated	SA-C vs SA	YHJG_ECOLI	Aspartyl/glutamyl-tRNA(Asn/Gln) amidotransferase subunit B (Asp/Glu-ADT subunit B) (EC 6.3.5.-)	gatB SAS1822		glutaminyl-tRNAGln biosynthesis via transamidation [GO:0070681]; translation [GO:0006412]		asparaginyl-tRNA synthase (glutamine-hydrolyzing) activity [GO:0050566]; ATP binding [GO:0005524]; glutaminyl-tRNA synthase (glutamine-hydrolyzing) activity [GO:0050567]		gatB	6.3.5.-	FUNCTION: Allows the formation of correctly charged Asn-tRNA(Asn) or Gln-tRNA(Gln) through the transamidation of misacylated Asp-tRNA(Asn) or Glu-tRNA(Gln) in organisms which lack either or both of asparaginyl-tRNA or glutaminyl-tRNA synthetases. The reaction takes place in the presence of glutamine and ATP through an activated phospho-Asp-tRNA(Asn) or phospho-Glu-tRNA(Gln). {ECO:0000255|HAMAP-Ru…	Staphylococcus aureus (strain MSSA476)	GATB_STAAS	UPI000012B162	asparaginyl-tRNA synthase (glutamine-hydrolyzing) activity [GO:0050566]; ATP binding [GO:0005524]; glutaminyl-tRNA synthase (glutamine-hydrolyzing) activity [GO:0050567]; glutaminyl-tRNAGln biosynthesis via transamidation [GO:0070681]; translation [GO:0006412]	GO:0005524; GO:0006412; GO:0050566; GO:0050567; GO:0070681
TRINITY_DN2248_c0_g2_i1	2	1	2.94584e-162	-0.0677919	Downregulated	SA-C vs SA	YH007_HUMAN	Ferredoxin 1	fdxA PA3621				3 iron, 4 sulfur cluster binding [GO:0051538]; 4 iron, 4 sulfur cluster binding [GO:0051539]; electron transfer activity [GO:0009055]; metal ion binding [GO:0046872]		fdxA		FUNCTION: Ferredoxins are iron-sulfur proteins that transfer electrons in a wide variety of metabolic reactions. {ECO:0000250}.	Pseudomonas aeruginosa (strain ATCC 15692 / DSM 22644 / CIP 104116 / JCM 14847 / LMG 12228 / 1C / PRS 101 / PAO1)	FER1_PSEAE	UPI00000C5A98	3 iron, 4 sulfur cluster binding [GO:0051538]; 4 iron, 4 sulfur cluster binding [GO:0051539]; electron transfer activity [GO:0009055]; metal ion binding [GO:0046872]	GO:0009055; GO:0046872; GO:0051538; GO:0051539
TRINITY_DN2125_c0_g3_i1	17	15676	3.60903e-81	0.576468	Upregulated	SA-C vs SA	YGB4_CUPNE	FAM231A/C-like protein LOC102723383										Homo sapiens (Human)	F231L_HUMAN	UPI00003664E6
TRINITY_DN399_c0_g1_i1	1506	3	1.42456e-159	-0.541185	Downregulated	SA-C vs SA	YFMJ_BACSU	Probable malate:quinone oxidoreductase 2 (EC 1.1.5.4) (MQO 2) (Malate dehydrogenase [quinone] 2)	mqo2 mqoB PA4640	PATHWAY: Carbohydrate metabolism; tricarboxylic acid cycle; oxaloacetate from (S)-malate (quinone route): step 1/1. {ECO:0000255|HAMAP-Rule:MF_00212}.	tricarboxylic acid cycle [GO:0006099]	cytoplasm [GO:0005737]	L-malate dehydrogenase (quinone) activity [GO:0008924]		mqo2	1.1.5.4		Pseudomonas aeruginosa (strain ATCC 15692 / DSM 22644 / CIP 104116 / JCM 14847 / LMG 12228 / 1C / PRS 101 / PAO1)	MQO2_PSEAE	UPI000012F4C0	cytoplasm [GO:0005737]; L-malate dehydrogenase (quinone) activity [GO:0008924]; tricarboxylic acid cycle [GO:0006099]	GO:0005737; GO:0006099; GO:0008924
TRINITY_DN1264_c0_g2_i1	2536	4	2.72967e-182	-0.561186	Downregulated	SA-C vs SA	YFLS_BACSU	Putative transposon Tn552 DNA-invertase bin3	bin3		DNA integration [GO:0015074]; transposition [GO:0032196]		DNA binding [GO:0003677]; DNA strand exchange activity [GO:0000150]		bin3		FUNCTION: Potential DNA invertase.	Staphylococcus aureus	BIN3_STAAU	UPI0000126944	DNA binding [GO:0003677]; DNA strand exchange activity [GO:0000150]; DNA integration [GO:0015074]; transposition [GO:0032196]	GO:0000150; GO:0003677; GO:0015074; GO:0032196
TRINITY_DN2473_c0_g2_i4	157.33	1	1.60202e-59	-0.44178	Downregulated	SA-C vs SA	YERC_BACSU	Flagellar secretion chaperone FliSB (B-type flagellar protein FliS)	fliS PA1095		bacterial-type flagellum assembly [GO:0044780]; bacterial-type flagellum-dependent cell motility [GO:0071973]	cytosol [GO:0005829]			fliS			Pseudomonas aeruginosa (strain ATCC 15692 / DSM 22644 / CIP 104116 / JCM 14847 / LMG 12228 / 1C / PRS 101 / PAO1)	FLISB_PSEAE	UPI000012AA39	cytosol [GO:0005829]; bacterial-type flagellum assembly [GO:0044780]; bacterial-type flagellum-dependent cell motility [GO:0071973]	GO:0005829; GO:0044780; GO:0071973
TRINITY_DN888_c0_g1_i1	1	7017	1.17216e-71	0.750339	Upregulated	SA-C vs SA	YCII_SHIFL	Uncharacterized MFS-type transporter PA14_38730	PA14_38730			plasma membrane [GO:0005886]	transmembrane transporter activity [GO:0022857]					Pseudomonas aeruginosa (strain UCBPP-PA14)	Y3873_PSEAB	UPI000045D23E	plasma membrane [GO:0005886]; transmembrane transporter activity [GO:0022857]	GO:0005886; GO:0022857
TRINITY_DN6029_c0_g4_i1	1	5562	6.78696e-64	0.73043	Upregulated	SA-C vs SA	YCIB_PSEAE	Small ribosomal subunit protein uS12 (30S ribosomal protein S12)	rpsL SAR0550		translation [GO:0006412]	small ribosomal subunit [GO:0015935]	rRNA binding [GO:0019843]; structural constituent of ribosome [GO:0003735]; tRNA binding [GO:0000049]		rpsL		FUNCTION: With S4 and S5 plays an important role in translational accuracy. {ECO:0000255|HAMAP-Rule:MF_00403}.; FUNCTION: Interacts with and stabilizes bases of the 16S rRNA that are involved in tRNA selection in the A site and with the mRNA backbone. Located at the interface of the 30S and 50S subunits, it traverses the body of the 30S subunit contacting proteins on the other side and probably h…	Staphylococcus aureus (strain MRSA252)	RS12_STAAR	UPI0000048026	small ribosomal subunit [GO:0015935]; rRNA binding [GO:0019843]; structural constituent of ribosome [GO:0003735]; tRNA binding [GO:0000049]; translation [GO:0006412]	GO:0000049; GO:0003735; GO:0006412; GO:0015935; GO:0019843
TRINITY_DN95_c0_g2_i1	8	11851	5.96551e-80	0.617083	Upregulated	SA-C vs SA	YCGR_PSEPK	UPF0637 protein SAB0972c	SAB0972c									Staphylococcus aureus (strain bovine RF122 / ET3-1)	Y972_STAAB	UPI00005FE3F9
TRINITY_DN1135_c0_g1_i1	25	20	1.9438e-12	-0.0275244	Downregulated	SA-C vs SA	YCED_SALTI	Carbamate kinase (CKase) (EC 2.7.2.2)	arcC PA5173	PATHWAY: Amino-acid degradation; L-arginine degradation via ADI pathway. {ECO:0000305|PubMed:6286599}.	arginine deiminase pathway [GO:0019546]	cytosol [GO:0005829]	ATP binding [GO:0005524]; carbamate kinase activity [GO:0008804]		arcC	2.7.2.2	FUNCTION: Kinase that plays an important role in arginine catabolism (PubMed:6286599). Catalyzes the phosphorylation of ADP by carbamoyl phosphate (PubMed:6286599). Shows weak activity with acetylphosphate (PubMed:6286599). {ECO:0000269|PubMed:6286599}.	Pseudomonas aeruginosa (strain ATCC 15692 / DSM 22644 / CIP 104116 / JCM 14847 / LMG 12228 / 1C / PRS 101 / PAO1)	ARCC_PSEAE	UPI0000125DA7	cytosol [GO:0005829]; ATP binding [GO:0005524]; carbamate kinase activity [GO:0008804]; arginine deiminase pathway [GO:0019546]	GO:0005524; GO:0005829; GO:0008804; GO:0019546
TRINITY_DN1176_c0_g1_i1	7	2617	1.21059e-32	0.499121	Upregulated	SA-C vs SA	YBHN_ECOLI	Probable 4-amino-4-deoxy-L-arabinose-phosphoundecaprenol flippase subunit ArnE (L-Ara4N-phosphoundecaprenol flippase subunit ArnE) (Undecaprenyl phosphate-aminoarabinose flippase subunit ArnE)	arnE PLES_14761	PATHWAY: Bacterial outer membrane biogenesis; lipopolysaccharide biosynthesis. {ECO:0000255|HAMAP-Rule:MF_01869}.	lipid A biosynthetic process [GO:0009245]; lipopolysaccharide biosynthetic process [GO:0009103]	plasma membrane [GO:0005886]	carbohydrate derivative transmembrane transporter activity [GO:1901505]		arnE		FUNCTION: Translocates 4-amino-4-deoxy-L-arabinose-phosphoundecaprenol (alpha-L-Ara4N-phosphoundecaprenol) from the cytoplasmic to the periplasmic side of the inner membrane. {ECO:0000255|HAMAP-Rule:MF_01869}.	Pseudomonas aeruginosa (strain LESB58)	ARNE_PSEA8	UPI00000C5A68	plasma membrane [GO:0005886]; carbohydrate derivative transmembrane transporter activity [GO:1901505]; lipid A biosynthetic process [GO:0009245]; lipopolysaccharide biosynthetic process [GO:0009103]	GO:0005886; GO:0009103; GO:0009245; GO:1901505
TRINITY_DN4351_c0_g1_i1	6035	3	5.19331e-220	-0.660112	Downregulated	SA-C vs SA	Y972_STAAB	Outer membrane protein OprJ	oprJ PA4597		response to antibiotic [GO:0046677]; transmembrane transport [GO:0055085]	cell outer membrane [GO:0009279]; membrane [GO:0016020]	efflux transmembrane transporter activity [GO:0015562]; transmembrane transporter activity [GO:0022857]		oprJ		FUNCTION: Channel-forming component of a multidrug resistance efflux pump.	Pseudomonas aeruginosa (strain ATCC 15692 / DSM 22644 / CIP 104116 / JCM 14847 / LMG 12228 / 1C / PRS 101 / PAO1)	OPRJ_PSEAE	UPI0000130D97	cell outer membrane [GO:0009279]; membrane [GO:0016020]; efflux transmembrane transporter activity [GO:0015562]; transmembrane transporter activity [GO:0022857]; response to antibiotic [GO:0046677]; transmembrane transport [GO:0055085]	GO:0009279; GO:0015562; GO:0016020; GO:0022857; GO:0046677; GO:0055085
TRINITY_DN86_c0_g1_i45	586.45	0.48	3.63253e-118	-0.617389	Downregulated	SA-C vs SA	Y968_STAAM	Uncharacterized RNA methyltransferase SACOL1957 (EC 2.1.1.-)	SACOL1957		rRNA base methylation [GO:0070475]		4 iron, 4 sulfur cluster binding [GO:0051539]; metal ion binding [GO:0046872]; rRNA (uridine-C5-)-methyltransferase activity [GO:0070041]			2.1.1.-		Staphylococcus aureus (strain COL)	Y1957_STAAC	UPI00004B5C5C	4 iron, 4 sulfur cluster binding [GO:0051539]; metal ion binding [GO:0046872]; rRNA (uridine-C5-)-methyltransferase activity [GO:0070041]; rRNA base methylation [GO:0070475]	GO:0046872; GO:0051539; GO:0070041; GO:0070475
TRINITY_DN1646_c1_g1_i2	4176	4	5.35252e-204	-0.603917	Downregulated	SA-C vs SA	Y886_STAAW	C4-dicarboxylate transport protein 1	dctA1 PA14_01460		L-aspartate transmembrane transport [GO:0070778]	plasma membrane [GO:0005886]	fumarate transmembrane transporter activity [GO:0015138]; malate:proton symporter activity [GO:0015366]; succinate transmembrane transporter activity [GO:0015141]		dctA1		FUNCTION: Responsible for the transport of dicarboxylates such as succinate, fumarate, and malate from the periplasm across the membrane. {ECO:0000255|HAMAP-Rule:MF_01300}.	Pseudomonas aeruginosa (strain UCBPP-PA14)	DCTA1_PSEAB	UPI0000E4488C	plasma membrane [GO:0005886]; fumarate transmembrane transporter activity [GO:0015138]; malate:proton symporter activity [GO:0015366]; succinate transmembrane transporter activity [GO:0015141]; L-aspartate transmembrane transport [GO:0070778]	GO:0005886; GO:0015138; GO:0015141; GO:0015366; GO:0070778
TRINITY_DN9832_c1_g4_i1	1	3337	1.75152e-48	0.68666	Upregulated	SA-C vs SA	Y712_PSEAE	Cell division protein ZapA (Z ring-associated protein ZapA)	zapA PA5227		division septum assembly [GO:0000917]; FtsZ-dependent cytokinesis [GO:0043093]; septin ring assembly [GO:0000921]	cell division site [GO:0032153]; cell septum [GO:0030428]; cytosol [GO:0005829]			zapA		FUNCTION: Activator of cell division through the inhibition of FtsZ GTPase activity, therefore promoting FtsZ assembly into bundles of protofilaments necessary for the formation of the division Z ring. It is recruited early at mid-cell but it is not essential for cell division (By similarity). {ECO:0000250}.	Pseudomonas aeruginosa (strain ATCC 15692 / DSM 22644 / CIP 104116 / JCM 14847 / LMG 12228 / 1C / PRS 101 / PAO1)	ZAPA_PSEAE	UPI00000C5F64	cell division site [GO:0032153]; cell septum [GO:0030428]; cytosol [GO:0005829]; division septum assembly [GO:0000917]; FtsZ-dependent cytokinesis [GO:0043093]; septin ring assembly [GO:0000921]	GO:0000917; GO:0000921; GO:0005829; GO:0030428; GO:0032153; GO:0043093
TRINITY_DN141_c1_g2_i1	1	14295.1	2.11037e-97	0.811304	Upregulated	SA-C vs SA	Y5713_PSEAB	Clumping factor A (Fibrinogen receptor A) (Fibrinogen-binding protein A)	clfA NWMN_0756		cell adhesion [GO:0007155]	extracellular region [GO:0005576]			clfA		FUNCTION: Cell surface-associated protein implicated in virulence. Promotes bacterial attachment exclusively to the gamma-chain of human fibrinogen. Induces formation of bacterial clumps, which diminish the ability of group IIA phospholipase A2 to cause bacterial phospholipid hydrolysis and killing. Significantly decreases macrophage phagocytosis possibly thanks to the clumps, clumped bacteria be…	Staphylococcus aureus (strain Newman)	CLFA_STAAE	UPI00000BB5DF	extracellular region [GO:0005576]; cell adhesion [GO:0007155]	GO:0005576; GO:0007155
TRINITY_DN36086_c0_g1_i1	4	8982	4.84402e-75	0.65272	Upregulated	SA-C vs SA	Y4841_PSEAE	Lipoyl synthase (EC 2.8.1.8) (Lip-syn) (LS) (Lipoate synthase) (Lipoic acid synthase) (Sulfur insertion protein LipA)	lipA PA3996	PATHWAY: Protein modification; protein lipoylation via endogenous pathway; protein N(6)-(lipoyl)lysine from octanoyl-[acyl-carrier-protein]: step 2/2. {ECO:0000255|HAMAP-Rule:MF_00206}.		cytoplasm [GO:0005737]	4 iron, 4 sulfur cluster binding [GO:0051539]; lipoate synthase activity [GO:0016992]; metal ion binding [GO:0046872]		lipA	2.8.1.8	FUNCTION: Catalyzes the radical-mediated insertion of two sulfur atoms into the C-6 and C-8 positions of the octanoyl moiety bound to the lipoyl domains of lipoate-dependent enzymes, thereby converting the octanoylated domains into lipoylated derivatives. {ECO:0000255|HAMAP-Rule:MF_00206}.	Pseudomonas aeruginosa (strain ATCC 15692 / DSM 22644 / CIP 104116 / JCM 14847 / LMG 12228 / 1C / PRS 101 / PAO1)	LIPA_PSEAE	UPI000012E6D0	cytoplasm [GO:0005737]; 4 iron, 4 sulfur cluster binding [GO:0051539]; lipoate synthase activity [GO:0016992]; metal ion binding [GO:0046872]	GO:0005737; GO:0016992; GO:0046872; GO:0051539
TRINITY_DN52_c0_g2_i7	3.55059e+06	1682.07	0	-0.664235	Downregulated	SA-C vs SA	Y478_STAAR	Holliday junction resolvase RecU (EC 3.1.21.10) (Recombination protein U homolog)	recU SAS1392		chromosome segregation [GO:0007059]; DNA recombination [GO:0006310]; DNA repair [GO:0006281]	cytoplasm [GO:0005737]	endonuclease activity [GO:0004519]; magnesium ion binding [GO:0000287]; nucleic acid binding [GO:0003676]		recU	3.1.21.10	FUNCTION: Endonuclease that resolves Holliday junction intermediates in genetic recombination. Cleaves mobile four-strand junctions by introducing symmetrical nicks in paired strands. Promotes annealing of linear ssDNA with homologous dsDNA. Required for DNA repair, homologous recombination and chromosome segregation. {ECO:0000255|HAMAP-Rule:MF_00130}.	Staphylococcus aureus (strain MSSA476)	RECU_STAAS	UPI00000009F1	cytoplasm [GO:0005737]; endonuclease activity [GO:0004519]; magnesium ion binding [GO:0000287]; nucleic acid binding [GO:0003676]; chromosome segregation [GO:0007059]; DNA recombination [GO:0006310]; DNA repair [GO:0006281]	GO:0000287; GO:0003676; GO:0004519; GO:0005737; GO:0006281; GO:0006310; GO:0007059
TRINITY_DN8356_c0_g2_i1	9	1668	1.17042e-20	0.439002	Upregulated	SA-C vs SA	Y4745_PSEAB	Response regulator protein VraR	vraR MW1824		phosphorelay signal transduction system [GO:0000160]; regulation of DNA-templated transcription [GO:0006355]	cytoplasm [GO:0005737]	DNA binding [GO:0003677]		vraR		FUNCTION: Member of the two-component regulatory system VraS/VraR involved in the control of the cell wall peptidoglycan biosynthesis. Upon cellular stress, the histidine kinase VraS transfers the phosphoryl group onto VraR. Upon phosphorylation, VraR dimerizes at the N-terminal domain. In turn, phosphorylation-induced dimerization expands and enhances the VraR binding to its own promoter leading…	Staphylococcus aureus (strain MW2)	VRAR_STAAW	UPI000002E89F	cytoplasm [GO:0005737]; DNA binding [GO:0003677]; phosphorelay signal transduction system [GO:0000160]; regulation of DNA-templated transcription [GO:0006355]	GO:0000160; GO:0003677; GO:0005737; GO:0006355
TRINITY_DN9990_c0_g3_i1	1	24886.8	6.97187e-119	0.858803	Upregulated	SA-C vs SA	Y4473_PSEAE
TRINITY_DN40579_c0_g1_i1	5	3081	2.25167e-39	0.541933	Upregulated	SA-C vs SA	Y4424_PSEAE	Transcriptional regulator MraZ	mraZ PA4421		negative regulation of DNA-templated transcription initiation [GO:2000143]	cytoplasm [GO:0005737]; nucleoid [GO:0009295]	DNA-binding transcription factor activity [GO:0003700]; transcription cis-regulatory region binding [GO:0000976]		mraZ			Pseudomonas aeruginosa (strain ATCC 15692 / DSM 22644 / CIP 104116 / JCM 14847 / LMG 12228 / 1C / PRS 101 / PAO1)	MRAZ_PSEAE	UPI000012F54D	cytoplasm [GO:0005737]; nucleoid [GO:0009295]; DNA-binding transcription factor activity [GO:0003700]; transcription cis-regulatory region binding [GO:0000976]; negative regulation of DNA-templated transcription initiation [GO:2000143]	GO:0000976; GO:0003700; GO:0005737; GO:0009295; GO:2000143
TRINITY_DN3614_c0_g1_i1	1	21405	1.13617e-112	0.845891	Upregulated	SA-C vs SA	Y4219_PSEAE	Octanoyl-[GcvH]:protein N-octanoyltransferase (EC 2.3.1.204) (Octanoyl-[GcvH]:E2 amidotransferase)	lipL SAOUHSC_00575	PATHWAY: Protein modification; protein lipoylation via endogenous pathway; protein N(6)-(lipoyl)lysine from octanoyl-[acyl-carrier-protein]. {ECO:0000255|HAMAP-Rule:MF_02119}.	lipoate biosynthetic process [GO:0009107]		lipoyl(octanoyl) transferase activity [GO:0033819]		lipL	2.3.1.204	FUNCTION: Catalyzes the amidotransfer (transamidation) of the octanoyl moiety from octanoyl-GcvH to the lipoyl domain of the E2 subunit of lipoate-dependent enzymes. {ECO:0000255|HAMAP-Rule:MF_02119}.	Staphylococcus aureus (strain NCTC 8325 / PS 47)	LIPL_STAA8	UPI000005480B	lipoyl(octanoyl) transferase activity [GO:0033819]; lipoate biosynthetic process [GO:0009107]	GO:0009107; GO:0033819
TRINITY_DN13_c0_g6_i1	5	5127	1.37052e-54	0.585564	Upregulated	SA-C vs SA	Y4073_PSEAB	Chitin-binding protein CbpD	cpbD PA14_53250			extracellular region [GO:0005576]	chitin binding [GO:0008061]		cpbD		FUNCTION: Binds but does not hydrolyze chitin. {ECO:0000250|UniProtKB:Q9I589}.	Pseudomonas aeruginosa (strain UCBPP-PA14)	CBPD_PSEAB	UPI000045D059	extracellular region [GO:0005576]; chitin binding [GO:0008061]	GO:0005576; GO:0008061
TRINITY_DN50282_c0_g1_i1	1	3035	8.91577e-46	0.678532	Upregulated	SA-C vs SA	Y3873_PSEAB	N5-carboxyaminoimidazole ribonucleotide mutase (N5-CAIR mutase) (EC 5.4.99.18) (5-(carboxyamino)imidazole ribonucleotide mutase)	purE BSU06420	PATHWAY: Purine metabolism; IMP biosynthesis via de novo pathway; 5-amino-1-(5-phospho-D-ribosyl)imidazole-4-carboxylate from 5-amino-1-(5-phospho-D-ribosyl)imidazole (N5-CAIR route): step 2/2. {ECO:0000255|HAMAP-Rule:MF_01929}.	'de novo' IMP biosynthetic process [GO:0006189]		5-(carboxyamino)imidazole ribonucleotide mutase activity [GO:0034023]		purE	5.4.99.18	FUNCTION: Catalyzes the conversion of N5-carboxyaminoimidazole ribonucleotide (N5-CAIR) to 4-carboxy-5-aminoimidazole ribonucleotide (CAIR). {ECO:0000255|HAMAP-Rule:MF_01929}.	Bacillus subtilis (strain 168)	PURE_BACSU	UPI000006001C	5-(carboxyamino)imidazole ribonucleotide mutase activity [GO:0034023]; 'de novo' IMP biosynthetic process [GO:0006189]	GO:0006189; GO:0034023
TRINITY_DN378_c0_g1_i5	2	11915.3	1.06074e-88	0.736317	Upregulated	SA-C vs SA	Y3854_PSEAE	Methionine import ATP-binding protein MetN 2 (EC 7.4.2.11)	metN2 PA5503			plasma membrane [GO:0005886]	ABC-type D-methionine transporter activity [GO:0033232]; ATP binding [GO:0005524]; ATP hydrolysis activity [GO:0016887]		metN2	7.4.2.11	FUNCTION: Part of the ABC transporter complex MetNIQ involved in methionine import. Responsible for energy coupling to the transport system. {ECO:0000255|HAMAP-Rule:MF_01719}.	Pseudomonas aeruginosa (strain ATCC 15692 / DSM 22644 / CIP 104116 / JCM 14847 / LMG 12228 / 1C / PRS 101 / PAO1)	METN2_PSEAE	UPI00000C603E	plasma membrane [GO:0005886]; ABC-type D-methionine transporter activity [GO:0033232]; ATP binding [GO:0005524]; ATP hydrolysis activity [GO:0016887]	GO:0005524; GO:0005886; GO:0016887; GO:0033232
TRINITY_DN1244_c1_g1_i1	1	7491	9.71596e-74	0.755939	Upregulated	SA-C vs SA	Y3753_PSEAE	ATP synthase subunit a (ATP synthase F0 sector subunit a) (F-ATPase subunit 6)	atpB STY3907 t3648		proton motive force-driven plasma membrane ATP synthesis [GO:0042777]	plasma membrane [GO:0005886]; proton-transporting ATP synthase complex, coupling factor F(o) [GO:0045263]	proton-transporting ATP synthase activity, rotational mechanism [GO:0046933]		atpB		FUNCTION: Key component of the proton channel; it plays a direct role in the translocation of protons across the membrane. {ECO:0000255|HAMAP-Rule:MF_01393}.	Salmonella typhi	ATP6_SALTI	UPI000005A67A	plasma membrane [GO:0005886]; proton-transporting ATP synthase complex, coupling factor F(o) [GO:0045263]; proton-transporting ATP synthase activity, rotational mechanism [GO:0046933]; proton motive force-driven plasma membrane ATP synthesis [GO:0042777]	GO:0005886; GO:0042777; GO:0045263; GO:0046933
TRINITY_DN8305_c0_g1_i1	61	15492	4.55254e-55	0.465993	Upregulated	SA-C vs SA	Y3693_PSEAE	UvrABC system protein B (Protein UvrB) (Excinuclease ABC subunit B)	uvrB SAR0812		nucleotide-excision repair [GO:0006289]; SOS response [GO:0009432]	cytoplasm [GO:0005737]; excinuclease repair complex [GO:0009380]	ATP binding [GO:0005524]; ATP hydrolysis activity [GO:0016887]; DNA binding [GO:0003677]; excinuclease ABC activity [GO:0009381]		uvrB		FUNCTION: The UvrABC repair system catalyzes the recognition and processing of DNA lesions. A damage recognition complex composed of 2 UvrA and 2 UvrB subunits scans DNA for abnormalities. Upon binding of the UvrA(2)B(2) complex to a putative damaged site, the DNA wraps around one UvrB monomer. DNA wrap is dependent on ATP binding by UvrB and probably causes local melting of the DNA helix, facili…	Staphylococcus aureus (strain MRSA252)	UVRB_STAAR	UPI00003B1500	cytoplasm [GO:0005737]; excinuclease repair complex [GO:0009380]; ATP binding [GO:0005524]; ATP hydrolysis activity [GO:0016887]; DNA binding [GO:0003677]; excinuclease ABC activity [GO:0009381]; nucleotide-excision repair [GO:0006289]; SOS response [GO:0009432]	GO:0003677; GO:0005524; GO:0005737; GO:0006289; GO:0009380; GO:0009381; GO:0009432; GO:0016887
TRINITY_DN35971_c0_g1_i1	15	1246	8.04819e-12	0.370246	Upregulated	SA-C vs SA	Y3539_PSEAE	Leucine-rich repeat-containing protein 37A2	LRRC37A2			membrane [GO:0016020]			LRRC37A2			Homo sapiens (Human)	L37A2_HUMAN	UPI0000E59258	membrane [GO:0016020]	GO:0016020
TRINITY_DN45330_c0_g1_i1	1	17598	4.84483e-105	0.829113	Upregulated	SA-C vs SA	Y335_SYNY3	Isochorismate pyruvate lyase (IPL) (EC 4.2.99.21) (Chorismate mutase) (CM) (EC 5.4.99.5) (Salicylate biosynthesis protein)	pchB PA4230	PATHWAY: Siderophore biosynthesis; salicylate biosynthesis. {ECO:0000269|PubMed:7500944}.	chorismate metabolic process [GO:0046417]; pyochelin biosynthetic process [GO:0042864]; salicylic acid biosynthetic process [GO:0009697]		carbon-oxygen lyase activity [GO:0016835]; chorismate mutase activity [GO:0004106]; isochorismate pyruvate lyase activity [GO:0043904]		pchB	4.2.99.21; 5.4.99.5	FUNCTION: Involved in the incorporation of salicylate into the siderophore pyochelin. Catalyzes the elimination of the enolpyruvyl side chain from isochorismate to yield salicylate and pyruvate via a rare pericyclic hydrogen transfer mechanism from C2 to C5. PchB also catalyzes the nonphysiological Claisen rearrangement of chorismate to prephenate in which the pyruvylenol tail is transferred from…	Pseudomonas aeruginosa (strain ATCC 15692 / DSM 22644 / CIP 104116 / JCM 14847 / LMG 12228 / 1C / PRS 101 / PAO1)	PCHB_PSEAE	UPI00001313E9	carbon-oxygen lyase activity [GO:0016835]; chorismate mutase activity [GO:0004106]; isochorismate pyruvate lyase activity [GO:0043904]; chorismate metabolic process [GO:0046417]; pyochelin biosynthetic process [GO:0042864]; salicylic acid biosynthetic process [GO:0009697]	GO:0004106; GO:0009697; GO:0016835; GO:0042864; GO:0043904; GO:0046417
TRINITY_DN454_c0_g8_i1	2	1403	3.37145e-25	0.55304	Upregulated	SA-C vs SA	Y3311_PSEAE
TRINITY_DN31002_c0_g1_i1	46	6407	9.7371e-33	0.414528	Upregulated	SA-C vs SA	Y2604_PSEAE	Heme oxygenase (staphylobilin-producing) 2 (EC 1.14.99.48) (Heme-degrading monooxygenase 2) (Iron-regulated surface determinant 2) (Iron-responsive surface determinant 2)	isdI MW0140		heme catabolic process [GO:0042167]; iron import into cell [GO:0033212]	cytoplasm [GO:0005737]	heme binding [GO:0020037]; heme oxygenase (decyclizing) activity [GO:0004392]; iron ion binding [GO:0005506]		isdI	1.14.99.48	FUNCTION: Allows bacterial pathogens to use the host heme as an iron source. Catalyzes the oxidative degradation of the heme macrocyclic porphyrin ring to the oxo-bilirubin chromophore staphylobilin (a mixture of the linear tetrapyrroles 5-oxo-delta-bilirubin and 15-oxo-beta-bilirubin) in the presence of a suitable electron donor such as ascorbate or NADPH--cytochrome P450 reductase, with subsequ…	Staphylococcus aureus (strain MW2)	HDOX2_STAAW	UPI00000D77A8	cytoplasm [GO:0005737]; heme binding [GO:0020037]; heme oxygenase (decyclizing) activity [GO:0004392]; iron ion binding [GO:0005506]; heme catabolic process [GO:0042167]; iron import into cell [GO:0033212]	GO:0004392; GO:0005506; GO:0005737; GO:0020037; GO:0033212; GO:0042167
TRINITY_DN1115_c0_g1_i2	1062	4	2.65733e-144	-0.486611	Downregulated	SA-C vs SA	Y2523_STAAM	1,6-anhydro-N-acetylmuramyl-L-alanine amidase AmpD (EC 3.5.1.28) (N-acetylmuramoyl-L-alanine amidase)	ampD SL1344_0146		cell wall organization [GO:0071555]; peptidoglycan catabolic process [GO:0009253]; peptidoglycan turnover [GO:0009254]	cytoplasm [GO:0005737]	metal ion binding [GO:0046872]; N-acetylmuramoyl-L-alanine amidase activity [GO:0008745]		ampD	3.5.1.28	FUNCTION: Involved in cell wall peptidoglycan recycling. Specifically cleaves the amide bond between the lactyl group of N-acetylmuramic acid and the alpha-amino group of the L-alanine in degradation products containing an anhydro N-acetylmuramyl moiety. {ECO:0000250|UniProtKB:P13016}.	Salmonella typhimurium (strain SL1344)	AMPD_SALTS	UPI000017042A	cytoplasm [GO:0005737]; metal ion binding [GO:0046872]; N-acetylmuramoyl-L-alanine amidase activity [GO:0008745]; cell wall organization [GO:0071555]; peptidoglycan catabolic process [GO:0009253]; peptidoglycan turnover [GO:0009254]	GO:0005737; GO:0008745; GO:0009253; GO:0009254; GO:0046872; GO:0071555
TRINITY_DN640_c0_g2_i1	1088	1	2.40043e-145	-0.607454	Downregulated	SA-C vs SA	Y2365_STAAC	Adenosylhomocysteinase (EC 3.13.2.1) (S-adenosyl-L-homocysteine hydrolase) (AdoHcyase)	ahcY PLES_04301	PATHWAY: Amino-acid biosynthesis; L-homocysteine biosynthesis; L-homocysteine from S-adenosyl-L-homocysteine: step 1/1. {ECO:0000255|HAMAP-Rule:MF_00563}.	L-homocysteine biosynthetic process [GO:0071269]; one-carbon metabolic process [GO:0006730]; S-adenosylmethionine cycle [GO:0033353]	cytosol [GO:0005829]	adenosylhomocysteinase activity [GO:0004013]		ahcY	3.13.2.1	FUNCTION: May play a key role in the regulation of the intracellular concentration of adenosylhomocysteine. {ECO:0000255|HAMAP-Rule:MF_00563}.	Pseudomonas aeruginosa (strain LESB58)	SAHH_PSEA8	UPI0000135502	cytosol [GO:0005829]; adenosylhomocysteinase activity [GO:0004013]; L-homocysteine biosynthetic process [GO:0071269]; one-carbon metabolic process [GO:0006730]; S-adenosylmethionine cycle [GO:0033353]	GO:0004013; GO:0005829; GO:0006730; GO:0033353; GO:0071269
TRINITY_DN102_c1_g3_i1	3	29216	5.85559e-122	0.77842	Upregulated	SA-C vs SA	Y2077_PSEAB	Methyl-accepting chemotaxis protein Aer (Aerotaxis receptor Aer)	aer tlpC PA1561		aerotaxis [GO:0009454]; positive aerotaxis [GO:0052131]; signal transduction [GO:0007165]	plasma membrane [GO:0005886]	transmembrane signaling receptor activity [GO:0004888]		aer		FUNCTION: Chemotactic transducer for aerotaxis. {ECO:0000269|PubMed:14987771}.	Pseudomonas aeruginosa (strain ATCC 15692 / DSM 22644 / CIP 104116 / JCM 14847 / LMG 12228 / 1C / PRS 101 / PAO1)	AER_PSEAE	UPI00000C53DF	plasma membrane [GO:0005886]; transmembrane signaling receptor activity [GO:0004888]; aerotaxis [GO:0009454]; positive aerotaxis [GO:0052131]; signal transduction [GO:0007165]	GO:0004888; GO:0005886; GO:0007165; GO:0009454; GO:0052131
TRINITY_DN1292_c0_g2_i1	724	1	1.74386e-127	-0.572558	Downregulated	SA-C vs SA	Y1957_STAAC	Phosphoenolpyruvate carboxylase (PEPC) (PEPCase) (EC 4.1.1.31)	ppc PA3687		carbon fixation [GO:0015977]; oxaloacetate metabolic process [GO:0006107]; tricarboxylic acid cycle [GO:0006099]	cytosol [GO:0005829]	magnesium ion binding [GO:0000287]; phosphoenolpyruvate carboxylase activity [GO:0008964]		ppc	4.1.1.31	FUNCTION: Forms oxaloacetate, a four-carbon dicarboxylic acid source for the tricarboxylic acid cycle. {ECO:0000255|HAMAP-Rule:MF_00595}.	Pseudomonas aeruginosa (strain ATCC 15692 / DSM 22644 / CIP 104116 / JCM 14847 / LMG 12228 / 1C / PRS 101 / PAO1)	CAPP_PSEAE	UPI0000126EFA	cytosol [GO:0005829]; magnesium ion binding [GO:0000287]; phosphoenolpyruvate carboxylase activity [GO:0008964]; carbon fixation [GO:0015977]; oxaloacetate metabolic process [GO:0006107]; tricarboxylic acid cycle [GO:0006099]	GO:0000287; GO:0005829; GO:0006099; GO:0006107; GO:0008964; GO:0015977
TRINITY_DN1559_c0_g3_i1	1540	1	1.53409e-160	-0.637221	Downregulated	SA-C vs SA	Y1897_STAAM	Heme A synthase (HAS) (EC 1.17.99.9) (Cytochrome aa3-controlling protein)	ctaA SA0964	PATHWAY: Porphyrin-containing compound metabolism; heme A biosynthesis; heme A from heme O: step 1/1. {ECO:0000255|HAMAP-Rule:MF_01664}.	heme A biosynthetic process [GO:0006784]	plasma membrane [GO:0005886]	metal ion binding [GO:0046872]; oxidoreductase activity, acting on NAD(P)H, heme protein as acceptor [GO:0016653]		ctaA	1.17.99.9	FUNCTION: Catalyzes the conversion of heme O to heme A by two successive hydroxylations of the methyl group at C8. The first hydroxylation forms heme I, the second hydroxylation results in an unstable dihydroxymethyl group, which spontaneously dehydrates, resulting in the formyl group of heme A. {ECO:0000255|HAMAP-Rule:MF_01664}.	Staphylococcus aureus (strain N315)	CTAA_STAAN	UPI00000D7693	plasma membrane [GO:0005886]; metal ion binding [GO:0046872]; oxidoreductase activity, acting on NAD(P)H, heme protein as acceptor [GO:0016653]; heme A biosynthetic process [GO:0006784]	GO:0005886; GO:0006784; GO:0016653; GO:0046872
TRINITY_DN861_c0_g1_i2	615.59	1	2.16106e-120	-0.558661	Downregulated	SA-C vs SA	Y186_STAAW	Uncharacterized lipoprotein SACOL2365	SACOL2365			plasma membrane [GO:0005886]						Staphylococcus aureus (strain COL)	Y2365_STAAC	UPI0000054A31	plasma membrane [GO:0005886]	GO:0005886
TRINITY_DN1559_c0_g2_i1	1157	1	4.85645e-148	-0.612722	Downregulated	SA-C vs SA	Y1838_STAAW	Cancer/testis antigen 47A (Cancer/testis antigen 47) (CT47)	CT47A1 CT47.1; CT47A2 CT47.2; CT47A3 CT47.3; CT47A4 CT47.4; CT47A5 CT47.5; CT47A6 CT47.6; CT47A7 CT47.7; CT47A8 CT47.8; CT47A9 CT47.9; CT47A10 CT47.10; CT47A11 CT47.11; CT47A12 CT47.12					; ; ; ; ; ; ; ; ; ; ;	CT47A1; CT47A2; CT47A3; CT47A4; CT47A5; CT47A6; CT47A7; CT47A8; CT47A9; CT47A10; CT47A11; CT47A12			Homo sapiens (Human)	CT47A_HUMAN	UPI000013EEB5
TRINITY_DN1262_c11_g1_i1	3	11393	3.35169e-85	0.697739	Upregulated	SA-C vs SA	Y1579_PSEAE	Malonate-semialdehyde dehydrogenase (EC 1.2.1.27) (3-oxopropanoate dehydrogenase)	bauC PA0130		beta-alanine biosynthetic process [GO:0019483]; thymine catabolic process [GO:0006210]; valine catabolic process [GO:0006574]		methylmalonate-semialdehyde dehydrogenase (acylating, NAD) activity [GO:0004491]		bauC	1.2.1.27	FUNCTION: Involved in the degradation of beta-alanine. Likely catalyzes the NAD(+)- and CoA-dependent oxidative decarboxylation of malonate semialdehyde (3-oxopropanoate) to acetyl-CoA. {ECO:0000269|PubMed:21622750}.	Pseudomonas aeruginosa (strain ATCC 15692 / DSM 22644 / CIP 104116 / JCM 14847 / LMG 12228 / 1C / PRS 101 / PAO1)	BAUC_PSEAE	UPI00000C4F52	methylmalonate-semialdehyde dehydrogenase (acylating, NAD) activity [GO:0004491]; beta-alanine biosynthetic process [GO:0019483]; thymine catabolic process [GO:0006210]; valine catabolic process [GO:0006574]	GO:0004491; GO:0006210; GO:0006574; GO:0019483
TRINITY_DN680_c0_g4_i1	32	1948	1.20205e-11	0.343617	Upregulated	SA-C vs SA	Y0859_MYCTU	Superoxide dismutase [Fe] (EC 1.15.1.1)	sodB STY1691 t1299				metal ion binding [GO:0046872]; superoxide dismutase activity [GO:0004784]		sodB	1.15.1.1	FUNCTION: Destroys superoxide anion radicals which are normally produced within the cells and which are toxic to biological systems. {ECO:0000250}.	Salmonella typhi	SODF_SALTI	UPI0000059E13	metal ion binding [GO:0046872]; superoxide dismutase activity [GO:0004784]	GO:0004784; GO:0046872
TRINITY_DN5148_c0_g1_i1	11	30259	1.76027e-113	0.67011	Upregulated	SA-C vs SA	XPT_PSEA7	D-ribose pyranase (EC 5.4.99.62)	rbsD SAV0269	PATHWAY: Carbohydrate metabolism; D-ribose degradation; D-ribose 5-phosphate from beta-D-ribopyranose: step 1/2. {ECO:0000255|HAMAP-Rule:MF_01661}.	D-ribose catabolic process [GO:0019303]	cytosol [GO:0005829]	D-ribose pyranase activity [GO:0062193]; intramolecular lyase activity [GO:0016872]; monosaccharide binding [GO:0048029]		rbsD	5.4.99.62	FUNCTION: Catalyzes the interconversion of beta-pyran and beta-furan forms of D-ribose. {ECO:0000255|HAMAP-Rule:MF_01661}.	Staphylococcus aureus (strain Mu50 / ATCC 700699)	RBSD_STAAM	UPI0000054673	cytosol [GO:0005829]; D-ribose pyranase activity [GO:0062193]; intramolecular lyase activity [GO:0016872]; monosaccharide binding [GO:0048029]; D-ribose catabolic process [GO:0019303]	GO:0005829; GO:0016872; GO:0019303; GO:0048029; GO:0062193
TRINITY_DN745_c0_g3_i2	110.57	2	3.95577e-45	-0.352177	Downregulated	SA-C vs SA	VRAR_STAAW	Probable acetyl-CoA acyltransferase (EC 2.3.1.9) (Acetoacetyl-CoA thiolase)	SAOUHSC_00336			cytoplasm [GO:0005737]	acetyl-CoA C-acetyltransferase activity [GO:0003985]			2.3.1.9		Staphylococcus aureus (strain NCTC 8325 / PS 47)	THLA_STAA8	UPI000005456C	cytoplasm [GO:0005737]; acetyl-CoA C-acetyltransferase activity [GO:0003985]	GO:0003985; GO:0005737
TRINITY_DN4459_c0_g2_i1	1688	1	1.52746e-164	-0.645083	Downregulated	SA-C vs SA	VRAC_STAA1	PA-I galactophilic lectin (PA-IL) (Galactose-binding lectin)	lecA pa1L PA2570		heterophilic cell-cell adhesion via plasma membrane cell adhesion molecules [GO:0007157]	cell surface [GO:0009986]; cytoplasm [GO:0005737]; periplasmic space [GO:0042597]	carbohydrate binding [GO:0030246]		lecA		FUNCTION: D-galactose specific lectin. Binds in decreasing order of affinity: melibiose, methyl-alpha-D-galactoside, D-galactose, methyl-beta-D-galactoside, N-acetyl-D-galactosamine. Similar to plant lectins in its selective (carbohydrate-specific) hemagglutinating activity.	Pseudomonas aeruginosa (strain ATCC 15692 / DSM 22644 / CIP 104116 / JCM 14847 / LMG 12228 / 1C / PRS 101 / PAO1)	PA1L_PSEAE	UPI0000165EC5	cell surface [GO:0009986]; cytoplasm [GO:0005737]; periplasmic space [GO:0042597]; carbohydrate binding [GO:0030246]; heterophilic cell-cell adhesion via plasma membrane cell adhesion molecules [GO:0007157]	GO:0005737; GO:0007157; GO:0009986; GO:0030246; GO:0042597
TRINITY_DN10429_c0_g1_i2	1	1	2.94584e-162	-0.00840656	Downregulated	SA-C vs SA	VCX3_HUMAN	Arf-GAP with GTPase, ANK repeat and PH domain-containing protein 9 (AGAP-9) (Centaurin-gamma-like family member 6)	AGAP9 CTGLF6				GTPase activator activity [GO:0005096]; GTPase activity [GO:0003924]; metal ion binding [GO:0046872]		AGAP9		FUNCTION: Putative GTPase-activating protein. {ECO:0000305}.	Homo sapiens (Human)	AGAP9_HUMAN	UPI0000F6E72B	GTPase activator activity [GO:0005096]; GTPase activity [GO:0003924]; metal ion binding [GO:0046872]	GO:0003924; GO:0005096; GO:0046872
TRINITY_DN83_c0_g3_i1	4617	1	2.30201e-208	-0.731289	Downregulated	SA-C vs SA	UVRB_STAAR	Urease subunit gamma (EC 3.5.1.5) (Urea amidohydrolase subunit gamma)	ureA PA4865	PATHWAY: Nitrogen metabolism; urea degradation; CO(2) and NH(3) from urea (urease route): step 1/1. {ECO:0000255|HAMAP-Rule:MF_00739}.	urea catabolic process [GO:0043419]	cytoplasm [GO:0005737]	nickel cation binding [GO:0016151]; urease activity [GO:0009039]		ureA	3.5.1.5		Pseudomonas aeruginosa (strain ATCC 15692 / DSM 22644 / CIP 104116 / JCM 14847 / LMG 12228 / 1C / PRS 101 / PAO1)	URE3_PSEAE	UPI00000C5E47	cytoplasm [GO:0005737]; nickel cation binding [GO:0016151]; urease activity [GO:0009039]; urea catabolic process [GO:0043419]	GO:0005737; GO:0009039; GO:0016151; GO:0043419
TRINITY_DN38531_c0_g1_i1	11	7	1.3552e-06	-0.0471304	Downregulated	SA-C vs SA	USPA_SALTY	3-hydroxyisobutyrate dehydrogenase (HIBADH) (EC 1.1.1.31)	mmsB PA3569	PATHWAY: Amino-acid degradation; L-valine degradation. {ECO:0000269|PubMed:1339433}.	valine catabolic process [GO:0006574]		3-hydroxyisobutyrate dehydrogenase activity [GO:0008442]; NAD binding [GO:0051287]; NADP binding [GO:0050661]; oxidoreductase activity, acting on the CH-OH group of donors, NAD or NADP as acceptor [GO:0016616]		mmsB	1.1.1.31		Pseudomonas aeruginosa (strain ATCC 15692 / DSM 22644 / CIP 104116 / JCM 14847 / LMG 12228 / 1C / PRS 101 / PAO1)	MMSB_PSEAE	UPI000012F296	3-hydroxyisobutyrate dehydrogenase activity [GO:0008442]; NAD binding [GO:0051287]; NADP binding [GO:0050661]; oxidoreductase activity, acting on the CH-OH group of donors, NAD or NADP as acceptor [GO:0016616]; valine catabolic process [GO:0006574]	GO:0006574; GO:0008442; GO:0016616; GO:0050661; GO:0051287
TRINITY_DN1593_c1_g1_i2	1	1817	1.17586e-32	0.634579	Upregulated	SA-C vs SA	URE3_PSEAE	Cadmium, cobalt and zinc/H(+)-K(+) antiporter	czcD RBAM_005600		cobalt ion transport [GO:0006824]; potassium ion transport [GO:0006813]	plasma membrane [GO:0005886]	zinc ion transmembrane transporter activity [GO:0005385]		czcD		FUNCTION: Involved in divalent cation and potassium homeostasis in the cell. Catalyzes the active efflux of zinc, cadmium and cobalt, in exchange for potassium and H(+) ions (By similarity). {ECO:0000250}.	Bacillus velezensis (strain DSM 23117 / BGSC 10A6 / LMG 26770 / FZB42) (Bacillus amyloliquefaciens subsp. plantarum)	CZCD_BACVZ	UPI00015972C0	plasma membrane [GO:0005886]; zinc ion transmembrane transporter activity [GO:0005385]; cobalt ion transport [GO:0006824]; potassium ion transport [GO:0006813]	GO:0005385; GO:0005886; GO:0006813; GO:0006824
TRINITY_DN97_c0_g5_i1	1	2889	1.32091e-44	0.674309	Upregulated	SA-C vs SA	URE2_PSEA7	Putative hydroxypyruvate isomerase (EC 5.3.1.22) (Glyoxylate-induced protein)			glyoxylate metabolic process [GO:0046487]		hydroxypyruvate isomerase activity [GO:0008903]			5.3.1.22	FUNCTION: Catalyzes the reversible isomerization between hydroxypyruvate and 2-hydroxy-3-oxopropanoate (also termed tartronate semialdehyde). {ECO:0000250}.	Cupriavidus necator (Alcaligenes eutrophus) (Ralstonia eutropha)	YGB4_CUPNE	UPI000013B01F	hydroxypyruvate isomerase activity [GO:0008903]; glyoxylate metabolic process [GO:0046487]	GO:0008903; GO:0046487
TRINITY_DN14192_c0_g2_i1	2299	3	5.17499e-178	-0.577427	Downregulated	SA-C vs SA	UPPP_STAAC	Clumping factor A (Fibrinogen receptor A) (Fibrinogen-binding protein A)	clfA fnb SAV0811		cell adhesion [GO:0007155]	extracellular region [GO:0005576]			clfA		FUNCTION: Cell surface-associated protein implicated in virulence. Promotes bacterial attachment exclusively to the gamma-chain of human fibrinogen. Induces formation of bacterial clumps (By similarity). {ECO:0000250}.	Staphylococcus aureus (strain Mu50 / ATCC 700699)	CLFA_STAAM	UPI00000CAE7F	extracellular region [GO:0005576]; cell adhesion [GO:0007155]	GO:0005576; GO:0007155
TRINITY_DN6029_c0_g6_i1	1	28316	7.18167e-124	0.869863	Upregulated	SA-C vs SA	UBIC_PSEAB	Small ribosomal subunit protein uS14 (30S ribosomal protein S14)	rpsN SCH_3361		translation [GO:0006412]	cytoplasm [GO:0005737]; small ribosomal subunit [GO:0015935]	rRNA binding [GO:0019843]; structural constituent of ribosome [GO:0003735]		rpsN		FUNCTION: Binds 16S rRNA, required for the assembly of 30S particles and may also be responsible for determining the conformation of the 16S rRNA at the A site. {ECO:0000255|HAMAP-Rule:MF_00537}.	Salmonella choleraesuis (strain SC-B67)	RS14_SALCH	UPI000005A7F8	cytoplasm [GO:0005737]; small ribosomal subunit [GO:0015935]; rRNA binding [GO:0019843]; structural constituent of ribosome [GO:0003735]; translation [GO:0006412]	GO:0003735; GO:0005737; GO:0006412; GO:0015935; GO:0019843
TRINITY_DN1996_c0_g1_i5	28.56	0.52	8.98453e-14	-0.351615	Downregulated	SA-C vs SA	U17LH_HUMAN	Elongation factor Tu 2 (EF-Tu 2)	tuf2 ECP_4193			cytosol [GO:0005829]	GTP binding [GO:0005525]; GTPase activity [GO:0003924]; guanosine tetraphosphate binding [GO:0097216]; translation elongation factor activity [GO:0003746]		tuf2		FUNCTION: This protein promotes the GTP-dependent binding of aminoacyl-tRNA to the A-site of ribosomes during protein biosynthesis. {ECO:0000255|HAMAP-Rule:MF_00118}.	Escherichia coli O6:K15:H31 (strain 536 / UPEC)	EFTU2_ECOL5	UPI0000110FB2	cytosol [GO:0005829]; GTP binding [GO:0005525]; GTPase activity [GO:0003924]; guanosine tetraphosphate binding [GO:0097216]; translation elongation factor activity [GO:0003746]	GO:0003746; GO:0003924; GO:0005525; GO:0005829; GO:0097216
TRINITY_DN51273_c0_g1_i1	3	2	8.35118e-06	-0.0431448	Downregulated	SA-C vs SA	TSPYA_HUMAN	Probable quinol oxidase subunit 3 (EC 1.10.3.-) (Quinol oxidase polypeptide III)	qoxC SAV1059		aerobic electron transport chain [GO:0019646]; ATP synthesis coupled electron transport [GO:0042773]	plasma membrane [GO:0005886]	cytochrome-c oxidase activity [GO:0004129]		qoxC	1.10.3.-	FUNCTION: Catalyzes quinol oxidation with the concomitant reduction of oxygen to water. {ECO:0000250}.	Staphylococcus aureus (strain Mu50 / ATCC 700699)	QOX3_STAAM	UPI0000054B75	plasma membrane [GO:0005886]; cytochrome-c oxidase activity [GO:0004129]; aerobic electron transport chain [GO:0019646]; ATP synthesis coupled electron transport [GO:0042773]	GO:0004129; GO:0005886; GO:0019646; GO:0042773
TRINITY_DN384_c0_g2_i1	18	49785	4.13716e-127	0.670576	Upregulated	SA-C vs SA	TSAE_SHIFL	HTH-type transcriptional regulator MgrA	mgrA norR SAV0686		response to stress [GO:0006950]	cytoplasm [GO:0005737]	DNA binding [GO:0003677]; DNA-binding transcription factor activity [GO:0003700]		mgrA		FUNCTION: Regulatory protein involved in autolytic activity, multidrug resistance and virulence. {ECO:0000250}.	Staphylococcus aureus (strain Mu50 / ATCC 700699)	MGRA_STAAM	UPI00000548AE	cytoplasm [GO:0005737]; DNA binding [GO:0003677]; DNA-binding transcription factor activity [GO:0003700]; response to stress [GO:0006950]	GO:0003677; GO:0003700; GO:0005737; GO:0006950
TRINITY_DN689_c0_g2_i1	18	15601.8	4.01333e-80	0.571165	Upregulated	SA-C vs SA	TRPO_PSEAE	Immunoglobulin G-binding protein A (IgG-binding protein A) (Staphylococcal protein A) (SpA)	spa SA0107			extracellular region [GO:0005576]	IgG binding [GO:0019864]		spa		FUNCTION: Plays a role in the inhibition of the host innate and adaptive immune responses. Possesses five immunoglobulin-binding domains that capture both the fragment crystallizable region (Fc region) and the Fab region (part of Ig that identifies antigen) of immunoglobulins (By similarity). In turn, Staphylococcus aureus is protected from phagocytic killing via inhibition of Ig Fc region. In ad…	Staphylococcus aureus (strain N315)	SPA_STAAN	UPI00000CABB1	extracellular region [GO:0005576]; IgG binding [GO:0019864]	GO:0005576; GO:0019864
TRINITY_DN45391_c0_g1_i1	1	13480	4.72427e-95	0.806273	Upregulated	SA-C vs SA	TREA_PSEAE	Pyridoxal 5'-phosphate synthase subunit PdxS (PLP synthase subunit PdxS) (EC 4.3.3.6) (Pdx1)	pdxS SAS0476	PATHWAY: Cofactor biosynthesis; pyridoxal 5'-phosphate biosynthesis. {ECO:0000255|HAMAP-Rule:MF_01824}.	amino acid metabolic process [GO:0006520]; pyridoxal phosphate biosynthetic process [GO:0042823]; pyridoxine biosynthetic process [GO:0008615]		pyridoxal 5'-phosphate synthase (glutamine hydrolysing) activity [GO:0036381]		pdxS	4.3.3.6	FUNCTION: Catalyzes the formation of pyridoxal 5'-phosphate from ribose 5-phosphate (RBP), glyceraldehyde 3-phosphate (G3P) and ammonia. The ammonia is provided by the PdxT subunit. Can also use ribulose 5-phosphate and dihydroxyacetone phosphate as substrates, resulting from enzyme-catalyzed isomerization of RBP and G3P, respectively. {ECO:0000255|HAMAP-Rule:MF_01824}.	Staphylococcus aureus (strain MSSA476)	PDXS_STAAS	UPI0000054856	pyridoxal 5'-phosphate synthase (glutamine hydrolysing) activity [GO:0036381]; amino acid metabolic process [GO:0006520]; pyridoxal phosphate biosynthetic process [GO:0042823]; pyridoxine biosynthetic process [GO:0008615]	GO:0006520; GO:0008615; GO:0036381; GO:0042823
TRINITY_DN3238_c0_g1_i2	17	2.25	1.24618e-08	-0.181666	Downregulated	SA-C vs SA	TPX_SALTI	Isocitrate dehydrogenase [NADP] (IDH) (EC 1.1.1.42) (IDP) (NADP(+)-specific ICDH) (Oxalosuccinate decarboxylase)	icd PA14_30190		glyoxylate cycle [GO:0006097]; tricarboxylic acid cycle [GO:0006099]	extracellular region [GO:0005576]	isocitrate dehydrogenase (NADP+) activity [GO:0004450]; magnesium ion binding [GO:0000287]; NAD binding [GO:0051287]		icd	1.1.1.42	FUNCTION: Catalyzes the oxidative decarboxylation of isocitrate to 2-oxoglutarate and carbon dioxide with the concomitant reduction of NADP(+). {ECO:0000250|UniProtKB:P08200}.	Pseudomonas aeruginosa (strain UCBPP-PA14)	IDH_PSEAB	UPI00000C5771	extracellular region [GO:0005576]; isocitrate dehydrogenase (NADP+) activity [GO:0004450]; magnesium ion binding [GO:0000287]; NAD binding [GO:0051287]; glyoxylate cycle [GO:0006097]; tricarboxylic acid cycle [GO:0006099]	GO:0000287; GO:0004450; GO:0005576; GO:0006097; GO:0006099; GO:0051287
TRINITY_DN4933_c0_g1_i1	11	3880	4.03901e-39	0.494137	Upregulated	SA-C vs SA	TPMT_PSEAB	Putative phosphoenolpyruvate synthase regulatory protein (PEP synthase regulatory protein) (PSRP) (EC 2.7.11.33) (EC 2.7.4.28) (Pyruvate, water dikinase regulatory protein)	PA1769				ADP binding [GO:0043531]; ATP binding [GO:0005524]; phosphotransferase activity, phosphate group as acceptor [GO:0016776]; protein serine/threonine kinase activity [GO:0004674]			2.7.11.33; 2.7.4.28	FUNCTION: Bifunctional serine/threonine kinase and phosphorylase involved in the regulation of the phosphoenolpyruvate synthase (PEPS) by catalyzing its phosphorylation/dephosphorylation. {ECO:0000255|HAMAP-Rule:MF_01062}.	Pseudomonas aeruginosa (strain ATCC 15692 / DSM 22644 / CIP 104116 / JCM 14847 / LMG 12228 / 1C / PRS 101 / PAO1)	PSRP_PSEAE	UPI00000C548C	ADP binding [GO:0043531]; ATP binding [GO:0005524]; phosphotransferase activity, phosphate group as acceptor [GO:0016776]; protein serine/threonine kinase activity [GO:0004674]	GO:0004674; GO:0005524; GO:0016776; GO:0043531
TRINITY_DN32_c1_g1_i1	1	2414	8.68489e-40	0.658919	Upregulated	SA-C vs SA	TONB_PSEAE	5-carboxymethyl-2-hydroxymuconate Delta-isomerase (EC 5.3.3.10) (5-carboxymethyl-2-hydroxymuconic acid isomerase) (CHM isomerase) (CHMI)	hpcD	PATHWAY: Aromatic compound metabolism; 4-hydroxyphenylacetate degradation; pyruvate and succinate semialdehyde from 4-hydroxyphenylacetate: step 4/7.	catabolic process [GO:0009056]		5-carboxymethyl-2-hydroxymuconate delta-isomerase activity [GO:0008704]		hpcD	5.3.3.10	FUNCTION: Transforms 5-carboxymethyl-2-hydroxy-muconic acid (CHM) into 5-oxo-pent-3-ene-1,2,5-tricarboxylic acid (OPET).	Escherichia coli	HPCD_ECOLX	UPI000016EE5D	5-carboxymethyl-2-hydroxymuconate delta-isomerase activity [GO:0008704]; catabolic process [GO:0009056]	GO:0008704; GO:0009056
TRINITY_DN3364_c0_g2_i2	2	23013	7.93398e-114	0.792712	Upregulated	SA-C vs SA	TOLR_PSEAE	L-threonine dehydratase biosynthetic IlvA (EC 4.3.1.19) (Threonine deaminase)	ilvA Bmul_0562 BMULJ_02699	PATHWAY: Amino-acid biosynthesis; L-isoleucine biosynthesis; 2-oxobutanoate from L-threonine: step 1/1.	isoleucine biosynthetic process [GO:0009097]; L-serine catabolic process [GO:0006565]; threonine catabolic process [GO:0006567]; threonine metabolic process [GO:0006566]		L-serine ammonia-lyase activity [GO:0003941]; pyridoxal phosphate binding [GO:0030170]; threonine deaminase activity [GO:0004794]		ilvA	4.3.1.19	FUNCTION: Catalyzes the anaerobic formation of alpha-ketobutyrate and ammonia from threonine in a two-step reaction. The first step involved a dehydration of threonine and a production of enamine intermediates (aminocrotonate), which tautomerizes to its imine form (iminobutyrate). Both intermediates are unstable and short-lived. The second step is the nonenzymatic hydrolysis of the enamine/imine …	Burkholderia multivorans (strain ATCC 17616 / 249)	ILVA_BURM1	UPI0000136D46	L-serine ammonia-lyase activity [GO:0003941]; pyridoxal phosphate binding [GO:0030170]; threonine deaminase activity [GO:0004794]; isoleucine biosynthetic process [GO:0009097]; L-serine catabolic process [GO:0006565]; threonine catabolic process [GO:0006567]; threonine metabolic process [GO:0006566]	GO:0003941; GO:0004794; GO:0006565; GO:0006566; GO:0006567; GO:0009097; GO:0030170
TRINITY_DN56_c2_g1_i1	12	908	3.23049e-09	0.362252	Upregulated	SA-C vs SA	TLPQ_PSEAE	16S rRNA (guanine(1405)-N(7))-methyltransferase (EC 2.1.1.179) (16S rRNA m7G1405 methyltransferase)	rmtB		response to antibiotic [GO:0046677]		rRNA methyltransferase activity [GO:0008649]		rmtB	2.1.1.179	FUNCTION: Specifically methylates the N(7) position of guanine 1405 in 16S rRNA (By similarity). Confers resistance to various aminoglycosides, including kanamycin, tobramycin, amikacin, arbekacin, gentamicin, sisomicin and isepamicin. {ECO:0000250, ECO:0000269|PubMed:14742200}.	Serratia marcescens	RMTB_SERMA	UPI00001BBAAC	rRNA methyltransferase activity [GO:0008649]; response to antibiotic [GO:0046677]	GO:0008649; GO:0046677
TRINITY_DN47562_c0_g1_i1	1	1	0.000764908	-0.00840656	Downregulated	SA-C vs SA	TIGD6_HUMAN	Putative peptidyl-prolyl cis-trans isomerase (PPIase) (EC 5.2.1.8) (Rotamase)	SAV0954				RNA polymerase II CTD heptapeptide repeat P3 isomerase activity [GO:0140839]; RNA polymerase II CTD heptapeptide repeat P6 isomerase activity [GO:0140840]			5.2.1.8	FUNCTION: PPIases accelerate the folding of proteins. It catalyzes the cis-trans isomerization of proline imidic peptide bonds in oligopeptides (By similarity). {ECO:0000250}.	Staphylococcus aureus (strain Mu50 / ATCC 700699)	PPI1_STAAM	UPI000005425D	RNA polymerase II CTD heptapeptide repeat P3 isomerase activity [GO:0140839]; RNA polymerase II CTD heptapeptide repeat P6 isomerase activity [GO:0140840]	GO:0140839; GO:0140840
TRINITY_DN3812_c0_g1_i1	33	25	3.93677e-16	-0.0321926	Downregulated	SA-C vs SA	TIG_SALTI	Transcription-repair-coupling factor (TRCF) (EC 3.6.4.-)	mfd HI_1258		regulation of DNA-templated transcription [GO:0006355]; transcription-coupled nucleotide-excision repair, DNA damage recognition [GO:0000716]	cytoplasm [GO:0005737]	ATP binding [GO:0005524]; damaged DNA binding [GO:0003684]; DNA binding [GO:0003677]; DNA translocase activity [GO:0015616]; helicase activity [GO:0004386]; hydrolase activity [GO:0016787]; RNA polymerase core enzyme binding [GO:0043175]		mfd	3.6.4.-	FUNCTION: Couples transcription and DNA repair by recognizing RNA polymerase (RNAP) stalled at DNA lesions. Mediates ATP-dependent release of RNAP and its truncated transcript from the DNA, and recruitment of nucleotide excision repair machinery to the damaged site. {ECO:0000255|HAMAP-Rule:MF_00969}.	Haemophilus influenzae (strain ATCC 51907 / DSM 11121 / KW20 / Rd)	MFD_HAEIN	UPI000012F038	cytoplasm [GO:0005737]; ATP binding [GO:0005524]; damaged DNA binding [GO:0003684]; DNA binding [GO:0003677]; DNA translocase activity [GO:0015616]; helicase activity [GO:0004386]; hydrolase activity [GO:0016787]; RNA polymerase core enzyme binding [GO:0043175]; regulation of DNA-templated transcription [GO:0006355]; transcription-coupled nucleotide-excision repair, DNA damage recognition [GO:000…	GO:0000716; GO:0003677; GO:0003684; GO:0004386; GO:0005524; GO:0005737; GO:0006355; GO:0015616; GO:0016787; GO:0043175
TRINITY_DN8147_c0_g1_i1	2	6415	1.5953e-66	0.683269	Upregulated	SA-C vs SA	THTR_PSEAE	tRNA threonylcarbamoyladenosine biosynthesis protein TsaE (t(6)A37 threonylcarbamoyladenosine biosynthesis protein TsaE)	tsaE yjeE SF4323 S4591		tRNA threonylcarbamoyladenosine modification [GO:0002949]	cytoplasm [GO:0005737]	ATP binding [GO:0005524]; metal ion binding [GO:0046872]		tsaE		FUNCTION: Required for the formation of a threonylcarbamoyl group on adenosine at position 37 (t(6)A37) in tRNAs that read codons beginning with adenine. Is involved in the transfer of the threonylcarbamoyl moiety of threonylcarbamoyl-AMP (TC-AMP) to the N6 group of A37, together with TsaD and TsaB. TsaE seems to play an indirect role in the t(6)A biosynthesis pathway, possibly in regulating the …	Shigella flexneri	TSAE_SHIFL	UPI0000034198	cytoplasm [GO:0005737]; ATP binding [GO:0005524]; metal ion binding [GO:0046872]; tRNA threonylcarbamoyladenosine modification [GO:0002949]	GO:0002949; GO:0005524; GO:0005737; GO:0046872
TRINITY_DN35722_c0_g1_i1	1	325	2.04358e-07	0.487122	Upregulated	SA-C vs SA	THRH_PSEAE	Thymidine kinase (EC 2.7.1.21)	tdk MW2043		DNA biosynthetic process [GO:0071897]; thymidine metabolic process [GO:0046104]	cytosol [GO:0005829]	ATP binding [GO:0005524]; thymidine kinase activity [GO:0004797]; zinc ion binding [GO:0008270]		tdk	2.7.1.21		Staphylococcus aureus (strain MW2)	KITH_STAAW	UPI00000D9F35	cytosol [GO:0005829]; ATP binding [GO:0005524]; thymidine kinase activity [GO:0004797]; zinc ion binding [GO:0008270]; DNA biosynthetic process [GO:0071897]; thymidine metabolic process [GO:0046104]	GO:0004797; GO:0005524; GO:0005829; GO:0008270; GO:0046104; GO:0071897
TRINITY_DN303_c0_g1_i7	1672.06	1	3.96913e-164	-0.64427	Downregulated	SA-C vs SA	THLA_STAA8	General transcription factor II-I repeat domain-containing protein 2A (GTF2I repeat domain-containing protein 2A) (Transcription factor GTF2IRD2-alpha)	GTF2IRD2 GTF2IRD2A			nucleus [GO:0005634]	DNA binding [GO:0003677]; DNA-binding transcription factor activity, RNA polymerase II-specific [GO:0000981]		GTF2IRD2			Homo sapiens (Human)	GTD2A_HUMAN	UPI00033350AC	nucleus [GO:0005634]; DNA binding [GO:0003677]; DNA-binding transcription factor activity, RNA polymerase II-specific [GO:0000981]	GO:0000981; GO:0003677; GO:0005634
TRINITY_DN40951_c0_g1_i1	6	16	1.29729e-09	0.075626	Upregulated	SA-C vs SA	THIO_SALTI	Lipoprotein NlpI	nlpI STY3462 t3199		cell division [GO:0051301]	plasma membrane [GO:0005886]			nlpI		FUNCTION: May be involved in cell division. May play a role in bacterial septation or regulation of cell wall degradation during cell division (By similarity). {ECO:0000250}.	Salmonella typhi	NLPI_SALTI	UPI000005A4ED	plasma membrane [GO:0005886]; cell division [GO:0051301]	GO:0005886; GO:0051301
TRINITY_DN765_c0_g2_i1	1	1788	1.46101e-32	0.633201	Upregulated	SA-C vs SA	THIC_PSEA7	Protein TonB	tonB PA5531		bacterial-type flagellum-dependent swarming motility [GO:0071978]; cellular response to antibiotic [GO:0071236]; iron import into cell [GO:0033212]; protein transport [GO:0015031]; siderophore transport [GO:0015891]; single-species biofilm formation [GO:0044010]; transmembrane transport [GO:0055085]; type IV pilus-dependent motility [GO:0043107]	outer membrane-bounded periplasmic space [GO:0030288]; plasma membrane protein complex [GO:0098797]	energy transducer activity [GO:0031992]		tonB		FUNCTION: Interacts with outer membrane receptor proteins that carry out high-affinity binding and energy dependent uptake into the periplasmic space of specific substrates. It could act to transduce energy from the cytoplasmic membrane to specific energy-requiring processes in the outer membrane, resulting in the release into the periplasm of ligands bound by these outer membrane proteins (By si…	Pseudomonas aeruginosa (strain ATCC 15692 / DSM 22644 / CIP 104116 / JCM 14847 / LMG 12228 / 1C / PRS 101 / PAO1)	TONB_PSEAE	UPI0000137125	outer membrane-bounded periplasmic space [GO:0030288]; plasma membrane protein complex [GO:0098797]; energy transducer activity [GO:0031992]; bacterial-type flagellum-dependent swarming motility [GO:0071978]; cellular response to antibiotic [GO:0071236]; iron import into cell [GO:0033212]; protein transport [GO:0015031]; siderophore transport [GO:0015891]; single-species biofilm formation [GO:004…	GO:0015031; GO:0015891; GO:0030288; GO:0031992; GO:0033212; GO:0043107; GO:0044010; GO:0055085; GO:0071236; GO:0071978; GO:0098797
TRINITY_DN1501_c1_g1_i1	1	447	4.73304e-10	0.51443	Upregulated	SA-C vs SA	TFPB_ACIAD	3-demethoxyubiquinol 3-hydroxylase (DMQ hydroxylase) (EC 1.14.99.60) (2-nonaprenyl-3-methyl-6-methoxy-1,4-benzoquinol hydroxylase)	coq7 PA14_08400	PATHWAY: Cofactor biosynthesis; ubiquinone biosynthesis. {ECO:0000255|HAMAP-Rule:MF_01658}.	ubiquinone biosynthetic process [GO:0006744]	plasma membrane [GO:0005886]	3-demethoxyubiquinol 3-hydroxylase activity [GO:0008682]; metal ion binding [GO:0046872]		coq7	1.14.99.60	FUNCTION: Catalyzes the hydroxylation of 2-nonaprenyl-3-methyl-6-methoxy-1,4-benzoquinol during ubiquinone biosynthesis. {ECO:0000255|HAMAP-Rule:MF_01658}.	Pseudomonas aeruginosa (strain UCBPP-PA14)	COQ7_PSEAB	UPI00000C50E5	plasma membrane [GO:0005886]; 3-demethoxyubiquinol 3-hydroxylase activity [GO:0008682]; metal ion binding [GO:0046872]; ubiquinone biosynthetic process [GO:0006744]	GO:0005886; GO:0006744; GO:0008682; GO:0046872
TRINITY_DN15036_c0_g1_i2	14	17	2.1476e-06	0.00822775	Upregulated	SA-C vs SA	TFKLJ_HUMAN	Periplasmic protein CpxP	cpxP SF3992 S3755			outer membrane-bounded periplasmic space [GO:0030288]	unfolded protein binding [GO:0051082]		cpxP		FUNCTION: Acts as an accessory protein in the Cpx two-component envelope stress response system. Binds the periplasmic domain of sensor histidine kinase CpxA, inhibiting induction of the envelope stress response in the absence of inducer. Aids in combating extracytoplasmic protein-mediated toxicity. {ECO:0000250|UniProtKB:P0AE85}.	Shigella flexneri	CPXP_SHIFL	UPI000012833C	outer membrane-bounded periplasmic space [GO:0030288]; unfolded protein binding [GO:0051082]	GO:0030288; GO:0051082
TRINITY_DN43_c0_g3_i2	55	43225.5	2.54865e-97	0.562776	Upregulated	SA-C vs SA	TERE_ALCSP	Outer membrane porin C (Outer membrane protein C) (Porin OmpC)	ompC STY2493 t0597		monoatomic ion transmembrane transport [GO:0034220]	cell outer membrane [GO:0009279]; pore complex [GO:0046930]	porin activity [GO:0015288]		ompC		FUNCTION: Forms pores that allow passive diffusion of small molecules across the outer membrane. {ECO:0000305}.	Salmonella typhi	OMPC_SALTI	UPI0000059B97	cell outer membrane [GO:0009279]; pore complex [GO:0046930]; porin activity [GO:0015288]; monoatomic ion transmembrane transport [GO:0034220]	GO:0009279; GO:0015288; GO:0034220; GO:0046930
TRINITY_DN612_c0_g4_i1	2335	3	1.09492e-178	-0.578758	Downregulated	SA-C vs SA	TENA_STAAM	Small ribosomal subunit protein uS9 (30S ribosomal protein S9)	rpsI SPA3211		translation [GO:0006412]	cytosolic small ribosomal subunit [GO:0022627]	RNA binding [GO:0003723]; structural constituent of ribosome [GO:0003735]		rpsI			Salmonella paratyphi A (strain ATCC 9150 / SARB42)	RS9_SALPA	UPI000005A527	cytosolic small ribosomal subunit [GO:0022627]; RNA binding [GO:0003723]; structural constituent of ribosome [GO:0003735]; translation [GO:0006412]	GO:0003723; GO:0003735; GO:0006412; GO:0022627
TRINITY_DN1591_c0_g1_i2	47	2	3.16535e-21	-0.278882	Downregulated	SA-C vs SA	TDCB_STAAM	Iron-sulfur cluster assembly protein CyaY	cyaY PA5275		iron-sulfur cluster assembly [GO:0016226]	cytosol [GO:0005829]	ferric iron binding [GO:0008199]; ferrous iron binding [GO:0008198]		cyaY		FUNCTION: Involved in iron-sulfur (Fe-S) cluster assembly. May act as a regulator of Fe-S biogenesis. {ECO:0000255|HAMAP-Rule:MF_00142}.	Pseudomonas aeruginosa (strain ATCC 15692 / DSM 22644 / CIP 104116 / JCM 14847 / LMG 12228 / 1C / PRS 101 / PAO1)	CYAY_PSEAE	UPI00001288A7	cytosol [GO:0005829]; ferric iron binding [GO:0008199]; ferrous iron binding [GO:0008198]; iron-sulfur cluster assembly [GO:0016226]	GO:0005829; GO:0008198; GO:0008199; GO:0016226
TRINITY_DN41611_c0_g1_i1	2	5	4.46613e-276	0.0700966	Upregulated	SA-C vs SA	TBC3K_HUMAN	NADH-ubiquinone oxidoreductase chain 6 (EC 7.1.1.2) (NADH dehydrogenase subunit 6)	MT-ND6 MTND6 NADH6 ND6		aerobic respiration [GO:0009060]; mitochondrial electron transport, NADH to ubiquinone [GO:0006120]; mitochondrial respiratory chain complex I assembly [GO:0032981]; proton motive force-driven mitochondrial ATP synthesis [GO:0042776]; response to cocaine [GO:0042220]; response to hydrogen peroxide [GO:0042542]; response to nicotine [GO:0035094]	mitochondrial inner membrane [GO:0005743]; mitochondrion [GO:0005739]; respiratory chain complex I [GO:0045271]	NADH dehydrogenase (ubiquinone) activity [GO:0008137]		MT-ND6	7.1.1.2	FUNCTION: Core subunit of the mitochondrial membrane respiratory chain NADH dehydrogenase (Complex I) which catalyzes electron transfer from NADH through the respiratory chain, using ubiquinone as an electron acceptor (PubMed:14595656, PubMed:8644732). Essential for the catalytic activity and assembly of complex I (PubMed:14595656, PubMed:8644732). {ECO:0000269|PubMed:14595656, ECO:0000269|PubMed…	Homo sapiens (Human)	NU6M_HUMAN	UPI0000000AA9	mitochondrial inner membrane [GO:0005743]; mitochondrion [GO:0005739]; respiratory chain complex I [GO:0045271]; NADH dehydrogenase (ubiquinone) activity [GO:0008137]; aerobic respiration [GO:0009060]; mitochondrial electron transport, NADH to ubiquinone [GO:0006120]; mitochondrial respiratory chain complex I assembly [GO:0032981]; proton motive force-driven mitochondrial ATP synthesis [GO:004277…	GO:0005739; GO:0005743; GO:0006120; GO:0008137; GO:0009060; GO:0032981; GO:0035094; GO:0042220; GO:0042542; GO:0042776; GO:0045271
TRINITY_DN14212_c0_g1_i1	7	1	1.86676e-61	-0.175122	Downregulated	SA-C vs SA	TBC3E_HUMAN	ATP-dependent Clp protease adapter protein ClpS	clpS PA14_30210		protein catabolic process [GO:0030163]; proteolysis [GO:0006508]				clpS		FUNCTION: Involved in the modulation of the specificity of the ClpAP-mediated ATP-dependent protein degradation. {ECO:0000255|HAMAP-Rule:MF_00302}.	Pseudomonas aeruginosa (strain UCBPP-PA14)	CLPS_PSEAB	UPI000013BE86	protein catabolic process [GO:0030163]; proteolysis [GO:0006508]	GO:0006508; GO:0030163
TRINITY_DN753_c0_g2_i5	2919.24	0.01	2.06348e-188	-1.08655	Downregulated	SA-C vs SA	TARJ2_STAA8	Tigger transposable element-derived protein 6	TIGD6			nucleus [GO:0005634]	DNA binding [GO:0003677]		TIGD6			Homo sapiens (Human)	TIGD6_HUMAN	UPI000006D946	nucleus [GO:0005634]; DNA binding [GO:0003677]	GO:0003677; GO:0005634
TRINITY_DN5777_c0_g1_i3	75.17	3	4.18032e-32	-0.284378	Downregulated	SA-C vs SA	TARD_STAA8	Ribonuclease Y (RNase Y) (EC 3.1.-.-) (Conserved virulence factor A)	rny cvfA SAR1262		mRNA catabolic process [GO:0006402]	plasma membrane [GO:0005886]	RNA binding [GO:0003723]; RNA endonuclease activity [GO:0004521]		rny	3.1.-.-	FUNCTION: Endoribonuclease that initiates mRNA decay. {ECO:0000255|HAMAP-Rule:MF_00335}.	Staphylococcus aureus (strain MRSA252)	RNY_STAAR	UPI00000D765A	plasma membrane [GO:0005886]; RNA binding [GO:0003723]; RNA endonuclease activity [GO:0004521]; mRNA catabolic process [GO:0006402]	GO:0003723; GO:0004521; GO:0005886; GO:0006402
TRINITY_DN45300_c0_g1_i1	1	5223	5.39812e-62	0.725042	Upregulated	SA-C vs SA	TAL_PSEAE	Protocadherin alpha-8 (PCDH-alpha-8)	PCDHA8		cell adhesion [GO:0007155]; homophilic cell adhesion via plasma membrane adhesion molecules [GO:0007156]; nervous system development [GO:0007399]	plasma membrane [GO:0005886]	calcium ion binding [GO:0005509]		PCDHA8		FUNCTION: Potential calcium-dependent cell-adhesion protein. May be involved in the establishment and maintenance of specific neuronal connections in the brain.	Homo sapiens (Human)	PCDA8_HUMAN	UPI00001273D0	plasma membrane [GO:0005886]; calcium ion binding [GO:0005509]; cell adhesion [GO:0007155]; homophilic cell adhesion via plasma membrane adhesion molecules [GO:0007156]; nervous system development [GO:0007399]	GO:0005509; GO:0005886; GO:0007155; GO:0007156; GO:0007399
TRINITY_DN1261_c0_g1_i1	5	5147	9.61976e-55	0.585898	Upregulated	SA-C vs SA	TAL_PSEA8	ATP synthase protein I	atpI PA5561		proton transmembrane transport [GO:1902600]	plasma membrane [GO:0005886]; proton-transporting ATP synthase complex, coupling factor F(o) [GO:0045263]			atpI		FUNCTION: A possible function for this protein is to guide the assembly of the membrane sector of the ATPase enzyme complex. {ECO:0000250}.	Pseudomonas aeruginosa (strain ATCC 15692 / DSM 22644 / CIP 104116 / JCM 14847 / LMG 12228 / 1C / PRS 101 / PAO1)	ATPZ_PSEAE	UPI00000C6073	plasma membrane [GO:0005886]; proton-transporting ATP synthase complex, coupling factor F(o) [GO:0045263]; proton transmembrane transport [GO:1902600]	GO:0005886; GO:0045263; GO:1902600
TRINITY_DN36059_c0_g1_i1	8	4150	3.84373e-44	0.527184	Upregulated	SA-C vs SA	TADA_HAEIN	Inactive signal peptidase IA	spsA SAS0834		signal peptide processing [GO:0006465]	plasma membrane [GO:0005886]	serine-type endopeptidase activity [GO:0004252]		spsA		FUNCTION: Catalytically inactive. {ECO:0000250}.	Staphylococcus aureus (strain MSSA476)	LEPH_STAAS	UPI000012E499	plasma membrane [GO:0005886]; serine-type endopeptidase activity [GO:0004252]; signal peptide processing [GO:0006465]	GO:0004252; GO:0005886; GO:0006465
TRINITY_DN1000_c1_g1_i1	393.45	1	1.76963e-100	-0.52031	Downregulated	SA-C vs SA	SYY_STAAM	DNA-3-methyladenine glycosylase 1 (EC 3.2.2.20) (3-methyladenine-DNA glycosylase I, constitutive) (TAG I) (DNA-3-methyladenine glycosidase I) (DNA-3-methyladenine glycosylase I)	tag b3549 JW3518		base-excision repair [GO:0006284]; DNA alkylation repair [GO:0006307]		DNA-3-methyladenine glycosylase activity [GO:0008725]; metal ion binding [GO:0046872]		tag	3.2.2.20	FUNCTION: Hydrolysis of the deoxyribose N-glycosidic bond to excise 3-methyladenine from the damaged DNA polymer formed by alkylation lesions. {ECO:0000269|PubMed:3536912}.	Escherichia coli (strain K12)	3MG1_ECOLI	UPI0000124EE4	DNA-3-methyladenine glycosylase activity [GO:0008725]; metal ion binding [GO:0046872]; base-excision repair [GO:0006284]; DNA alkylation repair [GO:0006307]	GO:0006284; GO:0006307; GO:0008725; GO:0046872
TRINITY_DN410_c0_g1_i1	17	12	1.29729e-09	-0.0382477	Downregulated	SA-C vs SA	SYT_SALTY	HTH-type transcriptional regulator NorG	norG SAV0108		alpha-amino acid metabolic process [GO:1901605]; biosynthetic process [GO:0009058]		DNA binding [GO:0003677]; DNA-binding transcription factor activity [GO:0003700]; pyridoxal phosphate binding [GO:0030170]; transaminase activity [GO:0008483]		norG		FUNCTION: Positively regulates the expression of the NorB efflux pump and negatively regulates the expression of the AbcA efflux pump. Binds specifically to the promoters of norA, norB and norC and abcA genes. Could also have an aminotransferase activity (By similarity). {ECO:0000250}.	Staphylococcus aureus (strain Mu50 / ATCC 700699)	NORG_STAAM	UPI00000CAA25	DNA binding [GO:0003677]; DNA-binding transcription factor activity [GO:0003700]; pyridoxal phosphate binding [GO:0030170]; transaminase activity [GO:0008483]; alpha-amino acid metabolic process [GO:1901605]; biosynthetic process [GO:0009058]	GO:0003677; GO:0003700; GO:0008483; GO:0009058; GO:0030170; GO:1901605
TRINITY_DN42311_c0_g1_i1	5	3113	1.12794e-39	0.542818	Upregulated	SA-C vs SA	SYL_PSEAE	Dihydrolipoyllysine-residue succinyltransferase component of 2-oxoglutarate dehydrogenase complex (EC 2.3.1.61) (2-oxoglutarate dehydrogenase complex component E2) (OGDC-E2) (Dihydrolipoamide succinyltransferase component of 2-oxoglutarate dehydrogenase complex)	odhB sucB MW1302	PATHWAY: Amino-acid degradation; L-lysine degradation via saccharopine pathway; glutaryl-CoA from L-lysine: step 6/6.	L-lysine catabolic process to acetyl-CoA via saccharopine [GO:0033512]; tricarboxylic acid cycle [GO:0006099]	cytosol [GO:0005829]; oxoglutarate dehydrogenase complex [GO:0045252]	dihydrolipoyllysine-residue succinyltransferase activity [GO:0004149]		odhB	2.3.1.61	FUNCTION: E2 component of the 2-oxoglutarate dehydrogenase (OGDH) complex which catalyzes the second step in the conversion of 2-oxoglutarate to succinyl-CoA and CO(2). {ECO:0000250|UniProtKB:P0AFG6}.	Staphylococcus aureus (strain MW2)	ODO2_STAAW	UPI0000054A67	cytosol [GO:0005829]; oxoglutarate dehydrogenase complex [GO:0045252]; dihydrolipoyllysine-residue succinyltransferase activity [GO:0004149]; L-lysine catabolic process to acetyl-CoA via saccharopine [GO:0033512]; tricarboxylic acid cycle [GO:0006099]	GO:0004149; GO:0005829; GO:0006099; GO:0033512; GO:0045252
TRINITY_DN420_c0_g2_i4	1094.47	1	1.37666e-145	-0.607962	Downregulated	SA-C vs SA	SYFA_STAAC	Olfactory receptor 11H2 (Olfactory receptor OR14-1)	OR11H2 C14orf15 OR11H2P			plasma membrane [GO:0005886]	G protein-coupled receptor activity [GO:0004930]; olfactory receptor activity [GO:0004984]		OR11H2		FUNCTION: Odorant receptor. {ECO:0000305}.	Homo sapiens (Human)	O11H2_HUMAN	UPI0000061EAC	plasma membrane [GO:0005886]; G protein-coupled receptor activity [GO:0004930]; olfactory receptor activity [GO:0004984]	GO:0004930; GO:0004984; GO:0005886
TRINITY_DN1044_c0_g1_i5	159511	278	0	-0.552635	Downregulated	SA-C vs SA	SYD_STAHJ	Alkyl hydroperoxide reductase C (EC 1.11.1.26) (26 kDa antigen) (Peroxiredoxin) (Thioredoxin peroxidase)	ahpC tsaA jhp_1471		cell redox homeostasis [GO:0045454]; cellular response to stress [GO:0033554]; hydrogen peroxide catabolic process [GO:0042744]; response to oxidative stress [GO:0006979]	cytosol [GO:0005829]	NADH-dependent peroxiredoxin activity [GO:0102039]; thioredoxin peroxidase activity [GO:0008379]		ahpC	1.11.1.26	FUNCTION: Thiol-specific peroxidase that catalyzes the reduction of hydrogen peroxide and organic hydroperoxides to water and alcohols, respectively. Plays a role in cell protection against oxidative stress by detoxifying peroxides. {ECO:0000250|UniProtKB:P0A251}.	Helicobacter pylori (strain J99 / ATCC 700824) (Campylobacter pylori J99)	AHPC_HELPJ	UPI0000137734	cytosol [GO:0005829]; NADH-dependent peroxiredoxin activity [GO:0102039]; thioredoxin peroxidase activity [GO:0008379]; cell redox homeostasis [GO:0045454]; cellular response to stress [GO:0033554]; hydrogen peroxide catabolic process [GO:0042744]; response to oxidative stress [GO:0006979]	GO:0005829; GO:0006979; GO:0008379; GO:0033554; GO:0042744; GO:0045454; GO:0102039
TRINITY_DN635_c0_g1_i1	115	29136	4.72187e-61	0.465787	Upregulated	SA-C vs SA	SULA_PSEAE	Histidine protein kinase SaeS (EC 2.7.13.3) (Sensor protein SaeS) (Staphylococcus exoprotein expression protein S)	saeS SAV0705		cellular response to phosphate starvation [GO:0016036]	plasma membrane [GO:0005886]	ATP binding [GO:0005524]; phosphoprotein phosphatase activity [GO:0004721]; phosphorelay sensor kinase activity [GO:0000155]		saeS	2.7.13.3	FUNCTION: Member of the two-component regulatory system SaeR/SaeS involved in the regulation of staphylococcal virulence factors in a strain-dependent fashion. Probably functions as a membrane-associated protein kinase that upon sensing the appropriate signal, autophosphorylates and in turn activates the cytosolic response regulator SaeR (By similarity). {ECO:0000250}.	Staphylococcus aureus (strain Mu50 / ATCC 700699)	SAES_STAAM	UPI00000D7882	plasma membrane [GO:0005886]; ATP binding [GO:0005524]; phosphoprotein phosphatase activity [GO:0004721]; phosphorelay sensor kinase activity [GO:0000155]; cellular response to phosphate starvation [GO:0016036]	GO:0000155; GO:0004721; GO:0005524; GO:0005886; GO:0016036
TRINITY_DN1990_c0_g1_i7	2.87978e+06	6128	0	-0.53553	Downregulated	SA-C vs SA	SSRP_STAAN	Elongation factor Tu (EF-Tu)	tuf SAR0553			cytosol [GO:0005829]	GTP binding [GO:0005525]; GTPase activity [GO:0003924]; translation elongation factor activity [GO:0003746]		tuf		FUNCTION: This protein promotes the GTP-dependent binding of aminoacyl-tRNA to the A-site of ribosomes during protein biosynthesis. {ECO:0000255|HAMAP-Rule:MF_00118}.	Staphylococcus aureus (strain MRSA252)	EFTU_STAAR	UPI0000054837	cytosol [GO:0005829]; GTP binding [GO:0005525]; GTPase activity [GO:0003924]; translation elongation factor activity [GO:0003746]	GO:0003746; GO:0003924; GO:0005525; GO:0005829
TRINITY_DN1001_c0_g1_i1	6420.16	2	1.06451e-222	-0.700151	Downregulated	SA-C vs SA	SPX_STAAR	Aminoglycoside N(3)-acetyltransferase III (EC 2.3.1.81) (AAC(3)-IIIa) (ACC(3)-III) (Aminocyclitol 3-N-acetyltransferase type III) (Aminoglycoside acetyltransferase (3)-IIIa) (Gentamicin-(3)-N-acetyl-transferase)	aacC3		2-deoxystreptamine metabolic process [GO:1901742]; acetyl-CoA catabolic process [GO:0046356]; antibiotic metabolic process [GO:0016999]; cellular response to antibiotic [GO:0071236]		aminoglycoside 3-N-acetyltransferase activity [GO:0046353]; coenzyme A binding [GO:0120225]; identical protein binding [GO:0042802]; protein homodimerization activity [GO:0042803]		aacC3	2.3.1.81	FUNCTION: Resistance to antibiotics containing the 2-deoxy-streptamine ring including dibekacin, gentamicin, kanamycin, sisomicin, tobramycin and neomycin, but not to amikacin or netilmicin (PubMed:1649572). Acetylates a broad range of both 4,5- and 4,6-disubstituted aminoglycosides, including neomycin, paromomycin, ribostamycin, sisomicin, gentamicin, tobramycin and kanamycin, with no preference…	Pseudomonas aeruginosa	AACC3_PSEAI	UPI000012508F	aminoglycoside 3-N-acetyltransferase activity [GO:0046353]; coenzyme A binding [GO:0120225]; identical protein binding [GO:0042802]; protein homodimerization activity [GO:0042803]; 2-deoxystreptamine metabolic process [GO:1901742]; acetyl-CoA catabolic process [GO:0046356]; antibiotic metabolic process [GO:0016999]; cellular response to antibiotic [GO:0071236]	GO:0016999; GO:0042802; GO:0042803; GO:0046353; GO:0046356; GO:0071236; GO:0120225; GO:1901742
TRINITY_DN22_c0_g1_i3	10	7774.43	1.78792e-62	0.561847	Upregulated	SA-C vs SA	SPUE_PSEAE	Formate dehydrogenase, nitrate-inducible, major subunit (EC 1.17.5.3) (Anaerobic formate dehydrogenase major subunit) (Formate dehydrogenase-N subunit alpha) (FDH-N subunit alpha)	fdnG b1474 JW1470		anaerobic electron transport chain [GO:0019645]; anaerobic respiration [GO:0009061]; formate oxidation [GO:0015944]; heme oxidation [GO:0006788]	formate dehydrogenase complex [GO:0009326]; membrane [GO:0016020]; outer membrane-bounded periplasmic space [GO:0030288]	4 iron, 4 sulfur cluster binding [GO:0051539]; electron transfer activity [GO:0009055]; formate dehydrogenase (cytochrome-c-553) activity [GO:0047111]; formate dehydrogenase (NAD+) activity [GO:0008863]; formate dehydrogenase (quinone) activity [GO:0036397]; molybdenum ion binding [GO:0030151]; molybdopterin cofactor binding [GO:0043546]; selenium binding [GO:0008430]		fdnG	1.17.5.3	FUNCTION: Formate dehydrogenase allows E.coli to use formate as major electron donor during anaerobic respiration, when nitrate is used as electron acceptor. The alpha subunit FdnG contains the formate oxidation site. Electrons are transferred from formate to menaquinone in the gamma subunit (FdnI), through the 4Fe-4S clusters in the beta subunit (FdnH). Formate dehydrogenase-N is part of a syste…	Escherichia coli (strain K12)	FDNG_ECOLI	UPI00001680A9	formate dehydrogenase complex [GO:0009326]; membrane [GO:0016020]; outer membrane-bounded periplasmic space [GO:0030288]; 4 iron, 4 sulfur cluster binding [GO:0051539]; electron transfer activity [GO:0009055]; formate dehydrogenase (cytochrome-c-553) activity [GO:0047111]; formate dehydrogenase (NAD+) activity [GO:0008863]; formate dehydrogenase (quinone) activity [GO:0036397]; molybdenum ion bin…	GO:0006788; GO:0008430; GO:0008863; GO:0009055; GO:0009061; GO:0009326; GO:0015944; GO:0016020; GO:0019645; GO:0030151; GO:0030288; GO:0036397; GO:0043546; GO:0047111; GO:0051539
TRINITY_DN877_c0_g1_i11	672	1	3.33686e-124	-0.566173	Downregulated	SA-C vs SA	SPA_STAAN	Uncharacterized protein sll0335	sll0335									Synechocystis sp. (strain ATCC 27184 / PCC 6803 / Kazusa)	Y335_SYNY3	UPI0000139643
TRINITY_DN2546_c0_g1_i12	12211	2.2	1.21109e-250	-0.747065	Downregulated	SA-C vs SA	SODM2_STAAR	Formamidopyrimidine-DNA glycosylase (Fapy-DNA glycosylase) (EC 3.2.2.23) (DNA-(apurinic or apyrimidinic site) lyase MutM) (AP lyase MutM) (EC 4.2.99.18)	mutM fpg PA14_04670		base-excision repair [GO:0006284]		8-oxo-7,8-dihydroguanine DNA N-glycosylase activity [GO:0034039]; class I DNA-(apurinic or apyrimidinic site) endonuclease activity [GO:0140078]; damaged DNA binding [GO:0003684]; zinc ion binding [GO:0008270]		mutM	3.2.2.23; 4.2.99.18	FUNCTION: Involved in base excision repair of DNA damaged by oxidation or by mutagenic agents. Acts as a DNA glycosylase that recognizes and removes damaged bases. Has a preference for oxidized purines, such as 7,8-dihydro-8-oxoguanine (8-oxoG). Has AP (apurinic/apyrimidinic) lyase activity and introduces nicks in the DNA strand. Cleaves the DNA backbone by beta-delta elimination to generate a si…	Pseudomonas aeruginosa (strain UCBPP-PA14)	FPG_PSEAB	UPI000012AB94	8-oxo-7,8-dihydroguanine DNA N-glycosylase activity [GO:0034039]; class I DNA-(apurinic or apyrimidinic site) endonuclease activity [GO:0140078]; damaged DNA binding [GO:0003684]; zinc ion binding [GO:0008270]; base-excision repair [GO:0006284]	GO:0003684; GO:0006284; GO:0008270; GO:0034039; GO:0140078
TRINITY_DN4605_c1_g2_i2	47.62	0.44	3.16535e-21	-0.409728	Downregulated	SA-C vs SA	SODM1_STAAR	Low-affinity inorganic phosphate transporter PitA	pitA Z4893 ECs4365		phosphate ion transmembrane transport [GO:0035435]	plasma membrane [GO:0005886]	phosphate transmembrane transporter activity [GO:0005315]; symporter activity [GO:0015293]		pitA		FUNCTION: Low-affinity inorganic phosphate transporter. {ECO:0000250|UniProtKB:P0AFJ7}.	Escherichia coli O157:H7	PITA_ECO57	UPI0000131B2A	plasma membrane [GO:0005886]; phosphate transmembrane transporter activity [GO:0005315]; symporter activity [GO:0015293]; phosphate ion transmembrane transport [GO:0035435]	GO:0005315; GO:0005886; GO:0015293; GO:0035435
TRINITY_DN5478_c0_g4_i1	2	4	1.83097e-72	0.0509788	Upregulated	SA-C vs SA	SODF_SALTI	Large ribosomal subunit protein bL19 (50S ribosomal protein L19)	rplS PA3742		translation [GO:0006412]	cytosolic large ribosomal subunit [GO:0022625]	structural constituent of ribosome [GO:0003735]		rplS		FUNCTION: This protein is located at the 30S-50S ribosomal subunit interface and may play a role in the structure and function of the aminoacyl-tRNA binding site. {ECO:0000255|HAMAP-Rule:MF_00402}.	Pseudomonas aeruginosa (strain ATCC 15692 / DSM 22644 / CIP 104116 / JCM 14847 / LMG 12228 / 1C / PRS 101 / PAO1)	RL19_PSEAE	UPI0000133CB9	cytosolic large ribosomal subunit [GO:0022625]; structural constituent of ribosome [GO:0003735]; translation [GO:0006412]	GO:0003735; GO:0006412; GO:0022625
TRINITY_DN50_c0_g1_i7	15530.6	27	4.2499e-261	-0.552848	Downregulated	SA-C vs SA	SNAA_BACSU	Phosphoenolpyruvate-protein phosphotransferase (EC 2.7.3.9) (Phosphotransferase system, enzyme I)	ptsI MW0966		phosphoenolpyruvate-dependent sugar phosphotransferase system [GO:0009401]	cytoplasm [GO:0005737]	kinase activity [GO:0016301]; metal ion binding [GO:0046872]; phosphoenolpyruvate-protein phosphotransferase activity [GO:0008965]		ptsI	2.7.3.9	FUNCTION: General (non sugar-specific) component of the phosphoenolpyruvate-dependent sugar phosphotransferase system (sugar PTS). This major carbohydrate active-transport system catalyzes the phosphorylation of incoming sugar substrates concomitantly with their translocation across the cell membrane. Enzyme I transfers the phosphoryl group from phosphoenolpyruvate (PEP) to the phosphoryl carrier…	Staphylococcus aureus (strain MW2)	PT1_STAAW	UPI00000D9D6E	cytoplasm [GO:0005737]; kinase activity [GO:0016301]; metal ion binding [GO:0046872]; phosphoenolpyruvate-protein phosphotransferase activity [GO:0008965]; phosphoenolpyruvate-dependent sugar phosphotransferase system [GO:0009401]	GO:0005737; GO:0008965; GO:0009401; GO:0016301; GO:0046872
TRINITY_DN2895_c0_g1_i2	1	3	9.18169e-13	0.085717	Upregulated	SA-C vs SA	SKP_SALPA	Proton/sodium-glutamate symport protein (Glutamate-aspartate carrier protein)	gltT		dicarboxylic acid transport [GO:0006835]	plasma membrane [GO:0005886]	symporter activity [GO:0015293]		gltT		FUNCTION: This carrier protein is part of the Na(+)-dependent, binding-protein-independent glutamate-aspartate transport system. {ECO:0000269|PubMed:8596452, ECO:0000269|PubMed:8634258}.	Geobacillus stearothermophilus (Bacillus stearothermophilus)	GLTT_GEOSE	UPI000012B818	plasma membrane [GO:0005886]; symporter activity [GO:0015293]; dicarboxylic acid transport [GO:0006835]	GO:0005886; GO:0006835; GO:0015293
TRINITY_DN2638_c0_g1_i1	23	5598	1.40087e-40	0.462349	Upregulated	SA-C vs SA	SERA_HAEIN	Glycine cleavage system H protein 2	gcvH2 PA5214		glycine decarboxylation via glycine cleavage system [GO:0019464]	cytosol [GO:0005829]; glycine cleavage complex [GO:0005960]			gcvH2		FUNCTION: The glycine cleavage system catalyzes the degradation of glycine. The H protein shuttles the methylamine group of glycine from the P protein to the T protein. {ECO:0000255|HAMAP-Rule:MF_00272}.	Pseudomonas aeruginosa (strain ATCC 15692 / DSM 22644 / CIP 104116 / JCM 14847 / LMG 12228 / 1C / PRS 101 / PAO1)	GCSH2_PSEAE	UPI000012B30E	cytosol [GO:0005829]; glycine cleavage complex [GO:0005960]; glycine decarboxylation via glycine cleavage system [GO:0019464]	GO:0005829; GO:0005960; GO:0019464
TRINITY_DN95_c0_g3_i1	1	7791	3.18818e-75	0.759303	Upregulated	SA-C vs SA	SDHD_PSEAB	Inner membrane protein YbhN	ybhN b0788 JW0771			plasma membrane [GO:0005886]			ybhN			Escherichia coli (strain K12)	YBHN_ECOLI	UPI000013A35A	plasma membrane [GO:0005886]	GO:0005886
TRINITY_DN1004_c0_g3_i1	21	47997	5.83444e-123	0.654235	Upregulated	SA-C vs SA	SDHB_ECOLI	Aconitate hydratase A (ACN) (Aconitase) (EC 4.2.1.3) ((2R,3S)-2-methylisocitrate dehydratase) ((2S,3R)-3-hydroxybutane-1,2,3-tricarboxylate dehydratase) (Iron-responsive protein-like) (IRP-like) (Probable 2-methyl-cis-aconitate hydratase) (EC 4.2.1.99) (RNA-binding protein)	acnA PA1562	PATHWAY: Carbohydrate metabolism; tricarboxylic acid cycle; isocitrate from oxaloacetate: step 2/2. {ECO:0000250|UniProtKB:Q8ZP52}.; PATHWAY: Organic acid metabolism; propanoate degradation. {ECO:0000250|UniProtKB:Q8ZP52}.	anaerobic respiration [GO:0009061]; citrate metabolic process [GO:0006101]; propionate metabolic process, methylcitrate cycle [GO:0019679]; response to oxidative stress [GO:0006979]; tricarboxylic acid cycle [GO:0006099]	cytoplasm [GO:0005737]; cytosol [GO:0005829]	2-methylisocitrate dehydratase activity [GO:0047456]; 4 iron, 4 sulfur cluster binding [GO:0051539]; aconitate hydratase activity [GO:0003994]; iron ion binding [GO:0005506]; iron-responsive element binding [GO:0030350]; mRNA 3'-UTR binding [GO:0003730]; mRNA binding [GO:0003729]		acnA	4.2.1.3; 4.2.1.99	FUNCTION: Involved in the catabolism of short chain fatty acids (SCFA) via the tricarboxylic acid (TCA)(acetyl degradation route) and probably the 2-methylcitrate cycle I (propionate degradation route). Catalyzes the reversible isomerization of citrate to isocitrate via cis-aconitate. Could catalyze the hydration of 2-methyl-cis-aconitate to yield (2R,3S)-2-methylisocitrate. The apo form of AcnA …	Pseudomonas aeruginosa (strain ATCC 15692 / DSM 22644 / CIP 104116 / JCM 14847 / LMG 12228 / 1C / PRS 101 / PAO1)	ACNA_PSEAE	UPI00000C53E0	cytoplasm [GO:0005737]; cytosol [GO:0005829]; 2-methylisocitrate dehydratase activity [GO:0047456]; 4 iron, 4 sulfur cluster binding [GO:0051539]; aconitate hydratase activity [GO:0003994]; iron ion binding [GO:0005506]; iron-responsive element binding [GO:0030350]; mRNA 3'-UTR binding [GO:0003730]; mRNA binding [GO:0003729]; anaerobic respiration [GO:0009061]; citrate metabolic process [GO:00061…	GO:0003729; GO:0003730; GO:0003994; GO:0005506; GO:0005737; GO:0005829; GO:0006099; GO:0006101; GO:0006979; GO:0009061; GO:0019679; GO:0030350; GO:0047456; GO:0051539
TRINITY_DN1004_c1_g1_i1	14	2634	1.24982e-26	0.440291	Upregulated	SA-C vs SA	SDHA_SCHPO	Acetoin utilization protein AcuA (EC 2.3.1.-) (Acetoin dehydrogenase) (Protein acetyltransferase AcuA)	acuA BL00376 BLi03120	PATHWAY: Ketone degradation; acetoin degradation. {ECO:0000250|UniProtKB:P39065}.	acetoin catabolic process [GO:0045150]; butanediol catabolic process [GO:0034078]; cellular response to glucose starvation [GO:0042149]; cellular response to nutrient levels [GO:0031669]		acetoin dehydrogenase (NAD+) activity [GO:0019152]; acetyl-CoA synthetase acetyltransferase activity [GO:0043894]		acuA	2.3.1.-	FUNCTION: Part of the acuABC operon, which is possibly involved in the breakdown of acetoin and butanediol. Acts as an acetyltransferase inactivating acetyl-CoA synthetase AcsA via acetylation at a Lys residue. {ECO:0000250|UniProtKB:P39065, ECO:0000269|PubMed:20524112}.	Bacillus licheniformis (strain ATCC 14580 / DSM 13 / JCM 2505 / CCUG 7422 / NBRC 12200 / NCIMB 9375 / NCTC 10341 / NRRL NRS-1264 / Gibson 46)	ACUA_BACLD	UPI000043D9F2	acetoin dehydrogenase (NAD+) activity [GO:0019152]; acetyl-CoA synthetase acetyltransferase activity [GO:0043894]; acetoin catabolic process [GO:0045150]; butanediol catabolic process [GO:0034078]; cellular response to glucose starvation [GO:0042149]; cellular response to nutrient levels [GO:0031669]	GO:0019152; GO:0031669; GO:0034078; GO:0042149; GO:0043894; GO:0045150
TRINITY_DN141_c1_g1_i1	18	15936	5.93843e-81	0.572981	Upregulated	SA-C vs SA	SCOA_BACSU	Holin-like protein CidA	cidA SAS2427		cytolysis [GO:0019835]; killing of cells of another organism [GO:0031640]; programmed cell death [GO:0012501]	plasma membrane [GO:0005886]			cidA		FUNCTION: Increases the activity of extracellular murein hydrolases possibly by mediating their export via hole formation. Inhibited by the antiholin-like proteins LrgAB. In an unstressed cell, the LrgAB products probably inhibit the function of the CidAB proteins. When a cell is stressed by the addition of antibiotics or by other factors in the environment, the CidAB proteins possibly oligomeriz…	Staphylococcus aureus (strain MSSA476)	CIDA_STAAS	UPI00000548B4	plasma membrane [GO:0005886]; cytolysis [GO:0019835]; killing of cells of another organism [GO:0031640]; programmed cell death [GO:0012501]	GO:0005886; GO:0012501; GO:0019835; GO:0031640
TRINITY_DN31185_c0_g1_i2	63	1	2.06637e-27	-0.363369	Downregulated	SA-C vs SA	SCAFB_BPPHS	Histidinol-phosphatase (Hol-Pase) (EC 3.1.3.15) (Histidinol-phosphate phosphatase)	PA0335	PATHWAY: Amino-acid biosynthesis; L-histidine biosynthesis; L-histidine from 5-phospho-alpha-D-ribose 1-diphosphate: step 8/9. {ECO:0000305|PubMed:31862725}.	L-histidine biosynthetic process [GO:0000105]		hydrolase activity [GO:0016787]; metal ion binding [GO:0046872]			3.1.3.15	FUNCTION: Catalyzes the dephosphorylation of histidinol-phosphate to histidinol, the direct precursor of histidine. {ECO:0000305|PubMed:31862725}.	Pseudomonas aeruginosa (strain ATCC 15692 / DSM 22644 / CIP 104116 / JCM 14847 / LMG 12228 / 1C / PRS 101 / PAO1)	HIS9_PSEAE	UPI00000C5012	hydrolase activity [GO:0016787]; metal ion binding [GO:0046872]; L-histidine biosynthetic process [GO:0000105]	GO:0000105; GO:0016787; GO:0046872
TRINITY_DN643_c0_g1_i6	2170.73	6	1.60506e-175	-0.513123	Downregulated	SA-C vs SA	SBNE_STAA8	Probable succinyl-CoA:3-ketoacid coenzyme A transferase subunit A (EC 2.8.3.5) (Succinyl-CoA:3-oxoacid CoA-transferase) (OXCT A)	scoA yxjD BSU38990 N15K				succinyl-CoA:3-oxo-acid CoA-transferase activity [GO:0008260]	N15K	scoA	2.8.3.5		Bacillus subtilis (strain 168)	SCOA_BACSU	UPI0000060C79	succinyl-CoA:3-oxo-acid CoA-transferase activity [GO:0008260]	GO:0008260
TRINITY_DN2777_c0_g1_i3	655.01	1	4.48089e-123	-0.563979	Downregulated	SA-C vs SA	SBNC_STAA8	Hydroxyacylglutathione hydrolase (EC 3.1.2.6) (Glyoxalase II) (Glx II)	gloB PA1813	PATHWAY: Secondary metabolite metabolism; methylglyoxal degradation; (R)-lactate from methylglyoxal: step 2/2. {ECO:0000255|HAMAP-Rule:MF_01374}.	methylglyoxal catabolic process to D-lactate via S-lactoyl-glutathione [GO:0019243]		hydroxyacylglutathione hydrolase activity [GO:0004416]; metal ion binding [GO:0046872]		gloB	3.1.2.6	FUNCTION: Thiolesterase that catalyzes the hydrolysis of S-D-lactoyl-glutathione to form glutathione and D-lactic acid. {ECO:0000255|HAMAP-Rule:MF_01374}.	Pseudomonas aeruginosa (strain ATCC 15692 / DSM 22644 / CIP 104116 / JCM 14847 / LMG 12228 / 1C / PRS 101 / PAO1)	GLO2_PSEAE	UPI00000C54AC	hydroxyacylglutathione hydrolase activity [GO:0004416]; metal ion binding [GO:0046872]; methylglyoxal catabolic process to D-lactate via S-lactoyl-glutathione [GO:0019243]	GO:0004416; GO:0019243; GO:0046872
TRINITY_DN443_c0_g5_i2	15	3551.83	2.88421e-33	0.459993	Upregulated	SA-C vs SA	SBCC_PSEAE	Pyrrole-2-carboxylic acid decarboxylase (P2C decarboxylase) (EC 4.1.1.93) (Ferulic acid decarboxylase-like protein) (Homologous to UbiD protein A) (UbiD-like decarboxylase)	hudA PA0254		catabolic process [GO:0009056]; ubiquinone biosynthetic process [GO:0006744]	cytoplasm [GO:0005737]; cytosol [GO:0005829]	3-octaprenyl-4-hydroxybenzoate carboxy-lyase activity [GO:0008694]; metal ion binding [GO:0046872]		hudA	4.1.1.93	FUNCTION: Catalyzes the prenyl-FMN-dependent decarboxylation of pyrrole-2-carboxylate (P2C) (PubMed:33763291). Can also catalyze the carboxylation of pyrrole in the presence of elevated concentrations of CO(2) or bicarbonate (PubMed:33763291). Can accept a modest range of heteroaromatic compounds such as 3-methylpyrrole-2-carboxylate, indole-3-carboxylate and furan-2-carboxylate, and shows very l…	Pseudomonas aeruginosa (strain ATCC 15692 / DSM 22644 / CIP 104116 / JCM 14847 / LMG 12228 / 1C / PRS 101 / PAO1)	P2CDC_PSEAE	UPI00000C4FC3	cytoplasm [GO:0005737]; cytosol [GO:0005829]; 3-octaprenyl-4-hydroxybenzoate carboxy-lyase activity [GO:0008694]; metal ion binding [GO:0046872]; catabolic process [GO:0009056]; ubiquinone biosynthetic process [GO:0006744]	GO:0005737; GO:0005829; GO:0006744; GO:0008694; GO:0009056; GO:0046872
TRINITY_DN2344_c0_g3_i1	1635	2	3.79967e-163	-0.582964	Downregulated	SA-C vs SA	SARX_STAAM	Probable FKBP-type 16 kDa peptidyl-prolyl cis-trans isomerase (PPIase) (EC 5.2.1.8) (Rotamase)	yaaD		protein folding [GO:0006457]		RNA polymerase II CTD heptapeptide repeat P3 isomerase activity [GO:0140839]; RNA polymerase II CTD heptapeptide repeat P6 isomerase activity [GO:0140840]		yaaD	5.2.1.8	FUNCTION: PPIases accelerate the folding of proteins.	Pseudomonas fluorescens	FKBX_PSEFL	UPI000012A831	RNA polymerase II CTD heptapeptide repeat P3 isomerase activity [GO:0140839]; RNA polymerase II CTD heptapeptide repeat P6 isomerase activity [GO:0140840]; protein folding [GO:0006457]	GO:0006457; GO:0140839; GO:0140840
TRINITY_DN70_c0_g4_i1	11	9076	1.19548e-66	0.566943	Upregulated	SA-C vs SA	SAHH_PSEA8	Aspartate--tRNA ligase (EC 6.1.1.12) (Aspartyl-tRNA synthetase) (AspRS)	aspS SH1291		aspartyl-tRNA aminoacylation [GO:0006422]	cytoplasm [GO:0005737]	aspartate-tRNA ligase activity [GO:0004815]; ATP binding [GO:0005524]; nucleic acid binding [GO:0003676]; transferase activity [GO:0016740]		aspS	6.1.1.12	FUNCTION: Catalyzes the attachment of L-aspartate to tRNA(Asp) in a two-step reaction: L-aspartate is first activated by ATP to form Asp-AMP and then transferred to the acceptor end of tRNA(Asp). {ECO:0000255|HAMAP-Rule:MF_00044}.	Staphylococcus haemolyticus (strain JCSC1435)	SYD_STAHJ	UPI000054BA85	cytoplasm [GO:0005737]; aspartate-tRNA ligase activity [GO:0004815]; ATP binding [GO:0005524]; nucleic acid binding [GO:0003676]; transferase activity [GO:0016740]; aspartyl-tRNA aminoacylation [GO:0006422]	GO:0003676; GO:0004815; GO:0005524; GO:0005737; GO:0006422; GO:0016740
TRINITY_DN40236_c0_g1_i1	16	1	3.94049e-08	-0.245948	Downregulated	SA-C vs SA	SAHH_CHESB	Probable malate:quinone oxidoreductase 2 (EC 1.1.5.4) (MQO 2) (Malate dehydrogenase [quinone] 2)	mqo2 MW2526	PATHWAY: Carbohydrate metabolism; tricarboxylic acid cycle; oxaloacetate from (S)-malate (quinone route): step 1/1. {ECO:0000255|HAMAP-Rule:MF_00212}.	tricarboxylic acid cycle [GO:0006099]		2-hydroxyglutarate dehydrogenase activity [GO:0047545]; L-malate dehydrogenase (quinone) activity [GO:0008924]		mqo2	1.1.5.4		Staphylococcus aureus (strain MW2)	MQO2_STAAW	UPI000012F4C2	2-hydroxyglutarate dehydrogenase activity [GO:0047545]; L-malate dehydrogenase (quinone) activity [GO:0008924]; tricarboxylic acid cycle [GO:0006099]	GO:0006099; GO:0008924; GO:0047545
TRINITY_DN712_c1_g3_i1	1342	2	1.58628e-154	-0.566045	Downregulated	SA-C vs SA	SAES_STAAM	Glycerol-3-phosphate cytidylyltransferase (GCT) (GCTase) (Gro-PCT) (EC 2.7.7.39) (CDP-glycerol pyrophosphorylase)	tarD SAOUHSC_00645	PATHWAY: Cell wall biogenesis; poly(ribitol phosphate) teichoic acid biosynthesis. {ECO:0000305|PubMed:12637027}.	cell wall organization [GO:0071555]; teichoic acid biosynthetic process [GO:0019350]	cytoplasm [GO:0005737]	glycerol-3-phosphate cytidylyltransferase activity [GO:0047348]; metal ion binding [GO:0046872]		tarD	2.7.7.39	FUNCTION: Catalyzes the transfer of the cytidylyl group of CTP to sn-glycerol 3-phosphate so the activated glycerol 3-phosphate can be used for teichoic acid synthesis, via incorporation into both the linkage unit by TarB and TarF. {ECO:0000269|PubMed:12637027}.	Staphylococcus aureus (strain NCTC 8325 / PS 47)	TARD_STAA8	UPI00000547C8	cytoplasm [GO:0005737]; glycerol-3-phosphate cytidylyltransferase activity [GO:0047348]; metal ion binding [GO:0046872]; cell wall organization [GO:0071555]; teichoic acid biosynthetic process [GO:0019350]	GO:0005737; GO:0019350; GO:0046872; GO:0047348; GO:0071555
TRINITY_DN1262_c0_g8_i1	781	5837476	7.7803e-212	0.755749	Upregulated	SA-C vs SA	RSMI_PSEAE	Outer membrane protein assembly factor BamA	bamA yaeT SG0228		Gram-negative-bacterium-type cell outer membrane assembly [GO:0043165]; protein insertion into membrane [GO:0051205]	Bam protein complex [GO:1990063]			bamA		FUNCTION: Part of the outer membrane protein assembly complex, which is involved in assembly and insertion of beta-barrel proteins into the outer membrane. Constitutes, with BamD, the core component of the assembly machinery. {ECO:0000255|HAMAP-Rule:MF_01430}.	Salmonella gallinarum (strain 287/91 / NCTC 13346)	BAMA_SALG2	UPI000169EE8F	Bam protein complex [GO:1990063]; Gram-negative-bacterium-type cell outer membrane assembly [GO:0043165]; protein insertion into membrane [GO:0051205]	GO:0043165; GO:0051205; GO:1990063
TRINITY_DN40613_c0_g1_i1	3	2323	7.49862e-35	0.561504	Upregulated	SA-C vs SA	RSGA_PSEAE	Manganese import system permease protein ScaB (ORF1)			response to zinc ion [GO:0010043]; transmembrane transport [GO:0055085]	ATP-binding cassette (ABC) transporter complex [GO:0043190]					FUNCTION: Part of an ABC transporter complex involved in manganese import. {ECO:0000250|UniProtKB:P42361, ECO:0000305|PubMed:7596287}.	Streptococcus parasanguinis	MTSB_STRPA	UPI0000130FB6	ATP-binding cassette (ABC) transporter complex [GO:0043190]; response to zinc ion [GO:0010043]; transmembrane transport [GO:0055085]	GO:0010043; GO:0043190; GO:0055085
TRINITY_DN3871_c0_g2_i6	1586.76	5	7.42079e-162	-0.501895	Downregulated	SA-C vs SA	RS9_STAAC	Putative antiporter subunit mnhG2 (Mrp complex subunit G2) (Putative NADH-ubiquinone oxidoreductase subunit mnhF2)	mnhG2 mrpG2 SAV0628			plasma membrane [GO:0005886]	sodium:proton antiporter activity [GO:0015385]		mnhG2			Staphylococcus aureus (strain Mu50 / ATCC 700699)	MNHG2_STAAM	UPI00000CACBB	plasma membrane [GO:0005886]; sodium:proton antiporter activity [GO:0015385]	GO:0005886; GO:0015385
TRINITY_DN344_c0_g1_i3	23	19	1.41877e-11	-0.0247752	Downregulated	SA-C vs SA	RS9_SALPA	Ribosomal silencing factor RsfS	rsfS PA14_12030		cytosolic ribosome assembly [GO:0042256]; negative regulation of ribosome biogenesis [GO:0090071]; negative regulation of translation [GO:0017148]	cytoplasm [GO:0005737]	ribosomal large subunit binding [GO:0043023]		rsfS		FUNCTION: Functions as a ribosomal silencing factor. Interacts with ribosomal protein uL14 (rplN), blocking formation of intersubunit bridge B8. Prevents association of the 30S and 50S ribosomal subunits and the formation of functional ribosomes, thus repressing translation. {ECO:0000255|HAMAP-Rule:MF_01477}.	Pseudomonas aeruginosa (strain UCBPP-PA14)	IOJAP_PSEAB	UPI00000C5BBB	cytoplasm [GO:0005737]; ribosomal large subunit binding [GO:0043023]; cytosolic ribosome assembly [GO:0042256]; negative regulation of ribosome biogenesis [GO:0090071]; negative regulation of translation [GO:0017148]	GO:0005737; GO:0017148; GO:0042256; GO:0043023; GO:0090071
TRINITY_DN1746_c0_g1_i1	64	17912	4.1253e-59	0.474316	Upregulated	SA-C vs SA	RS9_PSEAE	Protein DJ-1 homolog D (AtDJ1D) (Lactoylglutathione lyase DJ1D) (EC 4.4.1.5)	DJ1D At3g02720 F13E7.34			cytosol [GO:0005829]	glyoxalase III activity [GO:0019172]; lactoylglutathione lyase activity [GO:0004462]	F13E7.34	DJ1D	4.4.1.5	FUNCTION: Possesses glyoxalase I activity. Catalyzes the conversion of hemimercaptal, formed from methylglyoxal and glutathione, to S-lactoylglutathione. May be involved in oxidative stress response. {ECO:0000269|PubMed:23651081}.	Arabidopsis thaliana (Mouse-ear cress)	DJ1D_ARATH	UPI00000ABF46	cytosol [GO:0005829]; glyoxalase III activity [GO:0019172]; lactoylglutathione lyase activity [GO:0004462]	GO:0004462; GO:0005829; GO:0019172
TRINITY_DN26241_c0_g1_i1	57	15117	7.40978e-56	0.469705	Upregulated	SA-C vs SA	RS6_PSEAE	Putative DNA ends protecting protein gam (Gene product 10) (gp10)	gam Mup10		DNA protection [GO:0042262]; symbiont-mediated evasion of DNA end degradation by host [GO:0099016]; symbiont-mediated suppression of host innate immune response [GO:0052170]; virus-mediated perturbation of host defense response [GO:0019049]	host cell cytoplasm [GO:0030430]	double-stranded DNA binding [GO:0003690]		gam		FUNCTION: Protects linear double-stranded DNA from host exonuclease degradation. Binds to linear dsDNA irrespective of the precise architecture of the DNA terminus but not to RNA or to ssDNA. {ECO:0000269|PubMed:12524520}.	Escherichia phage Mu (Bacteriophage Mu)	GAM_BPMU	UPI000013863C	host cell cytoplasm [GO:0030430]; double-stranded DNA binding [GO:0003690]; DNA protection [GO:0042262]; symbiont-mediated evasion of DNA end degradation by host [GO:0099016]; symbiont-mediated suppression of host innate immune response [GO:0052170]; virus-mediated perturbation of host defense response [GO:0019049]	GO:0003690; GO:0019049; GO:0030430; GO:0042262; GO:0052170; GO:0099016
TRINITY_DN32688_c0_g1_i1	20	15	2.79657e-11	-0.0330537	Downregulated	SA-C vs SA	RS3_PHEZH	Isopentenyl-diphosphate delta-isomerase (IPP isomerase) (EC 5.3.3.2) (Isopentenyl diphosphate:dimethylallyl diphosphate isomerase) (Isopentenyl pyrophosphate isomerase) (Type 2 isopentenyl diphosphate isomerase) (IDI-2)	fni SACOL2341		isoprenoid biosynthetic process [GO:0008299]	cytoplasm [GO:0005737]	FMN binding [GO:0010181]; isopentenyl-diphosphate delta-isomerase activity [GO:0004452]; magnesium ion binding [GO:0000287]; NADPH binding [GO:0070402]; oxidoreductase activity [GO:0016491]		fni	5.3.3.2	FUNCTION: Involved in the biosynthesis of isoprenoids. Catalyzes the 1,3-allylic rearrangement of the homoallylic substrate isopentenyl (IPP) to its allylic isomer, dimethylallyl diphosphate (DMAPP). {ECO:0000255|HAMAP-Rule:MF_00354}.	Staphylococcus aureus (strain COL)	IDI2_STAAC	UPI0000054A18	cytoplasm [GO:0005737]; FMN binding [GO:0010181]; isopentenyl-diphosphate delta-isomerase activity [GO:0004452]; magnesium ion binding [GO:0000287]; NADPH binding [GO:0070402]; oxidoreductase activity [GO:0016491]; isoprenoid biosynthetic process [GO:0008299]	GO:0000287; GO:0004452; GO:0005737; GO:0008299; GO:0010181; GO:0016491; GO:0070402
TRINITY_DN505_c0_g1_i1	12	9345	9.68138e-67	0.561991	Upregulated	SA-C vs SA	RS20_PSEAE	Dihydroorotate dehydrogenase (quinone) (EC 1.3.5.2) (DHOdehase) (DHOD) (DHODase) (Dihydroorotate oxidase)	pyrD PA14_24640	PATHWAY: Pyrimidine metabolism; UMP biosynthesis via de novo pathway; orotate from (S)-dihydroorotate (quinone route): step 1/1. {ECO:0000255|HAMAP-Rule:MF_00225}.	'de novo' pyrimidine nucleobase biosynthetic process [GO:0006207]; 'de novo' UMP biosynthetic process [GO:0044205]	cytoplasm [GO:0005737]; plasma membrane [GO:0005886]	dihydroorotate dehydrogenase (quinone) activity [GO:0106430]		pyrD	1.3.5.2	FUNCTION: Catalyzes the conversion of dihydroorotate to orotate with quinone as electron acceptor. {ECO:0000255|HAMAP-Rule:MF_00225}.	Pseudomonas aeruginosa (strain UCBPP-PA14)	PYRD_PSEAB	UPI0000395F91	cytoplasm [GO:0005737]; plasma membrane [GO:0005886]; dihydroorotate dehydrogenase (quinone) activity [GO:0106430]; 'de novo' pyrimidine nucleobase biosynthetic process [GO:0006207]; 'de novo' UMP biosynthetic process [GO:0044205]	GO:0005737; GO:0005886; GO:0006207; GO:0044205; GO:0106430
TRINITY_DN7211_c1_g3_i1	1	3189	5.21705e-47	0.682773	Upregulated	SA-C vs SA	RS2_PSEAB	TBC1 domain family member 3K	TBC1D3K			plasma membrane [GO:0005886]	GTPase activator activity [GO:0005096]		TBC1D3K		FUNCTION: Acts as a GTPase activating protein for RAB5. Does not act on RAB4 or RAB11 (By similarity). {ECO:0000250|UniProtKB:Q8IZP1}.	Homo sapiens (Human)	TBC3K_HUMAN	UPI000292EF8E	plasma membrane [GO:0005886]; GTPase activator activity [GO:0005096]	GO:0005096; GO:0005886
TRINITY_DN673_c0_g3_i1	234	306	1.18717e-40	0.014577	Upregulated	SA-C vs SA	RS14_SALCH	Chaperone protein Skp	skp SPA0232		chaperone-mediated protein folding [GO:0061077]; protein maturation by protein folding [GO:0022417]; protein stabilization [GO:0050821]	cytosol [GO:0005829]; periplasmic space [GO:0042597]	unfolded protein binding [GO:0051082]		skp		FUNCTION: Molecular chaperone that interacts specifically with outer membrane proteins, thus maintaining the solubility of early folding intermediates during passage through the periplasm. {ECO:0000250}.	Salmonella paratyphi A (strain ATCC 9150 / SARB42)	SKP_SALPA	UPI0000059A3F	cytosol [GO:0005829]; periplasmic space [GO:0042597]; unfolded protein binding [GO:0051082]; chaperone-mediated protein folding [GO:0061077]; protein maturation by protein folding [GO:0022417]; protein stabilization [GO:0050821]	GO:0005829; GO:0022417; GO:0042597; GO:0050821; GO:0051082; GO:0061077
TRINITY_DN6_c0_g2_i2	131695	17	0	-0.775629	Downregulated	SA-C vs SA	RS12_STAAR	Small ribosomal subunit protein uS10 (30S ribosomal protein S10)	rpsJ CC_1247		translation [GO:0006412]	ribonucleoprotein complex [GO:1990904]; ribosome [GO:0005840]	structural constituent of ribosome [GO:0003735]; tRNA binding [GO:0000049]		rpsJ		FUNCTION: Involved in the binding of tRNA to the ribosomes. {ECO:0000255|HAMAP-Rule:MF_00508}.	Caulobacter vibrioides (strain ATCC 19089 / CIP 103742 / CB 15) (Caulobacter crescentus)	RS10_CAUVC	UPI0000134B9B	ribonucleoprotein complex [GO:1990904]; ribosome [GO:0005840]; structural constituent of ribosome [GO:0003735]; tRNA binding [GO:0000049]; translation [GO:0006412]	GO:0000049; GO:0003735; GO:0005840; GO:0006412; GO:1990904
TRINITY_DN1980_c0_g1_i1	9	10	6.50614e-32	0.000620202	Upregulated	SA-C vs SA	RS12_SALPA	Dye-decolorizing peroxidase (DyP) (EC 1.11.1.7)	MAP_0631c			cytosol [GO:0005829]; encapsulin nanocompartment [GO:0140737]; plasma membrane [GO:0005886]	heme binding [GO:0020037]; metal ion binding [GO:0046872]; peroxidase activity [GO:0004601]			1.11.1.7	FUNCTION: Cargo protein of a type 1 encapsulin nanocompartment. A heme-dependent peroxidase (By similarity). This cargo-loaded encapsulin nanocompartment is probably involved in protection against oxidative damage (By similarity). {ECO:0000250|UniProtKB:I6WZG6, ECO:0000250|UniProtKB:I6Y4U9}.	Mycolicibacterium paratuberculosis (strain ATCC BAA-968 / K-10) (Mycobacterium paratuberculosis)	DYP_MYCPA	UPI000023817A	cytosol [GO:0005829]; encapsulin nanocompartment [GO:0140737]; plasma membrane [GO:0005886]; heme binding [GO:0020037]; metal ion binding [GO:0046872]; peroxidase activity [GO:0004601]	GO:0004601; GO:0005829; GO:0005886; GO:0020037; GO:0046872; GO:0140737
TRINITY_DN24351_c0_g1_i1	17	7	3.99443e-09	-0.0844262	Downregulated	SA-C vs SA	RS10_CAUVC	Flagellar hook-basal body complex protein FliE	fliE PA1100		bacterial-type flagellum-dependent cell motility [GO:0071973]	bacterial-type flagellum basal body [GO:0009425]	cytoskeletal motor activity [GO:0003774]; structural molecule activity [GO:0005198]		fliE			Pseudomonas aeruginosa (strain ATCC 15692 / DSM 22644 / CIP 104116 / JCM 14847 / LMG 12228 / 1C / PRS 101 / PAO1)	FLIE_PSEAE	UPI000012A99E	bacterial-type flagellum basal body [GO:0009425]; cytoskeletal motor activity [GO:0003774]; structural molecule activity [GO:0005198]; bacterial-type flagellum-dependent cell motility [GO:0071973]	GO:0003774; GO:0005198; GO:0009425; GO:0071973
TRINITY_DN5270_c0_g1_i1	24	29	1.63327e-10	0.00780675	Upregulated	SA-C vs SA	RS1_SHIFL	Probable alpha-L-glutamate ligase (EC 6.3.2.-)	rimK PA5197		protein modification process [GO:0036211]; SOS response [GO:0009432]; translation [GO:0006412]	cytoplasm [GO:0005737]	ATP binding [GO:0005524]; metal ion binding [GO:0046872]; ribosomal S6-glutamic acid ligase activity [GO:0018169]		rimK	6.3.2.-		Pseudomonas aeruginosa (strain ATCC 15692 / DSM 22644 / CIP 104116 / JCM 14847 / LMG 12228 / 1C / PRS 101 / PAO1)	RIMK_PSEAE	UPI00000C5F4B	cytoplasm [GO:0005737]; ATP binding [GO:0005524]; metal ion binding [GO:0046872]; ribosomal S6-glutamic acid ligase activity [GO:0018169]; protein modification process [GO:0036211]; SOS response [GO:0009432]; translation [GO:0006412]	GO:0005524; GO:0005737; GO:0006412; GO:0009432; GO:0018169; GO:0036211; GO:0046872
TRINITY_DN461_c0_g1_i11	225.36	1	1.69479e-75	-0.472568	Downregulated	SA-C vs SA	RPSB_BACSU	Uncharacterized isochorismatase family protein PncA (EC 3.-.-.-)	pncA yueJ BSU31760				hydrolase activity [GO:0016787]		pncA	3.-.-.-		Bacillus subtilis (strain 168)	PNCA_BACSU	UPI00000609B7	hydrolase activity [GO:0016787]	GO:0016787
TRINITY_DN36_c0_g2_i3	1	7686	1.05619e-74	0.758141	Upregulated	SA-C vs SA	RPPH_PSEAE	Long-chain-fatty-acid--CoA ligase (EC 6.2.1.3) (Long-chain acyl-CoA synthetase) (Acyl-CoA synthetase)	fadD c2209	PATHWAY: Lipid metabolism; fatty acid beta-oxidation. {ECO:0000250|UniProtKB:P69451}.	fatty acid beta-oxidation [GO:0006635]	membrane [GO:0016020]	ATP binding [GO:0005524]; long-chain fatty acid-CoA ligase activity [GO:0004467]		fadD	6.2.1.3	FUNCTION: Catalyzes the esterification, concomitant with transport, of exogenous long-chain fatty acids into metabolically active CoA thioesters for subsequent degradation or incorporation into phospholipids. {ECO:0000250|UniProtKB:P69451}.	Escherichia coli O6:H1 (strain CFT073 / ATCC 700928 / UPEC)	LCFA_ECOL6	UPI000012E28D	membrane [GO:0016020]; ATP binding [GO:0005524]; long-chain fatty acid-CoA ligase activity [GO:0004467]; fatty acid beta-oxidation [GO:0006635]	GO:0004467; GO:0005524; GO:0006635; GO:0016020
TRINITY_DN16484_c0_g1_i2	1	0.73	2.0689e-52	-0.0353694	Downregulated	SA-C vs SA	RPOC_SALPA	C4-dicarboxylate transport transcriptional regulatory protein DctD	dctD RB1525 SMb20613		phosphorelay signal transduction system [GO:0000160]; regulation of DNA-templated transcription [GO:0006355]	cytoplasm [GO:0005737]	ATP binding [GO:0005524]; ATP hydrolysis activity [GO:0016887]; sequence-specific DNA binding [GO:0043565]	SMb20613	dctD		FUNCTION: Member of the two-component regulatory system DctB/DctD involved in the transport of C4-dicarboxylates. When activated by DctB acts in conjunction with sigma-54 to activate the transcription of dctA.	Rhizobium meliloti (strain 1021) (Ensifer meliloti) (Sinorhizobium meliloti)	DCTD_RHIME	UPI000012902F	cytoplasm [GO:0005737]; ATP binding [GO:0005524]; ATP hydrolysis activity [GO:0016887]; sequence-specific DNA binding [GO:0043565]; phosphorelay signal transduction system [GO:0000160]; regulation of DNA-templated transcription [GO:0006355]	GO:0000160; GO:0005524; GO:0005737; GO:0006355; GO:0016887; GO:0043565
TRINITY_DN11616_c0_g1_i1	16	1	3.94049e-08	-0.245948	Downregulated	SA-C vs SA	RPOB_SALG2	L-arginine-binding protein	aotJ PA0888		amino acid transport [GO:0006865]	extracellular space [GO:0005615]; outer membrane-bounded periplasmic space [GO:0030288]			aotJ		FUNCTION: Binds L-arginine with high affinity. Shows no measurable affinity for L-ornithine. {ECO:0000269|PubMed:31627455}.	Pseudomonas aeruginosa (strain ATCC 15692 / DSM 22644 / CIP 104116 / JCM 14847 / LMG 12228 / 1C / PRS 101 / PAO1)	ARGBP_PSEAE	UPI00000D4712	extracellular space [GO:0005615]; outer membrane-bounded periplasmic space [GO:0030288]; amino acid transport [GO:0006865]	GO:0005615; GO:0006865; GO:0030288
TRINITY_DN4868_c0_g1_i1	4082	13	5.16943e-203	-0.500986	Downregulated	SA-C vs SA	RNY_STAAR	Primosomal replication protein N	priB STM4392		DNA replication, synthesis of primer [GO:0006269]	primosome complex [GO:1990077]	single-stranded DNA binding [GO:0003697]		priB		FUNCTION: Binds single-stranded DNA at the primosome assembly site (PAS). During primosome assembly it facilitates the complex formation between PriA and DnaT. {ECO:0000255|HAMAP-Rule:MF_00720}.	Salmonella typhimurium (strain LT2 / SGSC1412 / ATCC 700720)	PRIB_SALTY	UPI00000CD5CF	primosome complex [GO:1990077]; single-stranded DNA binding [GO:0003697]; DNA replication, synthesis of primer [GO:0006269]	GO:0003697; GO:0006269; GO:1990077
TRINITY_DN38928_c0_g1_i2	17	1	2.21221e-08	-0.251142	Downregulated	SA-C vs SA	RNR_SHIFL	Molybdopterin synthase catalytic subunit (EC 2.8.1.12) (MPT synthase subunit 2) (Molybdenum cofactor biosynthesis protein E) (Molybdopterin-converting factor large subunit) (Molybdopterin-converting factor subunit 2)	moaE MW2189	PATHWAY: Cofactor biosynthesis; molybdopterin biosynthesis.	Mo-molybdopterin cofactor biosynthetic process [GO:0006777]		molybdopterin synthase activity [GO:0030366]		moaE	2.8.1.12	FUNCTION: Converts molybdopterin precursor Z into molybdopterin. This requires the incorporation of two sulfur atoms into precursor Z to generate a dithiolene group. The sulfur is provided by MoaD (By similarity). {ECO:0000250}.	Staphylococcus aureus (strain MW2)	MOAE_STAAW	UPI0000054752	molybdopterin synthase activity [GO:0030366]; Mo-molybdopterin cofactor biosynthetic process [GO:0006777]	GO:0006777; GO:0030366
TRINITY_DN45859_c0_g1_i1	23	7396	1.79582e-49	0.486212	Upregulated	SA-C vs SA	RNLS_PSESM	Protein PilH	pilH PA0409		phosphorelay signal transduction system [GO:0000160]				pilH		FUNCTION: May be a part of a signal-transduction system that regulates twitching motility by controlling pilus function (extension and retraction).	Pseudomonas aeruginosa (strain ATCC 15692 / DSM 22644 / CIP 104116 / JCM 14847 / LMG 12228 / 1C / PRS 101 / PAO1)	PILH_PSEAE	UPI0000131ACA	phosphorelay signal transduction system [GO:0000160]	GO:0000160
TRINITY_DN106_c0_g2_i1	29	30306.2	8.19161e-98	0.58719	Upregulated	SA-C vs SA	RMTB_SERMA	Alkyl hydroperoxide reductase C (EC 1.11.1.26) (26 kDa antigen) (Peroxiredoxin) (Thioredoxin peroxidase)	ahpC tsaA HP_1563		cell redox homeostasis [GO:0045454]; hydrogen peroxide catabolic process [GO:0042744]; response to oxidative stress [GO:0006979]	cytosol [GO:0005829]	NADH-dependent peroxiredoxin activity [GO:0102039]; thioredoxin peroxidase activity [GO:0008379]		ahpC	1.11.1.26	FUNCTION: Thiol-specific peroxidase that catalyzes the reduction of hydrogen peroxide and organic hydroperoxides to water and alcohols, respectively. Plays a role in cell protection against oxidative stress by detoxifying peroxides. {ECO:0000250|UniProtKB:P0A251}.	Helicobacter pylori (strain ATCC 700392 / 26695) (Campylobacter pylori)	AHPC_HELPY	UPI0000137735	cytosol [GO:0005829]; NADH-dependent peroxiredoxin activity [GO:0102039]; thioredoxin peroxidase activity [GO:0008379]; cell redox homeostasis [GO:0045454]; hydrogen peroxide catabolic process [GO:0042744]; response to oxidative stress [GO:0006979]	GO:0005829; GO:0006979; GO:0008379; GO:0042744; GO:0045454; GO:0102039
TRINITY_DN26_c0_g1_i1	21	13612	2.10808e-72	0.546269	Upregulated	SA-C vs SA	RMLC_PSEAE	Ferric uptake regulation protein (Ferric uptake regulator)	fur PA4764		negative regulation of DNA-templated transcription [GO:0045892]; negative regulation of siderophore biosynthetic process [GO:1900705]; siderophore biosynthetic process [GO:0019290]	cytosol [GO:0005829]; protein-DNA complex [GO:0032993]	DNA-binding transcription factor activity [GO:0003700]; DNA-binding transcription repressor activity [GO:0001217]; ferrous iron binding [GO:0008198]; transcription cis-regulatory region binding [GO:0000976]; zinc ion binding [GO:0008270]		fur		FUNCTION: Fur acts as a repressor, employing Fe(2+) as a cofactor to bind the operator of the iron transport operon. Involved in exotoxin A regulation, siderophore regulation and manganese susceptibility.	Pseudomonas aeruginosa (strain ATCC 15692 / DSM 22644 / CIP 104116 / JCM 14847 / LMG 12228 / 1C / PRS 101 / PAO1)	FUR_PSEAE	UPI000012AD84	cytosol [GO:0005829]; protein-DNA complex [GO:0032993]; DNA-binding transcription factor activity [GO:0003700]; DNA-binding transcription repressor activity [GO:0001217]; ferrous iron binding [GO:0008198]; transcription cis-regulatory region binding [GO:0000976]; zinc ion binding [GO:0008270]; negative regulation of DNA-templated transcription [GO:0045892]; negative regulation of siderophore bios…	GO:0000976; GO:0001217; GO:0003700; GO:0005829; GO:0008198; GO:0008270; GO:0019290; GO:0032993; GO:0045892; GO:1900705
TRINITY_DN6_c0_g1_i8	9939.98	94747	0.00285198	0.18476	Upregulated	SA-C vs SA	RL7_PSEAE	Small ribosomal subunit protein bS1 (30S ribosomal protein S1)	rpsA SF0907 S0971		translation [GO:0006412]	cytosolic small ribosomal subunit [GO:0022627]	mRNA binding [GO:0003729]; structural constituent of ribosome [GO:0003735]		rpsA		FUNCTION: Binds mRNA; thus facilitating recognition of the initiation point. It is needed to translate mRNA with a short Shine-Dalgarno (SD) purine-rich sequence (By similarity). {ECO:0000250}.	Shigella flexneri	RS1_SHIFL	UPI0000134E23	cytosolic small ribosomal subunit [GO:0022627]; mRNA binding [GO:0003729]; structural constituent of ribosome [GO:0003735]; translation [GO:0006412]	GO:0003729; GO:0003735; GO:0006412; GO:0022627
TRINITY_DN41979_c0_g1_i1	38	5	9.20566e-18	-0.182168	Downregulated	SA-C vs SA	RL31_SALPA	NADH-quinone oxidoreductase subunit A 1 (EC 7.1.1.-) (NADH dehydrogenase I subunit A 1) (NDH-1 subunit A 1) (NUO1 1)	nuoA1 PA1883			plasma membrane [GO:0005886]; respiratory chain complex I [GO:0045271]	NADH dehydrogenase (ubiquinone) activity [GO:0008137]; NADH:ubiquinone reductase (non-electrogenic) activity [GO:0050136]; quinone binding [GO:0048038]		nuoA1	7.1.1.-	FUNCTION: NDH-1 shuttles electrons from NADH, via FMN and iron-sulfur (Fe-S) centers, to quinones in the respiratory chain. The immediate electron acceptor for the enzyme in this species is believed to be ubiquinone. Couples the redox reaction to proton translocation (for every two electrons transferred, four hydrogen ions are translocated across the cytoplasmic membrane), and thus conserves the …	Pseudomonas aeruginosa (strain ATCC 15692 / DSM 22644 / CIP 104116 / JCM 14847 / LMG 12228 / 1C / PRS 101 / PAO1)	NUOA1_PSEAE	UPI00000C54EC	plasma membrane [GO:0005886]; respiratory chain complex I [GO:0045271]; NADH dehydrogenase (ubiquinone) activity [GO:0008137]; NADH:ubiquinone reductase (non-electrogenic) activity [GO:0050136]; quinone binding [GO:0048038]	GO:0005886; GO:0008137; GO:0045271; GO:0048038; GO:0050136
TRINITY_DN8148_c0_g3_i4	43021.3	5	2.36071e-305	-0.784623	Downregulated	SA-C vs SA	RL24_STAAR	Testis-specific Y-encoded protein 10	TSPY10		cell differentiation [GO:0030154]; gonadal mesoderm development [GO:0007506]; nucleosome assembly [GO:0006334]; spermatogenesis [GO:0007283]	chromatin [GO:0000785]; cytoplasm [GO:0005737]; nucleus [GO:0005634]	chromatin binding [GO:0003682]; histone binding [GO:0042393]		TSPY10		FUNCTION: May be involved in sperm differentiation and proliferation. {ECO:0000250|UniProtKB:Q01534}.	Homo sapiens (Human)	TSPYA_HUMAN	UPI000013E91A	chromatin [GO:0000785]; cytoplasm [GO:0005737]; nucleus [GO:0005634]; chromatin binding [GO:0003682]; histone binding [GO:0042393]; cell differentiation [GO:0030154]; gonadal mesoderm development [GO:0007506]; nucleosome assembly [GO:0006334]; spermatogenesis [GO:0007283]	GO:0000785; GO:0003682; GO:0005634; GO:0005737; GO:0006334; GO:0007283; GO:0007506; GO:0030154; GO:0042393
TRINITY_DN1067_c0_g1_i3	116.88	128	2.09288e-34	-0.000620202	Downregulated	SA-C vs SA	RL23_SALTI	Glutamate-pyruvate aminotransferase AlaA (EC 2.6.1.2)	alaA yfbQ SF2366 S2501	PATHWAY: Amino-acid biosynthesis; L-alanine biosynthesis. {ECO:0000250|UniProtKB:P0A959}.	D-alanine biosynthetic process [GO:0030632]	cytoplasm [GO:0005737]	L-alanine:2-oxoglutarate aminotransferase activity [GO:0004021]; pyridoxal phosphate binding [GO:0030170]		alaA	2.6.1.2	FUNCTION: Involved in the biosynthesis of alanine. Catalyzes the transamination of pyruvate by glutamate, leading to the formation of L-alanine and 2-oxoglutarate. Is also able to catalyze the reverse reaction. {ECO:0000250|UniProtKB:P0A959}.	Shigella flexneri	ALAA_SHIFL	UPI000013ADE4	cytoplasm [GO:0005737]; L-alanine:2-oxoglutarate aminotransferase activity [GO:0004021]; pyridoxal phosphate binding [GO:0030170]; D-alanine biosynthetic process [GO:0030632]	GO:0004021; GO:0005737; GO:0030170; GO:0030632
TRINITY_DN482_c0_g1_i2	28.37	44	1.21325e-10	0.0291925	Upregulated	SA-C vs SA	RL20_SALPA	Proline-rich protein 20B	PRR20B						PRR20B			Homo sapiens (Human)	PR20B_HUMAN	UPI0000071BFE
TRINITY_DN31352_c0_g1_i1	13	1307	1.20977e-13	0.386601	Upregulated	SA-C vs SA	RL19_PSEAE	Alpha-hemolysin (Alpha-HL) (Alpha-toxin)	hly hla SAOUHSC_01121		cytolysis in another organism [GO:0051715]	extracellular region [GO:0005576]	toxin activity [GO:0090729]		hly		FUNCTION: Alpha-toxin binds to the membrane of eukaryotic cells resulting in the release of low-molecular weight molecules and leading to an eventual osmotic lysis. Inhibits host neutrophil chemotaxis to the lesion region (Probable). Heptamer oligomerization and pore formation is required for lytic activity (By similarity). {ECO:0000250|UniProtKB:P09616, ECO:0000305|PubMed:3679545}.	Staphylococcus aureus (strain NCTC 8325 / PS 47)	HLA_STAA8	UPI00004B5BAF	extracellular region [GO:0005576]; toxin activity [GO:0090729]; cytolysis in another organism [GO:0051715]	GO:0005576; GO:0051715; GO:0090729
TRINITY_DN13713_c0_g1_i1	1	1	5.79882e-57	-0.00840656	Downregulated	SA-C vs SA	RL13_HUMAN	Choriogonadotropin subunit beta 3 (Choriogonadotropin subunit beta) (CG-beta) (Chorionic gonadotropin chain beta)	CGB3 CGB; CGB5; CGB8		apoptotic process [GO:0006915]; cell-cell signaling [GO:0007267]; female gamete generation [GO:0007292]; G protein-coupled receptor signaling pathway [GO:0007186]; hormone-mediated signaling pathway [GO:0009755]; signal transduction [GO:0007165]	cytoplasm [GO:0005737]; extracellular region [GO:0005576]; extracellular space [GO:0005615]; pituitary gonadotropin complex [GO:0061696]	hormone activity [GO:0005179]	; ;	CGB3; CGB5; CGB8		FUNCTION: Beta subunit of the human chorionic gonadotropin (hCG). hCG is a complex glycoprotein composed of two glycosylated subunits alpha and beta which are non-covalently associated. The alpha subunit is identical to those in the pituitary gonadotropin hormones (LH, FSH and TSH). The beta subunits are distinct in each of the hormones and confer receptor and biological specificity. Has an essen…	Homo sapiens (Human)	CGB3_HUMAN	UPI0000035497	cytoplasm [GO:0005737]; extracellular region [GO:0005576]; extracellular space [GO:0005615]; pituitary gonadotropin complex [GO:0061696]; hormone activity [GO:0005179]; apoptotic process [GO:0006915]; cell-cell signaling [GO:0007267]; female gamete generation [GO:0007292]; G protein-coupled receptor signaling pathway [GO:0007186]; hormone-mediated signaling pathway [GO:0009755]; signal transducti…	GO:0005179; GO:0005576; GO:0005615; GO:0005737; GO:0006915; GO:0007165; GO:0007186; GO:0007267; GO:0007292; GO:0009755; GO:0061696
TRINITY_DN2_c0_g5_i1	41615.4	4	6.55047e-304	-0.800894	Downregulated	SA-C vs SA	RL11_STAAR	Elongin-A2 (EloA2) (RNA polymerase II transcription factor SIII subunit A2) (Transcription elongation factor B polypeptide 3B)	ELOA2 TCEB3B TCEB3L		regulation of DNA-templated transcription elongation [GO:0032784]; transcription by RNA polymerase II [GO:0006366]; transcription elongation by RNA polymerase II [GO:0006368]	elongin complex [GO:0070449]; nucleoplasm [GO:0005654]			ELOA2		FUNCTION: SIII, also known as elongin, is a general transcription elongation factor that increases the RNA polymerase II transcription elongation past template-encoded arresting sites. Subunit A2 is transcriptionally active but its transcription activity is not enhanced by binding to the dimeric complex of the SIII regulatory subunits B and C (elongin BC complex). {ECO:0000269|PubMed:10692460}.	Homo sapiens (Human)	ELOA2_HUMAN	UPI0000140A82	elongin complex [GO:0070449]; nucleoplasm [GO:0005654]; regulation of DNA-templated transcription elongation [GO:0032784]; transcription by RNA polymerase II [GO:0006366]; transcription elongation by RNA polymerase II [GO:0006368]	GO:0005654; GO:0006366; GO:0006368; GO:0032784; GO:0070449
TRINITY_DN849_c0_g1_i1	27	4	4.15962e-13	-0.172007	Downregulated	SA-C vs SA	RL10_SALPA	Uncharacterized protein MW0186	MW0186			plasma membrane [GO:0005886]						Staphylococcus aureus (strain MW2)	Y186_STAAW	UPI00000D9BE9	plasma membrane [GO:0005886]	GO:0005886
TRINITY_DN97_c0_g3_i1	14	11518	1.83097e-72	0.566696	Upregulated	SA-C vs SA	RISB_PSEA8	Putative NADP-dependent oxidoreductase YfmJ (EC 1.-.-.-)	yfmJ BSU07450		catabolic process [GO:0009056]; response to toxic substance [GO:0009636]		oxidoreductase activity, acting on the CH-CH group of donors, NAD or NADP as acceptor [GO:0016628]		yfmJ	1.-.-.-	FUNCTION: Putative quinone oxidoreductase that may contribute to the degradation of aromatic compounds. {ECO:0000305}.	Bacillus subtilis (strain 168)	YFMJ_BACSU	UPI0000060082	oxidoreductase activity, acting on the CH-CH group of donors, NAD or NADP as acceptor [GO:0016628]; catabolic process [GO:0009056]; response to toxic substance [GO:0009636]	GO:0009056; GO:0009636; GO:0016628
TRINITY_DN20825_c0_g5_i1	24	3369	4.75022e-26	0.415198	Upregulated	SA-C vs SA	RIR1_CHLMU	Septation ring formation regulator EzrA	ezrA SAOUHSC_01827		division septum assembly [GO:0000917]; septin ring assembly [GO:0000921]	plasma membrane [GO:0005886]; septin ring [GO:0005940]			ezrA		FUNCTION: Negative regulator of FtsZ ring formation; modulates the frequency and position of FtsZ ring formation. Inhibits FtsZ ring formation at polar sites. Interacts either with FtsZ or with one of its binding partners to promote depolymerization. {ECO:0000255|HAMAP-Rule:MF_00728}.	Staphylococcus aureus (strain NCTC 8325 / PS 47)	EZRA_STAA8	UPI000069AAE2	plasma membrane [GO:0005886]; septin ring [GO:0005940]; division septum assembly [GO:0000917]; septin ring assembly [GO:0000921]	GO:0000917; GO:0000921; GO:0005886; GO:0005940
TRINITY_DN868_c1_g1_i1	1	1767	3.25805e-32	0.632188	Upregulated	SA-C vs SA	RIMK_PSEAE	Uncharacterized protein PA2604	PA2604		negative regulation of apoptotic process [GO:0043066]; regulation of proteolysis [GO:0030162]	plasma membrane [GO:0005886]	calcium channel activity [GO:0005262]					Pseudomonas aeruginosa (strain ATCC 15692 / DSM 22644 / CIP 104116 / JCM 14847 / LMG 12228 / 1C / PRS 101 / PAO1)	Y2604_PSEAE	UPI000013BE74	plasma membrane [GO:0005886]; calcium channel activity [GO:0005262]; negative regulation of apoptotic process [GO:0043066]; regulation of proteolysis [GO:0030162]	GO:0005262; GO:0005886; GO:0030162; GO:0043066
TRINITY_DN4517_c0_g2_i1	12207	9	1.24803e-250	-0.626341	Downregulated	SA-C vs SA	RIHA_SHESA	DNA topoisomerase 4 subunit A (EC 5.6.2.2) (Topoisomerase IV subunit A)	parC MW1242		chromosome segregation [GO:0007059]; DNA topological change [GO:0006265]	chromosome [GO:0005694]; cytoplasm [GO:0005737]; DNA topoisomerase type II (double strand cut, ATP-hydrolyzing) complex [GO:0009330]; extrinsic component of plasma membrane [GO:0019897]	ATP binding [GO:0005524]; DNA binding [GO:0003677]; DNA negative supercoiling activity [GO:0034335]		parC	5.6.2.2	FUNCTION: Topoisomerase IV is essential for chromosome segregation. It relaxes supercoiled DNA. Performs the decatenation events required during the replication of a circular DNA molecule. {ECO:0000255|HAMAP-Rule:MF_00937}.	Staphylococcus aureus (strain MW2)	PARC_STAAW	UPI00000D9DD3	chromosome [GO:0005694]; cytoplasm [GO:0005737]; DNA topoisomerase type II (double strand cut, ATP-hydrolyzing) complex [GO:0009330]; extrinsic component of plasma membrane [GO:0019897]; ATP binding [GO:0005524]; DNA binding [GO:0003677]; DNA negative supercoiling activity [GO:0034335]; chromosome segregation [GO:0007059]; DNA topological change [GO:0006265]	GO:0003677; GO:0005524; GO:0005694; GO:0005737; GO:0006265; GO:0007059; GO:0009330; GO:0019897; GO:0034335
TRINITY_DN262_c0_g7_i1	1	28751	1.66527e-124	0.871169	Upregulated	SA-C vs SA	RFAP_PSEAE
TRINITY_DN832_c0_g1_i1	1253	1	1.58101e-151	-0.619551	Downregulated	SA-C vs SA	REX_STAAR	Variable charge X-linked protein 3 (Variable charge protein on X with eight repeats) (VCX-8r) (Variably charged protein X-A) (VCX-A)	VCX3A VCX3 VCX8R VCXA		brain development [GO:0007420]	nucleolus [GO:0005730]; nucleus [GO:0005634]			VCX3A		FUNCTION: May mediate a process in spermatogenesis or may play a role in sex ratio distortion.	Homo sapiens (Human)	VCX3_HUMAN	UPI0000138292	nucleolus [GO:0005730]; nucleus [GO:0005634]; brain development [GO:0007420]	GO:0005634; GO:0005730; GO:0007420
TRINITY_DN1799_c1_g1_i4	244.27	1	3.95832e-79	-0.479471	Downregulated	SA-C vs SA	RECX_STAAR	RNA polymerase-binding transcription factor DksA	dksA SF0137 S0140		regulation of gene expression [GO:0010468]	cytoplasm [GO:0005737]	zinc ion binding [GO:0008270]		dksA		FUNCTION: Transcription factor that acts by binding directly to the RNA polymerase (RNAP). Required for negative regulation of rRNA expression and positive regulation of several amino acid biosynthesis promoters. Also required for regulation of fis expression. {ECO:0000255|HAMAP-Rule:MF_00926}.	Shigella flexneri	DKSA_SHIFL	UPI0000000B51	cytoplasm [GO:0005737]; zinc ion binding [GO:0008270]; regulation of gene expression [GO:0010468]	GO:0005737; GO:0008270; GO:0010468
TRINITY_DN298_c0_g1_i2	12043.7	21.54	4.75424e-250	-0.55042	Downregulated	SA-C vs SA	RECU_STAAS	Glutathione reductase (GR) (GRase) (EC 1.8.1.7)	gor PA2025		cell redox homeostasis [GO:0045454]	cytoplasm [GO:0005737]	flavin adenine dinucleotide binding [GO:0050660]; glutathione-disulfide reductase (NADPH) activity [GO:0004362]; thioredoxin-disulfide reductase (NADPH) activity [GO:0004791]		gor	1.8.1.7	FUNCTION: Maintains high levels of reduced glutathione in the cytosol.	Pseudomonas aeruginosa (strain ATCC 15692 / DSM 22644 / CIP 104116 / JCM 14847 / LMG 12228 / 1C / PRS 101 / PAO1)	GSHR_PSEAE	UPI000012BC04	cytoplasm [GO:0005737]; flavin adenine dinucleotide binding [GO:0050660]; glutathione-disulfide reductase (NADPH) activity [GO:0004362]; thioredoxin-disulfide reductase (NADPH) activity [GO:0004791]; cell redox homeostasis [GO:0045454]	GO:0004362; GO:0004791; GO:0005737; GO:0045454; GO:0050660
TRINITY_DN36066_c0_g1_i1	2906	2	3.23824e-188	-0.632239	Downregulated	SA-C vs SA	RECO_STAAW	2-isopropylmalate synthase (EC 2.3.3.13) (Alpha-IPM synthase) (Alpha-isopropylmalate synthase)	leuA PA3792	PATHWAY: Amino-acid biosynthesis; L-leucine biosynthesis; L-leucine from 3-methyl-2-oxobutanoate: step 1/4. {ECO:0000255|HAMAP-Rule:MF_00572}.	L-leucine biosynthetic process [GO:0009098]	cytoplasm [GO:0005737]	2-isopropylmalate synthase activity [GO:0003852]; acetyl-CoA C-acetyltransferase activity [GO:0003985]; magnesium ion binding [GO:0000287]		leuA	2.3.3.13	FUNCTION: Catalyzes the condensation of the acetyl group of acetyl-CoA with 3-methyl-2-oxobutanoate (2-ketoisovalerate) to form 3-carboxy-3-hydroxy-4-methylpentanoate (2-isopropylmalate). {ECO:0000255|HAMAP-Rule:MF_00572}.	Pseudomonas aeruginosa (strain ATCC 15692 / DSM 22644 / CIP 104116 / JCM 14847 / LMG 12228 / 1C / PRS 101 / PAO1)	LEU1_PSEAE	UPI000012E4CC	cytoplasm [GO:0005737]; 2-isopropylmalate synthase activity [GO:0003852]; acetyl-CoA C-acetyltransferase activity [GO:0003985]; magnesium ion binding [GO:0000287]; L-leucine biosynthetic process [GO:0009098]	GO:0000287; GO:0003852; GO:0003985; GO:0005737; GO:0009098
TRINITY_DN45420_c0_g1_i1	19	8696	9.0975e-58	0.516454	Upregulated	SA-C vs SA	RECA_PSEAB	Pyruvate formate-lyase-activating enzyme (PFL-activating enzyme) (EC 1.97.1.4)	pflA MW0202		glucose metabolic process [GO:0006006]	cytoplasm [GO:0005737]	4 iron, 4 sulfur cluster binding [GO:0051539]; [formate-C-acetyltransferase]-activating enzyme activity [GO:0043365]; metal ion binding [GO:0046872]		pflA	1.97.1.4	FUNCTION: Activation of pyruvate formate-lyase under anaerobic conditions by generation of an organic free radical, using S-adenosylmethionine and reduced flavodoxin as cosubstrates to produce 5'-deoxy-adenosine. {ECO:0000250}.	Staphylococcus aureus (strain MW2)	PFLA_STAAW	UPI00000546A2	cytoplasm [GO:0005737]; 4 iron, 4 sulfur cluster binding [GO:0051539]; [formate-C-acetyltransferase]-activating enzyme activity [GO:0043365]; metal ion binding [GO:0046872]; glucose metabolic process [GO:0006006]	GO:0005737; GO:0006006; GO:0043365; GO:0046872; GO:0051539
TRINITY_DN51613_c0_g1_i1	14	1	4.1078e-07	-0.234508	Downregulated	SA-C vs SA	RDOA_SALTY	Protein RecA (Recombinase A)	recA PA14_17530		DNA recombination [GO:0006310]; DNA repair [GO:0006281]; SOS response [GO:0009432]	cytosol [GO:0005829]	ATP binding [GO:0005524]; ATP hydrolysis activity [GO:0016887]; ATP-dependent DNA damage sensor activity [GO:0140664]; damaged DNA binding [GO:0003684]; single-stranded DNA binding [GO:0003697]		recA		FUNCTION: Can catalyze the hydrolysis of ATP in the presence of single-stranded DNA, the ATP-dependent uptake of single-stranded DNA by duplex DNA, and the ATP-dependent hybridization of homologous single-stranded DNAs. It interacts with LexA causing its activation and leading to its autocatalytic cleavage. {ECO:0000255|HAMAP-Rule:MF_00268}.	Pseudomonas aeruginosa (strain UCBPP-PA14)	RECA_PSEAB	UPI0000133516	cytosol [GO:0005829]; ATP binding [GO:0005524]; ATP hydrolysis activity [GO:0016887]; ATP-dependent DNA damage sensor activity [GO:0140664]; damaged DNA binding [GO:0003684]; single-stranded DNA binding [GO:0003697]; DNA recombination [GO:0006310]; DNA repair [GO:0006281]; SOS response [GO:0009432]	GO:0003684; GO:0003697; GO:0005524; GO:0005829; GO:0006281; GO:0006310; GO:0009432; GO:0016887; GO:0140664
TRINITY_DN595_c0_g2_i1	2574	30	5.7861e-183	-0.389833	Downregulated	SA-C vs SA	RBSD_STAAM	RNA pyrophosphohydrolase (EC 3.6.1.-) ((Di)nucleoside polyphosphate hydrolase)	rppH nudH PA0336		mRNA catabolic process [GO:0006402]	cytoplasm [GO:0005737]	mRNA 5'-diphosphatase activity [GO:0034353]		rppH	3.6.1.-	FUNCTION: Accelerates the degradation of transcripts by removing pyrophosphate from the 5'-end of triphosphorylated RNA, leading to a more labile monophosphorylated state that can stimulate subsequent ribonuclease cleavage. {ECO:0000255|HAMAP-Rule:MF_00298}.	Pseudomonas aeruginosa (strain ATCC 15692 / DSM 22644 / CIP 104116 / JCM 14847 / LMG 12228 / 1C / PRS 101 / PAO1)	RPPH_PSEAE	UPI0000130902	cytoplasm [GO:0005737]; mRNA 5'-diphosphatase activity [GO:0034353]; mRNA catabolic process [GO:0006402]	GO:0005737; GO:0006402; GO:0034353
TRINITY_DN11647_c0_g1_i1	3	4	7.25215e-15	0.0162406	Upregulated	SA-C vs SA	RBP2_HUMAN	Arginine repressor	argR SAR1598	PATHWAY: Amino-acid biosynthesis; L-arginine biosynthesis [regulation].	L-arginine biosynthetic process [GO:0006526]; protein complex oligomerization [GO:0051259]; regulation of arginine biosynthetic process [GO:1900079]	cytoplasm [GO:0005737]	arginine binding [GO:0034618]; DNA binding [GO:0003677]; DNA-binding transcription factor activity [GO:0003700]		argR		FUNCTION: Regulates arginine biosynthesis genes. {ECO:0000255|HAMAP-Rule:MF_00173}.	Staphylococcus aureus (strain MRSA252)	ARGR_STAAR	UPI00000D783E	cytoplasm [GO:0005737]; arginine binding [GO:0034618]; DNA binding [GO:0003677]; DNA-binding transcription factor activity [GO:0003700]; L-arginine biosynthetic process [GO:0006526]; protein complex oligomerization [GO:0051259]; regulation of arginine biosynthetic process [GO:1900079]	GO:0003677; GO:0003700; GO:0005737; GO:0006526; GO:0034618; GO:0051259; GO:1900079
TRINITY_DN744_c0_g4_i1	344742	425	0	-0.582297	Downregulated	SA-C vs SA	QOX3_STAAM	Thioredoxin 1 (Trx-1)	trxA STY3639 t3381		cell redox homeostasis [GO:0045454]	cytosol [GO:0005829]	protein-disulfide reductase activity [GO:0015035]		trxA		FUNCTION: Participates in various redox reactions through the reversible oxidation of its active center dithiol to a disulfide and catalyzes dithiol-disulfide exchange reactions. {ECO:0000250}.	Salmonella typhi	THIO_SALTI	UPI000003112A	cytosol [GO:0005829]; protein-disulfide reductase activity [GO:0015035]; cell redox homeostasis [GO:0045454]	GO:0005829; GO:0015035; GO:0045454
TRINITY_DN918_c0_g2_i2	4186.33	1	4.21724e-204	-0.7229	Downregulated	SA-C vs SA	PYRR_STAAR	Nucleoid-associated protein SAR0478	SAR0478			bacterial nucleoid [GO:0043590]; cytosol [GO:0005829]	DNA binding [GO:0003677]				FUNCTION: Binds to DNA and alters its conformation. May be involved in regulation of gene expression, nucleoid organization and DNA protection. {ECO:0000255|HAMAP-Rule:MF_00274}.	Staphylococcus aureus (strain MRSA252)	Y478_STAAR	UPI0000054501	bacterial nucleoid [GO:0043590]; cytosol [GO:0005829]; DNA binding [GO:0003677]	GO:0003677; GO:0005829; GO:0043590
TRINITY_DN9832_c0_g3_i3	3	762.98	1.55865e-13	0.466114	Upregulated	SA-C vs SA	PYRD_PSEAB	Uncharacterized oxidoreductase YxbG (EC 1.-.-.-)	yxbG E3BR yxaU BSU39840				oxidoreductase activity [GO:0016491]		yxbG	1.-.-.-		Bacillus subtilis (strain 168)	YXBG_BACSU	UPI00001B0964	oxidoreductase activity [GO:0016491]	GO:0016491
TRINITY_DN35705_c0_g1_i1	43	19422	1.05058e-71	0.515321	Upregulated	SA-C vs SA	PVDA_PSEAE	Alginate biosynthesis sensor protein KinB (EC 2.7.13.3)	kinB		alginic acid biosynthetic process [GO:0042121]	plasma membrane [GO:0005886]	ATP binding [GO:0005524]; phosphorelay sensor kinase activity [GO:0000155]		kinB	2.7.13.3	FUNCTION: Member of the two-component regulatory system AlgB/KinB involved in regulation of alginate biosynthesis genes. KinB functions as a membrane-associated protein kinase that phosphorylates AlgB, probably in response to environmental signals. {ECO:0000269|PubMed:9218420}.	Pseudomonas aeruginosa	KINB_PSEAI	UPI00000BEEE0	plasma membrane [GO:0005886]; ATP binding [GO:0005524]; phosphorelay sensor kinase activity [GO:0000155]; alginic acid biosynthetic process [GO:0042121]	GO:0000155; GO:0005524; GO:0005886; GO:0042121
TRINITY_DN127_c0_g3_i3	22.35	2550	7.67485e-21	0.397438	Upregulated	SA-C vs SA	PUUP_ECOLI	Pyruvate/proton symporter BtsT (Brenztraubensaure transporter) (Pyruvate/H(+) symporter)	btsT yjiY b4354 JW5791		cellular response to nutrient levels [GO:0031669]; cellular response to starvation [GO:0009267]; DNA damage response [GO:0006974]; plasma membrane pyruvate transport [GO:0006849]	plasma membrane [GO:0005886]	pyruvate secondary active transmembrane transporter activity [GO:0005477]; symporter activity [GO:0015293]		btsT		FUNCTION: Transports pyruvate with a high affinity and specificity. The process is driven by the proton motive force (PubMed:29061664). Under nutrient limiting conditions, mediates the uptake of pyruvate, thus enabling it to be used as a carbon source for the growth and survival (PubMed:29061664). Part of a nutrient-sensing regulatory network composed of the two-component regulatory systems BtsS/…	Escherichia coli (strain K12)	BTST_ECOLI	UPI0000683EA8	plasma membrane [GO:0005886]; pyruvate secondary active transmembrane transporter activity [GO:0005477]; symporter activity [GO:0015293]; cellular response to nutrient levels [GO:0031669]; cellular response to starvation [GO:0009267]; DNA damage response [GO:0006974]; plasma membrane pyruvate transport [GO:0006849]	GO:0005477; GO:0005886; GO:0006849; GO:0006974; GO:0009267; GO:0015293; GO:0031669
TRINITY_DN40774_c0_g1_i1	34	6864	2.53666e-40	0.446329	Upregulated	SA-C vs SA	PURU_SYNY3	Type II NADH:quinone oxidoreductase (EC 1.6.5.9) (NDH-2)	SAV0941		aerobic electron transport chain [GO:0019646]	plasma membrane [GO:0005886]	NAD(P)H dehydrogenase (quinone) activity [GO:0003955]; NADH:ubiquinone reductase (non-electrogenic) activity [GO:0050136]			1.6.5.9	FUNCTION: Alternative, nonproton pumping NADH:quinone oxidoreductase that delivers electrons to the respiratory chain by oxidation of NADH and reduction of quinones, and contributes to the regeneration of NAD(+). {ECO:0000250|UniProtKB:Q2FZV7}.	Staphylococcus aureus (strain Mu50 / ATCC 700699)	NDH_STAAM	UPI0000054716	plasma membrane [GO:0005886]; NAD(P)H dehydrogenase (quinone) activity [GO:0003955]; NADH:ubiquinone reductase (non-electrogenic) activity [GO:0050136]; aerobic electron transport chain [GO:0019646]	GO:0003955; GO:0005886; GO:0019646; GO:0050136
TRINITY_DN292_c0_g1_i16	4185	2	4.32428e-204	-0.663487	Downregulated	SA-C vs SA	PURE_BACSU	Serine hydroxymethyltransferase 2 (SHMT 2) (Serine methylase 2) (EC 2.1.2.1)	glyA2 PA2444	PATHWAY: One-carbon metabolism; tetrahydrofolate interconversion. {ECO:0000255|HAMAP-Rule:MF_00051}.; PATHWAY: Amino-acid biosynthesis; glycine biosynthesis; glycine from L-serine: step 1/1. {ECO:0000255|HAMAP-Rule:MF_00051}.	glycine biosynthetic process from serine [GO:0019264]; tetrahydrofolate interconversion [GO:0035999]; tetrahydrofolate metabolic process [GO:0046653]	cytoplasm [GO:0005737]; cytosol [GO:0005829]	glycine hydroxymethyltransferase activity [GO:0004372]; pyridoxal phosphate binding [GO:0030170]		glyA2	2.1.2.1	FUNCTION: Catalyzes the reversible interconversion of serine and glycine with tetrahydrofolate (THF) serving as the one-carbon carrier. This reaction serves as the major source of one-carbon groups required for the biosynthesis of purines, thymidylate, methionine, and other important biomolecules. Also exhibits THF-independent aldolase activity toward beta-hydroxyamino acids, producing glycine an…	Pseudomonas aeruginosa (strain ATCC 15692 / DSM 22644 / CIP 104116 / JCM 14847 / LMG 12228 / 1C / PRS 101 / PAO1)	GLYA2_PSEAE	UPI000012B4E7	cytoplasm [GO:0005737]; cytosol [GO:0005829]; glycine hydroxymethyltransferase activity [GO:0004372]; pyridoxal phosphate binding [GO:0030170]; glycine biosynthetic process from serine [GO:0019264]; tetrahydrofolate interconversion [GO:0035999]; tetrahydrofolate metabolic process [GO:0046653]	GO:0004372; GO:0005737; GO:0005829; GO:0019264; GO:0030170; GO:0035999; GO:0046653
TRINITY_DN40614_c0_g1_i1	1	14196	4.01038e-97	0.810707	Upregulated	SA-C vs SA	PUR3_ECOLI	Mucin-19 (MUC-19)	MUC19			extracellular region [GO:0005576]; Golgi lumen [GO:0005796]; plasma membrane [GO:0005886]			MUC19		FUNCTION: May function in ocular mucus homeostasis. {ECO:0000269|PubMed:18184611}.	Homo sapiens (Human)	MUC19_HUMAN	UPI00021EA062	extracellular region [GO:0005576]; Golgi lumen [GO:0005796]; plasma membrane [GO:0005886]	GO:0005576; GO:0005796; GO:0005886
TRINITY_DN31030_c0_g1_i1	20	31976	5.63082e-107	0.623618	Upregulated	SA-C vs SA	PTSN_PSEAE	Bacteriohemerythrin	PSPA7_3599				iron ion binding [GO:0005506]; oxygen carrier activity [GO:0005344]				FUNCTION: Oxygen-binding protein. May be involved in a storage mechanism or for delivery to oxygen-requiring enzymes. The oxygen-binding site contains two iron atoms. {ECO:0000255|HAMAP-Rule:MF_00556}.	Pseudomonas aeruginosa (strain PA7)	HEMTB_PSEA7	UPI0000D7316F	iron ion binding [GO:0005506]; oxygen carrier activity [GO:0005344]	GO:0005344; GO:0005506
TRINITY_DN951_c1_g5_i1	969	1	2.77891e-140	-0.59753	Downregulated	SA-C vs SA	PTOCB_BACSU	Flagellar brake protein YcgR (Cyclic di-GMP binding protein YcgR)	ycgR PP_4397		bacterial-type flagellum-dependent cell motility [GO:0071973]; regulation of bacterial-type flagellum-dependent cell motility by regulation of motor speed [GO:0071945]	bacterial-type flagellum basal body [GO:0009425]	cyclic-di-GMP binding [GO:0035438]		ycgR		FUNCTION: Acts as a flagellar brake, regulating swimming and swarming in a bis-(3'-5') cyclic diguanylic acid (c-di-GMP)-dependent manner. Increasing levels of c-di-GMP lead to decreased motility (By similarity). Binds c-di-GMP with a dissociation constant of 165 nM. Binds 2 intercalated (c-di-GMP) dimers per subunit. {ECO:0000250}.	Pseudomonas putida (strain ATCC 47054 / DSM 6125 / CFBP 8728 / NCIMB 11950 / KT2440)	YCGR_PSEPK	UPI000000FA40	bacterial-type flagellum basal body [GO:0009425]; cyclic-di-GMP binding [GO:0035438]; bacterial-type flagellum-dependent cell motility [GO:0071973]; regulation of bacterial-type flagellum-dependent cell motility by regulation of motor speed [GO:0071945]	GO:0009425; GO:0035438; GO:0071945; GO:0071973
TRINITY_DN6421_c0_g2_i1	13	12967	1.04139e-77	0.583197	Upregulated	SA-C vs SA	PTH_PSEAE	Internal scaffolding protein B (EC 3.4.-.-) (Scaffolding protein B) (GPB)	B		proteolysis [GO:0006508]; viral scaffold assembly and maintenance [GO:0046807]	host cell cytoplasm [GO:0030430]; viral scaffold [GO:0046806]	peptidase activity [GO:0008233]		B	3.4.-.-	FUNCTION: Participates in the assembly of the viral procapsid in the cytoplasm. Forms first a 12S pre-assembly complex with protein H, and F and G pentamers, then twelve 12S complexes are joined by the D protein to form the procapsid. Internal scaffold protein B is released from the procapsid upon genome packaging (PubMed:159449). Autoproteolytic activity cleaves protein B and probably facilitate…	Enterobacteria phage phiX174 (Isolate Sanger) (Bacteriophage phi-X174)	SCAFB_BPPHS	UPI0000110560	host cell cytoplasm [GO:0030430]; viral scaffold [GO:0046806]; peptidase activity [GO:0008233]; proteolysis [GO:0006508]; viral scaffold assembly and maintenance [GO:0046807]	GO:0006508; GO:0008233; GO:0030430; GO:0046806; GO:0046807
TRINITY_DN33822_c0_g1_i1	8	12	5.5166e-35	0.0263317	Upregulated	SA-C vs SA	PTGA_SALTI	Ketol-acid reductoisomerase (NADP(+)) (KARI) (EC 1.1.1.86) (Acetohydroxy-acid isomeroreductase) (AHIR) (Alpha-keto-beta-hydroxylacyl reductoisomerase) (Ketol-acid reductoisomerase type 1) (Ketol-acid reductoisomerase type I)	ilvC SAR2143	PATHWAY: Amino-acid biosynthesis; L-isoleucine biosynthesis; L-isoleucine from 2-oxobutanoate: step 2/4. {ECO:0000255|HAMAP-Rule:MF_00435}.; PATHWAY: Amino-acid biosynthesis; L-valine biosynthesis; L-valine from pyruvate: step 2/4. {ECO:0000255|HAMAP-Rule:MF_00435}.	isoleucine biosynthetic process [GO:0009097]; L-valine biosynthetic process [GO:0009099]	cytosol [GO:0005829]	ketol-acid reductoisomerase activity [GO:0004455]; magnesium ion binding [GO:0000287]; NADP binding [GO:0050661]		ilvC	1.1.1.86	FUNCTION: Involved in the biosynthesis of branched-chain amino acids (BCAA). Catalyzes an alkyl-migration followed by a ketol-acid reduction of (S)-2-acetolactate (S2AL) to yield (R)-2,3-dihydroxy-isovalerate. In the isomerase reaction, S2AL is rearranged via a Mg-dependent methyl migration to produce 3-hydroxy-3-methyl-2-ketobutyrate (HMKB). In the reductase reaction, this 2-ketoacid undergoes a…	Staphylococcus aureus (strain MRSA252)	ILVC_STAAR	UPI00000D7826	cytosol [GO:0005829]; ketol-acid reductoisomerase activity [GO:0004455]; magnesium ion binding [GO:0000287]; NADP binding [GO:0050661]; isoleucine biosynthetic process [GO:0009097]; L-valine biosynthetic process [GO:0009099]	GO:0000287; GO:0004455; GO:0005829; GO:0009097; GO:0009099; GO:0050661
TRINITY_DN840_c0_g1_i3	9808.47	27	3.96766e-241	-0.513475	Downregulated	SA-C vs SA	PTG3C_STAAW	Uncharacterized protein PA1579	PA1579				lipid binding [GO:0008289]				FUNCTION: May play a role in the interaction of the bacterium with animal cells.	Pseudomonas aeruginosa (strain ATCC 15692 / DSM 22644 / CIP 104116 / JCM 14847 / LMG 12228 / 1C / PRS 101 / PAO1)	Y1579_PSEAE	UPI000013AD81	lipid binding [GO:0008289]	GO:0008289
TRINITY_DN152_c0_g1_i1	67046	7	0	-0.793808	Downregulated	SA-C vs SA	PT1_STAAW	Transcriptional regulatory protein CreB	creB yjjE b4398 JW4361		positive regulation of DNA-templated transcription [GO:0045893]; regulation of DNA-templated transcription [GO:0006355]	cytosol [GO:0005829]; protein-DNA complex [GO:0032993]	cis-regulatory region sequence-specific DNA binding [GO:0000987]; identical protein binding [GO:0042802]; phosphorelay response regulator activity [GO:0000156]; transcription cis-regulatory region binding [GO:0000976]		creB		FUNCTION: Member of the two-component regulatory system CreC/CreB involved in catabolic regulation.	Escherichia coli (strain K12)	CREB_ECOLI	UPI000012841C	cytosol [GO:0005829]; protein-DNA complex [GO:0032993]; cis-regulatory region sequence-specific DNA binding [GO:0000987]; identical protein binding [GO:0042802]; phosphorelay response regulator activity [GO:0000156]; transcription cis-regulatory region binding [GO:0000976]; positive regulation of DNA-templated transcription [GO:0045893]; regulation of DNA-templated transcription [GO:0006355]	GO:0000156; GO:0000976; GO:0000987; GO:0005829; GO:0006355; GO:0032993; GO:0042802; GO:0045893
TRINITY_DN1837_c0_g2_i2	1779.76	2.1	7.44082e-167	-0.586053	Downregulated	SA-C vs SA	PSUG_STAAW	Di/tripeptide transport ATP-binding protein DppD (EC 7.4.2.9)	dppD PA14_58470		peptide transport [GO:0015833]; protein transport [GO:0015031]	plasma membrane [GO:0005886]	ATP binding [GO:0005524]; ATP hydrolysis activity [GO:0016887]		dppD	7.4.2.9	FUNCTION: Part of the ABC transporter DppABCDF involved in the uptake of various di/tripeptides (PubMed:25338022). Is also involved in the uptake of phaseolotoxin, a toxic tripeptide inhibiting the enzyme ornithine carbamoyltransferase (PubMed:25338022). Responsible for energy coupling to the transport system (Probable). {ECO:0000269|PubMed:25338022, ECO:0000305}.	Pseudomonas aeruginosa (strain UCBPP-PA14)	DPPD_PSEAB	UPI00003963B2	plasma membrane [GO:0005886]; ATP binding [GO:0005524]; ATP hydrolysis activity [GO:0016887]; peptide transport [GO:0015833]; protein transport [GO:0015031]	GO:0005524; GO:0005886; GO:0015031; GO:0015833; GO:0016887
TRINITY_DN1650_c0_g2_i1	8	2748	9.01912e-33	0.491866	Upregulated	SA-C vs SA	PSRP_PSEAE	C4-dicarboxylate TRAP transporter small permease protein DctQ	dctQ PA5168		C4-dicarboxylate transport [GO:0015740]	plasma membrane [GO:0005886]	transmembrane transporter activity [GO:0022857]		dctQ		FUNCTION: Part of the tripartite ATP-independent periplasmic (TRAP) transport system DctPQM involved in C4-dicarboxylates uptake. {ECO:0000269|PubMed:21725012}.	Pseudomonas aeruginosa (strain ATCC 15692 / DSM 22644 / CIP 104116 / JCM 14847 / LMG 12228 / 1C / PRS 101 / PAO1)	DCTQ_PSEAE	UPI00000C5F35	plasma membrane [GO:0005886]; transmembrane transporter activity [GO:0022857]; C4-dicarboxylate transport [GO:0015740]	GO:0005886; GO:0015740; GO:0022857
TRINITY_DN262_c0_g5_i1	1	7857	1.55134e-75	0.760026	Upregulated	SA-C vs SA	PRTE_DICCH	Sensor histidine kinase GacS (EC 2.7.13.3)	gacS lemA			plasma membrane [GO:0005886]	ATP binding [GO:0005524]; phosphorelay sensor kinase activity [GO:0000155]		gacS	2.7.13.3	FUNCTION: Member of the two-component regulatory system GacA/GacS which controls the expression of secondary metabolites and extracellular products. Activates GacA by phosphorylation (Probable). GacA acts (probably primarily) by activating expression of CsrA1 and CsrA2 antagonist small RNAs (sRNA) RsmX, RsmY and RsmZ which bind to and prevent translation repression by CsrA1 and CsrA2 (PubMed:1180…	Pseudomonas protegens (strain DSM 19095 / LMG 27888 / CFBP 6595 / CHA0)	GACS_PSEPH	UPI00000BAD9D	plasma membrane [GO:0005886]; ATP binding [GO:0005524]; phosphorelay sensor kinase activity [GO:0000155]	GO:0000155; GO:0005524; GO:0005886
TRINITY_DN6416_c0_g1_i1	15	7513	2.71879e-56	0.524178	Upregulated	SA-C vs SA	PRPB_CUPNE	L-2,3-diaminopropanoate--citrate ligase (EC 6.3.2.54) (Staphyloferrin B biosynthesis protein SbnE)	sbnE SAOUHSC_00079	PATHWAY: Siderophore biosynthesis. {ECO:0000269|PubMed:14688077, ECO:0000269|PubMed:19775248}.	siderophore biosynthetic process [GO:0019290]		acid-amino acid ligase activity [GO:0016881]; ATP binding [GO:0005524]		sbnE	6.3.2.54	FUNCTION: Catalyzes the synthesis of citryl-L-2,3-diaminopropionic acid from L-2,3-diaminopropionic acid (L-Dap) and citrate, the first step in staphyloferrin B biosynthesis. {ECO:0000269|PubMed:19775248}.	Staphylococcus aureus (strain NCTC 8325 / PS 47)	SBNE_STAA8	UPI00000D9BAC	acid-amino acid ligase activity [GO:0016881]; ATP binding [GO:0005524]; siderophore biosynthetic process [GO:0019290]	GO:0005524; GO:0016881; GO:0019290
TRINITY_DN32847_c0_g1_i1	7.11	5	1.45979e-49	-0.0385697	Downregulated	SA-C vs SA	PRIB_SALTY	Translation initiation factor IF-2	infB SPC_3357			cytosol [GO:0005829]	GTP binding [GO:0005525]; GTPase activity [GO:0003924]; guanosine tetraphosphate binding [GO:0097216]; translation initiation factor activity [GO:0003743]		infB		FUNCTION: One of the essential components for the initiation of protein synthesis. Protects formylmethionyl-tRNA from spontaneous hydrolysis and promotes its binding to the 30S ribosomal subunits. Also involved in the hydrolysis of GTP during the formation of the 70S ribosomal complex. {ECO:0000255|HAMAP-Rule:MF_00100}.	Salmonella paratyphi C (strain RKS4594)	IF2_SALPC	UPI000012D2E8	cytosol [GO:0005829]; GTP binding [GO:0005525]; GTPase activity [GO:0003924]; guanosine tetraphosphate binding [GO:0097216]; translation initiation factor activity [GO:0003743]	GO:0003743; GO:0003924; GO:0005525; GO:0005829; GO:0097216
TRINITY_DN37522_c0_g1_i1	1	1	3.94049e-08	-0.00840656	Downregulated	SA-C vs SA	PR20B_HUMAN	S-adenosylmethionine synthase (AdoMet synthase) (EC 2.5.1.6) (MAT) (Methionine adenosyltransferase)	metK PA0546	PATHWAY: Amino-acid biosynthesis; S-adenosyl-L-methionine biosynthesis; S-adenosyl-L-methionine from L-methionine: step 1/1. {ECO:0000255|HAMAP-Rule:MF_00086}.	one-carbon metabolic process [GO:0006730]; S-adenosylmethionine biosynthetic process [GO:0006556]	cytosol [GO:0005829]	ATP binding [GO:0005524]; magnesium ion binding [GO:0000287]; methionine adenosyltransferase activity [GO:0004478]		metK	2.5.1.6	FUNCTION: Catalyzes the formation of S-adenosylmethionine (AdoMet) from methionine and ATP. The overall synthetic reaction is composed of two sequential steps, AdoMet formation and the subsequent tripolyphosphate hydrolysis which occurs prior to release of AdoMet from the enzyme. {ECO:0000255|HAMAP-Rule:MF_00086}.	Pseudomonas aeruginosa (strain ATCC 15692 / DSM 22644 / CIP 104116 / JCM 14847 / LMG 12228 / 1C / PRS 101 / PAO1)	METK_PSEAE	UPI000012EFD0	cytosol [GO:0005829]; ATP binding [GO:0005524]; magnesium ion binding [GO:0000287]; methionine adenosyltransferase activity [GO:0004478]; one-carbon metabolic process [GO:0006730]; S-adenosylmethionine biosynthetic process [GO:0006556]	GO:0000287; GO:0004478; GO:0005524; GO:0005829; GO:0006556; GO:0006730
TRINITY_DN3533_c1_g3_i1	6	6221	1.22481e-59	0.586514	Upregulated	SA-C vs SA	PQQC_PSEAE	Guanylate kinase (EC 2.7.4.8) (GMP kinase)	gmk PA5336			cytosol [GO:0005829]	ATP binding [GO:0005524]; guanylate kinase activity [GO:0004385]		gmk	2.7.4.8	FUNCTION: Essential for recycling GMP and indirectly, cGMP. {ECO:0000250}.	Pseudomonas aeruginosa (strain ATCC 15692 / DSM 22644 / CIP 104116 / JCM 14847 / LMG 12228 / 1C / PRS 101 / PAO1)	KGUA_PSEAE	UPI000012DDEE	cytosol [GO:0005829]; ATP binding [GO:0005524]; guanylate kinase activity [GO:0004385]	GO:0004385; GO:0005524; GO:0005829
TRINITY_DN35892_c0_g1_i1	1	2572	2.37247e-41	0.664351	Upregulated	SA-C vs SA	PPIB_ECOLI	Thymidylate kinase (EC 2.7.4.9) (dTMP kinase)	tmk PLES_21011		dTDP biosynthetic process [GO:0006233]; dTTP biosynthetic process [GO:0006235]; dUDP biosynthetic process [GO:0006227]	cytosol [GO:0005829]	ATP binding [GO:0005524]; thymidylate kinase activity [GO:0004798]		tmk	2.7.4.9	FUNCTION: Phosphorylation of dTMP to form dTDP in both de novo and salvage pathways of dTTP synthesis. {ECO:0000255|HAMAP-Rule:MF_00165}.	Pseudomonas aeruginosa (strain LESB58)	KTHY_PSEA8	UPI000012E0FF	cytosol [GO:0005829]; ATP binding [GO:0005524]; thymidylate kinase activity [GO:0004798]; dTDP biosynthetic process [GO:0006233]; dTTP biosynthetic process [GO:0006235]; dUDP biosynthetic process [GO:0006227]	GO:0004798; GO:0005524; GO:0005829; GO:0006227; GO:0006233; GO:0006235
TRINITY_DN2608_c0_g1_i2	610	1	5.84744e-120	-0.557879	Downregulated	SA-C vs SA	PPI1_STAAM	Glucose-6-phosphate 1-dehydrogenase (G6PD) (EC 1.1.1.363) (Glucose-6-phosphate dehydrogenase (NAD(P)(+)))	zwf PA3183	PATHWAY: Carbohydrate degradation; pentose phosphate pathway; D-ribulose 5-phosphate from D-glucose 6-phosphate (oxidative stage): step 1/3. {ECO:0000255|HAMAP-Rule:MF_00966}.	glucose metabolic process [GO:0006006]; pentose-phosphate shunt, oxidative branch [GO:0009051]	cytosol [GO:0005829]	glucose-6-phosphate dehydrogenase activity [GO:0004345]; NADP binding [GO:0050661]		zwf	1.1.1.363	FUNCTION: Catalyzes the oxidation of glucose 6-phosphate to 6-phosphogluconolactone. Can utilize either NADP(+) or NAD(+). {ECO:0000255|HAMAP-Rule:MF_00966, ECO:0000269|PubMed:9537370}.	Pseudomonas aeruginosa (strain ATCC 15692 / DSM 22644 / CIP 104116 / JCM 14847 / LMG 12228 / 1C / PRS 101 / PAO1)	G6PD_PSEAE	UPI000012AF2D	cytosol [GO:0005829]; glucose-6-phosphate dehydrogenase activity [GO:0004345]; NADP binding [GO:0050661]; glucose metabolic process [GO:0006006]; pentose-phosphate shunt, oxidative branch [GO:0009051]	GO:0004345; GO:0005829; GO:0006006; GO:0009051; GO:0050661
TRINITY_DN2932_c0_g2_i2	3	2	1.58075e-31	-0.0431448	Downregulated	SA-C vs SA	POTEH_HUMAN	Glutathione peroxidase (EC 1.11.1.9)	gpwA		cellular response to oxidative stress [GO:0034599]	periplasmic space [GO:0042597]	glutathione peroxidase activity [GO:0004602]		gpwA	1.11.1.9		Pseudomonas wisconsinensis	GPWA_PSEWI	UPI000012BA46	periplasmic space [GO:0042597]; glutathione peroxidase activity [GO:0004602]; cellular response to oxidative stress [GO:0034599]	GO:0004602; GO:0034599; GO:0042597
TRINITY_DN20118_c0_g3_i2	1	10676	1.34113e-86	0.786293	Upregulated	SA-C vs SA	POTA2_PSEAE	Probable GTP-binding protein EngB	engB SAS1602		division septum assembly [GO:0000917]	cytosol [GO:0005829]	GTP binding [GO:0005525]; metal ion binding [GO:0046872]		engB		FUNCTION: Necessary for normal cell division and for the maintenance of normal septation. {ECO:0000255|HAMAP-Rule:MF_00321}.	Staphylococcus aureus (strain MSSA476)	ENGB_STAAS	UPI0000054C1F	cytosol [GO:0005829]; GTP binding [GO:0005525]; metal ion binding [GO:0046872]; division septum assembly [GO:0000917]	GO:0000917; GO:0005525; GO:0005829; GO:0046872
TRINITY_DN219_c0_g3_i1	7	4170	1.2282e-45	0.539036	Upregulated	SA-C vs SA	PNTAA_RHORU	Enoyl-[acyl-carrier-protein] reductase [NADH] (ENR) (EC 1.3.1.9)	fabV PA14_25900	PATHWAY: Lipid metabolism; fatty acid biosynthesis. {ECO:0000255|HAMAP-Rule:MF_01838}.	fatty acid biosynthetic process [GO:0006633]		enoyl-[acyl-carrier-protein] reductase (NADH) activity [GO:0004318]; NAD binding [GO:0051287]; trans-2-enoyl-CoA reductase (NADH) activity [GO:0050343]		fabV	1.3.1.9	FUNCTION: Involved in the final reduction of the elongation cycle of fatty acid synthesis (FAS II). Catalyzes the reduction of a carbon-carbon double bond in an enoyl moiety that is covalently linked to an acyl carrier protein (ACP). {ECO:0000255|HAMAP-Rule:MF_01838}.	Pseudomonas aeruginosa (strain UCBPP-PA14)	FABV_PSEAB	UPI00000C58A0	enoyl-[acyl-carrier-protein] reductase (NADH) activity [GO:0004318]; NAD binding [GO:0051287]; trans-2-enoyl-CoA reductase (NADH) activity [GO:0050343]; fatty acid biosynthetic process [GO:0006633]	GO:0004318; GO:0006633; GO:0050343; GO:0051287
TRINITY_DN45472_c0_g1_i1	6553	3	1.36621e-223	-0.667167	Downregulated	SA-C vs SA	PNCA_BACSU	Probable K(+)/H(+) antiporter subunit C (pH adaptation potassium efflux system protein C) (Pha system subunit C)	phaC phaC1 R02911 SMc03180		potassium ion transport [GO:0006813]; proton transmembrane transport [GO:1902600]	plasma membrane [GO:0005886]	antiporter activity [GO:0015297]; monoatomic cation transmembrane transporter activity [GO:0008324]	SMc03180	phaC		FUNCTION: Part of a K(+) efflux system which is required for the adaptation of R.meliloti to alkaline pH as well as for the infection process during symbiotic nodule development.	Rhizobium meliloti (strain 1021) (Ensifer meliloti) (Sinorhizobium meliloti)	PHAC1_RHIME	UPI00000D4722	plasma membrane [GO:0005886]; antiporter activity [GO:0015297]; monoatomic cation transmembrane transporter activity [GO:0008324]; potassium ion transport [GO:0006813]; proton transmembrane transport [GO:1902600]	GO:0005886; GO:0006813; GO:0008324; GO:0015297; GO:1902600
TRINITY_DN541_c0_g1_i2	22	20799	6.1838e-88	0.578606	Upregulated	SA-C vs SA	PK21A_PSEAE	Large ribosomal subunit protein eL13 (60S ribosomal protein L13) (Breast basic conserved protein 1)	RPL13 BBC1 OK/SW-cl.46		blastocyst development [GO:0001824]; bone development [GO:0060348]; cytoplasmic translation [GO:0002181]; translation [GO:0006412]	cytoplasm [GO:0005737]; cytosol [GO:0005829]; cytosolic large ribosomal subunit [GO:0022625]; cytosolic ribosome [GO:0022626]; endoplasmic reticulum [GO:0005783]; membrane [GO:0016020]; nucleolus [GO:0005730]; nucleus [GO:0005634]; synapse [GO:0045202]	RNA binding [GO:0003723]; structural constituent of ribosome [GO:0003735]	OK/SW-cl.46	RPL13		FUNCTION: Component of the ribosome, a large ribonucleoprotein complex responsible for the synthesis of proteins in the cell (PubMed:23636399, PubMed:31630789, PubMed:32669547). The small ribosomal subunit (SSU) binds messenger RNAs (mRNAs) and translates the encoded message by selecting cognate aminoacyl-transfer RNA (tRNA) molecules (Probable). The large subunit (LSU) contains the ribosomal cat…	Homo sapiens (Human)	RL13_HUMAN	UPI0000001228	cytoplasm [GO:0005737]; cytosol [GO:0005829]; cytosolic large ribosomal subunit [GO:0022625]; cytosolic ribosome [GO:0022626]; endoplasmic reticulum [GO:0005783]; membrane [GO:0016020]; nucleolus [GO:0005730]; nucleus [GO:0005634]; synapse [GO:0045202]; RNA binding [GO:0003723]; structural constituent of ribosome [GO:0003735]; blastocyst development [GO:0001824]; bone development [GO:0060348]; cy…	GO:0001824; GO:0002181; GO:0003723; GO:0003735; GO:0005634; GO:0005730; GO:0005737; GO:0005783; GO:0005829; GO:0006412; GO:0016020; GO:0022625; GO:0022626; GO:0045202; GO:0060348
TRINITY_DN37_c0_g4_i3	1	7761	4.48271e-75	0.758973	Upregulated	SA-C vs SA	PITA_ECO57	Maleylacetoacetate isomerase (MAAI) (EC 5.2.1.2)	maiA PA2007	PATHWAY: Amino-acid degradation; L-phenylalanine degradation; acetoacetate and fumarate from L-phenylalanine: step 5/6.	glutathione metabolic process [GO:0006749]; L-phenylalanine catabolic process [GO:0006559]; tyrosine catabolic process [GO:0006572]	cytoplasm [GO:0005737]	glutathione transferase activity [GO:0004364]; maleylacetoacetate isomerase activity [GO:0016034]		maiA	5.2.1.2		Pseudomonas aeruginosa (strain ATCC 15692 / DSM 22644 / CIP 104116 / JCM 14847 / LMG 12228 / 1C / PRS 101 / PAO1)	MAAI_PSEAE	UPI000012EAFB	cytoplasm [GO:0005737]; glutathione transferase activity [GO:0004364]; maleylacetoacetate isomerase activity [GO:0016034]; glutathione metabolic process [GO:0006749]; L-phenylalanine catabolic process [GO:0006559]; tyrosine catabolic process [GO:0006572]	GO:0004364; GO:0005737; GO:0006559; GO:0006572; GO:0006749; GO:0016034
TRINITY_DN256_c0_g5_i1	17	15057	1.3305e-79	0.573017	Upregulated	SA-C vs SA	PILH_PSEAE	Cell division ATP-binding protein FtsE	ftsE SF3481 S4282		cell division [GO:0051301]	plasma membrane [GO:0005886]	ATP binding [GO:0005524]; ATP hydrolysis activity [GO:0016887]; transmembrane transporter activity [GO:0022857]		ftsE		FUNCTION: Part of the ABC transporter FtsEX involved in cellular division. Important for assembly or stability of the septal ring. {ECO:0000250|UniProtKB:P0A9R7}.	Shigella flexneri	FTSE_SHIFL	UPI000012ACC2	plasma membrane [GO:0005886]; ATP binding [GO:0005524]; ATP hydrolysis activity [GO:0016887]; transmembrane transporter activity [GO:0022857]; cell division [GO:0051301]	GO:0005524; GO:0005886; GO:0016887; GO:0022857; GO:0051301
TRINITY_DN1325_c0_g2_i1	9	26024	1.8925e-109	0.674384	Upregulated	SA-C vs SA	PILB_PSEAE	Cyclic diguanosine monophosphate-binding protein PA4608 (c-di-GMP-binding protein PA4608) (Pilz domain-containing protein PA4608)	PA4608				cyclic-di-GMP binding [GO:0035438]				FUNCTION: Binds the second messenger bis-(3'-5') cyclic dimeric guanosine monophosphate (c-di-GMP). Can bind two c-di-GMP molecules per monomer. May play a role in bacterial second-messenger regulated processes. Binding to c-di-GMP induces a conformational change of the C- and N-termini resulting in the exposure of a highly negative surface on one side of the protein to a possible effector protei…	Pseudomonas aeruginosa (strain ATCC 15692 / DSM 22644 / CIP 104116 / JCM 14847 / LMG 12228 / 1C / PRS 101 / PAO1)	CDGBP_PSEAE	UPI00000C5D87	cyclic-di-GMP binding [GO:0035438]	GO:0035438
TRINITY_DN70_c1_g2_i1	6	6770	2.23455e-62	0.59376	Upregulated	SA-C vs SA	PHZM_PSEAE	Threonine--tRNA ligase (EC 6.1.1.3) (Threonyl-tRNA synthetase) (ThrRS)	thrS STM1333		threonyl-tRNA aminoacylation [GO:0006435]	cytosol [GO:0005829]	ATP binding [GO:0005524]; metal ion binding [GO:0046872]; threonine-tRNA ligase activity [GO:0004829]; tRNA binding [GO:0000049]		thrS	6.1.1.3	FUNCTION: Catalyzes the attachment of threonine to tRNA(Thr) in a two-step reaction: L-threonine is first activated by ATP to form Thr-AMP and then transferred to the acceptor end of tRNA(Thr). Also edits incorrectly charged L-seryl-tRNA(Thr). {ECO:0000255|HAMAP-Rule:MF_00184}.	Salmonella typhimurium (strain LT2 / SGSC1412 / ATCC 700720)	SYT_SALTY	UPI00001366D2	cytosol [GO:0005829]; ATP binding [GO:0005524]; metal ion binding [GO:0046872]; threonine-tRNA ligase activity [GO:0004829]; tRNA binding [GO:0000049]; threonyl-tRNA aminoacylation [GO:0006435]	GO:0000049; GO:0004829; GO:0005524; GO:0005829; GO:0006435; GO:0046872
TRINITY_DN608_c1_g1_i1	20	26341	4.57952e-99	0.60701	Upregulated	SA-C vs SA	PHOP_PSEAE	Small ribosomal subunit protein uS2 (30S ribosomal protein S2)	rpsB PA14_17060		translation [GO:0006412]	cytosolic small ribosomal subunit [GO:0022627]	structural constituent of ribosome [GO:0003735]		rpsB			Pseudomonas aeruginosa (strain UCBPP-PA14)	RS2_PSEAB	UPI0000134F14	cytosolic small ribosomal subunit [GO:0022627]; structural constituent of ribosome [GO:0003735]; translation [GO:0006412]	GO:0003735; GO:0006412; GO:0022627
TRINITY_DN4107_c1_g2_i1	1036	1	3.28427e-143	-0.603258	Downregulated	SA-C vs SA	PHNC_STAAN	Nitric oxide synthase oxygenase (EC 1.14.14.47) (NOSoxy-like protein) (SANOS)	nos SAS1838		nitric oxide biosynthetic process [GO:0006809]		heme binding [GO:0020037]; metal ion binding [GO:0046872]; nitric-oxide synthase activity [GO:0004517]		nos	1.14.14.47	FUNCTION: Catalyzes the production of nitric oxide. {ECO:0000250|UniProtKB:O34453}.	Staphylococcus aureus (strain MSSA476)	NOSO_STAAS	UPI00000D76C2	heme binding [GO:0020037]; metal ion binding [GO:0046872]; nitric-oxide synthase activity [GO:0004517]; nitric oxide biosynthetic process [GO:0006809]	GO:0004517; GO:0006809; GO:0020037; GO:0046872
TRINITY_DN6199_c0_g2_i1	45	46454	2.28259e-105	0.58614	Upregulated	SA-C vs SA	PHNB_PSEAE	Small ribosomal subunit biogenesis GTPase RsgA (EC 3.6.1.-)	rsgA PA4952		ribosomal small subunit biogenesis [GO:0042274]	cytoplasm [GO:0005737]	GTP binding [GO:0005525]; GTPase activity [GO:0003924]; metal ion binding [GO:0046872]; rRNA binding [GO:0019843]		rsgA	3.6.1.-	FUNCTION: One of several proteins that assist in the late maturation steps of the functional core of the 30S ribosomal subunit. Helps release RbfA from mature subunits. May play a role in the assembly of ribosomal proteins into the subunit. Circularly permuted GTPase that catalyzes slow GTP hydrolysis, GTPase activity is stimulated by the 30S ribosomal subunit. {ECO:0000255|HAMAP-Rule:MF_01820}.	Pseudomonas aeruginosa (strain ATCC 15692 / DSM 22644 / CIP 104116 / JCM 14847 / LMG 12228 / 1C / PRS 101 / PAO1)	RSGA_PSEAE	UPI00000C5E8F	cytoplasm [GO:0005737]; GTP binding [GO:0005525]; GTPase activity [GO:0003924]; metal ion binding [GO:0046872]; rRNA binding [GO:0019843]; ribosomal small subunit biogenesis [GO:0042274]	GO:0003924; GO:0005525; GO:0005737; GO:0019843; GO:0042274; GO:0046872
TRINITY_DN1262_c0_g5_i1	47	48717	2.34579e-106	0.586489	Upregulated	SA-C vs SA	PHAC1_RHIME	Acetyltransferase PA2578 (EC 2.3.1.-) (GCN5-related N-acetyltransferase) (GNAT)	PA2578				acyltransferase activity, transferring groups other than amino-acyl groups [GO:0016747]			2.3.1.-	FUNCTION: Catalyzes the transfer of an acetyl group from acetyl coenzyme A (AcCoA) to an acceptor substrate and releases both CoA and the acetylated product. It prefers the antibiotic chloramphenicol. {ECO:0000269|PubMed:23184347}.	Pseudomonas aeruginosa (strain ATCC 15692 / DSM 22644 / CIP 104116 / JCM 14847 / LMG 12228 / 1C / PRS 101 / PAO1)	ATSE2_PSEAE	UPI00000C574C	acyltransferase activity, transferring groups other than amino-acyl groups [GO:0016747]	GO:0016747
TRINITY_DN45_c0_g1_i2	4.67	9327.76	6.98781e-75	0.642688	Upregulated	SA-C vs SA	PGSA_PSEFL	Aspartate 1-decarboxylase (EC 4.1.1.11) (Aspartate alpha-decarboxylase) [Cleaved into: Aspartate 1-decarboxylase beta chain; Aspartate 1-decarboxylase alpha chain]	panD PA14_62600	PATHWAY: Cofactor biosynthesis; (R)-pantothenate biosynthesis; beta-alanine from L-aspartate: step 1/1. {ECO:0000255|HAMAP-Rule:MF_00446}.	alanine biosynthetic process [GO:0006523]; pantothenate biosynthetic process [GO:0015940]	cytosol [GO:0005829]	aspartate 1-decarboxylase activity [GO:0004068]		panD	4.1.1.11	FUNCTION: Catalyzes the pyruvoyl-dependent decarboxylation of aspartate to produce beta-alanine. {ECO:0000255|HAMAP-Rule:MF_00446}.	Pseudomonas aeruginosa (strain UCBPP-PA14)	PAND_PSEAB	UPI0000396E61	cytosol [GO:0005829]; aspartate 1-decarboxylase activity [GO:0004068]; alanine biosynthetic process [GO:0006523]; pantothenate biosynthetic process [GO:0015940]	GO:0004068; GO:0005829; GO:0006523; GO:0015940
TRINITY_DN1646_c0_g1_i4	218923	246	0	-0.590238	Downregulated	SA-C vs SA	PFLA_STAAW	Inducible ornithine decarboxylase (EC 4.1.1.17)	speF b0693 JW0680	PATHWAY: Amine and polyamine biosynthesis; putrescine biosynthesis via L-ornithine pathway; putrescine from L-ornithine: step 1/1.	cellular response to acidic pH [GO:0071468]; putrescine biosynthetic process from ornithine [GO:0033387]; spermidine biosynthetic process [GO:0008295]	cytosol [GO:0005829]	ornithine decarboxylase activity [GO:0004586]; protein homodimerization activity [GO:0042803]; pyridoxal phosphate binding [GO:0030170]		speF	4.1.1.17	FUNCTION: The first enzyme leading to putrescine and thus polyamine synthesis. {ECO:0000305}.	Escherichia coli (strain K12)	DCOS_ECOLI	UPI0000128FF8	cytosol [GO:0005829]; ornithine decarboxylase activity [GO:0004586]; protein homodimerization activity [GO:0042803]; pyridoxal phosphate binding [GO:0030170]; cellular response to acidic pH [GO:0071468]; putrescine biosynthetic process from ornithine [GO:0033387]; spermidine biosynthetic process [GO:0008295]	GO:0004586; GO:0005829; GO:0008295; GO:0030170; GO:0033387; GO:0042803; GO:0071468
TRINITY_DN702_c0_g1_i4	436.28	1	4.18556e-105	-0.529163	Downregulated	SA-C vs SA	PERR_STAAU	Tyrosine--tRNA ligase (EC 6.1.1.1) (Tyrosyl-tRNA synthetase) (TyrRS)	tyrS SAV1729		tyrosyl-tRNA aminoacylation [GO:0006437]	cytosol [GO:0005829]	ATP binding [GO:0005524]; RNA binding [GO:0003723]; tyrosine-tRNA ligase activity [GO:0004831]		tyrS	6.1.1.1	FUNCTION: Catalyzes the attachment of tyrosine to tRNA(Tyr) in a two-step reaction: tyrosine is first activated by ATP to form Tyr-AMP and then transferred to the acceptor end of tRNA(Tyr). {ECO:0000255|HAMAP-Rule:MF_02006}.	Staphylococcus aureus (strain Mu50 / ATCC 700699)	SYY_STAAM	UPI000002E8ED	cytosol [GO:0005829]; ATP binding [GO:0005524]; RNA binding [GO:0003723]; tyrosine-tRNA ligase activity [GO:0004831]; tyrosyl-tRNA aminoacylation [GO:0006437]	GO:0003723; GO:0004831; GO:0005524; GO:0005829; GO:0006437
TRINITY_DN9797_c0_g3_i1	1	3153	1.16048e-46	0.6818	Upregulated	SA-C vs SA	PDXY_PSEAE	AsmA family protein YhjG	yhjG yhjF b3524 JW3492		regulation of protein targeting to membrane [GO:0090313]	plasma membrane [GO:0005886]			yhjG			Escherichia coli (strain K12)	YHJG_ECOLI	UPI00005EE9D4	plasma membrane [GO:0005886]; regulation of protein targeting to membrane [GO:0090313]	GO:0005886; GO:0090313
TRINITY_DN4087_c0_g1_i1	1304.06	1	2.8441e-153	-0.622973	Downregulated	SA-C vs SA	PDXS_STAAS	N-carbamoylputrescine amidase (EC 3.5.1.53) (Nitrilase-like protein 1)	CPA NLP1 At2g27450 F10A12.13	PATHWAY: Amine and polyamine biosynthesis; putrescine biosynthesis via agmatine pathway; putrescine from N-carbamoylputrescine (amidase route): step 1/1. {ECO:0000305}.	putrescine biosynthetic process [GO:0009446]; putrescine biosynthetic process from arginine [GO:0033388]		N-carbamoylputrescine amidase activity [GO:0050126]	F10A12.13	CPA	3.5.1.53	FUNCTION: Involved in polyamine biosynthesis (PubMed:12435743). Catalyzes the hydrolysis of N-carbamoylputrescine to produce putrescine and ammonia (PubMed:12435743). {ECO:0000269|PubMed:12435743}.	Arabidopsis thaliana (Mouse-ear cress)	NILP1_ARATH	UPI00000AB101	N-carbamoylputrescine amidase activity [GO:0050126]; putrescine biosynthetic process [GO:0009446]; putrescine biosynthetic process from arginine [GO:0033388]	GO:0009446; GO:0033388; GO:0050126
TRINITY_DN25_c0_g1_i6	3.04	8203.89	1.37048e-73	0.668469	Upregulated	SA-C vs SA	PCHD_PSEAB	NAD(P)H-dependent FMN reductase PA1204 (EC 1.-.-.-)	PA1204			cytosol [GO:0005829]	FMN binding [GO:0010181]; FMN reductase (NADPH) activity [GO:0052873]; identical protein binding [GO:0042802]; NAD(P)H dehydrogenase (quinone) activity [GO:0003955]; oxidoreductase activity, acting on NAD(P)H, quinone or similar compound as acceptor [GO:0016655]; protein homodimerization activity [GO:0042803]			1.-.-.-	FUNCTION: Has NAD(P)H-dependent FMN reductase activity. {ECO:0000269|PubMed:16552139}.	Pseudomonas aeruginosa (strain ATCC 15692 / DSM 22644 / CIP 104116 / JCM 14847 / LMG 12228 / 1C / PRS 101 / PAO1)	FMNRE_PSEAE	UPI00000C52A7	cytosol [GO:0005829]; FMN binding [GO:0010181]; FMN reductase (NADPH) activity [GO:0052873]; identical protein binding [GO:0042802]; NAD(P)H dehydrogenase (quinone) activity [GO:0003955]; oxidoreductase activity, acting on NAD(P)H, quinone or similar compound as acceptor [GO:0016655]; protein homodimerization activity [GO:0042803]	GO:0003955; GO:0005829; GO:0010181; GO:0016655; GO:0042802; GO:0042803; GO:0052873
TRINITY_DN378_c2_g1_i1	8	12687	1.35462e-82	0.622923	Upregulated	SA-C vs SA	PCHB_PSEAE	Multidrug resistance operon repressor	mexR PA0424		negative regulation of DNA-templated transcription [GO:0045892]; negative regulation of protein secretion [GO:0050709]; negative regulation of transmembrane transport [GO:0034763]	protein-DNA complex [GO:0032993]	DNA-binding transcription repressor activity [GO:0001217]; identical protein binding [GO:0042802]; transcription cis-regulatory region binding [GO:0000976]		mexR		FUNCTION: Repressor of the mexAB-oprM multidrug resistance operon. Also represses its own expression. Many variants lead to increased expression of the mexAB-oprM operon.	Pseudomonas aeruginosa (strain ATCC 15692 / DSM 22644 / CIP 104116 / JCM 14847 / LMG 12228 / 1C / PRS 101 / PAO1)	MEXR_PSEAE	UPI000012F023	protein-DNA complex [GO:0032993]; DNA-binding transcription repressor activity [GO:0001217]; identical protein binding [GO:0042802]; transcription cis-regulatory region binding [GO:0000976]; negative regulation of DNA-templated transcription [GO:0045892]; negative regulation of protein secretion [GO:0050709]; negative regulation of transmembrane transport [GO:0034763]	GO:0000976; GO:0001217; GO:0032993; GO:0034763; GO:0042802; GO:0045892; GO:0050709
TRINITY_DN21820_c1_g1_i1	16	1	3.94049e-08	-0.245948	Downregulated	SA-C vs SA	PCDA8_HUMAN	3-oxoacyl-[acyl-carrier-protein] reductase [NADH] (EC 1.1.1.212) (Beta-ketoacyl CoA reductase) (FASII-like 3-oxoacyl-thioester reductase) (HMwFabG)	fabG4 Rv0242c	PATHWAY: Lipid metabolism; fatty acid metabolism. {ECO:0000305|PubMed:23163771}.	fatty acid metabolic process [GO:0006631]		3-oxoacyl-[acyl-carrier-protein] reductase (NADH) activity [GO:0047025]; oxidoreductase activity, acting on the CH-OH group of donors, NAD or NADP as acceptor [GO:0016616]		fabG4	1.1.1.212	FUNCTION: Catalyzes the NADH-dependent reduction of beta-ketoacyl derivatives (PubMed:19685079, PubMed:21081168, PubMed:23163771). Can accept the beta-oxo fatty acyl group covalently linked with CoA or ACP for catalysis (PubMed:23163771). Highly specific for NADH (PubMed:19685079, PubMed:21081168). Could be involved in fatty acid biosynthesis (Probable). {ECO:0000269|PubMed:19685079, ECO:0000269|…	Mycobacterium tuberculosis (strain ATCC 25618 / H37Rv)	FABG4_MYCTU	UPI00000D5FD7	3-oxoacyl-[acyl-carrier-protein] reductase (NADH) activity [GO:0047025]; oxidoreductase activity, acting on the CH-OH group of donors, NAD or NADP as acceptor [GO:0016616]; fatty acid metabolic process [GO:0006631]	GO:0006631; GO:0016616; GO:0047025
TRINITY_DN12015_c0_g1_i2	54.45	0.58	6.51625e-24	-0.397543	Downregulated	SA-C vs SA	PARC_STAAW	Arsenate reductase (EC 1.20.4.4)	arsC SAR0692		response to arsenic-containing substance [GO:0046685]	cytoplasm [GO:0005737]	arsenate reductase (thioredoxin) activity [GO:0030612]; protein tyrosine phosphatase activity [GO:0004725]		arsC	1.20.4.4	FUNCTION: Catalyzes the reduction of arsenate [As(V)] to arsenite [As(III)]. {ECO:0000255|HAMAP-Rule:MF_01624}.	Staphylococcus aureus (strain MRSA252)	ARSC_STAAR	UPI0000112452	cytoplasm [GO:0005737]; arsenate reductase (thioredoxin) activity [GO:0030612]; protein tyrosine phosphatase activity [GO:0004725]; response to arsenic-containing substance [GO:0046685]	GO:0004725; GO:0005737; GO:0030612; GO:0046685
TRINITY_DN602_c0_g4_i1	1092.95	2	1.47995e-145	-0.548458	Downregulated	SA-C vs SA	PAND_STAAB	Small ribosomal subunit protein uS12 (30S ribosomal protein S12)	rpsL SPA3314		translation [GO:0006412]	small ribosomal subunit [GO:0015935]	rRNA binding [GO:0019843]; structural constituent of ribosome [GO:0003735]; tRNA binding [GO:0000049]		rpsL		FUNCTION: With S4 and S5 plays an important role in translational accuracy. {ECO:0000255|HAMAP-Rule:MF_00403}.; FUNCTION: Interacts with and stabilizes bases of the 16S rRNA that are involved in tRNA selection in the A site and with the mRNA backbone. Located at the interface of the 30S and 50S subunits, it traverses the body of the 30S subunit contacting proteins on the other side and probably h…	Salmonella paratyphi A (strain ATCC 9150 / SARB42)	RS12_SALPA	UPI0000047C5B	small ribosomal subunit [GO:0015935]; rRNA binding [GO:0019843]; structural constituent of ribosome [GO:0003735]; tRNA binding [GO:0000049]; translation [GO:0006412]	GO:0000049; GO:0003735; GO:0006412; GO:0015935; GO:0019843
TRINITY_DN7118_c2_g2_i1	1	21981	9.19588e-114	0.848166	Upregulated	SA-C vs SA	PAND_PSEAB	Transaldolase (EC 2.2.1.2)	tal PLES_22761	PATHWAY: Carbohydrate degradation; pentose phosphate pathway; D-glyceraldehyde 3-phosphate and beta-D-fructose 6-phosphate from D-ribose 5-phosphate and D-xylulose 5-phosphate (non-oxidative stage): step 2/3. {ECO:0000255|HAMAP-Rule:MF_00492}.	carbohydrate metabolic process [GO:0005975]; pentose-phosphate shunt [GO:0006098]	cytosol [GO:0005829]	transaldolase activity [GO:0004801]		tal	2.2.1.2	FUNCTION: Transaldolase is important for the balance of metabolites in the pentose-phosphate pathway. {ECO:0000255|HAMAP-Rule:MF_00492}.	Pseudomonas aeruginosa (strain LESB58)	TAL_PSEA8	UPI000188FE69	cytosol [GO:0005829]; transaldolase activity [GO:0004801]; carbohydrate metabolic process [GO:0005975]; pentose-phosphate shunt [GO:0006098]	GO:0004801; GO:0005829; GO:0005975; GO:0006098
TRINITY_DN841_c0_g1_i3	15	7	3.94049e-08	-0.0737029	Downregulated	SA-C vs SA	PAL_SHIFL	Uncharacterized RNA methyltransferase MW1838 (EC 2.1.1.-)	MW1838		rRNA base methylation [GO:0070475]		4 iron, 4 sulfur cluster binding [GO:0051539]; metal ion binding [GO:0046872]; rRNA (uridine-C5-)-methyltransferase activity [GO:0070041]			2.1.1.-		Staphylococcus aureus (strain MW2)	Y1838_STAAW	UPI00000D9EE1	4 iron, 4 sulfur cluster binding [GO:0051539]; metal ion binding [GO:0046872]; rRNA (uridine-C5-)-methyltransferase activity [GO:0070041]; rRNA base methylation [GO:0070475]	GO:0046872; GO:0051539; GO:0070041; GO:0070475
TRINITY_DN91_c0_g5_i1	14	30096	6.00315e-110	0.648985	Upregulated	SA-C vs SA	PA1L_PSEAE	UPF0102 protein PA4424	PA4424				nucleic acid binding [GO:0003676]					Pseudomonas aeruginosa (strain ATCC 15692 / DSM 22644 / CIP 104116 / JCM 14847 / LMG 12228 / 1C / PRS 101 / PAO1)	Y4424_PSEAE	UPI0000139DDF	nucleic acid binding [GO:0003676]	GO:0003676
TRINITY_DN740_c1_g1_i1	1	1761	3.72617e-32	0.631897	Upregulated	SA-C vs SA	P2CDC_PSEAE	Phosphomethylpyrimidine synthase (EC 4.1.99.17) (Hydroxymethylpyrimidine phosphate synthase) (HMP-P synthase) (HMP-phosphate synthase) (HMPP synthase) (Thiamine biosynthesis protein ThiC)	thiC PSPA7_5702	PATHWAY: Cofactor biosynthesis; thiamine diphosphate biosynthesis. {ECO:0000255|HAMAP-Rule:MF_00089}.	thiamine biosynthetic process [GO:0009228]; thiamine diphosphate biosynthetic process [GO:0009229]	cytosol [GO:0005829]	4 iron, 4 sulfur cluster binding [GO:0051539]; carbon-carbon lyase activity [GO:0016830]; zinc ion binding [GO:0008270]		thiC	4.1.99.17	FUNCTION: Catalyzes the synthesis of the hydroxymethylpyrimidine phosphate (HMP-P) moiety of thiamine from aminoimidazole ribotide (AIR) in a radical S-adenosyl-L-methionine (SAM)-dependent reaction. {ECO:0000255|HAMAP-Rule:MF_00089}.	Pseudomonas aeruginosa (strain PA7)	THIC_PSEA7	UPI0000D727AA	cytosol [GO:0005829]; 4 iron, 4 sulfur cluster binding [GO:0051539]; carbon-carbon lyase activity [GO:0016830]; zinc ion binding [GO:0008270]; thiamine biosynthetic process [GO:0009228]; thiamine diphosphate biosynthetic process [GO:0009229]	GO:0005829; GO:0008270; GO:0009228; GO:0009229; GO:0016830; GO:0051539
TRINITY_DN528_c0_g2_i2	1989.28	10	1.03453e-171	-0.461879	Downregulated	SA-C vs SA	OPUCB_LISMN	Ribonucleoside-diphosphate reductase subunit alpha (EC 1.17.4.1) (Ribonucleotide reductase)	nrdA TC_0214		deoxyribonucleotide biosynthetic process [GO:0009263]	ribonucleoside-diphosphate reductase complex [GO:0005971]	ATP binding [GO:0005524]; ribonucleoside-diphosphate reductase activity, thioredoxin disulfide as acceptor [GO:0004748]		nrdA	1.17.4.1	FUNCTION: Provides the precursors necessary for DNA synthesis. Catalyzes the biosynthesis of deoxyribonucleotides from the corresponding ribonucleotides (By similarity). {ECO:0000250}.	Chlamydia muridarum (strain MoPn / Nigg)	RIR1_CHLMU	UPI0000057836	ribonucleoside-diphosphate reductase complex [GO:0005971]; ATP binding [GO:0005524]; ribonucleoside-diphosphate reductase activity, thioredoxin disulfide as acceptor [GO:0004748]; deoxyribonucleotide biosynthetic process [GO:0009263]	GO:0004748; GO:0005524; GO:0005971; GO:0009263
TRINITY_DN70_c1_g1_i2	29.35	3919.05	3.26386e-27	0.410913	Upregulated	SA-C vs SA	OPRJ_PSEAE	Phenylalanine--tRNA ligase alpha subunit (EC 6.1.1.20) (Phenylalanyl-tRNA synthetase alpha subunit) (PheRS)	pheS SACOL1148		phenylalanyl-tRNA aminoacylation [GO:0006432]	cytoplasm [GO:0005737]	ATP binding [GO:0005524]; magnesium ion binding [GO:0000287]; phenylalanine-tRNA ligase activity [GO:0004826]; transferase activity [GO:0016740]; tRNA binding [GO:0000049]		pheS	6.1.1.20		Staphylococcus aureus (strain COL)	SYFA_STAAC	UPI0000054401	cytoplasm [GO:0005737]; ATP binding [GO:0005524]; magnesium ion binding [GO:0000287]; phenylalanine-tRNA ligase activity [GO:0004826]; transferase activity [GO:0016740]; tRNA binding [GO:0000049]; phenylalanyl-tRNA aminoacylation [GO:0006432]	GO:0000049; GO:0000287; GO:0004826; GO:0005524; GO:0005737; GO:0006432; GO:0016740
TRINITY_DN687_c0_g1_i3	37	45	7.25215e-15	0.00836385	Upregulated	SA-C vs SA	OMPD_SALTS	Superoxide dismutase [Mn/Fe] 2 (EC 1.15.1.1)	sodM SAR0135			cytoplasm [GO:0005737]	metal ion binding [GO:0046872]; superoxide dismutase activity [GO:0004784]		sodM	1.15.1.1	FUNCTION: Destroys superoxide anion radicals which are normally produced within the cells and which are toxic to biological systems. Catalyzes the dismutation of superoxide anion radicals into O2 and H2O2 by successive reduction and oxidation of the transition metal ion at the active site. {ECO:0000250|UniProtKB:P80293}.	Staphylococcus aureus (strain MRSA252)	SODM2_STAAR	UPI0000054701	cytoplasm [GO:0005737]; metal ion binding [GO:0046872]; superoxide dismutase activity [GO:0004784]	GO:0004784; GO:0005737; GO:0046872
TRINITY_DN687_c0_g1_i1	11	21	0.000126105	0.0469932	Upregulated	SA-C vs SA	OMPC_SALTI	Superoxide dismutase [Mn/Fe] 1 (EC 1.15.1.1)	sodA SAR1630			cytoplasm [GO:0005737]	metal ion binding [GO:0046872]; superoxide dismutase activity [GO:0004784]		sodA	1.15.1.1	FUNCTION: Destroys superoxide anion radicals which are normally produced within the cells and which are toxic to biological systems. Catalyzes the dismutation of superoxide anion radicals into O2 and H2O2 by successive reduction and oxidation of the transition metal ion at the active site. {ECO:0000250|UniProtKB:P80293}.	Staphylococcus aureus (strain MRSA252)	SODM1_STAAR	UPI00000542C7	cytoplasm [GO:0005737]; metal ion binding [GO:0046872]; superoxide dismutase activity [GO:0004784]	GO:0004784; GO:0005737; GO:0046872
TRINITY_DN7812_c0_g1_i1	18	58026	1.50446e-133	0.683699	Upregulated	SA-C vs SA	OLSA_PSEAE	Thiol peroxidase (Tpx) (EC 1.11.1.24) (Peroxiredoxin tpx) (Prx) (Thioredoxin peroxidase) (Thioredoxin-dependent peroxiredoxin)	tpx STY1381 t1586				thioredoxin peroxidase activity [GO:0008379]		tpx	1.11.1.24	FUNCTION: Thiol-specific peroxidase that catalyzes the reduction of hydrogen peroxide and organic hydroperoxides to water and alcohols, respectively. Plays a role in cell protection against oxidative stress by detoxifying peroxides. {ECO:0000255|HAMAP-Rule:MF_00269}.	Salmonella typhi	TPX_SALTI	UPI0000059F1A	thioredoxin peroxidase activity [GO:0008379]	GO:0008379
TRINITY_DN1090_c0_g1_i3	11003.1	16.98	4.0326e-246	-0.563057	Downregulated	SA-C vs SA	ODO2_STAAW	Fructose-bisphosphate aldolase (FBP aldolase) (FBPA) (EC 4.1.2.13) (Fructose-1,6-bisphosphate aldolase)	fba fbaA SAR2213	PATHWAY: Carbohydrate degradation; glycolysis; D-glyceraldehyde 3-phosphate and glycerone phosphate from D-glucose: step 4/4.	fructose 1,6-bisphosphate metabolic process [GO:0030388]; glycolytic process [GO:0006096]		fructose-bisphosphate aldolase activity [GO:0004332]; zinc ion binding [GO:0008270]		fba	4.1.2.13	FUNCTION: Catalyzes the aldol condensation of dihydroxyacetone phosphate (DHAP or glycerone-phosphate) with glyceraldehyde 3-phosphate (G3P) to form fructose 1,6-bisphosphate (FBP) in gluconeogenesis and the reverse reaction in glycolysis. {ECO:0000250}.	Staphylococcus aureus (strain MRSA252)	ALF2_STAAR	UPI00000D7773	fructose-bisphosphate aldolase activity [GO:0004332]; zinc ion binding [GO:0008270]; fructose 1,6-bisphosphate metabolic process [GO:0030388]; glycolytic process [GO:0006096]	GO:0004332; GO:0006096; GO:0008270; GO:0030388
TRINITY_DN1090_c0_g1_i1	15732.9	18.02	1.17339e-261	-0.5886	Downregulated	SA-C vs SA	ODO2_STAAM	Lactaldehyde dehydrogenase (EC 1.2.1.22) (Aldehyde dehydrogenase A) (Glycolaldehyde dehydrogenase) (EC 1.2.1.21)	aldA ald b1415 JW1412	PATHWAY: Carbohydrate degradation; L-fucose degradation. {ECO:0000269|PubMed:3275622, ECO:0000269|PubMed:3298215}.; PATHWAY: Carbohydrate degradation; L-rhamnose degradation. {ECO:0000269|PubMed:3275622, ECO:0000269|PubMed:3298215}.	gamma-aminobutyric acid catabolic process [GO:0009450]; L-fucose catabolic process [GO:0042355]; rhamnose catabolic process [GO:0019301]	cytosol [GO:0005829]; protein-containing complex [GO:0032991]	glycolaldehyde dehydrogenase (NAD+) activity [GO:0050569]; identical protein binding [GO:0042802]; lactaldehyde dehydrogenase (NAD+) activity [GO:0008911]; succinate-semialdehyde dehydrogenase (NAD+) activity [GO:0004777]		aldA	1.2.1.21; 1.2.1.22	FUNCTION: Catalyzes the irreversible oxidation of L-lactaldehyde to L-lactate (PubMed:27671251, PubMed:3298215, PubMed:3308886, PubMed:6345530). Also shows high activity with glycolaldehyde and L-glyceraldehyde (PubMed:16731973, PubMed:31850327, PubMed:3275622, PubMed:3308886, PubMed:6345530). Has weaker activity with various aldehydes such as methylglyoxal, propionaldehyde or benzaldehyde (PubMe…	Escherichia coli (strain K12)	ALDA_ECOLI	UPI00000480BA	cytosol [GO:0005829]; protein-containing complex [GO:0032991]; glycolaldehyde dehydrogenase (NAD+) activity [GO:0050569]; identical protein binding [GO:0042802]; lactaldehyde dehydrogenase (NAD+) activity [GO:0008911]; succinate-semialdehyde dehydrogenase (NAD+) activity [GO:0004777]; gamma-aminobutyric acid catabolic process [GO:0009450]; L-fucose catabolic process [GO:0042355]; rhamnose catabol…	GO:0004777; GO:0005829; GO:0008911; GO:0009450; GO:0019301; GO:0032991; GO:0042355; GO:0042802; GO:0050569
TRINITY_DN50114_c0_g1_i1	1	108	0.0155637	0.392735	Upregulated	SA-C vs SA	ODO1_AZOVI	PTS system maltose-specific EIICB component [Includes: Maltose permease IIC component (PTS system maltose-specific EIIC component); Maltose-specific phosphotransferase enzyme IIB component (EC 2.7.1.208) (PTS system maltose-specific EIIB component)]	malP glv-2 glvC glvCB yfiB BSU08200		phosphoenolpyruvate-dependent sugar phosphotransferase system [GO:0009401]	plasma membrane [GO:0005886]	kinase activity [GO:0016301]; protein-N(PI)-phosphohistidine-sugar phosphotransferase activity [GO:0008982]; protein-phosphocysteine-sugar phosphotransferase activity [GO:0090563]		malP	2.7.1.208	FUNCTION: The phosphoenolpyruvate-dependent sugar phosphotransferase system (sugar PTS), a major carbohydrate active transport system, catalyzes the phosphorylation of incoming sugar substrates concomitantly with their translocation across the cell membrane. This system is involved in maltose transport. {ECO:0000269|PubMed:16707683}.	Bacillus subtilis (strain 168)	PTOCB_BACSU	UPI00000600CC	plasma membrane [GO:0005886]; kinase activity [GO:0016301]; protein-N(PI)-phosphohistidine-sugar phosphotransferase activity [GO:0008982]; protein-phosphocysteine-sugar phosphotransferase activity [GO:0090563]; phosphoenolpyruvate-dependent sugar phosphotransferase system [GO:0009401]	GO:0005886; GO:0008982; GO:0009401; GO:0016301; GO:0090563
TRINITY_DN1461_c3_g1_i1	156	1	3.23559e-59	-0.441053	Downregulated	SA-C vs SA	OAT1_STAAW	Cardiolipin synthase (CL synthase) (EC 2.7.8.-)	cls SAS1992		cardiolipin biosynthetic process [GO:0032049]	plasma membrane [GO:0005886]	cardiolipin synthase activity [GO:0008808]		cls	2.7.8.-	FUNCTION: Catalyzes the reversible phosphatidyl group transfer from one phosphatidylglycerol molecule to another to form cardiolipin (CL) (diphosphatidylglycerol) and glycerol. {ECO:0000255|HAMAP-Rule:MF_01916}.	Staphylococcus aureus (strain MSSA476)	CLS_STAAS	UPI00000D778F	plasma membrane [GO:0005886]; cardiolipin synthase activity [GO:0008808]; cardiolipin biosynthetic process [GO:0032049]	GO:0005886; GO:0008808; GO:0032049
TRINITY_DN28252_c0_g1_i1	4	2	2.93097e-05	-0.0677919	Downregulated	SA-C vs SA	O11H2_HUMAN	Glycerol-3-phosphate transporter (G-3-P transporter) (G-3-P permease)	glpT ybeE BSU02140		glucose-6-phosphate transport [GO:0015760]; glycerol metabolic process [GO:0006071]; phosphate ion transmembrane transport [GO:0035435]	plasma membrane [GO:0005886]	glucose 6-phosphate:phosphate antiporter activity [GO:0061513]; glycerol-3-phosphate transmembrane transporter activity [GO:0015169]		glpT		FUNCTION: Responsible for glycerol-3-phosphate uptake.	Bacillus subtilis (strain 168)	GLPT_BACSU	UPI000005FE82	plasma membrane [GO:0005886]; glucose 6-phosphate:phosphate antiporter activity [GO:0061513]; glycerol-3-phosphate transmembrane transporter activity [GO:0015169]; glucose-6-phosphate transport [GO:0015760]; glycerol metabolic process [GO:0006071]; phosphate ion transmembrane transport [GO:0035435]	GO:0005886; GO:0006071; GO:0015169; GO:0015760; GO:0035435; GO:0061513
TRINITY_DN5_c0_g1_i21	10	42970.8	6.86124e-129	0.708324	Upregulated	SA-C vs SA	NUOA1_PSEAE	Pseudouridine-5'-phosphate glycosidase (PsiMP glycosidase) (EC 4.2.1.70)	psuG MW0289		nucleobase catabolic process [GO:0046113]	cytoplasm [GO:0005737]	hydrolase activity, acting on glycosyl bonds [GO:0016798]; metal ion binding [GO:0046872]; pseudouridylate synthase activity [GO:0004730]		psuG	4.2.1.70	FUNCTION: Catalyzes the reversible cleavage of pseudouridine 5'-phosphate (PsiMP) to ribose 5-phosphate and uracil. Functions biologically in the cleavage direction, as part of a pseudouridine degradation pathway. {ECO:0000255|HAMAP-Rule:MF_01876}.	Staphylococcus aureus (strain MW2)	PSUG_STAAW	UPI00000D9C2C	cytoplasm [GO:0005737]; hydrolase activity, acting on glycosyl bonds [GO:0016798]; metal ion binding [GO:0046872]; pseudouridylate synthase activity [GO:0004730]; nucleobase catabolic process [GO:0046113]	GO:0004730; GO:0005737; GO:0016798; GO:0046113; GO:0046872
TRINITY_DN5153_c0_g2_i1	276	169	3.59733e-62	-0.0504303	Downregulated	SA-C vs SA	NU6M_HUMAN	Serine/threonine protein kinase RdoA (EC 2.7.11.1) (Serine/threonine-protein kinase SrkA) (Stress response kinase A)	rdoA srkA STM3996			cytoplasm [GO:0005737]	3-phosphoinositide-dependent protein kinase activity [GO:0004676]; AMP-activated protein kinase activity [GO:0004679]; ATP binding [GO:0005524]; DNA-dependent protein kinase activity [GO:0004677]; histone H2AS1 kinase activity [GO:0044024]; histone H2AS121 kinase activity [GO:0072371]; histone H2AT120 kinase activity [GO:1990244]; histone H2AXS139 kinase activity [GO:0035979]; histone H2BS14 kina…		rdoA	2.7.11.1	FUNCTION: A protein kinase that (auto)phosphorylates on Ser and Thr residues, probably involved in the extracytoplasmic stress response (PubMed:12511488). Probably acts to suppress the effects of stress linked to accumulation of reactive oxygen species (By similarity). {ECO:0000255|HAMAP-Rule:MF_01497, ECO:0000269|PubMed:12511488}.	Salmonella typhimurium (strain LT2 / SGSC1412 / ATCC 700720)	RDOA_SALTY	UPI00000CD50D	cytoplasm [GO:0005737]; 3-phosphoinositide-dependent protein kinase activity [GO:0004676]; AMP-activated protein kinase activity [GO:0004679]; ATP binding [GO:0005524]; DNA-dependent protein kinase activity [GO:0004677]; histone H2AS1 kinase activity [GO:0044024]; histone H2AS121 kinase activity [GO:0072371]; histone H2AT120 kinase activity [GO:1990244]; histone H2AXS139 kinase activity [GO:00359…	GO:0000287; GO:0004674; GO:0004676; GO:0004677; GO:0004679; GO:0004711; GO:0005524; GO:0005737; GO:0035175; GO:0035402; GO:0035403; GO:0035979; GO:0044022; GO:0044023; GO:0044024; GO:0044025; GO:0072354; GO:0072371; GO:0072518; GO:0106310; GO:0140823; GO:0140855; GO:0140857; GO:1990244
TRINITY_DN42690_c0_g1_i1	1	1	0.00111828	-0.00840656	Downregulated	SA-C vs SA	NU214_HUMAN	Lyso-ornithine lipid O-acyltransferase (EC 2.3.1.270)	olsA PA4351	PATHWAY: Lipid metabolism. {ECO:0000305|PubMed:21535098}.	cellular response to phosphate starvation [GO:0016036]; membrane lipid biosynthetic process [GO:0046467]; phosphatidic acid biosynthetic process [GO:0006654]	membrane [GO:0016020]	1-acylglycerol-3-phosphate O-acyltransferase activity [GO:0003841]		olsA	2.3.1.270	FUNCTION: Catalyzes the second step in the formation of ornithine lipids, which are phosphorus-free membrane lipids. Uses acyl-acyl carrier protein (acyl-AcpP) as an acyl donor and converts lyso-ornithine lipid (LOL) into ornithine lipid (OL). {ECO:0000250|UniProtKB:Q7APG1}.	Pseudomonas aeruginosa (strain ATCC 15692 / DSM 22644 / CIP 104116 / JCM 14847 / LMG 12228 / 1C / PRS 101 / PAO1)	OLSA_PSEAE	UPI00000C5CD6	membrane [GO:0016020]; 1-acylglycerol-3-phosphate O-acyltransferase activity [GO:0003841]; cellular response to phosphate starvation [GO:0016036]; membrane lipid biosynthetic process [GO:0046467]; phosphatidic acid biosynthetic process [GO:0006654]	GO:0003841; GO:0006654; GO:0016020; GO:0016036; GO:0046467
TRINITY_DN9830_c0_g2_i1	0.04	3.04	9.16923e-104	0.362627	Upregulated	SA-C vs SA	NPB12_HUMAN	NADH dehydrogenase-like protein YutJ (EC 1.6.-.-)	yutJ BSU32200				oxidoreductase activity [GO:0016491]		yutJ	1.6.-.-		Bacillus subtilis (strain 168)	YUTJ_BACSU	UPI000195C6E3	oxidoreductase activity [GO:0016491]	GO:0016491
TRINITY_DN14712_c0_g1_i2	1	2	3.93459e-10	0.0509788	Upregulated	SA-C vs SA	NPB11_HUMAN	Phosphopantetheine adenylyltransferase (EC 2.7.7.3) (Dephospho-CoA pyrophosphorylase) (Pantetheine-phosphate adenylyltransferase) (PPAT)	coaD PA0363	PATHWAY: Cofactor biosynthesis; coenzyme A biosynthesis; CoA from (R)-pantothenate: step 4/5. {ECO:0000255|HAMAP-Rule:MF_00151}.	coenzyme A biosynthetic process [GO:0015937]	cytoplasm [GO:0005737]	[citrate (pro-3S)-lyase] ligase activity [GO:0008771]; ATP binding [GO:0005524]; pantetheine-phosphate adenylyltransferase activity [GO:0004595]		coaD	2.7.7.3	FUNCTION: Reversibly transfers an adenylyl group from ATP to 4'-phosphopantetheine, yielding dephospho-CoA (dPCoA) and pyrophosphate. {ECO:0000255|HAMAP-Rule:MF_00151}.	Pseudomonas aeruginosa (strain ATCC 15692 / DSM 22644 / CIP 104116 / JCM 14847 / LMG 12228 / 1C / PRS 101 / PAO1)	COAD_PSEAE	UPI0000127CC2	cytoplasm [GO:0005737]; [citrate (pro-3S)-lyase] ligase activity [GO:0008771]; ATP binding [GO:0005524]; pantetheine-phosphate adenylyltransferase activity [GO:0004595]; coenzyme A biosynthetic process [GO:0015937]	GO:0004595; GO:0005524; GO:0005737; GO:0008771; GO:0015937
TRINITY_DN5523_c0_g1_i3	900	1	4.84013e-137	-0.591201	Downregulated	SA-C vs SA	NOSO_STAAS	Large ribosomal subunit protein uL23 (50S ribosomal protein L23)	rplW STY4360 t4067		translation [GO:0006412]	ribonucleoprotein complex [GO:1990904]; ribosome [GO:0005840]	rRNA binding [GO:0019843]; structural constituent of ribosome [GO:0003735]		rplW		FUNCTION: One of the early assembly proteins it binds 23S rRNA. One of the proteins that surrounds the polypeptide exit tunnel on the outside of the ribosome. Forms the main docking site for trigger factor binding to the ribosome. {ECO:0000255|HAMAP-Rule:MF_01369}.	Salmonella typhi	RL23_SALTI	UPI000005A7EF	ribonucleoprotein complex [GO:1990904]; ribosome [GO:0005840]; rRNA binding [GO:0019843]; structural constituent of ribosome [GO:0003735]; translation [GO:0006412]	GO:0003735; GO:0005840; GO:0006412; GO:0019843; GO:1990904
TRINITY_DN877_c1_g2_i4	2615.5	0.5	1.21864e-183	-0.741986	Downregulated	SA-C vs SA	NORG_STAAM	Macro domain-containing protein PA3693	PA3693				O-acetyl-ADP-ribose deacetylase activity [GO:0061463]					Pseudomonas aeruginosa (strain ATCC 15692 / DSM 22644 / CIP 104116 / JCM 14847 / LMG 12228 / 1C / PRS 101 / PAO1)	Y3693_PSEAE	UPI000013926E	O-acetyl-ADP-ribose deacetylase activity [GO:0061463]	GO:0061463
TRINITY_DN2758_c0_g2_i1	1067	2	1.70126e-144	-0.546399	Downregulated	SA-C vs SA	NORB_STAAM	Glutamine synthetase (GS) (EC 6.3.1.2) (Glutamate--ammonia ligase) (Glutamine synthetase I beta) (GSI beta)	glnA STY3874 t3614		glutamine biosynthetic process [GO:0006542]; nitrogen utilization [GO:0019740]	cytoplasm [GO:0005737]; membrane [GO:0016020]	ATP binding [GO:0005524]; glutamine synthetase activity [GO:0004356]; metal ion binding [GO:0046872]		glnA	6.3.1.2	FUNCTION: Catalyzes the ATP-dependent biosynthesis of glutamine from glutamate and ammonia. {ECO:0000250|UniProtKB:P0A1P6}.	Salmonella typhi	GLN1B_SALTI	UPI000005A65C	cytoplasm [GO:0005737]; membrane [GO:0016020]; ATP binding [GO:0005524]; glutamine synthetase activity [GO:0004356]; metal ion binding [GO:0046872]; glutamine biosynthetic process [GO:0006542]; nitrogen utilization [GO:0019740]	GO:0004356; GO:0005524; GO:0005737; GO:0006542; GO:0016020; GO:0019740; GO:0046872
TRINITY_DN716_c0_g1_i1	13	25	4.04722e-05	0.0476186	Upregulated	SA-C vs SA	NLPI_SALTI	Ribulose-5-phosphate reductase 2 (Ribulose-5-P reductase 2) (EC 1.1.1.405) (Ribitol-5-phosphate dehydrogenase 2)	tarJ' SAOUHSC_00221	PATHWAY: Cell wall biogenesis; poly(ribitol phosphate) teichoic acid biosynthesis. {ECO:0000255|HAMAP-Rule:MF_02069, ECO:0000269|PubMed:18556787}.	cell wall organization [GO:0071555]; poly(ribitol phosphate) teichoic acid biosynthetic process [GO:1902012]		ribitol-5-phosphate 2-dehydrogenase [(NAD(P)+] activity [GO:0050256]; zinc ion binding [GO:0008270]		tarJ'	1.1.1.405	FUNCTION: Catalyzes the NADPH dependent reduction of D-ribulose 5-phosphate to D-ribitol 5-phosphate. {ECO:0000255|HAMAP-Rule:MF_02069, ECO:0000269|PubMed:18556787}.	Staphylococcus aureus (strain NCTC 8325 / PS 47)	TARJ2_STAA8	UPI00004B5AB5	ribitol-5-phosphate 2-dehydrogenase [(NAD(P)+] activity [GO:0050256]; zinc ion binding [GO:0008270]; cell wall organization [GO:0071555]; poly(ribitol phosphate) teichoic acid biosynthetic process [GO:1902012]	GO:0008270; GO:0050256; GO:0071555; GO:1902012
TRINITY_DN29716_c0_g1_i1	8	14	1.5953e-66	0.0395385	Upregulated	SA-C vs SA	NLPD_SALDU	Rhodopsin kinase GRK7 (EC 2.7.11.14) (G protein-coupled receptor kinase 7) (G protein-coupled receptor kinase GRK7)	GRK7 GPRK7		protein autophosphorylation [GO:0046777]; regulation of opsin-mediated signaling pathway [GO:0022400]; regulation of signal transduction [GO:0009966]; signal transduction [GO:0007165]; visual perception [GO:0007601]	cytoplasm [GO:0005737]; photoreceptor disc membrane [GO:0097381]	ATP binding [GO:0005524]; rhodopsin kinase activity [GO:0050254]		GRK7	2.7.11.14	FUNCTION: Retina-specific kinase involved in the shutoff of the photoresponse and adaptation to changing light conditions via cone opsin phosphorylation, including rhodopsin (RHO). {ECO:0000269|PubMed:15946941}.	Homo sapiens (Human)	GRK7_HUMAN	UPI000004244D	cytoplasm [GO:0005737]; photoreceptor disc membrane [GO:0097381]; ATP binding [GO:0005524]; rhodopsin kinase activity [GO:0050254]; protein autophosphorylation [GO:0046777]; regulation of opsin-mediated signaling pathway [GO:0022400]; regulation of signal transduction [GO:0009966]; signal transduction [GO:0007165]; visual perception [GO:0007601]	GO:0005524; GO:0005737; GO:0007165; GO:0007601; GO:0009966; GO:0022400; GO:0046777; GO:0050254; GO:0097381
TRINITY_DN127_c0_g3_i2	7.65	4585.4	3.71443e-47	0.539564	Upregulated	SA-C vs SA	NILP1_ARATH	High-affinity branched-chain amino acid transport ATP-binding protein BraG	braG PA1070		D-alanine transmembrane transport [GO:0042941]; L-alanine transport [GO:0015808]; L-amino acid transport [GO:0015807]	plasma membrane [GO:0005886]	ATP binding [GO:0005524]; ATP hydrolysis activity [GO:0016887]; branched-chain amino acid transmembrane transporter activity [GO:0015658]		braG		FUNCTION: Component of the high affinity leucine, isoleucine, valine, transport system (LIV-I), which is operative without Na(+) and is specific for alanine and threonine, in addition to branched-chain amino acids.	Pseudomonas aeruginosa (strain ATCC 15692 / DSM 22644 / CIP 104116 / JCM 14847 / LMG 12228 / 1C / PRS 101 / PAO1)	BRAG_PSEAE	UPI0000126ABB	plasma membrane [GO:0005886]; ATP binding [GO:0005524]; ATP hydrolysis activity [GO:0016887]; branched-chain amino acid transmembrane transporter activity [GO:0015658]; D-alanine transmembrane transport [GO:0042941]; L-alanine transport [GO:0015808]; L-amino acid transport [GO:0015807]	GO:0005524; GO:0005886; GO:0015658; GO:0015807; GO:0015808; GO:0016887; GO:0042941
TRINITY_DN14395_c1_g1_i4	4945.63	2.5	2.34052e-211	-0.658677	Downregulated	SA-C vs SA	NFRA_STAAW	ATP-dependent Clp protease ATP-binding subunit ClpX	clpX SEN0431		cell division [GO:0051301]; proteolysis involved in protein catabolic process [GO:0051603]	HslUV protease complex [GO:0009376]	ATP binding [GO:0005524]; ATP hydrolysis activity [GO:0016887]; ATP-dependent protein folding chaperone [GO:0140662]; protein dimerization activity [GO:0046983]; unfolded protein binding [GO:0051082]; zinc ion binding [GO:0008270]		clpX		FUNCTION: ATP-dependent specificity component of the Clp protease. It directs the protease to specific substrates. Can perform chaperone functions in the absence of ClpP. {ECO:0000255|HAMAP-Rule:MF_00175}.	Salmonella enteritidis PT4 (strain P125109)	CLPX_SALEP	UPI00018118F8	HslUV protease complex [GO:0009376]; ATP binding [GO:0005524]; ATP hydrolysis activity [GO:0016887]; ATP-dependent protein folding chaperone [GO:0140662]; protein dimerization activity [GO:0046983]; unfolded protein binding [GO:0051082]; zinc ion binding [GO:0008270]; cell division [GO:0051301]; proteolysis involved in protein catabolic process [GO:0051603]	GO:0005524; GO:0008270; GO:0009376; GO:0016887; GO:0046983; GO:0051082; GO:0051301; GO:0051603; GO:0140662
TRINITY_DN2069_c0_g1_i2	3455.8	1	9.19318e-196	-0.70647	Downregulated	SA-C vs SA	NDH_STAAM	Endogenous retrovirus group S71 member 1 Env polyprotein (Envelope polyprotein) (HERV-T Env protein) (HERV-T_19q13.11 provirus ancestral Env polyprotein) [Includes: Surface protein (SU); Transmembrane protein (TM)]	ERVS71-1			plasma membrane [GO:0005886]			ERVS71-1		FUNCTION: Retroviral envelope proteins mediate receptor recognition and membrane fusion during early infection. Endogenous envelope proteins may have kept, lost or modified their original function during evolution. This endogenous envelope protein has lost its original fusogenic properties. {ECO:0000269|PubMed:14557543}.	Homo sapiens (Human)	ENVT1_HUMAN	UPI0000367849	plasma membrane [GO:0005886]	GO:0005886
TRINITY_DN45800_c0_g1_i1	1	351	5.80491e-08	0.493716	Upregulated	SA-C vs SA	NDH_ECOLI	Type IV pilus assembly ATPase PilB	pilB PA4526		cell motility [GO:0048870]; protein transport [GO:0015031]; type IV pilus assembly [GO:0043683]; type IV pilus-dependent motility [GO:0043107]	cytoplasm [GO:0005737]; plasma membrane [GO:0005886]	ATP binding [GO:0005524]; ATP hydrolysis activity [GO:0016887]; metal ion binding [GO:0046872]		pilB		FUNCTION: ATPase component of the type IV pilus (T4P) that plays a role in surface and host cell adhesion, colonization, biofilm maturation, virulence, and twitching, a form of surface-associated motility facilitated by cycles of extension, adhesion, and retraction of T4P fibers (PubMed:15659660, PubMed:28854278). Acts as a molecular motor to provide the energy that is required for biogenesis of …	Pseudomonas aeruginosa (strain ATCC 15692 / DSM 22644 / CIP 104116 / JCM 14847 / LMG 12228 / 1C / PRS 101 / PAO1)	PILB_PSEAE	UPI0000131AC4	cytoplasm [GO:0005737]; plasma membrane [GO:0005886]; ATP binding [GO:0005524]; ATP hydrolysis activity [GO:0016887]; metal ion binding [GO:0046872]; cell motility [GO:0048870]; protein transport [GO:0015031]; type IV pilus assembly [GO:0043683]; type IV pilus-dependent motility [GO:0043107]	GO:0005524; GO:0005737; GO:0005886; GO:0015031; GO:0016887; GO:0043107; GO:0043683; GO:0046872; GO:0048870
TRINITY_DN371_c0_g1_i1	1896.63	4	1.22618e-169	-0.536296	Downregulated	SA-C vs SA	NANA_STAAW	Methyl-accepting chemotaxis protein McpA	mcpA cttP PA0180		chemotaxis [GO:0006935]; signal transduction [GO:0007165]	plasma membrane [GO:0005886]	transmembrane signaling receptor activity [GO:0004888]		mcpA		FUNCTION: Involved in chemotaxis. Required for an optimal chemotactic response. {ECO:0000269|PubMed:12142407}.	Pseudomonas aeruginosa (strain ATCC 15692 / DSM 22644 / CIP 104116 / JCM 14847 / LMG 12228 / 1C / PRS 101 / PAO1)	MCPA_PSEAE	UPI00000C4F82	plasma membrane [GO:0005886]; transmembrane signaling receptor activity [GO:0004888]; chemotaxis [GO:0006935]; signal transduction [GO:0007165]	GO:0004888; GO:0005886; GO:0006935; GO:0007165
TRINITY_DN20713_c0_g1_i3	1	1	3.32295e-122	-0.00840656	Downregulated	SA-C vs SA	MUC19_HUMAN	Exodeoxyribonuclease 7 small subunit (EC 3.1.11.6) (Exodeoxyribonuclease VII small subunit) (Exonuclease VII small subunit)	xseB PA4042		DNA catabolic process [GO:0006308]	cytosol [GO:0005829]; exodeoxyribonuclease VII complex [GO:0009318]	exodeoxyribonuclease VII activity [GO:0008855]		xseB	3.1.11.6	FUNCTION: Bidirectionally degrades single-stranded DNA into large acid-insoluble oligonucleotides, which are then degraded further into small acid-soluble oligonucleotides. {ECO:0000255|HAMAP-Rule:MF_00337}.	Pseudomonas aeruginosa (strain ATCC 15692 / DSM 22644 / CIP 104116 / JCM 14847 / LMG 12228 / 1C / PRS 101 / PAO1)	EX7S_PSEAE	UPI000012A319	cytosol [GO:0005829]; exodeoxyribonuclease VII complex [GO:0009318]; exodeoxyribonuclease VII activity [GO:0008855]; DNA catabolic process [GO:0006308]	GO:0005829; GO:0006308; GO:0008855; GO:0009318
TRINITY_DN59_c0_g1_i7	37060.7	33.99	7.05223e-299	-0.607638	Downregulated	SA-C vs SA	MTSB_STRPA	DNA-directed RNA polymerase subunit beta' (RNAP subunit beta') (EC 2.7.7.6) (RNA polymerase subunit beta') (Transcriptase subunit beta')	rpoC SPA3992			DNA-directed RNA polymerase complex [GO:0000428]	DNA binding [GO:0003677]; magnesium ion binding [GO:0000287]; plastid single subunit type RNA polymerase activity [GO:0001066]; RNA polymerase I activity [GO:0001054]; RNA polymerase II activity [GO:0001055]; RNA polymerase III activity [GO:0001056]; RNA polymerase IV activity [GO:0001057]; RNA polymerase V activity [GO:0001058]; zinc ion binding [GO:0008270]		rpoC	2.7.7.6	FUNCTION: DNA-dependent RNA polymerase catalyzes the transcription of DNA into RNA using the four ribonucleoside triphosphates as substrates. {ECO:0000255|HAMAP-Rule:MF_01322}.	Salmonella paratyphi A (strain ATCC 9150 / SARB42)	RPOC_SALPA	UPI000048F256	DNA-directed RNA polymerase complex [GO:0000428]; DNA binding [GO:0003677]; magnesium ion binding [GO:0000287]; plastid single subunit type RNA polymerase activity [GO:0001066]; RNA polymerase I activity [GO:0001054]; RNA polymerase II activity [GO:0001055]; RNA polymerase III activity [GO:0001056]; RNA polymerase IV activity [GO:0001057]; RNA polymerase V activity [GO:0001058]; zinc ion binding …	GO:0000287; GO:0000428; GO:0001054; GO:0001055; GO:0001056; GO:0001057; GO:0001058; GO:0001066; GO:0003677; GO:0008270
TRINITY_DN75_c3_g1_i1	1	3022	1.1752e-45	0.678165	Upregulated	SA-C vs SA	MSRA_PSEAB	Thiosulfate sulfurtransferase (TST) (EC 2.8.1.1) (Rhodanese RhdA) (Thiosulfate:cyanide sulfurtransferase)	rhdA PA4956		response to toxic substance [GO:0009636]	cytoplasm [GO:0005737]	thiosulfate sulfurtransferase activity [GO:0004792]		rhdA	2.8.1.1	FUNCTION: Catalyzes the sulfur transfer reaction from thiosulfate to cyanide, thus converting cyanide to the less toxic thiocyanate (PubMed:15522204). Contributes to P.aeruginosa survival under cyanogenic conditions, and thus provides the bacterium with a defense mechanism against endogenous cyanide toxicity (PubMed:17098912). Is the main cytoplasmic rhodanese in P.aeruginosa, accounting for 90% …	Pseudomonas aeruginosa (strain ATCC 15692 / DSM 22644 / CIP 104116 / JCM 14847 / LMG 12228 / 1C / PRS 101 / PAO1)	THTR_PSEAE	UPI00000C5E93	cytoplasm [GO:0005737]; thiosulfate sulfurtransferase activity [GO:0004792]; response to toxic substance [GO:0009636]	GO:0004792; GO:0005737; GO:0009636
TRINITY_DN40591_c0_g1_i1	29	82455	1.27566e-139	0.672942	Upregulated	SA-C vs SA	MRAZ_PSEAE	Peptide methionine sulfoxide reductase MsrA (Protein-methionine-S-oxide reductase) (EC 1.8.4.11) (Peptide-methionine (S)-S-oxide reductase) (Peptide Met(O) reductase)	msrA PA14_66330		cellular response to oxidative stress [GO:0034599]; protein modification process [GO:0036211]	cytoplasm [GO:0005737]	L-methionine-(S)-S-oxide reductase activity [GO:0036456]; peptide-methionine (S)-S-oxide reductase activity [GO:0008113]		msrA	1.8.4.11	FUNCTION: Has an important function as a repair enzyme for proteins that have been inactivated by oxidation. Catalyzes the reversible oxidation-reduction of methionine sulfoxide in proteins to methionine. {ECO:0000255|HAMAP-Rule:MF_01401}.	Pseudomonas aeruginosa (strain UCBPP-PA14)	MSRA_PSEAB	UPI0000396F81	cytoplasm [GO:0005737]; L-methionine-(S)-S-oxide reductase activity [GO:0036456]; peptide-methionine (S)-S-oxide reductase activity [GO:0008113]; cellular response to oxidative stress [GO:0034599]; protein modification process [GO:0036211]	GO:0005737; GO:0008113; GO:0034599; GO:0036211; GO:0036456
TRINITY_DN274_c0_g2_i1	8462	2	1.05224e-234	-0.723809	Downregulated	SA-C vs SA	MQO2_STAAW	Glutamine synthetase (GS) (EC 6.3.1.2) (Glutamate--ammonia ligase) (Glutamine synthetase I alpha) (GSI alpha)	glnA SAS1242		glutamine biosynthetic process [GO:0006542]	cytoplasm [GO:0005737]	ATP binding [GO:0005524]; glutamine synthetase activity [GO:0004356]; metal ion binding [GO:0046872]		glnA	6.3.1.2	FUNCTION: Glutamine synthetase (GS) is an unusual multitasking protein that functions as an enzyme, a transcription coregulator, and a chaperone in ammonium assimilation and in the regulation of genes involved in nitrogen metabolism. It catalyzes the ATP-dependent biosynthesis of glutamine from glutamate and ammonia. Feedback-inhibited GlnA also interacts with and regulates the activity of the tr…	Staphylococcus aureus (strain MSSA476)	GLN1A_STAAS	UPI000012B701	cytoplasm [GO:0005737]; ATP binding [GO:0005524]; glutamine synthetase activity [GO:0004356]; metal ion binding [GO:0046872]; glutamine biosynthetic process [GO:0006542]	GO:0004356; GO:0005524; GO:0005737; GO:0006542; GO:0046872
TRINITY_DN616_c0_g2_i2	12778.9	10	1.27594e-252	-0.621237	Downregulated	SA-C vs SA	MQO2_STAAR	Small ribosomal subunit protein uS9 (30S ribosomal protein S9)	rpsI SACOL2206		translation [GO:0006412]	cytosolic small ribosomal subunit [GO:0022627]	RNA binding [GO:0003723]; structural constituent of ribosome [GO:0003735]		rpsI			Staphylococcus aureus (strain COL)	RS9_STAAC	UPI0000048023	cytosolic small ribosomal subunit [GO:0022627]; RNA binding [GO:0003723]; structural constituent of ribosome [GO:0003735]; translation [GO:0006412]	GO:0003723; GO:0003735; GO:0006412; GO:0022627
TRINITY_DN88_c0_g7_i1	2	9644	8.13702e-81	0.718198	Upregulated	SA-C vs SA	MQO2_PSEAE	UPF0213 protein PA3854	PA3854									Pseudomonas aeruginosa (strain ATCC 15692 / DSM 22644 / CIP 104116 / JCM 14847 / LMG 12228 / 1C / PRS 101 / PAO1)	Y3854_PSEAE	UPI00001395C2
TRINITY_DN11567_c0_g2_i1	1	3196	4.37153e-47	0.682961	Upregulated	SA-C vs SA	MPL_ECOLI	Carbamate kinase 1 (EC 2.7.2.2)	arcC1 SAV1170	PATHWAY: Metabolic intermediate metabolism; carbamoyl phosphate degradation; CO(2) and NH(3) from carbamoyl phosphate: step 1/1.	arginine deiminase pathway [GO:0019546]	cytosol [GO:0005829]	ATP binding [GO:0005524]; carbamate kinase activity [GO:0008804]		arcC1	2.7.2.2		Staphylococcus aureus (strain Mu50 / ATCC 700699)	ARCC1_STAAM	UPI00000D7653	cytosol [GO:0005829]; ATP binding [GO:0005524]; carbamate kinase activity [GO:0008804]; arginine deiminase pathway [GO:0019546]	GO:0005524; GO:0005829; GO:0008804; GO:0019546
TRINITY_DN982_c0_g1_i1	6696	5	1.56845e-224	-0.625252	Downregulated	SA-C vs SA	MOAE_STAAW	Inner membrane protein YohC	yohC c2667			plasma membrane [GO:0005886]			yohC			Escherichia coli O6:H1 (strain CFT073 / ATCC 700928 / UPEC)	YOHC_ECOL6	UPI000013BC7F	plasma membrane [GO:0005886]	GO:0005886
TRINITY_DN31049_c0_g1_i1	4	699	1.32398e-11	0.433964	Upregulated	SA-C vs SA	MNTP_PSEAE	High frequency lysogenization protein HflD homolog	hflD PA2627			cytoplasm [GO:0005737]; plasma membrane [GO:0005886]			hflD			Pseudomonas aeruginosa (strain ATCC 15692 / DSM 22644 / CIP 104116 / JCM 14847 / LMG 12228 / 1C / PRS 101 / PAO1)	HFLD_PSEAE	UPI00000C5774	cytoplasm [GO:0005737]; plasma membrane [GO:0005886]	GO:0005737; GO:0005886
TRINITY_DN13095_c0_g1_i1	1	2906	2.13262e-44	0.674811	Upregulated	SA-C vs SA	MNMC_PSEAB	Cytochrome c551 peroxidase (CCP) (Cytochrome c peroxidase) (EC 1.11.1.5)	ccpA PA4587			periplasmic space [GO:0042597]	cytochrome-c peroxidase activity [GO:0004130]; electron transfer activity [GO:0009055]; heme binding [GO:0020037]; metal ion binding [GO:0046872]		ccpA	1.11.1.5	FUNCTION: Catalyzes the peroxidative oxidation of azurin and cytochrome c551. Likely to provide protection against toxic peroxides.	Pseudomonas aeruginosa (strain ATCC 15692 / DSM 22644 / CIP 104116 / JCM 14847 / LMG 12228 / 1C / PRS 101 / PAO1)	CCPR_PSEAE	UPI00001272FD	periplasmic space [GO:0042597]; cytochrome-c peroxidase activity [GO:0004130]; electron transfer activity [GO:0009055]; heme binding [GO:0020037]; metal ion binding [GO:0046872]	GO:0004130; GO:0009055; GO:0020037; GO:0042597; GO:0046872
[truncated: 215 more rows]

## Sheet: Count-of GO-terms
Description	Count	Category
tricarboxylic acid cycle	13	BP
regulation of DNA-templated transcription	12	BP
cell wall organization	9	BP
cell division	8	BP
negative regulation of DNA-templated transcription	7	BP
one-carbon metabolic process	6	BP
signal transduction	6	BP
isoleucine biosynthetic process	6	BP
glycolytic process	6	BP
phosphorelay signal transduction system	6	BP
protein transport	5	BP
transmembrane transport	5	BP
cell redox homeostasis	5	BP
response to antibiotic	5	BP
DNA recombination	5	BP
[truncated: 852 more rows]

## Sheet: Pathway-count
Pathway	Count
[truncated: 36 more rows]
